# Supplementary material for: The impact of heterozygous BRCA1 mutations on ovarian angiogenesis
Source: Research Square preprint supplement (doi:10.21203/rs.3.rs-7980820/v1), 2025-12-04
Supplement: Supplementary file 1 [file 0678ab36aebb867cf6f15159.xlsx]

## Sheet: Sheet1
pmcid	pmcidTitle	table	column	description	geneSetSize	nOverlap	oddsRatio	pvalue	adjPvalue	geneSetHash
PMC10003015	Histone Modifications Represent a Key Epigenetic Feature of Epithelial-to-Mesenchyme Transition in Pancreatic Cancer	ijms-24-04820.nxml	Name	changes, and a balance between histone-modifying enzymes is critical for maintaining normal cellular function (**Table 1**) Histone-modifying enzymes in pancreatic cancerPRMT1PRMT5KMT1CKMT2AKMT2DKMT3AKMT3C/EKMT4KMT5AKMT5CKMT6KDM1AKDM2BKDM3AKDM4AKDM4BKDM5AKDM6Ap300/CBPHAT1HDAC 1HDAC 2HDAC5SIRT1SIRT6Ring1A, Ring1B, Bmi1USP22USP28	23	6	4.45878	0.00168373	0.0199828	d5ec1486-3cbc-57d3-b1fe-fd1e9d47cd45
PMC10022497	Assessing the epithelial-to-mesenchymal plasticity in a small cell lung carcinoma (SCLC) and lung fibroblasts co-culture model	Table1.XLSX	H69MIXvsH69CT_2FC_0_05P-Gene_Symbol		659	65	1.68842	2.0298e-05	0.000471097	9e61c747-f50d-5740-9269-9ad8167f4b2d
PMC10022497	Assessing the epithelial-to-mesenchymal plasticity in a small cell lung carcinoma (SCLC) and lung fibroblasts co-culture model	Table1.XLSX	DEG-Gene_Symbol		634	62	1.67146	4.2648e-05	0.000900044	f536f842-5669-546e-8b12-62c82e352bbe
PMC10022497	Assessing the epithelial-to-mesenchymal plasticity in a small cell lung carcinoma (SCLC) and lung fibroblasts co-culture model	Table2.XLSX	H69MIXvsH69INS_2FC_0_05P-Gene_Symbol		594	56	1.61408	0.000247952	0.00406963	44dd01ba-61e4-5d67-b1f8-ab4b4e3775d5
PMC10022497	Assessing the epithelial-to-mesenchymal plasticity in a small cell lung carcinoma (SCLC) and lung fibroblasts co-culture model	Table2.XLSX	DEG-Gene_Symbol		578	53	1.56726	0.000721643	0.00997441	e55dab6f-7d7b-5e00-a68e-ab9a537bc802
PMC10022497	Assessing the epithelial-to-mesenchymal plasticity in a small cell lung carcinoma (SCLC) and lung fibroblasts co-culture model	Table5.XLSX	DEG-Gene_Symbol		203	23	1.93653	0.0017943	0.0210346	b92bcd5b-52cc-5d98-9adb-9a85f452fb5e
PMC10022497	Assessing the epithelial-to-mesenchymal plasticity in a small cell lung carcinoma (SCLC) and lung fibroblasts co-culture model	Table1.XLSX	FDR_0_1-Gene_Symbol		352	34	1.65093	0.00275453	0.0294836	95db1d7b-4a12-5375-8ef5-db2ae781555d
PMC10022497	Assessing the epithelial-to-mesenchymal plasticity in a small cell lung carcinoma (SCLC) and lung fibroblasts co-culture model	Table2.XLSX	ZEB1YAP1_genes_and_H69_genes-H69_upregulated_genes		332	32	1.64742	0.0037333	0.0375026	66021734-0251-5563-8efa-cab23dcf703c
PMC10025550	Epigenetic control of mesenchymal stem cells orchestrates bone regeneration	fendo-14-1126787.nxml	Enzyme	MSCs differentiation. The roles of histone modification in MSCs' osteogenic differentiation are summarized in **Table 1** Histone modification in MSCs’ osteogenic differentiationSETD2H3K36me3FBXO25ASH1LJMJD2B/KDM4BG9ALSD1H3K4me2KDM1A.Not givenKDM2AKDM3AKDM4AKDM4BDMSCs(Human)KDM6AEZH2P300H3K27acH3K9ac H3K27acGCN5H3K9ac H3K14acPCAFHDAC1HDAC1&2H3K9acHDAC1SIRT1&2HDAC2HDAC2&3HDAC3HDAC4HDAC5HDAC6HDAC7H…	22	7	5.43836	0.000179824	0.00309882	a2910784-33fd-5fa0-8d4e-42debe07314a
PMC10042678	Identification and validation of eight estrogen-related genes for predicting prognosis of papillary thyroid cancer	aging-15-204582-s002.docx	0-HALLMARK_ESTROGEN_RESPONSE_EARLY	To find independent prognostic factors, we downloaded ERGs sets (**Supplementary Table 1**)	200	23	1.96558	0.00147383	0.017908	a66ee8d0-6d6f-575d-930b-53f3f3733ffe
PMC10061289	Imaging phenotypes from MRI for the prediction of glioma immune subtypes from RNA sequencing: A multicenter study	MOL2-17-629-s002.xlsx	Hallmark_genesets-Unnamed_13	glioma single‐cell RNA studies were included to form a glioma‐specific immune gene panel (Table **S2**) Table S2. Gene sets of transcriptomic signatures Click here for additional data file	200	27	2.30742	4.14181e-05	0.000877629	306584cc-9f04-555c-9c59-87523724e2a6
PMC10061289	Imaging phenotypes from MRI for the prediction of glioma immune subtypes from RNA sequencing: A multicenter study	MOL2-17-629-s002.xlsx	Hallmark_genesets-Supplementary_Table_2c_Hallmark_Transcriptomic_Signatures	glioma single‐cell RNA studies were included to form a glioma‐specific immune gene panel (Table **S2**) Table S2. Gene sets of transcriptomic signatures Click here for additional data file	200	26	2.22196	0.000107886	0.00200845	d026b43b-724d-5d8b-8cec-5914c9207998
PMC10061289	Imaging phenotypes from MRI for the prediction of glioma immune subtypes from RNA sequencing: A multicenter study	MOL2-17-629-s002.xlsx	Hallmark_genesets-Unnamed_12	glioma single‐cell RNA studies were included to form a glioma‐specific immune gene panel (Table **S2**) Table S2. Gene sets of transcriptomic signatures Click here for additional data file	97	13	2.29068	0.00417852	0.0407537	a63e2858-8085-5347-940a-825fb4396fbd
PMC10068170	Development and validation of a glioma-associated mesenchymal stem cell-related gene prognostic index for predicting prognosis and guiding individualized therapy in glioma	13287_2023_3285_MOESM3_ESM.xls	Sheet1-Primer	manufacturer's instructions, cDNA was synthesized by reverse transcription using a reverse transcription kit (Takara RR0**3**) Additional file 3. Table S3: Details of all primer sequences	9	4	7.59644	0.00115654	0.0147021	ffe16625-7362-5d6b-a0a3-8a393faa1f6c
PMC10090171	Reprogramming of human peripheral blood mononuclear cells into induced mesenchymal stromal cells using non-integrating vectors	42003_2023_4737_MOESM10_ESM.xlsx	Supplementary_Data_7-Unnamed_7	this time point, and the nonintegrating episomal viral vectors were cleared from the reprogrammed cells**7** Supplementary Data 7	1238	137	1.89144	7.38071e-14	9.84624e-12	74e349d5-067b-5bc4-9813-e27ba2d9c963
PMC10090171	Reprogramming of human peripheral blood mononuclear cells into induced mesenchymal stromal cells using non-integrating vectors	42003_2023_4737_MOESM10_ESM.xlsx	Supplementary_Data_7-Supplementary_Data_7_DEGs_when_comparing_4FnoO_iMSCs_with_5F_iMSCs	this time point, and the nonintegrating episomal viral vectors were cleared from the reprogrammed cells**7** Supplementary Data 7	1240	137	1.88839	8.35609e-14	1.10445e-11	d9c92f35-52bb-54f7-95e0-31bc7b1d2a7e
PMC10097668	Inflammatory signals from fatty bone marrow support DNMT3A driven clonal hematopoiesis	41467_2023_36906_MOESM8_ESM.xlsx	INFG_Gene_set-HALLMARK_INTERFERON_GAMMA_RESPONSE	analysis from the scRNA-seq data. Unsupervised clustering of the single cells using the UMAP algorithm**4** Supplementary data 4	200	27	2.30742	4.14181e-05	0.000877629	306584cc-9f04-555c-9c59-87523724e2a6
PMC10097668	Inflammatory signals from fatty bone marrow support DNMT3A driven clonal hematopoiesis	41467_2023_36906_MOESM8_ESM.xlsx	INFA_Gene_set-HALLMARK_INTERFERON_ALPHA_RESPONSE	analysis from the scRNA-seq data. Unsupervised clustering of the single cells using the UMAP algorithm**4** Supplementary data 4	97	13	2.29068	0.00417852	0.0407537	a63e2858-8085-5347-940a-825fb4396fbd
PMC10133466	Effects of human placenta cryopreservation on molecular characteristics of placental mesenchymal stromal cells	Table3.XLSX	Antigen_representing-DEGs_enriched_by_the_functional_blocks_related_to_antigen_presenting	Click here for additional data file	6	3	8.54599	0.00349227	0.0355141	5cc8560f-d495-514d-9005-f361afdf6072
PMC10133466	Effects of human placenta cryopreservation on molecular characteristics of placental mesenchymal stromal cells	Table3.XLSX	Antigen_representing-Unnamed_7	Click here for additional data file	6	3	8.54599	0.00349227	0.0355141	5cc8560f-d495-514d-9005-f361afdf6072
PMC10134284	An immune, stroma, and epithelial–mesenchymal transition‐related signature for predicting recurrence and chemotherapy benefit in stage II–III colorectal cancer	CAM4-12-8924-s003.xlsx	Sheet1-Unnamed_2	genes were identified from the published literature and MSigDB (The Molecular Signatures Database) (Table **S1**) Table S1 Click here for additional data file	106	16	2.57992	0.000424141	0.00641481	4ce41763-2b50-56a4-baf0-2c1142ffaedb
PMC10134742	Limiting Mrs2-dependent mitochondrial Mg2+ uptake induces metabolic programming in prolonged dietary stress	NIHMS1887266-supplement-2.xlsx	Fig3F_iWAT-TF-TF	key resources table. Additional information regarding RNA-seq data and analysis can be found in **Data S1**	1609	136	1.44469	3.47613e-06	9.8871e-05	b94103e7-6fb5-5429-8416-113e251632f8
PMC10134742	Limiting Mrs2-dependent mitochondrial Mg2+ uptake induces metabolic programming in prolonged dietary stress	NIHMS1887266-supplement-2.xlsx	FigS3G_Liver-TF-TF	key resources table. Additional information regarding RNA-seq data and analysis can be found in **Data S1**	1609	136	1.44469	3.47613e-06	9.8871e-05	b94103e7-6fb5-5429-8416-113e251632f8
PMC10160107	Reversible transitions between noradrenergic and mesenchymal tumor identities define cell plasticity in neuroblastoma	41467_2023_38239_MOESM3_ESM.xlsx	Supp_Data_2-Unnamed_2	We next explored neuroblastoma intra-tumor heterogeneity using single-cell transcriptomic analyses with the **1** Supplementary Data 1 & 2	2111	179	1.4493	4.59089e-08	2.03648e-06	9e4ba71d-da63-52ca-b210-75160959c35a
PMC10188538	HUNK inhibits epithelial-mesenchymal transition of CRC via direct phosphorylation of GEF-H1 and activating RhoA/LIMK-1/CFL-1	41419_2023_5849_MOESM1_ESM.xlsx	KOvsWT-Gene_name	Dataset 1	440	66	2.5638	1.20291e-12	1.30017e-10	653f4a62-64c0-5e0d-8a06-4a1e96899cc4
PMC10202654	Mesenchymal loss of p53 alters stem cell capacity and models human soft tissue sarcoma traits	mmc3.xlsx	Cluster_markers-CLUSTER0	MSCs, and this trend was further enhanced in p53Δ/Δ USTS (Figures 2L–2N and S1Q, **Table S2**) Table S2. Gene sets used for GSEA	172	36	3.57739	1.55805e-11	1.37615e-09	c7d45c80-70b8-5e8e-b713-dc995d8b2b18
PMC10202654	Mesenchymal loss of p53 alters stem cell capacity and models human soft tissue sarcoma traits	mmc8.xlsx	cluster0_markers-Unnamed_0	EBF1, and EBF3, which are highly expressed in undifferentiated MSCs (Figures 6E and S5A, **Table S7**) Table S7. Cluster markers	172	36	3.57739	1.55805e-11	1.37615e-09	c7d45c80-70b8-5e8e-b713-dc995d8b2b18
PMC10202654	Mesenchymal loss of p53 alters stem cell capacity and models human soft tissue sarcoma traits	mmc3.xlsx	MSC_markers-COMMON_MSC_MARKERS	MSCs, and this trend was further enhanced in p53Δ/Δ USTS (Figures 2L–2N and S1Q, **Table S2**) Table S2. Gene sets used for GSEA	386	54	2.39111	1.92723e-09	1.14959e-07	1d15f4d5-182e-5153-980f-0e3188f3c538
PMC10202654	Mesenchymal loss of p53 alters stem cell capacity and models human soft tissue sarcoma traits	mmc3.xlsx	Sarcoma_markers-FIB	MSCs, and this trend was further enhanced in p53Δ/Δ USTS (Figures 2L–2N and S1Q, **Table S2**) Table S2. Gene sets used for GSEA	427	48	1.92135	9.89298e-06	0.000250208	03e218d8-21a2-5259-90f4-1a57f92d7d07
PMC10202654	Mesenchymal loss of p53 alters stem cell capacity and models human soft tissue sarcoma traits	mmc3.xlsx	Cluster_markers-CLUSTER4	MSCs, and this trend was further enhanced in p53Δ/Δ USTS (Figures 2L–2N and S1Q, **Table S2**) Table S2. Gene sets used for GSEA	592	58	1.67455	7.17467e-05	0.00141292	8f4267a9-1aa5-5973-be27-9d78cbc5bdd1
PMC10202654	Mesenchymal loss of p53 alters stem cell capacity and models human soft tissue sarcoma traits	mmc8.xlsx	cluster4_markers-Unnamed_0	EBF1, and EBF3, which are highly expressed in undifferentiated MSCs (Figures 6E and S5A, **Table S7**) Table S7. Cluster markers	592	58	1.67455	7.17467e-05	0.00141292	8f4267a9-1aa5-5973-be27-9d78cbc5bdd1
PMC10202654	Mesenchymal loss of p53 alters stem cell capacity and models human soft tissue sarcoma traits	mmc3.xlsx	Cluster_markers-CLUSTER2	MSCs, and this trend was further enhanced in p53Δ/Δ USTS (Figures 2L–2N and S1Q, **Table S2**) Table S2. Gene sets used for GSEA	100	16	2.73472	0.000214983	0.00360829	eb88379e-5168-59cd-8884-292dcd80627f
PMC10202654	Mesenchymal loss of p53 alters stem cell capacity and models human soft tissue sarcoma traits	mmc8.xlsx	cluster2_markers-Unnamed_0	EBF1, and EBF3, which are highly expressed in undifferentiated MSCs (Figures 6E and S5A, **Table S7**) Table S7. Cluster markers	100	16	2.73472	0.000214983	0.00360829	eb88379e-5168-59cd-8884-292dcd80627f
PMC10202654	Mesenchymal loss of p53 alters stem cell capacity and models human soft tissue sarcoma traits	mmc3.xlsx	Sarcoma_markers-MYO	MSCs, and this trend was further enhanced in p53Δ/Δ USTS (Figures 2L–2N and S1Q, **Table S2**) Table S2. Gene sets used for GSEA	461	41	1.52342	0.00459587	0.0441286	ce805956-34af-585c-a4ae-8ce7082c8c87
PMC10203235	Senescence induces fundamental changes in the secretome of mesenchymal stromal cells (MSCs): implications for the therapeutic use of MSCs and their derivates	Table2.DOCX	0-Detected_Secretome	Click here for additional data file	43	8	3.1799	0.00309549	0.0323321	62ee5b3e-6f4f-566c-bf37-a866d6ba6f2c
PMC10203545	Vitamin D inhibits osteosarcoma by reprogramming nonsense-mediated RNA decay and SNAI2-mediated epithelial-to-mesenchymal transition	Table_4.xlsx	LM7_underrepresented-DMRTA1	Click here for additional data file	730	63	1.47506	0.0011156	0.0143243	790f3d4c-3d71-5178-b700-89e6a6f19ce5
PMC10203545	Vitamin D inhibits osteosarcoma by reprogramming nonsense-mediated RNA decay and SNAI2-mediated epithelial-to-mesenchymal transition	Table_5.xlsx	underrepresented-MTAP	Click here for additional data file	716	59	1.41039	0.00430988	0.0417952	5226c6f6-7bdc-5bd3-ac7f-b18409547088
PMC10215669	Human Bone Marrow-Derived Mesenchymal Stem Cell Applications in Neurodegenerative Disease Treatment and Integrated Omics Analysis for Successful Stem Cell Therapy	bioengineering-10-00621.nxml	Symbol	gene in the transcriptomic networks is listed in Table 2 (6 h-stored groups) and **Table 3** Ingenuity-pathway-analysis-based transcriptome profiles of the 12 h-stored hBM-MSCsABCC1ABL2AGO2AKT3ALKBH1ANGPT1APPARNTATF3ATF6ATMBAXBCL2BCL2L13BCORBMAL1BPNT1BRD3CAMSAP2CCAR1CCL2CD200CDK12CDK13CREB1CREMCTSVCYGBDIP2ADSTDTNAEGR1EIF2AK4ELP1ENGEPAS1EPHB2EPORERN1FASFGFR2FN1GDNFGPD2HDAC4HES1HSP90B1IFI16IL1R1IL6…	111	15	2.30973	0.00200459	0.0228911	526a643b-7fc4-511d-afb8-a625fc42ef33
PMC10228738	Co-cultures of colon cancer cells and cancer-associated fibroblasts recapitulate the aggressive features of mesenchymal-like colon cancer	Table_2.xlsx	DEG_Cluster6_caf-GENES	Click here for additional data file	1132	94	1.42055	0.000252524	0.00413295	922d0047-1d3b-5d5c-95c3-8995825b6adb
PMC10228738	Co-cultures of colon cancer cells and cancer-associated fibroblasts recapitulate the aggressive features of mesenchymal-like colon cancer	Table_2.xlsx	DEG_Cluster4_caf-GENES	Click here for additional data file	709	62	1.49676	0.000852374	0.011462	9e25fd01-05e5-5ab9-8629-546b40394307
PMC10228738	Co-cultures of colon cancer cells and cancer-associated fibroblasts recapitulate the aggressive features of mesenchymal-like colon cancer	Table_1.xlsx	GS_CAF_mono_culture-markers_CAF_mono	Click here for additional data file	300	30	1.71491	0.00272757	0.0293114	e3e3c684-3639-52ec-a01e-01915a13450b
PMC10228738	Co-cultures of colon cancer cells and cancer-associated fibroblasts recapitulate the aggressive features of mesenchymal-like colon cancer	Table_2.xlsx	DEG_Cluster5_caf-GENES	Click here for additional data file	732	61	1.42628	0.00290571	0.0308464	98a2193f-a744-5fcf-9083-5f336aec8b2c
PMC10238473	Sample size calculation for a NanoString GeoMx spatial transcriptomics experiment to study predictors of fibrosis progression in non-alcoholic fatty liver disease	41598_2023_36187_MOESM2_ESM.xlsx	Table_S1-Table_S1_Top_500_genes_with_enriched_expression_in_the_fibrotic_niche	cell types (mesenchymal, immune etc.) and hepatocyte fraction was enriched in hepatocyte markers (Tables **S1**) Supplementary Tables	479	63	2.24801	1.06108e-09	6.64748e-08	cf64ed5a-8a57-5ef6-8870-ab9f85bd0383
PMC10238473	Sample size calculation for a NanoString GeoMx spatial transcriptomics experiment to study predictors of fibrosis progression in non-alcoholic fatty liver disease	41598_2023_36187_MOESM2_ESM.xlsx	Table_S7-Unnamed_1	cell types (mesenchymal, immune etc.) and hepatocyte fraction was enriched in hepatocyte markers (Tables **S1**) Supplementary Tables	184	31	2.87963	8.92275e-08	3.70885e-06	2e9428ca-f8c8-5451-b4dd-cec65eb687c2
PMC10238473	Sample size calculation for a NanoString GeoMx spatial transcriptomics experiment to study predictors of fibrosis progression in non-alcoholic fatty liver disease	41598_2023_36187_MOESM2_ESM.xlsx	Table_S12-Table_S12_89_genes_from_Table_S7_that_were_annotated_with_at_least_1_GO_or_Reactome_term_related_to_cytoskeleton_biology	cell types (mesenchymal, immune etc.) and hepatocyte fraction was enriched in hepatocyte markers (Tables **S1**) Supplementary Tables	89	18	3.45681	3.18931e-06	9.15022e-05	1a0c6adb-1720-5c28-976f-4626dd5c42dc
PMC10257426	Prognostic association of immunoproteasome expression in solid tumours is governed by the immediate immune environment	MOL2-17-1041-s007.xlsx	Pathways_geneset-HALLMARK_UV_RESPONSE_DN	were obtained from Tan et al. [28]. These gene lists were given in Table **S3** Table S3. Gene list for 18 different immune cells, 50 different hallmark pathways, epithelial and mesenchymal gene signatures curated from different sources Click here for additional data file	144	31	3.67952	1.91406e-10	1.38791e-08	8eb61553-8184-5ae6-bc69-5fd71bb88020
PMC10257426	Prognostic association of immunoproteasome expression in solid tumours is governed by the immediate immune environment	MOL2-17-1041-s007.xlsx	Pathways_geneset-HALLMARK_INTERFERON_GAMMA_RESPONSE	were obtained from Tan et al. [28]. These gene lists were given in Table **S3** Table S3. Gene list for 18 different immune cells, 50 different hallmark pathways, epithelial and mesenchymal gene signatures curated from different sources Click here for additional data file	200	27	2.30742	4.14181e-05	0.000877629	306584cc-9f04-555c-9c59-87523724e2a6
PMC10257426	Prognostic association of immunoproteasome expression in solid tumours is governed by the immediate immune environment	MOL2-17-1041-s007.xlsx	Pathways_geneset-HALLMARK_KRAS_SIGNALING_UP	were obtained from Tan et al. [28]. These gene lists were given in Table **S3** Table S3. Gene list for 18 different immune cells, 50 different hallmark pathways, epithelial and mesenchymal gene signatures curated from different sources Click here for additional data file	200	26	2.22196	0.000107886	0.00200845	d026b43b-724d-5d8b-8cec-5914c9207998
PMC10257426	Prognostic association of immunoproteasome expression in solid tumours is governed by the immediate immune environment	MOL2-17-1041-s007.xlsx	Pathways_geneset-HALLMARK_MITOTIC_SPINDLE	were obtained from Tan et al. [28]. These gene lists were given in Table **S3** Table S3. Gene list for 18 different immune cells, 50 different hallmark pathways, epithelial and mesenchymal gene signatures curated from different sources Click here for additional data file	199	25	2.14723	0.000249244	0.00408606	abbb65e0-9615-5ad6-9d78-6c6bcd57fd6c
PMC10257426	Prognostic association of immunoproteasome expression in solid tumours is governed by the immediate immune environment	MOL2-17-1041-s007.xlsx	EMT_geneset-Mesenchymal_genes	were obtained from Tan et al. [28]. These gene lists were given in Table **S3** Table S3. Gene list for 18 different immune cells, 50 different hallmark pathways, epithelial and mesenchymal gene signatures curated from different sources Click here for additional data file	169	21	2.12386	0.0008737	0.0116626	01d862fb-aa55-5ada-989b-28157b28a887
PMC10257426	Prognostic association of immunoproteasome expression in solid tumours is governed by the immediate immune environment	MOL2-17-1041-s007.xlsx	Pathways_geneset-HALLMARK_ESTROGEN_RESPONSE_EARLY	were obtained from Tan et al. [28]. These gene lists were given in Table **S3** Table S3. Gene list for 18 different immune cells, 50 different hallmark pathways, epithelial and mesenchymal gene signatures curated from different sources Click here for additional data file	200	23	1.96558	0.00147383	0.017908	a66ee8d0-6d6f-575d-930b-53f3f3733ffe
PMC10257426	Prognostic association of immunoproteasome expression in solid tumours is governed by the immediate immune environment	MOL2-17-1041-s007.xlsx	Pathways_geneset-HALLMARK_INTERFERON_ALPHA_RESPONSE	were obtained from Tan et al. [28]. These gene lists were given in Table **S3** Table S3. Gene list for 18 different immune cells, 50 different hallmark pathways, epithelial and mesenchymal gene signatures curated from different sources Click here for additional data file	97	13	2.29068	0.00417852	0.0407537	a63e2858-8085-5347-940a-825fb4396fbd
PMC10265167	PD1hi CD200hi CD4+ exhausted T cell increase immunotherapy resistance and tumour progression by promoting epithelial–mesenchymal transition in bladder cancer	CTM2-13-e1303-s007.xlsx	Supplementaly_Table11-Supplementary_information_Table_S11_Siganature_genes_of_the_endothelial_cell_subcluster	distinct gene expression patterns were identified in the dataset (Figure 3H; Figure S4F; Table **S11**) Supporting Information Click here for additional data file	144	18	2.1365	0.00185428	0.0214645	6b747c13-8041-5ba7-ab00-430c8c34396f
PMC10275639	Identification of Paired-related Homeobox Protein 1 as a key mesenchymal transcription factor in pulmonary fibrosis	elife-79840-supp2.docx	0-GeneName	by TGF-β in control conditions (threshold: log2 fold change >2, adj. p-Value <0.05, see **Supplementary file 2**) Attenuation of the TGF-β response following PRRX1 knock-down.The table contains the best 597 genes significantly modulated by TGF-β in NHLF treated with siControl#1 and #2 (log2 fold change >4; adj. P Val <0.05). The table indicates the Fold Change (FC) for each of the genes: (i) colu…	459	52	1.94057	3.16085e-06	9.08163e-05	4cef34d6-04b1-5445-af99-d20df0c705b9
PMC10284927	Transcriptome changes during osteogenesis of porcine mesenchymal stem cells derived from different types of synovial membranes and genetic background	41598_2023_37260_MOESM1_ESM.xlsx	Table_S6-Unnamed_2	time point on day 1, day 7, day 14, and day 21 (Supplementary Table **S1**) Supplementary Tables	1174	158	2.30028	2.50796e-24	1.38759e-21	7034d66e-3600-5247-a790-e1d46c3150b4
PMC10284927	Transcriptome changes during osteogenesis of porcine mesenchymal stem cells derived from different types of synovial membranes and genetic background	41598_2023_37260_MOESM1_ESM.xlsx	Table_S4-Unnamed_2	time point on day 1, day 7, day 14, and day 21 (Supplementary Table **S1**) Supplementary Tables	429	64	2.54985	3.42964e-12	3.42081e-10	a71ad7a4-f18c-52b5-8c4c-5c5caa758d9a
PMC10291819	Adipose tissue-derived human mesenchymal stromal cells can better suppress complement lysis, engraft and inhibit acute graft-versus-host disease in mice	13287_2023_3380_MOESM11_ESM.pdf	3-C3orf80	expressed genes (> twofold) (Additional file 8: Fig. S4C, Additional files 9, 10 and **11**) Additional file 11: Table S6. List of Differentially expressed genes between AT-hMSCs and UC-hMSCs. Log2 FoldChange > 1 or < − 1, p-value < 0.05	33	8	4.14351	0.00049774	0.00733005	2ee369ae-78d9-50d7-908b-037aa32521e9
PMC10291819	Adipose tissue-derived human mesenchymal stromal cells can better suppress complement lysis, engraft and inhibit acute graft-versus-host disease in mice	13287_2023_3380_MOESM9_ESM.pdf	51-IQCA1	AT- versus BM-, AT- versus UC- and UC- versus BM-hMSCs revealed 2318 (7%), 2886 (**9**) Additional file 9: Table S4. List of Differentially expressed genes between AT-hMSCs and BM-hMSCs. Log2 FoldChange > 1 or < − 1, p-value < 0.05	28	7	4.273	0.000917202	0.0121382	c3f32c2b-b0d0-5fdd-80d3-d5f00f0d26be
PMC10291819	Adipose tissue-derived human mesenchymal stromal cells can better suppress complement lysis, engraft and inhibit acute graft-versus-host disease in mice	13287_2023_3380_MOESM10_ESM.pdf	52-RP4-668J24_2	(7%) differentially expressed genes (> twofold) (Additional file 8: Fig. S4C, Additional files 9, **10**) Additional file 10: Table S5. List of Differentially expressed genes between UC-hMSCsand BM-hMSCs. Log2 FoldChange > 1 or < − 1, p-value < 0.05	37	8	3.69556	0.00112426	0.0144053	f796fbc7-a832-5640-afac-3132af8455b7
PMC10291819	Adipose tissue-derived human mesenchymal stromal cells can better suppress complement lysis, engraft and inhibit acute graft-versus-host disease in mice	13287_2023_3380_MOESM10_ESM.pdf	50-NEK10	(7%) differentially expressed genes (> twofold) (Additional file 8: Fig. S4C, Additional files 9, **10**) Additional file 10: Table S5. List of Differentially expressed genes between UC-hMSCsand BM-hMSCs. Log2 FoldChange > 1 or < − 1, p-value < 0.05	32	7	3.73887	0.00212507	0.0240328	6269a4b0-762f-5866-b924-81888e65b166
PMC10291819	Adipose tissue-derived human mesenchymal stromal cells can better suppress complement lysis, engraft and inhibit acute graft-versus-host disease in mice	13287_2023_3380_MOESM10_ESM.pdf	15-SHROOM2	(7%) differentially expressed genes (> twofold) (Additional file 8: Fig. S4C, Additional files 9, **10**) Additional file 10: Table S5. List of Differentially expressed genes between UC-hMSCsand BM-hMSCs. Log2 FoldChange > 1 or < − 1, p-value < 0.05	32	7	3.73887	0.00212507	0.0240328	407fbf51-c3b2-5654-ba3a-626414c331e3
PMC10291819	Adipose tissue-derived human mesenchymal stromal cells can better suppress complement lysis, engraft and inhibit acute graft-versus-host disease in mice	13287_2023_3380_MOESM11_ESM.pdf	53-KNDC1	expressed genes (> twofold) (Additional file 8: Fig. S4C, Additional files 9, 10 and **11**) Additional file 11: Table S6. List of Differentially expressed genes between AT-hMSCs and UC-hMSCs. Log2 FoldChange > 1 or < − 1, p-value < 0.05	34	7	3.51894	0.00306731	0.0321505	af672b56-c979-5863-8b19-6040509a9cbc
PMC10291819	Adipose tissue-derived human mesenchymal stromal cells can better suppress complement lysis, engraft and inhibit acute graft-versus-host disease in mice	13287_2023_3380_MOESM9_ESM.pdf	47-ZNF702P	AT- versus BM-, AT- versus UC- and UC- versus BM-hMSCs revealed 2318 (7%), 2886 (**9**) Additional file 9: Table S4. List of Differentially expressed genes between AT-hMSCs and BM-hMSCs. Log2 FoldChange > 1 or < − 1, p-value < 0.05	35	7	3.4184	0.00364393	0.036725	b611df27-2cd6-5bc7-8304-948acce29868
PMC10291819	Adipose tissue-derived human mesenchymal stromal cells can better suppress complement lysis, engraft and inhibit acute graft-versus-host disease in mice	13287_2023_3380_MOESM9_ESM.pdf	37-CYP1B1	AT- versus BM-, AT- versus UC- and UC- versus BM-hMSCs revealed 2318 (7%), 2886 (**9**) Additional file 9: Table S4. List of Differentially expressed genes between AT-hMSCs and BM-hMSCs. Log2 FoldChange > 1 or < − 1, p-value < 0.05	35	7	3.4184	0.00364393	0.036725	ce7f3401-8c11-56d2-a474-d7376df5f96c
PMC10291819	Adipose tissue-derived human mesenchymal stromal cells can better suppress complement lysis, engraft and inhibit acute graft-versus-host disease in mice	13287_2023_3380_MOESM11_ESM.pdf	43-SMAD3	expressed genes (> twofold) (Additional file 8: Fig. S4C, Additional files 9, 10 and **11**) Additional file 11: Table S6. List of Differentially expressed genes between AT-hMSCs and UC-hMSCs. Log2 FoldChange > 1 or < − 1, p-value < 0.05	36	7	3.32344	0.00429932	0.0416965	37efb3f4-1636-522c-8063-76da155dbf38
PMC10291819	Adipose tissue-derived human mesenchymal stromal cells can better suppress complement lysis, engraft and inhibit acute graft-versus-host disease in mice	13287_2023_3380_MOESM10_ESM.pdf	55-LGI2	(7%) differentially expressed genes (> twofold) (Additional file 8: Fig. S4C, Additional files 9, **10**) Additional file 10: Table S5. List of Differentially expressed genes between UC-hMSCsand BM-hMSCs. Log2 FoldChange > 1 or < − 1, p-value < 0.05	36	7	3.32344	0.00429932	0.0416965	df3e1b21-6744-5422-b35d-afaf88541514
PMC10291819	Adipose tissue-derived human mesenchymal stromal cells can better suppress complement lysis, engraft and inhibit acute graft-versus-host disease in mice	13287_2023_3380_MOESM10_ESM.pdf	57-RNF212	(7%) differentially expressed genes (> twofold) (Additional file 8: Fig. S4C, Additional files 9, **10**) Additional file 10: Table S5. List of Differentially expressed genes between UC-hMSCsand BM-hMSCs. Log2 FoldChange > 1 or < − 1, p-value < 0.05	28	6	3.66257	0.0048934	0.0463436	db2c6f2c-d438-527c-abc6-94602162c3f7
PMC10293285	Single-cell transcriptomics and epigenomics unravel the role of monocytes in neuroblastoma bone marrow metastasis	41467_2023_39210_MOESM9_ESM.xlsx	erythroid_lineage_cell-Pathway	and epithelial to mesenchymal transition signatures (Fig. 4c, d, Supplementary Fig. 4c, Supplementary Data **5**) Supplementary Dataset 5	271	34	2.14438	2.13268e-05	0.000491918	adffcf15-fc74-5594-bc4d-5d0a4177fb0e
PMC10293285	Single-cell transcriptomics and epigenomics unravel the role of monocytes in neuroblastoma bone marrow metastasis	41467_2023_39210_MOESM9_ESM.xlsx	T_cell-Pathway	and epithelial to mesenchymal transition signatures (Fig. 4c, d, Supplementary Fig. 4c, Supplementary Data **5**) Supplementary Dataset 5	265	33	2.12844	3.26818e-05	0.000713724	50ba3c0c-268c-587a-89a1-14442d11feb1
PMC10293285	Single-cell transcriptomics and epigenomics unravel the role of monocytes in neuroblastoma bone marrow metastasis	41467_2023_39210_MOESM9_ESM.xlsx	B_cell-Unnamed_2	and epithelial to mesenchymal transition signatures (Fig. 4c, d, Supplementary Fig. 4c, Supplementary Data **5**) Supplementary Dataset 5	269	33	2.09679	4.41899e-05	0.000929378	35b3c755-5a99-5f6e-b82b-53f3e3f3a0ce
PMC10293285	Single-cell transcriptomics and epigenomics unravel the role of monocytes in neuroblastoma bone marrow metastasis	41467_2023_39210_MOESM9_ESM.xlsx	plasmacytoid_dendritic_cell-Pathway	and epithelial to mesenchymal transition signatures (Fig. 4c, d, Supplementary Fig. 4c, Supplementary Data **5**) Supplementary Dataset 5	270	33	2.08902	4.75901e-05	0.000990452	6f7a4a3a-a8aa-5869-9200-cafadb994a76
PMC10293285	Single-cell transcriptomics and epigenomics unravel the role of monocytes in neuroblastoma bone marrow metastasis	41467_2023_39210_MOESM9_ESM.xlsx	natural_killer_cell-Pathway	and epithelial to mesenchymal transition signatures (Fig. 4c, d, Supplementary Fig. 4c, Supplementary Data **5**) Supplementary Dataset 5	262	32	2.08757	6.25202e-05	0.00125547	a75075ba-42ee-5c4c-be3d-f0ef64d661e4
PMC10293285	Single-cell transcriptomics and epigenomics unravel the role of monocytes in neuroblastoma bone marrow metastasis	41467_2023_39210_MOESM9_ESM.xlsx	hematopoietic_precursor_cell-Pathway	and epithelial to mesenchymal transition signatures (Fig. 4c, d, Supplementary Fig. 4c, Supplementary Data **5**) Supplementary Dataset 5	274	33	2.05852	6.36934e-05	0.00127474	caab27bf-8995-5273-a7c1-06619494a08b
PMC10293285	Single-cell transcriptomics and epigenomics unravel the role of monocytes in neuroblastoma bone marrow metastasis	41467_2023_39210_MOESM9_ESM.xlsx	myeloid_cell-Pathway	and epithelial to mesenchymal transition signatures (Fig. 4c, d, Supplementary Fig. 4c, Supplementary Data **5**) Supplementary Dataset 5	274	33	2.05852	6.36934e-05	0.00127474	30c68b67-c645-55f3-850f-940275d838ad
PMC10293285	Single-cell transcriptomics and epigenomics unravel the role of monocytes in neuroblastoma bone marrow metastasis	41467_2023_39210_MOESM9_ESM.xlsx	neuroblastoma_cell-Pathway	and epithelial to mesenchymal transition signatures (Fig. 4c, d, Supplementary Fig. 4c, Supplementary Data **5**) Supplementary Dataset 5	275	33	2.05104	6.84225e-05	0.00135633	fcb7803f-0608-527f-aad6-8d9a31ed13d9
PMC10320877	Methylmalonic acid promotes colorectal cancer progression via activation of Wnt/β-catenin pathway mediated epithelial–mesenchymal transition	12935_2023_2973_MOESM2_ESM.xlsx	Sheet1-Gene_ID	including FZD3, DKK1, PRKCA and FZD4, which was validated by qPCR assay (Additional file **2**) Additional file 2: Table S3. Differentially expressed genes of HCT116 cells treated with vehicle and 5mM MMA for 10 days	61	11	3.08216	0.000730027	0.0100549	94dce33e-7ce7-51f3-bf22-82a8d6284976
PMC10320877	Methylmalonic acid promotes colorectal cancer progression via activation of Wnt/β-catenin pathway mediated epithelial–mesenchymal transition	12935_2023_2973_MOESM2_ESM.xlsx	Sheet1-Gene_name	including FZD3, DKK1, PRKCA and FZD4, which was validated by qPCR assay (Additional file **2**) Additional file 2: Table S3. Differentially expressed genes of HCT116 cells treated with vehicle and 5mM MMA for 10 days	61	11	3.08216	0.000730027	0.0100549	94dce33e-7ce7-51f3-bf22-82a8d6284976
PMC10328386	Sustained complete response to first-line immunochemotherapy for highly aggressive TP53/MDM2-mutated upper tract urothelial carcinoma with ERBB2 mutations, luminal immune-infiltrated contexture, and non-mesenchymal state: a case report and literature review	DataSheet_1.pdf	1-MAP3K13	KDM6A, KMT2D, AT-rich interactive domain-containing protein 1A (ARID1A), and mismatch repair gene MLH1 ( **Supplementary Tables S1, S2**) Click here for additional data file	38	8	3.59831	0.00135208	0.0167035	ae6dc3c6-4594-52d5-848d-6559fd7248ab
PMC10355222	Metronomic Administration of Topotecan Alone and in Combination with Docetaxel Inhibits Epithelial–mesenchymal Transition in Aggressive Variant Prostate Cancers	crc-22-0427-s02.docx	7-Gene_Expression_in_Single_Cell_RNA_sequencing_mCRPC_NEPC_ARLow_vs_mCSPC_ARHigh_FDR_0_05_	treated with estimated MTT IC50, IC50/2 for CONV-DTX and MTT IC50, IC50/2 for METRO-TOPO (**Supplementary Table S5**) Supplementary Tables Click here for additional data file	568	69	2.07631	4.93567e-09	2.7116e-07	49c2b241-5e2f-5fa2-b1e9-5fbf36277468
PMC10355222	Metronomic Administration of Topotecan Alone and in Combination with Docetaxel Inhibits Epithelial–mesenchymal Transition in Aggressive Variant Prostate Cancers	crc-22-0427-s02.docx	7-Gene_Expression_in_RNA_sequencing_mCRPC_NEPC_ARLow_vs_mCSPC_ARHigh_FDR_0_05_	treated with estimated MTT IC50, IC50/2 for CONV-DTX and MTT IC50, IC50/2 for METRO-TOPO (**Supplementary Table S5**) Supplementary Tables Click here for additional data file	139	23	2.82817	5.52201e-06	0.000149275	c9db2437-dfba-57b1-812d-6bd4daa09e65
PMC10355222	Metronomic Administration of Topotecan Alone and in Combination with Docetaxel Inhibits Epithelial–mesenchymal Transition in Aggressive Variant Prostate Cancers	crc-22-0427-s02.docx	7-Common_DEGs_among_RNA_sequencing_and_Single_Cell_RNA_sequencing_mCRPC_NEPC_ARLow_vs_mCSPC_ARHigh_FDR_0_05_	treated with estimated MTT IC50, IC50/2 for CONV-DTX and MTT IC50, IC50/2 for METRO-TOPO (**Supplementary Table S5**) Supplementary Tables Click here for additional data file	70	14	3.4184	4.44796e-05	0.000934693	2714aada-f35b-50c2-8475-4506a7c6bf73
PMC10355222	Metronomic Administration of Topotecan Alone and in Combination with Docetaxel Inhibits Epithelial–mesenchymal Transition in Aggressive Variant Prostate Cancers	crc-22-0427-s02.docx	5-Gene_Name	treated with estimated MTT IC50, IC50/2 for CONV-DTX and MTT IC50, IC50/2 for METRO-TOPO (**Supplementary Table S5**) Supplementary Tables Click here for additional data file	100	17	2.90564	6.3493e-05	0.00127137	f9533cae-1a28-57db-a2dd-fadcc0a425c0
PMC10355222	Metronomic Administration of Topotecan Alone and in Combination with Docetaxel Inhibits Epithelial–mesenchymal Transition in Aggressive Variant Prostate Cancers	crc-22-0427.pdf	2-GENE		51	11	3.68651	0.000142016	0.0025368	614fccf8-92e3-5131-b2fe-56fd819b2f8d
PMC10355222	Metronomic Administration of Topotecan Alone and in Combination with Docetaxel Inhibits Epithelial–mesenchymal Transition in Aggressive Variant Prostate Cancers	crc-22-0427-s02.docx	6-Gene_Name	treated with estimated MTT IC50, IC50/2 for CONV-DTX and MTT IC50, IC50/2 for METRO-TOPO (**Supplementary Table S5**) Supplementary Tables Click here for additional data file	96	13	2.31454	0.00381759	0.0381412	c873121e-7e55-55e7-90a5-b92cc3d8148b
PMC10359415	Multi-omics analysis of human mesenchymal stem cells shows cell aging that alters immunomodulatory activity through the downregulation of PD-L1	41467_2023_39958_MOESM4_ESM.xlsx	Supplementary_Data_3-Unnamed_94	clinical research and therapy follows the criteria published by the International Society for Cellular Therapy**1** Supplementary Data 1–13	12	4	5.69733	0.00394414	0.0391193	2b37b9a4-860e-5427-ac8f-84a6c23d0e4e
PMC10362506	Single-cell analysis of human fetal epicardium reveals its cellular composition and identifies CRIP1 as a modulator of EMT	mmc4.xlsx	Epi_vs_Mes-Table_S3_	also less reported ones such as SULF1, CRIP1, AQP1, and C3 (Figure 3A and **Table S3**) Table S3. Differentially expressed genes between epithelial and mesenchymal populations	834	91	1.86495	3.88301e-09	2.17551e-07	9ae7bc15-1c44-5b62-b304-9e03e6569630
PMC10362506	Single-cell analysis of human fetal epicardium reveals its cellular composition and identifies CRIP1 as a modulator of EMT	mmc4.xlsx	Mes_vs_Epi-Unnamed_0	also less reported ones such as SULF1, CRIP1, AQP1, and C3 (Figure 3A and **Table S3**) Table S3. Differentially expressed genes between epithelial and mesenchymal populations	456	53	1.98657	1.25396e-06	3.97716e-05	138d6eb6-bf42-55e2-a019-764d81385506
PMC10491309	Endonucleolytic RNA cleavage drives changes in gene expression during the innate immune response	media-3.xlsx	complete_list_IFN-full_Hallmark_dataset_Interferon_gamma	3.0 84 that were based on Gene References Into Function (GeneRIFs, JNK, p38 datasets, **Table S3**)	97	13	2.29068	0.00417852	0.0407537	a63e2858-8085-5347-940a-825fb4396fbd
PMC10510228	Expansion of human bone marrow-derived mesenchymal stromal cells with enhanced immunomodulatory properties	13287_2023_3481_MOESM7_ESM.xlsx	DEGs-Supplemental_Table_1	magnitude fold change of > 2.0 and false discovery rate ≤ 0.05 (Additional file **7**) Additional file 7: Supplemental Table 1. Differentially expressed genes (DEGs) in bone marrow-derived MSCs from six human donors, cultured at high confluency (MSC-HC) versus low confluency (MSC-LC)	1597	142	1.51976	1.10098e-07	4.47891e-06	296399ab-60ca-5115-9a91-a66085b9f325
PMC10510228	Expansion of human bone marrow-derived mesenchymal stromal cells with enhanced immunomodulatory properties	13287_2023_3481_MOESM7_ESM.xlsx	DEGs-Differentially_expressed_genes_DEGs_in_bone_marrow-derived_MSCs_from_six_human_donors_cultured_at_high_confluency_MSC-HC_versus_low_confluency_MSC-LC	magnitude fold change of > 2.0 and false discovery rate ≤ 0.05 (Additional file **7**) Additional file 7: Supplemental Table 1. Differentially expressed genes (DEGs) in bone marrow-derived MSCs from six human donors, cultured at high confluency (MSC-HC) versus low confluency (MSC-LC)	1599	142	1.51881	1.14299e-07	4.63216e-06	5fcb2c98-487c-5051-9a46-90da7d027cf3
PMC10510228	Expansion of human bone marrow-derived mesenchymal stromal cells with enhanced immunomodulatory properties	13287_2023_3481_MOESM8_ESM.xlsx	731_DEG-Supplemental_Table_2	both groups, we identified 731 DEGs that are unique to the responders (Additional file **8**) Additional file 8: Supplemental Table 2. Differentially expressed genes (DEGs) in bone marrow-derived MSCs unique to responders (Donor 1, Donor 2, Donor 4, Donor 5), cultured at high confluency (MSC-HC) versus low confluency (MSC-LC)	579	66	1.94831	1.25017e-07	5.0193e-06	afd49004-0e7f-5466-a87d-5f7361190f32
PMC10511504	A CCL2+DPP4+ subset of mesenchymal stem cells expedites aberrant formation of creeping fat in humans	41467_2023_41418_MOESM4_ESM.xlsx	Supplementary_Data_21-Unnamed_6	rather than continuous, with extended finger-like projections gripping the diseased segments of intestine (Fig. **1**) Supplementary Data 1-22	1839	254	2.36072	1.17084e-42	3.73163e-39	0f845a3b-b136-50bd-9986-9f4918631d56
PMC10511504	A CCL2+DPP4+ subset of mesenchymal stem cells expedites aberrant formation of creeping fat in humans	41467_2023_41418_MOESM4_ESM.xlsx	Supplementary_Data_17_1-Unnamed_3	rather than continuous, with extended finger-like projections gripping the diseased segments of intestine (Fig. **1**) Supplementary Data 1-22	903	128	2.42278	1.31155e-21	5.35736e-19	e5c4ed9f-f21a-59f5-9a1e-70482f6bcc7d
PMC10511504	A CCL2+DPP4+ subset of mesenchymal stem cells expedites aberrant formation of creeping fat in humans	41467_2023_41418_MOESM4_ESM.xlsx	Supplementary_Data_22-Unnamed_6	rather than continuous, with extended finger-like projections gripping the diseased segments of intestine (Fig. **1**) Supplementary Data 1-22	1337	157	2.00706	3.07652e-18	7.98926e-16	89b48f27-2504-5561-92ae-304dc0170055
PMC10511504	A CCL2+DPP4+ subset of mesenchymal stem cells expedites aberrant formation of creeping fat in humans	41467_2023_41418_MOESM4_ESM.xlsx	Supplementary_Data_19-Unnamed_6	rather than continuous, with extended finger-like projections gripping the diseased segments of intestine (Fig. **1**) Supplementary Data 1-22	1023	110	1.83785	1.7645e-10	1.28932e-08	b83fa698-ff93-55df-98c5-230723ddc517
PMC10511504	A CCL2+DPP4+ subset of mesenchymal stem cells expedites aberrant formation of creeping fat in humans	41467_2023_41418_MOESM4_ESM.xlsx	Supplementary_Data_17_1-Unnamed_1	rather than continuous, with extended finger-like projections gripping the diseased segments of intestine (Fig. **1**) Supplementary Data 1-22	651	76	1.99538	4.64961e-09	2.56596e-07	3ba7699e-f76a-5133-b000-0861f1b3832e
PMC10511504	A CCL2+DPP4+ subset of mesenchymal stem cells expedites aberrant formation of creeping fat in humans	41467_2023_41418_MOESM4_ESM.xlsx	Supplementary_Data_14-Unnamed_6	rather than continuous, with extended finger-like projections gripping the diseased segments of intestine (Fig. **1**) Supplementary Data 1-22	1093	92	1.43867	0.000192124	0.00327205	69dd46b5-954c-537c-9e26-584739c7bf63
PMC10515776	Developmental pyrethroid exposure disrupts molecular pathways for circadian rhythms and synaptic plasticity in mouse brain	media-1.xlsx	1B_CHEA-TF	and circadian-associated repressor of transcription (CIART, Log2FC = −0.42, p = 0.042) (Figure 1A, **Supplementary File 1A**)	1609	136	1.44469	3.47613e-06	9.8871e-05	b94103e7-6fb5-5429-8416-113e251632f8
PMC10529385	Stromal-induced epithelial-mesenchymal transition induces targetable drug resistance in acute lymphoblastic leukemia	NIHMS1920517-supplement-2.xlsx	Table_S1-Gene	Nonadh ALL cells (2,107 upregulated and 31 downregulated; log2(Adh/Nonadh) > 1; FDR < 0.05; **Table S1**	1973	207	1.79414	1.61748e-18	4.37096e-16	3dd9d0ac-4285-5602-b3e4-8f64d66cb247
PMC10534007	Tumorigenic effects of human mesenchymal stromal cells and fibroblasts on bladder cancer cells	Table_2.xlsx	S12_unique_down_FB_B-1390_elements_included_exclusively_in_BFTC905_Fib_dow	or VMCUB-1 cells were also subjected to GO analysis ( Additional Files 8 , **9A–E**) Identification of DEGs unique for either MSC-CM or FB-CM in VMCUB-1. Unique genes for the respective treatment group were identified by Venn diagram (A) and subjected to GO analysis. Uniquely affected DEGs by FB-CM (B, C) and by MSC-CM (D, E) are displayed Click here for additional data file	1293	142	1.87853	4.04206e-14	5.64042e-12	58479e0f-21b4-5d88-bbd8-c5e8cda86564
PMC10534007	Tumorigenic effects of human mesenchymal stromal cells and fibroblasts on bladder cancer cells	Table_3.xlsx	S2_unique_down_FB_B-708_elements_included_exclusively_in_BFTC905_Fib_down	cells were also subjected to GO analysis ( Additional Files 8 , 9A–E , **10**) Lists of unique DEGs corresponding with analyses displayed in Additional Files 8 , 9 Click here for additional data file	624	74	2.02693	3.8182e-09	2.14284e-07	3fc1a38c-50c3-53e3-900b-ce169c64fe5d
PMC10534007	Tumorigenic effects of human mesenchymal stromal cells and fibroblasts on bladder cancer cells	Table_3.xlsx	S2_unique_down_FB_B_2-708_elements_included_exclusively_in_BFTC905_Fib_down	cells were also subjected to GO analysis ( Additional Files 8 , 9A–E , **10**) Lists of unique DEGs corresponding with analyses displayed in Additional Files 8 , 9 Click here for additional data file	624	74	2.02693	3.8182e-09	2.14284e-07	3fc1a38c-50c3-53e3-900b-ce169c64fe5d
PMC10534007	Tumorigenic effects of human mesenchymal stromal cells and fibroblasts on bladder cancer cells	Table_2.xlsx	S6_unique_down_MSC_B-914_elements_included_exclusively_in_BFTC905_MSC_down	or VMCUB-1 cells were also subjected to GO analysis ( Additional Files 8 , **9A–E**) Identification of DEGs unique for either MSC-CM or FB-CM in VMCUB-1. Unique genes for the respective treatment group were identified by Venn diagram (A) and subjected to GO analysis. Uniquely affected DEGs by FB-CM (B, C) and by MSC-CM (D, E) are displayed Click here for additional data file	878	87	1.69556	6.22733e-07	2.12148e-05	355eaccf-ff05-511e-8768-367ea44e816f
PMC10534007	Tumorigenic effects of human mesenchymal stromal cells and fibroblasts on bladder cancer cells	Table_2.xlsx	S7_overlap_FB_up_B_V-518_common_elements_in_BFTC905_Fib_up_and_VM-CUB1_Fib_up	or VMCUB-1 cells were also subjected to GO analysis ( Additional Files 8 , **9A–E**) Identification of DEGs unique for either MSC-CM or FB-CM in VMCUB-1. Unique genes for the respective treatment group were identified by Venn diagram (A) and subjected to GO analysis. Uniquely affected DEGs by FB-CM (B, C) and by MSC-CM (D, E) are displayed Click here for additional data file	470	42	1.52737	0.00396881	0.0391929	ae518eb3-2ee7-5290-8222-7500dbbf5624
PMC10534007	Tumorigenic effects of human mesenchymal stromal cells and fibroblasts on bladder cancer cells	Table_2.xlsx	S10_unique_down_FB_V-591_elements_included_exclusively_in_VM-CUB1_Fib_down	or VMCUB-1 cells were also subjected to GO analysis ( Additional Files 8 , **9A–E**) Identification of DEGs unique for either MSC-CM or FB-CM in VMCUB-1. Unique genes for the respective treatment group were identified by Venn diagram (A) and subjected to GO analysis. Uniquely affected DEGs by FB-CM (B, C) and by MSC-CM (D, E) are displayed Click here for additional data file	520	45	1.47911	0.00526109	0.0490614	30126140-0e01-5011-a022-89bbd1b03d51
PMC10564744	Positive regulation of oxidative phosphorylation by nuclear myosin 1 protects cells from metabolic reprogramming and tumorigenesis in mice	41467_2023_42093_MOESM7_ESM.xlsx	Sheet1-HM_UV_response_down_144_TJP1	Supplementary Data 4	144	31	3.67952	1.91406e-10	1.38791e-08	8eb61553-8184-5ae6-bc69-5fd71bb88020
PMC10564744	Positive regulation of oxidative phosphorylation by nuclear myosin 1 protects cells from metabolic reprogramming and tumorigenesis in mice	41467_2023_42093_MOESM7_ESM.xlsx	Sheet1-HM_KRAS_signaling_up_200_ANGPTL4	Supplementary Data 4	200	26	2.22196	0.000107886	0.00200845	d026b43b-724d-5d8b-8cec-5914c9207998
PMC10576371	EGCG inhibits the inflammation and senescence inducing properties of MDA-MB-231 triple-negative breast cancer (TNBC) cells-derived extracellular vesicles in human adipose-derived mesenchymal stem cells	12935_2023_3087_MOESM5_ESM.csv	Alias	Next, we performed a k-means clustering analysis with the **5** Additional file 5. Analysis of the 553 DEG and of the two major clusters identified	2228	202	1.55172	1.17622e-11	1.06165e-09	a09c929b-c1c4-5f9f-a459-816443468e77
PMC10583486	The HIFIA/LINC02913/IGF1R axis promotes the cell function of adipose-derived mesenchymal stem cells under hypoxia via activating the PI3K/AKT pathway	12967_2023_4581_MOESM2_ESM.docx	3-Protein	The full length of LINC0**2** Additional file 2. Supplementary Table S1–5	115	15	2.22939	0.00284586	0.0303299	be0f9be8-5539-562a-adc4-de88acaaf503
PMC10598070	FOXQ1 promotes pancreatic cancer cell proliferation, tumor stemness, invasion and metastasis through regulation of LDHA-mediated aerobic glycolysis	41419_2023_6207_MOESM2_ESM.xlsx	Sheet1-Unnamed_1	The EMT-related dataset (Supplementary Table **1**) Supplementary Table 1	1011	101	1.70751	4.94491e-08	2.17827e-06	cc5ebe44-1870-5bfe-9e36-86a81de98dd4
PMC10624284	Human dermal fibroblast subpopulations and epithelial mesenchymal transition signals in hidradenitis suppurativa tunnels are normalized by spleen tyrosine kinase antagonism in vivo	pone.0282763.s007.docx	0-Gene	(DOCX) Click here for additional data file	754	76	1.7228	1.86472e-06	5.68129e-05	1df58e43-22b1-5c2d-976a-5a3bebf6d7b6
PMC10624284	Human dermal fibroblast subpopulations and epithelial mesenchymal transition signals in hidradenitis suppurativa tunnels are normalized by spleen tyrosine kinase antagonism in vivo	pone.0282763.s006.xls	Supp_Table_4_FCH_nanostring-Probe_Name	4 in lesional HS tissue compared with baseline (Week 0) (Fig 5a and 5b, **S4 Table**) Differentially expressed genes in Nanostring gene expression panel.(XLS) Click here for additional data file	201	24	2.04083	0.000692128	0.00963459	f3ee5e8f-2ba8-5075-9774-21f8afee6b84
PMC10633927	Unraveling temporal and spatial biomarkers of epithelial-mesenchymal transition in colorectal cancer: insights into the crucial role of immunosuppressive cells	12967_2023_4600_MOESM13_ESM.xlsx	TableS13-Table_S13_Stage_III_Differential_Genes	used to distinguish tumor cells from normal epithelial cells and immune cells (Additional file **13**) Additional file 13: Stage III Differential Genes	656	68	1.77173	2.57226e-06	7.55885e-05	2bca09e1-4d3e-5f63-8f1c-9a7f721806ca
PMC10633927	Unraveling temporal and spatial biomarkers of epithelial-mesenchymal transition in colorectal cancer: insights into the crucial role of immunosuppressive cells	12967_2023_4600_MOESM13_ESM.xlsx	TableS13-Unnamed_5	used to distinguish tumor cells from normal epithelial cells and immune cells (Additional file **13**) Additional file 13: Stage III Differential Genes	656	68	1.77173	2.57226e-06	7.55885e-05	2bca09e1-4d3e-5f63-8f1c-9a7f721806ca
PMC10633927	Unraveling temporal and spatial biomarkers of epithelial-mesenchymal transition in colorectal cancer: insights into the crucial role of immunosuppressive cells	12967_2023_4600_MOESM13_ESM.xlsx	TableS12-Table_S11_Stage_I_II_Differential_Genes	used to distinguish tumor cells from normal epithelial cells and immune cells (Additional file **13**) Additional file 13: Stage III Differential Genes	658	67	1.74037	5.58722e-06	0.000150823	beb4aab6-b717-5701-a231-735b99b14cc4
PMC10633927	Unraveling temporal and spatial biomarkers of epithelial-mesenchymal transition in colorectal cancer: insights into the crucial role of immunosuppressive cells	12967_2023_4600_MOESM13_ESM.xlsx	TableS12-Unnamed_5	used to distinguish tumor cells from normal epithelial cells and immune cells (Additional file **13**) Additional file 13: Stage III Differential Genes	658	67	1.74037	5.58722e-06	0.000150823	beb4aab6-b717-5701-a231-735b99b14cc4
PMC10660609	Inhibitory role of bone marrow mesenchymal stem cells‐derived exosome in non‐small‐cell lung cancer: microRNA‐30b‐5p, EZH2 and PI3K/AKT pathway	JCMM-27-3526-s008.xlsx	Sheet1-Table_S5_567_intersected_target_genes	differential analysis in GEO microarray data, yielding 567 intersected target genes (Figure 2H; Table **S5**) Table S5 Click here for additional data file	561	83	2.52876	2.76357e-15	4.63266e-13	42acaa9d-bf02-5b18-b4f2-c01ca73d0bd6
PMC10660609	Inhibitory role of bone marrow mesenchymal stem cells‐derived exosome in non‐small‐cell lung cancer: microRNA‐30b‐5p, EZH2 and PI3K/AKT pathway	JCMM-27-3526-s008.xlsx	Sheet1-Unnamed_1	differential analysis in GEO microarray data, yielding 567 intersected target genes (Figure 2H; Table **S5**) Table S5 Click here for additional data file	19	5	4.49789	0.00395797	0.0391193	f1c29c76-8823-54c9-a5fc-6b121f30c915
PMC10667257	The extrafollicular B cell response is a hallmark of childhood idiopathic nephrotic syndrome	41467_2023_43504_MOESM7_ESM.xlsx	ChEA3_Nephrotic_B_signature-TF	cell signature using the web-based transcription factor enrichment analysis tool ChIP-X Enrichment Analysis 3 (ChEA3)**4** Supplementary Data 4	1609	136	1.44469	3.47613e-06	9.8871e-05	b94103e7-6fb5-5429-8416-113e251632f8
PMC10667838	FBXO7 Confers Mesenchymal Properties and Chemoresistance in Glioblastoma by Controlling Rbfox2‐Mediated Alternative Splicing	ADVS-10-2303561-s005.xlsx	SE_sig_AS_events-geneSymbol	Supplemental Table 3 Click here for additional data file	835	74	1.51474	0.000189203	0.00323918	3135e3cc-0a99-555a-a94c-9d5b57dff245
PMC10689956	Dual role of CASP8AP2/FLASH in regulating epithelial-to-mesenchymal transition plasticity (EMP)	mmc10.xlsx	Sheet1-Symbol		2078	168	1.3825	2.69069e-06	7.87211e-05	6e932399-7038-5a79-8ffc-7b1058251585
PMC10689956	Dual role of CASP8AP2/FLASH in regulating epithelial-to-mesenchymal transition plasticity (EMP)	mmc11.xlsx	Sheet1-Symbol		2140	161	1.28649	0.000205169	0.00346899	59f20c3a-0e91-5371-9c3c-feef32f03d92
PMC10694981	Decoding the mitochondrial connection: development and validation of biomarkers for classifying and treating systemic lupus erythematosus through bioinformatics and machine learning	41927_2023_369_MOESM4_ESM.xlsx	Sheet1-TF	(Fig. 8A). As a result, there were 316 intersecting transcription factors enriched (Supplementary Data **S4**) Supplementary Data S4: TF Enrichment Analysis Results for Hub Genes	1609	136	1.44469	3.47613e-06	9.8871e-05	b94103e7-6fb5-5429-8416-113e251632f8
PMC10709330	The functional and molecular impact of triamcinolone acetonide on primary human bone marrow mesenchymal stem cells	41598_2023_48448_MOESM1_ESM.xlsx	top_50_altered_gene_list_TA_10u-NAME	The genes that were altered dramatically (P values < 0.05 and log2fold changes > **1**) Supplementary Information 1	187	31	2.83343	1.30177e-07	5.20422e-06	6afcf4d1-435e-5c44-ac03-08a241f78edc
PMC10716775	Exosomal miR-23a-3p derived from human umbilical cord mesenchymal stem cells promotes remyelination in central nervous system demyelinating diseases by targeting Tbr1/Wnt pathway	mmc3.xlsx	miRDB-Gene_Symbol	Table S3	1450	132	1.55596	9.07193e-08	3.76405e-06	d7b74262-8eaf-52cb-b0d8-5e75fd13c432
PMC10725030	A novel patient-derived meningioma spheroid model as a tool to study and treat epithelial-to-mesenchymal transition (EMT) in meningiomas	40478_2023_1677_MOESM3_ESM.xlsx	DEG_3D_compared_to_2D-gene_id	Elucidating the differences between the two cell culture models (2D and **3**) Additional file 3. List of significantly deregulated genes (DEG) between 3D and 2D, 3D and Tissue and 2D and Tissue	1343	112	1.42539	5.22699e-05	0.00107412	ca86a86c-e96b-5324-a710-0e9cc686e5f1
PMC10725030	A novel patient-derived meningioma spheroid model as a tool to study and treat epithelial-to-mesenchymal transition (EMT) in meningiomas	40478_2023_1677_MOESM3_ESM.xlsx	DEG_3D_compared_to_2D-gene_name	Elucidating the differences between the two cell culture models (2D and **3**) Additional file 3. List of significantly deregulated genes (DEG) between 3D and 2D, 3D and Tissue and 2D and Tissue	1347	112	1.42222	5.73106e-05	0.00116551	5df1e5d0-5d23-5c68-8d18-5c92882f03b3
PMC10726128	Identification of a core EMT signature that separates basal-like breast cancers into partial- and post-EMT subtypes	Table_1.xlsx	Supplementary_Table_4-Identifier	are “UV-response down”, “KRAS signaling up”, and “Epithelial Mesenchymal Transition” ( Figure 5A , **Supplementary Table 7**) Complete list of enriched hallmarks identified by Gene Set Enrichment Analysis results from comparing basal-like breast cancers clustering either as EMT-up or partial-EMT in TCGA and Metabric Click here for additional data file	260	29	1.90641	0.000629249	0.00889958	a9e52072-6f07-5be7-86e3-1cabfa2a32f5
PMC10726128	Identification of a core EMT signature that separates basal-like breast cancers into partial- and post-EMT subtypes	Table_1.xlsx	Supplementary_Table_6-Identifier	are “UV-response down”, “KRAS signaling up”, and “Epithelial Mesenchymal Transition” ( Figure 5A , **Supplementary Table 7**) Complete list of enriched hallmarks identified by Gene Set Enrichment Analysis results from comparing basal-like breast cancers clustering either as EMT-up or partial-EMT in TCGA and Metabric Click here for additional data file	260	29	1.90641	0.000629249	0.00889958	a9e52072-6f07-5be7-86e3-1cabfa2a32f5
PMC10726128	Identification of a core EMT signature that separates basal-like breast cancers into partial- and post-EMT subtypes	Table_1.xlsx	Supplementary_Table_4-Name	are “UV-response down”, “KRAS signaling up”, and “Epithelial Mesenchymal Transition” ( Figure 5A , **Supplementary Table 7**) Complete list of enriched hallmarks identified by Gene Set Enrichment Analysis results from comparing basal-like breast cancers clustering either as EMT-up or partial-EMT in TCGA and Metabric Click here for additional data file	260	29	1.90641	0.000629249	0.00889958	94bbc945-73e7-5cab-87f8-37e99b9f58bc
PMC10726128	Identification of a core EMT signature that separates basal-like breast cancers into partial- and post-EMT subtypes	Table_1.xlsx	Supplementary_Table_6-Name	are “UV-response down”, “KRAS signaling up”, and “Epithelial Mesenchymal Transition” ( Figure 5A , **Supplementary Table 7**) Complete list of enriched hallmarks identified by Gene Set Enrichment Analysis results from comparing basal-like breast cancers clustering either as EMT-up or partial-EMT in TCGA and Metabric Click here for additional data file	260	29	1.90641	0.000629249	0.00889958	94bbc945-73e7-5cab-87f8-37e99b9f58bc
PMC10758337	Role of the Ste20‐like kinase SLK in podocyte adhesion	PHY2-12-e15897-s002.xlsx	Input_FA_KEGG-Unnamed_3	being SLK phosphorylation motifs, potential SLK phosphorylation sites were identified in 4352 proteins (Table **S1**) Table S1 Click here for additional data file	203	22	1.85233	0.00385949	0.0384909	db2bed29-54d6-5196-91e9-44c1d3edce72
PMC10795782	Mutually exclusive teams-like patterns of gene regulation characterize phenotypic heterogeneity along the noradrenergic-mesenchymal axis in neuroblastoma	KCBT_A_2301802_SM6771.xlsx	Table_S2-Genesets-MES		482	48	1.70211	0.000205353	0.00347155	2b808f2d-29ed-58b5-a50a-022bf3ecd694
PMC10799929	Truncated O-glycosylation in metastatic triple-negative breast cancer reveals a gene expression signature associated with extracellular matrix and proteolysis	41598_2024_52204_MOESM4_ESM.xlsx	Supplmentary_Table_4-Unnamed_1		1609	136	1.44469	3.47613e-06	9.8871e-05	b94103e7-6fb5-5429-8416-113e251632f8
PMC10803731	Compartment-specific multiomic profiling identifies SRC and GNAS as candidate drivers of epithelial-to-mesenchymal transition in ovarian carcinosarcoma	41416_2023_2508_MOESM1_ESM.docx	6-Target		78	12	2.62954	0.00181871	0.0212515	105fcbea-6c99-5dd8-9268-05890c85a26f
PMC10807352	Single‐cell landscape of the cellular microenvironment in three different colonic polyp subtypes in children	CTM2-14-e1535-s001.xlsx	Table_S4-Unnamed_4		200	27	2.30742	4.14181e-05	0.000877629	306584cc-9f04-555c-9c59-87523724e2a6
PMC10807352	Single‐cell landscape of the cellular microenvironment in three different colonic polyp subtypes in children	CTM2-14-e1535-s001.xlsx	Table_S4-Unnamed_3		97	13	2.29068	0.00417852	0.0407537	a63e2858-8085-5347-940a-825fb4396fbd
PMC10808913	Multi-tissue transcriptomics of a unique monozygotic discordant twin case of severe progressive osseous heteroplasia	mmc3.xlsx	Hoja1-Table_S2_Normalized_expression_of_heterotopic_bone_samples_and_bone_from_healthy_control_In_addition_log2FC_values_between_comparisons_are_also_provided		770	87	1.93117	1.64968e-09	9.96217e-08	127a715c-6fa2-52bf-a568-f09f220c95b5
PMC10808913	Multi-tissue transcriptomics of a unique monozygotic discordant twin case of severe progressive osseous heteroplasia	mmc4.xlsx	Hoja1-Table_S4_Normalized_expression_of_skin_samples_from_the_patient_and_skin_from_healthy_control_In_addition_log2FC_values_between_comparisons_are_also_provided		770	87	1.93117	1.64968e-09	9.96217e-08	127a715c-6fa2-52bf-a568-f09f220c95b5
PMC10817385	Clinical significance and immune characteristics analysis of miR-221-3p and its key target genes related to epithelial-mesenchymal transition in breast cancer	aging-16-205370-s004.xlsx	Supplement_Table_3-Supplementary_Table_3_Differentially_expressed_genes_n_2401		2400	236	1.68071	8.7513e-18	2.13585e-15	4d3b2e04-1e16-53ae-b0f3-aca84f046088
PMC10817385	Clinical significance and immune characteristics analysis of miR-221-3p and its key target genes related to epithelial-mesenchymal transition in breast cancer	aging-16-205370-s003.xlsx	Supplement_Table_2-Supplementary_Table_2_EMT-related_genes_obtained_from_the_dbEMT_2_0_database_n_1184		1009	100	1.69395	8.57472e-08	3.57712e-06	75a9668a-2f12-5a8a-bdb2-b8b07bd6c901
PMC10817385	Clinical significance and immune characteristics analysis of miR-221-3p and its key target genes related to epithelial-mesenchymal transition in breast cancer	aging-16-205370-s002.xlsx	Supplement_Table_1-Unnamed_2		2337	190	1.38959	3.17586e-07	1.16355e-05	0ff7030d-6ec3-5382-a435-7054eb370801
PMC10823534	Single-cell RNA sequencing analysis identifies one subpopulation of endothelial cells that proliferates and another that undergoes the endothelial-mesenchymal transition in regenerating pig hearts	Table2.xlsx	A-Gene		222	29	2.23274	4.04031e-05	0.000859555	ce6bfbc3-b003-5eb4-bd24-d4905098bd07
PMC10835456	Injectable thermosensitive selenium-containing hydrogel as mesenchymal stem cell carrier to improve treatment efficiency in limb ischemia	mmc1.docx	2-Gene_Symbol		210	30	2.44171	5.07481e-06	0.000138445	274dbcec-ded4-597d-b86e-2df29cd437ab
PMC10838290	ANKRD1 is a mesenchymal-specific driver of cancer-associated fibroblast activation bridging androgen receptor loss to AP-1 activation	41467_2024_45308_MOESM13_ESM.xlsx	5f-Unnamed_2		562	60	1.82477	4.07519e-06	0.000113924	6810f2fd-20d3-55a4-a482-ed4880d8d701
PMC10838290	ANKRD1 is a mesenchymal-specific driver of cancer-associated fibroblast activation bridging androgen receptor loss to AP-1 activation	41467_2024_45308_MOESM4_ESM.xlsx	TFs_in_shAR_UP-shAR_UP		593	62	1.78702	5.50544e-06	0.000148886	4c18b8ae-ac25-534c-bc07-d4d2d5cf710b
PMC10838290	ANKRD1 is a mesenchymal-specific driver of cancer-associated fibroblast activation bridging androgen receptor loss to AP-1 activation	41467_2024_45308_MOESM4_ESM.xlsx	TFs_in_CAFs-TFs_Co-TFs_in_CAFs_UP		85	16	3.21731	2.86391e-05	0.000635891	e757b642-daa9-51d8-9f3e-f5c5ccb7774a
PMC10838290	ANKRD1 is a mesenchymal-specific driver of cancer-associated fibroblast activation bridging androgen receptor loss to AP-1 activation	41467_2024_45308_MOESM4_ESM.xlsx	TFs_in_shCSL_UP-shCSL_UP		141	21	2.54561	6.99972e-05	0.00138317	04d76506-b1ea-5e02-8913-3b7a3d9c1061
PMC10838290	ANKRD1 is a mesenchymal-specific driver of cancer-associated fibroblast activation bridging androgen receptor loss to AP-1 activation	41467_2024_45308_MOESM13_ESM.xlsx	4f-Unnamed_1		729	67	1.57087	0.000137188	0.00246069	4af58224-1b4d-5f28-9405-cef935a44a16
PMC10838290	ANKRD1 is a mesenchymal-specific driver of cancer-associated fibroblast activation bridging androgen receptor loss to AP-1 activation	41467_2024_45308_MOESM6_ESM.xlsx	Table_3_ARCHS4_Tissues_shANKRD1-Unnamed_81		29	8	4.71503	0.000189563	0.00324059	24b97f30-d84e-5fab-816d-ad3058a20c22
PMC10838290	ANKRD1 is a mesenchymal-specific driver of cancer-associated fibroblast activation bridging androgen receptor loss to AP-1 activation	41467_2024_45308_MOESM4_ESM.xlsx	TFs_in_CAFs_treated_with_JQ1_DN-JQ1_DN		304	34	1.9116	0.000211669	0.00356309	1b95efe3-5ad9-5dc9-b94e-0c3ebb159cad
PMC10838290	ANKRD1 is a mesenchymal-specific driver of cancer-associated fibroblast activation bridging androgen receptor loss to AP-1 activation	41467_2024_45308_MOESM4_ESM.xlsx	TFs_in_CAFs-CAFs_UP		699	64	1.56493	0.000215348	0.00361379	c3751ee3-dc8a-58b2-aca0-b491e46360f5
PMC10838290	ANKRD1 is a mesenchymal-specific driver of cancer-associated fibroblast activation bridging androgen receptor loss to AP-1 activation	41467_2024_45308_MOESM6_ESM.xlsx	Table_3_ARCHS4_Tissues_shANKRD1-Unnamed_131		5	3	10.2552	0.00182554	0.0212548	bbac576f-c3d5-539f-aea2-5467a361c6d7
PMC10838290	ANKRD1 is a mesenchymal-specific driver of cancer-associated fibroblast activation bridging androgen receptor loss to AP-1 activation	41467_2024_45308_MOESM13_ESM.xlsx	4d-Unnamed_131		5	3	10.2552	0.00182554	0.0212548	bbac576f-c3d5-539f-aea2-5467a361c6d7
PMC10838290	ANKRD1 is a mesenchymal-specific driver of cancer-associated fibroblast activation bridging androgen receptor loss to AP-1 activation	41467_2024_45308_MOESM5_ESM.xlsx	shANKRD1_Down-Gene_Symbol		867	69	1.36498	0.00455061	0.0437838	f7a700a9-be09-5835-b96f-194fa2576587
PMC10838290	ANKRD1 is a mesenchymal-specific driver of cancer-associated fibroblast activation bridging androgen receptor loss to AP-1 activation	41467_2024_45308_MOESM13_ESM.xlsx	4a-Figure_4a		867	69	1.36498	0.00455061	0.0437838	f7a700a9-be09-5835-b96f-194fa2576587
PMC10842760	Heterogeneity and transcriptional drivers of triple-negative breast cancer	NIHMS1954806-supplement-2.xlsx	Mesenchymal_diff_SEs-closest_gene		1249	110	1.5065	5.76694e-06	0.000155035	1d7834e0-b77b-5902-a52e-75d86d76393c
PMC10850426	Hepatocellular carcinoma patients serum modulates the regenerative capacities of adipose mesenchymal stromal cells	mmc1.xlsx	Dataset_3-SYMBOL		525	58	1.88826	2.04118e-06	6.15658e-05	8c11b20a-7164-5692-aeb2-e386ff5cefc0
PMC10869908	Functional requirement of alternative splicing in epithelial-mesenchymal transition of pancreatic circulating tumor	mmc3.xlsx	EMT_diffSig-Table_S2_Differential_expression_EMT_genes_in_CTC_and_epithelial_PDAC		206	22	1.82536	0.00460014	0.0441522	b4d61e52-767a-525d-93c4-4150adea29d1
PMC10878168	Comparison of the single-cell and single-nucleus hepatic myeloid landscape within decompensated cirrhosis patients	DataSheet_2.xlsx	Mesenchymal_subclusters-Fibroblasts		98	17	2.96494	4.87355e-05	0.00101063	437fc6a9-dd57-5fb2-bea7-614cb784dea7
PMC10878168	Comparison of the single-cell and single-nucleus hepatic myeloid landscape within decompensated cirrhosis patients	DataSheet_2.xlsx	Clusters-Mesenchymal_cells		97	15	2.64309	0.000488293	0.00722953	9e31c5dc-89a6-5351-97eb-b40d8d830526
PMC10878168	Comparison of the single-cell and single-nucleus hepatic myeloid landscape within decompensated cirrhosis patients	DataSheet_2.xlsx	Mesenchymal_subclusters-Hepatic_stellate_cells		96	13	2.31454	0.00381759	0.0381412	9e5c7fec-c877-5463-a374-c01ad76a197d
PMC10879170	Differential gene expression in two consecutive pregnancies between same sex siblings and implications on maternal constraint	41598_2024_54724_MOESM4_ESM.xlsx	Integrated_meanRank-TF		1609	136	1.44469	3.47613e-06	9.8871e-05	b94103e7-6fb5-5429-8416-113e251632f8
PMC10895648	Breast cancer cell mesenchymal transition and metastasis directed by DAP5/eIF3d-mediated selective mRNA translation	NIHMS1955190-supplement-1.pdf	3-GCN1		30	7	3.98813	0.00142356	0.0173855	0ac01e24-0fcf-522e-b604-d34a0584c36f
PMC10905802	Tight junction protein cingulin variant is associated with cancer susceptibility by overexpressed IQGAP1 and Rac1-dependent epithelial-mesenchymal transition	13046_2024_2987_MOESM5_ESM.xlsx	Table_S4-Gene		96	15	2.67062	0.000435901	0.00655841	63fbb4e0-4710-56ed-8fb0-00beeb7f19e5
PMC10905802	Tight junction protein cingulin variant is associated with cancer susceptibility by overexpressed IQGAP1 and Rac1-dependent epithelial-mesenchymal transition	13046_2024_2987_MOESM5_ESM.xlsx	Table_S4-SYMBOL		96	14	2.49258	0.00134039	0.0165966	4be9493b-1a38-535d-9843-58383e4eddb4
PMC10913679	Transplantation of the LRP1high subpopulation of human umbilical cord-derived mesenchymal stem cells improves ovarian function in mice with premature ovarian failure and aged mice	13287_2024_3660_MOESM2_ESM.xlsx	Table_S1-Unnamed_1		483	47	1.6632	0.000401398	0.00611596	62e3064d-86ec-581c-9907-f6c5f25096de
PMC10916575	Meta‐Analysis of Integrated Proteomic and Transcriptomic Data Discerns Structure–Activity Relationship of Carbon Materials with Different Morphologies	ADVS-11-2306268-s001.xlsx	UV_RESPONSE_DN-V2		144	31	3.67952	1.91406e-10	1.38791e-08	8eb61553-8184-5ae6-bc69-5fd71bb88020
PMC10916575	Meta‐Analysis of Integrated Proteomic and Transcriptomic Data Discerns Structure–Activity Relationship of Carbon Materials with Different Morphologies	ADVS-11-2306268-s001.xlsx	KRAS_SIGNALING_UP-V2		200	26	2.22196	0.000107886	0.00200845	d026b43b-724d-5d8b-8cec-5914c9207998
PMC10916575	Meta‐Analysis of Integrated Proteomic and Transcriptomic Data Discerns Structure–Activity Relationship of Carbon Materials with Different Morphologies	ADVS-11-2306268-s001.xlsx	MITOTIC_SPINDLE-V2		199	25	2.14723	0.000249244	0.00408606	abbb65e0-9615-5ad6-9d78-6c6bcd57fd6c
PMC10916575	Meta‐Analysis of Integrated Proteomic and Transcriptomic Data Discerns Structure–Activity Relationship of Carbon Materials with Different Morphologies	ADVS-11-2306268-s001.xlsx	ESTROGEN_RESPONSE_EARLY-V2		200	23	1.96558	0.00147383	0.017908	a66ee8d0-6d6f-575d-930b-53f3f3733ffe
PMC10916575	Meta‐Analysis of Integrated Proteomic and Transcriptomic Data Discerns Structure–Activity Relationship of Carbon Materials with Different Morphologies	ADVS-11-2306268-s001.xlsx	INTERFERON_ALPHA_RESPONSE-V2		97	13	2.29068	0.00417852	0.0407537	a63e2858-8085-5347-940a-825fb4396fbd
PMC10923901	Tropomyosin1 isoforms underlie epithelial to mesenchymal plasticity, metastatic dissemination, and resistance to chemotherapy in high-grade serous ovarian cancer	41418_2024_1267_MOESM15_ESM.xlsx	Sheet_1-Unnamed_2		2008	159	1.3534	1.75939e-05	0.000415961	cf0d034c-1ff5-5762-9575-ffcf7f21134e
PMC10923901	Tropomyosin1 isoforms underlie epithelial to mesenchymal plasticity, metastatic dissemination, and resistance to chemotherapy in high-grade serous ovarian cancer	41418_2024_1267_MOESM14_ESM.xls	OV90_AS_diffpsi0_1_with_event_t-Unnamed_2		1844	143	1.32546	0.000139381	0.00249567	17b32d92-418e-5255-b815-221e6a7ee030
PMC10926146	Uncovering the subtype-specific disease module and the development of drug response prediction models for glioma	mmc3.xlsx	Mesenchymal-Differentially_expressed_genes_in_mesenchymal_subtype_GBM		2112	194	1.57149	1.16107e-11	1.0496e-09	beaf142c-074e-5c95-872d-74635ad75c86
PMC10926146	Uncovering the subtype-specific disease module and the development of drug response prediction models for glioma	mmc1.xlsx	Mesenchymal-List_of_driver_genes_in_mesenchymal_subtype_GBM		1321	136	1.76366	1.58628e-11	1.39881e-09	e4fec8ae-2239-5e81-8102-23e9291a8bc3
PMC10926146	Uncovering the subtype-specific disease module and the development of drug response prediction models for glioma	mmc6.xlsx	Mesenchymal-List_of_disease_module_genes_in_mesenchymal_of_GBM		475	66	2.37489	3.88189e-11	3.19854e-09	7a8b0a9b-931d-52a5-b0ec-cefce07d0c37
PMC10926146	Uncovering the subtype-specific disease module and the development of drug response prediction models for glioma	mmc5.xlsx	Mesenchymal-Network_of_DEDGs_in_mesenchymal_subtype_of_GBM		167	29	2.96807	1.18374e-07	4.78022e-06	9dad1828-9d85-54c0-8c4a-e3ac6516154e
PMC10926146	Uncovering the subtype-specific disease module and the development of drug response prediction models for glioma	mmc5.xlsx	Mesenchymal-Unnamed_1		158	26	2.8126	1.53133e-06	4.75724e-05	f1928ed4-ece4-57de-b5e0-cf48ecc5bdeb
PMC10942339	Myc Dysregulation in Activated Macrophages Initiates Iron-Mediated Lipid Peroxidation that Fuels Type I Interferon and Compromises TB Resistance	media-3.xlsx	Table_4_Pool_IFN_I_II_gene_sets-Unnamed_11		200	27	2.30742	4.14181e-05	0.000877629	306584cc-9f04-555c-9c59-87523724e2a6
PMC10942339	Myc Dysregulation in Activated Macrophages Initiates Iron-Mediated Lipid Peroxidation that Fuels Type I Interferon and Compromises TB Resistance	media-3.xlsx	Table_4_Pool_IFN_I_II_gene_sets-Unnamed_3		97	13	2.29068	0.00417852	0.0407537	a63e2858-8085-5347-940a-825fb4396fbd
PMC10976750	Characterization of the biological and transcriptomic landscapes of bone marrow-derived mesenchymal stem cells in patients with multiple myeloma	12935_2024_3308_MOESM2_ESM.xlsx	Sheet1-Unnamed_1		882	142	2.75177	1.09327e-29	1.1072e-26	7f672826-9463-551b-a390-fcd5c4c4a69f
PMC10984889	Rapamycin Inhibits Senescence and Improves Immunomodulatory Function of Mesenchymal Stem Cells Through IL-8 and TGF-β Signaling	12015_2024_10682_MOESM1_ESM.xlsx	Genes_with_2-fold_change-Unnamed_1		379	47	2.11959	8.28071e-07	2.73646e-05	677e40aa-273a-5f9b-a494-01b1735c9d0e
PMC10985985	Investigating the impact of regulatory B cells and regulatory B cell-related genes on bladder cancer progression and immunotherapeutic sensitivity	13046_2024_3017_MOESM1_ESM.xlsx	Table_S18-Table_S18_The_predictive_ability_of_BREGRS_to_the_mutational_statuses_of_the_Top_20_genes_with_the_highest_mutation_frequency		20	5	4.273	0.00502658	0.0472164	a8281a3a-a22b-5067-a9bb-4aa313853c5e
PMC10988135	Mesenchymal stem cells reverse thymus aging by reprogramming the DNA methylation of thymic epithelial cells	main.nxml	Table_6-id		839	94	1.91495	5.30495e-10	3.51812e-08	4d69cd57-df9b-5fb1-9fc9-40f3952529fd
PMC11006985	In vitro aging alters the gene expression and secretome composition of canine adipose-derived mesenchymal stem cells	Data_Sheet_1.PDF	1-Symbol		37	7	3.23362	0.00504	0.0472575	648dd17f-ef94-5073-909e-ed328559ae61
PMC11018113	High glutamine increases stroke risk by inducing the endothelial‐to‐mesenchymal transition in moyamoya disease	MCO2-5-e525-s001.docx	2-Gene_name		385	60	2.66369	2.58028e-12	2.64279e-10	fcf335f7-a11c-5f7c-90c7-3e20e1ef252d
PMC11024179	TAK1 inhibition leads to RIPK1-dependent apoptosis in immune-activated cancers	41419_2024_6654_MOESM11_ESM.xlsx	S9_Signatures-Table_S9_Gene_signatures		200	27	2.30742	4.14181e-05	0.000877629	306584cc-9f04-555c-9c59-87523724e2a6
PMC11024179	TAK1 inhibition leads to RIPK1-dependent apoptosis in immune-activated cancers	41419_2024_6654_MOESM11_ESM.xlsx	S9_Signatures-Unnamed_1		97	13	2.29068	0.00417852	0.0407537	a63e2858-8085-5347-940a-825fb4396fbd
PMC11024677	Deciphering metastatic route‐specific signals and their microenvironment interactions in peritoneal metastasis of gastric cancer	CAC2-44-514-s002.xlsx	Sup_Table_S5-Supplementary_Table_S5_The_122_of_metastasis_specific_Epthelial-Mesenchymal_Transition_msEMT_genes_and_the_associations_to_well-established_gene-sets		122	15	2.10147	0.00500814	0.0472164	da37c955-3748-599f-9012-dbb119e46a30
PMC11044395	Effect of metabolically divergent pig breeds and tissues on mesenchymal stem cell expression patterns during adipogenesis	12864_2024_10308_MOESM2_ESM.xlsx	Table_S2-Unnamed_1		1067	129	2.06642	5.72141e-16	1.06784e-13	34f669cf-702f-542a-8b99-c36704f9e261
PMC11056323	Osteoporosis GWAS-implicated DNM3 locus contextually regulates osteoblastic and chondrogenic fate of mesenchymal stem/progenitor cells through oscillating miR-199a-5p levels	supplementary_table_1_ziae051.xlsx	Combined-Unnamed_2		623	75	2.05762	1.52667e-09	9.2829e-08	47d3269c-9229-5a6b-8b80-68b873c0ae49
PMC11056323	Osteoporosis GWAS-implicated DNM3 locus contextually regulates osteoblastic and chondrogenic fate of mesenchymal stem/progenitor cells through oscillating miR-199a-5p levels	supplementary_table_2_ziae051.xlsx	Combined-Unnamed_2		688	78	1.93775	1.06054e-08	5.44697e-07	e3884138-7d3f-5c5e-bca8-a315ed9d0a5f
PMC11056323	Osteoporosis GWAS-implicated DNM3 locus contextually regulates osteoblastic and chondrogenic fate of mesenchymal stem/progenitor cells through oscillating miR-199a-5p levels	supplementary_table_1_ziae051.xlsx	Combined-Unnamed_8		193	30	2.67062	7.6615e-07	2.55311e-05	d025e2dc-410d-57de-8622-8504c68c295d
PMC11056323	Osteoporosis GWAS-implicated DNM3 locus contextually regulates osteoblastic and chondrogenic fate of mesenchymal stem/progenitor cells through oscillating miR-199a-5p levels	supplementary_table_2_ziae051.xlsx	Combined-Unnamed_4		199	30	2.57668	1.65272e-06	5.0974e-05	ff80f976-9b5b-50aa-8e35-46ce75074e3c
PMC11056323	Osteoporosis GWAS-implicated DNM3 locus contextually regulates osteoblastic and chondrogenic fate of mesenchymal stem/progenitor cells through oscillating miR-199a-5p levels	supplementary_table_1_ziae051.xlsx	Combined-Unnamed_6		293	38	2.21671	3.22527e-06	9.24499e-05	a3c63cd6-4e0e-5865-b230-be4b5202079e
PMC11056323	Osteoporosis GWAS-implicated DNM3 locus contextually regulates osteoblastic and chondrogenic fate of mesenchymal stem/progenitor cells through oscillating miR-199a-5p levels	supplementary_table_2_ziae051.xlsx	Combined-Unnamed_8		200	29	2.47834	5.40073e-06	0.000146346	0f02bc37-309f-5365-9451-7d20680c5109
PMC11056323	Osteoporosis GWAS-implicated DNM3 locus contextually regulates osteoblastic and chondrogenic fate of mesenchymal stem/progenitor cells through oscillating miR-199a-5p levels	supplementary_table_1_ziae051.xlsx	Combined-Unnamed_4		194	27	2.37878	2.39927e-05	0.000544958	2c332fd5-9c61-5087-bfdd-d1989c08dede
PMC11071458	Colorectal Cancer Stem Cell Subtypes Orchestrate Distinct Tumor Microenvironments	media-3.xlsx	hallmark_GOBP-hallmark_interferon_alpha_response		97	13	2.29068	0.00417852	0.0407537	a63e2858-8085-5347-940a-825fb4396fbd
PMC11080797	Equine mesenchymal stem cell derived extracellular vesicle immunopathology biomarker discovery	JEX2-2-e89-s001.pdf	3-Unnamed_4		44	8	3.10763	0.00359316	0.0363432	26810974-97bf-5c3e-8c1c-1e7ccbbff388
PMC11093744	Generation of complex bone marrow organoids from human induced pluripotent stem cells	41592_2024_2172_MOESM3_ESM.xlsx	mesenchymal-genes		1024	86	1.43546	0.00033889	0.00531735	6e3c88d6-ff6c-5023-a5eb-405062be47d9
PMC11118094	Modulation of Epithelial–Mesenchymal Transition Is a Possible Underlying Mechanism for Inducing Chemoresistance in MIA PaCa-2 Cells against Gemcitabine and Paclitaxel	biomedicines-12-01011.nxml	Table_1-Unnamed_4		14	5	6.10428	0.000870271	0.0116338	cf14e1f9-3885-5aa6-af20-e23b3b9f36fb
PMC11118094	Modulation of Epithelial–Mesenchymal Transition Is a Possible Underlying Mechanism for Inducing Chemoresistance in MIA PaCa-2 Cells against Gemcitabine and Paclitaxel	biomedicines-12-01011.nxml	Table_2-GEM_Resistance		37	8	3.69556	0.00112426	0.0144053	eb6a2a97-5a8b-52f2-8f40-fbab9da4aa6b
PMC11118439	Androgen receptor activity inversely correlates with immune cell infiltration and immunotherapy response across multiple cancer lineages	media-2.xlsx	immune_signatures-Prognostic_Immune_gene_signatures_Genes_highlighted_in_red_overlap_with_the_AR_regulon_and_were_removed_from_the_correlation_analysis		200	27	2.30742	4.14181e-05	0.000877629	306584cc-9f04-555c-9c59-87523724e2a6
PMC11129367	Multi-omics profiling reveals dysregulated ribosome biogenesis and impaired cell proliferation following knockout of CDR2L	12885_2024_12399_MOESM9_ESM.xlsx	Sheet_1-TF		1609	136	1.44469	3.47613e-06	9.8871e-05	b94103e7-6fb5-5429-8416-113e251632f8
PMC11131992	Bioinformatics analysis and validation of mesenchymal stem cells related gene MT1G in osteosarcoma	aging-16-205809-s002.xls	Table_S1-Unnamed_1		84	12	2.44171	0.00343443	0.0351839	4b45e113-c965-5d92-83c3-ae9647ac24ad
PMC11139680	Single-cell RNA sequencing reveals the heterogeneity of adipose tissue-derived mesenchymal stem cells under chondrogenic induction	bmb-57-5-232-supple3.xlsx	DEG_1W_up-Supplementary_file_1_A_list_of_differentially_expressed_genes_DEGs_and_enriched_GO_terms_in_1W_and_2W_cells_compared_to_control_cells		2417	257	1.81739	2.28186e-24	1.27084e-21	f153e18f-c234-5f6e-ae99-baab8982c416
PMC11139680	Single-cell RNA sequencing reveals the heterogeneity of adipose tissue-derived mesenchymal stem cells under chondrogenic induction	bmb-57-5-232-supple3.xlsx	DEG_1W_up-Unnamed_1		2405	256	1.81935	2.50121e-24	1.38487e-21	11c42bab-78e7-55e6-8bed-6b0f37f3b80b
PMC11166648	Direct RNA sequencing of astronaut blood reveals spaceflight-associated m6A increases and hematopoietic transcriptional responses	41467_2024_48929_MOESM7_ESM.xlsx	Supplemental-Table-S4_1-TF		1609	136	1.44469	3.47613e-06	9.8871e-05	b94103e7-6fb5-5429-8416-113e251632f8
PMC11216188	Functional variation among mesenchymal stem cells derived from different tissue sources	peerj-12-17616-s013.pdf	111-CCHCR1		36	12	5.69733	5.06682e-07	1.76448e-05	d27ea5f0-45c3-5efd-af9d-b7fcc34fea2f
PMC11216188	Functional variation among mesenchymal stem cells derived from different tissue sources	peerj-12-17616-s013.pdf	110-ZSCAN16		37	12	5.54335	7.10132e-07	2.38611e-05	29fd70da-26fa-54b7-8b6b-cc6b37ee0810
PMC11216188	Functional variation among mesenchymal stem cells derived from different tissue sources	peerj-12-17616-s013.pdf	112-PPT2		37	10	4.61945	3.65622e-05	0.00078718	dadc6a2e-f4b1-5732-8c46-c37977cc8f27
PMC11216188	Functional variation among mesenchymal stem cells derived from different tissue sources	peerj-12-17616-s013.pdf	59-HRH1		39	9	3.9443	0.00033263	0.00522897	9a0d62be-ba2b-5c96-913a-f7fd3f42ee55
PMC11216188	Functional variation among mesenchymal stem cells derived from different tissue sources	peerj-12-17616-s013.pdf	282-ZNF830		35	8	3.90674	0.000760373	0.0103802	3e982eda-248a-5ca9-990c-97f03612e4d7
PMC11216188	Functional variation among mesenchymal stem cells derived from different tissue sources	peerj-12-17616-s013.pdf	126-CCZ1B		37	8	3.69556	0.00112426	0.0144053	4335cd50-fdb3-5215-a310-89c196937473
PMC11216188	Functional variation among mesenchymal stem cells derived from different tissue sources	peerj-12-17616-s013.pdf	22-AL162258_2		40	8	3.4184	0.00191701	0.022048	5e58cbdc-b4b2-59c7-8325-b232fd8b85f6
PMC11216188	Functional variation among mesenchymal stem cells derived from different tissue sources	peerj-12-17616-s009.pdf	19-KIF15		41	8	3.33502	0.00226167	0.0252089	5dbedf11-5824-5f5e-9894-f8f7a9714ec8
PMC11216188	Functional variation among mesenchymal stem cells derived from different tissue sources	peerj-12-17616-s009.pdf	19-KIF15_1		41	8	3.33502	0.00226167	0.0252089	5dbedf11-5824-5f5e-9894-f8f7a9714ec8
PMC11216188	Functional variation among mesenchymal stem cells derived from different tissue sources	peerj-12-17616-s013.pdf	247-SNRPN		27	6	3.79822	0.00404148	0.0397395	55ebf8d6-7884-50f8-978d-92e1dcc58afb
PMC11216188	Functional variation among mesenchymal stem cells derived from different tissue sources	peerj-12-17616-s013.pdf	146-YIPF6		36	7	3.32344	0.00429932	0.0416965	bc9b2f18-cabe-551e-956f-36c8e723a03a
PMC11216188	Functional variation among mesenchymal stem cells derived from different tissue sources	peerj-12-17616-s013.pdf	104-FBLL1		37	7	3.23362	0.00504	0.0472575	c5dc1f04-23f0-5d6e-801f-2a998175c1ed
PMC11216402	Machine learning identifies activation of RUNX/AP-1 as drivers of mesenchymal and fibrotic regulatory programs in gastric cancer	Supplemental_Table_S4.xlsx	Cluster_6_-_Fibroblast-LUM		483	52	1.84013	1.43266e-05	0.000347333	c202f9ac-9e4d-53a9-9912-3627d57dd11b
PMC11216402	Machine learning identifies activation of RUNX/AP-1 as drivers of mesenchymal and fibrotic regulatory programs in gastric cancer	Supplemental_Table_S4.xlsx	Cluster_2_-_Stomach-PHGR1		342	40	1.99906	2.19104e-05	0.000503573	7d002d23-31ce-545e-93dd-642c815452a7
PMC11216402	Machine learning identifies activation of RUNX/AP-1 as drivers of mesenchymal and fibrotic regulatory programs in gastric cancer	Supplemental_Table_S1.xlsx	1_DEG-Mes_VS_Epi_Cell_Lines-GENE_SYMBOL		1766	142	1.37433	2.67814e-05	0.000599857	e369ffce-efa8-557a-a0ef-0ce815457921
PMC11216402	Machine learning identifies activation of RUNX/AP-1 as drivers of mesenchymal and fibrotic regulatory programs in gastric cancer	Supplemental_Table_S1.xlsx	1_DEG-Mes_VS_Epi_Cell_Lines-GENE_ID		1768	142	1.37277	2.83141e-05	0.000629891	43c879ea-31c7-52c2-ae19-462d61c59923
PMC11225361	Increased prevalence of hybrid epithelial/mesenchymal state and enhanced phenotypic heterogeneity in basal breast cancer	mmc2.xlsx	Sheet1-EMT_down		87	13	2.55397	0.00156906	0.0189034	cbebece3-d147-5464-a37d-751d9db4cf74
PMC11225923	Dynamics of DNA methylation during osteogenic differentiation of porcine synovial membrane mesenchymal stem cells from two metabolically distinct breeds	KEPI_A_2375011_SM7645.xlsx	Table_S5-Unnamed_10		195	21	1.84068	0.00504446	0.0472575	784c9468-fc5d-5539-9325-2da299b9c8b5
PMC11227973	Transcriptomic analysis reveals the anti-cancer effect of gestational mesenchymal stem cell secretome	szae024_suppl_supplementary_tables_1.pdf	4-BCL2		45	10	3.79822	0.000218539	0.0036535	b727d8b1-b396-529c-b864-8a7985d9fb06
PMC11233932	Identification of an alternative ligand‐binding pocket in peroxisome proliferator‐activated receptor gamma and its correlated selective agonist for promoting beige adipocyte differentiation	MCO2-5-e650-s001.xlsx	ChEA_analysis_data-TF		1609	136	1.44469	3.47613e-06	9.8871e-05	b94103e7-6fb5-5429-8416-113e251632f8
PMC11251458	Endonucleolytic RNA cleavage drives changes in gene expression during the innate immune response	NIHMS2005222-supplement-4.xlsx	complete_list_IFN-full_Hallmark_dataset_Interferon_gamma		97	13	2.29068	0.00417852	0.0407537	a63e2858-8085-5347-940a-825fb4396fbd
PMC11256664	miR-29a-3p orchestrates key signaling pathways for enhanced migration of human mesenchymal stem cells	12964_2024_1737_MOESM1_ESM.docx	3-SYMBOL		62	10	2.75677	0.00299466	0.0316023	9ba7414c-e25e-5302-99af-3eb35467a66b
PMC11276930	High efficiency protocol for platelet derived fibrin gel loaded with mesenchymal stromal cells extracellular vesicles	mmc2.xlsx	Foglio1-Unnamed_20		39	11	4.82082	9.53329e-06	0.000242323	0b1688f6-791c-5f3e-9d11-be9cd8711dab
PMC11276930	High efficiency protocol for platelet derived fibrin gel loaded with mesenchymal stromal cells extracellular vesicles	mmc2.xlsx	Foglio1-Unnamed_46		88	15	2.91341	0.000163617	0.00286109	81bc3b83-6c81-5280-a18f-746ecdd57319
PMC11276930	High efficiency protocol for platelet derived fibrin gel loaded with mesenchymal stromal cells extracellular vesicles	mmc2.xlsx	Foglio1-Unnamed_15		29	8	4.71503	0.000189563	0.00324059	a7eef52b-0e3e-56d2-9adb-4b16000b4b60
PMC11276930	High efficiency protocol for platelet derived fibrin gel loaded with mesenchymal stromal cells extracellular vesicles	mmc2.xlsx	Foglio1-Unnamed_73		26	7	4.60169	0.000564601	0.00813124	1950a466-44f4-55db-8137-a1fb587435df
PMC11276930	High efficiency protocol for platelet derived fibrin gel loaded with mesenchymal stromal cells extracellular vesicles	mmc2.xlsx	Foglio1-Unnamed_36		44	9	3.49609	0.000855412	0.0114803	7476138d-04b3-588c-a5bf-5a92d6ed8493
PMC11276930	High efficiency protocol for platelet derived fibrin gel loaded with mesenchymal stromal cells extracellular vesicles	mmc2.xlsx	Foglio1-Unnamed_51		54	10	3.16518	0.00101676	0.0132163	4e202eb1-878f-54f7-bd4d-0719373576df
PMC11276930	High efficiency protocol for platelet derived fibrin gel loaded with mesenchymal stromal cells extracellular vesicles	mmc2.xlsx	Foglio1-Unnamed_44		74	12	2.77167	0.00113841	0.0145547	b62a0662-38bf-5477-b28b-adec76f3b8d4
PMC11276930	High efficiency protocol for platelet derived fibrin gel loaded with mesenchymal stromal cells extracellular vesicles	mmc2.xlsx	Foglio1-Unnamed_63		55	10	3.10763	0.00117866	0.0149444	1973f12f-02e8-5b51-ac51-e5937a02293c
PMC11276930	High efficiency protocol for platelet derived fibrin gel loaded with mesenchymal stromal cells extracellular vesicles	mmc2.xlsx	Foglio1-Unnamed_34		86	13	2.58367	0.00140839	0.017253	cd2ccf5f-a3d6-53a1-870c-4f04e9e45a43
PMC11276930	High efficiency protocol for platelet derived fibrin gel loaded with mesenchymal stromal cells extracellular vesicles	mmc2.xlsx	Foglio1-Unnamed_10		141	18	2.18196	0.00145954	0.0177526	541ff589-24a2-561a-87d9-9f853ba41769
PMC11276930	High efficiency protocol for platelet derived fibrin gel loaded with mesenchymal stromal cells extracellular vesicles	mmc2.xlsx	Foglio1-Unnamed_61		78	12	2.62954	0.00181871	0.0212515	fb18d2ef-3857-5553-8609-2eb581c9344a
PMC11276930	High efficiency protocol for platelet derived fibrin gel loaded with mesenchymal stromal cells extracellular vesicles	mmc2.xlsx	Foglio1-Unnamed_32		32	7	3.73887	0.00212507	0.0240328	462fc71a-448b-548d-a541-08ea633a5449
PMC11287127	Spatial and temporal gene expression patterns during early human odontogenesis process	Table1.XLS	human_epithelium_VS_mesenchyme-Unnamed_0		1440	124	1.47181	4.20663e-06	0.000117248	ce78a365-ba26-5796-aa9c-d4a5b3a4cafb
PMC11301078	SPI1-KLF1/LYL1 axis regulates lineage commitment during endothelial-to-hematopoietic transition from human pluripotent stem cells	mmc2.csv	TF		1609	136	1.44469	3.47613e-06	9.8871e-05	b94103e7-6fb5-5429-8416-113e251632f8
PMC11301078	SPI1-KLF1/LYL1 axis regulates lineage commitment during endothelial-to-hematopoietic transition from human pluripotent stem cells	mmc3.csv	TF		1609	136	1.44469	3.47613e-06	9.8871e-05	b94103e7-6fb5-5429-8416-113e251632f8
PMC11321654	Sexually Dimorphic Response to Hepatic Injury in Newborn Suffering from Intrauterine Growth Restriction	ADVS-11-2403095-s017.xlsb	Mesenchymal_cells_DEGs-gene		957	88	1.57168	1.14972e-05	0.000285854	b78b7abb-5018-5258-b1a6-2f4120817f37
PMC11321654	Sexually Dimorphic Response to Hepatic Injury in Newborn Suffering from Intrauterine Growth Restriction	ADVS-11-2403095-s011.xlsb	Mesenchymal_stem_cells_DEGs-Unnamed_0		413	46	1.90371	1.91397e-05	0.000447156	4ed6574d-c1ce-5450-88c3-e66a5d0b64ba
PMC11321654	Sexually Dimorphic Response to Hepatic Injury in Newborn Suffering from Intrauterine Growth Restriction	ADVS-11-2403095-s011.xlsb	Mesenchymal_stem_cells_DEGs-gene		432	47	1.85954	2.83716e-05	0.000631022	744c816d-cfc3-5ad2-880e-e5472c1a94aa
PMC11338805	Effective enhancement of the immunomodulatory capacity of canine adipose-derived mesenchymal stromal cells on colitis by priming with colon tissue from mice with colitis	Table_1.XLSX	Supplementary_Table_2-Unnamed_1		844	100	2.02512	5.55007e-12	5.33784e-10	b5630457-eef0-5c4d-bd55-d7040603a4f0
PMC11338805	Effective enhancement of the immunomodulatory capacity of canine adipose-derived mesenchymal stromal cells on colitis by priming with colon tissue from mice with colitis	Table_1.XLSX	Supplementary_Table_2-Unnamed_2		558	67	2.05226	1.32836e-08	6.66986e-07	ba2d2a90-c49c-5a2e-ad7a-fc5157889bb8
PMC11338805	Effective enhancement of the immunomodulatory capacity of canine adipose-derived mesenchymal stromal cells on colitis by priming with colon tissue from mice with colitis	Table_1.XLSX	Supplementary_Table_2-Unnamed_3		240	34	2.42136	1.46749e-06	4.58163e-05	b688f21c-5399-5c8e-9a95-0ff79f7bb954
PMC11338805	Effective enhancement of the immunomodulatory capacity of canine adipose-derived mesenchymal stromal cells on colitis by priming with colon tissue from mice with colitis	Table_1.XLSX	Supplementary_Table_3-Unnamed_3		162	19	2.00462	0.00293834	0.0311037	727bd3da-092b-58dc-b19f-df69c66b0b81
PMC11341823	EZH2 represses mesenchymal genes and upholds the epithelial state of breast carcinoma cells	41419_2024_7011_MOESM5_ESM.xlsx	Deregulated_genes_EZH2i_colony-Deregulated_genes_in_breast_adenocarcinoma_cell_lines_plated_at_low_density_and_treated_with_EZH2i_for_14_days_F_S1J		654	88	2.29984	1.0989e-13	1.42488e-11	5cba13c7-8ef2-54ca-8ce7-2771376c58ce
PMC11341823	EZH2 represses mesenchymal genes and upholds the epithelial state of breast carcinoma cells	41419_2024_7011_MOESM5_ESM.xlsx	ChIPseq_positive_promoters-Unnamed_8		1134	126	1.89911	6.71983e-13	7.60219e-11	7cd2cdcd-1c09-509b-8182-e3475f870f2b
PMC11341823	EZH2 represses mesenchymal genes and upholds the epithelial state of breast carcinoma cells	41419_2024_7011_MOESM5_ESM.xlsx	Deregulated_genes_EZH2i_colony-Unnamed_6		1202	124	1.76323	1.50746e-10	1.11526e-08	f1ff39f9-1f9d-516a-9bbb-31e96dc824f9
PMC11341823	EZH2 represses mesenchymal genes and upholds the epithelial state of breast carcinoma cells	41419_2024_7011_MOESM5_ESM.xlsx	EMT-MET_genes_EZH2i_responsive-Unnamed_4		201	31	2.63608	6.72704e-07	2.27408e-05	8ca7a9dc-7863-5e1f-8deb-89e0016b9fd6
PMC11341823	EZH2 represses mesenchymal genes and upholds the epithelial state of breast carcinoma cells	41419_2024_7011_MOESM5_ESM.xlsx	ChIPseq_positive_promoters-List_of_promoters_positive_for_ChIP-seq_signals_shown_in_F_1A		1939	160	1.41038	1.58301e-06	4.90273e-05	cba3e667-1d62-5f4d-b481-0cff0931904c
PMC11341823	EZH2 represses mesenchymal genes and upholds the epithelial state of breast carcinoma cells	41419_2024_7011_MOESM5_ESM.xlsx	EMT-MET_genes_EZH2i_responsive-Unnamed_8		458	52	1.94057	3.16085e-06	9.08163e-05	091cb1ec-0623-5b88-bf51-cf159f20c120
PMC11341823	EZH2 represses mesenchymal genes and upholds the epithelial state of breast carcinoma cells	41419_2024_7011_MOESM5_ESM.xlsx	MCF7_EMT-MET_reversible-MCF-7_Reversible_genes_in_the_EMT-MET_system_F_S2C		353	41	1.98519	2.04459e-05	0.000473848	2b6aeded-b86d-5920-bc03-d41a66af10b2
PMC11341823	EZH2 represses mesenchymal genes and upholds the epithelial state of breast carcinoma cells	41419_2024_7011_MOESM5_ESM.xlsx	MCF7_EZH2i_responsive_genes-Unnamed_2		567	53	1.59766	0.000461525	0.00688683	7247902a-735e-594b-8e72-db3cd66e412c
PMC11341823	EZH2 represses mesenchymal genes and upholds the epithelial state of breast carcinoma cells	41419_2024_7011_MOESM5_ESM.xlsx	Deregulated_genes_EZH2i_colony-Unnamed_3		326	34	1.7826	0.000757941	0.0103615	d1aa7d4b-9ab9-5cc2-85cd-7b096a93fbf1
PMC11341823	EZH2 represses mesenchymal genes and upholds the epithelial state of breast carcinoma cells	41419_2024_7011_MOESM5_ESM.xlsx	EMT-MET_genes_EZH2i_responsive-MCF-7_Reversible_genes_in_the_EMT-MET_system_thar_are_responsive_to_EZH2i_F_2C		373	36	1.64963	0.00212787	0.0240516	698a298b-4130-56c0-8fc7-64dfcd2ae5b4
PMC11341823	EZH2 represses mesenchymal genes and upholds the epithelial state of breast carcinoma cells	41419_2024_7011_MOESM5_ESM.xlsx	MCF7_EMT-MET_reversible-Unnamed_2		742	62	1.42817	0.00261077	0.0284051	50e9bb80-cf87-53ee-bf43-2bdc23d238b3
PMC11343471	SAMD1 suppresses epithelial–mesenchymal transition pathways in pancreatic ductal adenocarcinoma	pbio.3002739.s017.xlsx	S5B-S5B_Fig_Relative_gene_expression_of_all_differential_expressed_genes_upon_SAMD1_KO		851	109	2.18922	2.91195e-15	4.86314e-13	d266436e-836c-56fd-9238-572dd4a28ea0
PMC11345674	Role of Forkhead Box P3 in IFNγ-Mediated PD-L1 Expression and Bladder Cancer Epithelial-to-Mesenchymal Transition	crc-23-0493_supplementary_table_5_suppst5.pdf	442-Unnamed_0		47	10	3.63659	0.00031892	0.00505091	315cbff6-84d8-50fa-abc3-790109aff480
PMC11345674	Role of Forkhead Box P3 in IFNγ-Mediated PD-L1 Expression and Bladder Cancer Epithelial-to-Mesenchymal Transition	crc-23-0493_supplementary_table_5_suppst5.pdf	443-Unnamed_0		47	10	3.63659	0.00031892	0.00505091	315cbff6-84d8-50fa-abc3-790109aff480
PMC11345674	Role of Forkhead Box P3 in IFNγ-Mediated PD-L1 Expression and Bladder Cancer Epithelial-to-Mesenchymal Transition	crc-23-0493_supplementary_table_5_suppst5.pdf	16-Unnamed_0		66	12	3.10763	0.000392461	0.00601252	7b11df7b-849e-50ce-a831-45caccc1c4a4
PMC11345674	Role of Forkhead Box P3 in IFNγ-Mediated PD-L1 Expression and Bladder Cancer Epithelial-to-Mesenchymal Transition	crc-23-0493_supplementary_table_5_suppst5.pdf	17-Unnamed_0		66	12	3.10763	0.000392461	0.00601252	7b11df7b-849e-50ce-a831-45caccc1c4a4
PMC11345674	Role of Forkhead Box P3 in IFNγ-Mediated PD-L1 Expression and Bladder Cancer Epithelial-to-Mesenchymal Transition	crc-23-0493_supplementary_table_5_suppst5.pdf	440-Unnamed_0		57	11	3.29845	0.00039894	0.00608302	902a28cc-6dd7-57d4-af73-623aed9b52a3
PMC11345674	Role of Forkhead Box P3 in IFNγ-Mediated PD-L1 Expression and Bladder Cancer Epithelial-to-Mesenchymal Transition	crc-23-0493_supplementary_table_5_suppst5.pdf	441-Unnamed_0		57	11	3.29845	0.00039894	0.00608302	902a28cc-6dd7-57d4-af73-623aed9b52a3
PMC11345674	Role of Forkhead Box P3 in IFNγ-Mediated PD-L1 Expression and Bladder Cancer Epithelial-to-Mesenchymal Transition	crc-23-0493_supplementary_table_5_suppst5.pdf	190-Unnamed_0		66	11	2.84866	0.00143669	0.0175179	19d13fa5-4557-51f9-ac72-2a658d725b77
PMC11345674	Role of Forkhead Box P3 in IFNγ-Mediated PD-L1 Expression and Bladder Cancer Epithelial-to-Mesenchymal Transition	crc-23-0493_supplementary_table_5_suppst5.pdf	191-Unnamed_0		66	11	2.84866	0.00143669	0.0175179	19d13fa5-4557-51f9-ac72-2a658d725b77
PMC11345674	Role of Forkhead Box P3 in IFNγ-Mediated PD-L1 Expression and Bladder Cancer Epithelial-to-Mesenchymal Transition	crc-23-0493_supplementary_table_5_suppst5.pdf	2-Unnamed_0		67	10	2.55104	0.00531117	0.0494202	495d45a9-b0a8-58b3-8557-780f18db976b
PMC11345674	Role of Forkhead Box P3 in IFNγ-Mediated PD-L1 Expression and Bladder Cancer Epithelial-to-Mesenchymal Transition	crc-23-0493_supplementary_table_5_suppst5.pdf	3-Unnamed_0		67	10	2.55104	0.00531117	0.0494202	495d45a9-b0a8-58b3-8557-780f18db976b
PMC11350481	Characterizing Relationships between T-cell Inflammation and Outcomes in Patients with High-Risk Neuroblastoma According to Mesenchymal and Adrenergic Signatures	crc-24-0214_supplementary_table_s3_supps3.docx	0-Supplementary_Table_3_Table_comparing_our_novel_adrenergic_and_mesenchymal_gene_signatures_with_previously_published_signatures_6		197	25	2.16903	0.000212867	0.00357991	d12a3382-76de-52ed-9c6e-c28f2c64a21e
PMC11350481	Characterizing Relationships between T-cell Inflammation and Outcomes in Patients with High-Risk Neuroblastoma According to Mesenchymal and Adrenergic Signatures	crc-24-0214_supplementary_table_s3_supps3.docx	0-Supplementary_Table_3_Table_comparing_our_novel_adrenergic_and_mesenchymal_gene_signatures_with_previously_published_signatures_4		228	25	1.87412	0.00183608	0.0213202	1549b836-758d-5816-afac-294ad7735c8f
PMC11358026	Human umbilical cord mesenchymal stem cell-derived treatment of severe pulmonary arterial hypertension	44161_2022_83_MOESM7_ESM.xlsx	Table_SD10-Table_SD10_-_Differentially_enriched_proteins_HUCMSC_vs_HUVEC_Cells_-_passage_3		847	81	1.63453	6.36525e-06	0.000169218	c4ac821d-5cd1-550a-a9c6-7737f14b1f78
PMC11358026	Human umbilical cord mesenchymal stem cell-derived treatment of severe pulmonary arterial hypertension	44161_2022_83_MOESM10_ESM.xlsx	Fig3C_DiffEnrichment_in_Cells-name		847	81	1.63453	6.36525e-06	0.000169218	c4ac821d-5cd1-550a-a9c6-7737f14b1f78
PMC11358026	Human umbilical cord mesenchymal stem cell-derived treatment of severe pulmonary arterial hypertension	44161_2022_83_MOESM7_ESM.xlsx	Table_SD9-Table_SD9_-_Differentially_expressed_genes_in_Cluster_7_of_integrated_scRNA-seq_analysis_of_three_HUCMSC_and_two_HUVEC_samples_passage_6		1404	107	1.30259	0.00198197	0.0226919	14b8428b-1a4f-5cae-ba47-67881b0f07df
PMC11364385	Single-cell analysis of breast cancer metastasis reveals epithelial-mesenchymal plasticity signatures associated with poor outcomes	jci-134-164227-s202.xlsx	EMP_Intermediate-gene		204	23	1.92704	0.00191355	0.022048	8eeff78d-7f9f-53f0-9429-e5b828bda42e
PMC11366763	Multi-omic lineage tracing predicts the transcriptional, epigenetic and genetic determinants of cancer evolution	41467_2024_51424_MOESM16_ESM.xlsx	meanRank_GREAT_M1-TF		1609	136	1.44469	3.47613e-06	9.8871e-05	b94103e7-6fb5-5429-8416-113e251632f8
PMC11366763	Multi-omic lineage tracing predicts the transcriptional, epigenetic and genetic determinants of cancer evolution	41467_2024_51424_MOESM16_ESM.xlsx	meanRank_RHO_M1-TF		1609	136	1.44469	3.47613e-06	9.8871e-05	b94103e7-6fb5-5429-8416-113e251632f8
PMC11368877	Global transcriptomic network analysis of the crosstalk between microbiota and cancer-related cells in the oral-gut-lung axis	Table1.xlsx	ChEA3-TF		1609	136	1.44469	3.47613e-06	9.8871e-05	b94103e7-6fb5-5429-8416-113e251632f8
PMC11368877	Global transcriptomic network analysis of the crosstalk between microbiota and cancer-related cells in the oral-gut-lung axis	Table2.xlsx	ChEA3-TF		1609	136	1.44469	3.47613e-06	9.8871e-05	b94103e7-6fb5-5429-8416-113e251632f8
PMC11368877	Global transcriptomic network analysis of the crosstalk between microbiota and cancer-related cells in the oral-gut-lung axis	Table3.xlsx	ChEA3-TF		1609	136	1.44469	3.47613e-06	9.8871e-05	b94103e7-6fb5-5429-8416-113e251632f8
PMC11371700	Identification of TIMP1-induced dysregulation of epithelial-mesenchymal transition as a key pathway in inflammatory bowel disease and small intestinal neuroendocrine tumors shared pathogenesis	Table1.xlsx	DEGs_Lists-CD_DEGs		1045	106	1.73373	9.85893e-09	5.0981e-07	748d2d7e-2bc5-5b41-bfd6-13ebededcf36
PMC11371700	Identification of TIMP1-induced dysregulation of epithelial-mesenchymal transition as a key pathway in inflammatory bowel disease and small intestinal neuroendocrine tumors shared pathogenesis	Table1.xlsx	DEGs_Lists-UC_DEGs		2097	175	1.42705	1.96659e-07	7.55695e-06	f55eb6bf-d81d-562f-90c6-bbac7551f0d6
PMC11371700	Identification of TIMP1-induced dysregulation of epithelial-mesenchymal transition as a key pathway in inflammatory bowel disease and small intestinal neuroendocrine tumors shared pathogenesis	Table2.xlsx	Common_DEGs-UC_SINET_COMMON_UPREGULATED_GENES		153	23	2.56938	2.76624e-05	0.000617567	8368b727-387f-5142-9ad3-0a15855c38a2
PMC11375884	SEPT9: From pan-cancer to lung squamous cell carcinoma	12885_2024_12877_MOESM2_ESM.xlsx	Table_S11-Table_S11_Mitotic_spindle_genes_from_the_MSigDB_portal_Related_to_Fig_9A		199	25	2.14723	0.000249244	0.00408606	abbb65e0-9615-5ad6-9d78-6c6bcd57fd6c
PMC11384551	Single-cell atlas of the small intestine throughout the human lifespan demonstrates unique features of fetal immune cells	NIHMS2017679-supplement-17.xlsx	Mesenchymal-Table_S5_Differentially_expressed_genes_between_fetal_and_postnatal_samples_in_mesenchymal_cells		902	78	1.47802	0.000271451	0.00439657	1e4ee125-b231-5a38-a013-a9040ec68f78
PMC11394813	Mesenchymal Stem Cell Therapy in Alopecia Areata: Visual and Molecular Evidence from a Mouse Model	ijms-25-09236.nxml	Table_1-Gene		12	4	5.69733	0.00394414	0.0391193	a373d2ad-3ed6-556c-b261-fd030275deb1
PMC11395970	Identification of autophagy-related genes as potential biomarkers correlated with immune infiltration in bipolar disorder: a bioinformatics analysis	12920_2024_2003_MOESM2_ESM.xlsx	Sheet1-TF		1609	136	1.44469	3.47613e-06	9.8871e-05	b94103e7-6fb5-5429-8416-113e251632f8
PMC11405519	Low frequency sinusoidal electromagnetic fields promote the osteogenic differentiation of rat bone marrow mesenchymal stem cells by modulating miR-34b-5p/STAC2	42003_2024_6866_MOESM6_ESM.xlsx	TargetScan7-Ortholog_of_target_gene		576	75	2.22939	3.72269e-11	3.07706e-09	2ba5b182-b65f-57f0-b153-2e27031241a6
PMC11425905	Anti‐CTLA‐4 m2a Antibody Exacerbates Cardiac Injury in Experimental Autoimmune Myocarditis Mice By Promoting Ccl5‐Neutrophil Infiltration	ADVS-11-2400486-s001.xlsx	Sheet1-Unnamed_5		200	27	2.30742	4.14181e-05	0.000877629	306584cc-9f04-555c-9c59-87523724e2a6
PMC11438190	Cytokine priming enhances the antifibrotic effects of human adipose derived mesenchymal stromal cells conditioned medium	13287_2024_3916_MOESM15_ESM.xlsx	Gene_Modules-Fibrosis_Module		80	13	2.77745	0.000704654	0.00977987	5a19228a-0bc2-5208-9501-12630833812e
PMC11443708	High expression of transcription factor EGR1 is associated with postoperative muscle atrophy in patients with knee osteoarthritis undergoing total knee arthroplasty	13018_2024_5109_MOESM3_ESM.xlsx	Sheet1-TF		1609	136	1.44469	3.47613e-06	9.8871e-05	b94103e7-6fb5-5429-8416-113e251632f8
PMC11467036	Mesenchymal stem cells with an enhanced antioxidant capacity integrate as smooth muscle cells in a model of diabetic detrusor underactivity	CTM2-14-e70052-s002.xlsx	Figure_3F-Unnamed_6		221	26	2.01082	0.00053048	0.00775514	e5941c40-d8f4-5e68-aa4d-d6a4732c5e25
PMC11476831	Dynamic chromatin accessibility and transcriptome changes following PDGF-BB treatment of bone-marrow derived mesenchymal stem cells	12864_2024_10861_MOESM2_ESM.xlsx	Table_S2-Unnamed_2		2424	275	1.94147	4.50211e-31	5.19002e-28	fe65a3b8-75c2-545a-8cba-fbec12e8ff9a
PMC11480806	ARID1A-BAF coordinates ZIC2 genomic occupancy for epithelial-to-mesenchymal transition in cranial neural crest specification	mmc7.xlsx	DEGs_ARID1A_D10_CNCC-Table_S6_-_Differentially_expressed_genes_in_CSS_lines_relative_to_CTRL_lines_in_D10_CNCCs		599	56	1.59791	0.000319214	0.0050542	2ccc1d19-7aac-5b44-9bdb-0dd8ee26c97f
PMC11488223	Microglia morphological response to mesenchymal stromal cell extracellular vesicles demonstrates EV therapeutic potential for modulating neuroinflammation	13036_2024_449_MOESM4_ESM.xlsx	Unprimed_vs_Positive_DAA_Result-REACTOME_CARDIAC_CONDUCTION		139	17	2.09039	0.00308552	0.0323138	7ad09b54-cecb-5889-9d82-3c810037ad59
PMC11488223	Microglia morphological response to mesenchymal stromal cell extracellular vesicles demonstrates EV therapeutic potential for modulating neuroinflammation	13036_2024_449_MOESM4_ESM.xlsx	Up-REACTOME_CARDIAC_CONDUCTION		139	17	2.09039	0.00308552	0.0323138	7ad09b54-cecb-5889-9d82-3c810037ad59
PMC11488223	Microglia morphological response to mesenchymal stromal cell extracellular vesicles demonstrates EV therapeutic potential for modulating neuroinflammation	13036_2024_449_MOESM4_ESM.xlsx	Down-REACTOME_CARDIAC_CONDUCTION		139	17	2.09039	0.00308552	0.0323138	7ad09b54-cecb-5889-9d82-3c810037ad59
PMC11488223	Microglia morphological response to mesenchymal stromal cell extracellular vesicles demonstrates EV therapeutic potential for modulating neuroinflammation	13036_2024_449_MOESM4_ESM.xlsx	Unprimed_vs_Positive_DAA_Result-KEGG_FC_GAMMA_R_MEDIATED_PHAGOCYTOSIS		96	13	2.31454	0.00381759	0.0381412	ad55a6d2-5d02-5d28-ab00-9aef061aef62
PMC11488223	Microglia morphological response to mesenchymal stromal cell extracellular vesicles demonstrates EV therapeutic potential for modulating neuroinflammation	13036_2024_449_MOESM4_ESM.xlsx	Up-KEGG_FC_GAMMA_R_MEDIATED_PHAGOCYTOSIS		96	13	2.31454	0.00381759	0.0381412	ad55a6d2-5d02-5d28-ab00-9aef061aef62
PMC11488223	Microglia morphological response to mesenchymal stromal cell extracellular vesicles demonstrates EV therapeutic potential for modulating neuroinflammation	13036_2024_449_MOESM4_ESM.xlsx	Down-KEGG_FC_GAMMA_R_MEDIATED_PHAGOCYTOSIS		96	13	2.31454	0.00381759	0.0381412	ad55a6d2-5d02-5d28-ab00-9aef061aef62
PMC11497112	The Matrix Protein Tropoelastin Prolongs Mesenchymal Stromal Cell Vitality and Delays Senescence During Replicative Aging	ADVS-11-2402168-s001.docx	0-Genes		192	27	2.40356	1.98713e-05	0.000462637	cfa87d7a-32fe-55df-a58b-580071e8f9eb
PMC11513636	Assessing personalized molecular portraits underlying endothelial-to-mesenchymal transition within pulmonary arterial hypertension	10020_2024_963_MOESM10_ESM.xlsx	Table_S4-Table_S4_Significant_EC3_marker_genes		590	64	1.85405	1.12217e-06	3.60098e-05	322e3ac8-a0b5-50a3-98b0-38425fafe027
PMC11564572	Proteomic analysis of human Wharton’s jelly mesenchymal stem/stromal cells and human amniotic epithelial stem cells: a comparison of therapeutic potential	41598_2024_79063_MOESM1_ESM.docx	0-Gene_Name		205	27	2.25114	6.3908e-05	0.00127786	7f595e81-ae02-5d35-9028-ae8dfc7e0099
PMC11566621	Astilbin improves the therapeutic effects of mesenchymal stem cells in AKI-CKD mice by regulating macrophage polarization through PTGS2-mediated pathway	13287_2024_4025_MOESM4_ESM.xlsx	Sheet1-Gene_name		719	74	1.75912	1.1883e-06	3.78951e-05	f1215c2a-b2f6-58cb-9e5a-e1dc9e071b2f
PMC11566621	Astilbin improves the therapeutic effects of mesenchymal stem cells in AKI-CKD mice by regulating macrophage polarization through PTGS2-mediated pathway	13287_2024_4025_MOESM4_ESM.xlsx	Sheet1-Gene_ID		720	74	1.75668	1.25167e-06	3.97056e-05	bcb8aa8c-31ed-5d64-80b5-36005ef5cfaf
PMC11573610	GTSE1-driven ZEB1 stabilization promotes pulmonary fibrosis through the epithelial-to-mesenchymal transition	mmc3.xlsx	GSE4760_A-GPL6480_Agilent-014850_Whole_Human_Genome_Microarray_4x44K_G4112F_Probe_Name_version		2496	207	1.41748	1.53561e-08	7.58845e-07	2e43d3d7-3946-5bcb-9a43-61830089b2b0
PMC11576426	Deciphering transcriptome patterns in porcine mesenchymal stem cells promoting phenotypic maintenance and differentiation by key driver genes	Table4.xlsx	Sheet1-Unnamed_8		401	42	1.79018	0.000174218	0.0030193	4cb989b1-341f-58ad-a1d5-da86cd2b3e9c
PMC11576426	Deciphering transcriptome patterns in porcine mesenchymal stem cells promoting phenotypic maintenance and differentiation by key driver genes	Table5.xlsx	Sheet1-Unnamed_8		203	24	2.02073	0.000797161	0.0108092	4a821f90-60e4-5dd9-a876-98e69054d16b
PMC11576426	Deciphering transcriptome patterns in porcine mesenchymal stem cells promoting phenotypic maintenance and differentiation by key driver genes	Table6.xlsx	Sheet1-Unnamed_8		461	42	1.55719	0.00280988	0.0299886	54fd67af-ebeb-5f88-9f1d-e1241e5876e7
PMC11584407	Two distinct epithelial-to-mesenchymal transition programs control invasion and inflammation in segregated tumor cell populations	43018_2024_839_MOESM3_ESM.xlsx	Supplementary_Table_2-Unnamed_3		86	12	2.38493	0.00417765	0.0407537	57cb7e6e-efa2-5163-8787-e68b117d5113
PMC11619257	NTRK fusion promotes tumor migration and invasion through epithelial–mesenchymal transition and closely interacts with ECM1 and NOVA1	12885_2024_13271_MOESM5_ESM.xlsx	Sheet_1-Unnamed_1		1421	166	1.99667	4.3571e-19	1.26922e-16	cb055a6c-7648-5602-8a49-7042eb514fc8
PMC11648501	Comparison of miRNA cargo in human adipose-tissue vs. amniotic-membrane derived mesenchymal stromal cells extracellular vesicles for osteoarthritis treatment	evcna-2-3-202-SupplementaryMaterials.pdf	21-BCL2L11		30	9	5.12759	3.61372e-05	0.000779335	b141ea58-7d02-5a80-b7e8-e86de51c38bb
PMC11648501	Comparison of miRNA cargo in human adipose-tissue vs. amniotic-membrane derived mesenchymal stromal cells extracellular vesicles for osteoarthritis treatment	evcna-2-3-202-SupplementaryMaterials.pdf	15-miR-100-5p		24	6	4.273	0.00213517	0.0240763	3bc1d595-abcd-5c55-b335-f3b1918bd50e
PMC11648501	Comparison of miRNA cargo in human adipose-tissue vs. amniotic-membrane derived mesenchymal stromal cells extracellular vesicles for osteoarthritis treatment	evcna-2-3-202-SupplementaryMaterials.pdf	26-miR-16-5p		41	8	3.33502	0.00226167	0.0252089	e339ac2d-b600-59a0-9ec5-f84811023ae7
PMC11648501	Comparison of miRNA cargo in human adipose-tissue vs. amniotic-membrane derived mesenchymal stromal cells extracellular vesicles for osteoarthritis treatment	evcna-2-3-202-SupplementaryMaterials.pdf	26-miR-197-3p		41	8	3.33502	0.00226167	0.0252089	e339ac2d-b600-59a0-9ec5-f84811023ae7
PMC11648501	Comparison of miRNA cargo in human adipose-tissue vs. amniotic-membrane derived mesenchymal stromal cells extracellular vesicles for osteoarthritis treatment	evcna-2-3-202-SupplementaryMaterials.pdf	15-miR-30b-5p		27	6	3.79822	0.00404148	0.0397395	b3ce4947-a712-5260-9c17-2d113a304cfa
PMC11648501	Comparison of miRNA cargo in human adipose-tissue vs. amniotic-membrane derived mesenchymal stromal cells extracellular vesicles for osteoarthritis treatment	evcna-2-3-202-SupplementaryMaterials.pdf	40-ACVR1B		20	5	4.273	0.00502658	0.0472164	0e7908df-3aee-56b9-be51-16a02680fdfd
PMC11648652	Intricate ribosome composition and translational reprogramming in epithelial–mesenchymal transition	pnas.2408114121.sd04.xlsx	Feuil1-Gene		96	13	2.31454	0.00381759	0.0381412	56a28933-d1f1-5f8c-b5eb-0446f837aa77
PMC11655028	The role of mesenchymal cells in cholangiocarcinoma	dmm-17-050716-TableS7.xlsx	Sheet1-Gene_ID		721	61	1.44606	0.00212452	0.0240328	ac99193e-8240-516e-a5a2-9c668d2e8c6e
PMC11655028	The role of mesenchymal cells in cholangiocarcinoma	dmm-17-050716-TableS7.xlsx	Sheet1-Gene_Symbol		721	61	1.44606	0.00212452	0.0240328	23d85136-2541-56ca-a298-1ef37fb8e6c0
PMC11656856	Transcriptome-aligned metabolic profiling by SERSome reflects biological changes following mesenchymal stem cells expansion	13287_2024_4109_MOESM2_ESM.xlsx	Figure_3a_left-Figure_3a_Heat_map_of_the_altered_mRNAs		2235	193	1.47727	2.44195e-09	1.42519e-07	c3bff93a-eb41-54e5-9159-d56f34a68cb7
PMC11673362	Canid alphaherpesvirus 1 infection alters the gene expression and secretome profile of canine adipose-derived mesenchymal stem cells in vitro	12985_2024_2603_MOESM1_ESM.pdf	1-Symbol		37	7	3.23362	0.00504	0.0472575	648dd17f-ef94-5073-909e-ed328559ae61
PMC11696141	Remodelling of the immune landscape by IFNγ counteracts IFNγ-dependent tumour escape in mouse tumour models	41467_2024_54791_MOESM3_ESM.xlsx	Signalling_Pathways-HALLMARK_INTERFERON_GAMMA_RESPONSE		200	27	2.30742	4.14181e-05	0.000877629	306584cc-9f04-555c-9c59-87523724e2a6
PMC11727170	Integrative analysis of Ewing’s sarcoma reveals that the MIF-CD74 axis is a target for immunotherapy	12964_2024_2020_MOESM1_ESM.xlsx	5signature_gene_lists-Unnamed_1		200	27	2.30742	4.14181e-05	0.000877629	306584cc-9f04-555c-9c59-87523724e2a6
PMC11727170	Integrative analysis of Ewing’s sarcoma reveals that the MIF-CD74 axis is a target for immunotherapy	12964_2024_2020_MOESM1_ESM.xlsx	5signature_gene_lists-Neutrophils		97	13	2.29068	0.00417852	0.0407537	a63e2858-8085-5347-940a-825fb4396fbd
PMC11744895	CD36 enrichment in HER2-positive mesenchymal stem cells drives therapy refractoriness in breast cancer	13046_2025_3276_MOESM2_ESM.xlsx	CSC_signatures-LIM_MaSC_ENRICHED_UP		485	57	2.00875	3.42962e-07	1.24593e-05	dee2d978-c411-5dcb-979d-5cfbe531e78c
PMC11744895	CD36 enrichment in HER2-positive mesenchymal stem cells drives therapy refractoriness in breast cancer	13046_2025_3276_MOESM2_ESM.xlsx	CSC_signatures-CREIGHTON_CD44_CD24-_low-MS_DN		239	29	2.07392	0.000152605	0.00269624	b579471e-017c-55e9-b6cf-547ac1671306
PMC11744895	CD36 enrichment in HER2-positive mesenchymal stem cells drives therapy refractoriness in breast cancer	13046_2025_3276_MOESM2_ESM.xlsx	CSC_signatures-CREIGHTON_CD44_CD24-_low-MS_UP		106	16	2.57992	0.000424141	0.00641481	19b24e75-df71-5cee-9eba-6979e62c94cd
PMC11744895	CD36 enrichment in HER2-positive mesenchymal stem cells drives therapy refractoriness in breast cancer	13046_2025_3276_MOESM2_ESM.xlsx	GO-BP_lipid-Unnamed_138		542	50	1.57675	0.000888335	0.0118242	2f08001c-fc08-5a19-90cf-f057b340298c
PMC11744895	CD36 enrichment in HER2-positive mesenchymal stem cells drives therapy refractoriness in breast cancer	13046_2025_3276_MOESM2_ESM.xlsx	GO-BP_lipid-Unnamed_74		849	71	1.42936	0.00127014	0.0158687	6708a835-e87c-54f4-a8db-7e24c9ce1a1b
PMC11744895	CD36 enrichment in HER2-positive mesenchymal stem cells drives therapy refractoriness in breast cancer	13046_2025_3276_MOESM2_ESM.xlsx	GO-BP_lipid-Unnamed_118		189	22	1.98954	0.00158272	0.0190423	45fb60aa-8a36-5608-88c3-1fa95eb60aba
PMC11758390	Identification of potential biomarkers for 2022 Mpox virus infection: a transcriptomic network analysis and machine learning approach	41598_2024_80519_MOESM4_ESM.xlsx	Sheet1-Unnamed_3		97	13	2.29068	0.00417852	0.0407537	a63e2858-8085-5347-940a-825fb4396fbd
PMC11781991	Integrative single-cell and bulk RNA-seq analyses identify CD4+ T-cell subpopulation infiltration and biomarkers of regulatory T cells involved in mediating the progression of atherosclerotic plaque	Table3.xlsx	Sheet1-TF		1609	136	1.44469	3.47613e-06	9.8871e-05	b94103e7-6fb5-5429-8416-113e251632f8
PMC11786038	Training and experimental validation a novel anoikis- and epithelial‒mesenchymal transition-related signature for evaluating prognosis and predicting immunotherapy efficacy in gastric cancer	jcav16p1078s1.xlsx	T1-Table_S1_EMT-related_genes		1011	101	1.70751	4.94491e-08	2.17827e-06	cc5ebe44-1870-5bfe-9e36-86a81de98dd4
PMC11786038	Training and experimental validation a novel anoikis- and epithelial‒mesenchymal transition-related signature for evaluating prognosis and predicting immunotherapy efficacy in gastric cancer	jcav16p1078s1.xlsx	T2-Table_S2_Anoikis-related_genes		753	78	1.77284	4.40947e-07	1.55904e-05	83fbf472-c982-579d-b931-41a85cecdbe6
PMC11787392	Selective inhibition of TGF-β-induced epithelial-mesenchymal transition overcomes chemotherapy resistance in high-risk lung squamous cell carcinoma	42003_2025_7595_MOESM3_ESM.xlsx	Supplementary_Data_2_1-Supplementary_Data_2_1_Significant_positive_and_negative_correlating_genes_with_risk_score_Spearman_R_0_3_p_0_05		922	82	1.52176	7.17841e-05	0.00141358	885aae62-033e-5128-b1c3-8c649738ebb2
PMC11787392	Selective inhibition of TGF-β-induced epithelial-mesenchymal transition overcomes chemotherapy resistance in high-risk lung squamous cell carcinoma	42003_2025_7595_MOESM3_ESM.xlsx	Supplementary_Data_2_2-Supplementary_Data_2_2_Gene_expression_zscore_in_the_EMT_PI3K-AKT_signaling_focal_adhesion_and_TGF-β_signaling_pathways		489	46	1.60783	0.000945916	0.0124582	ab8d4942-4516-5930-b457-1f0150f7d0e8
PMC11818286	Identifying differentiation markers between dermal fibroblasts and adipose-derived mesenchymal stromal cells (AD-MSCs) in human visceral and subcutaneous tissues using single-cell transcriptomics	13287_2025_4185_MOESM5_ESM.xlsx	Supp_Table_S10-Gene_Name		1467	132	1.53793	1.76269e-07	6.8403e-06	6a7091ae-5f7c-5b30-a0b0-c9fc864ce5cf
PMC11818286	Identifying differentiation markers between dermal fibroblasts and adipose-derived mesenchymal stromal cells (AD-MSCs) in human visceral and subcutaneous tissues using single-cell transcriptomics	13287_2025_4185_MOESM6_ESM.xlsx	Supp_Table_S5-Gene_Name		271	28	1.76596	0.00244821	0.0269059	ef83393a-8ea5-52e6-bde5-30b936105602
PMC11840472	Effects of oxidized LDL versus IL‐1ß/TNF‐ɑ/INFɣ on human gingival mesenchymal stem cells properties	JRE-60-77-s002.xlsx	Cytokine_Treatment_Day_3-Geneid		518	47	1.55082	0.00175973	0.0207008	6809c6f1-9756-5532-8a56-7feee015f93e
PMC11841332	Endothelial-mesenchymal crosstalk drives osteogenic differentiation of human osteoblasts through Notch signaling	12964_2025_2096_MOESM3_ESM.xlsx	direct_vs_control_up-Unnamed_0		779	130	2.85232	1.11606e-28	1.01386e-25	21f03916-3b1b-5e0a-8bd5-1a633158dc27
PMC11841332	Endothelial-mesenchymal crosstalk drives osteogenic differentiation of human osteoblasts through Notch signaling	12964_2025_2096_MOESM5_ESM.xlsx	direct_vs_control_up-Unnamed_0		1004	129	2.19608	4.1908e-18	1.06496e-15	318e531c-3212-570a-8788-c0cbb62fd229
PMC11841332	Endothelial-mesenchymal crosstalk drives osteogenic differentiation of human osteoblasts through Notch signaling	12964_2025_2096_MOESM4_ESM.xlsx	indirect_vs_control_down-Unnamed_0		282	53	3.21232	2.57778e-14	3.71449e-12	f9e82639-c7a1-531e-a9ed-8d4cd47f8ab1
PMC11841332	Endothelial-mesenchymal crosstalk drives osteogenic differentiation of human osteoblasts through Notch signaling	12964_2025_2096_MOESM4_ESM.xlsx	indirect_vs_control_up-Unnamed_0		296	40	2.30973	6.1914e-07	2.11123e-05	ae034224-554b-52be-8a67-8f3450eeddce
PMC11841332	Endothelial-mesenchymal crosstalk drives osteogenic differentiation of human osteoblasts through Notch signaling	12964_2025_2096_MOESM5_ESM.xlsx	direct_vs_control_down-Unnamed_0		449	44	1.67494	0.000525945	0.00769507	550dfd0b-262e-5c06-a41b-e52863a84b51
PMC11841332	Endothelial-mesenchymal crosstalk drives osteogenic differentiation of human osteoblasts through Notch signaling	12964_2025_2096_MOESM6_ESM.xlsx	indirect_vs_control_down-Unnamed_0		36	7	3.32344	0.00429932	0.0416965	b92775f5-4fe8-5d1f-93c4-563cd80fec94
PMC11847473	Hsa-miR-532-3p protects human decidual mesenchymal stem cells from oxidative stress in recurrent spontaneous abortion via targeting KEAP1	mmc4.docx	0-Target_gene		698	59	1.44474	0.00255327	0.0278839	8d785e3a-7a7d-53fa-9d61-3f67c58daf35
PMC11871789	Thrombin-preconditioned mesenchymal stromal cell-derived extracellular vesicles attenuate experimental necrotizing enterocolitis	13287_2025_4243_MOESM4_ESM.xlsx	Selected_Gene_List_Fold_Change-GO_0071711_basement_membrane_organization		5	3	10.2552	0.00182554	0.0212548	3000dd73-5e01-558a-8761-3786bfe4d8a6
PMC11871789	Thrombin-preconditioned mesenchymal stromal cell-derived extracellular vesicles attenuate experimental necrotizing enterocolitis	13287_2025_4243_MOESM4_ESM.xlsx	Top30_Gene_List_Fold_Change-GO_0007155_cell_adhesion		51	9	3.01623	0.00254425	0.0278052	82744c69-7fd1-5efc-9ab9-6496afd8b351
PMC11880019	CD8α and CD70 mark human natural killer cell populations which differ in cytotoxicity	Table2.xlsx	HALLMARK_MITOTIC_SPINDLE-SYMBOL		199	25	2.14723	0.000249244	0.00408606	abbb65e0-9615-5ad6-9d78-6c6bcd57fd6c
PMC11906049	Impact of spaceflight on gene expression in cultured human mesenchymal stem/stromal cells	pone.0315285.s001.xlsx	Week2-vs_Week1_DEG-Supplemental_Table_3_Differentially_expressed_genes_in_the_week_2_vs_week_1_comparison_log2FoldChange_0_585_adjusted_p-value_0_05		433	46	1.81578	6.16891e-05	0.00124115	8e3632e1-ecf5-5545-8563-84f54a047343
PMC11906049	Impact of spaceflight on gene expression in cultured human mesenchymal stem/stromal cells	pone.0315285.s001.xlsx	Week2-vs_Week1_DEG-Unnamed_1		429	44	1.75302	0.000196785	0.0033437	91865db5-619f-5820-ad79-bfcc5d168f7f
PMC11906049	Impact of spaceflight on gene expression in cultured human mesenchymal stem/stromal cells	pone.0315285.s001.xlsx	ISS-vs-Ground_Week2_DEG-Unnamed_1		195	22	1.92833	0.00235448	0.0260144	3048a3c0-49e9-5aa2-92a3-8c0b2960b2a1
PMC11925600	Interferon regulatory factor 5 suppresses epithelial‐to‐mesenchymal transition and metastasis by inducing GATA2 expression in colorectal cancer	CTM2-15-e70077-s001.docx	3-HCT15		34	8	4.02164	0.000617882	0.00876158	080d96bd-e93c-5408-af14-fcc415f3c8bd
PMC11930488	The Impact of Obesity on Autophagy in Human Adipose-Derived Mesenchymal Stromal Cells	sj-docx-1-cll-10.1177_09636897251323339.docx	0-Autophagy_GO_0006914_MGI_AmiGO_2		498	55	1.89528	3.37031e-06	9.6115e-05	180e02d4-fb82-55c5-abda-098089babc9d
PMC11930488	The Impact of Obesity on Autophagy in Human Adipose-Derived Mesenchymal Stromal Cells	sj-docx-1-cll-10.1177_09636897251323339.docx	0-Autophagy_GO_0006914_AmiGO_2_Human		299	34	1.94357	0.000154262	0.00272012	25e513a7-dd17-5160-981c-7eb726ab40c5
PMC11930814	The potential key genes within focal adhesion that regulate mesenchymal stem cells osteogenesis or adipogenesis in microgravity related disuse osteoporosis: an integrated analysis	Table2.csv	hsa04510_Focal_adhesion		203	22	1.85233	0.00385949	0.0384909	db2bed29-54d6-5196-91e9-44c1d3edce72
PMC11933197	Placental mesenchymal stem cell–derived exosomes treat endometrial injury in a rat model of intrauterine adhesions	438_2025_2241_MOESM1_ESM.xlsx	Supplementary_Table_4-Unnamed_1		154	21	2.33072	0.000249174	0.00408578	495e5de3-8369-5f6b-923d-21dceabf72d5
PMC11949045	APOBEC3A drives ovarian cancer metastasis by altering epithelial-mesenchymal transition	jciinsight-10-186409-s164.xlsx	OVCAR4_A3A_V2-OVCAR4_A3A_V2_DEGs_UP		251	35	2.38334	1.49742e-06	4.66509e-05	11f7a807-0daf-5699-9633-6e99407408f9
PMC11949045	APOBEC3A drives ovarian cancer metastasis by altering epithelial-mesenchymal transition	jciinsight-10-186409-s164.xlsx	OVCAR4_A3A_V2-Unnamed_2		251	35	2.38334	1.49742e-06	4.66509e-05	11f7a807-0daf-5699-9633-6e99407408f9
PMC11949045	APOBEC3A drives ovarian cancer metastasis by altering epithelial-mesenchymal transition	jciinsight-10-186409-s164.xlsx	OVCAR4_A3A_V3-Unnamed_2		271	35	2.20745	8.59317e-06	0.000220966	c1e8e1f7-ac2b-5962-83f2-9e3fefaa8ad4
PMC11949045	APOBEC3A drives ovarian cancer metastasis by altering epithelial-mesenchymal transition	jciinsight-10-186409-s164.xlsx	OVCAR4_A3A_V3-Unnamed_0		272	35	2.19934	9.32161e-06	0.000237418	1b6b549f-8134-5fe5-84dd-7295a6e3a111
PMC11949045	APOBEC3A drives ovarian cancer metastasis by altering epithelial-mesenchymal transition	jciinsight-10-186409-s164.xlsx	OVCAR3_A3A_V1-Unnamed_9		250	33	2.25614	9.75315e-06	0.000247191	c871f3b5-71c8-5042-b8d4-c2b5f4e329b2
PMC11949045	APOBEC3A drives ovarian cancer metastasis by altering epithelial-mesenchymal transition	jciinsight-10-186409-s164.xlsx	OVCAR3_A3A_V1-OVCAR3_A3A_V1_DEGs_DN		251	33	2.24715	1.06146e-05	0.000266345	ffe6c255-8134-513a-a4c1-f2b8f2df4d6d
PMC11949045	APOBEC3A drives ovarian cancer metastasis by altering epithelial-mesenchymal transition	jciinsight-10-186409-s163.xlsx	OVCAR4_A3A_V1-Gene		709	66	1.59107	0.000106477	0.00198675	e376d87b-777f-51e5-b0ad-e2830cb05a01
PMC11949045	APOBEC3A drives ovarian cancer metastasis by altering epithelial-mesenchymal transition	jciinsight-10-186409-s164.xlsx	OVCAR4_A3A_V1-OVCAR4_A3A_V1_DEGs_DN		158	20	2.16354	0.000910027	0.0120721	4376c20e-dcaf-5b31-858e-53570f1023c5
PMC11949045	APOBEC3A drives ovarian cancer metastasis by altering epithelial-mesenchymal transition	jciinsight-10-186409-s164.xlsx	OVCAR4_A3A_V1-Unnamed_9		158	20	2.16354	0.000910027	0.0120721	4376c20e-dcaf-5b31-858e-53570f1023c5
PMC11951066	Fibrosis-Related Gene and Protein Expression in Normal and Glaucomatous Trabecular Meshwork Cells	iovs-66-3-48_s002.xlsx	Table_S1-Unnamed_1		754	76	1.7228	1.86472e-06	5.68129e-05	1df58e43-22b1-5c2d-976a-5a3bebf6d7b6
PMC11956947	Antigenic cancer persister cells survive direct T cell attack	media-4.xlsx	C_GSEA_gene_sets-HALLMARK_UV_RESPONSE_DN		144	31	3.67952	1.91406e-10	1.38791e-08	8eb61553-8184-5ae6-bc69-5fd71bb88020
PMC11956947	Antigenic cancer persister cells survive direct T cell attack	media-4.xlsx	C_GSEA_gene_sets-HALLMARK_INTERFERON_GAMMA_RESPONSE		200	27	2.30742	4.14181e-05	0.000877629	306584cc-9f04-555c-9c59-87523724e2a6
PMC11956947	Antigenic cancer persister cells survive direct T cell attack	media-4.xlsx	C_GSEA_gene_sets-HALLMARK_KRAS_SIGNALING_UP		200	26	2.22196	0.000107886	0.00200845	d026b43b-724d-5d8b-8cec-5914c9207998
PMC11956947	Antigenic cancer persister cells survive direct T cell attack	media-4.xlsx	C_GSEA_gene_sets-HALLMARK_MITOTIC_SPINDLE		199	25	2.14723	0.000249244	0.00408606	abbb65e0-9615-5ad6-9d78-6c6bcd57fd6c
PMC11956947	Antigenic cancer persister cells survive direct T cell attack	media-4.xlsx	D_Full_melanoma_cell_states-Mesenchymal-like		160	21	2.24332	0.000421863	0.00638953	5c4891a8-4ce1-5f2e-96b5-b558557e6fd7
PMC11956947	Antigenic cancer persister cells survive direct T cell attack	media-4.xlsx	C_GSEA_gene_sets-HALLMARK_ESTROGEN_RESPONSE_EARLY		200	23	1.96558	0.00147383	0.017908	a66ee8d0-6d6f-575d-930b-53f3f3733ffe
PMC11956947	Antigenic cancer persister cells survive direct T cell attack	media-4.xlsx	C_GSEA_gene_sets-HALLMARK_INTERFERON_ALPHA_RESPONSE		97	13	2.29068	0.00417852	0.0407537	a63e2858-8085-5347-940a-825fb4396fbd
PMC11961634	Mechanical sensing protein PIEZO1 controls osteoarthritis via glycolysis mediated mesenchymal stem cells-Th17 cells crosstalk	41419_2025_7577_MOESM3_ESM.xls	Sheet1-Unnamed_0		636	65	1.74682	6.86947e-06	0.000181037	ff6760d5-0554-59a6-8016-644ec796283a
PMC11968874	Genome-wide screening and validation of exosome-derived TLN1 as a regulator of epithelial–mesenchymal transition in lung cancer	41598_2025_96210_MOESM1_ESM.pdf	15-HES1		51	13	4.35678	5.14175e-06	0.00014015	bf8445a3-59a6-5ecc-84bf-0ff426709f56
PMC11968874	Genome-wide screening and validation of exosome-derived TLN1 as a regulator of epithelial–mesenchymal transition in lung cancer	41598_2025_96210_MOESM1_ESM.pdf	5-JAG2		51	9	3.01623	0.00254425	0.0278052	3bc70cf7-c498-57c5-b112-11e74ccb20e1
PMC11979991	Modeling a mesenchymal cell state by bioprinting for the molecular analysis of dormancy in melanoma	mmc1.xlsx	8_Pozniak_et_al_CellTypeCluster-gene		1451	123	1.44887	9.82349e-06	0.000248649	dec5bb96-0ba4-5de1-8f5c-7efc0b66ebb9
PMC11982252	Chaperone-mediated autophagy regulates the metastatic state of mesenchymal tumors	44321_2025_Article_210.nxml	Table_1-Proteins		97	22	3.87653	3.03942e-08	1.40504e-06	ea5bd98e-c0aa-5beb-a254-72d2f5b2a0ed
PMC11982489	Versatile roles of annexin A4 in clear cell renal cell carcinoma: Impact on membrane repair, transcriptional signatures, and composition of the tumor microenvironment	mmc8.xlsx	ChEA3-TF		1609	136	1.44469	3.47613e-06	9.8871e-05	b94103e7-6fb5-5429-8416-113e251632f8
PMC11982489	Versatile roles of annexin A4 in clear cell renal cell carcinoma: Impact on membrane repair, transcriptional signatures, and composition of the tumor microenvironment	mmc8.xlsx	ChEA3-TF_1		1609	136	1.44469	3.47613e-06	9.8871e-05	b94103e7-6fb5-5429-8416-113e251632f8
PMC12010622	Footprint-free induced pluripotent stem cells can be successfully differentiated into mesenchymal stromal cells in the feline model	13287_2025_4325_MOESM7_ESM.xlsx	Up_regulated_genes_IPSCs-MSCs-Symbol		534	75	2.40056	9.70261e-13	1.06649e-10	a3c6a58a-7d8e-53ed-bf5f-e872d41a4355
PMC12015367	RXFP2-positive mesenchymal stem cells in the antlerogenic periosteum contribute to postnatal development of deer antlers	42003_2025_8085_MOESM2_ESM.xlsx	Fig2A-LP		2142	287	2.29117	2.05314e-46	8.95053e-43	7159ecde-018d-5bb5-b15f-f3063b6b902d
PMC12015367	RXFP2-positive mesenchymal stem cells in the antlerogenic periosteum contribute to postnatal development of deer antlers	42003_2025_8085_MOESM2_ESM.xlsx	Fig2A-AP-f		2494	284	1.94632	1.85258e-32	2.42286e-29	199a9c45-94bc-5682-8b18-e9a0876a1454
PMC12033297	MMP1-induced NF-κB activation promotes epithelial–mesenchymal transition and sacituzumab govitecan resistance in hormone receptor-positive breast cancer	41419_2025_7615_MOESM2_ESM.pdf	11-SERTAD4		48	10	3.56083	0.000381997	0.00587774	f381d027-2ff5-5bd2-9fa8-b36ad0df0a21
PMC12065328	Knockdown of eIF3a alleviates pulmonary arterial hypertension by inhibiting endothelial-to-mesenchymal transition via TGFβ1/SMAD pathway	12967_2025_6505_MOESM1_ESM.pdf	3-UPF3B		43	8	3.1799	0.00309549	0.0323321	dce9efb8-3480-5149-acc1-b8cab5b359da
PMC12067392	Circulating tumor cells share RNA modules with early embryo trophectoderm and with metastatic cancer	CAC2-45-500-s001.xlsx	Suppl_Table_S4-Supplementary_Table_S4_Distinctive_genes_for_mesenchymal_CTCs		339	33	1.66382	0.00279346	0.0298365	090ae04b-e0e1-5b9d-8b17-ae7c50964740
PMC12068558	Unveiling the role of KSHV-infected human mesenchymal stem cells in Kaposi’s sarcoma initiation	NIHMS2045162-supplement-Supplementary_Table_2.xls	GO_MSC-KSvsMSC-KSHVKS_Long-Unnamed_15		240	34	2.42136	1.46749e-06	4.58163e-05	1f4659ab-d136-51a2-857c-19301cbcab33
PMC12068558	Unveiling the role of KSHV-infected human mesenchymal stem cells in Kaposi’s sarcoma initiation	NIHMS2045162-supplement-Supplementary_Table_2.xls	GO_MSC-KSvsMSC-KSHVKS_Long-Unnamed_13		200	30	2.5638	1.83793e-06	5.60572e-05	e268d103-56e8-566d-9696-1eede229f79f
PMC12068558	Unveiling the role of KSHV-infected human mesenchymal stem cells in Kaposi’s sarcoma initiation	NIHMS2045162-supplement-Supplementary_Table_2.xls	GO_MSC-MEMvsMSC-KSHVMEM_Long-Unnamed_11		222	32	2.46371	2.03588e-06	6.14303e-05	d3a5bca2-c8d3-5d55-b25d-b7523588cb8e
PMC12068558	Unveiling the role of KSHV-infected human mesenchymal stem cells in Kaposi’s sarcoma initiation	NIHMS2045162-supplement-Supplementary_Table_2.xls	GO_MSC-KSvsMSC-KSHVKS_Long-Unnamed_10		124	22	3.03245	2.70979e-06	7.92249e-05	fce5cba1-9ede-55eb-bfc3-c2e4faf391fd
PMC12068558	Unveiling the role of KSHV-infected human mesenchymal stem cells in Kaposi’s sarcoma initiation	NIHMS2045162-supplement-Supplementary_Table_2.xls	GO_MSC-KSvsMSC-KSHVKS_Long-Unnamed_19		247	34	2.35274	2.82696e-06	8.23066e-05	033dea65-fc32-5a8a-9e69-0a842aedaca9
PMC12068558	Unveiling the role of KSHV-infected human mesenchymal stem cells in Kaposi’s sarcoma initiation	NIHMS2045162-supplement-Supplementary_Table_2.xls	GO_MSC-KSvsMSC-KSHVKS_Long-Unnamed_14		228	32	2.39887	3.63703e-06	0.000102938	9b256cdd-103a-5f37-b685-c825fa22ddc2
PMC12068558	Unveiling the role of KSHV-infected human mesenchymal stem cells in Kaposi’s sarcoma initiation	NIHMS2045162-supplement-Supplementary_Table_4.xls	GO_MEMKSHV_KSKSHV_long_term-Unnamed_20		93	18	3.30813	6.13727e-06	0.00016402	837b31c2-36b8-5988-9b6f-9c5fb1d02e4d
PMC12068558	Unveiling the role of KSHV-infected human mesenchymal stem cells in Kaposi’s sarcoma initiation	NIHMS2045162-supplement-Supplementary_Table_2.xls	GO_MSC-KSvsMSC-KSHVKS_Long-Unnamed_20		246	33	2.29283	6.90992e-06	0.000181799	88e75f6f-e015-5477-910b-430941d726e5
PMC12068558	Unveiling the role of KSHV-infected human mesenchymal stem cells in Kaposi’s sarcoma initiation	NIHMS2045162-supplement-Supplementary_Table_2.xls	GO_MSC-KSvsMSC-KSHVKS_Long-Unnamed_28		251	33	2.24715	1.06146e-05	0.000266345	2641fb80-83fc-5be5-9cb0-fbc6b325ae48
PMC12068558	Unveiling the role of KSHV-infected human mesenchymal stem cells in Kaposi’s sarcoma initiation	NIHMS2045162-supplement-Supplementary_Table_2.xls	GO_MSC-MEMvsMSC-KSHVMEM_Long-Unnamed_14		322	39	2.07015	1.24089e-05	0.000306183	8b8a30c5-dfb8-5ca7-b4ee-75071607b2ce
PMC12068558	Unveiling the role of KSHV-infected human mesenchymal stem cells in Kaposi’s sarcoma initiation	NIHMS2045162-supplement-Supplementary_Table_2.xls	GO_MSC-MEMvsMSC-KSHVMEM_Long-Unnamed_32		360	42	1.99406	1.45798e-05	0.000352557	06b43f40-4f0c-5bd0-8aa8-1c8fc98eca4d
PMC12068558	Unveiling the role of KSHV-infected human mesenchymal stem cells in Kaposi’s sarcoma initiation	NIHMS2045162-supplement-Supplementary_Table_4.xls	GO_MEMKSHV_KSKSHV_short_term-Unnamed_20		91	17	3.19301	1.80229e-05	0.000424555	423b30c8-cfca-53e7-9a48-ed43c598c91e
PMC12068558	Unveiling the role of KSHV-infected human mesenchymal stem cells in Kaposi’s sarcoma initiation	NIHMS2045162-supplement-Supplementary_Table_2.xls	GO_MSC-MEMvsMSC-KSHVMEM_Long-Unnamed_21		377	43	1.94948	2.01325e-05	0.000467887	9650530f-7a0a-59ce-b3b5-3b0d634ef7d4
PMC12068558	Unveiling the role of KSHV-infected human mesenchymal stem cells in Kaposi’s sarcoma initiation	NIHMS2045162-supplement-Supplementary_Table_2.xls	GO_MSC-MEMvsMSC-KSHVMEM_Long-Unnamed_55		241	31	2.19855	3.00284e-05	0.000662858	42b2107a-d6e6-5d23-bd21-eff74dc32dd5
PMC12068558	Unveiling the role of KSHV-infected human mesenchymal stem cells in Kaposi’s sarcoma initiation	NIHMS2045162-supplement-Supplementary_Table_2.xls	GO_MSC-MEMvsMSC-KSHVMEM_Long-Unnamed_16		361	41	1.94119	3.44946e-05	0.000748005	8ee61292-dede-578d-ba99-b4ab90a41143
PMC12068558	Unveiling the role of KSHV-infected human mesenchymal stem cells in Kaposi’s sarcoma initiation	NIHMS2045162-supplement-Supplementary_Table_2.xls	GO_MSC-MEMvsMSC-KSHVMEM_Long-Unnamed_65		201	27	2.29594	4.52395e-05	0.000948154	ce2e3b69-4005-5066-ab6d-97b5fe450aa4
PMC12068558	Unveiling the role of KSHV-infected human mesenchymal stem cells in Kaposi’s sarcoma initiation	NIHMS2045162-supplement-Supplementary_Table_2.xls	GO_MSC-KSvsMSC-KSHVKS_Long-Unnamed_12		192	26	2.31454	5.4199e-05	0.00110892	58c44eb0-3fee-5af0-b33b-d63d16bb9026
PMC12068558	Unveiling the role of KSHV-infected human mesenchymal stem cells in Kaposi’s sarcoma initiation	NIHMS2045162-supplement-Supplementary_Table_2.xls	GO_MSC-MEMvsMSC-KSHVMEM_Long-Unnamed_12		275	33	2.05104	6.84225e-05	0.00135633	47839f07-3001-5732-b037-255c09ab6733
PMC12068558	Unveiling the role of KSHV-infected human mesenchymal stem cells in Kaposi’s sarcoma initiation	NIHMS2045162-supplement-Supplementary_Table_2.xls	GO_MSC-MEMvsMSC-KSHVMEM_Long-Unnamed_25		362	40	1.88862	7.89292e-05	0.00153433	772ab0d4-42e9-5a36-ab4a-6eaacb6e89e9
PMC12068558	Unveiling the role of KSHV-infected human mesenchymal stem cells in Kaposi’s sarcoma initiation	NIHMS2045162-supplement-Supplementary_Table_2.xls	GO_MSC-KSvsMSC-KSHVKS_Long-Unnamed_17		242	30	2.11884	8.00037e-05	0.00155168	f939c81e-0725-52cf-b1c3-58989e596930
PMC12068558	Unveiling the role of KSHV-infected human mesenchymal stem cells in Kaposi’s sarcoma initiation	NIHMS2045162-supplement-Supplementary_Table_2.xls	GO_MSC-KSvsMSC-KSHVKS_Long-Unnamed_11		153	22	2.45767	8.13498e-05	0.00157488	ca69a76b-4bb9-5cae-92c3-c56fba5d7b85
PMC12068558	Unveiling the role of KSHV-infected human mesenchymal stem cells in Kaposi’s sarcoma initiation	NIHMS2045162-supplement-Supplementary_Table_2.xls	GO_MSC-MEMvsMSC-KSHVMEM_Long-Unnamed_40		317	36	1.94105	0.000102426	0.00191908	1ab4e071-71ff-50b0-b0f3-5dd68e123aa1
PMC12068558	Unveiling the role of KSHV-infected human mesenchymal stem cells in Kaposi’s sarcoma initiation	NIHMS2045162-supplement-Supplementary_Table_2.xls	GO_MSC-KSvsMSC-KSHVKS_Long-Unnamed_18		258	31	2.05369	0.000109858	0.0020381	8b8a54fa-f542-5626-8faa-5480862d8913
PMC12068558	Unveiling the role of KSHV-infected human mesenchymal stem cells in Kaposi’s sarcoma initiation	NIHMS2045162-supplement-Supplementary_Table_2.xls	GO_MSC-KSvsMSC-KSHVKS_Long-Unnamed_16		239	29	2.07392	0.000152605	0.00269624	5ea909bc-556d-53eb-8b8f-f357ca7ce958
PMC12068558	Unveiling the role of KSHV-infected human mesenchymal stem cells in Kaposi’s sarcoma initiation	NIHMS2045162-supplement-Supplementary_Table_2.xls	GO_MSC-MEMvsMSC-KSHVMEM_Long-Unnamed_46		299	34	1.94357	0.000154262	0.00272012	c2192969-05e9-56fa-85cc-c04b7a56c07f
PMC12068558	Unveiling the role of KSHV-infected human mesenchymal stem cells in Kaposi’s sarcoma initiation	NIHMS2045162-supplement-Supplementary_Table_2.xls	GO_MSC-MEMvsMSC-KSHVMEM_Long-Unnamed_15		339	37	1.8655	0.000185695	0.0031871	9ec80e40-0e12-5270-9826-42de53801301
PMC12068558	Unveiling the role of KSHV-infected human mesenchymal stem cells in Kaposi’s sarcoma initiation	NIHMS2045162-supplement-Supplementary_Table_2.xls	GO_MSC-MEMvsMSC-KSHVMEM_Short-Unnamed_16		89	15	2.88067	0.000186319	0.00319535	34c576e7-df7b-5fa0-926f-0fcd4c9a9b9a
PMC12068558	Unveiling the role of KSHV-infected human mesenchymal stem cells in Kaposi’s sarcoma initiation	NIHMS2045162-supplement-Supplementary_Table_2.xls	GO_MSC-MEMvsMSC-KSHVMEM_Long-Unnamed_36		328	36	1.87595	0.000202444	0.00343117	cb27d237-b226-5f41-bf76-dfa46a500a59
PMC12068558	Unveiling the role of KSHV-infected human mesenchymal stem cells in Kaposi’s sarcoma initiation	NIHMS2045162-supplement-Supplementary_Table_2.xls	GO_MSC-MEMvsMSC-KSHVMEM_Long-Unnamed_22		368	39	1.81138	0.000231468	0.00384399	173b54ab-e3ce-5cbd-902b-be26de4c78f8
PMC12068558	Unveiling the role of KSHV-infected human mesenchymal stem cells in Kaposi’s sarcoma initiation	NIHMS2045162-supplement-Supplementary_Table_2.xls	GO_MSC-MEMvsMSC-KSHVMEM_Long-Unnamed_56		237	28	2.01931	0.000307546	0.00489582	34cf7af0-b1e2-5fd3-ba7e-2b82667332f9
PMC12068558	Unveiling the role of KSHV-infected human mesenchymal stem cells in Kaposi’s sarcoma initiation	NIHMS2045162-supplement-Supplementary_Table_2.xls	GO_MSC-MEMvsMSC-KSHVMEM_Long-Unnamed_20		374	39	1.78232	0.000321271	0.00508402	830500ac-a3b6-53be-addd-15c60e84914a
PMC12068558	Unveiling the role of KSHV-infected human mesenchymal stem cells in Kaposi’s sarcoma initiation	NIHMS2045162-supplement-Supplementary_Table_4.xls	GO_MEMKSHV_KSKSHV_long_term-Unnamed_12		75	13	2.96261	0.000370889	0.00574069	27b3eda6-9117-5da2-9ead-540e0dd9a268
PMC12068558	Unveiling the role of KSHV-infected human mesenchymal stem cells in Kaposi’s sarcoma initiation	NIHMS2045162-supplement-Supplementary_Table_2.xls	GO_MSC-KSvsMSC-KSHVKS_Long-Unnamed_41		218	26	2.03849	0.000429917	0.00648962	46fa528c-300d-50b4-b49f-4bd59f960776
PMC12068558	Unveiling the role of KSHV-infected human mesenchymal stem cells in Kaposi’s sarcoma initiation	NIHMS2045162-supplement-Supplementary_Table_2.xls	GO_MSC-MEMvsMSC-KSHVMEM_Long-Unnamed_17		368	38	1.76493	0.000461918	0.006891	ab2f9ff6-c026-5cf7-a5e3-e5e21f060066
PMC12068558	Unveiling the role of KSHV-infected human mesenchymal stem cells in Kaposi’s sarcoma initiation	NIHMS2045162-supplement-Supplementary_Table_2.xls	GO_MSC-KSvsMSC-KSHVKS_Long-Unnamed_24		256	29	1.9362	0.000488814	0.00723469	e1c3ad92-b56d-566d-976d-5afe44cf8653
PMC12068558	Unveiling the role of KSHV-infected human mesenchymal stem cells in Kaposi’s sarcoma initiation	NIHMS2045162-supplement-Supplementary_Table_2.xls	GO_MSC-MEMvsMSC-KSHVMEM_Long-Unnamed_13		296	32	1.84778	0.000583102	0.00837036	bfac8860-0add-5a84-8a23-e8636832adbe
PMC12068558	Unveiling the role of KSHV-infected human mesenchymal stem cells in Kaposi’s sarcoma initiation	NIHMS2045162-supplement-Supplementary_Table_2.xls	GO_MSC-KSvsMSC-KSHVKS_Long-Unnamed_26		259	29	1.91377	0.000591174	0.00846046	b6a78b74-cb91-5c64-95fe-fec665479f71
PMC12068558	Unveiling the role of KSHV-infected human mesenchymal stem cells in Kaposi’s sarcoma initiation	NIHMS2045162-supplement-Supplementary_Table_2.xls	GO_MSC-MEMvsMSC-KSHVMEM_Long-Unnamed_24		361	37	1.75181	0.000628236	0.00888756	faa9ee78-46dc-5376-a3d8-097473a767c8
PMC12068558	Unveiling the role of KSHV-infected human mesenchymal stem cells in Kaposi’s sarcoma initiation	NIHMS2045162-supplement-Supplementary_Table_4.xls	GO_MEMKSHV_KSKSHV_short_term-Unnamed_12		71	12	2.88879	0.000780139	0.0106158	4be76365-1fc6-5a4e-a9c3-31a905400eb5
PMC12068558	Unveiling the role of KSHV-infected human mesenchymal stem cells in Kaposi’s sarcoma initiation	NIHMS2045162-supplement-Supplementary_Table_2.xls	GO_MSC-MEMvsMSC-KSHVMEM_Long-Unnamed_49		277	30	1.85112	0.000829864	0.0112022	924ce985-9234-5284-9672-b7c613a6fbff
PMC12068558	Unveiling the role of KSHV-infected human mesenchymal stem cells in Kaposi’s sarcoma initiation	NIHMS2045162-supplement-Supplementary_Table_2.xls	GO_MSC-KSvsMSC-KSHVKS_Long-Unnamed_32		241	27	1.91487	0.000892362	0.0118718	301f3a8d-28b2-5870-95d4-b36f98036e10
PMC12068558	Unveiling the role of KSHV-infected human mesenchymal stem cells in Kaposi’s sarcoma initiation	NIHMS2045162-supplement-Supplementary_Table_2.xls	GO_MSC-MEMvsMSC-KSHVMEM_Long-Unnamed_28		355	36	1.73327	0.000897105	0.0119232	86e561e8-6750-5aeb-9fb0-08801b6f2247
PMC12068558	Unveiling the role of KSHV-infected human mesenchymal stem cells in Kaposi’s sarcoma initiation	NIHMS2045162-supplement-Supplementary_Table_2.xls	GO_MSC-MEMvsMSC-KSHVMEM_Long-Unnamed_37		331	34	1.75567	0.000988249	0.0129351	8344a0d6-5b9e-52d6-aa6f-79c656d8fda0
PMC12068558	Unveiling the role of KSHV-infected human mesenchymal stem cells in Kaposi’s sarcoma initiation	NIHMS2045162-supplement-Supplementary_Table_2.xls	GO_MSC-MEMvsMSC-KSHVMEM_Long-Unnamed_10		171	21	2.09902	0.0010176	0.0132228	6ebf7a2b-5ba1-55cc-969e-e7582ca3c1b2
PMC12068558	Unveiling the role of KSHV-infected human mesenchymal stem cells in Kaposi’s sarcoma initiation	NIHMS2045162-supplement-Supplementary_Table_4.xls	GO_MEMKSHV_KSKSHV_long_term-Unnamed_16		94	14	2.54561	0.00108774	0.0140146	465ac7b8-c5bf-5124-afd0-2bc32cc0814c
PMC12068558	Unveiling the role of KSHV-infected human mesenchymal stem cells in Kaposi’s sarcoma initiation	NIHMS2045162-supplement-Supplementary_Table_2.xls	GO_MSC-KSvsMSC-KSHVKS_Short-Unnamed_93		9	4	7.59644	0.00115654	0.0147021	d4bcd055-3207-5589-99c8-fee9687edc64
PMC12068558	Unveiling the role of KSHV-infected human mesenchymal stem cells in Kaposi’s sarcoma initiation	NIHMS2045162-supplement-Supplementary_Table_2.xls	GO_MSC-KSvsMSC-KSHVKS_Long-Unnamed_43		209	24	1.96272	0.00119944	0.0151567	f94aa74e-7f0c-5867-a3ec-e09aab5fd40d
PMC12068558	Unveiling the role of KSHV-infected human mesenchymal stem cells in Kaposi’s sarcoma initiation	NIHMS2045162-supplement-Supplementary_Table_4.xls	GO_MEMKSHV_KSKSHV_short_term-Unnamed_16		95	14	2.51882	0.00120855	0.0152492	1c9509ed-7bc8-5bf5-8622-319430ce831b
PMC12068558	Unveiling the role of KSHV-infected human mesenchymal stem cells in Kaposi’s sarcoma initiation	NIHMS2045162-supplement-Supplementary_Table_2.xls	GO_MSC-MEMvsMSC-KSHVMEM_Long-Unnamed_18		361	36	1.70446	0.00120925	0.0152567	87831a74-1c81-512a-816b-e3a932ac8a06
PMC12068558	Unveiling the role of KSHV-infected human mesenchymal stem cells in Kaposi’s sarcoma initiation	NIHMS2045162-supplement-Supplementary_Table_2.xls	GO_MSC-MEMvsMSC-KSHVMEM_Long-Unnamed_19		376	37	1.68192	0.0013214	0.0163946	a6524c7e-e9cf-5fa6-b37e-4d88176fdc40
PMC12068558	Unveiling the role of KSHV-infected human mesenchymal stem cells in Kaposi’s sarcoma initiation	NIHMS2045162-supplement-Supplementary_Table_2.xls	GO_MSC-KSvsMSC-KSHVKS_Long-Unnamed_35		235	26	1.89103	0.00132172	0.0163965	cb5cf7e7-3d5c-526c-982a-41fb3cbab04b
PMC12068558	Unveiling the role of KSHV-infected human mesenchymal stem cells in Kaposi’s sarcoma initiation	NIHMS2045162-supplement-Supplementary_Table_2.xls	GO_MSC-MEMvsMSC-KSHVMEM_Long-Unnamed_30		341	34	1.70419	0.0016384	0.0195673	2df9f329-d91f-597b-b51a-330be8b5cf12
PMC12068558	Unveiling the role of KSHV-infected human mesenchymal stem cells in Kaposi’s sarcoma initiation	NIHMS2045162-supplement-Supplementary_Table_2.xls	GO_MSC-MEMvsMSC-KSHVMEM_Long-Unnamed_50		265	28	1.80595	0.00176516	0.0207615	5e798896-5a7b-5227-9b1b-3ff874839253
PMC12068558	Unveiling the role of KSHV-infected human mesenchymal stem cells in Kaposi’s sarcoma initiation	NIHMS2045162-supplement-Supplementary_Table_2.xls	GO_MSC-KSvsMSC-KSHVKS_Long-Unnamed_31		241	26	1.84395	0.00189331	0.0218812	eed19789-cc6a-5204-8ac2-a06776b810c9
PMC12068558	Unveiling the role of KSHV-infected human mesenchymal stem cells in Kaposi’s sarcoma initiation	NIHMS2045162-supplement-Supplementary_Table_2.xls	GO_MSC-MEMvsMSC-KSHVMEM_Short-Unnamed_22		89	13	2.49658	0.00193609	0.0222237	515998cc-574e-5e91-9b3a-9d53bc8ef275
PMC12068558	Unveiling the role of KSHV-infected human mesenchymal stem cells in Kaposi’s sarcoma initiation	NIHMS2045162-supplement-Supplementary_Table_2.xls	GO_MSC-KSvsMSC-KSHVKS_Long-Unnamed_30		244	26	1.82128	0.00225095	0.0251415	45a4552b-ea0c-5a41-909c-0b0932552fca
PMC12068558	Unveiling the role of KSHV-infected human mesenchymal stem cells in Kaposi’s sarcoma initiation	NIHMS2045162-supplement-Supplementary_Table_2.xls	GO_MSC-MEMvsMSC-KSHVMEM_Long-Unnamed_31		350	34	1.66036	0.00251311	0.0275453	fb73b020-366f-50fb-9863-cd4360bf14fc
PMC12068558	Unveiling the role of KSHV-infected human mesenchymal stem cells in Kaposi’s sarcoma initiation	NIHMS2045162-supplement-Supplementary_Table_4.xls	GO_MEMKSHV_KSKSHV_short_term-Unnamed_14		81	12	2.53215	0.00252288	0.0276264	ad6307ac-c706-555f-abc4-b2e9079a1aba
PMC12068558	Unveiling the role of KSHV-infected human mesenchymal stem cells in Kaposi’s sarcoma initiation	NIHMS2045162-supplement-Supplementary_Table_2.xls	GO_MSC-MEMvsMSC-KSHVMEM_Long-Unnamed_35		338	33	1.66874	0.00266629	0.0287914	7d052ed9-518f-5b83-bd70-6427c5664d76
PMC12068558	Unveiling the role of KSHV-infected human mesenchymal stem cells in Kaposi’s sarcoma initiation	NIHMS2045162-supplement-Supplementary_Table_2.xls	GO_MSC-KSvsMSC-KSHVKS_Long-Unnamed_63		149	18	2.0648	0.00271091	0.029155	b4bd7e67-754d-54bc-ab3b-9bb6cb2e2401
PMC12068558	Unveiling the role of KSHV-infected human mesenchymal stem cells in Kaposi’s sarcoma initiation	NIHMS2045162-supplement-Supplementary_Table_2.xls	GO_MSC-MEMvsMSC-KSHVMEM_Long-Unnamed_52		273	28	1.75302	0.00272113	0.0292488	a9de5c88-3998-5e64-814d-621f668638db
PMC12068558	Unveiling the role of KSHV-infected human mesenchymal stem cells in Kaposi’s sarcoma initiation	NIHMS2045162-supplement-Supplementary_Table_2.xls	GO_MSC-MEMvsMSC-KSHVMEM_Long-Unnamed_33		353	34	1.64625	0.00288251	0.0306398	fb83298c-2444-52e2-aca8-9d1a61a015bc
PMC12068558	Unveiling the role of KSHV-infected human mesenchymal stem cells in Kaposi’s sarcoma initiation	NIHMS2045162-supplement-Supplementary_Table_4.xls	GO_MEMKSHV_KSKSHV_long_term-Unnamed_14		83	12	2.47113	0.00310506	0.0323879	916422a2-d439-5370-ba14-def0d178bacf
PMC12068558	Unveiling the role of KSHV-infected human mesenchymal stem cells in Kaposi’s sarcoma initiation	NIHMS2045162-supplement-Supplementary_Table_2.xls	GO_MSC-KSvsMSC-KSHVKS_Long-Unnamed_25		250	26	1.77757	0.00314136	0.0327256	ec7ad059-9cd3-5d4d-881d-251adccc44e8
PMC12068558	Unveiling the role of KSHV-infected human mesenchymal stem cells in Kaposi’s sarcoma initiation	NIHMS2045162-supplement-Supplementary_Table_2.xls	GO_MSC-KSvsMSC-KSHVKS_Long-Unnamed_27		250	26	1.77757	0.00314136	0.0327256	fb6519ca-9e8a-5baa-b476-f3b93e174b4c
PMC12068558	Unveiling the role of KSHV-infected human mesenchymal stem cells in Kaposi’s sarcoma initiation	NIHMS2045162-supplement-Supplementary_Table_2.xls	GO_MSC-MEMvsMSC-KSHVMEM_Long-Unnamed_26		346	33	1.63016	0.00383768	0.0383197	eedc7505-4dfe-5d23-8937-6474d361ba89
PMC12068558	Unveiling the role of KSHV-infected human mesenchymal stem cells in Kaposi’s sarcoma initiation	NIHMS2045162-supplement-Supplementary_Table_2.xls	GO_MSC-KSvsMSC-KSHVKS_Long-Unnamed_44		203	22	1.85233	0.00385949	0.0384909	cb69b460-cf2a-552e-86dc-3a0583e877ac
PMC12068558	Unveiling the role of KSHV-infected human mesenchymal stem cells in Kaposi’s sarcoma initiation	NIHMS2045162-supplement-Supplementary_Table_2.xls	GO_MSC-MEMvsMSC-KSHVMEM_Long-core_enrichment		119	15	2.15445	0.00395885	0.0391193	3ccea65e-03f4-5381-b807-2adad5f8f47e
PMC12068558	Unveiling the role of KSHV-infected human mesenchymal stem cells in Kaposi’s sarcoma initiation	NIHMS2045162-supplement-Supplementary_Table_2.xls	GO_MSC-MEMvsMSC-KSHVMEM_Long-Unnamed_29		349	33	1.61615	0.00437759	0.0423457	44fcb313-6778-592b-8841-24c92f0c67d4
PMC12068558	Unveiling the role of KSHV-infected human mesenchymal stem cells in Kaposi’s sarcoma initiation	NIHMS2045162-supplement-Supplementary_Table_2.xls	GO_MSC-KSvsMSC-KSHVKS_Long-Unnamed_22		259	26	1.7158	0.00502479	0.0472164	18694847-81cb-5918-8b4e-baafe2b87fb8
PMC12068558	Unveiling the role of KSHV-infected human mesenchymal stem cells in Kaposi’s sarcoma initiation	NIHMS2045162-supplement-Supplementary_Table_2.xls	GO_MSC-KSvsMSC-KSHVKS_Long-Unnamed_56		171	19	1.89911	0.00532857	0.0495475	ba54da27-c9ad-5c6e-b9ab-1ac72f92365e
PMC12070678	Profiling triple-negative breast cancer-specific super-enhancers identifies high-risk mesenchymal development subtype and BETi-Targetable vulnerabilities	12943_2025_2342_MOESM2_ESM.xlsx	Supplementary_Table_6-Unnamed_20		500	52	1.77757	3.66011e-05	0.000787817	a04c39bc-1bcd-5f77-bd65-7a0ca2b6c9cc
PMC12070678	Profiling triple-negative breast cancer-specific super-enhancers identifies high-risk mesenchymal development subtype and BETi-Targetable vulnerabilities	12943_2025_2342_MOESM2_ESM.xlsx	Supplementary_Table_10-Unnamed_14		66	11	2.84866	0.00143669	0.0175179	c58c422e-cdcc-566b-9946-345a8492f608
PMC12070678	Profiling triple-negative breast cancer-specific super-enhancers identifies high-risk mesenchymal development subtype and BETi-Targetable vulnerabilities	12943_2025_2342_MOESM2_ESM.xlsx	Supplementary_Table_2-Unnamed_5		11	4	6.21527	0.00275611	0.0294836	3efe076d-8006-577e-9a35-6fc2c58533e7
PMC12070678	Profiling triple-negative breast cancer-specific super-enhancers identifies high-risk mesenchymal development subtype and BETi-Targetable vulnerabilities	12943_2025_2342_MOESM2_ESM.xlsx	Supplementary_Table_9-gene		1286	96	1.2839	0.00516049	0.0482247	464a19ba-fcde-57d7-a6c0-2cdf35afe7ec
PMC12079351	PLXDC1 + Tumor‐Associated Pancreatic Stellate Cells Promote Desmoplastic and Immunosuppressive Niche in Pancreatic Ductal Adenocarcinoma	ADVS-12-2415756-s006.xlsx	Supplementary_Table_6-Unnamed_10		200	27	2.30742	4.14181e-05	0.000877629	306584cc-9f04-555c-9c59-87523724e2a6
PMC12079351	PLXDC1 + Tumor‐Associated Pancreatic Stellate Cells Promote Desmoplastic and Immunosuppressive Niche in Pancreatic Ductal Adenocarcinoma	ADVS-12-2415756-s006.xlsx	Supplementary_Table_6-Unnamed_3		99	14	2.41705	0.00180997	0.021185	7b6d5fa4-8b66-51c4-9c76-f5fad5d456ef
PMC12116329	Induction of HMOX1 by mesenchymal stem cell cytotherapy inhibits osteoclastogenesis and myeloma‐induced bone disease	CTM2-15-e70302-s002.xlsx	Suppl_Table_1-Supplemental_Table_1_Top_upregulated_and_downregulated_genes_following_MSC_cytotherapy		131	17	2.21804	0.00163248	0.019526	07ac06ef-8b98-585c-9698-8e8e07c6924e
PMC12126244	SOX9 suppresses colon cancer via inhibiting epithelial-mesenchymal transition and SOX2 induction	jci-135-184115-s239.xlsx	Fig_4C-Unnamed_1		1834	173	1.61228	2.86268e-11	2.41193e-09	bb87f8ab-cf40-5a60-be71-63079d5f8a75
PMC12126244	SOX9 suppresses colon cancer via inhibiting epithelial-mesenchymal transition and SOX2 induction	jci-135-184115-s239.xlsx	Fig_4C-Unnamed_6		1138	99	1.48691	3.03361e-05	0.000668741	de942ee0-9b39-5ec3-80c1-a8fdcf2d29a6
PMC12130531	Cancer-associated fibroblast-derived fibulin-5 promotes epithelial–mesenchymal transition in diffuse-type gastric cancer via cAMP response element-binding protein pathway, showing poor prognosis	12276_2025_1447_MOESM2_ESM.xlsx	link-ENTITYA		2084	202	1.66149	1.65244e-14	2.44623e-12	a5fa44b2-491f-5556-91ba-554f5ba084cc
PMC12130531	Cancer-associated fibroblast-derived fibulin-5 promotes epithelial–mesenchymal transition in diffuse-type gastric cancer via cAMP response element-binding protein pathway, showing poor prognosis	12276_2025_1447_MOESM2_ESM.xlsx	link-ENTITYB		2214	195	1.50743	3.69709e-10	2.52808e-08	7b75e885-8ab3-51bd-afaa-31caad8f49e2
PMC12167206	FKBP5 promotes osteogenic differentiation of mesenchymal stem cells through type-I interferon pathway Inhibition	18_2025_5754_MOESM3_ESM.docx	0-Gene_symbol		17	7	7.03788	2.65507e-05	0.000595745	003e8880-4bcb-56d1-bb28-c25485121f4e
PMC12202500	MCSP+ metastasis founder cells activate immunosuppression early in human melanoma metastatic colonization	43018_2025_963_MOESM14_ESM.xlsx	ED_Fig_3i_ref_markergenesetl-Wouters_Mesenchymal_like_cell_state		1665	144	1.48	4.22568e-07	1.50126e-05	34592cc6-7b13-576a-a467-1295ee0ea253
PMC12202500	MCSP+ metastasis founder cells activate immunosuppression early in human melanoma metastatic colonization	43018_2025_963_MOESM14_ESM.xlsx	ED_Fig_3i_ref_markergenesetl-Pozniak_Mesenchymal_like		160	21	2.24332	0.000421863	0.00638953	5c4891a8-4ce1-5f2e-96b5-b558557e6fd7
PMC12220362	Identification of biomarkers associated with proliferation and differentiation of mesenchymal stem cells in pulmonary adenocarcinoma and establishment of prognostic models	41065_2025_492_MOESM1_ESM.csv	probes		610	93	2.60583	6.88948e-18	1.70504e-15	e4104840-b93a-5f03-a87d-5fef16b0704d
PMC12220362	Identification of biomarkers associated with proliferation and differentiation of mesenchymal stem cells in pulmonary adenocarcinoma and establishment of prognostic models	41065_2025_492_MOESM2_ESM.csv	Unnamed_0		1058	82	1.32471	0.00446272	0.0430517	4b989dbc-08f7-54e0-830c-7794476bd4c8
PMC12238021	Pterostilbene mitigates experimental pulmonary arterial hypertension by inhibiting endothelial-to-mesenchymal transition	Table2.xlsx	Downregulated-Unnamed_2		52	11	3.61561	0.000170711	0.0029678	de6a2e1c-8199-52dd-b6b7-dc718e33ae03
PMC12247201	Specificity protein 1 initiates epithelial-mesenchymal transition of circulating tumor cells to inhibit metastasis in prostate cancer	12935_2025_3888_MOESM1_ESM.xlsx	Sheet1-Supplemental_Table_1		107	14	2.23633	0.00376334	0.0377614	c7ed4ac4-6c3a-5ec4-be48-18cfe74d3309
PMC1327674	Stromal mesenchyme cell genes of the human prostate and bladder	1471-2490-5-17.nxml	Bladder_Stromal_Genes	be distinguished (e.g., reactivity to CD56) but a number of CD molecules, among them CD1**3** Organ-specific stromal mesenchyme cell genes. Listed are the candidates identified through array analysis. Fold difference in the last column of each grouping provides a rough estimate of the level of differential expression between the two cell typesGeneBFASSMTHFD2CLDN11IL1BCA12PIROSF-2ASNSIMPA2ALDH1A1P…	20	7	5.98219	9.06229e-05	0.00172895	f2bc7a4d-79f5-570b-b10c-bd0932898c70
PMC1327674	Stromal mesenchyme cell genes of the human prostate and bladder	1471-2490-5-17.nxml	Gene	be distinguished (e.g., reactivity to CD56) but a number of CD molecules, among them CD1**3** Organ-specific stromal mesenchyme cell genes. Listed are the candidates identified through array analysis. Fold difference in the last column of each grouping provides a rough estimate of the level of differential expression between the two cell typesGeneBFASSMTHFD2CLDN11IL1BCA12PIROSF-2ASNSIMPA2ALDH1A1P…	16	6	6.40949	0.000190079	0.00324472	b2f7466b-21e3-5cf3-aa7c-fb4d476c5e3e
PMC1410754	HER-2 overexpression differentially alters transforming growth factor-β responses in luminal versus mesenchymal human breast cancer cells	bcr1343-S8.xls	22509-Table_TS8	both MDA-MB-231 CN and MDA-MB-231 H2 cells (Fig. 5c). Thus HER-2 overexpression, oncogenic ras [4**8**] Additional File 8A table (Excel file) listing the effects of 6 h TGF-β exposure on MDA-MB-231 H2 cells. It includes 306 elements (1.4% of total) up- or down-regulated greater than 1.5-fold with a p-value < 0.01 Click here for file	397	42	1.81279	0.000132425	0.00238944	6f15f738-aa56-534f-918c-db3dd8dcc0bb
PMC1410754	HER-2 overexpression differentially alters transforming growth factor-β responses in luminal versus mesenchymal human breast cancer cells	bcr1343-S9.xls	TGFß_modul_sorted-Primary_Sequence_Name	to exogenous, recombinant TGF-β1 for 6 or 24 h (Additional files 6, 7, 8, **9**) Additional File 9A table (Excel file) listing the effects of 24 h TGF-β exposure on MDA-MB-231 H2 cells. It includes 605 elements (2.7% of total) up- or down-regulated greater than 1.5-fold with a p-value < 0.01 Click here for file	135	18	2.27893	0.000879463	0.0117261	ccbda2f5-571a-5fd0-b101-3158aa2b0c98
PMC2174485	Genes involved in TGFβ1-driven epithelial-mesenchymal transition of renal epithelial cells are topologically related in the human interactome map	1471-2164-8-383-S1.xls	Foglio1-D	were obtained independently for each comparison and results are given in the Additional file **1** Additional file 1List of differentially expressed genes. Genes numbered from 1 to 554 (column A) passed both statistical analyses (SAM and "intensity-dependent calculation of standard Z-score", see Methods), those numbered from 555 to 993 passed only the SAM analysis. The other columns show: (B) the…	887	77	1.48375	0.000264648	0.00430818	4668cf5f-3296-5ca9-aec9-e0ff3fcf5139
PMC2358905	Gene expression pattern of functional neuronal cells derived from human bone marrow mesenchymal stromal cells	1471-2164-9-166-S1.doc	1-Gene_symbol	function and the pathway which in they were implicated (Table 2) [see additional file **1**] Additional file 1Tables. Primer sequences used for qRT-PCR and gene list detected by microarray Click here for file	100	16	2.73472	0.000214983	0.00360829	21404cba-e6d6-5d30-9e7c-13ec3c3fd1b8
PMC2729372	Genome-Wide Analysis of Histone H3 Lysine9 Modifications in Human Mesenchymal Stem Cell Osteogenic Differentiation	pone.0006792.s005.xls	down-regulate-HUGOname	more than 2 folds down-regulation upon the differentiation process, as shown by the microarrays (**Table S3**) differentially expressed genes(0.46 MB XLS) Click here for additional data file	587	50	1.46085	0.00428381	0.0416542	1e5a17db-6852-570f-bf23-09e3d9164512
PMC2775947	Epigenetic Features of Human Mesenchymal Stem Cells Determine Their Permissiveness for Induction of Relevant Transcriptional Changes by SYT-SSX1	pone.0007904.s005.xls	B-Unnamed_2	with a false discovery rate (FDR) of 1% and a mean fold change >2 (**table S2**) List of probesets differentially expressed in human MSCs expressing SYT-SSX1 or an empty vector, 12 days after the infection and puromycin selection. A) Lists of the probesets that are differentially expressed with an FDR of 1% and a mean fold change >2. The four human MSCs batches were analyzed together with rank pr…	1860	177	1.62737	7.14453e-12	6.74057e-10	3cabe18e-6f64-5a1a-9b1b-2d1222736dc4
PMC2775947	Epigenetic Features of Human Mesenchymal Stem Cells Determine Their Permissiveness for Induction of Relevant Transcriptional Changes by SYT-SSX1	pone.0007904.s008.xls	S5-Unnamed_1	to all populations whereas that of most of the others was batch-specific (table S4, **table S5**) Overlap of the lists of differentially expressed genes in the single-batch lists (MSCs b1–b4) and the lists derived from the rank-product analysis (MSCs rankproduct) with the genes whose TSS lies within a CpG island.(0.76 MB XLS) Click here for additional data file	1380	117	1.4491	1.67324e-05	0.000397912	5ad50057-550d-522b-bfa5-7688a29577fb
PMC2775947	Epigenetic Features of Human Mesenchymal Stem Cells Determine Their Permissiveness for Induction of Relevant Transcriptional Changes by SYT-SSX1	pone.0007904.s011.xls	Feuil1-Unnamed_3	derived from single batch analysis were used and the results are summarized in tables (**table S8**) Overlap of the lists of differentially expressed genes in the single-batch lists (MSCs b1–b4) and the lists derived from the rank-product analysis (MSCs rankproduct) with the sarcoma signatures identified in Francis et al, 2007, BMC Genomics 8: 73.(0.88 MB XLS) Click here for additional data file	714	69	1.65175	2.29277e-05	0.000524207	8a907734-7599-544a-9b0e-4720bde3010b
PMC2775947	Epigenetic Features of Human Mesenchymal Stem Cells Determine Their Permissiveness for Induction of Relevant Transcriptional Changes by SYT-SSX1	pone.0007904.s005.xls	A-Unnamed_2	with a false discovery rate (FDR) of 1% and a mean fold change >2 (**table S2**) List of probesets differentially expressed in human MSCs expressing SYT-SSX1 or an empty vector, 12 days after the infection and puromycin selection. A) Lists of the probesets that are differentially expressed with an FDR of 1% and a mean fold change >2. The four human MSCs batches were analyzed together with rank pr…	118	16	2.31756	0.00139144	0.0171028	fbab9c86-eaf3-5faf-8f9f-0d749622d5fd
PMC2803263	Gene Expression Profile of Mesenchymal Stem Cells from Paired Umbilical Cord Units: Cord is Different from Blood	12015_2009_9098_MOESM1_ESM.doc	0-Gene	a 0.05 level of significance. Primer sequences are provided in Supplemental Table 1 (Table **S1**) Primer pairs designed for RT-Q-PCR analysis. (DOC 32 kb)	6	3	8.54599	0.00349227	0.0355141	599befd3-56fb-5059-9577-9433da88d56e
PMC3012672	Global profiling of histone and DNA methylation reveals epigenetic-based regulation of gene expression during epithelial to mesenchymal transition in prostate cells	1471-2164-11-669-S4.XLS	Gene_list-Unnamed_15	considered as differentially epigenetic modified genes. As shown in Figure 6A and Additional file **4** Additional file 4Epigenetic changed genes during EMT and gene ontology analysis. The file contains the list of genes with epigenetic changes including both increased and decreased H3K4me3, H3K27me3 and DNAMe from EP156T to EPT1 cells Click here for file	699	69	1.68719	1.14729e-05	0.000285276	7aad83ab-71bc-5f68-a732-85b9f2918d1f
PMC3012672	Global profiling of histone and DNA methylation reveals epigenetic-based regulation of gene expression during epithelial to mesenchymal transition in prostate cells	1471-2164-11-669-S4.XLS	Gene_list-Unnamed_9	considered as differentially epigenetic modified genes. As shown in Figure 6A and Additional file **4** Additional file 4Epigenetic changed genes during EMT and gene ontology analysis. The file contains the list of genes with epigenetic changes including both increased and decreased H3K4me3, H3K27me3 and DNAMe from EP156T to EPT1 cells Click here for file	1109	87	1.34085	0.00244325	0.0268622	e90d2e3a-edfb-50af-bdec-7350fbb79d9e
PMC3012672	Global profiling of histone and DNA methylation reveals epigenetic-based regulation of gene expression during epithelial to mesenchymal transition in prostate cells	1471-2164-11-669-S5.XLS	Gene_list-List_of_172_up-regulated_and_307_down-regulated_genes_during_EMT_from_EP156T_to_EPT1_cells	expressed genes. There were 172 up-regulated and 307 down-regulated genes during EMT (Additional file **5**) Additional file 5Expression changed genes during EMT and geneontology analysis. This file contains the list of genes that have changed expression from EP156T to EPT1 cells and the GO analysis of these genes Click here for file	171	19	1.89911	0.00532857	0.0495475	c16fcbbf-f0cc-515d-8fa6-7f91f8bd20e0
PMC3025437	Von willebrand factor increases endothelial cell adhesiveness for human mesenchymal stem cells by activating p38 mitogen-activated protein kinase	scrt35-S2.XLS	Sheet1-Gene_Symbol	HUVECs we used Affymetrix DNA microarrays. The set of Affymetrix Human Genome U133 Plus **2** Additional file 2Excel file. List of Affymetrix probe sets with expression values changed more than two-fold (t-test, P-value < = 0.05) for HUVECs treated with vWF (4 μg/ml vWF, four hours) vs. HUVECs maintained in EGM2 growth media Click here for file	323	37	1.95791	6.87639e-05	0.00136231	f36313bf-8cae-56ea-973f-5d7d629b13be
PMC3040305	A systems view of epithelial–mesenchymal transition signaling states	10585_2010_9367_MOESM1_ESM.xls	Suppl_Table_8_-_EMT_modulated-Gene_Symbol	Supplementary material 1 (XLS 1025 kb)	1159	118	1.74619	8.15147e-10	5.21483e-08	4016af48-3e0e-5f47-aa11-f68881d61fa9
PMC3040305	A systems view of epithelial–mesenchymal transition signaling states	10585_2010_9367_MOESM1_ESM.xls	Suppl_Table_S5_-_Cell_Survival-Gene_Symbol	Supplementary material 1 (XLS 1025 kb)	423	44	1.77789	0.000143619	0.00256162	dce6b191-b87f-5457-aab7-3216930c95cc
PMC3040305	A systems view of epithelial–mesenchymal transition signaling states	10585_2010_9367_MOESM1_ESM.xls	Suppl_Table_S4_-_Cell_contacts-Gene_Symbol	Supplementary material 1 (XLS 1025 kb)	254	30	2.01874	0.000191264	0.00325857	38894cc7-1321-5ab1-8608-b0fb572dc37b
PMC3040305	A systems view of epithelial–mesenchymal transition signaling states	10585_2010_9367_MOESM1_ESM.xls	Suppl_Table_S3_-_TranscriptVenn-STZ_Down	Supplementary material 1 (XLS 1025 kb)	252	29	1.97477	0.000352571	0.0054997	8ab7ab8f-7460-56c8-9963-eb556dad9e61
PMC3040305	A systems view of epithelial–mesenchymal transition signaling states	10585_2010_9367_MOESM1_ESM.xls	Suppl_Table_S3_-_TranscriptVenn-HC_Down	Supplementary material 1 (XLS 1025 kb)	136	18	2.33072	0.000672639	0.0094181	7e13c7e9-cb11-5842-bad7-7d9fe72318ce
PMC3040305	A systems view of epithelial–mesenchymal transition signaling states	10585_2010_9367_MOESM1_ESM.xls	Suppl_Table_12_-_Model_Diff-Gene_Symbol	Supplementary material 1 (XLS 1025 kb)	752	64	1.45464	0.0014397	0.0175512	bfc07428-71dc-5c70-90a6-3944c9e1443d
PMC3040305	A systems view of epithelial–mesenchymal transition signaling states	10585_2010_9367_MOESM1_ESM.xls	Suppl_Table_S3_-_TranscriptVenn-STZ_Up	Supplementary material 1 (XLS 1025 kb)	185	21	1.94017	0.00271645	0.0292048	475410ad-9bae-5d6c-92b5-c98fbf330f73
PMC3040305	A systems view of epithelial–mesenchymal transition signaling states	10585_2010_9367_MOESM1_ESM.xls	Suppl_Table_S3_-_TranscriptVenn-SZ_Down	Supplementary material 1 (XLS 1025 kb)	187	21	1.91942	0.0030903	0.0323321	16e3d140-c191-5f34-b239-a00bbf0884d6
PMC3100315	Glioblastoma Models Reveal the Connection between Adult Glial Progenitors and the Proneural Phenotype	pone.0020041.s006.xls	1_classifier_gene_mouse-Gene_Symbol	Mesenchymal [10], 723 orthologs could be mapped to the mouse arrays (see Methods and **Table S1**) (XLS) Click here for additional data file	820	71	1.47992	0.000496476	0.00731899	16b4155c-d799-5f69-8cb3-93d11d58a6e7
PMC3102717	The Cell Surface Proteome of Human Mesenchymal Stromal Cells	pone.0020399.s003.xls	Sheet1-Unnamed_2	97 and 168 proteins are unique for hMSCs and hESCs, respectively (Figure 3A and **Table S3**) List of hESC and hMSC cell surface proteins compared in this study.(XLS) Click here for additional data file	164	19	1.98017	0.00337179	0.0346498	036ead2d-364e-572c-8654-f2fe8b39f412
PMC3110206	A Novel Network Profiling Analysis Reveals System Changes in Epithelial-Mesenchymal Transition	pone.0020804.s014.xls	tab_S9-Regulator	(12.42 and 16.57, respectively) which was ranked 15-th and 10-th among the 1732 regulators (**Table S9**) List of the changes in the regulatory effects from 1732 regulators to E-cadherin and vimentin during the EMT. (XLS) Click here for additional data file	1188	118	1.69769	4.29325e-09	2.3851e-07	8f16a92e-4c6c-5bbb-9de3-45d72c40df91
PMC3110206	A Novel Network Profiling Analysis Reveals System Changes in Epithelial-Mesenchymal Transition	pone.0020804.s012.xls	20110124_fdr-Unnamed_0	their integral -value were calculated. The result was summarized by a regulator function matrix (**Table S7**) Regulator function matrix between 1732 regulators and 5 functions. The row and column indicate regulator and functional gene set, respectively. The ()-th element represents the change during the EMT in the statistical significance (-(-value)) for the enrichment of target genes of the -th…	1188	118	1.69769	4.29325e-09	2.3851e-07	8f16a92e-4c6c-5bbb-9de3-45d72c40df91
PMC3110206	A Novel Network Profiling Analysis Reveals System Changes in Epithelial-Mesenchymal Transition	pone.0020804.s006.xls	Supplementary_table_1-Gene_Symbol	in the HG-U133A microarray gene set to 1183 transcription factors and 47 nuclear receptors (**Table S1**) List of candidate regulators mapped to 1183 transcription factors and 47 nuclear receptors. (XLS) Click here for additional data file	1219	119	1.66854	9.92351e-09	5.128e-07	643fced8-e1e4-57ec-b2b1-e05d971accd8
PMC3110206	A Novel Network Profiling Analysis Reveals System Changes in Epithelial-Mesenchymal Transition	pone.0020804.s010.xls	Supplementary_table_5-Gene_Symbol	may control the expression of E-cadherin in any of the 762 cancer cell lines (**Table S5**) List of 370 putative master regulators of E-cadherin during the EMT which were estimated by NetworkProfiler. (XLS) Click here for additional data file	318	36	1.93494	0.000109182	0.00202858	53f4a354-e014-5199-9524-4f33dfe3f50a
PMC3110206	A Novel Network Profiling Analysis Reveals System Changes in Epithelial-Mesenchymal Transition	pone.0020804.s011.xls	Supplementary_table_6-Gene_Symbol	of non-zero regression coefficients in 1000 bootstrapped datasets. The SEM inferred 627 putative regulators (**Table S6**) List of 627 putative master regulators of E-cadherin which were estimated by a structual equation model (SEM) with the elastic net. (XLS) Click here for additional data file	460	47	1.74635	0.000131564	0.00237839	0470d516-bdd9-5f6f-8764-46188ac2146b
PMC3166977	In vitro generation of human cells with cancer stem cell properties	NIHMS307675-supplement-11.xlsx	Sheet1-Unnamed_2	from primary tumours were non-fibroblastic and expressed reduced levels of mesenchymal markers (Fig. 5d, **Supplementary Table S2**)	211	30	2.43014	5.59233e-06	0.000150918	0c6f434a-861c-5789-8d48-cd30b0b3bdbe
PMC3236343	Transcriptome analysis of embryonic mammary cells reveals insights into mammary lineage establishment	bcr2928-S6.XLS	MM_core_network-Unnamed_2	Population-enriched expression was observed for **6** Additional file 6Mammary mesenchymal primordial core network members. Table contains mammary mesenchymal core network members Click here for file	124	21	2.89461	9.65882e-06	0.000245168	949dbaf2-51a0-55eb-bbc1-5522ed7b238f
PMC3236343	Transcriptome analysis of embryonic mammary cells reveals insights into mammary lineage establishment	bcr2928-S6.XLS	MM_core_network-Mammary_mesenchyme_core_network_members	Population-enriched expression was observed for **6** Additional file 6Mammary mesenchymal primordial core network members. Table contains mammary mesenchymal core network members Click here for file	125	20	2.73472	3.66955e-05	0.000789603	7aad0a45-dcc3-5199-9b98-11987c14bd01
PMC3266274	Progesterone Inhibits Epithelial-to-Mesenchymal Transition in Endometrial Cancer	pone.0030840.s004.xls	Sheet1-Unnamed_1	were significantly regulated by progesterone in the IKPRAB-36 cell line (1029 up-regulated, 587 down-regulated, **Table S4**) List of significantly MPA regulated genes in the IKPRAB-36 endometrial cancer cell line. List of significantly MPA regulated genes in the Ishikawa IKPRAB-36 cell line (n = 3). Negative values indicate down regulation by MPA, positive values indicate up regulation by MPA. A…	1039	118	1.94489	8.33529e-13	9.27076e-11	55bded94-9e1c-5897-baf7-71878bc9a41b
PMC3406343	Altered Death Receptor Signaling Promotes Epithelial-to-Mesenchymal Transition and Acquired Chemoresistance	srep00539-s1.pdf	6-LNX2	Supplementary InformationSupplemental Info	43	9	3.57739	0.000717139	0.00991541	21b909cf-827b-5ef4-a7bd-df471c80f08a
PMC3406343	Altered Death Receptor Signaling Promotes Epithelial-to-Mesenchymal Transition and Acquired Chemoresistance	srep00539-s1.pdf	10-LNX2	Supplementary InformationSupplemental Info	43	9	3.57739	0.000717139	0.00991541	21b909cf-827b-5ef4-a7bd-df471c80f08a
PMC3423388	Overexpression of CD157 Contributes to Epithelial Ovarian Cancer Progression by Promoting Mesenchymal Differentiation	pone.0043649.s006.docx	0-Unnamed_1	to our selection criteria, 378 unique significantly modulated transcripts (163 upregulated and 215 downregulated) (**Table S3**) Genes up-regulated in OVCAR-3 and OV-90 cells overexpressing CD157 vs the corresponding mock cells. (DOCX) Click here for additional data file	153	21	2.34596	0.000227455	0.00378646	8239cc37-44b3-5b78-a461-90ecc4d6c225
PMC3433142	Gene Expression Profile Reveals Abnormalities of Multiple Signaling Pathways in Mesenchymal Stem Cell Derived from Patients with Systemic Lupus Erythematosus	CDI2012-826182.nxml	Upregulated_genes_in_actin_cytoskeleton_pathway	differentially expressed genes in regulation of actin cytoskeleton and TGF-β signaling were listed in **Table 2** Differentially expressed genes in regulation of actin cytoskeleton and TGF-β signaling between SLE patients and normal controlsACTN4ACTBVAV1MATKITGB5ITGB4Downregulated genes in actin cytoskeleton pathwayKRASARPC3ARPC4ARPC5NRASGNG12NCKAP1ITGA1CRKLPPP1CCCFL2ROCK2PDGFRAF2RRDXPPP1R12AARHG…	43	9	3.57739	0.000717139	0.00991541	e1d322da-a3ec-553c-a52b-1d537dadc6dd
PMC3519484	Meta-Analysis of Gene Expression Signatures Defining the Epithelial to Mesenchymal Transition during Cancer Progression	pone.0051136.s005.doc	0-Gene_Symbol	cluster analysis of the genes shared between at least 10 datasets contained 365 genes (**Table S2**) List of 365 genes significantly regulated in at least 10 GES datasets.(DOC) Click here for additional data file	365	37	1.73261	0.000771058	0.010512	44370d47-e6cd-59b9-8df8-745dd2cd332c
PMC3546995	Human Embryonic Stem Cell Derived Mesenchymal Progenitors Express Cardiac Markers but Do Not Form Contractile Cardiomyocytes	pone.0054524.s008.xls	AZA_vs_ESMP-Genes_overexpressed_in_hESC-MPs_compared_to_5-AZA_treated_hESC-MPs	differentiated cells (Figure S5B). A list of these differentially expressed genes is given in **table S2** (XLS) Click here for additional data file	1261	147	1.99406	8.17079e-17	1.71972e-14	b4d67233-1cb5-55bd-9530-41057a4948b3
PMC3563956	Human Stromal (Mesenchymal) Stem Cells from Bone Marrow, Adipose Tissue and Skin Exhibit Differences in Molecular Phenotype and Differentiation Potential	12015_2012_9365_MOESM8_ESM.xls	all_but_hATSC-Common_elements_in_hMSC-TERT_hNSSC_and_hASSC	details of these groups of genes and associated pathways are presented in supplementary Table **2** Spreadsheet 1: List of genes specific for hMSC-TERT. Spreadsheet 2: List of genes specific for hNSSCs. Spreadsheet 3: List of genes specific for hASSCs. Spreadsheet 4: List of genes specific for hATSCs. Spreadsheet 5: List of genes in common between hMSC-TERT and hNSSCs. Spreadsheet 6: List of gene…	143	18	2.15144	0.00171377	0.0202935	7c80cc5d-2344-54f4-90ab-ebf02dc8aef2
PMC3563956	Human Stromal (Mesenchymal) Stem Cells from Bone Marrow, Adipose Tissue and Skin Exhibit Differences in Molecular Phenotype and Differentiation Potential	12015_2012_9365_MOESM8_ESM.xls	hMSC-TERT-Elements_only_in_hMSC-TERT	details of these groups of genes and associated pathways are presented in supplementary Table **2** Spreadsheet 1: List of genes specific for hMSC-TERT. Spreadsheet 2: List of genes specific for hNSSCs. Spreadsheet 3: List of genes specific for hASSCs. Spreadsheet 4: List of genes specific for hATSCs. Spreadsheet 5: List of genes in common between hMSC-TERT and hNSSCs. Spreadsheet 6: List of gene…	541	47	1.48489	0.00408912	0.0401103	d4eec4fd-e470-534a-98c5-67684d6a9788
PMC3579892	Molecular Subtypes in Head and Neck Cancer Exhibit Distinct Patterns of Chromosomal Gain and Loss of Canonical Cancer Genes	pone.0056823.s008.xlsx	Mesenchymal_High_vs_Others-Gene	the association of all genes in the dataset with tumor subtype are provided in **Table S1** Differentially Expressed Genes in the Expression Subtypes. The R package samr was used to identify genes that were differentially expressed when each subtype was compared to all other subtypes combined based on an FDR threshold of q = .01.(XLSX) Click here for additional data file	1893	182	1.64329	1.38359e-12	1.47749e-10	c861b915-8588-557d-9f34-fda4dd76f1e6
PMC3608605	FOXQ1, a Novel Target of the Wnt Pathway and a New Marker for Activation of Wnt Signaling in Solid Tumors	pone.0060051.s006.docx	0-Gene	TPX2, AURKA, yet a negative correlation was observed with EMT-markers (VIM, SNAI2, ZEB2, CDH2) (**Table S2**) Strong association of FOXQ1 expression with genes involved in Wnt signaling and proliferation. T-statistics based on Prototype-based Gene Coexpression analysis (expO data set (GSE2109)) with respect to the correlation of FOXQ1 with various known direct Wnt targets (AXIN2, APCDD1), markers…	11	4	6.21527	0.00275611	0.0294836	a618890a-a0cc-506c-9eaf-51b8a2ab1f1b
PMC3613826	PTTG2 silencing results in induction of epithelial-to-mesenchymal transition and apoptosis	cddis201348x7.pdf	3-Gene_Symbol	Click here for additional data file	57	11	3.29845	0.00039894	0.00608302	07985ee4-744e-5135-9322-92bcf2161d9d
PMC3613826	PTTG2 silencing results in induction of epithelial-to-mesenchymal transition and apoptosis	cddis201348x7.pdf	5-Gene_Symbol	Click here for additional data file	58	10	2.94689	0.00179449	0.0210346	d63adeb1-9d66-5e43-9a9c-d3a3046bd38c
PMC3620534	Genome-wide map of quantified epigenetic changes during in vitro chondrogenic differentiation of primary human mesenchymal stem cells	1471-2164-14-105-S2.xlsx	downregulated_txt-Unnamed_1	differentiated chondrocytes and another set typical of undifferentiated MSCs, we chose 10 canonical chondrogenic (COL**2**) Additional file 2Genes with down-regulated expression during chondrogenic differentiation. Shown is the microarray expression data for all four donors, with mean values for chondrogenic and mesenchymal cells and the enrichment ratio as log2 transformed values Click here for …	507	53	1.78674	2.67989e-05	0.000600215	b11eae91-5d83-5839-ac6c-ee16ce10af42
PMC3620534	Genome-wide map of quantified epigenetic changes during in vitro chondrogenic differentiation of primary human mesenchymal stem cells	1471-2164-14-105-S2.xlsx	downregulated_txt-Investigated_Gene	differentiated chondrocytes and another set typical of undifferentiated MSCs, we chose 10 canonical chondrogenic (COL**2**) Additional file 2Genes with down-regulated expression during chondrogenic differentiation. Shown is the microarray expression data for all four donors, with mean values for chondrogenic and mesenchymal cells and the enrichment ratio as log2 transformed values Click here for …	506	52	1.75649	5.01481e-05	0.00103635	752f4298-c5c7-590c-a044-e7f942bcc829
PMC3620534	Genome-wide map of quantified epigenetic changes during in vitro chondrogenic differentiation of primary human mesenchymal stem cells	1471-2164-14-105-S1.xlsx	upregulated_txt-Unnamed_1	genes typical of differentiated chondrocytes and another set typical of undifferentiated MSCs, we chose **1** Additional file 1Genes with up-regulated expression during chondrogenic differentiation. Shown is the microarray expression data for all four donors, with mean values for chondrogenic and mesenchymal cells and the enrichment ratio as log2 transformed values Click here for file	446	42	1.61318	0.00145699	0.0177335	00878537-04b4-5d40-9b88-492595c6379e
PMC3620534	Genome-wide map of quantified epigenetic changes during in vitro chondrogenic differentiation of primary human mesenchymal stem cells	1471-2164-14-105-S1.xlsx	upregulated_txt-Investigated_Gene	genes typical of differentiated chondrocytes and another set typical of undifferentiated MSCs, we chose **1** Additional file 1Genes with up-regulated expression during chondrogenic differentiation. Shown is the microarray expression data for all four donors, with mean values for chondrogenic and mesenchymal cells and the enrichment ratio as log2 transformed values Click here for file	450	42	1.59525	0.00179984	0.0210922	a840b5c7-9388-50ac-b515-c1d71374b6aa
PMC3620534	Genome-wide map of quantified epigenetic changes during in vitro chondrogenic differentiation of primary human mesenchymal stem cells	1471-2164-14-105-S8.xlsx	Sheet1-Associated_gene	and enhancer regions. Active enhancers are known to be marked by H3K4me1 and H3K27ac [27,2**8**] Additional file 8Genes which have a change in expression combined with a change in the level of H3K4me1 with in 50 kb of the TSS. Shown is gene identification and localization with expression values followed by the values for H3K4me1 marking where this is significantly changed in nearby 500 bp bins. I…	255	26	1.74271	0.00409575	0.0401617	2db839a0-7f46-5fc8-9ce2-10ed6e2afc26
PMC3620534	Genome-wide map of quantified epigenetic changes during in vitro chondrogenic differentiation of primary human mesenchymal stem cells	1471-2164-14-105-S8.xlsx	Sheet1-Unnamed_1	and enhancer regions. Active enhancers are known to be marked by H3K4me1 and H3K27ac [27,2**8**] Additional file 8Genes which have a change in expression combined with a change in the level of H3K4me1 with in 50 kb of the TSS. Shown is gene identification and localization with expression values followed by the values for H3K4me1 marking where this is significantly changed in nearby 500 bp bins. I…	256	26	1.7359	0.00431328	0.0418019	7ac62d90-2a40-5e8b-9684-02844accf3ad
PMC3641034	p63 Attenuates Epithelial to Mesenchymal Potential in an Experimental Prostate Cell Model	pone.0062547.s007.xls	tss_50k-annotation	with a genome-wide p63 ChIP-seq study in human keratinocytes (HFK) [21] showed 46.9% overlap (**Table S3**) Annotated p63 peaks from ChIP-seq using CisGenome within 50 kb from the TSS (transcription start site) of a gene. These data are integrated with ChIP-seq data from Human Foreskin Keratinocyte (HFK) cells after McDade et al. [21].(XLS) Click here for additional data file	1885	149	1.35104	3.8232e-05	0.000817837	8cde2344-e38f-5401-a0e0-c0279e0d8188
PMC3641034	p63 Attenuates Epithelial to Mesenchymal Potential in an Experimental Prostate Cell Model	pone.0062547.s007.xls	tss_10k-annotation	with a genome-wide p63 ChIP-seq study in human keratinocytes (HFK) [21] showed 46.9% overlap (**Table S3**) Annotated p63 peaks from ChIP-seq using CisGenome within 50 kb from the TSS (transcription start site) of a gene. These data are integrated with ChIP-seq data from Human Foreskin Keratinocyte (HFK) cells after McDade et al. [21].(XLS) Click here for additional data file	599	51	1.45524	0.00424341	0.0413307	98b08578-d39c-5d98-8bc3-1dd6e0fa861c
PMC3669213	Sorafenib Inhibits Epithelial-Mesenchymal Transition through an Epigenetic-Based Mechanism in Human Lung Epithelial Cells	pone.0064954.s008.xls	DHMGs_list-Lists_of_DHMGs_reciprocally_regulated_by_sorafenib_during_EMT	Genomes pathway enrichment analysis was performed [15]. DHMGs and enriched pathways are summarized in **Dataset S1** DHMGs reciprocally regulated by sorafenib during EMT and KEGG Pathway Enrichment Analysis. The file contains the lists of DHMGs including H3K4me3, H3K9ac, H3K9me3 and H3K27me3 that are reciprocally regulated by sorafenib during EMT, and KEGG Pathway Enrichment Analysis of these DHM…	1762	160	1.55293	3.02739e-09	1.73588e-07	223cb857-8496-5a39-a98e-428f18e51d0f
PMC3669213	Sorafenib Inhibits Epithelial-Mesenchymal Transition through an Epigenetic-Based Mechanism in Human Lung Epithelial Cells	pone.0064954.s009.xls	DHMGs_list-Lists_of_DHMGs_during_EMT	in good accordance with the results from DHMGs during EMT upon stimulation with TGF-β1 (**Dataset S2**) DHMGs during EMT and KEGG Pathway Enrichment Analysis. The file contains the lists of DHMGs during EMT including H3K4me3, H3K9ac, H3K9me3 and H3K27me3, and KEGG Pathway Enrichment Analysis of these DHMGs.(XLS) Click here for additional data file	2079	175	1.4408	1.02797e-07	4.20673e-06	40329843-0d60-53ed-9ca6-edb94c4b79b2
PMC3669213	Sorafenib Inhibits Epithelial-Mesenchymal Transition through an Epigenetic-Based Mechanism in Human Lung Epithelial Cells	pone.0064954.s009.xls	DHMGs_list-Unnamed_3	in good accordance with the results from DHMGs during EMT upon stimulation with TGF-β1 (**Dataset S2**) DHMGs during EMT and KEGG Pathway Enrichment Analysis. The file contains the lists of DHMGs during EMT including H3K4me3, H3K9ac, H3K9me3 and H3K27me3, and KEGG Pathway Enrichment Analysis of these DHMGs.(XLS) Click here for additional data file	1836	154	1.43677	9.02095e-07	2.95635e-05	a31925d1-7a52-5807-93c3-0e7fed612435
PMC3672751	Embryonic mammary signature subsets are activated in Brca1-/- and basal-like breast cancers	bcr3403-S14.XLS	MM_epithelia-Human_Symbol	expressed within embryonic mammary mesenchymal tissue compared with postnatal mammary cells (see Additional file **14**) Additional file 14Embryonic mammary mesenchymal signature and functional annotation clustering. Table of embryonic mammary epithelial signature based on the expression profiles of genes found highly expressed (10-fold or greater) within mammary mesenchymal cells when compared w…	712	91	2.18451	8.20965e-13	9.13834e-11	7ccb535d-3e11-5857-a50f-8c0e31dbe68a
PMC3672751	Embryonic mammary signature subsets are activated in Brca1-/- and basal-like breast cancers	bcr3403-S15.XLS	UNC337_tumours-Unnamed_8	and could be considered candidate regulators of EMT in breast cancers (see Additional file **15**) Additional file 15Embryonic mesenchymal genes activated in mouse Brca1-/- tumors and basal-like breast cancers. These are from at least two of four datasets examined and Multivariate Cox Proportional Hazard Regression analysis of 172-gene uniquely mesenchymal signature Click here for file	287	38	2.26305	1.9517e-06	5.91917e-05	7a5de576-8aae-5afc-b916-ab7816110a4c
PMC3672751	Embryonic mammary signature subsets are activated in Brca1-/- and basal-like breast cancers	bcr3403-S15.XLS	up_in_2_datasets-Unnamed_6	and could be considered candidate regulators of EMT in breast cancers (see Additional file **15**) Additional file 15Embryonic mesenchymal genes activated in mouse Brca1-/- tumors and basal-like breast cancers. These are from at least two of four datasets examined and Multivariate Cox Proportional Hazard Regression analysis of 172-gene uniquely mesenchymal signature Click here for file	171	26	2.59878	6.87065e-06	0.000181037	59750b61-9724-5eb1-8de2-762c29e2674f
PMC3672751	Embryonic mammary signature subsets are activated in Brca1-/- and basal-like breast cancers	bcr3403-S15.XLS	Sheet1-Unnamed_5	and could be considered candidate regulators of EMT in breast cancers (see Additional file **15**) Additional file 15Embryonic mesenchymal genes activated in mouse Brca1-/- tumors and basal-like breast cancers. These are from at least two of four datasets examined and Multivariate Cox Proportional Hazard Regression analysis of 172-gene uniquely mesenchymal signature Click here for file	347	41	2.01951	1.36004e-05	0.000331762	47b03628-4813-5191-b0c1-0e636f8bf85f
PMC3672751	Embryonic mammary signature subsets are activated in Brca1-/- and basal-like breast cancers	bcr3403-S15.XLS	Sheet1-Common_elements_in_Brca1_and_UNC	and could be considered candidate regulators of EMT in breast cancers (see Additional file **15**) Additional file 15Embryonic mesenchymal genes activated in mouse Brca1-/- tumors and basal-like breast cancers. These are from at least two of four datasets examined and Multivariate Cox Proportional Hazard Regression analysis of 172-gene uniquely mesenchymal signature Click here for file	100	16	2.73472	0.000214983	0.00360829	60a7e6f5-c114-5aac-a571-d79a49923993
PMC3672751	Embryonic mammary signature subsets are activated in Brca1-/- and basal-like breast cancers	bcr3403-S15.XLS	Natrajan_tumours-Unnamed_8	and could be considered candidate regulators of EMT in breast cancers (see Additional file **15**) Additional file 15Embryonic mesenchymal genes activated in mouse Brca1-/- tumors and basal-like breast cancers. These are from at least two of four datasets examined and Multivariate Cox Proportional Hazard Regression analysis of 172-gene uniquely mesenchymal signature Click here for file	74	12	2.77167	0.00113841	0.0145547	ce3551d1-8468-514e-bec1-56094e6c95da
PMC3672751	Embryonic mammary signature subsets are activated in Brca1-/- and basal-like breast cancers	bcr3403-S15.XLS	UNC337_tumours-Four_embryonic_gene_clusters_found_activated_in_breast_cancers_in_UNC-337_dataset	and could be considered candidate regulators of EMT in breast cancers (see Additional file **15**) Additional file 15Embryonic mesenchymal genes activated in mouse Brca1-/- tumors and basal-like breast cancers. These are from at least two of four datasets examined and Multivariate Cox Proportional Hazard Regression analysis of 172-gene uniquely mesenchymal signature Click here for file	47	9	3.27293	0.00140481	0.017224	8a389fa7-d3d1-5330-95c2-3e8e1d4748b0
PMC3672751	Embryonic mammary signature subsets are activated in Brca1-/- and basal-like breast cancers	bcr3403-S15.XLS	up_2_unique_to_mesenchyme-Genes_upregulated_in_basal_tumours_in_at_least_2_datasets_unique_to_mesenchymal_signature	and could be considered candidate regulators of EMT in breast cancers (see Additional file **15**) Additional file 15Embryonic mesenchymal genes activated in mouse Brca1-/- tumors and basal-like breast cancers. These are from at least two of four datasets examined and Multivariate Cox Proportional Hazard Regression analysis of 172-gene uniquely mesenchymal signature Click here for file	171	20	1.99906	0.00238991	0.0263422	ca7c6082-6781-5dc8-8a73-cad0a4fc15e1
PMC3698521	AP4 is a mediator of epithelial–mesenchymal transition and metastasis in colorectal cancer	supp_jem.20120812_JEM_20120812_sm.pdf	43-KLHL21	Supplemental Material	30	7	3.98813	0.00142356	0.0173855	1d6e1037-948d-505f-a107-418b5a64e1bc
PMC3702285	Human mesenchymal stem cell-replicative senescence and oxidative stress are closely linked to aneuploidy	cddis2013211x6.pdf	271-FBXL15	Click here for additional data file	38	8	3.59831	0.00135208	0.0167035	5867786f-12d6-5d3d-9d86-cd821d4db2bc
PMC3702285	Human mesenchymal stem cell-replicative senescence and oxidative stress are closely linked to aneuploidy	cddis2013211x6.pdf	29-ZNF268	Click here for additional data file	40	8	3.4184	0.00191701	0.022048	bb2169ad-efe2-58f4-baef-889801ac88b1
PMC3702285	Human mesenchymal stem cell-replicative senescence and oxidative stress are closely linked to aneuploidy	cddis2013211x6.pdf	219-WDR37	Click here for additional data file	42	8	3.25562	0.0026531	0.0286757	4fba8520-07e8-547e-8e66-9593193bb2f6
PMC3702285	Human mesenchymal stem cell-replicative senescence and oxidative stress are closely linked to aneuploidy	cddis2013211x6.pdf	67-KIDINS220	Click here for additional data file	43	8	3.1799	0.00309549	0.0323321	8e8905e6-00b4-5cb6-bd4b-150196e0b697
PMC3702285	Human mesenchymal stem cell-replicative senescence and oxidative stress are closely linked to aneuploidy	cddis2013211x6.pdf	3-TTC18	Click here for additional data file	45	8	3.03857	0.00415053	0.0405585	2f17bda8-6664-5663-bc85-34b7500438f0
PMC3702285	Human mesenchymal stem cell-replicative senescence and oxidative stress are closely linked to aneuploidy	cddis2013211x6.pdf	7-POMC	Click here for additional data file	46	8	2.97252	0.00477217	0.0454549	ab61c199-3e3d-5d8f-a382-57679be586c3
PMC3702285	Human mesenchymal stem cell-replicative senescence and oxidative stress are closely linked to aneuploidy	cddis2013211x6.pdf	14-A_24_P195714	Click here for additional data file	46	8	2.97252	0.00477217	0.0454549	b4c6c6a8-4a34-5040-a8f8-5c69805d4e91
PMC3750372	Cigarette smoke induces epithelial to mesenchymal transition and increases the metastatic ability of breast cancer cells	1476-4598-12-90-S1.xls	TopTable_MA2_BS_max_abs_lfc__1-Unnamed_2	Cigarette smoke extract (CSE) was prepared weekly by burning 2 complete 1R**3** Additional file 1: Table S1Summary of the results of the gene expression microarray analysis. Probes showing a difference in gene expression of 2-folds or more in at least one clone are shown. The complete data is available in the GEO database under accession number GSE42668 Click here for file	1384	110	1.36043	0.000374048	0.00578322	549f59a9-6bc9-5d12-8d01-9204ce7f283d
PMC3757745	WNT3A Promotes Hematopoietic or Mesenchymal Differentiation from hESCs Depending on the Time of Exposure	mmc2.xlsx	Sheet1-Unnamed_1	WNT3A/BMP4 cultures expressed higher levels of primitive streak and mesoderm associated genes (Figure S2C; **Tables S1**) Table S1. Average Probe Signals in 224 Probe Sets Differing >5.0-Fold in WNT3A (W) GFP+ versus d0 hESC, Related to Figure 1	187	22	2.01082	0.00137905	0.0169805	c8385cef-59cf-56ef-8d6e-54aedc56adb3
PMC3757745	WNT3A Promotes Hematopoietic or Mesenchymal Differentiation from hESCs Depending on the Time of Exposure	mmc6.xlsx	Sheet1-Unnamed_1	ITGA5, and CDH11 as well as many other extracellular matrix (ECM) proteins (Figure 7A; **Table S5**) Table S5. Average Probe Signals and Fold Change of the 689 Probe Sets Upregulated ≥3-Fold in Both WNT3A and BIO Mesospheres Compared to Undifferentiated hESCs, Related to Figure 7	623	55	1.50892	0.00138177	0.0170022	bac9f65c-0e26-5385-bec9-44e1ef2f4f7f
PMC3784416	FHOD1, a Formin Upregulated in Epithelial-Mesenchymal Transition, Participates in Cancer Cell Migration and Invasion	pone.0074923.s003.xlsx	spont_and_ind_venn_table-Unnamed_2	genes (logFC ≤ −2, p≤0.001) in common (Figure 1 A; gene lists presented in **Table S1**) Gene lists utilized in the Venn diagram of Figure 1A . (XLSX) Click here for additional data file	207	26	2.16776	0.000161929	0.00283521	d3414805-0612-5bb1-888d-8edf4c641550
PMC3784416	FHOD1, a Formin Upregulated in Epithelial-Mesenchymal Transition, Participates in Cancer Cell Migration and Invasion	pone.0074923.s003.xlsx	spont_and_ind_venn_table-Unnamed_6	genes (logFC ≤ −2, p≤0.001) in common (Figure 1 A; gene lists presented in **Table S1**) Gene lists utilized in the Venn diagram of Figure 1A . (XLSX) Click here for additional data file	152	19	2.1365	0.00140511	0.017224	da07dcc3-d04f-56d0-8f3d-dd1dd533b8fa
PMC3784416	FHOD1, a Formin Upregulated in Epithelial-Mesenchymal Transition, Participates in Cancer Cell Migration and Invasion	pone.0074923.s003.xlsx	spont_and_ind_venn_table-Unnamed_5	genes (logFC ≤ −2, p≤0.001) in common (Figure 1 A; gene lists presented in **Table S1**) Gene lists utilized in the Venn diagram of Figure 1A . (XLSX) Click here for additional data file	220	23	1.78689	0.0049533	0.0468577	65e135f1-b851-5a21-a213-2fa0456a7b14
PMC3854854	Isolation method and xeno-free culture conditions influence multipotent differentiation capacity of human Wharton’s jelly-derived mesenchymal stem cells	scrt232.pdf	3-GAPDH		8	5	10.6825	3.27316e-05	0.000714462	2e1bba4a-d50e-5704-b7a3-2cac05f4e7c5
PMC3867438	Prolyl-4-Hydroxylase 3 (PHD3) Expression Is Downregulated during Epithelial-to-Mesenchymal Transition	pone.0083021.s009.xlsx	Sheet1-Human_genes_containing_an_LXXLAP_motif_using_scansite3_mit_edu	**Table S2** List of human genes encoding for proteins that contain an LXXLAP motif. Scansite3.mit.edu was used to search for proteins in the Human Ensemble database containing the sequence pattern L-X-X-L-A-P.[41] Protein IDs were converted to Gene IDs, which were uploaded as a gene list into DAVID (http://david.abcc.ncifcrf.gov/) [42], [43]. The complete output list from DAVID is shown in this …	419	48	1.95803	5.94069e-06	0.000159265	0ec953dd-00ba-50f1-9242-dc4d6fef16eb
PMC3867438	Prolyl-4-Hydroxylase 3 (PHD3) Expression Is Downregulated during Epithelial-to-Mesenchymal Transition	pone.0083021.s010.xlsx	Sheet1-LXXLAP-containing_genes_broken_down_by_DAVID_functional_category	**Table S3** List of LXXLAP-containing genes that are functionally related to “Cytoskeleton”, “Cell Projection” and “Cell Adhesion”. The DAVID functional annotation tool (http://david.abcc.ncifcrf.gov/) was used to determine which LXXLAP-containing proteins might be related processes involving cell adhesion or migration[42], [43]. Genes with DAVID annotations in the functional categories of “Cyto…	55	11	3.4184	0.00028794	0.00462477	627a97a9-f6d1-5aa3-9d7c-744aee2747d9
PMC3873889	PDLIM2 regulates transcription factor activity in epithelial-to-mesenchymal transition via the COP9 signalosome	supp_E13-06-0306v1_mc-E13-06-0306-file002.xls	PDLIM2_Gene_list-Unnamed_9	Supplemental Materials	437	56	2.19028	2.3311e-08	1.10467e-06	1daad6f3-a069-5570-9b81-66dbf32176fd
PMC3896774	microRNA-181a has a critical role in ovarian cancer progression through the regulation of the epithelial–mesenchymal transition	ncomms3977-s3.xlsx	Sheet1-Supplementary_Data_2	Supplementary Data 2Genes that are downregulated = 5-fold in A2780-p181a cells compared to their A2780-pBABE control cells. Genes in the table are labelled by gene name and Refseq #	597	55	1.57464	0.000514349	0.00754535	cee56f70-1e33-58e7-94a1-8abeef5217d8
PMC3962334	Widespread FRA1-Dependent Control of Mesenchymal Transdifferentiation Programs in Colorectal Cancer Cells	pone.0088950.s001.pdf	24-SERPINE1	as well as components of TGFβ signaling networks (Figure 4A and Table S1 in **File S1**) Tables S1–S8. Table S1. Relative changes in expression of FRA1 bound EMT-related genes upon FRA1 knockdown in BE CRC cells. Data represent means from 3 independent RNA-Seq experiments. Table S2. ChIP-Seq reads identified near FRA1EMT genes. Table S3. AP-1 consensus motifs identified in FRA1EMT genes. Table S4…	14	5	6.10428	0.000870271	0.0116338	c7334044-45e7-52ef-b827-4b1c10ca4206
PMC3985196	Comparison of Long Noncoding RNA and mRNA Expression Profiles in Mesenchymal Stem Cells Derived from Human Periodontal Ligament and Bone Marrow	317853.f1.pdf	21-TOM1L1	Expression profiles of lncRNA and mRNA between bone marrow stem cells (BMSCs) and periodontal ligament stem cells (PDLSCs) were investigated with lncRNA microarray assays and bioinformatics analysis. In PDLSCs, 970 lncRNAs that were significantly differentially expressed compared to BMSCs (Supplementary Table 1). Furthermore, 1,578 mRNAs were differentially expressed in the PDLSCs and BMSCs (Supp…	41	12	5.00253	2.43552e-06	7.20525e-05	5cad342a-5a77-5ab9-a126-d3a26079c442
PMC3985196	Comparison of Long Noncoding RNA and mRNA Expression Profiles in Mesenchymal Stem Cells Derived from Human Periodontal Ligament and Bone Marrow	317853.f1.pdf	54-PLCB4	Expression profiles of lncRNA and mRNA between bone marrow stem cells (BMSCs) and periodontal ligament stem cells (PDLSCs) were investigated with lncRNA microarray assays and bioinformatics analysis. In PDLSCs, 970 lncRNAs that were significantly differentially expressed compared to BMSCs (Supplementary Table 1). Furthermore, 1,578 mRNAs were differentially expressed in the PDLSCs and BMSCs (Supp…	54	13	4.11474	1.01576e-05	0.000256022	f4fe29ca-b79e-5a93-951c-0e73cd0de71f
PMC3985196	Comparison of Long Noncoding RNA and mRNA Expression Profiles in Mesenchymal Stem Cells Derived from Human Periodontal Ligament and Bone Marrow	317853.f1.pdf	41-SMAD9	Expression profiles of lncRNA and mRNA between bone marrow stem cells (BMSCs) and periodontal ligament stem cells (PDLSCs) were investigated with lncRNA microarray assays and bioinformatics analysis. In PDLSCs, 970 lncRNAs that were significantly differentially expressed compared to BMSCs (Supplementary Table 1). Furthermore, 1,578 mRNAs were differentially expressed in the PDLSCs and BMSCs (Supp…	41	10	4.16878	9.5042e-05	0.00180013	f5e48f57-77fa-5e3d-90ee-7339e110adc2
PMC3985196	Comparison of Long Noncoding RNA and mRNA Expression Profiles in Mesenchymal Stem Cells Derived from Human Periodontal Ligament and Bone Marrow	317853.f1.pdf	25-CKAP2L	Expression profiles of lncRNA and mRNA between bone marrow stem cells (BMSCs) and periodontal ligament stem cells (PDLSCs) were investigated with lncRNA microarray assays and bioinformatics analysis. In PDLSCs, 970 lncRNAs that were significantly differentially expressed compared to BMSCs (Supplementary Table 1). Furthermore, 1,578 mRNAs were differentially expressed in the PDLSCs and BMSCs (Supp…	38	9	4.0481	0.000269719	0.00437361	9518d9e8-3d47-5e19-9b17-4396bc78eecb
PMC3985196	Comparison of Long Noncoding RNA and mRNA Expression Profiles in Mesenchymal Stem Cells Derived from Human Periodontal Ligament and Bone Marrow	317853.f1.pdf	18-gene_symbol	Expression profiles of lncRNA and mRNA between bone marrow stem cells (BMSCs) and periodontal ligament stem cells (PDLSCs) were investigated with lncRNA microarray assays and bioinformatics analysis. In PDLSCs, 970 lncRNAs that were significantly differentially expressed compared to BMSCs (Supplementary Table 1). Furthermore, 1,578 mRNAs were differentially expressed in the PDLSCs and BMSCs (Supp…	41	8	3.33502	0.00226167	0.0252089	f1ac7204-e2fc-5d12-a7d1-286c67e31548
PMC3985196	Comparison of Long Noncoding RNA and mRNA Expression Profiles in Mesenchymal Stem Cells Derived from Human Periodontal Ligament and Bone Marrow	317853.f1.pdf	43-EFCAB4B	Expression profiles of lncRNA and mRNA between bone marrow stem cells (BMSCs) and periodontal ligament stem cells (PDLSCs) were investigated with lncRNA microarray assays and bioinformatics analysis. In PDLSCs, 970 lncRNAs that were significantly differentially expressed compared to BMSCs (Supplementary Table 1). Furthermore, 1,578 mRNAs were differentially expressed in the PDLSCs and BMSCs (Supp…	42	8	3.25562	0.0026531	0.0286757	d75a6e52-046e-519b-b9c4-1aed00146ffa
PMC3985196	Comparison of Long Noncoding RNA and mRNA Expression Profiles in Mesenchymal Stem Cells Derived from Human Periodontal Ligament and Bone Marrow	317853.f1.pdf	20-CACNA1C	Expression profiles of lncRNA and mRNA between bone marrow stem cells (BMSCs) and periodontal ligament stem cells (PDLSCs) were investigated with lncRNA microarray assays and bioinformatics analysis. In PDLSCs, 970 lncRNAs that were significantly differentially expressed compared to BMSCs (Supplementary Table 1). Furthermore, 1,578 mRNAs were differentially expressed in the PDLSCs and BMSCs (Supp…	42	8	3.25562	0.0026531	0.0286757	fba5824e-84ea-585c-95a9-dd460e9f068f
PMC4011561	The transcriptional network for mesenchymal transformation of brain tumors	NIHMS165691-supplement-2.xlsx	Table_S2-Unnamed_1	(GBM) samples previously classified into three molecular signature groups – proneural, proliferative, and mesenchymal (**Supplementary Table 1a–c**)	914	97	1.82189	3.79415e-09	2.13157e-07	37b725e7-7b38-5037-bd15-0b13a4237191
PMC4011561	The transcriptional network for mesenchymal transformation of brain tumors	NIHMS165691-supplement-2.xlsx	Table_S3-Unnamed_2	(GBM) samples previously classified into three molecular signature groups – proneural, proliferative, and mesenchymal (**Supplementary Table 1a–c**)	49	9	3.13934	0.00190747	0.0219892	f796ef6e-911b-533d-b470-309b13e2f8cb
PMC4015996	Analysis of the Effects of Five Factors Relevant to In Vitro Chondrogenesis of Human Mesenchymal Stem Cells Using Factorial Design and High Throughput mRNA-Profiling	pone.0096615.s002.xls	Design_Data-Unnamed_8	For the digital mRNA profiling, a custom chondrogenic gene set consisting of 364 genes (**Appendix S2**) Nanostring Gene Set. (XLS) Click here for additional data file	362	38	1.79419	0.000334959	0.00526231	e468d64c-1d6a-55f6-a26f-f85ad08b1fcc
PMC4015996	Analysis of the Effects of Five Factors Relevant to In Vitro Chondrogenesis of Human Mesenchymal Stem Cells Using Factorial Design and High Throughput mRNA-Profiling	pone.0096615.s002.xls	Design_Data-Supporting_Information_Appendix_S2_Geneset_of_chondrogenesis_related_genes_in_the_custom_made_multiplexed_Nanostring_geneset	For the digital mRNA profiling, a custom chondrogenic gene set consisting of 364 genes (**Appendix S2**) Nanostring Gene Set. (XLS) Click here for additional data file	357	37	1.77144	0.000509333	0.00748117	52d622ae-cbe3-5ff1-a53d-4f16982534f1
PMC4034764	Dynamic Chromatin Modification Sustains Epithelial-Mesenchymal Transition following Inducible Expression of Snail-1	NIHMS554252-supplement-3.xls	Sheet1-Unnamed_2		449	54	2.05561	3.38275e-07	1.23085e-05	e02d4c0d-433f-569e-b92a-6d81c538d1c4
PMC4034764	Dynamic Chromatin Modification Sustains Epithelial-Mesenchymal Transition following Inducible Expression of Snail-1	NIHMS554252-supplement-02.xls	Sheet1-Unnamed_2	VI, transiently induced transcripts (between 6 and 72 hr, n = 64; Figure 2B; **Tables S1**)	651	69	1.81159	9.7959e-07	3.1824e-05	0ce5d100-a979-5e4d-a9df-b8b8047adb69
PMC4053266	A multivariate approach to the integration of multi-omics datasets	1471-2105-15-162-S2.xlsx	NCI60_marker_full_list-Genes	that epithelial-mesenchymal transition (EMT) is an essential mechanism defining different classes of cancers (Figure **2**) Additional file 2: Table S1Full list of biological markers highly weighted on each MCIA axis of the NCI-60 data Click here for file	1178	107	1.5525	2.04792e-06	6.17299e-05	f695b5bc-b835-561a-8928-95e497968332
PMC4110792	Direct Genesis of Functional Rodent and Human Schwann Cells from Skin Mesenchymal Precursors	mmc2.xlsx	Sheet1-Gene	linear models demonstrated that a subset of genes were significantly differentially expressed (Figure 6G; **Table S1**) Table S1. List of Genes from Analysis of Human SKPs Microarray as Shown in Figure 6EGenes determined to be greater than 2-fold different between human facial foreskin SKPs (i.e., greater than 1 on the log2 scale) with an adjusted p value less than 0.05 are listed	394	54	2.35451	3.36003e-09	1.90758e-07	230fec7b-153f-5c8b-97b3-2ced005ab05e
PMC4205225	Ubiquilin1 Represses Migration and Epithelial to Mesenchymal Transition of Human Non-small Cell Lung Cancer Cells	NIHMS574515-supplement-6.xlsx	Sheet1-Gene_Symbol	for genes involved in cell movement, cell growth and proliferation and cancer. (fig. 2c, **Table S1**)	305	30	1.68118	0.00365522	0.036802	2dfb18b0-44f1-5bf4-ba73-42c29594d8c1
PMC4234005	Colorectal cancer intrinsic subtypes predict chemotherapy benefit, deficient mismatch repair and epithelial-to-mesenchymal transition	ijc0134-0552.nxml	Unnamed_4	gene expression signatures representative for the molecular subtypes were used for sample classification (Table **2**) Gene signatures for classification of intrinsic CRC subtypesASPMORC6LZNF367NIPSNAP1SPBC25DIAPH3	31	7	3.85948	0.00174716	0.0205599	8d8c4aa6-d991-5380-8440-0a367c71fc91
PMC4237271	microRNA-320/RUNX2 axis regulates adipocytic differentiation of human mesenchymal (skeletal) stem cells	cddis2014462x3.xlsx	Sheet1-Unnamed_16	Click here for additional data file	2334	208	1.52385	2.74747e-11	2.32053e-09	3f5e4abb-5400-5e43-9c17-0c208afe78b7
PMC4237271	microRNA-320/RUNX2 axis regulates adipocytic differentiation of human mesenchymal (skeletal) stem cells	cddis2014462x4.xlsx	Down_adipo_D10-Unnamed_16	Click here for additional data file	1321	114	1.47501	9.98719e-06	0.000252321	ae859e6c-9921-5d9a-8a4d-fb13ff634abb
PMC4237393	Proteomic-Coupled-Network Analysis of T877A-Androgen Receptor Interactomes Can Predict Clinical Prostate Cancer Outcomes between White (Non-Hispanic) and African-American Groups	pone.0113190.s006.xls	Geneset_8-White_---_DHT_Charaffe_-_breast_cancer_luminal_vs_mesenchymal_dn	**Table S4** GO-Term definitions of T877A-AR Gene-sets 1–10. (XLS) Click here for additional data file	429	40	1.59366	0.00233086	0.025827	39e251cf-5c16-571e-bb68-4f9e4015a086
PMC4264066	Low/Negative Expression of PDGFR-α Identifies the Candidate Primary Mesenchymal Stromal Cells in Adult Human Bone Marrow	mmc2.xlsx	Sheet1-Table_S1_related_to_Figure_1_Up-_and_down-_regulated_genes_in	genes as well as genes encoding for cytokines, growth factors, and extracellular matrix proteins (**Table S1**) Table S1. Upregulated and Downregulated Genes in lin−/CD45−/CD271+ Cells, Related to Figure 1	292	35	2.0487	4.26168e-05	0.000899459	a2ce0bdb-aeee-5fc8-bb7e-89d9c87dae7c
PMC4266008	Epigenetic Rejuvenation of Mesenchymal Stromal Cells Derived from Induced Pluripotent Stem Cells	mmc2.xlsx	iPS-MSCs_-_day_0_vs_day_7-Unnamed_16	Gradual changes in gene expression were already observed during the first week of differentiation (**Table S1**) Table S1. Differential Gene Expression and DNA Methylation in iPSCs versus iPS-MSCs Day 7	1244	141	1.93727	4.30809e-15	6.99457e-13	7f606d83-3aaa-5033-a602-1af3346e90aa
PMC4266008	Epigenetic Rejuvenation of Mesenchymal Stromal Cells Derived from Induced Pluripotent Stem Cells	mmc3.xlsx	iPS-MSC_vs_MSC-Unnamed_24	between MSCs and iPS-MSCs (2-fold differential expression and adjusted p value <0.01; Figure 2E; **Table S2**) Table S2. Differential Gene Expression and DNA Methylation in iPS-MSCs versus MSCs	1209	137	1.94002	1.02181e-14	1.55999e-12	ebd37b9a-d93a-5ff3-8aff-be74e6a6338c
PMC4287589	Transcriptomic portrait of human Mesenchymal Stromal/Stem cells isolated from bone marrow and placenta	12864_2014_6787_MOESM13_ESM.xls	Additional-Table5-GENES	to Cuffdiff, 125 were up-regulated in BM-MSCs and 78 up-regulated in PL-MSCs (Additional file **13**) Additional file 13: Table S5: Table containing the 203 genes differentially expressed between PL-MSC and BM-MSC and all the statistical parameters provided by the two methods (Cuffdiff and DEseq) applied to detect such genes. (XLS 122 KB)	186	24	2.20542	0.000219566	0.00366818	cdf0e0a5-b9d5-5ce9-b151-096470f0a07c
PMC4287589	Transcriptomic portrait of human Mesenchymal Stromal/Stem cells isolated from bone marrow and placenta	12864_2014_6787_MOESM13_ESM.xls	Additional-Table5-Unnamed_2	to Cuffdiff, 125 were up-regulated in BM-MSCs and 78 up-regulated in PL-MSCs (Additional file **13**) Additional file 13: Table S5: Table containing the 203 genes differentially expressed between PL-MSC and BM-MSC and all the statistical parameters provided by the two methods (Cuffdiff and DEseq) applied to detect such genes. (XLS 122 KB)	188	24	2.18196	0.00025834	0.0042184	578f811e-0816-54b8-a8fc-c47b587756b7
PMC4336716	Breast cancer cells promote a notch-dependent mesenchymal phenotype in endothelial cells participating to a pro-tumoral niche	12967_2015_386_MOESM2_ESM.xls	Cardiovascular_Development-Unnamed_19		90	13	2.46884	0.00214456	0.0241596	4b540b53-9b34-596e-87d5-660dc3d64bab
PMC4336716	Breast cancer cells promote a notch-dependent mesenchymal phenotype in endothelial cells participating to a pro-tumoral niche	12967_2015_386_MOESM2_ESM.xls	Cardiovascular_Development-Vascular_Development		91	13	2.44171	0.00237114	0.0261742	b391ba37-bda9-5764-b7b4-b995bc2d6d08
PMC4447403	Stemness of the hybrid Epithelial/Mesenchymal State in Breast Cancer and Its Association with Poor Survival	pone.0126522.s008.xlsx	SI_table_1_EM_HMLER_150_genes-Unnamed_7	single cell-sorting we generated morphologically stable (> 20 passages) CD24+/CD44-(E) clones and CD24-/CD44+(M) clones (**S1**) (Related to Fig 1): E_HMLER (150) and M_HMLER (150) signatures.The 150 most differentially expressed HMLER genes associated with respective E or M morphology were derived from relative expression of grouped stable morphological E versus morphological M clones, respectiv…	124	20	2.75677	3.25837e-05	0.000712094	290476d5-a7b9-5be5-a00c-f11498be4539
PMC4467436	Coexpression analysis of CD133 and CD44 identifies Proneural and Mesenchymal subtypes of glioblastoma multiforme	oncotarget-06-6267-s002.xlsx	140527_cd44Cutoff_txt-NES-M	length with each cell surface marker mRNA was used to build a coexpression module (**Table S1**)	474	47	1.69477	0.000263225	0.00428976	315286b1-49ad-5aa2-a999-b52f08e2c97e
PMC4467436	Coexpression analysis of CD133 and CD44 identifies Proneural and Mesenchymal subtypes of glioblastoma multiforme	oncotarget-06-6267-s002.xlsx	140527_cd44Cutoff_txt-ITGA6-M	length with each cell surface marker mRNA was used to build a coexpression module (**Table S1**)	489	47	1.64279	0.000526534	0.0077019	c1e8a9ab-dc7b-5d6a-a2cb-220566985895
PMC4477208	dbEMT: an epithelial-mesenchymal transition associated gene resource	srep11459-s1.xls	endeavour_results-Gene	Supplementary Information	335	36	1.83675	0.000305058	0.0048642	d1c1ff40-43bb-56aa-b443-03a82a30a38b
PMC4477208	dbEMT: an epithelial-mesenchymal transition associated gene resource	srep11459-s1.xls	endeavour_results-Symbol	Supplementary Information	337	36	1.82585	0.000341874	0.00535155	f31d4719-1209-53cf-8c2d-181f49dab9e1
PMC4501333	ATF4 licenses C/EBPβ activity in human mesenchymal stem cells primed for adipogenesis	elife06821s001.xlsx	by_enhancer-Unnamed_1	uncommitted, HD-primed, and DMI-induced RNAPII clusters mapped to distinct gene ontologies (GOs) (Figure 1B, **Supplementary file 1**) Gene Lists Associated with Gene Ontology Analysis, Related to Figure 1. RNAPII regions were mapped to nearby genes using GREAT (McLean et al., 2010). RNAPII occupancy was scored for each gene as a function of cell density and DMI treatment and genes showing correl…	1563	132	1.44439	5.05736e-06	0.000138008	1b065853-1af9-5dc8-847c-a6a97389d1f1
PMC4501333	ATF4 licenses C/EBPβ activity in human mesenchymal stem cells primed for adipogenesis	elife06821s001.xlsx	by_Gene-Gene_Lists_Associated_with_Gene_Ontology_Analysis_Related_to_Figure_1	uncommitted, HD-primed, and DMI-induced RNAPII clusters mapped to distinct gene ontologies (GOs) (Figure 1B, **Supplementary file 1**) Gene Lists Associated with Gene Ontology Analysis, Related to Figure 1. RNAPII regions were mapped to nearby genes using GREAT (McLean et al., 2010). RNAPII occupancy was scored for each gene as a function of cell density and DMI treatment and genes showing correl…	1563	132	1.44439	5.05736e-06	0.000138008	1b065853-1af9-5dc8-847c-a6a97389d1f1
PMC4506435	Benefits of biphasic calcium phosphate hybrid scaffold-driven osteogenic differentiation of mesenchymal stem cells through upregulated leptin receptor expression	13018_2015_Article_236.pdf	2-MAFB		20	5	4.273	0.00502658	0.0472164	9d40b117-00da-5676-ad12-d83ce5403ffd
PMC4506436	Analysis of the TGFβ-induced program in primary airway epithelial cells shows essential role of NF-κB/RelA signaling network in type II epithelial mesenchymal transition	12864_2015_1707_MOESM2_ESM.xlsx	CPvCM_pv00001Bon_FC2x_UP_ONLY-Gene_Names		1355	111	1.40326	0.000106656	0.00198969	c04c3451-5837-539d-8473-3be1eb4684bb
PMC4506436	Analysis of the TGFβ-induced program in primary airway epithelial cells shows essential role of NF-κB/RelA signaling network in type II epithelial mesenchymal transition	12864_2015_1707_MOESM9_ESM.xlsx	lrtM3_T12PvCPbon01-Genes		515	45	1.49347	0.00442139	0.0427203	760cc585-a94d-595f-8e84-de237a2a186a
PMC4525178	A draft network of ligand–receptor-mediated multicellular signalling in human	ncomms8866-s7.xlsx	gene_lists-mesenchymal_endothelial	Supplementary Data 6Major signalling pairs of cells based on maximum receptor and ligand expression values and extended Gene Ontology enrichment analysis results	48	11	3.91691	7.91541e-05	0.00153716	3f8f6b53-d773-5837-af88-0d55b9b0cb19
PMC4561317	Mesenchymal Stromal Cell-Derived Factors Promote Tissue Repair in a Small-for-Size Ischemic Liver Model but Do Not Protect against Early Effects of Ischemia and Reperfusion Injury	202975.f1.xls	634-mgigene	Supplementary Table S1: To elucidate effects of MSC-CM on ischemia and reperfusion injury and hepatic proliferation, proteins present in the twenty-five-fold concentrated serum-free MSC-CM (50-kD molecular cut-off filters) was analyzed by Mass Spectrometry	507	45	1.52607	0.00296796	0.0313747	25e0e141-e643-562e-9b5f-9bef6a57dbd3
PMC4561317	Mesenchymal Stromal Cell-Derived Factors Promote Tissue Repair in a Small-for-Size Ischemic Liver Model but Do Not Protect against Early Effects of Ischemia and Reperfusion Injury	202975.f1.xls	634-entrez_description	Supplementary Table S1: To elucidate effects of MSC-CM on ischemia and reperfusion injury and hepatic proliferation, proteins present in the twenty-five-fold concentrated serum-free MSC-CM (50-kD molecular cut-off filters) was analyzed by Mass Spectrometry	477	43	1.54079	0.00305801	0.0321505	c129bc97-47e3-56bb-bcd5-625a81958cee
PMC4561317	Mesenchymal Stromal Cell-Derived Factors Promote Tissue Repair in a Small-for-Size Ischemic Liver Model but Do Not Protect against Early Effects of Ischemia and Reperfusion Injury	202975.f1.xls	634-homologene	Supplementary Table S1: To elucidate effects of MSC-CM on ischemia and reperfusion injury and hepatic proliferation, proteins present in the twenty-five-fold concentrated serum-free MSC-CM (50-kD molecular cut-off filters) was analyzed by Mass Spectrometry	513	45	1.4993	0.00411913	0.0403597	9c74ae1d-23ac-5636-b653-0c75d0e48d62
PMC4580618	Transcription Adaptation during In Vitro Adipogenesis and Osteogenesis of Porcine Mesenchymal Stem Cells: Dynamics of Pathways, Biological Processes, Up-Stream Regulators, and Gene Networks	pone.0137644.s025.xlsx	Upstream_regulators_by_cluster-Upstream_regulators	each cluster (i.e., identification of the enrichment of putative upstream TFs, Table 1 and **S10 File**) Transcription factors with significant overlap with the genes in clusters.The Excel file contains one sheet with the results of the transcription factor analysis in each cluster performed using Ingenuity Pathway Analysis.(XLSX) Click here for additional data file	1504	127	1.45002	6.57343e-06	0.000174124	359c0281-bac5-5b0c-8950-6a0d5c506ca5
PMC4580618	Transcription Adaptation during In Vitro Adipogenesis and Osteogenesis of Porcine Mesenchymal Stem Cells: Dynamics of Pathways, Biological Processes, Up-Stream Regulators, and Gene Networks	pone.0137644.s025.xlsx	Upstream_transcription_factors-Upstream_regulators	each cluster (i.e., identification of the enrichment of putative upstream TFs, Table 1 and **S10 File**) Transcription factors with significant overlap with the genes in clusters.The Excel file contains one sheet with the results of the transcription factor analysis in each cluster performed using Ingenuity Pathway Analysis.(XLSX) Click here for additional data file	350	40	1.95897	3.48833e-05	0.000755407	d4a285b9-1c32-5911-832c-1e9897d35a30
PMC4580618	Transcription Adaptation during In Vitro Adipogenesis and Osteogenesis of Porcine Mesenchymal Stem Cells: Dynamics of Pathways, Biological Processes, Up-Stream Regulators, and Gene Networks	pone.0137644.s021.xlsx	Sheet1-Upstream_regulators	of the analysis of up-stream regulators among the DEG during differentiation are available in **S6 File** Complete results of the ups-stream regulators of DEG.The most relevant up-stream regulators of DEG in each MSC type during adipogenic and osteogenic differentiation were uncovered using Ingenuity Pathway Analysis. Red and green shade denote up-stream regulator deemed to be activated and inhib…	818	75	1.57288	5.1966e-05	0.00106993	a82d2142-7a6f-508f-92f6-c1e3c361f0a2
PMC4599295	Dual regulation by microRNA-200b-3p and microRNA-200b-5p in the inhibition of epithelial-to-mesenchymal transition in triple-negative breast cancer	oncotarget-06-16638.nxml	miR-200b-5p	To evaluate the effects of miR-200b-**3** Loss of 3ʹUTR in genes with miR-200b-3p and miR-200b-5p seed sitesTarget geneAHRALG2AQRBTBD1CHSY1CPNE3EPT1FZD3HNRNPUKCTD12LAP3NAMPTORC2PCMTD2PPRC1RAP2ASDPRUBE3AUHMK1UHRF1BP1USP22WDFY3	22	8	6.21527	2.03776e-05	0.000472525	1f705809-36d8-5c64-b1b9-48625c7284f7
PMC4737105	Proteomic analysis of integrin‐associated complexes from mesenchymal stem cells	PRCA-10-51-s001.xlsx	Adhesome_proteins-Supplementary_data_List_of_Adhesome_proteins	Supplementary data: General Sample and Data Analysis Statistics Click here for additional data file	232	29	2.1365	9.02057e-05	0.00172302	065fa318-7f8d-52a1-9cf2-b74bd864fa2f
PMC4737105	Proteomic analysis of integrin‐associated complexes from mesenchymal stem cells	PRCA-10-51-s001.xlsx	Adhesome_proteins-Unnamed_1	Supplementary data: General Sample and Data Analysis Statistics Click here for additional data file	232	29	2.1365	9.02057e-05	0.00172302	065fa318-7f8d-52a1-9cf2-b74bd864fa2f
PMC4741438	Targeting the SIN3A-PF1 interaction inhibits epithelial to mesenchymal transition and maintenance of a stem cell phenotype in triple negative breast cancer	oncotarget-06-34087-s005.xlsx	Table_S6-Upstream_Regulator	−2.6 and SMAD4 (z score: −2.2), four major inducers of EMT (Tables S5 and **S6**)	580	56	1.65597	0.000128251	0.00232759	1f5def9d-302d-54c1-8060-801a07cde7eb
PMC4744188	Pervasive transcription read-through promotes aberrant expression of oncogenes and RNA chimeras in renal carcinoma	elife-09214-supp1.xlsx	A-geneName	high number of reads mapping downstream the transcription termination site (TTS) (Figure 1A,B and **Supplementary file 1A**) (A) Genes with transcription read-through identified in human ccRCC TCGA samples. (B) Genes involved in transcription termination and pre-mRNA processing with mutations in TCGA samples. (C) Genes with transcription read-through identified in human ccRCC cell lines. (D) Gene…	1949	162	1.42068	8.57912e-07	2.82449e-05	f3bdedac-58f0-5258-93e5-42e99ebceaa3
PMC4744188	Pervasive transcription read-through promotes aberrant expression of oncogenes and RNA chimeras in renal carcinoma	elife-09214-supp1.xlsx	E-geneName	high number of reads mapping downstream the transcription termination site (TTS) (Figure 1A,B and **Supplementary file 1A**) (A) Genes with transcription read-through identified in human ccRCC TCGA samples. (B) Genes involved in transcription termination and pre-mRNA processing with mutations in TCGA samples. (C) Genes with transcription read-through identified in human ccRCC cell lines. (D) Gene…	302	30	1.69788	0.00316256	0.0329062	0e8929db-dff8-5bc6-bb1a-04faa1967513
PMC4746611	SIRT6 safeguards human mesenchymal stem cells from oxidative stress by coactivating NRF2	cr20164x8.xlsx	Late_passage-UP_regulated-Supplementary_information_Table_S2_Up-_and_downregulated_genes_in_SIRT6_hMSCs_relative_to_WT_hMSCs_late_passage	Up- and downregulated genes in SIRT6−/− hMSCs relative to WT hMSCs (late passage) Click here for additional data file	187	22	2.01082	0.00137905	0.0169805	ea4eed13-186f-5380-a048-5b394a89c40d
PMC4746611	SIRT6 safeguards human mesenchymal stem cells from oxidative stress by coactivating NRF2	cr20164x8.xlsx	Late_passage-DOWN_regulated-gene	Up- and downregulated genes in SIRT6−/− hMSCs relative to WT hMSCs (late passage) Click here for additional data file	346	34	1.67956	0.00208437	0.0236554	cd33557e-31a1-57d8-bf5f-8db055f69352
PMC4746611	SIRT6 safeguards human mesenchymal stem cells from oxidative stress by coactivating NRF2	cr20164x7.xlsx	Early_passage-DOWN_regulated-Supplementary_information_Table_S1_Up-_and_downregulated_genes_in_SIRT6_hMSCs_relative_to_WT_hMSCs_early_passage	Up- and downregulated genes in SIRT6−/− hMSCs relative to WT hMSCs (early passage) Click here for additional data file	237	25	1.80295	0.00309802	0.0323425	0e5d38f9-bcec-5907-a666-82cb4c95eb1d
PMC4751672	Bone marrow-derived mesenchymal stromal cells differ in their attachment to fibronectin-derived peptides from term placenta-derived mesenchymal stromal cells	13287_2015_243_MOESM1_ESM.xlsx	Suppl-Supplementary_Table		558	58	1.77978	1.25495e-05	0.000309244	62b612aa-779f-52d4-af2d-e8e2b2d0572b
PMC4797178	Snail-induced epithelial-to-mesenchymal transition of MCF-7 breast cancer cells: systems analysis of molecular changes and their effect on radiation and drug sensitivity	12885_2016_2274_MOESM8_ESM.xls	Interactions_Report-Unnamed_3		426	46	1.84561	4.14887e-05	0.000879075	ea7c6339-752b-5227-9a53-76099dec9db4
PMC4811172	A molecular classification of human mesenchymal stromal cells	peerj-04-1845-s004.xlsx	DEG_bone_marrow_vs_all-ENSEMBL_ID	(black plot, n = 16). See also Fig. S3 and Tables S4, S5 and **S6** Supplementary Table S6Table S6. (auxiliary spreadsheet). Top Differentially expressed genes between MSC from bone marrow compared to other sites. Linear mixed model, FDR adjusted P < 0.01. Top Differentially expressed genes between MSC from different sites. Linear mixed model, FDR adjusted P < 0.01 Click here for additional data …	2211	187	1.44559	2.45943e-08	1.15932e-06	fc583033-a36a-5fad-8bab-5435d0606d91
PMC4820705	MicroRNA profiling of cisplatin-resistant oral squamous cell carcinoma cell lines enriched with cancer-stem-cell-like and epithelial-mesenchymal transition-type features	srep23932-s5.xls	Sheet1-Unnamed_1	Supplementary Table S4	490	53	1.84872	1.03882e-05	0.000261279	6681b16b-7305-5d42-9fc4-432995918cda
PMC4820705	MicroRNA profiling of cisplatin-resistant oral squamous cell carcinoma cell lines enriched with cancer-stem-cell-like and epithelial-mesenchymal transition-type features	srep23932-s4.xls	Sheet1-Table_S8_List_of_up_and_down_regulated_fold_change_1_00_and_P-value_0_05_target_mRNAs	Supplementary Table S3	2277	177	1.32921	1.42764e-05	0.000346302	a4550a5a-05b6-51b4-b23c-97b34d67e301
PMC4823931	Adipogenic placenta-derived mesenchymal stem cells are not lineage restricted by withdrawing extrinsic factors: developing a novel visual angle in stem cell biology	cddis20161x4.xls	a-Gene_Symbol	Click here for additional data file	2347	213	1.55117	2.60057e-12	2.66141e-10	ff61b191-678f-527a-bcfd-1d4a6df807d6
PMC4823931	Adipogenic placenta-derived mesenchymal stem cells are not lineage restricted by withdrawing extrinsic factors: developing a novel visual angle in stem cell biology	cddis20161x4.xls	a-Ensembl	Click here for additional data file	2255	201	1.5235	6.98236e-11	5.5125e-09	85e44138-28c2-576c-a20c-5d2a4192ba04
PMC4823931	Adipogenic placenta-derived mesenchymal stem cells are not lineage restricted by withdrawing extrinsic factors: developing a novel visual angle in stem cell biology	cddis20161x3.xls	a-Gene_Symbol	Click here for additional data file	2013	176	1.49438	6.94194e-09	3.70123e-07	65159b61-b677-5dde-85ba-d99e80932850
PMC4823931	Adipogenic placenta-derived mesenchymal stem cells are not lineage restricted by withdrawing extrinsic factors: developing a novel visual angle in stem cell biology	cddis20161x3.xls	a-Ensembl	Click here for additional data file	1936	167	1.47436	4.84576e-08	2.1394e-06	ad35c543-4ff9-5bc1-ae74-4c4c318d8a61
PMC4823931	Adipogenic placenta-derived mesenchymal stem cells are not lineage restricted by withdrawing extrinsic factors: developing a novel visual angle in stem cell biology	cddis20161x4.xls	c-Gene_Symbol	Click here for additional data file	841	86	1.74781	2.00307e-07	7.68232e-06	26e2aace-9f20-506b-ae6c-af4a621f62c1
PMC4823931	Adipogenic placenta-derived mesenchymal stem cells are not lineage restricted by withdrawing extrinsic factors: developing a novel visual angle in stem cell biology	cddis20161x4.xls	c-Ensembl	Click here for additional data file	792	82	1.76962	2.35566e-07	8.88812e-06	06ecb354-320d-57db-8452-b2865861ab20
PMC4823931	Adipogenic placenta-derived mesenchymal stem cells are not lineage restricted by withdrawing extrinsic factors: developing a novel visual angle in stem cell biology	cddis20161x3.xls	b-Ensembl	Click here for additional data file	857	85	1.69524	8.54576e-07	2.81509e-05	814b5dc8-8f02-55e3-91c8-cd28c41ec137
PMC4823931	Adipogenic placenta-derived mesenchymal stem cells are not lineage restricted by withdrawing extrinsic factors: developing a novel visual angle in stem cell biology	cddis20161x3.xls	b-Gene_Symbol	Click here for additional data file	899	87	1.65406	1.73885e-06	5.33507e-05	4e819f53-10b6-58d2-a282-185e1ffd8ef3
PMC4823931	Adipogenic placenta-derived mesenchymal stem cells are not lineage restricted by withdrawing extrinsic factors: developing a novel visual angle in stem cell biology	cddis20161x4.xls	b-Gene_Symbol	Click here for additional data file	1506	127	1.44136	8.79296e-06	0.000225644	fc6d4f3f-f4f5-555d-a850-2203de0fb981
PMC4823931	Adipogenic placenta-derived mesenchymal stem cells are not lineage restricted by withdrawing extrinsic factors: developing a novel visual angle in stem cell biology	cddis20161x4.xls	b-Ensembl	Click here for additional data file	1463	119	1.39026	8.55486e-05	0.00164301	e13d5b78-e666-5446-a96f-ddc9c4c7168e
PMC4823931	Adipogenic placenta-derived mesenchymal stem cells are not lineage restricted by withdrawing extrinsic factors: developing a novel visual angle in stem cell biology	cddis20161x3.xls	c-Gene_Symbol	Click here for additional data file	1114	89	1.36552	0.00127756	0.0159477	82ad6ec9-c407-57d7-a18a-2cc15db6a315
PMC4912436	No Identical “Mesenchymal Stem Cells” at Different Times and Sites: Human Committed Progenitors of Distinct Origin and Differentiation Potential Are Incorporated as Adventitial Cells in Microvessels	mmc2.xlsx	Sheet1-Unnamed_1	widely used “minimum” surface phenotype. ANOVA-based supervised analysis selected 1,614 class-specific, differentially expressed genes (**Table S1**) Table S1. Over- and Under-represented Genes in BM, MU, PE, and CB Cells as Computed by Supervised Analysis	1141	98	1.46802	5.47175e-05	0.00111835	15eaa63d-141c-5fe4-bee8-1495205de2ed
PMC4939744	Human Endometrial Fibroblasts Derived from Mesenchymal Progenitors Inherit Progesterone Resistance and Acquire an Inflammatory Phenotype in the Endometrial Niche in Endometriosis	supp_115.136010_biolreprod.115.136010	10.xls-Sheet1-Unnamed_0	Supplemental Data	948	96	1.73083	5.80133e-08	2.5146e-06	29b83dc2-3152-5308-92ca-290641171b19
PMC4939744	Human Endometrial Fibroblasts Derived from Mesenchymal Progenitors Inherit Progesterone Resistance and Acquire an Inflammatory Phenotype in the Endometrial Niche in Endometriosis	supp_115.136010_biolreprod.115.136010	10.xls-Sheet1-Unnamed_5	Supplemental Data	457	42	1.57082	0.00239696	0.0264038	4ee6ac33-263d-5b34-8700-87a98a237d13
PMC4971924	Transcriptome profiling reveals novel gene expression signatures and regulating transcription factors of TGF β‐induced epithelial‐to‐mesenchymal transition	CAM4-5-1962-s003.xlsx	Table_S2-Unnamed_1	Table S1. Top 50 genes differentially expressed in H358 and MCF10a cells. Table S2. Common differentially expressed EMT genes shared between H358 and MCF10a. Table S3. 58 core EMT‐related genes shared by our GES and Gupta's GES. Table S4. RT‐qPCR validation of 65 known EMT‐associated genes Click here for additional data file	526	53	1.7222	7.14902e-05	0.00140838	710f7966-5977-5bcd-9b4e-486475e5fe33
PMC5008832	CYR61 and TAZ Upregulation and Focal Epithelial to Mesenchymal Transition May Be Early Predictors of Barrett’s Esophagus Malignant Progression	pone.0161967.s011.xlsx	S3_Table-Unnamed_1	Differentially expression analysis filtered genes (Lods > 5).(XLSX) Click here for additional data file	782	79	1.72668	1.05508e-06	3.40693e-05	cece4e4c-a3b0-5059-a674-85d7524104c4
PMC5092539	A Single-Cell Transcriptome Atlas of the Human Pancreas	mmc3.xlsx	mesenchyme-Unnamed_0	can be found in Figures 1E and S1I, and the full list is in **Table S3** Table S3. Differential Gene Expression, Related to Figure 1Differentially expressed genes between each cell type compared to all others (across all donors)	667	63	1.61439	0.000101643	0.00190729	a1800565-9b94-51ab-ada0-eb4846facf99
PMC5135102	Persistent Morbillivirus Infection Leads to Altered Cortactin Distribution in Histiocytic Sarcoma Cells with Decreased Cellular Migration Capacity	pone.0167517.s002.docx	0-Gene_Symbol_Canis_familiaris	CDV-Ond infected DH82 cells. 6 out of 32 unique canine gene symbols (Table 4; **S2 Table**) 32 manually selected literature based genes, known to be involved in epithelial-mesenchymal transition (EMT) and mesenchymal-epithelial transition (MET).(DOCX) Click here for additional data file	31	8	4.41083	0.000313871	0.00498293	b361cc54-ddbf-51f3-a3c0-58b590ce2891
PMC5225525	MALAT1 promoted invasiveness of gastric adenocarcinoma	12885_2016_2988_MOESM1_ESM.xlsx	Sheet1-Supplementary_data_1_Cancer-related_target_gene_expression_by_MALAT1_silencing		770	87	1.93117	1.64968e-09	9.96217e-08	127a715c-6fa2-52bf-a568-f09f220c95b5
PMC5297123	Differential long noncoding RNA/mRNA expression profiling and functional network analysis during osteogenic differentiation of human bone marrow mesenchymal stem cells	13287_2017_485_MOESM1_ESM.xls	Differential_mRNAs-Additional_file_1_Table_S1_The_differentially_expressed_mRNAs_during_osteogenic_differentiation_of_BMSCs		1161	122	1.80071	5.70587e-11	4.57133e-09	f73b7fb5-5de8-541e-accb-438e3a6d5d9e
PMC5297123	Differential long noncoding RNA/mRNA expression profiling and functional network analysis during osteogenic differentiation of human bone marrow mesenchymal stem cells	13287_2017_485_MOESM5_ESM.xls	sheet-Unnamed_2		320	37	1.97626	5.64558e-05	0.00114952	34c3ff27-2c33-5a3f-a299-0f63115458d4
PMC5297123	Differential long noncoding RNA/mRNA expression profiling and functional network analysis during osteogenic differentiation of human bone marrow mesenchymal stem cells	13287_2017_485_MOESM7_ESM.xls	sheet-Additional_file_7_Table_S7_The_92_core_genes_enriched_by_signal-net_during_osteogenic_differentiation_of_BMSCs		92	14	2.60095	0.000876321	0.0116893	fa883c81-26f2-51ab-aa6e-fc62ff37d23d
PMC5318642	Evaluating Wharton's Jelly-Derived Mesenchymal Stem Cell's Survival, Migration, and Expression of Wound Repair Markers under Conditions of Ischemia-Like Stress	SCI2017-5259849.nxml	Gene_name	(b) Genes downregulated ≥ 2.0 in ischemic WJ-MSCs as compared to control WJ-MSCsCCL2CCL7CSF2CTSVCXCL1CXCL2HGFIL2ITGA6ITGB6MMP1PLGTNFWNT5A	6	3	8.54599	0.00349227	0.0355141	16746523-d67a-573c-9733-335d97344e2e
PMC5322933	Mesenchymal stromal cells (MSCs) induce ex vivo proliferation and erythroid commitment of cord blood haematopoietic stem cells (CB-CD34+ cells)	pone.0172430.s013.xls	HG_MSC_Single_Basal_vs_MSC_AD_B-Unnamed_1	from hallmark gene sets, canonical/KEGG pathways and oncogenic signatures are plotted. Please refer to **S4 Table** Gene Set Enrichment Analysis (GSEA) of MSCs-alone vs. co-cultured MSCs.The table reports Hellmark Genes, Oncogenic-linked Genes, Immune-linked Genes and Pathways enriched after co-culturing. Each category is reported in a different sheet, where the Gene Set Name, the number of Genes…	539	54	1.71237	7.11497e-05	0.00140284	bc476e46-3739-5bd4-930c-7f9fadfc3c0c
PMC5322933	Mesenchymal stromal cells (MSCs) induce ex vivo proliferation and erythroid commitment of cord blood haematopoietic stem cells (CB-CD34+ cells)	pone.0172430.s013.xls	Immune_MSC_Single_Basal_vs_MSC-Unnamed_1	from hallmark gene sets, canonical/KEGG pathways and oncogenic signatures are plotted. Please refer to **S4 Table** Gene Set Enrichment Analysis (GSEA) of MSCs-alone vs. co-cultured MSCs.The table reports Hellmark Genes, Oncogenic-linked Genes, Immune-linked Genes and Pathways enriched after co-culturing. Each category is reported in a different sheet, where the Gene Set Name, the number of Genes…	539	54	1.71237	7.11497e-05	0.00140284	9e5be576-644f-590b-9340-0baf0f4e5056
PMC5322933	Mesenchymal stromal cells (MSCs) induce ex vivo proliferation and erythroid commitment of cord blood haematopoietic stem cells (CB-CD34+ cells)	pone.0172430.s013.xls	Oncopath_MSC_Single_Basal_vs_MS-Unnamed_1	from hallmark gene sets, canonical/KEGG pathways and oncogenic signatures are plotted. Please refer to **S4 Table** Gene Set Enrichment Analysis (GSEA) of MSCs-alone vs. co-cultured MSCs.The table reports Hellmark Genes, Oncogenic-linked Genes, Immune-linked Genes and Pathways enriched after co-culturing. Each category is reported in a different sheet, where the Gene Set Name, the number of Genes…	539	54	1.71237	7.11497e-05	0.00140284	83946f9e-d30a-53a9-8917-00799fbba7c6
PMC5322933	Mesenchymal stromal cells (MSCs) induce ex vivo proliferation and erythroid commitment of cord blood haematopoietic stem cells (CB-CD34+ cells)	pone.0172430.s013.xls	Pathways_MSC_Single_Basal_vs_MS-Unnamed_1	from hallmark gene sets, canonical/KEGG pathways and oncogenic signatures are plotted. Please refer to **S4 Table** Gene Set Enrichment Analysis (GSEA) of MSCs-alone vs. co-cultured MSCs.The table reports Hellmark Genes, Oncogenic-linked Genes, Immune-linked Genes and Pathways enriched after co-culturing. Each category is reported in a different sheet, where the Gene Set Name, the number of Genes…	539	54	1.71237	7.11497e-05	0.00140284	fa2a8ba7-3f51-5861-9e30-daf21eb99de2
PMC5342558	Induction of epithelial-mesenchymal transition (EMT) by Beclin 1 knockdown via posttranscriptional upregulation of ZEB1 in thyroid cancer cells	oncotarget-07-70364-s002.xls	upregulated_mRNAs-Unnamed_0		201	25	2.12587	0.000291012	0.00466952	6622ec2d-493e-532b-8cf7-7640365102ca
PMC5342742	Promoter methylation of PCDH10 by HOTAIR regulates the progression of gastrointestinal stromal tumors	oncotarget-07-75307-s002.xlsx	set4_raw_data-Gene_Name	Nano String nCounter Gene Expression Assay to additional pathway analysis (Supplementary table S1 and **S2**)	770	87	1.93117	1.64968e-09	9.96217e-08	127a715c-6fa2-52bf-a568-f09f220c95b5
PMC5342742	Promoter methylation of PCDH10 by HOTAIR regulates the progression of gastrointestinal stromal tumors	oncotarget-07-75307-s002.xlsx	set4_normalization_data-Gene_Name	Nano String nCounter Gene Expression Assay to additional pathway analysis (Supplementary table S1 and **S2**)	770	87	1.93117	1.64968e-09	9.96217e-08	127a715c-6fa2-52bf-a568-f09f220c95b5
PMC5342742	Promoter methylation of PCDH10 by HOTAIR regulates the progression of gastrointestinal stromal tumors	oncotarget-07-75307-s002.xlsx	Supplementary_2-Supplementary_Table_2_Cancer-related_target_gene_expression_in_HOTAIR_overexpressing_GIST-T1_cell	Nano String nCounter Gene Expression Assay to additional pathway analysis (Supplementary table S1 and **S2**)	770	87	1.93117	1.64968e-09	9.96217e-08	127a715c-6fa2-52bf-a568-f09f220c95b5
PMC5347779	FGFR signaling maintains a drug persistent cell population following epithelial-mesenchymal transition	oncotarget-07-83424-s002.xlsx	Nanostring-Unnamed_5	several extracellular matrix proteins, integrins and EMT transcription factors (Figure 4A and 4B and **Supplementary Table S1**)	89	17	3.26476	1.32759e-05	0.000324796	45764cc3-b889-582c-8a3a-688edfdf9e06
PMC5347779	FGFR signaling maintains a drug persistent cell population following epithelial-mesenchymal transition	oncotarget-07-83424-s002.xlsx	Nanostring-Unnamed_21	several extracellular matrix proteins, integrins and EMT transcription factors (Figure 4A and 4B and **Supplementary Table S1**)	89	16	3.07272	5.15595e-05	0.00106237	da3666a6-616b-55c8-933b-4472f58e846f
PMC5354800	LSD1 mediates MYCN control of epithelial-mesenchymal transition through silencing of metastatic suppressor NDRG1 gene	oncotarget-08-3854-s002.xlsx	LSD1_vs_CRT-Gene_expression_levels_are_presented_as_log2_of_fold_change_of_siLSD1_treated_samples_respect_the_control		464	50	1.84181	2.04327e-05	0.000473591	18ad3701-2b9c-5eed-b4f4-27b80634045e
PMC5362953	LOXL2 drives epithelial-mesenchymal transition via activation of IRE1-XBP1 signalling pathway	srep44988-s2.xls	Hoja1-GEN	Supplementary Dataset 1	282	31	1.87891	0.000532628	0.00778324	fb75e689-fa50-575a-9156-ed00c2a8b1c9
PMC5366898	WT1 expression in breast cancer disrupts the epithelial/mesenchymal balance of tumour cells and correlates with the metabolic response to docetaxel	srep45255-s2.xls	TABLE_S1-GENE	Supplementary Dataset	366	37	1.72788	0.000810956	0.0109673	e99c2c8f-ab1c-5723-8cff-697b47c3a765
PMC5397247	Spheroid Coculture of Hematopoietic Stem/Progenitor Cells and Monolayer Expanded Mesenchymal Stem/Stromal Cells in Polydimethylsiloxane Microwells Modestly Improves In Vitro Hematopoietic Stem/Progenitor Cell Expansion	ten.tec.2016.0329.nxml	Table-Unnamed_0	In **Table 2** Fold Change in Gene Expression for Three-Dimensional Mesenchymal Stem/Stromal Cell Spheroids Compared with Two-Dimensional Adherent Mesenchymal Stem/Stromal Cell Cultures Reported in Previous Studies12,13 and in the Current StudyGene nameSecreted moleculesIL8TSG-6IL1BBMP2CXCL1SPP1GDF15IL11LIFSMOC1IL1AIGFBP1IGFBP5C1SBMP6TRAILPTHLHNMBAPODPLTPIL24IL6STC1NAMPTTGFB2TGFB3WNT5AHGFCXCL12Ce…	53	11	3.54739	0.000204174	0.00345525	39e820c6-cccf-58e0-a17c-64434545a137
PMC5453322	Identification of protein features encoded by alternative exons using Exon Ontology	supp_gr.212696.116_Supplemental_Table_S4.xlsx	81_ASEs-Gene_name	Supplemental Material	78	12	2.62954	0.00181871	0.0212515	eb39ed8e-4d3f-57cf-8358-e98d0ff9d562
PMC5488238	Bone morphogenetic protein and Notch signalling crosstalk in poor‐prognosis, mesenchymal‐subtype colorectal cancer	PATH-242-178-s013.xlsx	24H-Supplementary_Table_5B_Overlapping_differentially_expressed_genes_induced_by_200ng_ml_BMP2_or_200ng_ml_BMP4_after_24h_of_treatment	Supplementary Table 5B: Overlapping differentially expressed genes induced by 200ng/ml BMP2 or 200ng/ml BMP4 after 24h of treatment Click here for additional data file	489	53	1.8563	9.24987e-06	0.00023583	0c3bfbd3-86d6-5d55-a907-963ec93d26b8
PMC5488238	Bone morphogenetic protein and Notch signalling crosstalk in poor‐prognosis, mesenchymal‐subtype colorectal cancer	PATH-242-178-s013.xlsx	24H-Unnamed_2	Supplementary Table 5B: Overlapping differentially expressed genes induced by 200ng/ml BMP2 or 200ng/ml BMP4 after 24h of treatment Click here for additional data file	470	47	1.7165	0.000196656	0.00334196	e1097e27-4b98-5157-9df2-d57e44d241d1
PMC5501357	Interferon γ induced compositional changes in human bone marrow derived mesenchymal stem/stromal cells	12014_2017_Article_9161.nxml	Gene	of proteins displaying proteomic changes was analysed in Uniprot for expression of transmembrane regions [**3**] Membrane and secreted proteins with expression levels that were differentially influenced by IFN-γ treatmentANTXR1APCDD1LBTN3A3CACHD1CD274DSELHLA-CHLA-DPA1HLA-DRAHLA-EHLA-FICAM1LRRC32NPR3PCDHGA10PDCD1LG2PTPRKSECTM1TAPBPTAPBPLTLR3TMEM59VCAM1ABCC10ACSL5ASPHD2ATP9AB4GALT5BST2CD74CLIC2FADS…	63	10	2.71301	0.0033772	0.0346749	e304734d-548c-514e-8aa9-df9ccb28c780
PMC5513093	Loss of DIP2C in RKO cells stimulates changes in DNA methylation and epithelial-mesenchymal transition	12885_2017_3472_MOESM2_ESM.xlsx	S_Table_3-Supplementary_Table_3_Genes_with_4_fold_change_in_expression_in_DIP2C_knockout_cells	data for the expression of >4500 genes in each isogenic cell line. We identified 40**2** - Genes with ≥4 fold change in expression in DIP2C knockout cells. Table S4. - Gene set overlap results for differentially expressed genes (≥4-fold change up or down) investigated with GSEA MSigDB Hallmarks gene set. Table S5. - Functional annotation chart for differentially expressed genes (>4-fold change up…	675	58	1.46864	0.00192348	0.0221164	9c1227a7-0ba6-51de-9616-73644b575a05
PMC5543083	Unraveling a tumor type-specific regulatory core underlying E2F1-mediated epithelial-mesenchymal transition to predict receptor protein signatures	41467_2017_268_MOESM5_ESM.xlsx	Interactions_in_E2F1_map-Supplementary_Data_4_Interactions_between_nodes_in_E2F1_map_Cytoscape_version	(Supplementary Fig. 1) contains all respective family members and interactions among them (Supplementary Data **4**) Supplementary Data 4	595	58	1.66611	8.24162e-05	0.00159309	e3596d3e-d940-5669-af08-b8c8d0b866c8
PMC5543083	Unraveling a tumor type-specific regulatory core underlying E2F1-mediated epithelial-mesenchymal transition to predict receptor protein signatures	41467_2017_268_MOESM5_ESM.xlsx	Topological_properties_of_nodes-Supplementary_Data_4_Topological_properties_of_the_nodes_present_in_E2F1_interaction_map	(Supplementary Fig. 1) contains all respective family members and interactions among them (Supplementary Data **4**) Supplementary Data 4	756	66	1.49612	0.000589035	0.00843303	91cac14b-1a29-54ee-8714-21ce2d3ae5b1
PMC5574087	Term amniotic fluid: an unexploited reserve of mesenchymal stromal cells for reprogramming and potential cell therapy applications	13287_2017_582_MOESM5_ESM.xlsx	Enriched_in_CB-Endos-Symbol	between TAF-MSCs and a non-MSC (cord blood-derived endothelial cells (CB-Endo)) were performed (Additional file **5**) Showing the list of differentially expressed genes between TAF-MSCs and CB-Endo cells. TAF-MSCs term amniotic fluid-derived MSCs, CB-Endo cells cord blood-derived endothelial cells. (XLSX 4454 kb)	1842	267	2.48154	2.27438e-49	1.29715e-45	0c208121-49da-574f-a3dc-9486de108b59
PMC5620156	Epigenomic study identifies a novel mesenchyme homeobox2-GLI1 transcription axis involved in cancer drug resistance, overall survival and therapy prognosis in lung cancer patients	oncotarget-08-67056-s002.docx	0-DESCRIPTION	of 13 (FDR≤0.1) and/or 78 (FDR≤0.2) MEOX2 gene target promoters (Figure 2A; listed in **Supplementary Table I**)	75	11	2.50682	0.00406333	0.0399032	1f76eefc-73d1-5613-9c18-9eb59421a42c
PMC5630413	Development of mesenchymal subtype gene signature for clinical application in gastric cancer	oncotarget-08-66305-s002.xls	6502-Supplementary_Table_1_NanoString_nCounter_PanCancer_pathways	Digital Analyzer station with high resolution selected. Data were processed using nCounter PanCancer pathways (**Supplementary Table 1**)	770	87	1.93117	1.64968e-09	9.96217e-08	127a715c-6fa2-52bf-a568-f09f220c95b5
PMC5645935	Reprogramming of stromal fibroblasts by SNAI2 contributes to tumor desmoplasia and ovarian cancer progression	12943_2017_732_MOESM1_ESM.xlsx	Additional_file_1_Table_S4-Unnamed_1	and “Stromal_Signature (Resistance To Chemo)” selected from the MsigDB and published profiles (Additional file **1**) Listing of the Genes included in the signatures used from MSigDB or published literatures. Listing of the detailed genes included in the aforementioned signatures, all of which used for gene set enrichment analysis (GSEA) or single sample GSEA (ssGSEA) analysis were extracted eith…	109	16	2.50891	0.000582397	0.00836198	78b3977d-eeae-5450-b9e5-210c12fe4cb3
PMC5645935	Reprogramming of stromal fibroblasts by SNAI2 contributes to tumor desmoplasia and ovarian cancer progression	12943_2017_732_MOESM1_ESM.xlsx	Additional_file_1_Table_S1-Unnamed_60	and “Stromal_Signature (Resistance To Chemo)” selected from the MsigDB and published profiles (Additional file **1**) Listing of the Genes included in the signatures used from MSigDB or published literatures. Listing of the detailed genes included in the aforementioned signatures, all of which used for gene set enrichment analysis (GSEA) or single sample GSEA (ssGSEA) analysis were extracted eith…	20	6	5.12759	0.000751745	0.0102857	6b69b462-805c-534c-82f6-637d60418a5f
PMC5645935	Reprogramming of stromal fibroblasts by SNAI2 contributes to tumor desmoplasia and ovarian cancer progression	12943_2017_732_MOESM1_ESM.xlsx	Additional_file_1_Table_S5-Unnamed_1	and “Stromal_Signature (Resistance To Chemo)” selected from the MsigDB and published profiles (Additional file **1**) Listing of the Genes included in the signatures used from MSigDB or published literatures. Listing of the detailed genes included in the aforementioned signatures, all of which used for gene set enrichment analysis (GSEA) or single sample GSEA (ssGSEA) analysis were extracted eith…	284	30	1.81187	0.00117024	0.0148562	81351e9e-eae5-5e7c-9668-fc041ee04405
PMC5645935	Reprogramming of stromal fibroblasts by SNAI2 contributes to tumor desmoplasia and ovarian cancer progression	12943_2017_732_MOESM1_ESM.xlsx	Additional_file_1_Table_S1-Unnamed_26	and “Stromal_Signature (Resistance To Chemo)” selected from the MsigDB and published profiles (Additional file **1**) Listing of the Genes included in the signatures used from MSigDB or published literatures. Listing of the detailed genes included in the aforementioned signatures, all of which used for gene set enrichment analysis (GSEA) or single sample GSEA (ssGSEA) analysis were extracted eith…	30	7	3.98813	0.00142356	0.0173855	fb6718e5-5494-538b-9f88-d1ff50a8e366
PMC5645935	Reprogramming of stromal fibroblasts by SNAI2 contributes to tumor desmoplasia and ovarian cancer progression	12943_2017_732_MOESM1_ESM.xlsx	Additional_file_1_Table_S1-Unnamed_128	and “Stromal_Signature (Resistance To Chemo)” selected from the MsigDB and published profiles (Additional file **1**) Listing of the Genes included in the signatures used from MSigDB or published literatures. Listing of the detailed genes included in the aforementioned signatures, all of which used for gene set enrichment analysis (GSEA) or single sample GSEA (ssGSEA) analysis were extracted eith…	12	4	5.69733	0.00394414	0.0391193	d2f248a7-5e95-5cfc-b34a-976221efe249
PMC5645935	Reprogramming of stromal fibroblasts by SNAI2 contributes to tumor desmoplasia and ovarian cancer progression	12943_2017_732_MOESM1_ESM.xlsx	Additional_file_1_Table_S1-Unnamed_68	and “Stromal_Signature (Resistance To Chemo)” selected from the MsigDB and published profiles (Additional file **1**) Listing of the Genes included in the signatures used from MSigDB or published literatures. Listing of the detailed genes included in the aforementioned signatures, all of which used for gene set enrichment analysis (GSEA) or single sample GSEA (ssGSEA) analysis were extracted eith…	19	5	4.49789	0.00395797	0.0391193	c17fef35-27d7-565c-8a10-4de493cfce00
PMC5645935	Reprogramming of stromal fibroblasts by SNAI2 contributes to tumor desmoplasia and ovarian cancer progression	12943_2017_732_MOESM1_ESM.xlsx	Additional_file_1_Table_S6-Unnamed_1	and “Stromal_Signature (Resistance To Chemo)” selected from the MsigDB and published profiles (Additional file **1**) Listing of the Genes included in the signatures used from MSigDB or published literatures. Listing of the detailed genes included in the aforementioned signatures, all of which used for gene set enrichment analysis (GSEA) or single sample GSEA (ssGSEA) analysis were extracted eith…	77	11	2.44171	0.00498629	0.0470776	126c9247-c48f-5393-bf10-017cefa1930b
PMC5668280	EFHD2 promotes epithelial-to-mesenchymal transition and correlates with postsurgical recurrence of stage I lung adenocarcinoma	41598_2017_15186_MOESM2_ESM.xls	S3_Table-Unnamed_5	Total RNA was extracted with TRIzol reagent (Invitrogen). RT-PCR was performed using **1** Supplementary Tables	350	37	1.81725	0.000311757	0.00495683	1d11b0d4-ad80-50f0-ba3d-d54073d9511f
PMC5669907	Hic-5 regulates epithelial to mesenchymal transition in ovarian cancer cells in a TGFβ1-independent manner	oncotarget-08-82506-s002.xls	Feuil1-Supplemental_Table_1_Genes_differentially_expressed_in_SKOV3_cells_2_0_fold_p_0_05_following_Hic-5_knockdown	genes were upregulated and 1116 were downregulated in SKOV3 cells upon Hic-5 knockdown (see **Supplementary Table 1**)	1660	147	1.51357	7.97619e-08	3.35341e-06	1556b4d0-193f-5e2e-9731-9e56815e7571
PMC5696151	The IDO inhibitor 1-methyl tryptophan activates the aryl hydrocarbon receptor response in mesenchymal stromal cells	oncotarget-08-91914-s003.xlsx	Sheet1-Unnamed_0	pathways that were uniquely affected by R-MT, but not by TCDD treatment (715 genes, **Supplementarty Table 2**)	584	62	1.81456	3.36621e-06	9.60257e-05	5d43c5fb-95c8-5c52-b58a-df252dc112a8
PMC5696151	The IDO inhibitor 1-methyl tryptophan activates the aryl hydrocarbon receptor response in mesenchymal stromal cells	oncotarget-08-91914-s002.xlsx	Sheet1-Unnamed_0	TCDD-treated cells relative to controls. Among the up-regulated genes, we noted Cyp1a1 and Cyp1b1 (**Supplementary Table 1**)	314	33	1.79629	0.000789813	0.0107292	69398b88-5fee-5412-b921-787d9b298d54
PMC5716605	The human kidney capsule contains a functionally distinct mesenchymal stromal cell population	pone.0187118.s003.xlsx	Sheet1-Top_50_upregulated_genes_cMSC	types. The top 50 differentially expressed genes can be found in the supporting information (**S1 Table**) Top 50 differentially expressed genes between kPSCs and cMSCs.Quantile normalized average signals are shown. Abbreviations: kPSC: kidney cortex perivascular stromal cell, cMSC: kidney capsule-derived mesenchymal stromal cell.(XLSX) Click here for additional data file	46	9	3.34408	0.00119692	0.0151361	17e5d125-5db0-59dc-8bdf-458f2052d61d
PMC5719936	Comparative gene co-expression network analysis of epithelial to mesenchymal transition reveals lung cancer progression stages	12885_2017_3832_MOESM1_ESM.xlsx	Table_S3_EMT-dynamic_genes-ALDH3A2	levels and each EMT stage’s gene expression levels of 254 EMT-dynamic genes (Additional file **1**) Genes and gene co-expression modules by WGCNA in H358 EMT. Table S2. Genes and gene co-expression modules by WGCNA in A549 EMT. Table S3. 254 EMT-dynamic genes (XLSX 612 kb)	252	27	1.83128	0.00172928	0.0204027	261b80d4-5aca-5453-85cb-f37f63aeec6c
PMC5731856	cFLIP critically modulates apoptotic resistance in epithelial-to-mesenchymal transition	oncotarget-08-101072-s005.xlsx	Sheet1-GeneSymbols	3 cancer cell lines with 730 commonly upregulated genes and 37 commonly downregulated genes (**Supplementary Table 4**)	756	87	1.96693	6.66263e-10	4.32992e-08	4b6bb36c-5af0-5659-8cbd-7bada6548a79
PMC5739778	MicroRNA-34c acts as a bidirectional switch in the maturation of insulin-producing cells derived from mesenchymal stem cells	oncotarget-08-106844-s003.xlsx	Sheet1-Ortholog_of_target_gene	analyzed using TargetScan, miRDB, and miRBase (predicted target genes of miR-34c are listed in **Supplementary Table 2**)	741	92	2.12495	2.96703e-12	3.00122e-10	f4a787fe-493e-5a08-b1af-55943247d374
PMC5754365	Human mesenchymal stromal cells transplanted into mice stimulate renal tubular cells and enhance mitochondrial function	41467_2017_937_MOESM4_ESM.xls	Table_3-Unnamed_1	cisplatin alone and were not shared among the three comparisons (Fig. 2b; Supplementary Data **3**) Supplementary Data 3	382	37	1.65551	0.00174699	0.0205599	3e1c241f-b3a1-546f-ad21-4f6e521b126e
PMC5798892	ATF6 safeguards organelle homeostasis and cellular aging in human mesenchymal stem cells	41421_2017_3_MOESM7_ESM.xlsx	TM_KO_vs_WT-Supplementary_Table_S2-2_Up-_and_downregulated_genes_in_ATF6_cells_relative_to_ATF6_cells_in_the_presence_of_TM_early_passage	in early passage ATF6−/− hMSCs in comparison with WT hMSCs (Fig. 4a, Supplementary Table **S2**) Supplementary Table 2	708	83	2.00656	6.54421e-10	4.26245e-08	ee147a29-54ea-5435-8b8b-abac730b47a3
PMC5798892	ATF6 safeguards organelle homeostasis and cellular aging in human mesenchymal stem cells	41421_2017_3_MOESM8_ESM.xlsx	down-regulated-Supplementary_Table_S3_Up-_and_downregulated_genes_in_ATF6-_-_hMSCs_compared_to_ATF6_hMSCs_late_passage	clustered to architectural proteins of membrane organelle (Fig. 4b, Supplementary Figure S7A, Supplementary Table **S3**) Supplementary Table 3	396	51	2.20681	7.8548e-08	3.3068e-06	33157214-ad8f-524a-89ca-5ea15df4c3b9
PMC5798892	ATF6 safeguards organelle homeostasis and cellular aging in human mesenchymal stem cells	41421_2017_3_MOESM7_ESM.xlsx	Veh_KO_vs_WT-Supplementary_Table_S2-1_Up-_and_downregulated_genes_in_ATF6_cells_relative_to_ATF6_cells_in_the_presence_of_Vehicle_early_passage	in early passage ATF6−/− hMSCs in comparison with WT hMSCs (Fig. 4a, Supplementary Table **S2**) Supplementary Table 2	532	60	1.92767	6.83215e-07	2.30404e-05	7eccb4cb-5cea-556c-a78e-7440ccbba29e
PMC5832415	TGF-β uses a novel mode of receptor activation to phosphorylate SMAD1/5 and induce epithelial-to-mesenchymal transition	elife-31756-fig5-data1.xlsx	Sheet_1_Full_list-Unnamed_14	2378 pSMAD1/5 peaks and 2440 SMAD3 peaks identified in response to TGF-β after filtering (**Figure 5—source data 1**) ChIP-seq datasets	1295	122	1.6127	4.38372e-08	1.95257e-06	45f2ef13-413c-5a80-b138-d597040c478b
PMC5872662	Romidepsin Promotes Osteogenic and Adipocytic Differentiation of Human Mesenchymal Stem Cells through Inhibition of Histondeacetylase Activity	2379546.f2.xlsx	Sheet1-Unnamed_16	Supplementary Table 2: list of differentially expressed genes (2.0 FC, P corr < 0.05) in human mesenchymal stem cells (hMSCs) differentiated into adipocytes (day 7) in the presence of romidepsin compared to control hMSCs Click here for additional data file	1259	104	1.41189	0.000144171	0.00257027	6934df0d-12d1-5841-b07b-47ec65109d0e
PMC5918774	The presence of human mesenchymal stem cells of renal origin in amniotic fluid increases with gestational time	13287_2018_864_MOESM2_ESM.xls	sheet-hREPC_AND_AF_MSC_AND_UM51	To reveal the AF-MSC identity, the cells’ transcriptomes were compared to HREpCs, UM51 (urine-derived SIX**2**) Gene list of exclusive groups and shared genes of AF-MSCs, HREpCs and UM51. (XLS 995 kb)	398	47	2.0184	3.26611e-06	9.34227e-05	787d16e9-41e8-5e1d-aebf-3b58d73b1087
PMC5918774	The presence of human mesenchymal stem cells of renal origin in amniotic fluid increases with gestational time	13287_2018_864_MOESM2_ESM.xls	sheet-hREPC_AND_UM51	To reveal the AF-MSC identity, the cells’ transcriptomes were compared to HREpCs, UM51 (urine-derived SIX**2**) Gene list of exclusive groups and shared genes of AF-MSCs, HREpCs and UM51. (XLS 995 kb)	284	33	1.98604	0.000127579	0.002316	2eb3606c-92d4-5507-aa82-0d1c2a009270
PMC5918774	The presence of human mesenchymal stem cells of renal origin in amniotic fluid increases with gestational time	13287_2018_864_MOESM2_ESM.xls	sheet-hREPC_AND_fMSC_AND_UM51	To reveal the AF-MSC identity, the cells’ transcriptomes were compared to HREpCs, UM51 (urine-derived SIX**2**) Gene list of exclusive groups and shared genes of AF-MSCs, HREpCs and UM51. (XLS 995 kb)	217	25	1.96912	0.000913796	0.0121149	ec19b6ef-4bcb-5d39-88d7-238adf7e6eb1
PMC5918774	The presence of human mesenchymal stem cells of renal origin in amniotic fluid increases with gestational time	13287_2018_864_MOESM2_ESM.xls	sheet-UM51	To reveal the AF-MSC identity, the cells’ transcriptomes were compared to HREpCs, UM51 (urine-derived SIX**2**) Gene list of exclusive groups and shared genes of AF-MSCs, HREpCs and UM51. (XLS 995 kb)	330	32	1.6574	0.00340666	0.0349456	b2503951-c92b-55f3-a098-feed6b227692
PMC5998305	CD73 Regulates Stemness and Epithelial-Mesenchymal Transition in Ovarian Cancer-Initiating Cells	mmc2.xlsx	Table_S2-Unnamed_1	screening revealed the significant differential expression of 1,818 genes (p < 0.01; Figure 1B; **Table S2**) Table S2. Differentially Expressed Genes in OC- versus FTE-Derived Spheres	832	98	2.01566	1.21585e-11	1.09508e-09	975702e3-3001-5073-93cc-99d9dc7d6ded
PMC6008483	Molecular Characterization and Putative Pathogenic Pathways of Tuberous Sclerosis Complex–Associated Renal Cell Carcinoma	mmc3.xlsx	Table_3-Unnamed_5	Supplementary tables	770	87	1.93117	1.64968e-09	9.96217e-08	127a715c-6fa2-52bf-a568-f09f220c95b5
PMC6008483	Molecular Characterization and Putative Pathogenic Pathways of Tuberous Sclerosis Complex–Associated Renal Cell Carcinoma	mmc3.xlsx	Table_11-Supplementary_Table_11_mRNA_expression_and_fold_change_in_TSC-RCC_cases	Supplementary tables	770	87	1.93117	1.64968e-09	9.96217e-08	127a715c-6fa2-52bf-a568-f09f220c95b5
PMC6021240	Comprehensive identification of long noncoding RNAs in colorectal cancer	oncotarget-09-27605-s009.xlsx	Sheet1-JAGN1	relevant biological processes such as the epithelial-to-mesenchymal transition and angiogenesis (Supplementary Tables 8 and **9**)	55	11	3.4184	0.00028794	0.00462477	923fe2c1-afdc-558c-87c1-d3ec90d01749
PMC6021240	Comprehensive identification of long noncoding RNAs in colorectal cancer	oncotarget-09-27605-s009.xlsx	Sheet1-LIFR	relevant biological processes such as the epithelial-to-mesenchymal transition and angiogenesis (Supplementary Tables 8 and **9**)	39	9	3.9443	0.00033263	0.00522897	09b8b22b-be9e-5cf2-a87f-f07ce5441593
PMC6021240	Comprehensive identification of long noncoding RNAs in colorectal cancer	oncotarget-09-27605-s009.xlsx	Sheet1-DGAT1	relevant biological processes such as the epithelial-to-mesenchymal transition and angiogenesis (Supplementary Tables 8 and **9**)	68	11	2.76488	0.00184365	0.0213637	32af09e1-78b7-5e7a-b74d-5e1c21057978
PMC6021240	Comprehensive identification of long noncoding RNAs in colorectal cancer	oncotarget-09-27605-s009.xlsx	Sheet1-RETN	relevant biological processes such as the epithelial-to-mesenchymal transition and angiogenesis (Supplementary Tables 8 and **9**)	44	8	3.10763	0.00359316	0.0363432	e5e76256-5eb7-5450-b099-f669c5dbf81c
PMC6021240	Comprehensive identification of long noncoding RNAs in colorectal cancer	oncotarget-09-27605-s009.xlsx	Sheet1-FAM82A2	relevant biological processes such as the epithelial-to-mesenchymal transition and angiogenesis (Supplementary Tables 8 and **9**)	46	8	2.97252	0.00477217	0.0454549	5e378380-f864-5668-8640-fb2273fb39a6
PMC6021240	Comprehensive identification of long noncoding RNAs in colorectal cancer	oncotarget-09-27605-s009.xlsx	Sheet1-ANGPTL4	relevant biological processes such as the epithelial-to-mesenchymal transition and angiogenesis (Supplementary Tables 8 and **9**)	56	9	2.74693	0.00488202	0.0463436	ebb888f2-e1d1-5f98-a7a8-9229b73c4d9f
PMC6021240	Comprehensive identification of long noncoding RNAs in colorectal cancer	oncotarget-09-27605-s009.xlsx	Sheet1-ETFB	relevant biological processes such as the epithelial-to-mesenchymal transition and angiogenesis (Supplementary Tables 8 and **9**)	67	10	2.55104	0.00531117	0.0494202	72a52626-e5fb-5d8b-b872-67c6393e7a34
PMC6097446	Aberrantly expressed messenger RNAs and long noncoding RNAs in degenerative nucleus pulposus cells co-cultured with adipose-derived mesenchymal stem cells	13075_2018_1677_MOESM7_ESM.xlsx	Differentially_expressed_genes-Gene_Symbol	metallothionein 1F (MT1F) and ectonucleotide pyrophosphatase 1 (ENPP1) with their fold changes were 106, **7** Full list of differentially expressed mRNAs and lncRNAs. (XLSX 1394 kb)	1615	196	2.07818	7.66671e-25	4.55761e-22	90fb583e-8425-56ef-a676-b25ec2d3a091
PMC6097446	Aberrantly expressed messenger RNAs and long noncoding RNAs in degenerative nucleus pulposus cells co-cultured with adipose-derived mesenchymal stem cells	13075_2018_1677_MOESM7_ESM.xlsx	gene-list-Gene_Symbol	metallothionein 1F (MT1F) and ectonucleotide pyrophosphatase 1 (ENPP1) with their fold changes were 106, **7** Full list of differentially expressed mRNAs and lncRNAs. (XLSX 1394 kb)	1615	196	2.07818	7.66671e-25	4.55761e-22	90fb583e-8425-56ef-a676-b25ec2d3a091
PMC6097446	Aberrantly expressed messenger RNAs and long noncoding RNAs in degenerative nucleus pulposus cells co-cultured with adipose-derived mesenchymal stem cells	13075_2018_1677_MOESM9_ESM.docx	0-Gene_symbol	and Pathway enrichment analysis, a gene interaction network was constructed (Fig. 7; Additional file **9**) Top 20 most significantly regulated genes in signal-net. (DOCX 15 kb)	20	7	5.98219	9.06229e-05	0.00172895	3a9c5e59-07ee-5cca-bb05-24bbfe859fbf
PMC6097446	Aberrantly expressed messenger RNAs and long noncoding RNAs in degenerative nucleus pulposus cells co-cultured with adipose-derived mesenchymal stem cells	13075_2018_1677_MOESM7_ESM.xlsx	Differentially_expressed_ncRNAs-intersense	metallothionein 1F (MT1F) and ectonucleotide pyrophosphatase 1 (ENPP1) with their fold changes were 106, **7** Full list of differentially expressed mRNAs and lncRNAs. (XLSX 1394 kb)	147	21	2.44171	0.000128739	0.00233549	a08f16d0-d036-5656-81c5-060faeedd76f
PMC6102276	Intrathecal delivery of human ESC-derived mesenchymal stem cell spheres promotes recovery of a primate multiple sclerosis model	41420_2018_91_MOESM3_ESM.xlsx	DOWN_gene-gene	when comparing EMSCsp-AC/d2-CSF/d7 with EMSC, we obtained 1879 upregulated and 1456 downregulated genes (Table **S1**) Table S1	1253	124	1.7037	1.29691e-09	8.0026e-08	83ac1f8b-8243-5475-8dd7-13bc5f82e781
PMC6102276	Intrathecal delivery of human ESC-derived mesenchymal stem cell spheres promotes recovery of a primate multiple sclerosis model	41420_2018_91_MOESM3_ESM.xlsx	UP_gene-gene	when comparing EMSCsp-AC/d2-CSF/d7 with EMSC, we obtained 1879 upregulated and 1456 downregulated genes (Table **S1**) Table S1	1570	131	1.43898	6.6782e-06	0.000176677	9a5ad2a0-0ae9-511a-a617-f5e6254f4786
PMC6105627	Effects of bone marrow‐derived mesenchymal stromal cells on gene expression in human alveolar type II cells exposed to TNF‐α, IL‐1β, and IFN‐γ	PHY2-6-e13831-s001.xlsx	Supplementary_Table_1-Unnamed_1	were up‐ and down regulated, respectively, in ATII cells in response to CytoMix (Table **S1**) Table S1. Genes differentially expressed by ATII cells that were exposed to CytoMix alone versus control. Table S2. MSigDB Hallmark gene sets and canonical pathway gene sets upregulated in ATII cells that were exposed to CytoMix alone versus. control. Table S3. MSigDB Hallmark gene sets and canonical pa…	852	83	1.66506	2.37019e-06	7.03757e-05	ec8671a3-97b2-5b70-827d-041789e8bcd3
PMC6145927	Differentiation-state plasticity is a targetable resistance mechanism in basal-like breast cancer	41467_2018_5729_MOESM6_ESM.xlsx	Breast_Phenotype_Genesets-CHARAFE_BREAST_CANCER_LUMINAL_VS_MESENCHYMAL_DN	selection occurs in the drug-induced differentiation-state enriched DTPs. We performed whole exome sequencing on HCC11**4** Supplementary Data 3	456	41	1.53678	0.00395331	0.0391193	4d796ee9-2c2f-5097-a62a-bb6356426568
PMC6160778	Mesenchymal glioblastoma constitutes a major ceRNA signature in the TGF-β pathway	thnov08p4733s5.xlsx	Sheet2-Supplementary_Table_4_The_differential_genes_10_connectivity_in_the_ceRNA_subnetworks	Supplementary table 4 Click here for additional data file	1510	178	2.01482	5.99621e-21	2.24728e-18	22b84140-6cbb-5c88-a0ff-ade5305b9868
PMC6160778	Mesenchymal glioblastoma constitutes a major ceRNA signature in the TGF-β pathway	thnov08p4733s8.xlsx	Sheet2-Supplementary_Table_7_The_high_confidence_ceRNA_network	Supplementary table 7 Click here for additional data file	789	114	2.46956	6.37803e-20	2.09773e-17	2d88221e-d484-5ed1-858c-10f6159dde5f
PMC6167950	RNA-seq of macrophages of amoeboid or mesenchymal migratory phenotype due to specific structure of environment	sdata2018198-s3.xls	Sheet1-symbol	Supplementary Table 1	2224	160	1.23019	0.00158592	0.0190774	b1450be7-a5cb-5aa8-a05b-ce66218b7ac1
PMC6167950	RNA-seq of macrophages of amoeboid or mesenchymal migratory phenotype due to specific structure of environment	sdata2018198-s3.xls	Sheet1-geneID	Supplementary Table 1	2223	160	1.23019	0.00158592	0.0190774	e0025ca6-846d-5be8-b708-becc85ff9296
PMC6176871	Structural Remodeling of the Human Colonic Mesenchyme in Inflammatory Bowel Disease	mmc5.xlsx	MF-Unnamed_0	is consistent with our preliminary data using the C1 Platform (Figures S1A and S1D; **Table S5**) Table S5. Cluster Marker Genes in UC, C1 Data, Related to Figure 2	2318	218	1.60744	3.34041e-14	4.72907e-12	336d4179-2f87-59f8-8d22-3c62029d9035
PMC6176871	Structural Remodeling of the Human Colonic Mesenchyme in Inflammatory Bowel Disease	mmc5.xlsx	MF-feature_symbol	is consistent with our preliminary data using the C1 Platform (Figures S1A and S1D; **Table S5**) Table S5. Cluster Marker Genes in UC, C1 Data, Related to Figure 2	2319	217	1.60007	6.33672e-14	8.55126e-12	a8d85a17-11cc-544e-9784-98722e44ca6c
PMC6176871	Structural Remodeling of the Human Colonic Mesenchyme in Inflammatory Bowel Disease	mmc5.xlsx	S1-feature_symbol	is consistent with our preliminary data using the C1 Platform (Figures S1A and S1D; **Table S5**) Table S5. Cluster Marker Genes in UC, C1 Data, Related to Figure 2	828	77	1.58947	2.88471e-05	0.000639853	24f43098-308a-5a42-85bc-a707b9d45e24
PMC6176871	Structural Remodeling of the Human Colonic Mesenchyme in Inflammatory Bowel Disease	mmc5.xlsx	S1-Unnamed_0	is consistent with our preliminary data using the C1 Platform (Figures S1A and S1D; **Table S5**) Table S5. Cluster Marker Genes in UC, C1 Data, Related to Figure 2	830	77	1.58564	3.13071e-05	0.000687922	65f31d07-d975-587e-9be1-a5cdbdf624cf
PMC6176871	Structural Remodeling of the Human Colonic Mesenchyme in Inflammatory Bowel Disease	mmc5.xlsx	S4-Unnamed_0	is consistent with our preliminary data using the C1 Platform (Figures S1A and S1D; **Table S5**) Table S5. Cluster Marker Genes in UC, C1 Data, Related to Figure 2	2254	170	1.2891	0.000115144	0.002124	a612a1e4-6d6b-5dcb-9988-07703eb38782
PMC6176871	Structural Remodeling of the Human Colonic Mesenchyme in Inflammatory Bowel Disease	mmc5.xlsx	S4-feature_symbol	is consistent with our preliminary data using the C1 Platform (Figures S1A and S1D; **Table S5**) Table S5. Cluster Marker Genes in UC, C1 Data, Related to Figure 2	2256	169	1.28038	0.000170958	0.0029719	50d2abf9-2422-5d3b-91cd-b42da82d80fa
PMC6176871	Structural Remodeling of the Human Colonic Mesenchyme in Inflammatory Bowel Disease	mmc2.xlsx	S1-Unnamed_0	contractile genes and showed dissimilar transcriptional profiles and ontology enrichment (Figures S1C and S1E; **Table S2**) Table S2. Cluster Marker Genes in Health, C1 Data, Related to Figure 1	1566	118	1.2879	0.00168325	0.0199828	32ff8e77-5367-5c5d-b675-600d6c95e5f1
PMC6176871	Structural Remodeling of the Human Colonic Mesenchyme in Inflammatory Bowel Disease	mmc2.xlsx	S1-feature_symbol	contractile genes and showed dissimilar transcriptional profiles and ontology enrichment (Figures S1C and S1E; **Table S2**) Table S2. Cluster Marker Genes in Health, C1 Data, Related to Figure 1	1568	118	1.28708	0.00172065	0.0203267	27060e46-c8e0-5490-af82-9d5c52cc442b
PMC6176871	Structural Remodeling of the Human Colonic Mesenchyme in Inflammatory Bowel Disease	mmc5.xlsx	S3-feature_symbol	is consistent with our preliminary data using the C1 Platform (Figures S1A and S1D; **Table S5**) Table S5. Cluster Marker Genes in UC, C1 Data, Related to Figure 2	1327	102	1.31477	0.00191017	0.0220194	ef74cb14-0b3f-59da-b482-782f66598a60
PMC6176871	Structural Remodeling of the Human Colonic Mesenchyme in Inflammatory Bowel Disease	mmc5.xlsx	S3-Unnamed_0	is consistent with our preliminary data using the C1 Platform (Figures S1A and S1D; **Table S5**) Table S5. Cluster Marker Genes in UC, C1 Data, Related to Figure 2	1326	101	1.30188	0.00272259	0.0292629	a69d055e-8124-52a8-b18b-1886d6ab9828
PMC6202803	Human decidua basalis mesenchymal stem/stromal cells protect endothelial cell functions from oxidative stress induced by hydrogen peroxide and monocytes	13287_2018_Article_1021.nxml	Gene_Symbol	as infiltration as compared to untreated endothelial cells (Tables 2, 3, 4, 5, and **6**) DBMSCs effects on genes involved in endothelial cell (EC) biology. THUVEC (HUVEC were cultured with 100 μM H2O2 for 48 h). TDBMSC (HUVEC were cultured with DBMSC and 100 μM H2O2 for 48 h)ANGPT1AGTR1ALOX5ANXA5APOEBCL2L1CALCACCL2CX3CL1EDN2FASLGFN1ICAM1IL3IL7KLK3MMP1NOS3NPPBOCLNPDGFRAPGFPLATPLAUSELLSOD1TGFB1ENG	6	3	8.54599	0.00349227	0.0355141	ec782301-ffd3-5a9a-903d-a2a50fbf0940
PMC6211324	Lymphoid Enhancer Factor 1 Contributes to Hepatocellular Carcinoma Progression Through Transcriptional Regulation of Epithelial‐Mesenchymal Transition Regulators and Stemness Genes	HEP4-2-1392-s004.xlsx	Sheet1-Gene_Symbol	Click here for additional data file	113	21	3.17639	2.1035e-06	6.32545e-05	e20ad557-233b-56df-9c67-1a9ba3785730
PMC6211324	Lymphoid Enhancer Factor 1 Contributes to Hepatocellular Carcinoma Progression Through Transcriptional Regulation of Epithelial‐Mesenchymal Transition Regulators and Stemness Genes	HEP4-2-1392-s003.xlsx	Table_S3-Unnamed_2	Click here for additional data file	114	21	3.14852	2.43856e-06	7.21097e-05	eaaa8b62-8bb8-502f-a995-e980a06434bb
PMC6211324	Lymphoid Enhancer Factor 1 Contributes to Hepatocellular Carcinoma Progression Through Transcriptional Regulation of Epithelial‐Mesenchymal Transition Regulators and Stemness Genes	HEP4-2-1392-s002.xlsx	Table_S2-Unnamed_2	Click here for additional data file	114	21	3.14852	2.43856e-06	7.21097e-05	eaaa8b62-8bb8-502f-a995-e980a06434bb
PMC6224081	Substrate-independent immunomodulatory characteristics of mesenchymal stem cells in three-dimensional culture	pone.0206811.s005.xlsx	chitosan-3D-UP-KEGG-Unnamed_5	Software 3.1 (Santa Clara) using the default settings. Raw data (S1, S2, S3 and **S4**) Result analysis of all data.(XLSX) Click here for additional data file	1123	106	1.61331	3.80119e-07	1.36724e-05	981c49e2-6e04-5553-93d8-ee8208f6598d
PMC6224081	Substrate-independent immunomodulatory characteristics of mesenchymal stem cells in three-dimensional culture	pone.0206811.s005.xlsx	chitosan-3D-UP-KEGG-Unnamed_2	Software 3.1 (Santa Clara) using the default settings. Raw data (S1, S2, S3 and **S4**) Result analysis of all data.(XLSX) Click here for additional data file	1128	106	1.60616	4.70645e-07	1.65341e-05	8d2c60ba-6eb2-5b02-8192-8194bc5fb693
PMC6224081	Substrate-independent immunomodulatory characteristics of mesenchymal stem cells in three-dimensional culture	pone.0206811.s005.xlsx	collagen-3D-UP-KEGG-Unnamed_5	Software 3.1 (Santa Clara) using the default settings. Raw data (S1, S2, S3 and **S4**) Result analysis of all data.(XLSX) Click here for additional data file	1084	99	1.56098	4.11724e-06	0.000114975	08d3fae3-a156-57c3-8de5-5eebcf01d37e
PMC6224081	Substrate-independent immunomodulatory characteristics of mesenchymal stem cells in three-dimensional culture	pone.0206811.s005.xlsx	collagen-3D-UP-KEGG-Unnamed_2	Software 3.1 (Santa Clara) using the default settings. Raw data (S1, S2, S3 and **S4**) Result analysis of all data.(XLSX) Click here for additional data file	1090	99	1.55239	5.20741e-06	0.000141756	28d1c9e5-1d48-52b3-9f18-74b3c2be6ebe
PMC6224081	Substrate-independent immunomodulatory characteristics of mesenchymal stem cells in three-dimensional culture	pone.0206811.s005.xlsx	Plga-3D-UP-KEGG-Unnamed_2	Software 3.1 (Santa Clara) using the default settings. Raw data (S1, S2, S3 and **S4**) Result analysis of all data.(XLSX) Click here for additional data file	990	89	1.53655	2.41096e-05	0.000547449	89e69f52-0fbb-5532-ab91-d75837df0e4a
PMC6224081	Substrate-independent immunomodulatory characteristics of mesenchymal stem cells in three-dimensional culture	pone.0206811.s005.xlsx	Plga-3D-UP-KEGG-Unnamed_5	Software 3.1 (Santa Clara) using the default settings. Raw data (S1, S2, S3 and **S4**) Result analysis of all data.(XLSX) Click here for additional data file	984	86	1.49381	9.03443e-05	0.00172528	9311baf0-0df1-5b32-8cef-bb886cc22b7c
PMC6224081	Substrate-independent immunomodulatory characteristics of mesenchymal stem cells in three-dimensional culture	pone.0206811.s005.xlsx	Common_3D_UP_KEGG-Unnamed_5	Software 3.1 (Santa Clara) using the default settings. Raw data (S1, S2, S3 and **S4**) Result analysis of all data.(XLSX) Click here for additional data file	870	76	1.49309	0.000240359	0.00396854	0ebcc4d7-76fa-525e-ae9e-c4657908cdc7
PMC6224081	Substrate-independent immunomodulatory characteristics of mesenchymal stem cells in three-dimensional culture	pone.0206811.s005.xlsx	Common_3D_UP_KEGG-Unnamed_2	Software 3.1 (Santa Clara) using the default settings. Raw data (S1, S2, S3 and **S4**) Result analysis of all data.(XLSX) Click here for additional data file	874	76	1.48626	0.000276074	0.00446464	82662a3e-9876-506c-ac9a-1072bd08dc7e
PMC6250721	Longitudinal single-cell RNA sequencing of patient-derived primary cells reveals drug-induced infidelity in stem cell hierarchy	41467_2018_7261_MOESM7_ESM.xlsx	PCA_top_genes-PC4	differentiation while PC2 associated with epithelial-to-mesenchymal transition (EMT) (Supplementary Figure 6a-d and Supplementary Data **3**) Supplementary Data 3	1885	149	1.35104	3.8232e-05	0.000817837	d686d67c-2391-5fb8-b99e-d6441f81867b
PMC6250721	Longitudinal single-cell RNA sequencing of patient-derived primary cells reveals drug-induced infidelity in stem cell hierarchy	41467_2018_7261_MOESM9_ESM.csv	gene	examine the chromatin status of mesenchymal genes in cisplatin-resistant and metastasis cells (Supplementary Data **5**) Supplementary Data 5	287	32	1.90573	0.000339599	0.00532425	4b6d8e7c-a4dd-50a7-a580-d6273eb67291
PMC6250721	Longitudinal single-cell RNA sequencing of patient-derived primary cells reveals drug-induced infidelity in stem cell hierarchy	41467_2018_7261_MOESM7_ESM.xlsx	PCA_top_genes-PC2	differentiation while PC2 associated with epithelial-to-mesenchymal transition (EMT) (Supplementary Figure 6a-d and Supplementary Data **3**) Supplementary Data 3	1887	135	1.2228	0.00495741	0.0468948	3ee3ef42-8f5d-555b-8412-085e57378f7d
PMC6257964	EBV-miR-BART8-3p induces epithelial-mesenchymal transition and promotes metastasis of nasopharyngeal carcinoma cells through activating NF-κB and Erk1/2 pathways	13046_2018_953_MOESM1_ESM.xlsx	Table_S5-Unnamed_1	associated with NPC pathogenesis. The clinical data of NPC cases are showed in Table **1** Table S1. miRNAs differentialy expressed in NPC versus control. Table S2. The top 20 most significantly up-regulated microRNAs in NPC. Table S3. Module assignment for microRNAs. Table S4. Enrichement of differentially expressed microRNAs in the coexpressed microRNA module. Table S5. Differerentially express…	2279	229	1.72198	1.84221e-18	4.93603e-16	7621bb09-b812-550e-802f-8cf44d9abe84
PMC6257964	EBV-miR-BART8-3p induces epithelial-mesenchymal transition and promotes metastasis of nasopharyngeal carcinoma cells through activating NF-κB and Erk1/2 pathways	13046_2018_953_MOESM1_ESM.xlsx	Table_S5-Table_S5_Differerentially_expressed_genes_in_NPC_versus_control_NNPC	associated with NPC pathogenesis. The clinical data of NPC cases are showed in Table **1** Table S1. miRNAs differentialy expressed in NPC versus control. Table S2. The top 20 most significantly up-regulated microRNAs in NPC. Table S3. Module assignment for microRNAs. Table S4. Enrichement of differentially expressed microRNAs in the coexpressed microRNA module. Table S5. Differerentially express…	2260	226	1.7092	8.27099e-18	2.02776e-15	34b773fb-ce97-50ae-b149-1b68e3336e90
PMC6260689	The genomics of desmoplastic small round cell tumor reveals the deregulation of genes related to DNA damage response, epithelial–mesenchymal transition, and immune response	40880_2018_339_MOESM2_ESM.xlsx	Table_S7-Unnamed_6	Figure S1, we identified 137 somatic mutations affecting 135 genes (listed in Additional file **2**) Additional file 2. Table S1. List of somatic mutations identified in each patient. Table S2. List, information and literature supply for genes mutated or copy number altered described in the main text as belonging to DDR or MErT/EMT categories. Table S3. List of somatic copy number aberrations ide…	990	91	1.57426	7.53101e-06	0.000196511	86447abf-4219-5921-8387-6e393ba044a3
PMC6288489	The Transcriptome of Human Endometrial Mesenchymal Stem Cells Under TGFβR Inhibition Reveals Improved Potential for Cell-Based Therapies	Data_Sheet_1.docx	0-EnsemblGeneID	detected in the P6 eMSCs (NCBI account). There were 1206 DEGs (609 upregulated/Supplementary Table **S1**) Click here for additional data file	522	53	1.73539	5.85294e-05	0.00118712	c54b5245-26ea-5972-b6af-ed68cea054e8
PMC6288489	The Transcriptome of Human Endometrial Mesenchymal Stem Cells Under TGFβR Inhibition Reveals Improved Potential for Cell-Based Therapies	Data_Sheet_1.docx	0-Gene	detected in the P6 eMSCs (NCBI account). There were 1206 DEGs (609 upregulated/Supplementary Table **S1**) Click here for additional data file	522	51	1.66991	0.00020872	0.00352032	7f411265-cedf-57ca-a432-7b01d3b62b00
PMC6291168	Downregulation of ERG and FLI1 expression in endothelial cells triggers endothelial-to-mesenchymal transition	pgen.1007826.s015.xlsx	Sheet1-Unnamed_3	minor patterns (S3 Fig). The list of genes in each pattern is also shown (**S1 Table**) List of genes in each regulation pattern in S3 Fig.(XLSX) Click here for additional data file	1175	138	2.0074	5.04995e-16	9.48871e-14	ca4f2498-c7ae-5c43-b500-e3ca6b85d40e
PMC6291168	Downregulation of ERG and FLI1 expression in endothelial cells triggers endothelial-to-mesenchymal transition	pgen.1007826.s016.xlsx	Sheet1-PDE2A	siERG or siFLI1 alone. Finally, 293 candidate genes were commonly listed (S7A Fig and **S2 Table**) List of candidate coding genes responsible for regulating EndMT.(XLSX) Click here for additional data file	29	11	6.48317	3.37978e-07	1.22995e-05	87f7d925-8fcc-5887-ba27-773b5845580d
PMC6291168	Downregulation of ERG and FLI1 expression in endothelial cells triggers endothelial-to-mesenchymal transition	pgen.1007826.s016.xlsx	Sheet1-JAG2	siERG or siFLI1 alone. Finally, 293 candidate genes were commonly listed (S7A Fig and **S2 Table**) List of candidate coding genes responsible for regulating EndMT.(XLSX) Click here for additional data file	29	9	5.30441	2.66737e-05	0.000597658	137ebdb0-f53d-589e-894a-5ad6892d8ce6
PMC6291168	Downregulation of ERG and FLI1 expression in endothelial cells triggers endothelial-to-mesenchymal transition	pgen.1007826.s016.xlsx	Sheet1-MEF2C	siERG or siFLI1 alone. Finally, 293 candidate genes were commonly listed (S7A Fig and **S2 Table**) List of candidate coding genes responsible for regulating EndMT.(XLSX) Click here for additional data file	29	9	5.30441	2.66737e-05	0.000597658	8c41d506-bc24-5d70-a2f2-b86f02c9b01e
PMC6291168	Downregulation of ERG and FLI1 expression in endothelial cells triggers endothelial-to-mesenchymal transition	pgen.1007826.s016.xlsx	Sheet1-ACAA2	siERG or siFLI1 alone. Finally, 293 candidate genes were commonly listed (S7A Fig and **S2 Table**) List of candidate coding genes responsible for regulating EndMT.(XLSX) Click here for additional data file	28	8	4.88342	0.000144634	0.00257533	1edd0453-4e90-5088-a3be-846ffe56ccf7
PMC6294687	Derivation and characterization of putative craniofacial mesenchymal progenitor cells from human induced pluripotent stem cells	NIHMS997268-supplement-9.xlsx	all_groups-Unnamed_2		1223	134	1.87271	3.07962e-13	3.70973e-11	bcfe23c0-1cc4-5767-a9d1-0eb47ce26564
PMC6294687	Derivation and characterization of putative craniofacial mesenchymal progenitor cells from human induced pluripotent stem cells	NIHMS997268-supplement-9.xlsx	no_BMSC-Unnamed_2		1010	109	1.84458	1.74382e-10	1.2752e-08	8d699505-5dff-5b91-97a1-bee1c533e73e
PMC6330472	Comparative analysis of mesenchymal stem cells derived from amniotic membrane, umbilical cord, and chorionic plate under serum-free condition	13287_2018_1104_MOESM3_ESM.txt	GeneName	further understand the functional differences among the three types of MSCs, 142, 115, and 2**3** Table S2. Differentially expressed gene. (TXT 109 kb)	742	75	1.72763	1.97317e-06	5.97545e-05	6ab21291-23fb-55b5-846c-af05d9f4347e
PMC6334457	OCT4 maintains self-renewal and reverses senescence in human hair follicle mesenchymal stem cells through the downregulation of p21 by DNA methyltransferases	13287_2018_1120_MOESM2_ESM.xlsx	上调gene-Gene	self-renewal and reverses senescence in hHFMSCs, next-generation sequencing (NGS) was utilized. A total of 56,**2** The details of the DEGs. (XLSX 161 kb)	2042	203	1.69999	1.31426e-15	2.33035e-13	f5e5353d-d4f5-5dd9-bbb3-0a5690ad1af2
PMC6344081	PLZF targets developmental enhancers for activation during osteogenic differentiation of human mesenchymal stem cells	elife-40364-supp8.xlsx	PLZF-kd_2d_Diff_Vs_Ctrl_2d-diff-Symbol	genes that were normally induced in osteoblast committed progenitor cells (Figure 3D and E, **Supplementary file 8**) Differentially expressed transcripts/genes from RNA seq-(PLZF-kd 2 days diff-Vs Control Si 2 days diff, OR 2 days differentiation Vs naive)	1061	132	2.12844	2.2006e-17	5.05219e-15	1619a58d-73ba-5f11-990a-72e4de14ab30
PMC6344081	PLZF targets developmental enhancers for activation during osteogenic differentiation of human mesenchymal stem cells	elife-40364-supp5.xlsx	PLZF_peaks_H3K27Ac_unchanged-Unnamed_10	approximately 18% of the 2,282 genomic sites binding PLZF, gained H3K27ac (≥ 2 fold, **Supplementary file 5**) PLZF peaks-Expression of nearest transcript and H3K27ac changes	844	110	2.22763	6.26685e-16	1.16297e-13	771a3be1-6556-5ec5-b5b1-d5c26a0ba7a5
PMC6344081	PLZF targets developmental enhancers for activation during osteogenic differentiation of human mesenchymal stem cells	elife-40364-supp8.xlsx	Ctrl-Si-diff_expressed-Down-Symbol	genes that were normally induced in osteoblast committed progenitor cells (Figure 3D and E, **Supplementary file 8**) Differentially expressed transcripts/genes from RNA seq-(PLZF-kd 2 days diff-Vs Control Si 2 days diff, OR 2 days differentiation Vs naive)	932	114	2.0929	1.51858e-14	2.25997e-12	709ae474-dc21-522f-9fad-6f8a39ee442f
PMC6344081	PLZF targets developmental enhancers for activation during osteogenic differentiation of human mesenchymal stem cells	elife-40364-supp8.xlsx	PLZF-Si-diff-expressed-gen-Down-Symbol	genes that were normally induced in osteoblast committed progenitor cells (Figure 3D and E, **Supplementary file 8**) Differentially expressed transcripts/genes from RNA seq-(PLZF-kd 2 days diff-Vs Control Si 2 days diff, OR 2 days differentiation Vs naive)	594	81	2.33072	5.55474e-13	6.38796e-11	a1ecc285-b4df-5a01-b81a-dff1b4010dc6
PMC6344081	PLZF targets developmental enhancers for activation during osteogenic differentiation of human mesenchymal stem cells	elife-40364-supp1.xlsx	Genes-differentially-regulated-Symbol	2003. The time point chosen for our analyses was based on prior microarray analyses (**Supplementary file 1**) Microarray-Genes-differentially regulated (Osteogenic differentiation induced Vs Naive)	795	95	2.04501	1.15143e-11	1.04188e-09	f2e36d31-ad17-5980-83d0-8b171d9e641c
PMC6344081	PLZF targets developmental enhancers for activation during osteogenic differentiation of human mesenchymal stem cells	elife-40364-supp1.xlsx	10days_Up_1_5fold-Symbol	2003. The time point chosen for our analyses was based on prior microarray analyses (**Supplementary file 1**) Microarray-Genes-differentially regulated (Osteogenic differentiation induced Vs Naive)	377	56	2.54561	8.64005e-11	6.70057e-09	3f8ca267-476b-5590-b702-5c0da8dfe657
PMC6344081	PLZF targets developmental enhancers for activation during osteogenic differentiation of human mesenchymal stem cells	elife-40364-supp8.xlsx	Ctrl-Si_diff_expressed_genes_up-Symbol	genes that were normally induced in osteoblast committed progenitor cells (Figure 3D and E, **Supplementary file 8**) Differentially expressed transcripts/genes from RNA seq-(PLZF-kd 2 days diff-Vs Control Si 2 days diff, OR 2 days differentiation Vs naive)	753	89	2.02017	1.04534e-10	7.98358e-09	1a7f137c-d63c-5256-8367-9c7db0fa2dae
PMC6344081	PLZF targets developmental enhancers for activation during osteogenic differentiation of human mesenchymal stem cells	elife-40364-supp8.xlsx	PLZF-Si-diff-expressed-genes-Up-Symbol	genes that were normally induced in osteoblast committed progenitor cells (Figure 3D and E, **Supplementary file 8**) Differentially expressed transcripts/genes from RNA seq-(PLZF-kd 2 days diff-Vs Control Si 2 days diff, OR 2 days differentiation Vs naive)	475	63	2.27172	6.93249e-10	4.49183e-08	577d34f7-1aa5-5617-8d9b-520f80109d42
PMC6344081	PLZF targets developmental enhancers for activation during osteogenic differentiation of human mesenchymal stem cells	elife-40364-supp2.xlsx	K4me3Gain-ExpressionGain-K27meL-Unnamed_7	in H3K4me3 and increased gene expression at several genomic loci (Figure 1—figure supplement 1D–H, **Supplementary file 2**) K4me3Gain-ExpressionGain-K27meLoss	1438	139	1.6533	7.99573e-10	5.12211e-08	bf418814-dc10-5b3e-b2f9-31af0b3fc98a
PMC6344081	PLZF targets developmental enhancers for activation during osteogenic differentiation of human mesenchymal stem cells	elife-40364-supp1.xlsx	5days_Up_1_5fold-Symbol	2003. The time point chosen for our analyses was based on prior microarray analyses (**Supplementary file 1**) Microarray-Genes-differentially regulated (Osteogenic differentiation induced Vs Naive)	346	51	2.52664	7.99736e-10	5.12229e-08	501e4d28-5260-596d-86e1-10b8377bd83b
PMC6344081	PLZF targets developmental enhancers for activation during osteogenic differentiation of human mesenchymal stem cells	elife-40364-supp1.xlsx	2_days_Up_1_5_fold-Symbol	2003. The time point chosen for our analyses was based on prior microarray analyses (**Supplementary file 1**) Microarray-Genes-differentially regulated (Osteogenic differentiation induced Vs Naive)	308	42	2.33832	2.31325e-07	8.74681e-06	ef9c90b9-3d5c-55a4-8500-3eca5a8d83eb
PMC6344081	PLZF targets developmental enhancers for activation during osteogenic differentiation of human mesenchymal stem cells	elife-40364-supp5.xlsx	PLZF_peaks_H3K27Ac_gain-Unnamed_10	approximately 18% of the 2,282 genomic sites binding PLZF, gained H3K27ac (≥ 2 fold, **Supplementary file 5**) PLZF peaks-Expression of nearest transcript and H3K27ac changes	179	24	2.29166	0.000121185	0.00221547	0ae414b3-ff60-56e3-b933-8bcec2d0902c
PMC6344081	PLZF targets developmental enhancers for activation during osteogenic differentiation of human mesenchymal stem cells	elife-40364-supp1.xlsx	10days_down_1_5_fold-Symbol	2003. The time point chosen for our analyses was based on prior microarray analyses (**Supplementary file 1**) Microarray-Genes-differentially regulated (Osteogenic differentiation induced Vs Naive)	377	37	1.67746	0.00138531	0.0170407	922b248d-4d52-59da-b05e-7c974efbd4e5
PMC6355934	TBL1 is required for the mesenchymal phenotype of transformed breast cancer cells	41419_2019_1310_MOESM4_ESM.xlsx	Hoja1-Supplementary_Table_1_-_Levels_of_expression_in_log2_scale_of_824_epigenetic_and	of a set of 824 known and predicted chromatin and epigenetic factors (Supplementary Table **S1**) Supplementary Table S1	811	88	1.86844	6.5787e-09	3.5269e-07	f6ee3cc7-d5c4-54bc-8a87-9175b96070bb
PMC6359813	GSK-3β regulates the endothelial-to-mesenchymal transition via reciprocal crosstalk between NSCLC cells and HUVECs in multicellular tumor spheroid models	13046_2019_1050_MOESM2_ESM.xlsx	1_5folds-Gene_Symbol_representative	To validate the change of gene expression profiling on **2** The raw data from microarray. (XLSX 389 kb)	1298	99	1.30463	0.00282386	0.030123	fce786aa-bfe3-5189-b090-0766d6c0ae3e
PMC6368739	Coordination between TGF-β cellular signaling and epigenetic regulation during epithelial to mesenchymal transition	13072_2019_256_MOESM3_ESM.xlsx	B_Predicted_Kinases-Kinase_name	analysis of the proteome resulted in the total quantification of 2977 proteins, of which 2**3** Additional file 3: Table S2. Time-course monitoring of phosphorylation site abundance changes during EMT. (A) Total list of identified and quantified phosphosites across five time points. Protein IDs refer to UniProt database. Mod site highlights the phosphorylated S/T or Y residue within protein amino…	229	31	2.32391	9.90957e-06	0.000250569	d81b8a3d-d2ff-56f5-990e-ba14f16319e1
PMC6377707	Regulation of miRNAs by Snail during epithelial-to-mesenchymal transition in HT29 colon cancer cells	41598_2019_39200_MOESM3_ESM.xlsx	Arkusz2-ABCA5	to putative Snail-regulated miRNA/mRNA pathways engaged in early EMT (Table 1 and Supplementary Dataset **S3**) Supplementary Dataset S3	265	39	2.51542	9.05187e-08	3.75654e-06	a93e8da7-4587-50c9-a962-1877869fe4ed
PMC6377707	Regulation of miRNAs by Snail during epithelial-to-mesenchymal transition in HT29 colon cancer cells	41598_2019_39200_MOESM3_ESM.xlsx	Arkusz1-Unnamed_1	to putative Snail-regulated miRNA/mRNA pathways engaged in early EMT (Table 1 and Supplementary Dataset **S3**) Supplementary Dataset S3	266	39	2.50597	1.00237e-07	4.11329e-06	39473ca1-0f80-5136-8337-adc8c5840742
PMC6385178	miR-29a contributes to breast cancer cells epithelial–mesenchymal transition, migration, and invasion via down-regulating histone H4K20 trimethylation through directly targeting SUV420H2	41419_2019_1437_MOESM5_ESM.docx	0-Gene_Name	PicTar20. miRNAs (114) were found in the intersection part (Fig. 3a and Supplementary Tab. **S3**) Supplementary Table S3	113	16	2.4201	0.000869949	0.0116338	b54548a2-edee-5b16-b68b-e125acd3e66a
PMC6411034	A Cellular Anatomy of the Normal Adult Human Prostate and Prostatic Urethra	NIHMS1517612-supplement-4.xlsx	Endothelia-Unnamed_0	DEG list was subsequently derived and deployed to exclude stressed cells in future analyses (**Table S3**)	109	17	2.66572	0.000189894	0.00324428	19eea219-ed0f-593c-8e3f-723654cce006
PMC6428685	Specification and Diversification of Pericytes and Smooth Muscle Cells from Mesenchymoangioblasts	NIHMS1003476-supplement-Data_S2.xlsx	imPC_vs_imSMC-GENE_NAME_1	RGS5, MCAM, and CD248 with no or minimal upregulation of SMC genes (Figure 3E; **Data S2**)	2320	240	1.76814	6.02809e-21	2.25805e-18	5ac12b10-7136-5de4-8b1d-01f34fd3bff7
PMC6428685	Specification and Diversification of Pericytes and Smooth Muscle Cells from Mesenchymoangioblasts	NIHMS1003476-supplement-Data_S2.xlsx	imPC_vs_imSMC-GENE_NAME	RGS5, MCAM, and CD248 with no or minimal upregulation of SMC genes (Figure 3E; **Data S2**)	2388	244	1.74642	1.27206e-20	4.57953e-18	b08ba8a1-c825-546d-b6f4-0efcc5295435
PMC6428685	Specification and Diversification of Pericytes and Smooth Muscle Cells from Mesenchymoangioblasts	NIHMS1003476-supplement-Data_S2.xlsx	imPC_vs_MB-GENE_NAME_1	RGS5, MCAM, and CD248 with no or minimal upregulation of SMC genes (Figure 3E; **Data S2**)	2070	193	1.5936	3.8421e-12	3.79775e-10	8cbbce5d-9210-546a-b835-bd0b32f8a151
PMC6428685	Specification and Diversification of Pericytes and Smooth Muscle Cells from Mesenchymoangioblasts	NIHMS1003476-supplement-Data_S2.xlsx	imPC_vs_MB-GENE_NAME	RGS5, MCAM, and CD248 with no or minimal upregulation of SMC genes (Figure 3E; **Data S2**)	2115	196	1.58469	4.0861e-12	4.02059e-10	120a912f-bfa7-5ca0-b1bf-a51d67e206f3
PMC6428685	Specification and Diversification of Pericytes and Smooth Muscle Cells from Mesenchymoangioblasts	NIHMS1003476-supplement-Data_S2.xlsx	mSMC_vs_imSMC-GENE_NAME_1	RGS5, MCAM, and CD248 with no or minimal upregulation of SMC genes (Figure 3E; **Data S2**)	1096	106	1.65306	1.15086e-07	4.65984e-06	1f127ba2-3774-5ad6-a976-b4d1e3320a3e
PMC6428685	Specification and Diversification of Pericytes and Smooth Muscle Cells from Mesenchymoangioblasts	NIHMS1003476-supplement-Data_S2.xlsx	mSMC_vs_imSMC-GENE_NAME	RGS5, MCAM, and CD248 with no or minimal upregulation of SMC genes (Figure 3E; **Data S2**)	1128	107	1.62131	2.60845e-07	9.74114e-06	a36e6038-6367-584f-80c4-3baafad2078b
PMC6428685	Specification and Diversification of Pericytes and Smooth Muscle Cells from Mesenchymoangioblasts	NIHMS1003476-supplement-Data_S1.xlsx	MB_specific_markers-GENE_NAME	critical for the development of the heart and extraembryonic mesoderm (Figures 3B and 3F; **Data S1**)	444	49	1.88628	1.31543e-05	0.000322101	9f3386b6-a457-5d48-8e78-3b0ce507070b
PMC6428685	Specification and Diversification of Pericytes and Smooth Muscle Cells from Mesenchymoangioblasts	NIHMS1003476-supplement-Data_S1.xlsx	MB_specific_markers-Unnamed_0	critical for the development of the heart and extraembryonic mesoderm (Figures 3B and 3F; **Data S1**)	450	49	1.86113	1.87904e-05	0.000440107	ec719bfb-b3ff-5290-a599-defbc051998d
PMC6435685	Aberrant FGFR signaling mediates resistance to CDK4/6 inhibitors in ER+ breast cancer	41467_2019_9068_MOESM4_ESM.csv	Gene_Name	correlations between gene expression levels and PFS, patients were classified into low and high FGFR**1** Supplementary Data 1	770	87	1.93117	1.64968e-09	9.96217e-08	127a715c-6fa2-52bf-a568-f09f220c95b5
PMC6439275	Bone Marrow Mesenchymal Stem Cell-Derived Exosomal MicroRNA-126-3p Inhibits Pancreatic Cancer Development by Targeting ADAM9	mmc1.xls	Sheet1-GSE16515	results of the initial 400 differentially expressed genes of each chip are depicted in **Table S1** Table S1. The Raw Data for the Experimental Statistical Analysis of Figure 1A	391	39	1.70483	0.000767044	0.0104635	de62e56c-0633-5980-8189-ed80d6266cbc
PMC6459557	Up-regulation of FOXD1 by YAP alleviates senescence and osteoarthritis	pbio.3000201.s010.xlsx	sheet-Unnamed_14	hMSCs exhibited a substantial number of differentially expressed genes (Figs 3D and S4E and **S2**) Differentially expressed genes in YAP−/− and TAZ−/− hMSCs, compared to WT hMSCs.hMSC, human mesenchymal stem cell; TAZ, transcriptional coactivator with PDZ-binding motif; WT, wild type; YAP, Yes-associated protein.(XLSX) Click here for additional data file	827	77	1.59139	2.76854e-05	0.000617934	306c03fc-a5b9-5fef-9bde-88f24c6ec38a
PMC6459557	Up-regulation of FOXD1 by YAP alleviates senescence and osteoarthritis	pbio.3000201.s013.xlsx	Sheet1-Unnamed_6	addition, we also examined the gene expression profile of FOXD1 KO hMSCs using RNA-seq (**S5 Data**) Differentially expressed genes identified by RNA-seq in FOXD1-sgRNA hMSCs compared to NTC-sgRNA hMSCs.FOXD1, forkhead box D1; hMSC, human mesenchymal stem cell; NTC, non-targeting control; RNA-seq, RNA sequencing; sgRNA, single guide RNA.(XLSX) Click here for additional data file	433	45	1.7763	0.000123539	0.00225426	5d2ec2b3-0069-5505-86a7-c77b6e1bb1d1
PMC6459557	Up-regulation of FOXD1 by YAP alleviates senescence and osteoarthritis	pbio.3000201.s010.xlsx	sheet-Unnamed_30	hMSCs exhibited a substantial number of differentially expressed genes (Figs 3D and S4E and **S2**) Differentially expressed genes in YAP−/− and TAZ−/− hMSCs, compared to WT hMSCs.hMSC, human mesenchymal stem cell; TAZ, transcriptional coactivator with PDZ-binding motif; WT, wild type; YAP, Yes-associated protein.(XLSX) Click here for additional data file	66	11	2.84866	0.00143669	0.0175179	e30527d8-4781-5de3-86f5-0b7ca1110cf9
PMC6482152	OVOL2 induces mesenchymal-to-epithelial transition in fibroblasts and enhances cell-state reprogramming towards epithelial lineages	41598_2019_43021_MOESM3_ESM.xlsx	Keratino_vs_Fibro_summary-TF_Name	more accessible in keratinocytes (q < 0.01 and enrichment_score > 5) (Fig. 6A, Table **S2**) Table S2	796	66	1.42074	0.00217269	0.0244376	608ee93c-f61f-58f5-a9bb-3632a021dab2
PMC6491796	Gene signatures of quiescent glioblastoma cells reveal mesenchymal shift and interactions with niche microenvironment	mmc1.xlsx	Sheet1-DEG_in_4_wk_chase_653	Supplementary Table S1List of DEG in qGBM.xlsxLists of differentially expressed genes (DEGs) between GFPhigh (quiescent) and GFPlow (proliferative) cells in organoids of GBM cell line SD3. DEGs from 2 and 4 week -Dox chase organoids are shown (filtered for protein coding genes). Also listed are the common DEGs of both chase paradigms	649	85	2.23855	1.32932e-12	1.42441e-10	168129a4-e59e-58fc-a041-8501c8a0f992
PMC6491796	Gene signatures of quiescent glioblastoma cells reveal mesenchymal shift and interactions with niche microenvironment	mmc1.xlsx	Sheet1-DEG_in_2_wk_chase_1195	Supplementary Table S1List of DEG in qGBM.xlsxLists of differentially expressed genes (DEGs) between GFPhigh (quiescent) and GFPlow (proliferative) cells in organoids of GBM cell line SD3. DEGs from 2 and 4 week -Dox chase organoids are shown (filtered for protein coding genes). Also listed are the common DEGs of both chase paradigms	1184	122	1.76117	2.34529e-10	1.66713e-08	58f226d9-58b4-5e9d-9a18-0d62a4cedfe9
PMC6491796	Gene signatures of quiescent glioblastoma cells reveal mesenchymal shift and interactions with niche microenvironment	mmc1.xlsx	Sheet1-DEG_common_in_2_wk_and_4_wk_345	Supplementary Table S1List of DEG in qGBM.xlsxLists of differentially expressed genes (DEGs) between GFPhigh (quiescent) and GFPlow (proliferative) cells in organoids of GBM cell line SD3. DEGs from 2 and 4 week -Dox chase organoids are shown (filtered for protein coding genes). Also listed are the common DEGs of both chase paradigms	342	48	2.39887	1.3985e-08	6.9745e-07	d4261cc4-651c-57e5-91fd-1836ab12faeb
PMC6491796	Gene signatures of quiescent glioblastoma cells reveal mesenchymal shift and interactions with niche microenvironment	mmc4.xlsx	tcga_lggGBM_rnaseqv2_megena_spe-gene	Supplementary Table S4Hub genes of c1_21 c1_360 Pubmed sorted.xlsxList of top hub genes for the modules c1_21 and c1_360 showing the number of Pubmed citations for a given query term (e.g., ‘glioma.pubmed’ means a query of the gene name and “glioma”), as well as status of a gene as significant qGBM DEG (0=false, 1=true)	37	7	3.23362	0.00504	0.0472575	f0456478-b029-5699-b70b-4ea29585a308
PMC6491961	Increased glycolysis correlates with elevated immune activity in tumor immune microenvironment	mmc4.xlsx	Table_S1-Unnamed_15	Supplementary material	96	13	2.31454	0.00381759	0.0381412	ad55a6d2-5d02-5d28-ab00-9aef061aef62
PMC6501285	RNA sequencing of mesenchymal stem cells reveals a blocking of differentiation and immunomodulatory activities under inflammatory conditions in rheumatoid arthritis patients	13075_2019_1894_MOESM3_ESM.xlsx	GO-Plot-Approved_symbol	PBMCs and exposed to resting RA PBMCs, we observed 847 DEGs in total, with 2**3** Table S3. Number of reads successfully mapped and assigned to the metafeature “gene” per sample. (XLSX 3343 kb)	830	91	1.87847	2.71378e-09	1.57007e-07	e71afa39-2e2c-59c4-add3-98f0a043d4b1
PMC6501285	RNA sequencing of mesenchymal stem cells reveals a blocking of differentiation and immunomodulatory activities under inflammatory conditions in rheumatoid arthritis patients	13075_2019_1894_MOESM3_ESM.xlsx	GO-Plot-HGNC_ID	PBMCs and exposed to resting RA PBMCs, we observed 847 DEGs in total, with 2**3** Table S3. Number of reads successfully mapped and assigned to the metafeature “gene” per sample. (XLSX 3343 kb)	828	91	1.87847	2.71378e-09	1.57007e-07	92ecd0b7-6427-5a7b-87e0-399ec15ae44f
PMC6501285	RNA sequencing of mesenchymal stem cells reveals a blocking of differentiation and immunomodulatory activities under inflammatory conditions in rheumatoid arthritis patients	13075_2019_1894_MOESM3_ESM.xlsx	GO-Plot-Input	PBMCs and exposed to resting RA PBMCs, we observed 847 DEGs in total, with 2**3** Table S3. Number of reads successfully mapped and assigned to the metafeature “gene” per sample. (XLSX 3343 kb)	807	88	1.86612	6.98104e-09	3.71764e-07	25fa8364-bbaf-5172-9982-3c10fafee7ac
PMC6501285	RNA sequencing of mesenchymal stem cells reveals a blocking of differentiation and immunomodulatory activities under inflammatory conditions in rheumatoid arthritis patients	13075_2019_1894_MOESM3_ESM.xlsx	UPREGULATED-Input	PBMCs and exposed to resting RA PBMCs, we observed 847 DEGs in total, with 2**3** Table S3. Number of reads successfully mapped and assigned to the metafeature “gene” per sample. (XLSX 3343 kb)	576	61	1.81009	4.37733e-06	0.000121426	255252bd-3a39-5106-aeff-dfa006a86b0b
PMC6501285	RNA sequencing of mesenchymal stem cells reveals a blocking of differentiation and immunomodulatory activities under inflammatory conditions in rheumatoid arthritis patients	13075_2019_1894_MOESM3_ESM.xlsx	UPREGULATED-HGNC_ID	PBMCs and exposed to resting RA PBMCs, we observed 847 DEGs in total, with 2**3** Table S3. Number of reads successfully mapped and assigned to the metafeature “gene” per sample. (XLSX 3343 kb)	590	62	1.79611	4.68116e-06	0.000128766	5ae8654a-54b4-5c62-88a8-3f96a87fd5dc
PMC6501285	RNA sequencing of mesenchymal stem cells reveals a blocking of differentiation and immunomodulatory activities under inflammatory conditions in rheumatoid arthritis patients	13075_2019_1894_MOESM3_ESM.xlsx	UPREGULATED-Approved_symbol	PBMCs and exposed to resting RA PBMCs, we observed 847 DEGs in total, with 2**3** Table S3. Number of reads successfully mapped and assigned to the metafeature “gene” per sample. (XLSX 3343 kb)	591	62	1.79611	4.68116e-06	0.000128766	f8e0bfc8-700f-5462-8812-1c3007f491c0
PMC6501285	RNA sequencing of mesenchymal stem cells reveals a blocking of differentiation and immunomodulatory activities under inflammatory conditions in rheumatoid arthritis patients	13075_2019_1894_MOESM3_ESM.xlsx	DOWNREGULATED-Approved_symbol	PBMCs and exposed to resting RA PBMCs, we observed 847 DEGs in total, with 2**3** Table S3. Number of reads successfully mapped and assigned to the metafeature “gene” per sample. (XLSX 3343 kb)	242	29	2.05671	0.000176422	0.00305128	589c7cc8-89d7-5110-b9fb-3b4d1518f0fb
PMC6501285	RNA sequencing of mesenchymal stem cells reveals a blocking of differentiation and immunomodulatory activities under inflammatory conditions in rheumatoid arthritis patients	13075_2019_1894_MOESM3_ESM.xlsx	DOWNREGULATED-HGNC_ID	PBMCs and exposed to resting RA PBMCs, we observed 847 DEGs in total, with 2**3** Table S3. Number of reads successfully mapped and assigned to the metafeature “gene” per sample. (XLSX 3343 kb)	241	29	2.05671	0.000176422	0.00305128	589c7cc8-89d7-5110-b9fb-3b4d1518f0fb
PMC6501285	RNA sequencing of mesenchymal stem cells reveals a blocking of differentiation and immunomodulatory activities under inflammatory conditions in rheumatoid arthritis patients	13075_2019_1894_MOESM3_ESM.xlsx	Downregulated_Features-Cell_adhesion_BP	PBMCs and exposed to resting RA PBMCs, we observed 847 DEGs in total, with 2**3** Table S3. Number of reads successfully mapped and assigned to the metafeature “gene” per sample. (XLSX 3343 kb)	24	7	4.98516	0.000329225	0.00518554	28d98d7d-cbd4-58ec-9acc-3d58f8a37ba4
PMC6501285	RNA sequencing of mesenchymal stem cells reveals a blocking of differentiation and immunomodulatory activities under inflammatory conditions in rheumatoid arthritis patients	13075_2019_1894_MOESM3_ESM.xlsx	DOWNREGULATED-Input	PBMCs and exposed to resting RA PBMCs, we observed 847 DEGs in total, with 2**3** Table S3. Number of reads successfully mapped and assigned to the metafeature “gene” per sample. (XLSX 3343 kb)	231	27	2.00645	0.000432771	0.00652776	32c6b835-fb9d-56ea-965a-c2debddd7df8
PMC6501285	RNA sequencing of mesenchymal stem cells reveals a blocking of differentiation and immunomodulatory activities under inflammatory conditions in rheumatoid arthritis patients	13075_2019_1894_MOESM3_ESM.xlsx	Upregulated_Features-Cytokine_mediated_signaling_pathway_BP	PBMCs and exposed to resting RA PBMCs, we observed 847 DEGs in total, with 2**3** Table S3. Number of reads successfully mapped and assigned to the metafeature “gene” per sample. (XLSX 3343 kb)	51	10	3.35137	0.00063641	0.0089806	071f7784-eff1-5dd2-9ba0-d0b2d1b34871
PMC6501285	RNA sequencing of mesenchymal stem cells reveals a blocking of differentiation and immunomodulatory activities under inflammatory conditions in rheumatoid arthritis patients	13075_2019_1894_MOESM3_ESM.xlsx	Upregulated_Features-immune_response_BP	PBMCs and exposed to resting RA PBMCs, we observed 847 DEGs in total, with 2**3** Table S3. Number of reads successfully mapped and assigned to the metafeature “gene” per sample. (XLSX 3343 kb)	72	12	2.84866	0.000887249	0.0118118	9d2ae607-0e4a-5734-8f55-02ab732d1d34
PMC6509164	Mesenchymal stem cells of Systemic Sclerosis patients, derived from different sources, show a profibrotic microRNA profiling	41598_2019_43638_MOESM2_ESM.doc	0-	Using microT-CDS, we reported in Supplementary **S2** Supplementary Table S2	238	29	2.08264	0.000141811	0.00253552	55ecbb55-d573-5b38-b42d-31a6066fb663
PMC6514858	A molecular portrait of epithelial–mesenchymal plasticity in prostate cancer associated with clinical outcome	41388_2018_488_MOESM1_ESM.xlsx	Cluster_I-1_2	expressed in the LNCaP–iGFP cells at any timepoint during the experiment (fold change ± **1**) Supplemental dataset 1 - Clusters	1094	116	1.81231	1.23596e-10	9.3064e-09	4b0fb1e1-51f7-5e4a-a356-dba559e4f574
PMC6514858	A molecular portrait of epithelial–mesenchymal plasticity in prostate cancer associated with clinical outcome	41388_2018_488_MOESM2_ESM.xlsx	EMT_GES-EMT_GES	As EMT has been extensively studied in multiple human carcinoma types [17–**2**] Supplemental dataset 2 - Signature lists and Oncomine	949	103	1.85508	4.32573e-10	2.91873e-08	e67b0601-61e9-5251-bde4-ebabb510079a
PMC6514858	A molecular portrait of epithelial–mesenchymal plasticity in prostate cancer associated with clinical outcome	41388_2018_488_MOESM1_ESM.xlsx	MErT20_vs_NoDox-Snail-Unnamed_1	expressed in the LNCaP–iGFP cells at any timepoint during the experiment (fold change ± **1**) Supplemental dataset 1 - Clusters	815	89	1.86649	5.63038e-09	3.05937e-07	513b13d0-42f1-5c1e-a103-8319a587733a
PMC6514858	A molecular portrait of epithelial–mesenchymal plasticity in prostate cancer associated with clinical outcome	41388_2018_488_MOESM2_ESM.xlsx	MErT_GES-MErT_GES	As EMT has been extensively studied in multiple human carcinoma types [17–**2**] Supplemental dataset 2 - Signature lists and Oncomine	951	98	1.76132	1.75093e-08	8.54228e-07	8586651c-09e0-5490-a8f4-904db3c320ab
PMC6514858	A molecular portrait of epithelial–mesenchymal plasticity in prostate cancer associated with clinical outcome	41388_2018_488_MOESM1_ESM.xlsx	Cluster_V-1_2	expressed in the LNCaP–iGFP cells at any timepoint during the experiment (fold change ± **1**) Supplemental dataset 1 - Clusters	253	37	2.49962	2.27278e-07	8.61222e-06	b9d2f9f4-b4cc-5791-a004-2c255a7d7d69
PMC6514858	A molecular portrait of epithelial–mesenchymal plasticity in prostate cancer associated with clinical outcome	41388_2018_488_MOESM2_ESM.xlsx	MERT_GES_-_Slug-MErT_GES_Slug	As EMT has been extensively studied in multiple human carcinoma types [17–**2**] Supplemental dataset 2 - Signature lists and Oncomine	948	92	1.65872	7.53303e-07	2.51391e-05	07f106a2-617e-5d48-bdc7-189508999279
PMC6514858	A molecular portrait of epithelial–mesenchymal plasticity in prostate cancer associated with clinical outcome	41388_2018_488_MOESM1_ESM.xlsx	Cluster_III-1_2	expressed in the LNCaP–iGFP cells at any timepoint during the experiment (fold change ± **1**) Supplemental dataset 1 - Clusters	647	68	1.79638	1.58778e-06	4.91391e-05	c89bb0a1-3415-59b5-bede-9efae0e1e886
PMC6514858	A molecular portrait of epithelial–mesenchymal plasticity in prostate cancer associated with clinical outcome	41388_2018_488_MOESM1_ESM.xlsx	Cluster_XIV-1_2	expressed in the LNCaP–iGFP cells at any timepoint during the experiment (fold change ± **1**) Supplemental dataset 1 - Clusters	43	10	3.97488	0.000146104	0.00259564	be806f6a-dbb8-595c-8128-e54ef58427d2
PMC6514858	A molecular portrait of epithelial–mesenchymal plasticity in prostate cancer associated with clinical outcome	41388_2018_488_MOESM2_ESM.xlsx	MPS-CCR-MPS-CCR	As EMT has been extensively studied in multiple human carcinoma types [17–**2**] Supplemental dataset 2 - Signature lists and Oncomine	507	50	1.6856	0.000192374	0.00327602	3f3b9200-f2aa-5be7-95a4-de4e4273e24e
PMC6514858	A molecular portrait of epithelial–mesenchymal plasticity in prostate cancer associated with clinical outcome	41388_2018_488_MOESM1_ESM.xlsx	Cluster_II-1_2	expressed in the LNCaP–iGFP cells at any timepoint during the experiment (fold change ± **1**) Supplemental dataset 1 - Clusters	536	49	1.56251	0.00120951	0.0152588	6d003c95-d709-5112-b67d-f91fd7539a98
PMC6514858	A molecular portrait of epithelial–mesenchymal plasticity in prostate cancer associated with clinical outcome	41388_2018_488_MOESM2_ESM.xlsx	MPS-MPS	As EMT has been extensively studied in multiple human carcinoma types [17–**2**] Supplemental dataset 2 - Signature lists and Oncomine	690	59	1.46149	0.00197029	0.0225792	1636a122-3b4b-59f0-9a38-8a7dd717b3cf
PMC6542832	Neoplastic Transformation of Human Mesenchymal Stromal Cells Mediated via LIN28B	41598_2019_44536_MOESM2_ESM.xlsx	Up_and_Down_Genes_Tu_vs_Non_Tu-Unnamed_16	hBMSC-Tum cells exhibited higher proliferation rates in vitro compared to parental control cells (Fig. **1**) Supplementary Table 1	2296	212	1.57887	5.31448e-13	6.12838e-11	b594fe87-5786-5020-aada-f4568e91e5db
PMC6549139	Mesenchymal stromal cell activation by breast cancer secretomes in bioengineered 3D microenvironments	LSA-2019-00304_TableS5.xlsx	Supplementary_Table_5-Unnamed_1		81	12	2.53215	0.00252288	0.0276264	503cab13-af4a-5f89-922e-d0e63f0ab36f
PMC6556210	Bone Vascular Niche E-selectin Induces Mesenchymal-Epithelial Transition and Wnt Activation in Cancer Cells to Promote Bone Metastasis	NIHMS1523526-supplement-Sup_Table_2.xls	MS-Unnamed_1	in the identification of 1037 unique N-glycosites that mapped to 541 proteins (Fig. 4a, **Supplementary Table 2**)	620	66	1.81947	1.46572e-06	4.57668e-05	68582b04-0b90-51bb-a605-ebfe4c39bc23
PMC6590480	Inflammation induces endothelial‐to‐mesenchymal transition and promotes vascular calcification through downregulation of BMPR2	PATH-247-333-s006.docx	2-Antibody	Supplementary Material and Methods Click here for additional data file	6	3	8.54599	0.00349227	0.0355141	7ff8a791-8d26-58ed-a667-06fa8fe65b69
PMC6656769	The role of GRHL2 and epigenetic remodeling in epithelial–mesenchymal plasticity in ovarian cancer cells	42003_2019_506_MOESM2_ESM.xlsx	Data_9-Unnamed_1	From previous gene expression profiling of ovarian cancer cell lines, 306 mesenchymal and 2**1** Supplementary Data 1-10	480	64	2.27893	4.42547e-10	2.97941e-08	38184c5b-50ba-5dfd-b095-58e495cc04cd
PMC6656769	The role of GRHL2 and epigenetic remodeling in epithelial–mesenchymal plasticity in ovarian cancer cells	42003_2019_506_MOESM2_ESM.xlsx	Data_6-Unnamed_2	From previous gene expression profiling of ovarian cancer cell lines, 306 mesenchymal and 2**1** Supplementary Data 1-10	2408	204	1.44859	3.58789e-09	2.02708e-07	f25c3c3e-4aac-50d3-b7a6-3c2af4bd1c44
PMC6656769	The role of GRHL2 and epigenetic remodeling in epithelial–mesenchymal plasticity in ovarian cancer cells	42003_2019_506_MOESM2_ESM.xlsx	Data_1-Unnamed_2	From previous gene expression profiling of ovarian cancer cell lines, 306 mesenchymal and 2**1** Supplementary Data 1-10	2398	203	1.44751	4.24037e-09	2.35952e-07	8cec4c6c-b7dd-5f52-9261-ef208eb931cf
PMC6656769	The role of GRHL2 and epigenetic remodeling in epithelial–mesenchymal plasticity in ovarian cancer cells	42003_2019_506_MOESM2_ESM.xlsx	Data_5-Supplementary_Data_5_Enrichment_of_EMT-correlated_DMCs_in_ChIP-seq_database_ReMap_2018_v1_2	From previous gene expression profiling of ovarian cancer cell lines, 306 mesenchymal and 2**1** Supplementary Data 1-10	304	42	2.36139	1.7603e-07	6.83135e-06	82a77a54-ecb6-5e88-abea-b94dcdb1b8e5
PMC6656769	The role of GRHL2 and epigenetic remodeling in epithelial–mesenchymal plasticity in ovarian cancer cells	42003_2019_506_MOESM2_ESM.xlsx	Data_3-Supplementary_Data_3_Ovarian_cancer_EMT_signature_genes_with_EMT-correlated_DMCs_at_different_genomic_regions	From previous gene expression profiling of ovarian cancer cell lines, 306 mesenchymal and 2**1** Supplementary Data 1-10	419	44	1.79486	0.000115792	0.00213482	4f008523-5a62-57d7-b0be-196051c2e0d1
PMC6657958	Molecular dissection of the oncogenic role of ETS1 in the mesenchymal subtypes of head and neck squamous cell carcinoma	pgen.1008250.s011.xlsx	DESeq2_Mesenchymal_Genes-Unnamed_0	of the ECM, cellular locomotion, cellular differentiation in addition to EMT itself (Fig 2B, **S1 Table**) Mesenchymal subtype enriched genes in the TCGA HNSCC datasets.Columns A represent the genes that were significantly enriched in the MS subtype of HNSCC as determined via DESeq2 analysis, whereby Differentially Expressed Genes (DEGs) were calculated between the MS subtype and each other subty…	2092	192	1.57092	1.59501e-11	1.40635e-09	555daee5-dcf2-5358-85e6-2547eae0969b
PMC6657958	Molecular dissection of the oncogenic role of ETS1 in the mesenchymal subtypes of head and neck squamous cell carcinoma	pgen.1008250.s011.xlsx	DESeq2_Atypical_Genes-Unnamed_0	of the ECM, cellular locomotion, cellular differentiation in addition to EMT itself (Fig 2B, **S1 Table**) Mesenchymal subtype enriched genes in the TCGA HNSCC datasets.Columns A represent the genes that were significantly enriched in the MS subtype of HNSCC as determined via DESeq2 analysis, whereby Differentially Expressed Genes (DEGs) were calculated between the MS subtype and each other subty…	2198	171	1.33093	1.96327e-05	0.000457659	6a62aa26-5242-5989-a7dc-2b1545ce1847
PMC6657958	Molecular dissection of the oncogenic role of ETS1 in the mesenchymal subtypes of head and neck squamous cell carcinoma	pgen.1008250.s015.xlsx	ETS1_siRNA-Unnamed_0	the mRNA landscape of the SCC25 cells with 6727 genes showing statistically meaningful changes (**S5 Table**) Genes dependent upon ETS1 function in SCC25 cells.The output of DESeq2 analysis of the transcriptomic profile comparisons of SCC25 cells either with ETS1 knocked down using shRNA and compared with non-targeting control shRNA (Sheet 1) or SCC25s transiently transfected with ETS1-targeting …	771	69	1.53162	0.000228494	0.00380051	1fac429e-dfe3-54be-b085-bdeddb668e86
PMC6657958	Molecular dissection of the oncogenic role of ETS1 in the mesenchymal subtypes of head and neck squamous cell carcinoma	pgen.1008250.s017.xlsx	Sheet_1-Unnamed_0	types[60] and found a significant overlap with the SCC25 ETS1 target genes (Fig 9A, **S7 Table**) Direct targets of ETS1 that overlap with the Pan-Cancer EMT signature.Column A represents the direct targets of ETS1 that overlap with the Pan-Cancer EMT Signature (Tan et al., EMBO Mol. Med. 2014 Oct; 6(10): 1279–1293). Direct targets of ETS1 were determined by the intersection of genes bound by ETS…	69	12	2.97252	0.000598061	0.00853245	4e8b9163-af5c-52db-b48d-06c188347110
PMC6657958	Molecular dissection of the oncogenic role of ETS1 in the mesenchymal subtypes of head and neck squamous cell carcinoma	pgen.1008250.s018.xlsx	deg_shETS1_vs_shCON_minexpress-Unnamed_0	in the identification of a core ETS1 driven 169 Mesenchymal gene signature (ETS1 MGS, **S8 Table**) ETS1 Mesenchymal gene signature.Column A represents the genes associated with the ETS1 Mesenchymal Gene Signature, as determined (details in the methods section). Columns B-G represent the raw DESeq2 generated output.(XLSX) Click here for additional data file	169	21	2.12386	0.0008737	0.0116626	7f9c5752-4ed7-53a1-8c4e-e863739e47b4
PMC6665952	The Upregulation of Toll-Like Receptor 3 via Autocrine IFN-β Signaling Drives the Senescence of Human Umbilical Cord Blood-Derived Mesenchymal Stem Cells Through JAK1	Data_Sheet_1.docx	0-Target_gene	Connect Real-Time PCR Detection System (Bio-rad, Hercules, CA). The primers used are described in **Supplementary Table 1** Click here for additional data file	19	5	4.49789	0.00395797	0.0391193	a36a6780-7895-5557-9d7e-b7800c8e2467
PMC6667841	Diagnostic and prognostic values of integrin α subfamily mRNA expression in colon adenocarcinoma	or-42-03-0923.nxml	Unnamed_0	genes. Multivariate analysis indicated that ITGA5 exhibited statistical significance [P=0.016; HR (95% CI)=1.681 (1.100–2.570)] (**Table II**) Prognostic values of ITGA subfamily gene expression in COAD of a TCGA cohortGeneITGA1LowHighITGA2ITGA2BITGA3ITGA4ITGA5ITGA6ITGA7ITGA8ITGA9ITGA10ITGA11ITGADITGAEITGALITGAMITGAVITGAX	18	6	5.69733	0.000398259	0.00607741	fe26c1f5-798a-5308-b0e1-24f2e1fdd0d4
PMC6697940	miR-504 suppresses mesenchymal phenotype of glioblastoma by directly targeting the FZD7-mediated Wnt–β-catenin pathway	13046_2019_1370_MOESM9_ESM.xlsx	Sheet1-Candidate_genes_predicted_by_all_methods	and identified common candidate genes they predicted (detailed gene information is in Additional file **9**) Table S5. Candidate genes predicted by TargetScan, miRDB, and PITA. (XLSX 38 kb)	243	28	1.96945	0.000462305	0.00689563	19dfef33-3b53-5a78-9d73-f3398f97e75e
PMC6697940	miR-504 suppresses mesenchymal phenotype of glioblastoma by directly targeting the FZD7-mediated Wnt–β-catenin pathway	13046_2019_1370_MOESM9_ESM.xlsx	Sheet1-Unnamed_2	and identified common candidate genes they predicted (detailed gene information is in Additional file **9**) Table S5. Candidate genes predicted by TargetScan, miRDB, and PITA. (XLSX 38 kb)	1378	109	1.35198	0.000499933	0.0073592	fa7b569e-0b13-5ed5-8629-ead868a7cc1f
PMC6711891	Synaptotagmin 7 in twist-related protein 1-mediated epithelial – Mesenchymal transition of non-small cell lung cancer	mmc2.xlsx	工作表1-Gene_Symbol	Supplementary Table 2List of 1297 DEGs	1239	123	1.69953	1.77696e-09	1.06756e-07	d04a9201-59aa-520e-a1b8-11e3cf9867b8
PMC6731669	Diverse repertoire of human adipocyte subtypes develops from transcriptionally distinct mesenchymal progenitor cells	pnas.1906512116.sd04.xlsx	Dataset_S4-Dataset_S4_Genes_significantly_changed_in_the_same_direction_in_both_Cluster_2_vs_all_others_and_NeckS_vs_AbdSQ		611	67	1.87424	4.20935e-07	1.49595e-05	ac542acd-3c85-5b77-9a62-5676e175a5f7
PMC6731669	Diverse repertoire of human adipocyte subtypes develops from transcriptionally distinct mesenchymal progenitor cells	pnas.1906512116.sd04.xlsx	Dataset_S4-Unnamed_7		500	52	1.77757	3.66011e-05	0.000787817	78ef507f-f6a6-5638-bac3-bff1d9e941e9
PMC6755709	Umbilical cord as a long-term source of activatable mesenchymal stromal cells for immunomodulation	13287_2019_1376_MOESM5_ESM.xlsx	Additional_Table_4-Gene_Symbol	we partially mimic an inflammatory environment by the addition of IFN-γ and TNF-α (+ 2**5**) Table S4. Contains a list of only significantly deregulated genes regarding MHC molecules from the IPA analysis. (XLSX 8 kb)	20	6	5.12759	0.000751745	0.0102857	fa991026-0af3-5c09-a985-9252fb3cbe31
PMC6796540	TGF-β-induced transgelin promotes bladder cancer metastasis by regulating epithelial-mesenchymal transition and invadopodia formation	mmc6.xlsx	DEGs-Unnamed_4	respectively. The differentially expressed genes (DEGs) in the two cohorts were determined (Fig. 2a, **Supplementary Table S6**) Supplementary Table S6Consensus genes of differentially expressed genes by TAGLN in TCGA-BLCA and GSE13507-BLCA cohorts and enrichment analyses	1320	136	1.76099	1.76536e-11	1.54559e-09	d81d7598-8115-5e9c-aabf-1592c6864254
PMC6796540	TGF-β-induced transgelin promotes bladder cancer metastasis by regulating epithelial-mesenchymal transition and invadopodia formation	mmc6.xlsx	DEGs-Unnamed_1	respectively. The differentially expressed genes (DEGs) in the two cohorts were determined (Fig. 2a, **Supplementary Table S6**) Supplementary Table S6Consensus genes of differentially expressed genes by TAGLN in TCGA-BLCA and GSE13507-BLCA cohorts and enrichment analyses	1732	157	1.55023	5.01834e-09	2.75283e-07	10159c73-6c81-5d39-bf50-c0921d34a512
PMC6796540	TGF-β-induced transgelin promotes bladder cancer metastasis by regulating epithelial-mesenchymal transition and invadopodia formation	mmc6.xlsx	DEGs-Table_S6-1_Consensus_genes_of_differentially_expressed_genes_by_TAGLN_in_TCGA-BLCA_and_GSE13507-BLCA_cohorts	respectively. The differentially expressed genes (DEGs) in the two cohorts were determined (Fig. 2a, **Supplementary Table S6**) Supplementary Table S6Consensus genes of differentially expressed genes by TAGLN in TCGA-BLCA and GSE13507-BLCA cohorts and enrichment analyses	1240	121	1.66785	7.46541e-09	3.95531e-07	b5b5602b-f6df-5452-a01f-699173991019
PMC6796540	TGF-β-induced transgelin promotes bladder cancer metastasis by regulating epithelial-mesenchymal transition and invadopodia formation	mmc6.xlsx	DEGs-Unnamed_6	respectively. The differentially expressed genes (DEGs) in the two cohorts were determined (Fig. 2a, **Supplementary Table S6**) Supplementary Table S6Consensus genes of differentially expressed genes by TAGLN in TCGA-BLCA and GSE13507-BLCA cohorts and enrichment analyses	332	45	2.31668	1.12805e-07	4.57751e-06	6d1cb6fe-919c-5cd9-8dcb-17735cf72719
PMC6796540	TGF-β-induced transgelin promotes bladder cancer metastasis by regulating epithelial-mesenchymal transition and invadopodia formation	mmc6.xlsx	DEGs-Unnamed_2	respectively. The differentially expressed genes (DEGs) in the two cohorts were determined (Fig. 2a, **Supplementary Table S6**) Supplementary Table S6Consensus genes of differentially expressed genes by TAGLN in TCGA-BLCA and GSE13507-BLCA cohorts and enrichment analyses	674	71	1.80049	8.49707e-07	2.7999e-05	78f967b6-4bf1-54df-b5e8-da10cc8fbd72
PMC6900598	HERES, a lncRNA that regulates canonical and noncanonical Wnt signaling pathways via interaction with EZH2	pnas.1912126116.sd07.xlsx	Dataset_S7-Dataset_S7_NanoString_nCounter_expression_results		770	87	1.93117	1.64968e-09	9.96217e-08	127a715c-6fa2-52bf-a568-f09f220c95b5
PMC6914426	Multi-omics analysis reveals epithelial-mesenchymal transition-related gene FOXM1 as a novel prognostic biomarker in clear cell renal carcinoma	aging-11-102459-s003..docx	0-Supplementary_Table_S1_756_EMT-related_genes_identified_by_text-mining_in_this_study	types (Figure 2A). A total of 20 miRNAs and 736 protein-coding genes were identified (**Supplementary Table 1**)	733	71	1.65557	1.60933e-05	0.000384875	b1b57926-7a56-594c-8bbf-ca01cf753e37
PMC6926017	Fbxw7 is a driver of uterine carcinosarcoma by promoting epithelial-mesenchymal transition	pnas.1911310116.sd01.xlsx	Table_S1-Supporting_Information_Table_S1_Custom_capture_panel_for_analysis_of_Fbxw7_Pten_mouse_tumors_n_76_genes_with_general_coverage_statistics		74	11	2.5407	0.00365593	0.036802	21c572f2-9e4a-54ca-a132-9849bc00b5d2
PMC6930919	LDHA Promotes Oral Squamous Cell Carcinoma Progression Through Facilitating Glycolysis and Epithelial–Mesenchymal Transition	Table_1.XLSX	red_module-genes	red module, this study applied the R package “clusterProfiler” for GO and KEGG analyses (**Supplementary Data Sheet 1**) Genes of red module Click here for additional data file	228	36	2.69873	4.65949e-08	2.06377e-06	9b88845c-a409-53c1-b19f-3a9126e72788
PMC6933412	Pancreatic cancer cell–derived exosomal microRNA‐27a promotes angiogenesis of human microvascular endothelial cells in pancreatic cancer via BTG2	JCMM-24-588-s006.xlsx	Sheet1-Unnamed_2	sets was conducted based on |log2FoldChange| > 1.0 and P value < .05 (Table **S2**) Click here for additional data file	391	39	1.70483	0.000767044	0.0104635	de62e56c-0633-5980-8189-ed80d6266cbc
PMC6947904	A pre-existing population of ZEB2+ quiescent cells with stemness and mesenchymal features dictate chemoresistance in colorectal cancer	13046_2019_1505_MOESM7_ESM.xlsx	Wilcox_PKH26--Table_S6_RPPA_endpoints	significant endpoints modulated in PKH26+ and PKH26− cells (shown in detail in Additional file **7**) Additional file 7: Table S6. RPPA endpoints	67	10	2.55104	0.00531117	0.0494202	a5a497d3-87e4-584c-8aaa-bb75c4a7415f
PMC6962381	Chronic IL-1β-induced inflammation regulates epithelial-to-mesenchymal transition memory phenotypes via epigenetic modifications in non-small cell lung cancer	41598_2019_57285_MOESM2_ESM.xlsx	Table_S1-GeneSymbol	Dataset 2	625	78	2.13308	1.27757e-10	9.58639e-09	4c08ebcf-eeee-5f78-89aa-412e8255d209
PMC6970952	Time-Course Transcriptome Analysis of Gingiva-Derived Mesenchymal Stem Cells Reveals That Fusobacterium nucleatum Triggers Oncogene Expression in the Process of Cell Differentiation	Table_2.XLSX	Supplementary_Table_S2_790genes-Gene_symbol	addition to this, 790 significant time-course DEGs were identified and divided into nine clusters (**Supplementary Table S2**) The gene symbols of all 790 DEGs Click here for additional data file	788	78	1.69185	2.69556e-06	7.88483e-05	94f4bea1-5abb-50a5-a376-80c2584224a0
PMC7008090	A large peptidome dataset improves HLA class I epitope prediction across most of the human population	NIHMS1541512-supplement-Sup_Tab4.xlsx	IFN_response-Gene	we observed an increase of 2.4–5.6% in peptides derived from IFNγ-response genes post stimulation (**Supplementary Table 4**)	200	27	2.30742	4.14181e-05	0.000877629	306584cc-9f04-555c-9c59-87523724e2a6
PMC7017577	Potential biomarkers of ductal carcinoma in situ progression	12885_2020_6608_MOESM1_ESM.xls	Table_S1-Table_S1_Comparison_between_control_and_pure_invasive_ductal_carcinoma_Differentially_expressed_genes_are_in_bold	Eleven comparisons were made two-by-two to obtain the DEGs (p-value ≤0.0**1**) Additional file 1: Table S1. Comparison between control and pure invasive ductal carcinoma. Differentially expressed genes are in bold. Table S2. Comparison between control and pure ductal carcinoma in situ. Differentially expressed genes are in bold. Table S3. Comparison between pure carcinoma ductal in situ and pure …	770	87	1.93117	1.64968e-09	9.96217e-08	127a715c-6fa2-52bf-a568-f09f220c95b5
PMC7017577	Potential biomarkers of ductal carcinoma in situ progression	12885_2020_6608_MOESM1_ESM.xls	Table_S2-Table_S2_Comparison_between_control_and_pure_ductal_carcinoma_in_situ_Differentially_expressed_genes_are_in_bold	Eleven comparisons were made two-by-two to obtain the DEGs (p-value ≤0.0**1**) Additional file 1: Table S1. Comparison between control and pure invasive ductal carcinoma. Differentially expressed genes are in bold. Table S2. Comparison between control and pure ductal carcinoma in situ. Differentially expressed genes are in bold. Table S3. Comparison between pure carcinoma ductal in situ and pure …	770	87	1.93117	1.64968e-09	9.96217e-08	127a715c-6fa2-52bf-a568-f09f220c95b5
PMC7017577	Potential biomarkers of ductal carcinoma in situ progression	12885_2020_6608_MOESM1_ESM.xls	Table_S3-Table_S3_Comparison_between_pure_carcinoma_ductal_in_situ_and_pure_invasive_ductal_carcinoma_Differentially_expressed_genes_are_in_bold	Eleven comparisons were made two-by-two to obtain the DEGs (p-value ≤0.0**1**) Additional file 1: Table S1. Comparison between control and pure invasive ductal carcinoma. Differentially expressed genes are in bold. Table S2. Comparison between control and pure ductal carcinoma in situ. Differentially expressed genes are in bold. Table S3. Comparison between pure carcinoma ductal in situ and pure …	770	87	1.93117	1.64968e-09	9.96217e-08	127a715c-6fa2-52bf-a568-f09f220c95b5
PMC7017577	Potential biomarkers of ductal carcinoma in situ progression	12885_2020_6608_MOESM1_ESM.xls	Table_S4-Table_S4_Comparison_between_invasive_ductal_carcinoma_of_mixed_lesions_and_pure_invasive_ductal_carcinoma_Differentially_expressed_genes_are_in_bold	Eleven comparisons were made two-by-two to obtain the DEGs (p-value ≤0.0**1**) Additional file 1: Table S1. Comparison between control and pure invasive ductal carcinoma. Differentially expressed genes are in bold. Table S2. Comparison between control and pure ductal carcinoma in situ. Differentially expressed genes are in bold. Table S3. Comparison between pure carcinoma ductal in situ and pure …	770	87	1.93117	1.64968e-09	9.96217e-08	127a715c-6fa2-52bf-a568-f09f220c95b5
PMC7017577	Potential biomarkers of ductal carcinoma in situ progression	12885_2020_6608_MOESM1_ESM.xls	Table_S5-Table_S5_Comparison_between_ductal_carcinoma_in_situ_of_mixed_lesions_and_pure_invasive_ductal_carcinoma_Differentially_expressed_genes_are_in_bold	Eleven comparisons were made two-by-two to obtain the DEGs (p-value ≤0.0**1**) Additional file 1: Table S1. Comparison between control and pure invasive ductal carcinoma. Differentially expressed genes are in bold. Table S2. Comparison between control and pure ductal carcinoma in situ. Differentially expressed genes are in bold. Table S3. Comparison between pure carcinoma ductal in situ and pure …	770	87	1.93117	1.64968e-09	9.96217e-08	127a715c-6fa2-52bf-a568-f09f220c95b5
PMC7017577	Potential biomarkers of ductal carcinoma in situ progression	12885_2020_6608_MOESM1_ESM.xls	Table_S6-Table_S6_Comparison_between_pure_ductal_carcinoma_in_situ_and_ductal_carcinoma_in_situ_of_mixed_lesions_Differentially_expressed_genes_are_in_bold	Eleven comparisons were made two-by-two to obtain the DEGs (p-value ≤0.0**1**) Additional file 1: Table S1. Comparison between control and pure invasive ductal carcinoma. Differentially expressed genes are in bold. Table S2. Comparison between control and pure ductal carcinoma in situ. Differentially expressed genes are in bold. Table S3. Comparison between pure carcinoma ductal in situ and pure …	770	87	1.93117	1.64968e-09	9.96217e-08	127a715c-6fa2-52bf-a568-f09f220c95b5
PMC7017577	Potential biomarkers of ductal carcinoma in situ progression	12885_2020_6608_MOESM1_ESM.xls	Table_S7-Table_S7_Comparison_between_pure_ductal_carcinoma_in_situ_and_invasive_ductal_carcinoma_of_mixed_lesions_Differentially_expressed_genes_are_in_bold	Eleven comparisons were made two-by-two to obtain the DEGs (p-value ≤0.0**1**) Additional file 1: Table S1. Comparison between control and pure invasive ductal carcinoma. Differentially expressed genes are in bold. Table S2. Comparison between control and pure ductal carcinoma in situ. Differentially expressed genes are in bold. Table S3. Comparison between pure carcinoma ductal in situ and pure …	770	87	1.93117	1.64968e-09	9.96217e-08	127a715c-6fa2-52bf-a568-f09f220c95b5
PMC7017577	Potential biomarkers of ductal carcinoma in situ progression	12885_2020_6608_MOESM1_ESM.xls	Table_S8-Table_S8_Comparison_between_control_and_ductal_carcinoma_in_situ_of_mixed_lesions_Differentially_expressed_genes_are_in_bold	Eleven comparisons were made two-by-two to obtain the DEGs (p-value ≤0.0**1**) Additional file 1: Table S1. Comparison between control and pure invasive ductal carcinoma. Differentially expressed genes are in bold. Table S2. Comparison between control and pure ductal carcinoma in situ. Differentially expressed genes are in bold. Table S3. Comparison between pure carcinoma ductal in situ and pure …	770	87	1.93117	1.64968e-09	9.96217e-08	127a715c-6fa2-52bf-a568-f09f220c95b5
PMC7017577	Potential biomarkers of ductal carcinoma in situ progression	12885_2020_6608_MOESM1_ESM.xls	Table_S10-Table_S10_Comparison_between_control_and_invasive_ductal_carcinoma_of_mixed_lesions_Differentially_expressed_genes_are_in_bold	Eleven comparisons were made two-by-two to obtain the DEGs (p-value ≤0.0**1**) Additional file 1: Table S1. Comparison between control and pure invasive ductal carcinoma. Differentially expressed genes are in bold. Table S2. Comparison between control and pure ductal carcinoma in situ. Differentially expressed genes are in bold. Table S3. Comparison between pure carcinoma ductal in situ and pure …	770	87	1.93117	1.64968e-09	9.96217e-08	127a715c-6fa2-52bf-a568-f09f220c95b5
PMC7048625	Classification of primary liver cancer with immunosuppression mechanisms and correlation with genomic alterations	mmc2.xlsx	Sheet1-Unnamed_5		97	13	2.29068	0.00417852	0.0407537	a63e2858-8085-5347-940a-825fb4396fbd
PMC7060278	Transcriptomic and computational analysis identified LPA metabolism, KLHL14 and KCNE3 as novel regulators of Epithelial-Mesenchymal Transition	41598_2020_61017_MOESM3_ESM.xlsx	eAEC-Unnamed_1	of 495 and 753 DEGs were over-expressed in mAEC and eAEC, respectively (Supplementary Dataset **S2**) Dataset S2	632	64	1.73083	1.08589e-05	0.000271864	05655409-d9ac-5ff0-a21f-aa200008d9ec
PMC7060278	Transcriptomic and computational analysis identified LPA metabolism, KLHL14 and KCNE3 as novel regulators of Epithelial-Mesenchymal Transition	41598_2020_61017_MOESM4_ESM.xlsx	eAEC_hub-Unnamed_1	those node highly connected36, were found in MC_mAEC and in MC_eAEC, respectively (Supplementary Dataset **S3**) Dataset S3	174	20	1.9646	0.00293037	0.0310405	d43a9bf0-9ce8-50a4-9c04-0658527c6ecb
PMC7067748	LOXL2 Expression Status Is Correlated With Molecular Characterizations of Cervical Carcinoma and Associated With Poor Cancer Survival via Epithelial-Mesenchymal Transition (EMT) Phenotype	Table_1.xls	Table_S8-Input_ID	Integrated analyses were performed on a subset of 176 samples (the core-set) (**Supplementary Table 1**) Click here for additional data file	1046	108	1.76814	2.38316e-09	1.39377e-07	6e220ae4-e0f1-5292-b9b2-53c7b074ebd4
PMC7067748	LOXL2 Expression Status Is Correlated With Molecular Characterizations of Cervical Carcinoma and Associated With Poor Cancer Survival via Epithelial-Mesenchymal Transition (EMT) Phenotype	Table_1.xls	Table_S8-Gene_Symbol	Integrated analyses were performed on a subset of 176 samples (the core-set) (**Supplementary Table 1**) Click here for additional data file	1046	108	1.76476	2.65013e-09	1.53699e-07	d27450bf-fb6b-53f3-9107-208381c541dd
PMC7072412	Fibroblasts from the Human Skin Dermo-Hypodermal Junction are Distinct from Dermal Papillary and Reticular Fibroblasts and from Mesenchymal Stem Cells and Exhibit a Specific Molecular Profile Related to Extracellular Matrix Organization and Modeling	cells-09-00368.nxml	UP_in_MSCs	secreted factor transcripts, in which their levels distinguish fibroblasts from MSCs (Figure 7C,D and **Table 4**) Transcripts related to the tissue skeleton, in which differential expressions distinguish the “fibroblast” and mesenchymal stem cell or “MSC” groups. This transcript list was extracted from microarray data using fold-change >2 and p < 0.05 as inclusion parameters. The transcript sign…	277	33	2.03623	7.88448e-05	0.00153343	f4bec629-29ec-5d16-be69-3ac473d2b17b
PMC7076123	Integrative Analysis of Breast Cancer Cells Reveals an Epithelial-Mesenchymal Transition Role in Adaptation to Acidic Microenvironment	Data_Sheet_2.xlsx	Supplementary_Table_1-Unnamed_7	used. Log2 fold change of differentially expressed genes associated in the gene regulatory network (**Supplementary Table 1**) Click here for additional data file	1323	103	1.33067	0.00123169	0.0155143	8d36c23d-2dae-5d96-b3b8-c194fb14f972
PMC7080988	A Computational Model of the Endothelial to Mesenchymal Transition	fgene-11-00040.nxml	Molecule	references we used to define each component of the update rule are specified in **Table 1** References that serve as a base for each component of the update ruleAP1CTNNBDLL4ETS1FGF2FLI1GATA2HIF1aLEF1NFκBNOTCHNRARPNRP1PDGF_ABSMAD1SMAD2SMAD6SNAI1SNAI2STAT3TGFBTGFBRTWIST1VEGFAVEGFR2WNT5bWNT7aZEB1ZEB2	22	6	4.66145	0.00130859	0.0162466	7b90541c-e361-5803-8815-fec6e428c98f
PMC7100584	Comparative Study of Transcriptomics-Based Scoring Metrics for the Epithelial-Hybrid-Mesenchymal Spectrum	Table_1.xlsx	S3-Gene_name	variable tumor types (Figure 6D), suggesting hybrid E/M phenotypes contribute maximally to E–M heterogeneity (**Supplementary Table S9**) Abundance of hybrid E/M samples in different tumor types Click here for additional data file	309	31	1.71473	0.00234238	0.0258952	c23139be-2412-5cf7-9f3f-122a4a31232a
PMC7113608	RNA-seq data analysis of stimulated hepatocellular carcinoma cells treated with epigallocatechin gallate and fisetin reveals target genes and action mechanisms	mmc1.xlsx	S6_-_Transcription_Factors-TF		1609	136	1.44469	3.47613e-06	9.8871e-05	b94103e7-6fb5-5429-8416-113e251632f8
PMC7132901	Single-cell RNA-seq highlights heterogeneity in human primary Wharton’s jelly mesenchymal stem/stromal cells cultured in vitro	13287_2020_1660_MOESM2_ESM.xlsx	Table_S4-Table_S4_List_of_HVGs_identified_in_WJMSCs	Using the marker genes listed in (Additional file **2**) Additional file 2: Supplemental tables with six tables. Table S1. Marker genes used for potency score analysis. Table S2. Top100 CD genes ranked by mean expression in WJMSCs and ADMSCs. Table S3. CD genes ranked by percentage of cells expressed the genes (at least one UMI). Table S4. List of HVGs identified in WJMSCs. Table S5. DEGs in each…	721	65	1.54089	0.000294987	0.00472366	720b2db5-e97a-5e15-aedc-30ecf2e3140c
PMC7132901	Single-cell RNA-seq highlights heterogeneity in human primary Wharton’s jelly mesenchymal stem/stromal cells cultured in vitro	13287_2020_1660_MOESM2_ESM.xlsx	Table_S4-Unnamed_1	Using the marker genes listed in (Additional file **2**) Additional file 2: Supplemental tables with six tables. Table S1. Marker genes used for potency score analysis. Table S2. Top100 CD genes ranked by mean expression in WJMSCs and ADMSCs. Table S3. CD genes ranked by percentage of cells expressed the genes (at least one UMI). Table S4. List of HVGs identified in WJMSCs. Table S5. DEGs in each…	727	65	1.52817	0.000369409	0.00572165	1c3a335c-a451-5ca5-b30c-5016c572b231
PMC7162552	MAGIC: A tool for predicting transcription factors and cofactors driving gene sets using ENCODE data	pcbi.1007800.s009.txt	CHEA3_Mean_Rank	so that unity represents the best rank and zero the poorest. Fig 1 and S5–**S8** FOS interactors and rank-ordered algorithm outputs for DGC(Quiet_vs_Reactive).The first column contains proteins associated with FOS extracted from the STRING database with a Combined Score>300. Subsequent columns contain ordered lists of Factors predicted to target the input list by the varous algorithms and associa…	1609	136	1.44469	3.47613e-06	9.8871e-05	b94103e7-6fb5-5429-8416-113e251632f8
PMC7162552	MAGIC: A tool for predicting transcription factors and cofactors driving gene sets using ENCODE data	pcbi.1007800.s009.txt	CHEA3_Top_Rank	so that unity represents the best rank and zero the poorest. Fig 1 and S5–**S8** FOS interactors and rank-ordered algorithm outputs for DGC(Quiet_vs_Reactive).The first column contains proteins associated with FOS extracted from the STRING database with a Combined Score>300. Subsequent columns contain ordered lists of Factors predicted to target the input list by the varous algorithms and associa…	1609	136	1.44469	3.47613e-06	9.8871e-05	b94103e7-6fb5-5429-8416-113e251632f8
PMC7162552	MAGIC: A tool for predicting transcription factors and cofactors driving gene sets using ENCODE data	pcbi.1007800.s006.txt	Mean_Rank	so that unity represents the best rank and zero the poorest. Fig 1 and **S5** REST interactors and rank-ordered algorithm outputs for MCF7(shCon_vs_shREST).The first column contains proteins associated with REST extracted from the STRING database with a Combined Score>300. Subsequent columns contain ordered lists of Factors predicted to target the input list by the varous algorithms and associate…	1609	136	1.44469	3.47613e-06	9.8871e-05	b94103e7-6fb5-5429-8416-113e251632f8
PMC7162552	MAGIC: A tool for predicting transcription factors and cofactors driving gene sets using ENCODE data	pcbi.1007800.s006.txt	Top_Rank	so that unity represents the best rank and zero the poorest. Fig 1 and **S5** REST interactors and rank-ordered algorithm outputs for MCF7(shCon_vs_shREST).The first column contains proteins associated with REST extracted from the STRING database with a Combined Score>300. Subsequent columns contain ordered lists of Factors predicted to target the input list by the varous algorithms and associate…	1609	136	1.44469	3.47613e-06	9.8871e-05	b94103e7-6fb5-5429-8416-113e251632f8
PMC7162552	MAGIC: A tool for predicting transcription factors and cofactors driving gene sets using ENCODE data	pcbi.1007800.s007.txt	Mean_Rank	Estrogen Receptor alpha (ESR1) interactors and rank-ordered algorithm outputs for TCGA(Lum_vs_Basal).The first column contains proteins associated with ESR1 extracted from the STRING database with a Combined Score>300. Subsequent columns contain ordered lists of Factors predicted to target the input list by the varous algorithms and associated libraries.(TXT) Click here for additional data file	1609	136	1.44469	3.47613e-06	9.8871e-05	b94103e7-6fb5-5429-8416-113e251632f8
PMC7162552	MAGIC: A tool for predicting transcription factors and cofactors driving gene sets using ENCODE data	pcbi.1007800.s007.txt	Top_Rank	Estrogen Receptor alpha (ESR1) interactors and rank-ordered algorithm outputs for TCGA(Lum_vs_Basal).The first column contains proteins associated with ESR1 extracted from the STRING database with a Combined Score>300. Subsequent columns contain ordered lists of Factors predicted to target the input list by the varous algorithms and associated libraries.(TXT) Click here for additional data file	1609	136	1.44469	3.47613e-06	9.8871e-05	b94103e7-6fb5-5429-8416-113e251632f8
PMC7162552	MAGIC: A tool for predicting transcription factors and cofactors driving gene sets using ENCODE data	pcbi.1007800.s008.txt	Mean_Rank	REST in MCF7(shCon_vs_shREST) (S5 Table), ESR1 in TCGA(Lum_vs_Basal) (S5 Table), and CTCF in Brain(WT_vs_CTCFko) (**S7 Table**) CTCF interactors and rank-ordered algorithm outputs for Brain(WT_vs_CTCFko).The first column contains proteins associated with CTCF extracted from the STRING database with a Combined Score>300. Subsequent columns contain ordered lists of Factors predicted to target the i…	1609	136	1.44469	3.47613e-06	9.8871e-05	b94103e7-6fb5-5429-8416-113e251632f8
PMC7162552	MAGIC: A tool for predicting transcription factors and cofactors driving gene sets using ENCODE data	pcbi.1007800.s008.txt	Top_Rank	REST in MCF7(shCon_vs_shREST) (S5 Table), ESR1 in TCGA(Lum_vs_Basal) (S5 Table), and CTCF in Brain(WT_vs_CTCFko) (**S7 Table**) CTCF interactors and rank-ordered algorithm outputs for Brain(WT_vs_CTCFko).The first column contains proteins associated with CTCF extracted from the STRING database with a Combined Score>300. Subsequent columns contain ordered lists of Factors predicted to target the i…	1609	136	1.44469	3.47613e-06	9.8871e-05	b94103e7-6fb5-5429-8416-113e251632f8
PMC7247169	Effects of cryopreservation and long-term culture on biological characteristics and proteomic profiles of human umbilical cord-derived mesenchymal stem cells	12014_2020_9279_MOESM1_ESM.xls	P4N48_vs_P10N48-Gene_name	technology for long-term storage of cells by cooling the cells to cryogenic temperatures (− **1**) Additional file 1: Table S1. The raw data of pathways and differentially expressed proteins enriched in KEGG database among the eight groups	76	12	2.69873	0.00144584	0.0176116	a3ae7f8e-cde3-52a7-986d-a2afd070ec91
PMC7262912	rBC2LCN lectin as a potential probe of early‐stage HER2‐positive breast carcinoma	FEB4-10-1056-s002.xlsx	Table_S4-Unnamed_3	and conditions of the cell lines used in this study are shown in Table **S1** Table S1. Cell culture. Table S2. List of DNA microarray data. Table S3. Comprehensive expression analysis and comparison between rBC2LCN‐positive and rBC2LCN‐negative cell lines (P ≤ 0.05, FC ≥ 2). Table S4. Comprehensive expression analysis and comparison between rBC2LCN‐positive and rBC2LCN‐negative cell lines (P ≤ 0…	1735	160	1.57894	9.23486e-10	5.85264e-08	8347dab4-df6d-5da0-a4de-3eb2c5dc63c7
PMC7262912	rBC2LCN lectin as a potential probe of early‐stage HER2‐positive breast carcinoma	FEB4-10-1056-s002.xlsx	Table_S3-Unnamed_3	and conditions of the cell lines used in this study are shown in Table **S1** Table S1. Cell culture. Table S2. List of DNA microarray data. Table S3. Comprehensive expression analysis and comparison between rBC2LCN‐positive and rBC2LCN‐negative cell lines (P ≤ 0.05, FC ≥ 2). Table S4. Comprehensive expression analysis and comparison between rBC2LCN‐positive and rBC2LCN‐negative cell lines (P ≤ 0…	1591	117	1.25692	0.00394463	0.0391193	204b0d1c-94e6-5f46-8e25-e70a1f0e2779
PMC7263508	Consensus transcriptional regulatory networks of coronavirus-infected human cells	media-1.xlsx	Section_11-Section_11_Literature-curated_epithelial_to_mesenchymal_transition_genes	points in 156 experiments from 38 independent viral infection transcriptomic datasets (figshare File F1, **section 1**)	337	36	1.82585	0.000341874	0.00535155	f31d4719-1209-53cf-8c2d-181f49dab9e1
PMC7307565	Alveolar soft-part sarcoma (ASPS) resembles a mesenchymal stromal progenitor: evidence from meta-analysis of transcriptomic data	peerj-08-9394-s004.xlsx	ASPS-1_vs_NCI_Sarcoma_Panel-Unnamed_6	**Data S3** Raw data from all experiments conducted in this report, extending to concatenation of all data into a single spreadsheet to allow any one gene to be investigated across all analyses Click here for additional data file	981	89	1.55065	1.70985e-05	0.000405652	398436d9-7b94-5585-b0cf-771766bc862e
PMC7307565	Alveolar soft-part sarcoma (ASPS) resembles a mesenchymal stromal progenitor: evidence from meta-analysis of transcriptomic data	peerj-08-9394-s002.xlsx	two_conditions_table-Gene_Symbol	Table 1 list the top fifty transcripts over-expressed in ASPS-1 relative to the average (**Data S1**) Raw data for ASPS-1 expression relative to the average of all samples in the NCI sarcoma cell line dataset (2 fold cut-off) Click here for additional data file	981	89	1.55065	1.70985e-05	0.000405652	398436d9-7b94-5585-b0cf-771766bc862e
PMC7307565	Alveolar soft-part sarcoma (ASPS) resembles a mesenchymal stromal progenitor: evidence from meta-analysis of transcriptomic data	peerj-08-9394-s003.xlsx	Sheet1-Gene_Symbol	The raw data are available in Data S1–**S3** Raw data from surfaceome analysis of ASPS-1 Click here for additional data file	2255	160	1.21273	0.00283011	0.0301862	d2fe03d8-ad96-5b40-8ccd-14e9fdd51a3f
PMC7316346	EBNA2-deleted Epstein-Barr virus (EBV) isolate, P3HR1, causes Hodgkin-like lymphomas and diffuse large B cell lymphomas with type II and Wp-restricted latency types in humanized mice	ppat.1008590.s008.xlsx	D_GO_EXTRACELLULAR_MATRIX-Unnamed_1	Fig 11A, Table A and B in **S2 Table** Gene profiles in listed GSEA plots.A. “Go_T_cell receptor _complex”. B. “Go_T_cell receptor _complex”. C. “Hallmark_epithelial-mesenchymal_transition”. D. “Go extracellular matrix component”.(XLSX) Click here for additional data file	62	11	3.03245	0.000841369	0.0113333	23ad9252-cb6b-5307-84e0-f9f079b6734a
PMC7327915	Extended in vitro culture of primary human mesenchymal stem cells downregulates Brca1‐related genes and impairs DNA double‐strand break recognition	FEB4-10-1238-s006.csv	SYMBOL	clustered together before in vitro aging and formed a second cluster after aging (Fig. **S1**) Data S1. List of the differentially expressed genes from dataset GSE59966 by their log2‐FC values Click here for additional data file	1244	125	1.71744	6.66651e-10	4.33206e-08	c0207d29-ea1a-5649-819d-cbd1aec0ad14
PMC7338441	Activating PIK3CA mutation promotes osteogenesis of bone marrow mesenchymal stem cells in macrodactyly	41419_2020_2723_MOESM3_ESM.docx	0-ABL1	genomic DNA was sheared to an average size of 200 bp using a Covaris **S2** table S2	59	11	3.18664	0.000543765	0.00791108	86fe220a-5e2f-5c43-b05e-8a85b67e369b
PMC7338441	Activating PIK3CA mutation promotes osteogenesis of bone marrow mesenchymal stem cells in macrodactyly	41419_2020_2723_MOESM3_ESM.docx	0-AKT1	genomic DNA was sheared to an average size of 200 bp using a Covaris **S2** table S2	58	10	2.94689	0.00179449	0.0210346	30a929d8-26ae-5305-ab7a-ed0ca65abaf8
PMC7341640	Superior breast cancer metastasis risk stratification using an epithelial-mesenchymal-amoeboid transition gene signature	13058_2020_1304_MOESM8_ESM.xlsx	Ranked_TFs_EMAT2-EMAT2_ranked_list	the expression of 1338 transcription factors (TFs) present in the METABRIC dataset (Supplementary Table S**7**) Additional file 8: Table S7 Differential expression analysis of TFs for each EMAT cluster. The table content is provided as a separate xlsx file. The p-values were obtained using a two-sided t-test and were corrected for multiple hypothesis testing	1329	127	1.63332	1.03831e-08	5.34005e-07	2367411f-e786-5e2f-a47b-402f659d6273
PMC7341640	Superior breast cancer metastasis risk stratification using an epithelial-mesenchymal-amoeboid transition gene signature	13058_2020_1304_MOESM8_ESM.xlsx	Ranked_TFs_EMAT1-EMAT1_ranked_list	the expression of 1338 transcription factors (TFs) present in the METABRIC dataset (Supplementary Table S**7**) Additional file 8: Table S7 Differential expression analysis of TFs for each EMAT cluster. The table content is provided as a separate xlsx file. The p-values were obtained using a two-sided t-test and were corrected for multiple hypothesis testing	1329	127	1.63332	1.03831e-08	5.34005e-07	2367411f-e786-5e2f-a47b-402f659d6273
PMC7341640	Superior breast cancer metastasis risk stratification using an epithelial-mesenchymal-amoeboid transition gene signature	13058_2020_1304_MOESM8_ESM.xlsx	Ranked_TFs_EMAT3-EMAT3_ranked_list	the expression of 1338 transcription factors (TFs) present in the METABRIC dataset (Supplementary Table S**7**) Additional file 8: Table S7 Differential expression analysis of TFs for each EMAT cluster. The table content is provided as a separate xlsx file. The p-values were obtained using a two-sided t-test and were corrected for multiple hypothesis testing	1329	127	1.63332	1.03831e-08	5.34005e-07	2367411f-e786-5e2f-a47b-402f659d6273
PMC7341640	Superior breast cancer metastasis risk stratification using an epithelial-mesenchymal-amoeboid transition gene signature	13058_2020_1304_MOESM8_ESM.xlsx	Ranked_TFs_EMAT4-EMAT4_ranked_list	the expression of 1338 transcription factors (TFs) present in the METABRIC dataset (Supplementary Table S**7**) Additional file 8: Table S7 Differential expression analysis of TFs for each EMAT cluster. The table content is provided as a separate xlsx file. The p-values were obtained using a two-sided t-test and were corrected for multiple hypothesis testing	1329	127	1.63332	1.03831e-08	5.34005e-07	2367411f-e786-5e2f-a47b-402f659d6273
PMC7341640	Superior breast cancer metastasis risk stratification using an epithelial-mesenchymal-amoeboid transition gene signature	13058_2020_1304_MOESM8_ESM.xlsx	Ranked_TFs_EMAT4-Ranked_list_underexpressed	the expression of 1338 transcription factors (TFs) present in the METABRIC dataset (Supplementary Table S**7**) Additional file 8: Table S7 Differential expression analysis of TFs for each EMAT cluster. The table content is provided as a separate xlsx file. The p-values were obtained using a two-sided t-test and were corrected for multiple hypothesis testing	49	10	3.48816	0.000455121	0.00680253	d41f5278-5a45-56e7-bde1-e9a2ad002982
PMC7341640	Superior breast cancer metastasis risk stratification using an epithelial-mesenchymal-amoeboid transition gene signature	13058_2020_1304_MOESM8_ESM.xlsx	Ranked_TFs_EMAT1-Ranked_list_underexpressed	the expression of 1338 transcription factors (TFs) present in the METABRIC dataset (Supplementary Table S**7**) Additional file 8: Table S7 Differential expression analysis of TFs for each EMAT cluster. The table content is provided as a separate xlsx file. The p-values were obtained using a two-sided t-test and were corrected for multiple hypothesis testing	50	9	3.07656	0.00220766	0.0247192	1d15b8c8-81cb-5974-a0ec-dd577f1ca509
PMC7353702	lncRNA HOTAIR overexpression induced downregulation of c-Met signaling promotes hybrid epithelial/mesenchymal phenotype in hepatocellular carcinoma cells	12964_2020_602_MOESM2_ESM.docx	0-HOTAIR	normalize relative expression of the genes. Primers targeting mRNAs of interest were listed in **Supplementary Document 1** Additional file 2: Supplementary document 1. Includes primer sequences used in gene expression analysis and catalog numbers of antibodies used in immunoblotting and/or immunofluorescent labeling experiments	9	4	7.59644	0.00115654	0.0147021	e179c205-a5e1-502e-9bf2-5ffb16c5944d
PMC7365136	Bioinformatics analysis and identification of circular RNAs promoting the osteogenic differentiation of human bone marrow mesenchymal stem cells on titanium treated by surface mechanical attrition	peerj-08-9292-s018.xlsx	Sheet1-genesymbol	Predicted ceRNA Click here for additional data file	506	55	1.85782	6.11605e-06	0.000163522	e2b2c199-1e1c-570d-bfa7-fbcd9f0fe06b
PMC7378217	Intrinsic transcriptomic sex differences in human endothelial cells at birth and in adults are associated with coronary artery disease targets	41598_2020_69451_MOESM1_ESM.xlsx	Combined_sex_hormone_geneset-Estrogen_response_early	as exemplified by the differential skewing of p-values in the groups of twins (Fig. **2**) Supplementary Data File	200	23	1.96558	0.00147383	0.017908	a66ee8d0-6d6f-575d-930b-53f3f3733ffe
PMC7425605	Metabolic syndrome increases senescence-associated micro-RNAs in extracellular vesicles derived from swine and human mesenchymal stem/stromal cells	12964_2020_624_MOESM4_ESM.docx	0-CDK6	SA-genes. The common dysregulated miRNAs targeted SA genes are listed in Supplementary Material (Table **3s**) Additional file 3: Table S3	9	4	7.59644	0.00115654	0.0147021	6a778f18-7f84-5182-94a4-dece030ea726
PMC7425605	Metabolic syndrome increases senescence-associated micro-RNAs in extracellular vesicles derived from swine and human mesenchymal stem/stromal cells	12964_2020_624_MOESM2_ESM.docx	0-ETS1	(Fig. 1c). The SA-genes targeted by dysregulated miRNAs are detailed in Supplementary Material (Table **1s**) Additional file 1: Table S1	16	5	5.34124	0.00172139	0.0203267	cf4807f0-f3e6-570b-99d2-53d2157923b2
PMC7425605	Metabolic syndrome increases senescence-associated micro-RNAs in extracellular vesicles derived from swine and human mesenchymal stem/stromal cells	12964_2020_624_MOESM3_ESM.docx	0-CDK4	by dysregulated miRNAs in human subjects with MetS are listed in Supplementary Material (Table **2s**) Additional file 2: Table S2	19	5	4.49789	0.00395797	0.0391193	8d01e0bd-5086-5d12-b742-2da5ed6d8779
PMC7426315	Direct conversion of human fibroblasts into therapeutically active vascular wall-typical mesenchymal stem cells	18_2019_3358_MOESM2_ESM.xlsx	Table_S4-Unnamed_0	Supplementary material 2 (XLSX 42 kb)	79	13	2.8126	0.000622884	0.00882337	3bfcaa7d-4ff1-507e-aeae-8ae61da3e3ef
PMC7426315	Direct conversion of human fibroblasts into therapeutically active vascular wall-typical mesenchymal stem cells	18_2019_3358_MOESM2_ESM.xlsx	Table_S4-Unnamed_23	Supplementary material 2 (XLSX 42 kb)	53	9	2.90241	0.00333877	0.0343687	7076359a-e1e9-5e21-b8e0-1e69cd7a5b6a
PMC7439444	Single-cell RNA sequencing reveals profibrotic roles of distinct epithelial and mesenchymal lineages in pulmonary fibrosis	aba1972_Table_S10.txt	receptor	aba1972_Table_S10.txt	197	32	2.77636	1.32932e-07	5.30176e-06	111b4200-22ca-58c0-b71f-d08797180f86
PMC7439444	Single-cell RNA sequencing reveals profibrotic roles of distinct epithelial and mesenchymal lineages in pulmonary fibrosis	aba1972_Table_S10.txt	ligand	aba1972_Table_S10.txt	260	29	1.90641	0.000629249	0.00889958	d2373132-0b19-5fcc-b839-12ef5d489371
PMC7439613	ARID1A loss in neuroblastoma promotes the adrenergic-to-mesenchymal transition by regulating enhancer-mediated gene expression	aaz3440_Data_file_S2.xlsx	S2B_PBAF_binding_sites-associated_gene	aaz3440_Data_file_S2.xlsx	2127	217	1.74457	4.69772e-18	1.18741e-15	cb728494-efe3-5b9d-a474-b3ad04bc0ba7
PMC7439613	ARID1A loss in neuroblastoma promotes the adrenergic-to-mesenchymal transition by regulating enhancer-mediated gene expression	aaz3440_Data_file_S2.xlsx	S2A_BAF_binding_sites-associated_gene	aaz3440_Data_file_S2.xlsx	1509	151	1.71147	9.36972e-12	8.6212e-10	fccd292d-597c-55c4-8845-1687c27caa83
PMC7445411	High‐efficient generation of VCAM‐1+ mesenchymal stem cells with multidimensional superiorities in signatures and efficacy on aplastic anaemia mice	CPR-53-e12862-s006.xlsx	Sheet1-Supplementary_Table_S4_Gene_expression_profiling_of_NT-MSC_and_III-MSC	III‐MSCs whereas no distinct tendency in cell cycle‐ and apoptosis‐associated genes (Figure 3A; Table **S4**) Table S4 Click here for additional data file	1333	157	2.01308	2.31795e-18	6.14562e-16	54a47820-73fc-5fb2-8805-92fa6c98d798
PMC7445411	High‐efficient generation of VCAM‐1+ mesenchymal stem cells with multidimensional superiorities in signatures and efficacy on aplastic anaemia mice	CPR-53-e12862-s006.xlsx	Sheet1-Unnamed_6	III‐MSCs whereas no distinct tendency in cell cycle‐ and apoptosis‐associated genes (Figure 3A; Table **S4**) Table S4 Click here for additional data file	1337	157	2.00706	3.07652e-18	7.98926e-16	0af7bd64-6ecc-5ff4-a5ed-7735142479e3
PMC7507681	Whole-exome sequencing reveals potential mechanisms of drug resistance to FGFR3-TACC3 targeted therapy and subsequent drug selection: towards a personalized medicine	12920_2020_794_MOESM7_ESM.docx	0-Gene	activation, and pathway-independent mechanisms such as tumor microenvironment, epithelial-mesenchymal transition (EMT) or epigenetic modulation [**2**] Additional file 7: Table S2. SNAP2 analysis to predict the protein function alteration of the mutations in post-TKI resistance	49	12	4.18579	1.84253e-05	0.000432516	3fb942a4-b5a2-5dc4-867d-4b7f89bf8223
PMC7509080	Epigenetic regulation of miR-29a/miR-30c/DNMT3A axis controls SOD2 and mitochondrial oxidative stress in human mesenchymal stem cells	mmc2.xlsx	Sheet1-Unnamed_1	Multimedia component 2	62	11	3.03245	0.000841369	0.0113333	99f715d7-7b41-5396-bd33-404cb70cb714
PMC7510303	Peptidome analysis of umbilical cord mesenchymal stem cell (hUC-MSC) conditioned medium from preterm and term infants	13287_2020_Article_1931.nxml	Gene	We verified the protein integrity of the hUC-MSC CM by silver staining (Fig. S**2**) Differentially expressed peptides in hUC-MSC conditioned medium from preterm and term infantsPODNL1TTNALOXE3SPEGSIX5TSC2CDHR1MUC19ATN1SNTB2SCN8ACROCCTACC2KLF14SEC16ASPHK2ADGRV1HECTD4PDE4DIPFOXK2CRB2DENND2ACOL4A4PIGRAHNAKLONP1KMT2CMYCBP2PRR36ADRA2AMAGEL2GRIPAP1FCHO1EPAS1FGD5SARGZSWIM8SKOR2PCLOCHATSYNE2VCANGRHL3IQC…	102	17	2.84866	8.20561e-05	0.0015873	87c5ab83-847e-5096-8402-666eadd7122c
PMC7510303	Peptidome analysis of umbilical cord mesenchymal stem cell (hUC-MSC) conditioned medium from preterm and term infants	13287_2020_1931_MOESM3_ESM.docx	0-Table_S1_Putative_precursor_proteins_associated_with_diseases	in developmental disorders, and KMT2C, Solute carrier family 2 (SLC2A4), Electrogenic sodium bicarbonate cotransporter **1** Additional file 3: Table S1. Putative precursor proteins associated with diseases	30	7	3.98813	0.00142356	0.0173855	cd67d1b8-1066-51bd-ab0e-f7d7e81d88e8
PMC7518891	SOX11 promotes epithelial/mesenchymal hybrid state and alters tropism of invasive breast cancer cells	elife-58374-supp1.xlsm	Common_in_3D_0_585-Symbol	two time-points: 2 days and 5 days after spheroid formation were sequenced (Figure 3A, **Supplementary file 1**) RNA-seq results when SOX11 is induced in cells grown in 2D, 3D for 2 days or 3D for 5 days	1018	85	1.42713	0.000441352	0.00663082	6ebab358-0273-5599-bb6f-52346d1d90a7
PMC7518891	SOX11 promotes epithelial/mesenchymal hybrid state and alters tropism of invasive breast cancer cells	elife-58374-supp1.xlsm	0_585_3D_2days-Symbol	two time-points: 2 days and 5 days after spheroid formation were sequenced (Figure 3A, **Supplementary file 1**) RNA-seq results when SOX11 is induced in cells grown in 2D, 3D for 2 days or 3D for 5 days	1018	85	1.42713	0.000441352	0.00663082	6ebab358-0273-5599-bb6f-52346d1d90a7
PMC7518891	SOX11 promotes epithelial/mesenchymal hybrid state and alters tropism of invasive breast cancer cells	elife-58374-supp1.xlsm	0_585_3D_2days-Symbol_1	two time-points: 2 days and 5 days after spheroid formation were sequenced (Figure 3A, **Supplementary file 1**) RNA-seq results when SOX11 is induced in cells grown in 2D, 3D for 2 days or 3D for 5 days	1018	85	1.42713	0.000441352	0.00663082	6ebab358-0273-5599-bb6f-52346d1d90a7
PMC7518891	SOX11 promotes epithelial/mesenchymal hybrid state and alters tropism of invasive breast cancer cells	elife-58374-supp1.xlsm	3D_2days-Symbol	two time-points: 2 days and 5 days after spheroid formation were sequenced (Figure 3A, **Supplementary file 1**) RNA-seq results when SOX11 is induced in cells grown in 2D, 3D for 2 days or 3D for 5 days	1018	85	1.42713	0.000441352	0.00663082	6ebab358-0273-5599-bb6f-52346d1d90a7
PMC7518891	SOX11 promotes epithelial/mesenchymal hybrid state and alters tropism of invasive breast cancer cells	elife-58374-supp1.xlsm	2D-Symbol	two time-points: 2 days and 5 days after spheroid formation were sequenced (Figure 3A, **Supplementary file 1**) RNA-seq results when SOX11 is induced in cells grown in 2D, 3D for 2 days or 3D for 5 days	632	55	1.48744	0.00189823	0.0219347	2e5c79e5-d90e-5250-8985-b68421fa9e64
PMC7518891	SOX11 promotes epithelial/mesenchymal hybrid state and alters tropism of invasive breast cancer cells	elife-58374-supp1.xlsm	Sheet12-CD14	two time-points: 2 days and 5 days after spheroid formation were sequenced (Figure 3A, **Supplementary file 1**) RNA-seq results when SOX11 is induced in cells grown in 2D, 3D for 2 days or 3D for 5 days	632	55	1.48744	0.00189823	0.0219347	d6b7f7fa-ac1d-53db-bc7b-9f4df8f65d3f
PMC7518891	SOX11 promotes epithelial/mesenchymal hybrid state and alters tropism of invasive breast cancer cells	elife-58374-supp1.xlsm	0_585-Symbol	two time-points: 2 days and 5 days after spheroid formation were sequenced (Figure 3A, **Supplementary file 1**) RNA-seq results when SOX11 is induced in cells grown in 2D, 3D for 2 days or 3D for 5 days	633	55	1.48509	0.00196493	0.0225271	0bde100e-e17a-5f23-84c7-e9da76053326
PMC7518891	SOX11 promotes epithelial/mesenchymal hybrid state and alters tropism of invasive breast cancer cells	elife-58374-supp1.xlsm	0_585-Symbol_1	two time-points: 2 days and 5 days after spheroid formation were sequenced (Figure 3A, **Supplementary file 1**) RNA-seq results when SOX11 is induced in cells grown in 2D, 3D for 2 days or 3D for 5 days	633	55	1.48509	0.00196493	0.0225271	0bde100e-e17a-5f23-84c7-e9da76053326
PMC7518891	SOX11 promotes epithelial/mesenchymal hybrid state and alters tropism of invasive breast cancer cells	elife-58374-supp1.xlsm	Common_in_all_3_datasets_0_585-Symbol	two time-points: 2 days and 5 days after spheroid formation were sequenced (Figure 3A, **Supplementary file 1**) RNA-seq results when SOX11 is induced in cells grown in 2D, 3D for 2 days or 3D for 5 days	633	55	1.48509	0.00196493	0.0225271	0bde100e-e17a-5f23-84c7-e9da76053326
PMC7518891	SOX11 promotes epithelial/mesenchymal hybrid state and alters tropism of invasive breast cancer cells	elife-58374-supp1.xlsm	Sheet12-Symbol	two time-points: 2 days and 5 days after spheroid formation were sequenced (Figure 3A, **Supplementary file 1**) RNA-seq results when SOX11 is induced in cells grown in 2D, 3D for 2 days or 3D for 5 days	633	55	1.48509	0.00196493	0.0225271	0bde100e-e17a-5f23-84c7-e9da76053326
PMC7534337	mRNA and miRNA profiling of Zika virus-infected human umbilical cord mesenchymal stem cells identifies miR-142-5p as an antiviral factor	TEMI_A_1821581_SM9118.docx	0-MR766_48_hpi	Clean_copy_of_supplementary_files.docx Click here for additional data file	20	5	4.273	0.00502658	0.0472164	3a5c330a-c0c7-5d69-a20d-5f728e88e295
PMC7534337	mRNA and miRNA profiling of Zika virus-infected human umbilical cord mesenchymal stem cells identifies miR-142-5p as an antiviral factor	TEMI_A_1821581_SM9118.docx	0-PRVABC59_48_hpi	Clean_copy_of_supplementary_files.docx Click here for additional data file	20	5	4.273	0.00502658	0.0472164	3a5c330a-c0c7-5d69-a20d-5f728e88e295
PMC7534337	mRNA and miRNA profiling of Zika virus-infected human umbilical cord mesenchymal stem cells identifies miR-142-5p as an antiviral factor	TEMI_A_1821581_SM9118.docx	0-MR766_4_hpi	Clean_copy_of_supplementary_files.docx Click here for additional data file	20	5	4.273	0.00502658	0.0472164	f705b11e-715f-5a58-9b4d-ce527eda3e23
PMC7534337	mRNA and miRNA profiling of Zika virus-infected human umbilical cord mesenchymal stem cells identifies miR-142-5p as an antiviral factor	TEMI_A_1821581_SM9118.docx	0-PRVABC59_4_hpi	Clean_copy_of_supplementary_files.docx Click here for additional data file	20	5	4.273	0.00502658	0.0472164	f705b11e-715f-5a58-9b4d-ce527eda3e23
PMC7540996	Neuroblastoma patient‐derived cultures are enriched for a mesenchymal gene signature and reflect individual drug response	CAS-111-3780-s011.xlsx	NanoString_normalized_counts-Unnamed_1	repeated with subsets of genes from the mesenchymal and adrenergic super‐enhancer signatures (see Data **S2**) Data S2 Click here for additional data file	779	87	1.90886	2.90402e-09	1.66944e-07	cc391d37-7ad3-5d43-83b5-707908f4eca0
PMC7576224	Extracellular vesicle‐carried microRNA‐27b derived from mesenchymal stem cells accelerates cutaneous wound healing via E3 ubiquitin ligase ITCH	JCMM-24-11254-s001.xlsx	Supplementary_Table_1-starbase_miRDB_mirDIP_TargetScan	Table S1 Click here for additional data file	336	55	2.79779	2.98679e-12	3.01839e-10	38075ee6-43c2-5727-9395-e50ccfe151df
PMC7576224	Extracellular vesicle‐carried microRNA‐27b derived from mesenchymal stem cells accelerates cutaneous wound healing via E3 ubiquitin ligase ITCH	JCMM-24-11254-s001.xlsx	Supplementary_Table_1-starbase	Table S1 Click here for additional data file	1341	124	1.58047	1.03015e-07	4.21451e-06	b4da3953-d579-5526-8cae-3bfd90b1ace3
PMC7576224	Extracellular vesicle‐carried microRNA‐27b derived from mesenchymal stem cells accelerates cutaneous wound healing via E3 ubiquitin ligase ITCH	JCMM-24-11254-s001.xlsx	Supplementary_Table_1-starbase_TargetScan	Table S1 Click here for additional data file	1150	105	1.56057	2.04606e-06	6.16885e-05	3c1db25b-677b-54ec-b7b7-e714be36b6a6
PMC7576224	Extracellular vesicle‐carried microRNA‐27b derived from mesenchymal stem cells accelerates cutaneous wound healing via E3 ubiquitin ligase ITCH	JCMM-24-11254-s001.xlsx	Supplementary_Table_1-starbase_microRNA_miRDB_mirDIP_TargetScan	Table S1 Click here for additional data file	502	50	1.70239	0.000151478	0.00267988	9f3d08d7-a4b8-561a-a106-59a029e7d510
PMC7576224	Extracellular vesicle‐carried microRNA‐27b derived from mesenchymal stem cells accelerates cutaneous wound healing via E3 ubiquitin ligase ITCH	JCMM-24-11254-s001.xlsx	Supplementary_Table_1-starbase_mirDIP_TargetScan	Table S1 Click here for additional data file	236	27	1.95544	0.000647428	0.00911472	8ba2e1a8-6dbb-531a-88d9-fa7cd8690d93
PMC7576224	Extracellular vesicle‐carried microRNA‐27b derived from mesenchymal stem cells accelerates cutaneous wound healing via E3 ubiquitin ligase ITCH	JCMM-24-11254-s001.xlsx	Supplementary_Table_1-starbase_microRNA_TargetScan	Table S1 Click here for additional data file	187	21	1.91942	0.0030903	0.0323321	ac525607-1827-59e6-90b7-271b46fa31a1
PMC7576224	Extracellular vesicle‐carried microRNA‐27b derived from mesenchymal stem cells accelerates cutaneous wound healing via E3 ubiquitin ligase ITCH	JCMM-24-11254-s001.xlsx	Supplementary_Table_1-starbase_miRDB_TargetScan	Table S1 Click here for additional data file	117	15	2.19128	0.00336476	0.0345982	b4ba94d1-6589-573b-b56f-214be84eb0fd
PMC7576224	Extracellular vesicle‐carried microRNA‐27b derived from mesenchymal stem cells accelerates cutaneous wound healing via E3 ubiquitin ligase ITCH	JCMM-24-11254-s001.xlsx	Supplementary_Table_1-starbase_microRNA_mirDIP_TargetScan	Table S1 Click here for additional data file	154	18	1.99776	0.0038752	0.0386319	46b1bae9-fa9b-52d7-a7c4-6749aa5e6f8e
PMC7594431	Significant transcriptomic changes are associated with differentiation of bone marrow-derived mesenchymal stem cells into neural progenitor-like cells in the presence of bFGF and EGF	13578_2020_487_MOESM3_ESM.xlsx	TF_enrichment-TF	analysis was performed on up- and downregulated genes from different analysis with the Cytoscape v**3** Additional file 3. Detail of all differentially regulated genes and enriched gene ontology ontologies during the differentiation. Significantly enriched GO terms generated from ClueGO plugin for both up and downregulated genes in NPCs. Details of transcription factor enrichment analysis using C…	1609	136	1.44469	3.47613e-06	9.8871e-05	b94103e7-6fb5-5429-8416-113e251632f8
PMC7607169	Genomic profiling of newly diagnosed glioblastoma patients and its potential for clinical utility – a prospective, translational study	MOL2-14-2727-s002.xlsx	Mesenchymal_vs_rest-Gene_Symbol	samples. Noteworthy, a number of DLX genes (DLX1, DLX2, and DLX5; Tables S6 and **S7**) Table S7. Genelist of glioblastoma and chromosome localization Click here for additional data file	1271	120	1.61372	5.57686e-08	2.42687e-06	5be7561a-4141-5b11-ab05-dd435963e60b
PMC7607169	Genomic profiling of newly diagnosed glioblastoma patients and its potential for clinical utility – a prospective, translational study	MOL2-14-2727-s002.xlsx	Cluster_Mesenchymal-Gene_Symbol	samples. Noteworthy, a number of DLX genes (DLX1, DLX2, and DLX5; Tables S6 and **S7**) Table S7. Genelist of glioblastoma and chromosome localization Click here for additional data file	417	38	1.55754	0.00434911	0.042089	4ba6c370-4099-5ee1-a5ae-927231b5b5ee
PMC7684863	Mesenchymal stem cells negatively regulate CD4+ T cell activation in patients with primary Sjögren syndrome through the miRNA-125b and miRNA-155 TCR pathway	Supplementary_Data9.xlsx	miRNA-gene_relation-Unnamed_2	the pSS activation group. ‘TCR signaling pathway’ remained unchanged in the MSC treatment group (**Table SIX**) Supporting Data	850	110	2.2119	1.03465e-15	1.86153e-13	41f595c6-445a-5131-9558-0af63f2ccb42
PMC7684863	Mesenchymal stem cells negatively regulate CD4+ T cell activation in patients with primary Sjögren syndrome through the miRNA-125b and miRNA-155 TCR pathway	Supplementary_Data9.xlsx	miRNA-gene_characteristic-Gene_symbol	the pSS activation group. ‘TCR signaling pathway’ remained unchanged in the MSC treatment group (**Table SIX**) Supporting Data	850	110	2.2119	1.03465e-15	1.86153e-13	41f595c6-445a-5131-9558-0af63f2ccb42
PMC7684863	Mesenchymal stem cells negatively regulate CD4+ T cell activation in patients with primary Sjögren syndrome through the miRNA-125b and miRNA-155 TCR pathway	Supplementary_Data7.xlsx	miRNA-gene_relationship-Gene_symbol	−5096, −5787, −181a-5p, −15a-5p, −148b-3p, −140-3p, −7150 and −3609 participated in ‘TCR signaling pathway’ (**Table SVII**) Supporting Data	1044	112	1.83362	1.34911e-10	1.00704e-08	b2eb9e15-fe13-53eb-8cfc-479397ac867f
PMC7684863	Mesenchymal stem cells negatively regulate CD4+ T cell activation in patients with primary Sjögren syndrome through the miRNA-125b and miRNA-155 TCR pathway	Supplementary_Data7.xlsx	miRNA-gene_characteristic-Gene_symbol	−5096, −5787, −181a-5p, −15a-5p, −148b-3p, −140-3p, −7150 and −3609 participated in ‘TCR signaling pathway’ (**Table SVII**) Supporting Data	1044	112	1.83362	1.34911e-10	1.00704e-08	b2eb9e15-fe13-53eb-8cfc-479397ac867f
PMC7738567	Identification of EMT-Related Gene Signatures to Predict the Prognosis of Patients With Endometrial Cancer	Table_1.XLSX	Sheet1-gene	We downloaded the ERG list from the EMT gene database1 (**Supplementary Table 1**) The ERG list from the epithelial–mesenchymal transition gene database Click here for additional data file	1011	101	1.70751	4.94491e-08	2.17827e-06	cc5ebe44-1870-5bfe-9e36-86a81de98dd4
PMC7755640	Morphological and Molecular Features of Porcine Mesenchymal Stem Cells Derived From Different Types of Synovial Membrane, and Genetic Background of Cell Donors	Table_2.XLSX	FP_-_FS-Table_S2_The_number_of_significant_DEGs_identified_through_a_comparison_between_FP_and_FS_tissue	identified through a comparison between different breeds, tissues, and their interactions is shown in **Supplementary Table 2** The number of significant DEGs identified through a comparison between DL and AS breed, between FP and FS tissue, between FP and FS tissue of DL breed and between FP and FS Click here for additional data file	120	19	2.70623	6.60194e-05	0.00131374	6003dbbe-c13e-590d-9a79-9e84570bb5ee
PMC7755640	Morphological and Molecular Features of Porcine Mesenchymal Stem Cells Derived From Different Types of Synovial Membrane, and Genetic Background of Cell Donors	Table_2.XLSX	AS_-_DL-Table_S2_The_number_of_significant_DEGs_identified_through_a_comparison_between_DL_and_AS_breed	identified through a comparison between different breeds, tissues, and their interactions is shown in **Supplementary Table 2** The number of significant DEGs identified through a comparison between DL and AS breed, between FP and FS tissue, between FP and FS tissue of DL breed and between FP and FS Click here for additional data file	146	21	2.45844	0.000116643	0.00214712	56dd5134-ad72-507b-b642-e6e78c0e9eb4
PMC7755640	Morphological and Molecular Features of Porcine Mesenchymal Stem Cells Derived From Different Types of Synovial Membrane, and Genetic Background of Cell Donors	Table_2.XLSX	DL_FP_-_DL_FS-Table_S2_The_number_of_significant_DEGs_identified_through_a_comparison_between_FP_and_FS_tissue_of_DL_breed	identified through a comparison between different breeds, tissues, and their interactions is shown in **Supplementary Table 2** The number of significant DEGs identified through a comparison between DL and AS breed, between FP and FS tissue, between FP and FS tissue of DL breed and between FP and FS Click here for additional data file	71	12	2.88879	0.000780139	0.0106158	faf0aa16-53c8-5fde-be21-59976d6e027d
PMC7755640	Morphological and Molecular Features of Porcine Mesenchymal Stem Cells Derived From Different Types of Synovial Membrane, and Genetic Background of Cell Donors	Table_2.XLSX	AS_FP_-_AS_FS-Table_S2_The_number_of_significant_DEGs_identified_through_a_comparison_between_FP_and_FS_tissue_of_AS_breed	identified through a comparison between different breeds, tissues, and their interactions is shown in **Supplementary Table 2** The number of significant DEGs identified through a comparison between DL and AS breed, between FP and FS tissue, between FP and FS tissue of DL breed and between FP and FS Click here for additional data file	74	11	2.5755	0.00328185	0.0339797	8485c73d-2cf6-54c9-a2d6-7b87fd437d1d
PMC7755667	Transcriptional analysis of metastatic uveal melanoma survival nominates NRP1 as a therapeutic target	mr-31-27-s001.xlsx	Table_S2-HALLMARK_KRAS_SIGNALING_UP		200	26	2.22196	0.000107886	0.00200845	d026b43b-724d-5d8b-8cec-5914c9207998
PMC7755667	Transcriptional analysis of metastatic uveal melanoma survival nominates NRP1 as a therapeutic target	mr-31-27-s001.xlsx	Table_S2-HALLMARK_ESTROGEN_RESPONSE_EARLY		200	23	1.96558	0.00147383	0.017908	a66ee8d0-6d6f-575d-930b-53f3f3733ffe
PMC7760229	Magnetic Particles for CTC Enrichment	cancers-12-03525.nxml	CD_Abbr	In **Table 2** Overview of the antigens (used) for immunomagnetic tumor cell enrichmentEpithelial cells and no or few hematopoietic cellsCD44CD49fCD66eCD66fCD104CD118CD133CD164 (1)CD164 (2)CD164 (3)CD175CD175sCD176CD227CD283CDw293CD318CD325CD326CD331CD331-4CD332CD340CD344CD338CD350CKAREGFRERPSMATrop2Endothelial cells and no or few hematopoietic cellsCD62ECD144CD146CD201CD202bCD228CD248CD266CD299C…	38	12	5.39747	9.82878e-07	3.19226e-05	4a98748e-7b59-5cd2-afe7-6f1d5b4cdc93
PMC7781605	Defining human mesenchymal and epithelial heterogeneity in response to oral inflammatory disease	elife-62810-data1.xlsx	All_clusters-gene	Cluster markers (all, stromal, epithelial)	1768	200	1.93348	1.50428e-21	6.10845e-19	bf18f759-c421-5ae0-b990-ac2734379ec9
PMC7781605	Defining human mesenchymal and epithelial heterogeneity in response to oral inflammatory disease	elife-62810-data1.xlsx	Stromal_re-clustering-gene	Cluster markers (all, stromal, epithelial)	718	84	2.01364	4.30299e-10	2.90443e-08	506b108e-7231-5454-a051-4cb69fbd439a
PMC7781605	Defining human mesenchymal and epithelial heterogeneity in response to oral inflammatory disease	elife-62810-data1.xlsx	Epithelial_re-clustering-gene	Cluster markers (all, stromal, epithelial)	953	83	1.50919	8.57606e-05	0.0016467	8d516db7-9128-524f-b587-47871be14c70
PMC7782507	Thymidylate synthase drives the phenotypes of epithelial-to-mesenchymal transition in non-small cell lung cancer	41416_2020_1095_MOESM1_ESM.docx	6-SCD	dependency of NSCLC on TS, a dataset generated from a genome-wide CRISPR/Cas9 screen of **1** Supplementary Material	48	9	3.20475	0.00164077	0.0195673	ef6d5795-a5f7-559f-93b7-825655fbd9ab
PMC7782507	Thymidylate synthase drives the phenotypes of epithelial-to-mesenchymal transition in non-small cell lung cancer	41416_2020_1095_MOESM1_ESM.docx	3-SNORA73B	dependency of NSCLC on TS, a dataset generated from a genome-wide CRISPR/Cas9 screen of **1** Supplementary Material	79	12	2.59625	0.00203278	0.0231757	e3c1ed4f-aa5f-5c95-8c33-e84f8d3a143e
PMC7782507	Thymidylate synthase drives the phenotypes of epithelial-to-mesenchymal transition in non-small cell lung cancer	41416_2020_1095_MOESM1_ESM.docx	2-DERL1	dependency of NSCLC on TS, a dataset generated from a genome-wide CRISPR/Cas9 screen of **1** Supplementary Material	44	8	3.10763	0.00359316	0.0363432	88e1bb00-27ca-518d-8970-a8bbe70d3246
PMC7782839	EMTome: a resource for pan-cancer analysis of epithelial-mesenchymal transition genes and signatures	41416_2020_1178_MOESM2_ESM.xlsx	Table-2-Gene	with significant frequency in the literature as being correlated with EMT (see Methods; Fig. **2**) Dataset 2	934	97	1.77508	1.41932e-08	7.06393e-07	8108c05f-535d-598a-bdb6-c6d2cf07ef04
PMC7784864	Comparative analysis of cell lineage differentiation during hepatogenesis in humans and mice at the single-cell transcriptome level	41422_2020_378_MOESM17_ESM.xlsx	Mesenchymal_cell-Unnamed_1	differentially expressed during the human and mouse maturation processes (Fig. 8a–d; Supplementary information, Table **S8**) Supplementary information, Table S8	126	17	2.30606	0.00105828	0.0136782	cf486301-62b7-5c3e-85a8-20615fed0de1
PMC7787598	Two-step generation of mesenchymal stem/stromal cells from human pluripotent stem cells with reinforced efficacy upon osteoarthritis rabbits by HA hydrogel	13578_2020_516_MOESM7_ESM.xls	Sheet1-Additional_file_7_Additional_Table_S4_Gene_expression_profiling_DEGs	based on the raw data. The gene expression profiling was available in Additional file **7** Additional file 7: Table S4. The gene expression profiling of hESC-MSCs and hiPSC-MSCs	1023	102	1.70419	4.63822e-08	2.05567e-06	ff74ed70-9efb-5b51-a0a6-1b8fb41496dd
PMC7789679	Uncovering the secretome of mesenchymal stromal cells exposed to healthy, traumatic, and degenerative intervertebral discs: a proteomic analysis	13287_2020_2062_MOESM3_ESM.docx	1-Supplementary_Table_2_MSC_secretome_following_traumatic_CM_stimulation	Secretomes of MSCs treated with healthy, traumatic, degenerative IVD CM, or IL-**1** Additional file 3 : Supplementary Table 1. MSC secretome following healthy CM stimulation. Supplementary Table 2. MSC secretome following traumatic CM stimulation. Supplementary Table 3. MSC secretome following degenerative CM stimulation. Supplementary Table 4. MSC secretome following IL-1β stimulation	177	20	1.9313	0.00356964	0.0362009	8e8b8127-22b8-58a4-81be-69eae2cf0e0f
PMC7793715	Analysis of Hub Genes Involved in Distinction Between Aged and Fetal Bone Marrow Mesenchymal Stem Cells by Robust Rank Aggregation and Multiple Functional Annotation Methods	Table_2.XLSX	Sheet1-Name	in Figure 1C, and a complete list of the robust DEGs is provided in **Supplementary Table S2** The details of all the robust DEGs Click here for additional data file	662	70	1.82106	6.72457e-07	2.27372e-05	6a3e4eea-735d-59c1-8a2d-252aa1273239
PMC7796611	Deconstructing transcriptional variations and their effects on immunomodulatory function among human mesenchymal stromal cells	13287_2020_2121_MOESM2_ESM.xlsx	Table_S7-Unnamed_2	MSCs. A larger DM value indicated a greater variation (Fig. S3a and S3b; Table S**2**) Additional file 2: Table S1. Table S1 Information of MSCs RNA-seq samples downloaded from public GEO. Table S2. DM values for each gene expressed in MSC samples. Table S3. Information of samples clustered into different groups. Table S4 Results of different expression analysis among G0, G2, G3, and G4 groups. T…	222	24	1.84778	0.00270156	0.0290797	a6ab024d-e279-56c3-a3a7-4da9cc1439a5
PMC7831653	Neurological Manifestations of COVID-19 Feature T Cell Exhaustion and Dedifferentiated Monocytes in Cerebrospinal Fluid	mmc5.xlsx	Marker_genes_exhaustion_and_ISG-ISG	(proli_CD4: CCR7, ribosomal genes), and memory-like CD4+ T cells (memory_CD4: IL7R, CD69) (Figure 3B; **Table S4**) Table S4. Marker Genes of T Cell Subclusters, T Cell Exhaustion and ISG and Signatures, CSEA of CD4+ T Cell Clusters, DE Genes of Severe versus Mild Neuro-COVID, Related to Figures 3 and S2Sheet 1 named Marker genes T subclusters: Marker genes of the T cell subclusters. Average logF…	97	13	2.29068	0.00417852	0.0407537	a63e2858-8085-5347-940a-825fb4396fbd
PMC7835007	Systematic construction and validation of an epithelial–mesenchymal transition risk model to predict prognosis of lung adenocarcinoma	aging-13-202186-s002.docx	0-Supplementary_Table_2_Survival_related_ERGs_in_GSE31210	and corresponding survival time were subjected to univariate Cox regression analysis. Eventually, 139 and **2**	289	31	1.8334	0.000803869	0.0108878	ea88fe2d-8de9-556a-bad1-933ae20fea1a
PMC7843652	NUPR1 is a critical repressor of ferroptosis	41467_2021_20904_MOESM3_ESM.xlsx	Fig_1-Fig_1a		770	87	1.93117	1.64968e-09	9.96217e-08	127a715c-6fa2-52bf-a568-f09f220c95b5
PMC7843652	NUPR1 is a critical repressor of ferroptosis	41467_2021_20904_MOESM3_ESM.xlsx	Fig_1-Unnamed_3		770	87	1.93117	1.64968e-09	9.96217e-08	127a715c-6fa2-52bf-a568-f09f220c95b5
PMC7844258	Notch signaling-modified mesenchymal stem cells improve tissue perfusion by induction of arteriogenesis in a rat hindlimb ischemia model	41598_2021_82284_MOESM4_ESM.xlsx	Annotation-Input_ID	analysis revealed upregulation of “fluid shear stress and atherosclerosis” (hsa:05418) (Fig. 4C, Supplementary Table **S3**) Supplementary Table S3	531	69	2.22099	2.78995e-10	1.95555e-08	4cfb2be4-04f3-5d43-8cf7-5edf7e5e0b4b
PMC7844258	Notch signaling-modified mesenchymal stem cells improve tissue perfusion by induction of arteriogenesis in a rat hindlimb ischemia model	41598_2021_82284_MOESM3_ESM.xlsx	Annotation-Input_ID	(GO:0036293), “blood vessel development” (GO:0001568), and “response to wounding” (GO:0009611) (Fig. 4B, Supplementary Table **S2**) Supplementary Table S2	531	69	2.22099	2.78995e-10	1.95555e-08	4cfb2be4-04f3-5d43-8cf7-5edf7e5e0b4b
PMC7844258	Notch signaling-modified mesenchymal stem cells improve tissue perfusion by induction of arteriogenesis in a rat hindlimb ischemia model	41598_2021_82284_MOESM4_ESM.xlsx	Annotation-Gene_Symbol	analysis revealed upregulation of “fluid shear stress and atherosclerosis” (hsa:05418) (Fig. 4C, Supplementary Table **S3**) Supplementary Table S3	533	69	2.21266	3.28937e-10	2.27221e-08	1b003608-6b3f-52dd-bff2-b113c5337f79
PMC7844258	Notch signaling-modified mesenchymal stem cells improve tissue perfusion by induction of arteriogenesis in a rat hindlimb ischemia model	41598_2021_82284_MOESM3_ESM.xlsx	Annotation-Gene_Symbol	(GO:0036293), “blood vessel development” (GO:0001568), and “response to wounding” (GO:0009611) (Fig. 4B, Supplementary Table **S2**) Supplementary Table S2	533	69	2.21266	3.28937e-10	2.27221e-08	1b003608-6b3f-52dd-bff2-b113c5337f79
PMC7851345	Gene expression profiles of inflammatory breast cancer reveal high heterogeneity across the epithelial-hybrid-mesenchymal spectrum	mmc2.xlsx	GSE45581-Gene		1191	117	1.68047	9.03209e-09	4.71035e-07	ecf509bd-00cf-517c-8288-9fd71c1d3971
PMC7851345	Gene expression profiles of inflammatory breast cancer reveal high heterogeneity across the epithelial-hybrid-mesenchymal spectrum	mmc2.xlsx	Sheet4-Unnamed_1		1191	117	1.68047	9.03209e-09	4.71035e-07	ecf509bd-00cf-517c-8288-9fd71c1d3971
PMC7851345	Gene expression profiles of inflammatory breast cancer reveal high heterogeneity across the epithelial-hybrid-mesenchymal spectrum	mmc2.xlsx	GSE22597-Gene		1593	135	1.45212	2.91744e-06	8.46078e-05	24b4717f-0285-583f-89b5-dc38d32e955c
PMC7851345	Gene expression profiles of inflammatory breast cancer reveal high heterogeneity across the epithelial-hybrid-mesenchymal spectrum	mmc2.xlsx	Sheet4-Unnamed_2		1593	135	1.45212	2.91744e-06	8.46078e-05	24b4717f-0285-583f-89b5-dc38d32e955c
PMC7862469	FOXO3-engineered human mesenchymal progenitor cells efficiently promote cardiac repair after myocardial infarction	13238_2020_779_MOESM4_ESM.xlsx	FOXO3-GE_VS_WT-GeneID	Supplementary material 4 (XLSX 120 kb)	543	57	1.79419	1.17823e-05	0.000292119	0665c1cc-1c3d-5f49-bebb-59dec6f82944
PMC7862469	FOXO3-engineered human mesenchymal progenitor cells efficiently promote cardiac repair after myocardial infarction	13238_2020_779_MOESM4_ESM.xlsx	FOXO3-GE_VS_WT-Symbol	Supplementary material 4 (XLSX 120 kb)	549	56	1.74663	3.02341e-05	0.000666875	bc29dfc6-46ce-5712-8cd1-49d02463250e
PMC7875972	Pluripotency and immunomodulatory signatures of canine induced pluripotent stem cell-derived mesenchymal stromal cells are similar to harvested mesenchymal stromal cells	41598_2021_82856_MOESM1_ESM.xlsx	Supp_1A_Venny_Exp_Genes-Unnamed_13	CD90 (THY-1) and CD105 (ENDOG), confirming our original data42, in addition to CD-44 (Fig. **1a**) Supplementary Data	555	54	1.663	0.000151747	0.0026842	4a3d5114-3a13-5417-81a2-bc5e121d599d
PMC7876250	Development of a Metastasis-Related Immune Prognostic Model of Metastatic Colorectal Cancer and Its Usefulness to Immunotherapy	Table_4.xlsx	Sheet1-TF	attached in Supplementary Tables 1–3. The upstream transcript factor prediction results were attached in **Supplementary Table 4** Click here for additional data file	1609	136	1.44469	3.47613e-06	9.8871e-05	b94103e7-6fb5-5429-8416-113e251632f8
PMC7877842	Expression of Paracrine Effectors in Human Adipose‐Derived Mesenchymal Stem Cells Treated With Plasma From Brown Bears (Ursus arctos)	CTS-14-317-s001.docx	0-Unnamed_0	all of the differentially expressed genes within each category are stated in Supplementary Table **S1** Table S1 Click here for additional data file	208	22	1.81654	0.00487183	0.0463261	9bf92d12-41a6-5010-ae1e-2caeaa706b79
PMC7880683	SATB2 induction of a neural crest mesenchyme-like program drives melanoma invasion and drug resistance	elife-64370-supp2.xlsx	IPA_INPUT-HUMAN_GENE	al., 2016, including sox10, snai2, pax7, chd7, and semaforin (sema3fa) are bound by SATB2 (**Supplementary file 2**) Differential gene expression list of primary MCR:SATB2 vs MCR:EGFP tumors by RNA-seq (Sheet 1).Genes confirmed by qPCR on a large panel of primary MCR:SATB2 tumors versus MCR:EGFP tumors. Red is upregulated, green is downregulated. (Sheet 2). Best human ortholog prediction with DIO…	805	86	1.82598	2.86872e-08	1.33398e-06	b1db196a-e028-56ea-9e2c-46ed7b129c59
PMC7880683	SATB2 induction of a neural crest mesenchyme-like program drives melanoma invasion and drug resistance	elife-64370-supp4.xlsx	FC_1_p_0_05-test_id	RNA-seq of SKMEL2 TetOn SATB2 48 hr +/- doxycycline.(Sheet 1) Genes with a log(2) fold change >1.0 and a p-value<0.05. (Sheet 2) Unfiltered RNA-seq expression data	1933	166	1.46781	7.26141e-08	3.07748e-06	e538ccfe-4898-5aea-ad28-9a7885844494
PMC7880683	SATB2 induction of a neural crest mesenchyme-like program drives melanoma invasion and drug resistance	elife-64370-supp4.xlsx	FC_1_p_0_05-gene_id	RNA-seq of SKMEL2 TetOn SATB2 48 hr +/- doxycycline.(Sheet 1) Genes with a log(2) fold change >1.0 and a p-value<0.05. (Sheet 2) Unfiltered RNA-seq expression data	1932	165	1.45972	1.15964e-07	4.69137e-06	b934ef3b-8723-5112-9715-950035bfe933
PMC7880683	SATB2 induction of a neural crest mesenchyme-like program drives melanoma invasion and drug resistance	elife-64370-supp4.xlsx	FC_1_p_0_05-gene	RNA-seq of SKMEL2 TetOn SATB2 48 hr +/- doxycycline.(Sheet 1) Genes with a log(2) fold change >1.0 and a p-value<0.05. (Sheet 2) Unfiltered RNA-seq expression data	1932	165	1.45972	1.15964e-07	4.69137e-06	b934ef3b-8723-5112-9715-950035bfe933
PMC7880683	SATB2 induction of a neural crest mesenchyme-like program drives melanoma invasion and drug resistance	elife-64370-supp2.xlsx	Confirmed_by_qPCR-Human_ortholog	al., 2016, including sox10, snai2, pax7, chd7, and semaforin (sema3fa) are bound by SATB2 (**Supplementary file 2**) Differential gene expression list of primary MCR:SATB2 vs MCR:EGFP tumors by RNA-seq (Sheet 1).Genes confirmed by qPCR on a large panel of primary MCR:SATB2 tumors versus MCR:EGFP tumors. Red is upregulated, green is downregulated. (Sheet 2). Best human ortholog prediction with DIO…	33	7	3.62557	0.0025631	0.0279342	ca135e1d-44c3-5b4a-a3b8-8995640a1c0a
PMC7907195	Adipose-derived mesenchymal stem cells differentiate into heterogeneous cancer-associated fibroblasts in a stroma-rich xenograft model	41598_2021_84058_MOESM7_ESM.xlsx	Kmeans-Unnamed_1	Supplementary Information 7	2307	245	1.81672	4.69269e-23	2.22475e-20	c55fe189-a91c-5e10-8489-7eb8c73e486d
PMC7907195	Adipose-derived mesenchymal stem cells differentiate into heterogeneous cancer-associated fibroblasts in a stroma-rich xenograft model	41598_2021_84058_MOESM7_ESM.xlsx	Kmeans-Unnamed_0	Supplementary Information 7	2317	245	1.80731	9.65684e-23	4.46653e-20	9729c7c4-9d44-558c-80fd-62f57785fa20
PMC7907195	Adipose-derived mesenchymal stem cells differentiate into heterogeneous cancer-associated fibroblasts in a stroma-rich xenograft model	41598_2021_84058_MOESM6_ESM.xlsx	Diff_genes_heatmap_Sr_CDX-AD_MS-Symbol	Supplementary Information 6	2187	227	1.77488	6.83181e-20	2.23179e-17	938520bb-0859-5d2f-a67a-df9b6957a00c
PMC7907195	Adipose-derived mesenchymal stem cells differentiate into heterogeneous cancer-associated fibroblasts in a stroma-rich xenograft model	41598_2021_84058_MOESM6_ESM.xlsx	Diff_genes_heatmap_Sr_CDX-AD_MS-Ensembl_ID	Supplementary Information 6	2198	227	1.76519	1.34849e-19	4.2146e-17	17f72308-2a90-5ebc-9a77-f54a91885ed8
PMC7933252	Epithelial to mesenchymal transition and microRNA expression are associated with spindle and apocrine cell morphology in triple-negative breast cancer	41598_2021_84350_MOESM7_ESM.xlsx	182-Unnamed_4	miRNAs from Table 3. Target genes of these miRNAs are provided as Supplementary Tables **2a** Supplementary Table 2a	1263	128	1.7322	2.29978e-10	1.63816e-08	65cdbbfe-d31d-5e31-b5be-62c6d919dc84
PMC7933252	Epithelial to mesenchymal transition and microRNA expression are associated with spindle and apocrine cell morphology in triple-negative breast cancer	41598_2021_84350_MOESM7_ESM.xlsx	185-Unnamed_4	miRNAs from Table 3. Target genes of these miRNAs are provided as Supplementary Tables **2a** Supplementary Table 2a	1127	110	1.66825	3.96708e-08	1.78598e-06	3b575e6d-617d-53af-b644-7ca22d6158bf
PMC7933252	Epithelial to mesenchymal transition and microRNA expression are associated with spindle and apocrine cell morphology in triple-negative breast cancer	41598_2021_84350_MOESM9_ESM.xlsx	205-Unnamed_4	Regarding **c** Supplementary Table 2c	730	79	1.84968	6.39487e-08	2.7466e-06	df4afa0f-ca69-5bcf-9cd9-d84f9323bb6f
PMC7933252	Epithelial to mesenchymal transition and microRNA expression are associated with spindle and apocrine cell morphology in triple-negative breast cancer	41598_2021_84350_MOESM9_ESM.xlsx	145-Unnamed_4	Regarding **c** Supplementary Table 2c	905	92	1.73753	9.46176e-08	3.90763e-06	8dc80225-369f-5ea8-a672-6ac071c85e7f
PMC7933252	Epithelial to mesenchymal transition and microRNA expression are associated with spindle and apocrine cell morphology in triple-negative breast cancer	41598_2021_84350_MOESM8_ESM.xlsx	3135-Unnamed_4	Supplementary Table 2b	679	73	1.84029	2.54978e-07	9.54174e-06	7bf6b4e3-4536-57b9-9627-9268a143b77b
PMC7933252	Epithelial to mesenchymal transition and microRNA expression are associated with spindle and apocrine cell morphology in triple-negative breast cancer	41598_2021_84350_MOESM9_ESM.xlsx	143-Unnamed_4	Regarding **c** Supplementary Table 2c	731	76	1.77701	5.71249e-07	1.96426e-05	416e3bf2-2c83-5636-a484-d363e2029622
PMC7933252	Epithelial to mesenchymal transition and microRNA expression are associated with spindle and apocrine cell morphology in triple-negative breast cancer	41598_2021_84350_MOESM7_ESM.xlsx	4443-Unnamed_4	miRNAs from Table 3. Target genes of these miRNAs are provided as Supplementary Tables **2a** Supplementary Table 2a	933	82	1.50219	0.000110682	0.00205232	093e8cbd-697e-509d-8dfd-6f935e3fddfa
PMC7933252	Epithelial to mesenchymal transition and microRNA expression are associated with spindle and apocrine cell morphology in triple-negative breast cancer	41598_2021_84350_MOESM7_ESM.xlsx	22-Unnamed_4	miRNAs from Table 3. Target genes of these miRNAs are provided as Supplementary Tables **2a** Supplementary Table 2a	503	48	1.63104	0.000540075	0.00787024	dcd7065d-44a2-5788-a348-282e4de806a0
PMC7933252	Epithelial to mesenchymal transition and microRNA expression are associated with spindle and apocrine cell morphology in triple-negative breast cancer	41598_2021_84350_MOESM7_ESM.xlsx	1225-Unnamed_4	miRNAs from Table 3. Target genes of these miRNAs are provided as Supplementary Tables **2a** Supplementary Table 2a	210	25	2.03476	0.000565113	0.00813801	4cb228d4-7d7b-532a-8915-2da135bed430
PMC7933252	Epithelial to mesenchymal transition and microRNA expression are associated with spindle and apocrine cell morphology in triple-negative breast cancer	41598_2021_84350_MOESM8_ESM.xlsx	4632-Unnamed_4	Supplementary Table 2b	672	60	1.52607	0.000641231	0.00903938	b71d793f-9526-5d37-8129-1de45d380d1d
PMC7947881	Extracellular Vesicles Derived From Adult and Fetal Bone Marrow Mesenchymal Stromal Cells Differentially Promote ex vivo Expansion of Hematopoietic Stem and Progenitor Cells	Table_1.XLSX	5_fEV_differential_expressed-Gene_names	frequently identified exosomal proteins, as defined by the ExoCarta database (Keerthikumar et al., 2016; **Supplementary Table 1**) Proteomics data. Proteomics identification of all proteins present in aEVs and fEVs (n = 3 each). Proteins identified in both (1) aEVs and fEVS (2283 proteins), proteins that were identified only in aEVs (2) or fEVs (3), proteins that were overrepresented in aEVs (4)…	245	25	1.74408	0.00477184	0.0454549	aed9f219-103d-5c31-9d32-f56295a78ddb
PMC7988085	In Vitro Culture Expansion Shifts the Immune Phenotype of Human Adipose-Derived Mesenchymal Stem Cells	Table_1.xlsx	Immuno-Matrix-pathway-Metablism_genes	younger than 45 years old with a body mass index lower than 25 ( **Supplementary Table S1**) Click here for additional data file	244	30	2.10147	9.30249e-05	0.00176748	a248dfc0-a3b5-5880-88ed-ea25d81ff2c6
PMC7988085	In Vitro Culture Expansion Shifts the Immune Phenotype of Human Adipose-Derived Mesenchymal Stem Cells	Table_2.xlsx	Immuno-Matrix-Pathway-Chemokines	for specific target genes were designed using the software Oligo Explorer 1.2 (Genelink) ( **Supplementary Table S2**) Click here for additional data file	200	25	2.1365	0.000269414	0.00437305	d80ac872-b049-50c5-943c-e75ce2c051d2
PMC8024246	Eradication of specific donor-dependent variations of mesenchymal stem cells in immunomodulation to enhance therapeutic values	41419_2021_3644_MOESM9_ESM.xlsx	bv2cor_sig-Column1	“response to topologically incorrect protein” and “intermediate filament organization” (Fig. 3C and Supplementary Table **S3**) Table S3	968	78	1.37725	0.0020483	0.0233325	a1647f8f-8746-5f5f-80e1-e73aba1a3dae
PMC8024778	Transcriptome Landscape of Epithelial to Mesenchymal Transition of Human Stem Cell–Derived RPE	iovs-62-4-1_s006.xlsx	Overlap_DEG-Gene_ID	ontology–based enrichment analyis of the differentially expressed RPE-EMT associated genes (Datasets S04, S05, and **S06**) Supplement 6	739	92	2.13071	2.54432e-12	2.60842e-10	edd17916-8bea-59eb-a5cf-f9b9c8f5e10d
PMC8024778	Transcriptome Landscape of Epithelial to Mesenchymal Transition of Human Stem Cell–Derived RPE	iovs-62-4-1_s012.xlsx	TGFB_TNFA_overlap_5_ng-2000-2017_QIAGEN_All_rights_reserved	Details about the primary antibodies and the dilutions that were used are given in **Supplementary Table S2** Supplement 12	1302	136	1.79084	5.33601e-12	5.14763e-10	8def83c2-f908-56d7-b7c4-b79fea1df8aa
PMC8024778	Transcriptome Landscape of Epithelial to Mesenchymal Transition of Human Stem Cell–Derived RPE	iovs-62-4-1_s012.xlsx	TGFB_TNFA_overlap_1ng-2000-2017_QIAGEN_All_rights_reserved	Details about the primary antibodies and the dilutions that were used are given in **Supplementary Table S2** Supplement 12	1124	119	1.81602	6.00054e-11	4.78517e-09	ad7be56c-2542-54b0-9434-6e814640523d
[truncated: 423 more rows]
