# Supplementary material for: The impact of heterozygous BRCA1 mutations on ovarian angiogenesis
Source: Research Square preprint supplement (doi:10.21203/rs.3.rs-7980820/v1), 2025-12-04
Supplement: Supplementary file 2 [file 0bf9e5ccfb6fdd08c8f83347.docx]

**Supplemental Material**

**The impact of heterozygous BRCA1 mutations on ovarian angiogenesis**

Silvia Pegoraro1#, Barbara Fogar2#, Mariagiulia Spazzapan3#, Giulia Canarutto3,4, Andrea Balduit1, Miriam Toffoli2, Alessandro Mangogna3,5, Gabriella Zito1, Federico Romano1, Giovanni Papa2, Luca Spazzapan2, Francesca Rossi1, Eva Andreuzzi1, Silvano Piazza3,4, Giuseppe Ricci1,2, Chiara Agostinis1$* and Roberta Bulla3$*

1. Institute for Maternal and Child Health, IRCCS Burlo Garofolo, Trieste, Italy
2. Department of Medical, Surgical and Health Science, University of Trieste, Trieste, Italy
3. Department of Life Sciences, University of Trieste, Trieste, Italy
4. International Centre for Genetic Engineering and Biotechnology (ICGEB), Trieste, Italy
5. Institute of Pathological Anatomy, Department of Medicine, University of Udine, Italy
6. Department of Chemical and Pharmaceutical Sciences, University of Trieste, Trieste, Italy

* **Correspondence:** Chiara Agostinis (cagostinis@units.it). Institute for Maternal and Child Health - IRCCS “Burlo Garofolo”, Trieste, Italy. Phone: +39 040 5588652.

Roberta Bulla ([rbulla@units.it](mailto:rbulla@units.it)). Department of Life Sciences, University of Trieste, Trieste, Italy. Phone: +39 040 5588646.

# Equally contributed to the manuscript

$ Shared the senior authorship

**Running Title:** BRCA1 mutations on ovarian angiogenesis

**Keywords:** Angiogenesis, endothelial cells, BRCA1 mutations, EndMT.

# Supplemental Materials and Methods

**2.1. Patient enrollment**

Patients were enrolled from the Department of Obstetrics and Gynecology of the Institute for Maternal and Child Health IRCCS Burlo Garofolo (Trieste, Italy). The inclusion criteria for the study were as follows: patients scheduled for ovariectomy/annessiectomy (oophorectomy by laparoscopy) for Gender Dysphoria (GD), BRCA mutations, and women affected by other gynecological abnormalities (*e.g.*, paraovarian fibroma, endometrial hyperplasia). The exclusion criteria were the following: patients under 18 years of age, patients suspected of having peritoneal neoplasia, patients who did not provide voluntary informed consent, patients infected by SARS-CoV-2, HIV, HCV, HBV, or other sexually transmitted diseases.

After surgery, the samples were examined at the Pathological Anatomy Department of the Cattinara Hospital (Trieste, Italy) to exclude any malignancy. Here, a piece (2 cm x 1 cm) of ovarian cortex was cut by the pathologist, put into a sterile tube containing culture medium, and processed rapidly. All identifying information, except for age and reason for oophorectomy, was removed from the samples before starting the cell isolation protocol. All patients signed an informed consent form, following the ethical considerations by CEUR (prot. 0010144/P/GEN/ARCS 2019), the regional ethical committee for Friuli Venezia-Giulia (Italy).

**2.3. Antibodies**

Antibodies used in immunohistochemistry (IHC), immunofluorescence (IF), and flow cytometry analyses, are listed in **Supplementary Table S1**.

**Supplementary Table S1. List of antibodies used in immunohistochemistry, immunofluorescence, and flow cytometry.**

| **Name** | **Reference Number** | **Brand** | **Host** | **Clonality** | **Diluition** | **Application** |
| --- | --- | --- | --- | --- | --- | --- |
| **Von Willebrand Factor** | M0616 | Dako | Mouse | Monoclonal | 1:50 | IF |
| **Vimentin** | V6-630 | Sigma | Mouse | Monoclonal | 1:100 | IF |
| **VE-Cadherin** | Sc-52751 | Santa Cruz | Mouse | Monoclonal | 1:50 | IF |
| **CD34** | MA5-15331 | Invitrogen | Mouse | Monoclonal | 1:300 | IHC |
| **BRCA1** | G3024 | Santa Cruz | Mouse | Monoclonal | 1:25 | IF |
| **CD31** | ZRB1216 | Sigma | Rabbit | Monoclonal | 1:50 | IF, IHC |
| **TJP1** | PA001636 | Sigma | Rabbit | Polyclonal | 1:200 | IF |
| **LYVE1 DyLightTM 488-conjugated** | PA5-22783 | Invitrogen |  | Polyclonal | 1:20 | FCM |
| **Phalloidin FITC-conjugated** | F432 | Invitrogen |  |  | 1:30 | IF |
| **CD31 PE-Cy7-conjugated** | 25-0319-41 | Invitrogen |  |  | 1:20 | FCM |
| **CD90 PE-conjugated** | 12-0909-41 | Invitrogen |  |  | 1:20 | FCM |
| **Anti-mouse Cy3-conjugated** | AB_2338680 | Jackson ImmunoResearch |  |  | 1:300 | IF |
| **Anti-Rabbit Cy3-conjugated** | AB_2338000 | Jackson ImmunoResearch |  |  | 1:300 | IF |
| **Anti-Rabbit HRP** | AP182P | Millipore | Donkey | Polyclonal | 1:300 | IHC |
| **Anti-Mouse HRP** | K4001 | Dako |  |  |  | IHC |

Abbreviations: FCM, flow cytometry; FITC, fluorescein isothiocyanate; HRP, horseradish peroxidase; IF, immunofluorescence; IHC, immunohistochemistry; LYVE1, Lymphatic Vessel Endothelial Receptor 1; PE, phycoerythrin; TJP1, Tight Junction Protein1; VE, vascular endothelial.

**2.5 QuPath Vessel quantification**

Immunohistochemically stained tissue sections for CD34 and CD31 were analyzed using QuPath (version 0.5.1). Whole-slide images of the ovarian sections were acquired using a SLIDEVIEW VS200 scanner (Olympus). For each sample, between 5 and 7 cropped regions (1mm x 1mm) were extracted from the whole-slide images from both WT and BRCA1-mut patients. To detect CD34/CD31-positive vessels, a pixel classifier was created via Classify > Pixel classify > Create threshold with the following settings: color deconvolution set to Full DAB, Gaussian pre-processing enabled, smoothing sigma = 4, threshold level = 0.5, and detection class set to Positive. The classifier was saved as Vessel detection. This classifier was then loaded (Classify > Pixel classify > Load Pixel Classifier) and applied to the images to generate vessel detections. Detected positive pixels were converted into objects (Create objects) and refined using Detection parameters: minimum size = 20 µm² and maximum size = 2000 µm², with object splitting enabled. Shape features were extracted using Analyze > Calculate features > Add shape features, and detection-level measurements were visualized using Measure > Show detection measurements. To ensure analysis across the entire image area, full image annotations were created via Objects > Annotations > Create full image annotation. Quantification was performed by calculating the number of CD34 or CD31-positive vessels per cropped image. This metric was used to compare vascular density between WT and mut samples.

**2.11. Evaluation of real-time cell growth using a microfluidic device**

An innovative microfluidic device was used to conduct real-time evaluations of cell growth. The prototype, referred to as the “TICheP system”, was developed by I.R.S. s.r.l. (Pordenone, Italy) as part of the TICheP project (https://www.tichep.com). The TICheP project aimed at developing a fully automated perfusion flow microfluidic system for performing drug sensitivity tests on ovarian cancer cells within the framework of personalized therapies. The prototype integrates a multi-well chip, a multichannel peristaltic pump, a temperature-controlled heating system, an integrated EclipseTi2-E microscopy (Nikon) for real-time imaging, and LabVIEWsoftware (National Instruments, USA) (17).

For the real-time evaluation of cell growth, the cells (350 cells/μL) were seeded into the 20 μL-wells of an 8-well Zeonor microchip (Microfluidic ChipShop, Jena, Germany) and left to adhere at 37°C ON. The following day, the cells were subjected to serum starvation by delivering SFM at a constant flow rate of 4.09 μL/min for 30 min. Images of cell confluence in each well were captured every 15 min. After 24h and 48h of starvation, the changes in cell confluence (Δ confluence) were evaluated.

**Supplementary Figures**


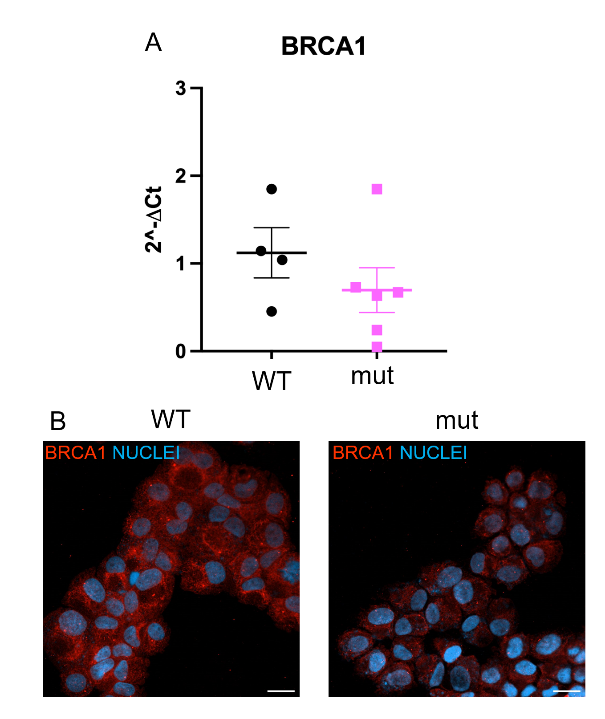


**Supplementary Fig. S1. (A)** Evaluation of BRCA1 gene expression by RT-qPCR comparing WT and mut OVECs. The gene expression levels were calculated using the ΔCt method, normalizing to the TBP housekeeping gene. Data are expressed as individual values along with the mean ± SEM from 4 WT and 6 mut cell populations. (**B**) Immunofluorescence analysis of BRCA1 expression (shown in red) was conducted using monoclonal anti-human BRCA1 and anti-mouse Cy3-Conjugated secondary antibodies on WT or mut OVECs. Nuclei were stained in blue with DAPI. Scale bar, 20 µm.


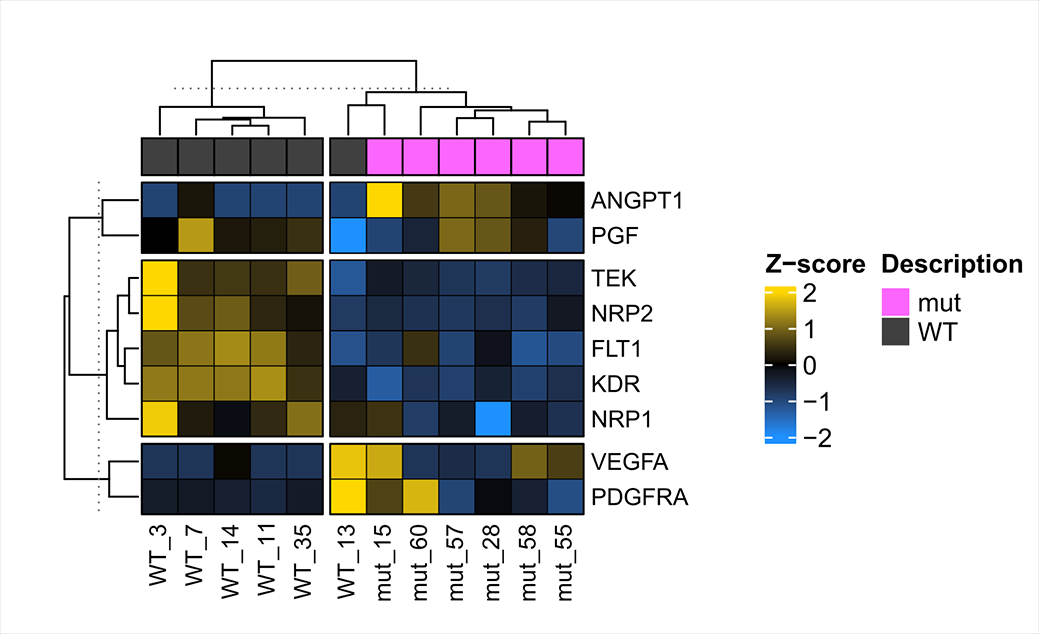


**Supplementary Fig. S2**. Heatmap from RNA-seq data of selected angiogenic receptors and growth factors. In blue is represented downregulation and in yellow upregulation.


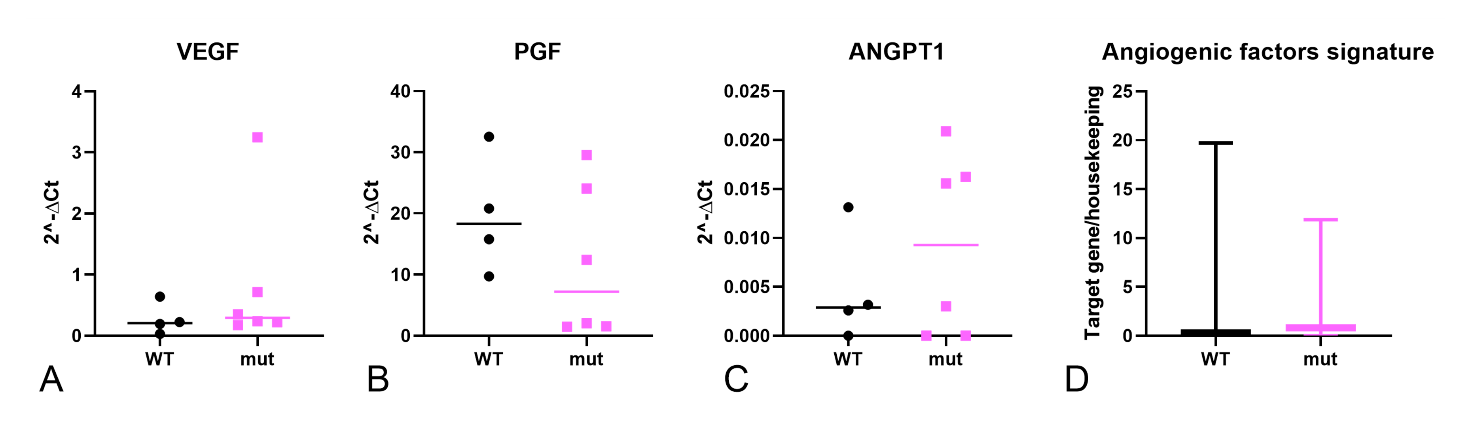


**Supplementary Fig. S3**. RT-qPCR of angiogenic growth factor genes *VEGF* (**A**), *PGF* (**B**), and *AGPT1* (**C**) expressed by WT vs mut OVECs. The gene expression levels were calculated using the ΔCt method, normalizing to the TBP housekeeping gene. Data are expressed as individual values along with mean ± SEM of 4 WT and 6 mut OVEC populations. (**D**) Analysis of the angiogenic factor signature, combining the results of the 2^-ΔCt average of each growth factor investigated by RT-qPCR in WT *vs* mut OVECs.


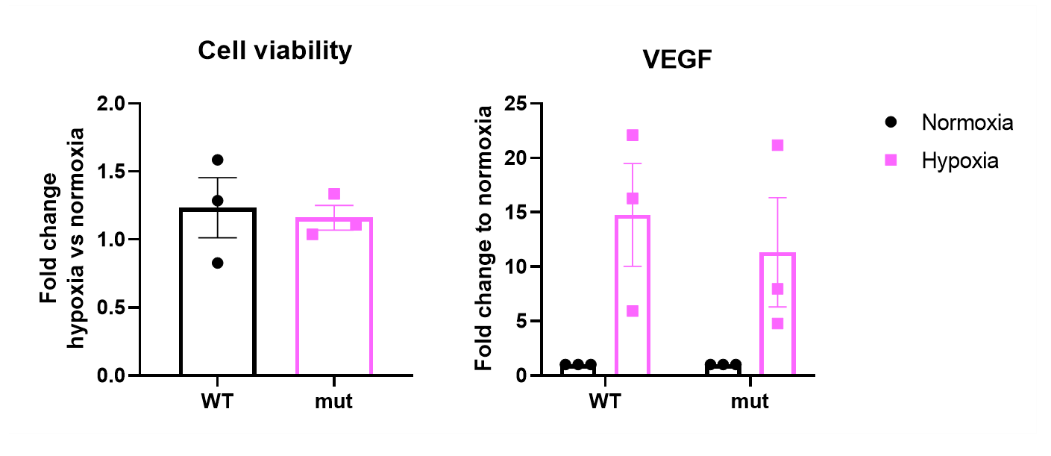


B

A

**Supplementary Fig. S4** (**A**)Viability assays were performed using the MTS assay on WT and mut OVECs, growth in normoxic (black dots) or in hypoxic (pink squares) conditions of pO2 for 24h. Three different populations of WT and mut OVECs were analyzed. The data are presented as mean ± SEM and normalized to normoxic growth OVECs. (**B**) RT-qPCR of angiogenic growth factor genes *VEGF*expressed by WT vs mut OVECs growth in normoxic (black dots) or in hypoxic (pink squares) conditions of pO2 for 24h. The gene expression levels were calculated using the ΔΔCt method, normalizing to the TBP housekeeping gene. Data are expressed as individual values along with mean ± SEM of 3 WT and 3 mut OVEC populations.


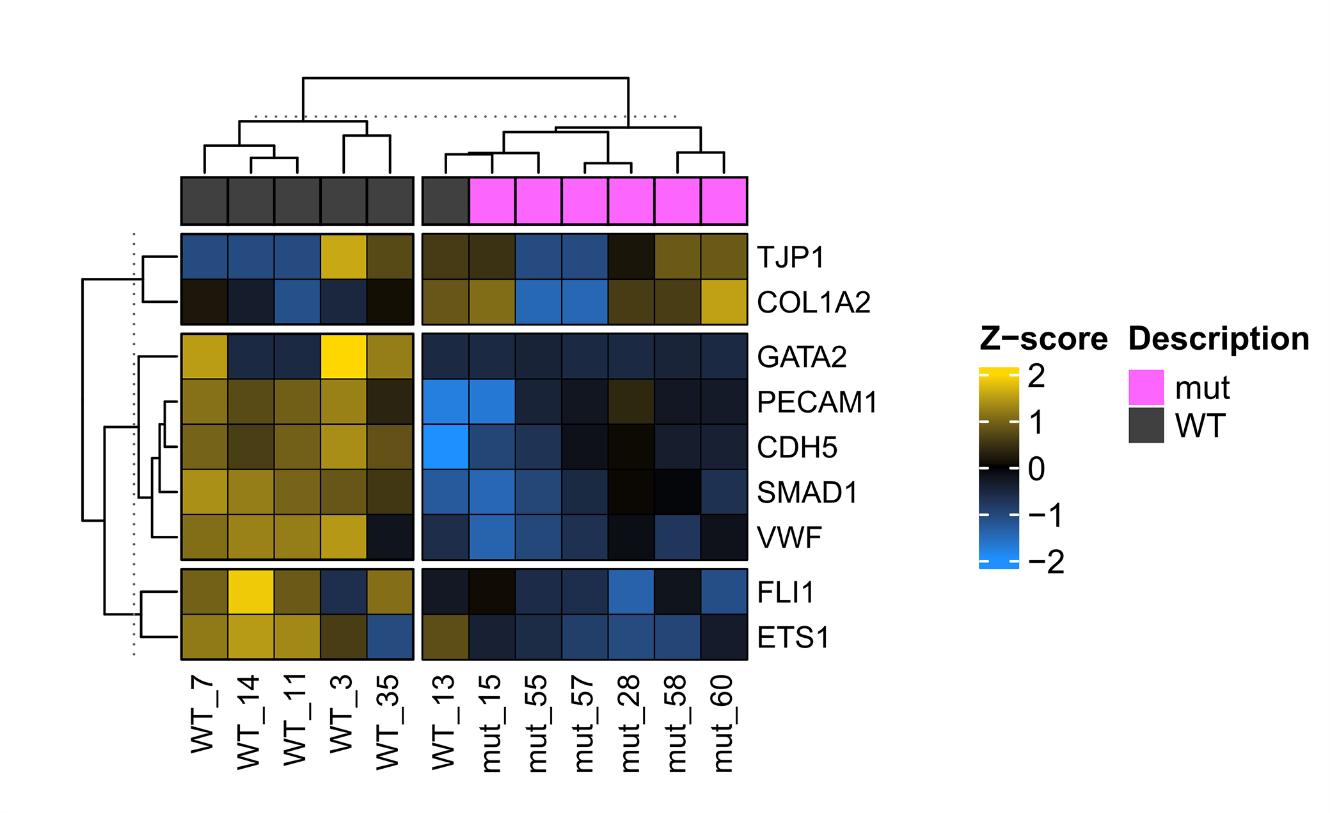


**Supplementary Fig. S5**. Heatmap from RNA-seq data of selected EndMT gene markers. In blue is represented downregulation and in yellow upregulation.


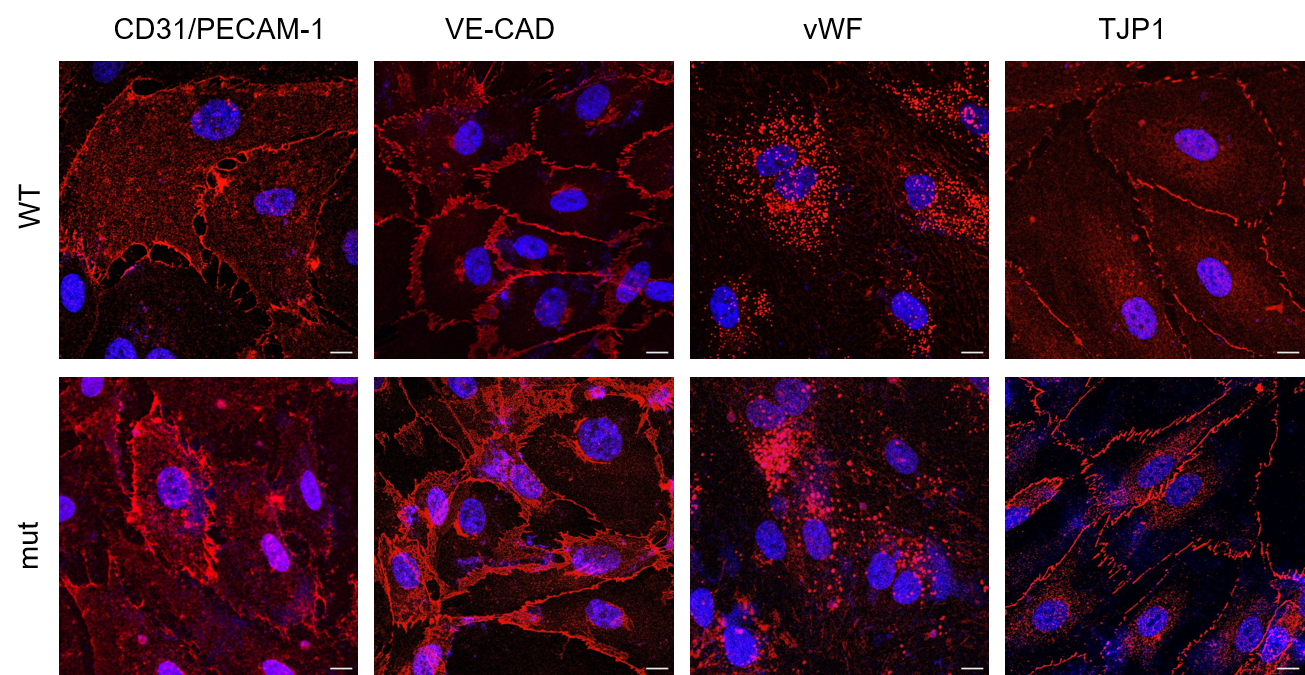


**Supplementary Fig. S6.** Zoom of pictures presented in Fig. 5B used to characterize and compare the expression of endothelial markers in mut *vs* WT OVECs. ECs were stained in red for CD31/PECAM-1, VE-cadherin, vWF, or TJP1, whereas the nuclei were stained in blue with DAPI. Images were acquired using a Zeiss Lsm 900 confocal microscope and processed with ImageJ software. Scale bar, 10 µm.


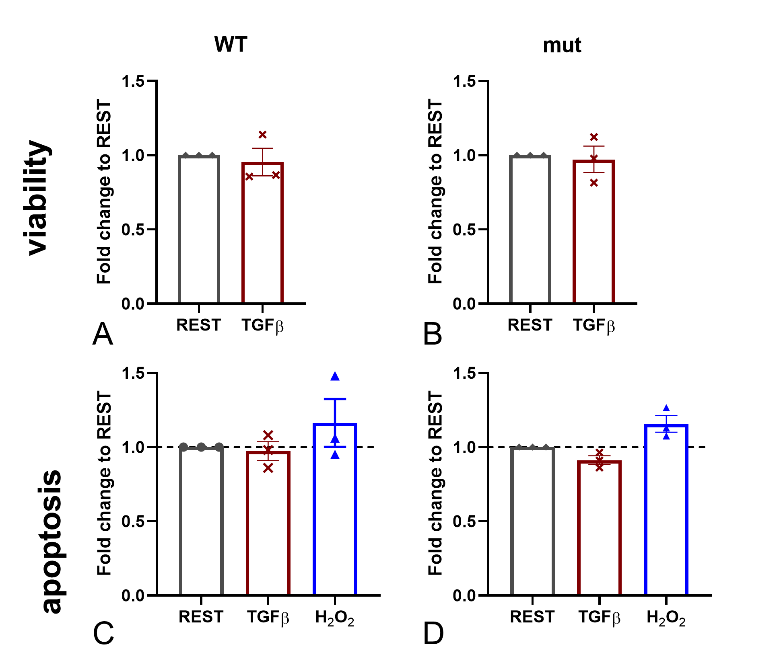


**Supplementary Fig. S7**. (**A,B**) Viability assays were performed using the MTS assay on WT and mut OVECs, stimulated or not (SFM) with TGFβ 10 ng/mL for 24h. Three different populations of WT and mut OVECs were analyzed. The data are presented as mean ± SEM and normalized to untreated (REST) OVECs. (**C,D**) Evaluation of the proapoptotic effect of TGFβ on OVECs. WT and mut cells were grown to 80% of confluence in 96-well plates and incubated with TGFβ 10 ng/mL or 500 μM H2O2 as positive control of apoptosis for 24 h 37°C. The cells were then incubated with 5 μM of CellEvent Caspase-3/7 Green Detection Reagent (Life Technologies), a fluorogenic substrate for activated caspases 3 and 7. The fluorescence data were normalized for the total protein present in each well. Data are expressed as mean ± SE of results from three experiments each performed in triplicate.


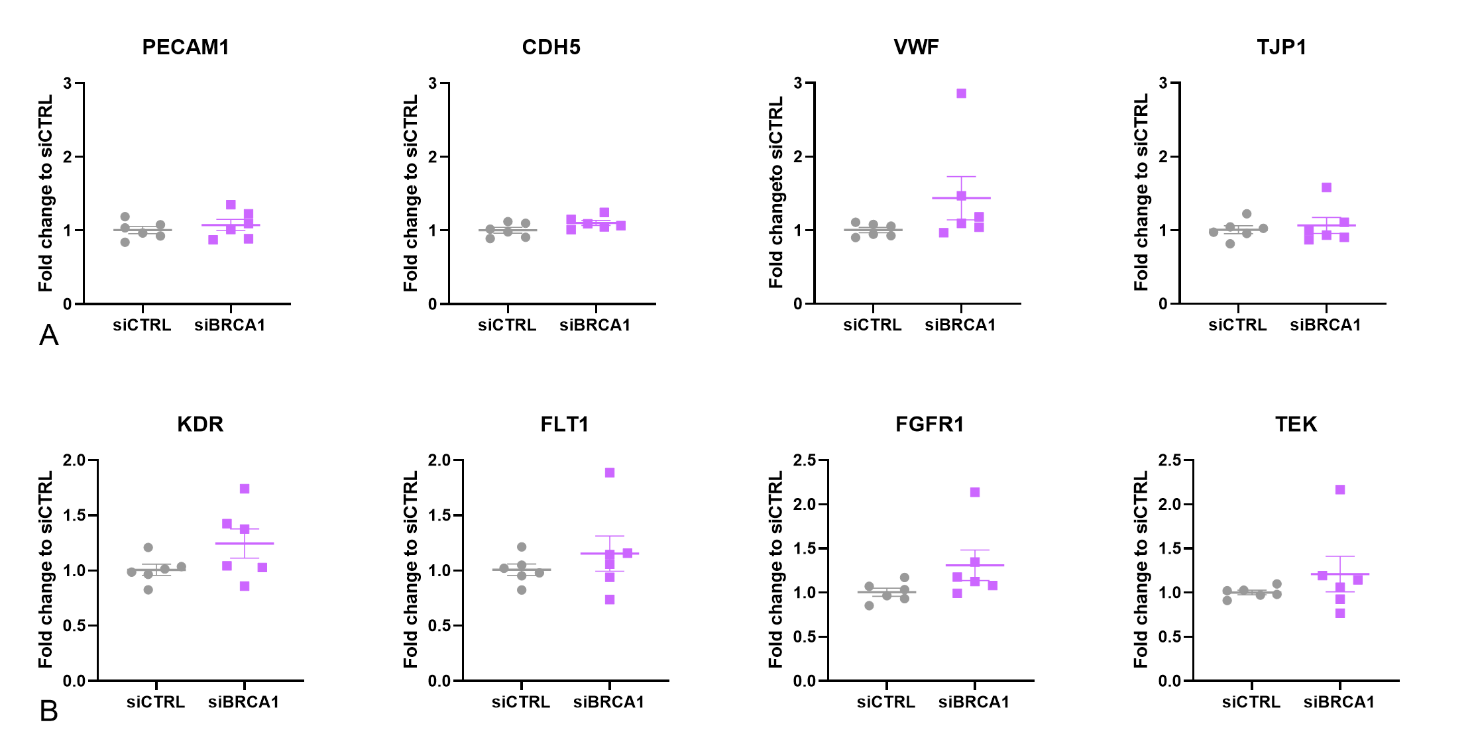


**Supplementary Fig. S8.** RT-qPCR analysis of endothelial markers and angiogenesis receptors expressed by siBRCA1 *vs* siCTRL HUVEC. The experiments were conducted in presence of serum. The gene expression levels were calculated using the ΔΔCt method, normalizing to the GAPDH housekeeping gene. Data are expressed as the mean ± SEM of 6 different HUVEC populations.


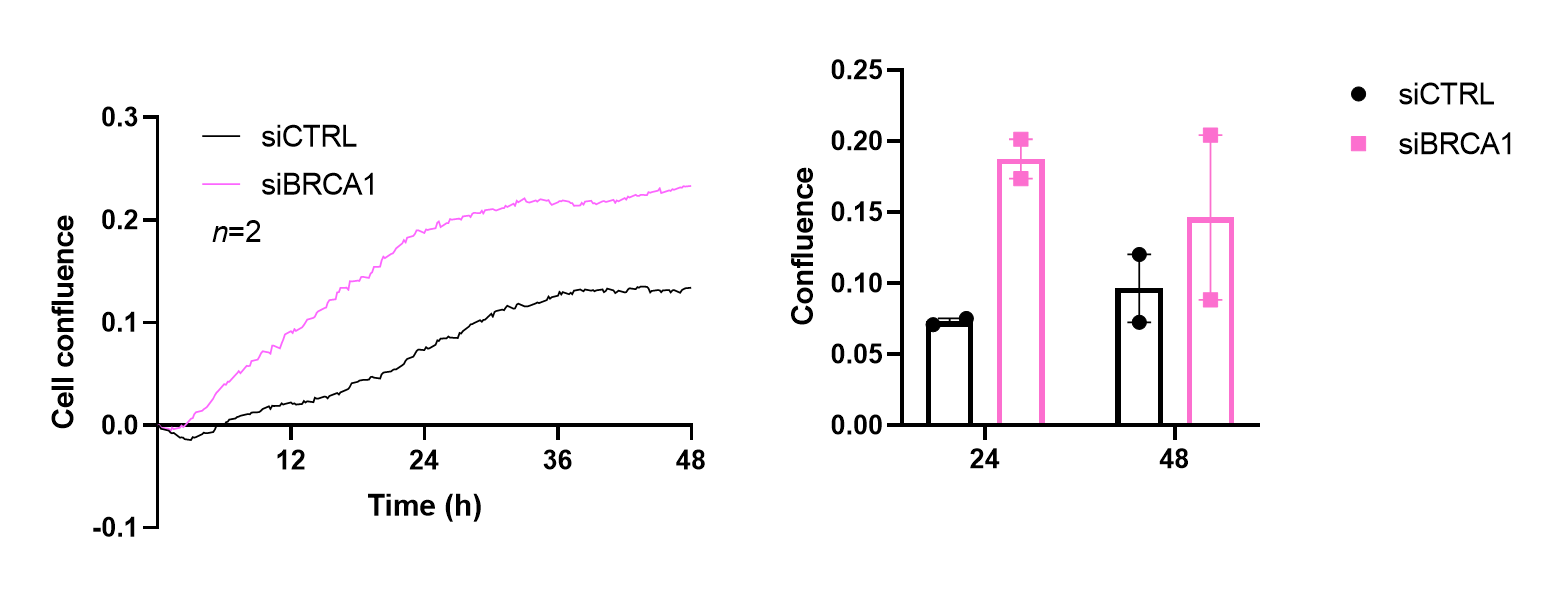


**Supplementary Fig. S9**. Silenced HUVEC were seeded into the chip wells at a concentration of 350 cells/μL and left to adhere in an incubator for 12 to 16h. Subsequently, the cells were subjected to serum starvation using a constant flow rate of 4.09 μL/min for 30 min. After 24h and 48h of starvation, the cell confluence curve and the relative growth of siCTRL and siBRCA1 cells were evaluated. Data are expressed as mean ± SD.


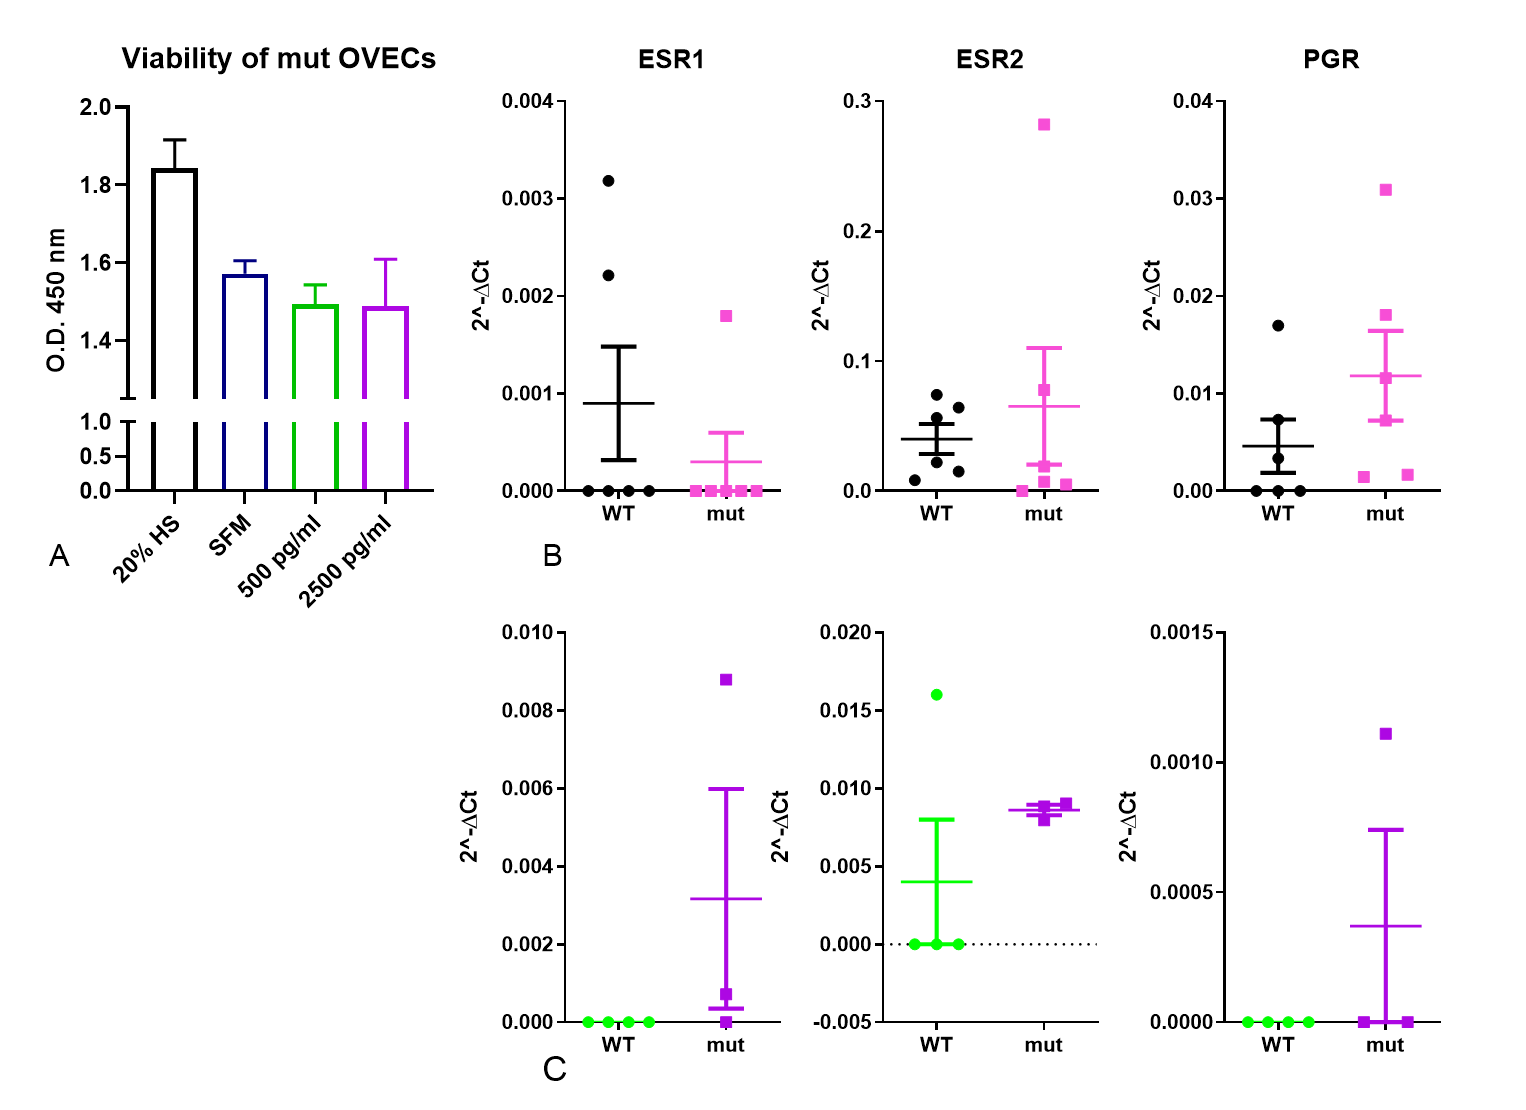


**Supplementary Fig. S10.** (**A**) Viability assays were performed using the MTS assay on mut OVECs, stimulated with different concentration of 17-β estradiol for 24h. Three different populations of mut OVECs were analyzed. The data are presented as mean ± SEM. (**B,C**) RT-qPCR analysis of estrogen and progesterone receptors expressed by WT *vs* mut OVECs (B) or ADMECs (C). The gene expression levels were calculated using the ΔCt method, normalizing to the TBP housekeeping gene. Data are expressed as the mean ± SEM of 6 WT vs 6 mut OVEC populations or 4WT vs 3 mut ADMEC populations.
