# Supplementary material for: The impact of heterozygous BRCA1 mutations on ovarian angiogenesis
Source: Research Square preprint supplement (doi:10.21203/rs.3.rs-7980820/v1), 2025-12-04
Supplement: Supplementary file 3 [file 28a2c4cd813542c81c4e7679.xlsx]

## Sheet: DEGs ABS MUT vs WT
ensembl_transcript_id	ensembl_gene_id	hgnc_symbol	baseMean	log2FoldChange	lfcSE	stat	pvalue	padj
ENST00000006053	ENSG00000006210	CX3CL1	297.24	-3.54802	0.661809	-5.36109	8.27204e-08	3.87836e-06
ENST00000009530	ENSG00000019582	CD74	1370.06	-12.0136	1.91976	-6.25789	3.90228e-10	2.74812e-08
ENST00000016946	ENSG00000015568	RGPD5	321.312	-1.214	0.428386	-2.83388	0.0045986	0.0482329
ENST00000155840	ENSG00000053918	KCNQ1	220.274	-10.3401	2.64477	-3.90963	9.24369e-05	0.00190434
ENST00000162044	ENSG00000064545	TMEM161A	283.181	-11.8687	3.00327	-3.95192	7.75276e-05	0.00162384
ENST00000169298	ENSG00000073849	ST6GAL1	2104.34	-2.19598	0.510898	-4.29827	1.72135e-05	0.000437566
ENST00000173898	ENSG00000067445	TRO	775.801	-11.1924	2.27282	-4.92447	8.45909e-07	3.28904e-05
ENST00000176763	ENSG00000072786	STK10	1864.15	-1.11675	0.395498	-2.82366	0.00474789	0.0494889
ENST00000193322	ENSG00000081087	OSTM1	7275.38	-14.4235	1.48216	-9.73143	2.21464e-22	4.85217e-20
ENST00000200181	ENSG00000132470	ITGB4	565.688	-11.7746	2.78013	-4.23527	2.28278e-05	0.000556699
ENST00000202677	ENSG00000188559	RALGAPA2	1593.12	-2.09354	0.467443	-4.4787	7.50996e-06	0.000215958
ENST00000206423	ENSG00000091986	CCDC80	148.057	3.11484	0.914845	3.40477	0.000662192	0.0100112
ENST00000212355	ENSG00000069702	TGFBR3	688.005	-1.73327	0.507337	-3.4164	0.000634555	0.00962501
ENST00000215061	ENSG00000099330	OCEL1	1250.84	-12.7703	1.59407	-8.01109	1.13692e-15	1.45304e-13
ENST00000215570	ENSG00000099800	TIMM13	578.654	1.1021	0.388676	2.83551	0.00457524	0.0480772
ENST00000215838	ENSG00000185339	TCN2	1265.44	-1.53515	0.502975	-3.05214	0.00227218	0.0273434
ENST00000216259	ENSG00000100417	PMM1	165.634	1.55274	0.502018	3.09301	0.0019814	0.0245946
ENST00000216484	ENSG00000100596	SPTLC2	2442.84	-1.19277	0.39492	-3.02028	0.00252538	0.0298208
ENST00000217740	ENSG00000101695	RNF125	216.839	-2.26817	0.565451	-4.01126	6.03949e-05	0.00131904
ENST00000219197	ENSG00000102924	CBLN1	35.7403	-8.1187	2.06103	-3.93915	8.17694e-05	0.00170359
ENST00000220772	ENSG00000104332	SFRP1	211.572	-2.75376	0.686668	-4.01032	6.06369e-05	0.00132223
ENST00000221315	ENSG00000256087	ZNF432	1500.24	-12.5189	2.04989	-6.10711	1.01453e-09	6.57442e-08
ENST00000221735	ENSG00000105136	ZNF419	364.003	-10.9889	1.57018	-6.99853	2.58667e-12	2.46234e-10
ENST00000222388	ENSG00000285292	ABCF2-H2BK1	473.692	-2.08179	0.414231	-5.02568	5.01653e-07	1.98974e-05
ENST00000222390	ENSG00000019991	HGF	269.157	-5.45265	1.16252	-4.69039	2.72686e-06	9.00452e-05
ENST00000222812	ENSG00000106089	STX1A	67.2651	24.5589	3.00361	8.17647	2.92274e-16	3.95515e-14
ENST00000223145	ENSG00000106415	GLCCI1	42.6439	-2.04137	0.634218	-3.21871	0.00128767	0.0173232
ENST00000223336	ENSG00000106603	COA1	336.615	1.23885	0.396494	3.1245	0.00178109	0.022596
ENST00000224140	ENSG00000107290	SETX	1160.53	-1.61566	0.426165	-3.79115	0.000149949	0.00285877
ENST00000224652	ENSG00000107669	ATE1	185.26	-2.48397	0.665311	-3.73355	0.000188797	0.00346077
ENST00000226760	ENSG00000109501	WFS1	2350.68	-1.5318	0.496588	-3.08464	0.00203799	0.0252064
ENST00000227451	ENSG00000110042	DTX4	96.5548	-3.03738	0.879509	-3.4535	0.000553363	0.00860142
ENST00000227756	ENSG00000110328	GALNT18	628.626	-2.81294	0.537395	-5.2344	1.65523e-07	7.25306e-06
ENST00000228928	ENSG00000111331	OAS3	61008.3	-17.4925	0.864553	-20.233	5.01759e-91	2.30859e-87
ENST00000230538	ENSG00000112769	LAMA4	676.062	-3.21515	0.456532	-7.04254	1.88762e-12	1.84786e-10
ENST00000230882	ENSG00000112964	GHR	43.259	-2.73947	0.802349	-3.41431	0.000639443	0.00968851
ENST00000231461	ENSG00000113532	ST8SIA4	149.126	-1.65001	0.526971	-3.13112	0.0017414	0.0222149
ENST00000231484	ENSG00000113555	PCDH12	1544.6	-2.02648	0.507819	-3.99056	6.59185e-05	0.00141504
ENST00000232888	ENSG00000114767	RRP9	288.354	1.2578	0.435076	2.891	0.0038402	0.0421353
ENST00000233099	ENSG00000008869	HEATR5B	396.968	-1.17279	0.411994	-2.84662	0.00441866	0.0467362
ENST00000233535	ENSG00000115194	SLC30A3	272.96	-4.03144	1.25421	-3.21433	0.00130752	0.0175732
ENST00000233813	ENSG00000115461	IGFBP5	3810.59	5.22523	1.626	3.21354	0.00131107	0.0176039
ENST00000233957	ENSG00000115604	IL18R1	93.903	-1.99651	0.689347	-2.89623	0.00377678	0.0416829
ENST00000234739	ENSG00000116128	BCL9	183.966	-2.51993	0.769039	-3.27673	0.00105018	0.0145831
ENST00000237172	ENSG00000118407	FILIP1	100.28	-3.95632	0.901457	-4.38881	1.13972e-05	0.000307257
ENST00000237612	ENSG00000118777	ABCG2	645.14	-2.12667	0.63353	-3.35685	0.000788359	0.0115565
ENST00000238561	ENSG00000063761	ADCK1	9.10582	-5.08112	1.5968	-3.18207	0.00146228	0.0192227
ENST00000238616	ENSG00000119638	NEK9	178.565	-9.07195	1.68946	-5.36973	7.88536e-08	3.75316e-06
ENST00000238714	ENSG00000115421	PAPOLG	146.435	-2.23222	0.667147	-3.34592	0.000820111	0.0119174
ENST00000238789	ENSG00000119778	ATAD2B	145.692	-1.45863	0.492452	-2.96198	0.00305669	0.0348114
ENST00000241356	ENSG00000282608	ADORA3	48.8198	-8.08674	2.48288	-3.25699	0.00112599	0.015434
ENST00000241416	ENSG00000121989	ACVR2A	107.316	-2.81277	0.870196	-3.23233	0.00122783	0.0166318
ENST00000242057	ENSG00000106546	AHR	2330.56	-1.26833	0.396	-3.20285	0.00136077	0.0181827
ENST00000242804	ENSG00000198342	ZNF442	99.428	-8.2266	0.928722	-8.85798	8.14789e-19	1.38846e-16
ENST00000242810	ENSG00000114796	KLHL24	605.752	-2.21872	0.694073	-3.19667	0.00139024	0.0184508
ENST00000242839	ENSG00000123191	ATP7B	70.4686	-2.16776	0.686701	-3.15677	0.00159528	0.020637
ENST00000243964	ENSG00000124140	SLC12A5	111.822	-8.79209	1.69208	-5.19602	2.03604e-07	8.83757e-06
ENST00000245185	ENSG00000125148	MT2A	7916.91	1.61947	0.41649	3.88838	0.000100914	0.00204841
ENST00000245817	ENSG00000125657	TNFSF9	66.8208	2.66125	0.810674	3.28276	0.00102795	0.0143466
ENST00000245838	ENSG00000125676	THOC2	604.837	-1.26669	0.445621	-2.84251	0.00447592	0.0472694
ENST00000246006	ENSG00000125810	CD93	22151.9	-1.83164	0.445476	-4.11164	3.92856e-05	0.000906788
ENST00000246657	ENSG00000126353	CCR7	40.5493	-7.36893	2.13827	-3.44621	0.000568505	0.00879718
ENST00000246801	ENSG00000126467	TSKS	17.3972	-6.58651	1.60387	-4.10663	4.0147e-05	0.000925124
ENST00000248151	ENSG00000127589	TUBBP1	82.915	-7.96218	1.64759	-4.83263	1.34741e-06	4.86868e-05
ENST00000250024	ENSG00000129173	E2F8	112.562	-3.08539	0.647323	-4.76638	1.87568e-06	6.42431e-05
ENST00000250340	ENSG00000105472	CLEC11A	750.109	1.34172	0.422768	3.17365	0.00150533	0.019639
ENST00000250617	ENSG00000129675	ARHGEF6	6901.86	-14.3485	0.88567	-16.2007	4.98678e-59	2.86802e-56
ENST00000251691	ENSG00000112379	ARFGEF3	194.185	-3.03775	0.496733	-6.11546	9.62767e-10	6.26843e-08
ENST00000251822	ENSG00000008853	RHOBTB2	332.066	-1.80798	0.426494	-4.23916	2.24358e-05	0.000549081
ENST00000252050	ENSG00000112659	CUL9	332.636	-1.29581	0.42612	-3.04095	0.00235837	0.028184
ENST00000252804	ENSG00000130508	PXDN	16136.4	-1.45571	0.409487	-3.55496	0.000378042	0.00624938
ENST00000252979	ENSG00000130684	ZNF337	53.732	-2.38609	0.65782	-3.62727	0.000286434	0.00488105
ENST00000253107	ENSG00000130810	PPAN	131.964	1.47235	0.472547	3.11578	0.0018346	0.0232321
ENST00000253458	ENSG00000131149	GSE1	151.168	-1.48536	0.513847	-2.89067	0.00384423	0.0421461
ENST00000254090	ENSG00000131781	FMO5	229.919	-10.3257	2.03379	-5.07709	3.83251e-07	1.56509e-05
ENST00000254624	ENSG00000132294	EFR3A	1056.29	-1.60875	0.510165	-3.15339	0.00161385	0.0208187
ENST00000255198	ENSG00000132846	ZBED3	390.47	-1.44699	0.453853	-3.18825	0.00143138	0.0188705
ENST00000256190	ENSG00000133812	SBF2	699.565	-2.67679	0.426969	-6.26929	3.62688e-10	2.60738e-08
ENST00000256637	ENSG00000134243	SORT1	804.36	-1.90868	0.484769	-3.93729	8.24073e-05	0.00171048
ENST00000256759	ENSG00000134363	FST	95.7839	3.84085	0.809212	4.7464	2.0707e-06	7.00992e-05
ENST00000256999	ENSG00000086205	FOLH1	84.808	-8.47993	2.26375	-3.74597	0.000179699	0.00332492
ENST00000257570	ENSG00000135114	OASL	157.042	-9.20801	2.63398	-3.49585	0.000472555	0.00752327
ENST00000257776	ENSG00000135324	MRAP2	75.4571	-7.82651	1.25217	-6.25036	4.09512e-10	2.8548e-08
ENST00000258111	ENSG00000135643	KCNMB4	62.2801	-2.59908	0.724324	-3.58828	0.000332868	0.00557595
ENST00000258145	ENSG00000135677	GNS	10235	-2.48011	0.425087	-5.83436	5.39961e-09	3.11844e-07
ENST00000258341	ENSG00000135862	LAMC1	15018	-1.262	0.394069	-3.20248	0.00136251	0.0181883
ENST00000258743	ENSG00000136244	IL6	91.0162	2.29753	0.700474	3.27996	0.00103821	0.0144752
ENST00000259365	ENSG00000136842	TMOD1	82.0599	-3.47824	1.03545	-3.35917	0.000781781	0.0115042
ENST00000259526	ENSG00000136999	CCN3	58.5866	3.16997	0.820453	3.86368	0.000111691	0.00221595
ENST00000259939	ENSG00000137393	RNF144B	1676.28	-1.52214	0.500065	-3.04389	0.0023354	0.0279579
ENST00000259963	ENSG00000137414	FAM8A1	16288.6	-15.9824	1.65684	-9.6463	5.09632e-22	1.06582e-19
ENST00000260197	ENSG00000137642	SORL1	40.4527	-3.07571	0.761695	-4.03798	5.39139e-05	0.00120028
ENST00000260382	ENSG00000137821	LRRC49	27.5685	-6.7968	1.32262	-5.13889	2.76362e-07	1.16299e-05
ENST00000260570	ENSG00000138002	IFT172	250.418	-2.5456	0.618934	-4.11287	3.90766e-05	0.000903475
ENST00000260649	ENSG00000138079	SLC3A1	10.0975	-6.28783	1.72021	-3.65527	0.000256911	0.00445562
ENST00000261205	ENSG00000067715	SYT1	1071.82	-12.02	2.99571	-4.0124	6.01046e-05	0.00131478
ENST00000261233	ENSG00000090376	IRAK3	515.915	-1.41662	0.410758	-3.4488	0.000563083	0.00872305
ENST00000261381	ENSG00000103489	XYLT1	230.824	-2.49677	0.681612	-3.66303	0.000249246	0.0043826
ENST00000261402	ENSG00000074590	NUAK1	3535.47	-1.50644	0.475226	-3.16994	0.00152469	0.019854
ENST00000261405	ENSG00000110799	VWF	111952	-2.40492	0.512341	-4.69398	2.67938e-06	8.87498e-05
ENST00000261486	ENSG00000129595	EPB41L4A	472.754	-1.6846	0.484138	-3.47959	0.00050219	0.00791293
ENST00000261497	ENSG00000124422	USP22	4408.83	-1.44103	0.393783	-3.65946	0.00025275	0.0044105
ENST00000261609	ENSG00000128731	HERC2	764.978	-1.45093	0.439162	-3.30387	0.000953598	0.0134586
ENST00000261839	ENSG00000128833	MYO5C	630.175	-3.37579	0.544815	-6.19621	5.7838e-10	3.85671e-08
ENST00000261858	ENSG00000138604	GLCE	1792.67	-2.4524	0.459369	-5.33862	9.36577e-08	4.30919e-06
ENST00000261861	ENSG00000103647	CORO2B	173.746	-2.2768	0.500887	-4.54554	5.47945e-06	0.000164063
ENST00000261866	ENSG00000104133	SPG11	565.441	-1.2857	0.417908	-3.07651	0.00209441	0.0257717
ENST00000262031	ENSG00000076067	RBMS2	3212.47	-1.33671	0.411524	-3.24819	0.0011614	0.0158878
ENST00000262189	ENSG00000055609	KMT2C	7725.73	-15.3972	0.956116	-16.1039	2.39392e-58	1.32173e-55
ENST00000262215	ENSG00000066777	ARFGEF1	1091.6	-1.27346	0.414448	-3.07267	0.00212153	0.0260529
ENST00000262407	ENSG00000005961	ITGA2B	29.6919	-6.47001	1.53835	-4.20581	2.60145e-05	0.000626663
ENST00000262608	ENSG00000099954	CECR2	360.438	-10.4516	2.41727	-4.32375	1.534e-05	0.000396512
ENST00000262741	ENSG00000117461	PIK3R3	403.968	-3.23995	0.502222	-6.45123	1.10949e-10	8.50793e-09
ENST00000262805	ENSG00000105650	PDE4C	26.4497	-7.28177	2.55393	-2.8512	0.00435542	0.046209
ENST00000262843	ENSG00000080561	MID2	845.078	-1.31298	0.438348	-2.9953	0.00274172	0.0316421
ENST00000262879	ENSG00000170471	RALGAPB	30048.4	-16.4687	2.05572	-8.01117	1.13624e-15	1.45304e-13
ENST00000263125	ENSG00000065675	PRKCQ	228.862	-10.3191	2.03521	-5.0703	3.97197e-07	1.61726e-05
ENST00000263150	ENSG00000047056	WDR37	353.181	-10.9454	1.59732	-6.85235	7.26485e-12	6.51147e-10
ENST00000263253	ENSG00000100393	EP300	1037.68	-2.42583	0.426821	-5.68349	1.31975e-08	7.34536e-07
ENST00000263257	ENSG00000104967	NOVA2	51432.8	-17.244	2.108	-8.18028	2.83177e-16	3.86999e-14
ENST00000263563	ENSG00000107719	PALD1	1662.18	-1.71913	0.486186	-3.53595	0.000406314	0.00662143
ENST00000263635	ENSG00000115183	TANC1	2417.62	-2.19452	0.404116	-5.43043	5.62196e-08	2.79136e-06
ENST00000263708	ENSG00000088179	PTPN4	332.917	-1.58545	0.430514	-3.68268	0.000230791	0.00408936
ENST00000263734	ENSG00000116016	EPAS1	14278.5	-2.2077	0.428562	-5.15142	2.58517e-07	1.09457e-05
ENST00000263754	ENSG00000114166	KAT2B	413.274	-1.23612	0.423231	-2.92068	0.00349273	0.0389419
ENST00000263851	ENSG00000104432	IL7	189.396	-9.64303	2.36732	-4.0734	4.63315e-05	0.0010553
ENST00000263923	ENSG00000128052	KDR	8830.54	-3.17647	0.462061	-6.87458	6.21749e-12	5.64605e-10
ENST00000264033	ENSG00000110395	CBL	1192.94	-1.34711	0.405968	-3.31827	0.00090578	0.0129425
ENST00000264187	ENSG00000116962	NID1	6299.16	-1.64775	0.431481	-3.81883	0.000134085	0.0025994
ENST00000264331	ENSG00000077097	TOP2B	551.695	-1.30525	0.429453	-3.03933	0.00237108	0.0282869
ENST00000264400	ENSG00000138670	RASGEF1B	61.1972	-8.49367	3.00361	-2.82782	0.00468665	0.0489703
ENST00000264447	ENSG00000075292	ZNF638	881.062	-1.71884	0.430455	-3.99308	6.52214e-05	0.00140884
ENST00000264552	ENSG00000108106	UBE2S	2056.33	1.34555	0.424052	3.17307	0.00150835	0.0196599
ENST00000264638	ENSG00000108797	CNTNAP1	801.939	-1.39925	0.42536	-3.28957	0.00100341	0.0140467
ENST00000264930	ENSG00000113504	SLC12A7	537.979	-1.50043	0.496789	-3.02026	0.00252557	0.0298208
ENST00000265074	ENSG00000113389	NPR3	158.366	-9.26417	2.38572	-3.88317	0.000103102	0.00208363
ENST00000265077	ENSG00000038427	VCAN	1481.7	-12.4954	2.12995	-5.8665	4.45102e-09	2.61436e-07
ENST00000265080	ENSG00000113319	RASGRF2	544.025	-1.38586	0.465843	-2.97494	0.00293044	0.0335397
ENST00000265085	ENSG00000113742	CPEB4	103.233	-1.90238	0.520585	-3.65431	0.000257879	0.00446613
ENST00000265138	ENSG00000113369	ARRDC3	1317.34	-1.77425	0.522923	-3.39294	0.000691463	0.0103872
ENST00000265165	ENSG00000138795	LEF1	391.605	-10.2056	2.20647	-4.62531	3.7404e-06	0.000118414
ENST00000265259	ENSG00000213561		36.5574	-6.77345	1.51654	-4.46638	7.95546e-06	0.000226411
ENST00000265294	ENSG00000094755	GABRP	71.631	-9.12314	1.85482	-4.91862	8.71558e-07	3.36978e-05
ENST00000265381	ENSG00000107282	APBA1	110.881	-1.93627	0.565775	-3.42233	0.000620863	0.00945891
ENST00000265598	ENSG00000078081	LAMP3	206.845	-2.14788	0.508865	-4.22092	2.43305e-05	0.000590218
ENST00000265678	ENSG00000071242	RPS6KA2	3517.71	-1.68211	0.478888	-3.51254	0.000443853	0.00711529
ENST00000265717	ENSG00000005249	PRKAR2B	971.813	-2.10332	0.484186	-4.34404	1.39884e-05	0.000368477
ENST00000265986	ENSG00000119912	IDE	21313.2	-16.3908	0.92362	-17.7462	1.84373e-70	1.6966e-67
ENST00000265997	ENSG00000107864	CPEB3	70.2154	-8.61161	1.92933	-4.46352	8.06224e-06	0.000228978
ENST00000266503	ENSG00000029153	BMAL2	245.113	-2.25277	0.684032	-3.29336	0.000989972	0.0138877
ENST00000266671	ENSG00000139289	PHLDA1	1945.51	-12.5214	0.899621	-13.9186	4.88654e-44	1.6451e-41
ENST00000266682	ENSG00000072041	SLC6A15	4301.56	-14.5903	3.00318	-4.85829	1.18403e-06	4.34657e-05
ENST00000267430	ENSG00000187790	FANCM	11.9892	-7.02689	1.86599	-3.76578	0.000166032	0.00310956
ENST00000267460	ENSG00000139946	PELI2	147.104	-2.02605	0.580879	-3.48791	0.000486815	0.00771471
ENST00000267890	ENSG00000128881	TTBK2	299.861	-1.30501	0.428425	-3.04606	0.00231861	0.0277811
ENST00000268138	ENSG00000140534	TICRR	7861.19	-14.5362	0.852525	-17.0508	3.44787e-65	2.50478e-62
ENST00000268182	ENSG00000140575	IQGAP1	8116.91	-2.0068	0.411563	-4.87603	1.08242e-06	4.02712e-05
ENST00000268296	ENSG00000140678	ITGAX	1584.89	-12.2257	0.868523	-14.0764	5.30546e-45	1.87772e-42
ENST00000269391	ENSG00000141576	RNF157	402.583	-10.6111	2.43919	-4.35024	1.35986e-05	0.000359581
ENST00000269499	ENSG00000141664	ZCCHC2	298.204	-2.03502	0.538432	-3.77954	0.000157121	0.00297087
ENST00000269973	ENSG00000124459	ZNF45	83.6659	-1.55651	0.506617	-3.07237	0.00212368	0.0260562
ENST00000270645	ENSG00000142552	RCN3	1663.48	1.32655	0.448113	2.96031	0.00307326	0.0348851
ENST00000271234	ENSG00000137942	FNBP1L	345.885	-5.97994	0.59982	-9.96955	2.07158e-23	4.84644e-21
ENST00000271277	ENSG00000143079	CTTNBP2NL	1239.15	-1.18495	0.380445	-3.11465	0.00184164	0.0232998
ENST00000271588	ENSG00000143341	HMCN1	65.6192	-2.65503	0.659133	-4.02806	5.62387e-05	0.00124202
ENST00000271620	ENSG00000143363	PRUNE1	88.0057	-1.96542	0.685675	-2.86641	0.00415159	0.0446644
ENST00000271715	ENSG00000143442	POGZ	228.427	-1.6363	0.428572	-3.81802	0.000134525	0.00260428
ENST00000271915	ENSG00000143603	KCNN3	556.602	-3.56758	1.15617	-3.08569	0.00203083	0.0251629
ENST00000272133	ENSG00000143786	CNIH3	24.8523	3.41297	1.20263	2.83791	0.00454095	0.0478463
ENST00000272427	ENSG00000144036	EXOC6B	879.727	-1.09806	0.379529	-2.89321	0.00381331	0.0420039
ENST00000272452	ENSG00000198075	SULT1C4	138.761	-3.49037	0.837435	-4.16793	3.07382e-05	0.000732779
ENST00000272793	ENSG00000144357	UBR3	480.827	-1.59156	0.420154	-3.78805	0.000151836	0.00288499
ENST00000272928	ENSG00000144476	ACKR3	380.239	-3.7398	0.509395	-7.34165	2.10983e-13	2.31126e-11
ENST00000273179	ENSG00000144677	CTDSPL	487.759	-1.91817	0.463272	-4.14047	3.46594e-05	0.000817783
ENST00000273371	ENSG00000144837	PLA1A	4008.07	-13.5625	1.95479	-6.93805	3.97535e-12	3.70756e-10
ENST00000273398	ENSG00000114573	ATP6V1A	1250.76	-1.25095	0.403347	-3.10143	0.00192589	0.0240788
ENST00000273990	ENSG00000145358	DDIT4L	178.078	-2.29486	0.588164	-3.90174	9.55032e-05	0.00195874
ENST00000274341	ENSG00000145681	HAPLN1	17.9137	-4.81852	1.56654	-3.07591	0.00209863	0.0257947
ENST00000274364	ENSG00000145703	IQGAP2	1060.91	-11.6464	0.954795	-12.1978	3.19528e-34	9.38392e-32
ENST00000274368	ENSG00000145708	CRHBP	171.053	-9.38067	2.34738	-3.99623	6.43591e-05	0.00139458
ENST00000275016	ENSG00000146233	CYP39A1	822.64	-11.2785	1.38097	-8.16707	3.15967e-16	4.23426e-14
ENST00000275233	ENSG00000146414	SHPRH	103.644	-8.72674	2.85249	-3.05934	0.00221824	0.0269528
ENST00000276646	ENSG00000147642	SYBU	118.58	-2.92961	0.941385	-3.11202	0.00185811	0.0234544
ENST00000280155	ENSG00000150594	ADRA2A	53.8777	-7.33754	1.37615	-5.33193	9.71743e-08	4.44138e-06
ENST00000280527	ENSG00000150938	CRIM1	16335.6	-1.22843	0.433249	-2.8354	0.00457679	0.0480772
ENST00000281282	ENSG00000128849	CGNL1	840.361	-3.42858	0.500657	-6.84815	7.4809e-12	6.66187e-10
ENST00000281419	ENSG00000151693	ASAP2	496.53	-2.65272	0.504905	-5.25391	1.48901e-07	6.56637e-06
ENST00000281441	ENSG00000151715	TMEM45B	105.444	-9.19959	1.72872	-5.32163	1.02843e-07	4.66955e-06
ENST00000281513	ENSG00000151779	NBAS	774.178	-1.82374	0.409473	-4.45388	8.43305e-06	0.00023804
ENST00000281741	ENSG00000087301	TXNDC16	190.092	-1.4023	0.467297	-3.00087	0.0026921	0.0312524
ENST00000281821	ENSG00000116106	EPHA4	143.76	-2.00773	0.505375	-3.97274	7.10496e-05	0.00150877
ENST00000281834	ENSG00000117586	TNFSF4	432.539	1.86064	0.524413	3.54803	0.00038812	0.00637005
ENST00000282397	ENSG00000102755	FLT1	2408.27	-1.66466	0.510189	-3.26282	0.00110308	0.0151802
ENST00000282516	ENSG00000164190	NIPBL	422.584	-1.25038	0.368627	-3.39198	0.000693887	0.0104106
ENST00000282588	ENSG00000213949	ITGA1	139.817	-2.07888	0.561787	-3.70047	0.000215201	0.00385268
ENST00000282633	ENSG00000099290	WASHC2A	1150.5	-1.27818	0.415473	-3.07644	0.0020949	0.0257717
ENST00000283195	ENSG00000153201	RANBP2	1629.36	-1.82505	0.454374	-4.01662	5.90387e-05	0.00129351
ENST00000283296	ENSG00000069122	ADGRF5	10503	-1.80303	0.494484	-3.64628	0.000266059	0.00457907
ENST00000283905	ENSG00000153790	SPMIP4	35.472	-7.62412	1.46357	-5.20928	1.89579e-07	8.2809e-06
ENST00000284425	ENSG00000154262	ABCA6	168.34	-4.19074	0.76905	-5.44925	5.0583e-08	2.54817e-06
ENST00000284503	ENSG00000154328	NEIL2	88.0118	-8.49022	2.83078	-2.99925	0.00270646	0.0313926
ENST00000286063	ENSG00000128655	PDE11A	17.3702	-5.68389	1.6449	-3.45546	0.000549356	0.00855843
ENST00000286614	ENSG00000156103	MMP16	484.818	-1.67748	0.430788	-3.89398	9.8611e-05	0.0020135
ENST00000287097	ENSG00000156535	CD109	2522.57	-1.43435	0.444614	-3.22606	0.00125506	0.0169672
ENST00000287706	ENSG00000157045	NTAN1	5970.91	-14.5558	0.942416	-15.4452	8.12373e-54	3.61716e-51
ENST00000288135	ENSG00000157404	KIT	1987.07	-13.6915	3.00319	-4.55898	5.14022e-06	0.000155593
ENST00000288368	ENSG00000046889	PREX2	1045.04	-2.43272	0.51224	-4.74918	2.04242e-06	6.94374e-05
ENST00000288670	ENSG00000157827	FMNL2	2019.94	-1.24903	0.414273	-3.01499	0.0025699	0.0301019
ENST00000289575	ENSG00000137491	SLCO2B1	1331.43	-12.2733	2.26787	-5.41184	6.23788e-08	3.03174e-06
ENST00000289788	ENSG00000187987	ZSCAN23	60.6294	-7.91406	1.34454	-5.88606	3.95518e-09	2.35316e-07
ENST00000290271	ENSG00000159167	STC1	2401.29	-1.82035	0.449017	-4.05407	5.03342e-05	0.0011297
ENST00000290607	ENSG00000159433	STARD9	274.946	-1.72736	0.458822	-3.76477	0.000166706	0.00311794
ENST00000290866	ENSG00000159640	ACE	2147.32	-1.92412	0.578093	-3.32839	0.000873507	0.0125594
ENST00000291281	ENSG00000105287	PRKD2	787.315	-1.54398	0.464235	-3.32586	0.000881468	0.0126475
ENST00000291539	ENSG00000160191	PDE9A	152.56	-9.15637	2.99396	-3.05829	0.00222608	0.0270005
ENST00000291634	ENSG00000160256	SLX9	163.33	1.2967	0.432487	2.99824	0.00271545	0.0314705
ENST00000292641	ENSG00000161055	SCGB3A1	39.3821	-7.77449	1.50492	-5.16603	2.39114e-07	1.01553e-05
ENST00000292841	ENSG00000196967	ZNF585A	108.629	-8.78127	1.18817	-7.39056	1.46212e-13	1.61453e-11
ENST00000293709	ENSG00000168468	ATF6B	12662.1	-16.2532	3.00318	-5.41201	6.23202e-08	3.03174e-06
ENST00000293879	ENSG00000161996	WDR90	508.237	-10.9519	2.47819	-4.41931	9.90175e-06	0.000272259
ENST00000294016	ENSG00000162104	ADCY9	552.229	-1.25171	0.414329	-3.02106	0.00251893	0.0298125
ENST00000294428	ENSG00000162437	RAVER2	641.449	-10.9179	2.25637	-4.83871	1.30688e-06	4.7346e-05
ENST00000294618	ENSG00000130158	DOCK6	1530.65	-1.56686	0.470663	-3.32904	0.000871454	0.0125429
ENST00000294785	ENSG00000162736	NCSTN	2626.29	-1.34585	0.400562	-3.3599	0.000779703	0.0114859
ENST00000294984	ENSG00000162892	IL24	46.2588	-8.00882	2.42727	-3.29951	0.000968531	0.0136503
ENST00000295190	ENSG00000163053	SLC16A14	145.62	-9.20434	1.1739	-7.84082	4.47631e-15	5.51665e-13
ENST00000295228	ENSG00000163083	INHBB	191.475	-3.47028	0.834946	-4.1563	3.23446e-05	0.000769745
ENST00000295408	ENSG00000153208	MERTK	529.213	-3.41104	0.5565	-6.12944	8.81887e-10	5.79652e-08
ENST00000295598	ENSG00000163399	ATP1A1	11103.9	-1.17538	0.389783	-3.01546	0.00256586	0.0301019
ENST00000295754	ENSG00000163513	TGFBR2	12583.3	-1.47517	0.435377	-3.38826	0.000703382	0.0105187
ENST00000295888	ENSG00000163625	WDFY3	757.8	-1.71068	0.443843	-3.85424	0.00011609	0.00229568
ENST00000295924	ENSG00000163659	TIPARP	2041.05	-2.64845	0.525837	-5.03664	4.73781e-07	1.88461e-05
ENST00000295956	ENSG00000136068	FLNB	9509.97	-1.71428	0.435314	-3.93804	8.21509e-05	0.00170772
ENST00000296051	ENSG00000163755	HPS3	505.435	-1.27046	0.41792	-3.03995	0.00236618	0.0282529
ENST00000296088	ENSG00000163788	SNRK	4411.39	-2.06675	0.431919	-4.78505	1.70948e-06	5.91379e-05
ENST00000296137	ENSG00000163820	FYCO1	786.438	-1.92396	0.42258	-4.55289	5.29149e-06	0.000159481
ENST00000296440	ENSG00000164050	PLXNB1	3376.2	-14.2453	2.60591	-5.46652	4.58946e-08	2.34623e-06
ENST00000296585	ENSG00000164171	ITGA2	2542.3	-1.31271	0.431965	-3.03893	0.00237419	0.0282996
ENST00000296721	ENSG00000157510	AFAP1L1	2077.69	-1.68943	0.510276	-3.31082	0.000930225	0.0131691
ENST00000296953	ENSG00000164463	CREBRF	275.458	-1.68527	0.515243	-3.27083	0.00107233	0.0148014
ENST00000297029	ENSG00000006747	SCIN	21.5315	-3.74697	1.16339	-3.22072	0.00127868	0.0172529
ENST00000297625	ENSG00000164976	MYORG	390.203	-1.37075	0.427508	-3.20638	0.00134418	0.0179958
ENST00000298375	ENSG00000165568	AKR1E2	377.358	-10.1534	1.39996	-7.25264	4.08722e-13	4.21014e-11
ENST00000298552	ENSG00000165699	TSC1	7846.71	-15.5653	2.34987	-6.6239	3.49832e-11	2.82382e-09
ENST00000298943	ENSG00000165985	C1QL3	57.7845	-7.84564	1.21564	-6.45392	1.08995e-10	8.44165e-09
ENST00000299045	ENSG00000166046	TCP11L2	164.894	-2.66413	0.514504	-5.17806	2.2421e-07	9.58135e-06
ENST00000299106	ENSG00000166086	JAM3	1297.67	-1.59977	0.403526	-3.96449	7.35532e-05	0.00155001
ENST00000299333	ENSG00000166257	SCN3B	658.414	-11.8443	1.73303	-6.83444	8.23287e-12	7.23811e-10
ENST00000299353	ENSG00000270316	BORCS7-ASMT	53.6159	-9.46615	3.00367	-3.15152	0.00162421	0.0209327
ENST00000299427	ENSG00000166340	TPP1	5372.26	-2.19163	0.431046	-5.08444	3.68704e-07	1.51015e-05
ENST00000299441	ENSG00000166341	DCHS1	1828.78	-1.45077	0.465594	-3.11595	0.00183355	0.0232321
ENST00000299505	ENSG00000166398	GARRE1	1115.05	-1.73664	0.406258	-4.27472	1.91375e-05	0.000480282
ENST00000299759	ENSG00000166592	RRAD	38.2641	3.25562	0.827564	3.93398	8.35506e-05	0.00173161
ENST00000299824	ENSG00000101445	PPP1R16B	3046.9	-1.92961	0.552218	-3.4943	0.000475313	0.00755692
ENST00000299847	ENSG00000166664	CHRFAM7A	466.799	-10.8999	1.93145	-5.64339	1.66732e-08	9.13254e-07
ENST00000299957	ENSG00000166734	GOLM2	788.338	-2.42379	0.662897	-3.65636	0.000255818	0.00445279
ENST00000300061	ENSG00000166828	SCNN1G	41.9221	-7.86597	1.29377	-6.07989	1.20266e-09	7.75714e-08
ENST00000300650	ENSG00000167257	RNF214	3954.65	-13.544	1.47293	-9.19528	3.74025e-20	6.97657e-18
ENST00000301190	ENSG00000167612	ANKRD33	265.516	-9.64399	2.65382	-3.63401	0.000279054	0.00478483
ENST00000301242	ENSG00000167641	PPP1R14A	126.398	3.29123	0.682536	4.82207	1.4208e-06	5.08063e-05
ENST00000301246	ENSG00000167644	C19orf33	120.762	2.87504	0.65328	4.40093	1.07786e-05	0.000292867
ENST00000301732	ENSG00000167972	ABCA3	1108.13	-2.15654	0.556608	-3.87444	0.000106871	0.00214184
ENST00000302085	ENSG00000170365	SMAD1	1984.22	-1.44334	0.454374	-3.17654	0.00149042	0.0194813
ENST00000302190	ENSG00000169439	SDC2	291.777	2.29086	0.626734	3.65523	0.00025695	0.00445562
ENST00000302541	ENSG00000170011	MYRIP	9184.56	-15.1957	1.65499	-9.18173	4.24221e-20	7.80736e-18
ENST00000303068	ENSG00000135063	ENTREP1	16.7962	-4.02072	1.12805	-3.5643	0.000364828	0.00605984
ENST00000303088	ENSG00000064490	RFXANK	588.268	-11.158	2.48593	-4.48845	7.17426e-06	0.000207602
ENST00000303296	ENSG00000110422	HIPK3	355.021	-1.9256	0.487022	-3.95383	7.6909e-05	0.00161579
ENST00000304141	ENSG00000168497	CAVIN2	4149.74	-1.37017	0.477657	-2.86853	0.00412384	0.0444698
ENST00000304698	ENSG00000144369	FAM171B	454.65	-1.26849	0.434992	-2.91613	0.00354407	0.0394189
ENST00000304760	ENSG00000169291	SHE	2279.35	-1.48089	0.518042	-2.85864	0.00425464	0.0455246
ENST00000304800	ENSG00000168701	TMEM208	250.824	1.10368	0.387435	2.84869	0.00438999	0.0465399
ENST00000304916	ENSG00000168672	LRATD2	781.946	-1.77581	0.552709	-3.21292	0.00131394	0.0176081
ENST00000304952	ENSG00000188290	HES4	138.881	1.76174	0.604205	2.91579	0.00354787	0.0394293
ENST00000304992	ENSG00000174231	PRPF8	3433.36	-1.94268	0.402869	-4.82212	1.42038e-06	5.08063e-05
ENST00000305108	ENSG00000171840	NINJ2	47.723	-8.53717	2.06864	-4.12696	3.67598e-05	0.000861452
ENST00000305544	ENSG00000172037	LAMB2	6619.92	-1.21953	0.426493	-2.85944	0.00424391	0.0455157
ENST00000305817	ENSG00000171864	PRND	146.549	-6.20356	0.913297	-6.79249	1.10217e-11	9.44923e-10
ENST00000305883	ENSG00000172059	KLF11	372.509	-4.12301	0.612784	-6.72833	1.71621e-11	1.44444e-09
ENST00000306467	ENSG00000168944	CEP120	3146.14	-13.2125	2.41412	-5.47302	4.42435e-08	2.27871e-06
ENST00000306801	ENSG00000141564	RPTOR	530.55	-1.73044	0.446664	-3.87414	0.000107002	0.00214184
ENST00000306901	ENSG00000175344	CHRNA7	42.8242	-3.2675	1.02148	-3.19879	0.00138007	0.0183517
ENST00000307078	ENSG00000168646	AXIN2	148.443	-9.69417	2.01184	-4.81856	1.446e-06	5.11773e-05
ENST00000307145	ENSG00000169926	KLF13	1000.58	-1.62604	0.530735	-3.06376	0.00218574	0.0266517
ENST00000308031	ENSG00000196263	ZNF471	1497.42	-12.1437	0.864615	-14.0452	8.23795e-45	2.84271e-42
ENST00000308159	ENSG00000102900	NUP93	16.1684	-6.48427	1.63423	-3.96779	7.25408e-05	0.00153336
ENST00000308191	ENSG00000171408	PDE7B	1381.18	-13.0561	2.90729	-4.4908	7.0955e-06	0.000206623
ENST00000308197	ENSG00000135469	COQ10A	42.018	-2.93702	0.866945	-3.38778	0.000704614	0.0105235
ENST00000308418	ENSG00000172922	RNASEH2C	83.9422	-2.84634	0.904131	-3.14815	0.00164308	0.0211562
ENST00000308497	ENSG00000173320	STOX2	49.4586	-2.64171	0.830536	-3.18073	0.00146905	0.0192566
ENST00000308744	ENSG00000056291	NPFFR2	138.536	-9.66742	3.00337	-3.21886	0.00128701	0.0173232
ENST00000308979	ENSG00000174125	TLR1	1539.64	-13.3234	3.00319	-4.43643	9.14639e-06	0.000254919
ENST00000309042	ENSG00000084093	REST	487.424	-1.8569	0.459154	-4.04418	5.25061e-05	0.00117083
ENST00000309235	ENSG00000173258	ZNF483	22.1345	-2.26724	0.79258	-2.86058	0.00422867	0.0453876
ENST00000309451	ENSG00000173272	MZT2A	701.849	1.24587	0.398441	3.12685	0.0017669	0.0224649
ENST00000309755	ENSG00000146021	KLHL3	195.365	-2.82314	0.519583	-5.43347	5.52684e-08	2.76771e-06
ENST00000310389	ENSG00000175414	ARL10	243.555	-1.37155	0.445492	-3.07872	0.0020789	0.025654
ENST00000310397	ENSG00000162804	SNED1	1457.11	-2.16827	0.534065	-4.05995	4.90835e-05	0.00110884
ENST00000310455	ENSG00000173281	PPP1R3B	1176.62	-1.67651	0.451644	-3.71201	0.000205617	0.00370513
ENST00000310833	ENSG00000174059	CD34	1374.94	-3.14805	1.05944	-2.97142	0.00296421	0.0338701
ENST00000311066	ENSG00000116731	PRDM2	69.9853	-1.92957	0.645167	-2.99081	0.00278235	0.0320307
ENST00000311117	ENSG00000005483	KMT2E	856.338	-1.55485	0.412553	-3.76884	0.000164009	0.00308002
ENST00000311160	ENSG00000136205	TNS3	954.174	-1.35258	0.467625	-2.89244	0.00382261	0.0420189
ENST00000311331	ENSG00000197566	ZNF624	76.8248	-1.89513	0.549364	-3.44969	0.000561235	0.00871398
ENST00000311549	ENSG00000122026	RPL21	10285.5	1.03618	0.364324	2.84412	0.00445342	0.0470678
ENST00000311990	ENSG00000293382		74.9968	-9.19001	2.89965	-3.16935	0.00152779	0.0198756
ENST00000312561	ENSG00000174718	RESF1	1495.82	-1.82521	0.430659	-4.23818	2.25342e-05	0.000550512
ENST00000312828	ENSG00000176641	RNF152	331.211	-1.80572	0.5196	-3.47522	0.000510438	0.00803373
ENST00000313434	ENSG00000176293	ZNF135	399.172	-10.2332	2.21313	-4.62387	3.76654e-06	0.000118698
ENST00000313597	ENSG00000144591	GMPPA	207.063	1.51787	0.463479	3.27494	0.00105684	0.0146608
ENST00000313708	ENSG00000164330	EBF1	144.024	-4.12141	1.3695	-3.00944	0.00261731	0.0305382
ENST00000313961	ENSG00000143248	RGS5	2247.98	-3.57025	0.950356	-3.75675	0.000172133	0.00321508
ENST00000314073	ENSG00000112624	BICRAL	312.854	-2.67563	0.614747	-4.35241	1.34651e-05	0.000356734
ENST00000314128	ENSG00000170581	STAT2	345.223	-1.61718	0.44541	-3.63077	0.000282581	0.00483801
ENST00000314191	ENSG00000253729	PRKDC	2107.56	-1.98841	0.524944	-3.78786	0.000151952	0.00288499
ENST00000314250	ENSG00000111077	TNS2	1346.87	-1.82051	0.40828	-4.45898	8.23517e-06	0.000233409
ENST00000314328	ENSG00000100014	SPECC1L	38173.4	-16.816	0.861956	-19.5091	9.17991e-85	1.81015e-81
ENST00000314358	ENSG00000120733	KDM3B	981.723	-1.78615	0.40945	-4.36231	1.28695e-05	0.000343592
ENST00000314425	ENSG00000147130	ZMYM3	602.718	-1.10072	0.383983	-2.8666	0.00414913	0.0446644
ENST00000314607	ENSG00000146463	ZMYM4	1042.14	-1.46544	0.398341	-3.67886	0.00023428	0.00414585
ENST00000315872	ENSG00000134318	ROCK2	1329.73	-1.28389	0.42844	-2.99666	0.00272953	0.0315542
ENST00000315927	ENSG00000180667	YOD1	123.594	-1.78641	0.607826	-2.93902	0.00329256	0.036859
ENST00000316185	ENSG00000133460	SLC2A11	30.0039	-2.42043	0.788042	-3.07145	0.00213025	0.0260904
ENST00000316403	ENSG00000120885	CLU	1209.12	-2.03452	0.606568	-3.35415	0.000796091	0.0116403
ENST00000316407	ENSG00000176542	USF3	310.913	-1.35208	0.472123	-2.86383	0.00418555	0.0449946
ENST00000316694	ENSG00000176974	SHMT1	130.412	-10.4705	2.62474	-3.98914	6.63144e-05	0.00142133
ENST00000316902	ENSG00000092068	SLC7A8	202.514	-10.1425	2.08076	-4.87444	1.09119e-06	4.04885e-05
ENST00000317135	ENSG00000130224	LRCH2	143.023	-1.94402	0.521993	-3.72423	0.000195909	0.00356275
ENST00000317744	ENSG00000179314	WSCD1	654.328	-2.10828	0.475841	-4.43064	9.39536e-06	0.000260219
ENST00000317827	ENSG00000147526	TACC1	2433.83	-1.92088	0.416949	-4.60699	4.08549e-06	0.000127009
ENST00000317991	ENSG00000089351	GRAMD1A	572.864	-11.1617	1.15935	-9.6276	6.11434e-22	1.25965e-19
ENST00000318109	ENSG00000099958	DERL3	9.81409	-6.24541	1.84311	-3.38852	0.000702708	0.0105187
ENST00000318130	ENSG00000116406	EDEM3	55001	-17.3429	0.861263	-20.1366	3.52647e-90	1.2169e-86
ENST00000318217	ENSG00000176658	MYO1D	1742.87	-1.4314	0.41867	-3.41892	0.000628713	0.0095574
ENST00000318238	ENSG00000177409	SAMD9L	664.531	-1.74256	0.438014	-3.97832	6.94043e-05	0.00148066
ENST00000318357	ENSG00000163126	ANKRD23	100.251	-8.60415	2.85394	-3.01484	0.00257119	0.0301019
ENST00000318410	ENSG00000164961	WASHC5	1197.29	-1.86385	0.397076	-4.69393	2.68002e-06	8.87498e-05
ENST00000318442	ENSG00000178175	ZNF366	1304.7	-2.00255	0.497779	-4.02296	5.74708e-05	0.00126317
ENST00000318522	ENSG00000143924	EML4	745.03	-1.44093	0.451679	-3.19015	0.00142198	0.0187644
ENST00000318934	ENSG00000089847	ANKRD24	59.3379	-8.36875	2.46218	-3.39892	0.000676525	0.0102055
ENST00000318948	ENSG00000180530	NRIP1	627.463	-1.44652	0.46703	-3.09727	0.00195313	0.0243077
ENST00000318967	ENSG00000143624	INTS3	37262.8	-17.1761	1.66672	-10.3053	6.6663e-25	1.70398e-22
ENST00000319170	ENSG00000173166	RAPH1	2051.81	-1.69348	0.413667	-4.09381	4.24335e-05	0.000974558
ENST00000319217	ENSG00000107186	MPDZ	999.598	-2.43033	0.436406	-5.56895	2.56274e-08	1.36577e-06
ENST00000319420	ENSG00000180730	SHISA2	107.985	-2.52675	0.720466	-3.5071	0.000453018	0.00723728
ENST00000319481	ENSG00000141447	OSBPL1A	263.149	-1.4168	0.481224	-2.94415	0.00323845	0.0363713
ENST00000320356	ENSG00000106462	EZH2	568.963	-11.1642	0.951764	-11.73	8.95011e-32	2.47077e-29
ENST00000320431	ENSG00000176020	AMIGO3	116.177	-10.5689	2.97544	-3.55204	0.000382264	0.00629641
ENST00000320560	ENSG00000177119	ANO6	1653.57	-1.76877	0.407018	-4.34568	1.38845e-05	0.000366439
ENST00000320816	ENSG00000153071	DAB2	3399.43	-1.38422	0.412219	-3.35797	0.00078518	0.01153
ENST00000321037	ENSG00000001561	ENPP4	94.9701	-3.55935	0.720787	-4.93814	7.88697e-07	3.07525e-05
ENST00000321196	ENSG00000179104	TMTC2	105.514	-2.18775	0.551052	-3.97013	7.18327e-05	0.00152072
ENST00000321535	ENSG00000177294	FBXO39	14.9768	-5.46654	1.50664	-3.6283	0.000285296	0.00487272
ENST00000321854	ENSG00000181513	ACBD4	1202.66	-11.8265	1.40047	-8.44467	3.04914e-17	4.52551e-15
ENST00000323076	ENSG00000136167	LCP1	38.4174	-3.27909	1.11519	-2.94038	0.00327809	0.0367269
ENST00000323267	ENSG00000137216	TMEM63B	542.281	-1.24191	0.409024	-3.03628	0.00239518	0.0284515
ENST00000323469	ENSG00000176490	DIRAS1	20.5871	4.7464	1.31842	3.60007	0.00031813	0.00536159
ENST00000323776	ENSG00000136449	MYCBPAP	282.896	-11.1064	2.37685	-4.67274	2.97212e-06	9.5851e-05
ENST00000323798	ENSG00000104812	GYS1	1006.12	-1.26485	0.413067	-3.0621	0.00219791	0.0267529
ENST00000323853	ENSG00000144028	SNRNP200	3084.58	-1.61927	0.401914	-4.02888	5.60424e-05	0.00123967
ENST00000324093	ENSG00000004399	PLXND1	14568.1	-1.55698	0.464291	-3.35345	0.000798117	0.0116576
ENST00000324109	ENSG00000107554	DNMBP	1738.89	-2.27449	0.4258	-5.34167	9.20917e-08	4.25131e-06
ENST00000324210	ENSG00000152601	MBNL1	2699.19	-2.26413	0.462572	-4.89466	9.84763e-07	3.70373e-05
ENST00000324306	ENSG00000106261	ZKSCAN1	969.858	-2.03762	0.435871	-4.67482	2.94213e-06	9.53291e-05
ENST00000324348	ENSG00000179859	RNF227	18.6698	-2.65382	0.92071	-2.88236	0.00394705	0.0428648
ENST00000324768	ENSG00000175874	CREG2	17.3289	-3.27885	1.02771	-3.19045	0.0014205	0.0187628
ENST00000324932	ENSG00000110713	NUP98	65873.6	-17.6032	0.848524	-20.7456	1.34243e-95	9.26475e-92
ENST00000325006	ENSG00000158467	AHCYL2	65.9354	-2.12473	0.752622	-2.8231	0.00475618	0.0495095
ENST00000325110	ENSG00000112972	HMGCS1	37.7719	-2.32786	0.803781	-2.89614	0.00377783	0.0416829
ENST00000325212	ENSG00000166004	CEP295	222.895	-2.0373	0.456077	-4.467	7.93233e-06	0.000226411
ENST00000325464	ENSG00000175221	MED16	75.5456	-9.68285	1.67313	-5.78726	7.15437e-09	4.08065e-07
ENST00000325680	ENSG00000119596	YLPM1	408.566	-1.98505	0.423978	-4.68196	2.84151e-06	9.317e-05
ENST00000326132	ENSG00000138942	RNF185	611.213	-1.21823	0.409936	-2.97174	0.00296113	0.0338628
ENST00000326294	ENSG00000213402	PTPRCAP	214.416	-9.33572	2.12973	-4.38352	1.16774e-05	0.000313587
ENST00000326505	ENSG00000176597	B3GNT5	1562.72	-1.27881	0.411449	-3.10807	0.00188313	0.0236945
ENST00000326577	ENSG00000006327	TNFRSF12A	1309.68	1.48919	0.449421	3.31358	0.000921096	0.0130936
ENST00000326631	ENSG00000104886	PLEKHJ1	337.833	1.24039	0.405708	3.05736	0.00223296	0.0270601
ENST00000326648	ENSG00000180357	ZNF609	1426.58	-1.09056	0.378854	-2.87859	0.00399458	0.0432449
ENST00000326775	ENSG00000196652	ZKSCAN5	106.254	-9.21101	1.94069	-4.74627	2.07205e-06	7.00992e-05
ENST00000327423	ENSG00000183530	PRR14L	577.083	-1.37469	0.409127	-3.36006	0.000779247	0.0114859
ENST00000327443	ENSG00000185591	SP1	782.917	-4.68236	0.606786	-7.71666	1.19415e-14	1.42094e-12
ENST00000328046	ENSG00000174010	KLHL15	2545.08	-13.2728	2.99587	-4.43037	9.40734e-06	0.000260219
ENST00000328194	ENSG00000184014	DENND5A	950.986	-1.34438	0.403994	-3.32772	0.000875593	0.0125763
ENST00000328649	ENSG00000185043	CIB1	971.281	1.08575	0.374709	2.89759	0.0037604	0.0415571
ENST00000328913	ENSG00000053524	MCF2L2	347.482	-10.4327	1.47269	-7.0841	1.39952e-12	1.38639e-10
ENST00000328939	ENSG00000182132	KCNIP1	230.759	-9.73093	2.97448	-3.27147	0.0010699	0.0147827
ENST00000329542	ENSG00000113763	UNC5A	83.6713	-2.71789	0.63861	-4.25595	2.08164e-05	0.000513087
ENST00000330236	ENSG00000198315	ZKSCAN8	432.156	-1.66691	0.41326	-4.03356	5.49373e-05	0.00121717
ENST00000330333	ENSG00000182240	BACE2	2069.35	-1.43913	0.481615	-2.98814	0.00280682	0.0322854
ENST00000330619	ENSG00000197016	ZNF470	97.9832	-2.92041	0.646271	-4.51887	6.2171e-06	0.000182197
ENST00000330753	ENSG00000185070	FLRT2	26.7561	-3.80117	1.20167	-3.16323	0.00156029	0.0202413
ENST00000330877	ENSG00000185100	ADSS1	100.694	-8.68275	1.77938	-4.87964	1.06279e-06	3.96696e-05
ENST00000330947	ENSG00000197147	LRRC8B	860.311	-1.47725	0.410275	-3.60064	0.000317437	0.00536127
ENST00000331342	ENSG00000182600	SNORC	59.0792	-8.84535	1.26062	-7.01664	2.27272e-12	2.20918e-10
ENST00000331437	ENSG00000183307	TMEM121B	61.9075	-8.42973	1.90026	-4.4361	9.1603e-06	0.000254919
ENST00000331817	ENSG00000135480	KRT7	4409.43	1.87296	0.59606	3.14223	0.00167669	0.0215287
ENST00000331886	ENSG00000065357	DGKA	29742.5	-16.4548	1.54543	-10.6474	1.79214e-26	4.66734e-24
ENST00000332512	ENSG00000183421	RIPK4	21.1826	5.29883	1.61574	3.2795	0.00103991	0.0144842
ENST00000332517	ENSG00000184108	TRIML1	24.7556	-7.58683	1.67754	-4.5226	6.10857e-06	0.000180164
ENST00000332539	ENSG00000183134	PTGDR2	58.6431	-7.86065	1.98269	-3.96465	7.3505e-05	0.00155001
ENST00000332585	ENSG00000184792	OSBP2	1006.57	-4.99044	0.620116	-8.04759	8.44399e-16	1.11002e-13
ENST00000332947	ENSG00000183114	FAM43B	10.5859	-5.86221	1.90889	-3.07101	0.00213338	0.0261056
ENST00000332981	ENSG00000027075	PRKCH	1404.94	-1.84275	0.478702	-3.84947	0.000118371	0.00232746
ENST00000333244	ENSG00000185567	AHNAK2	972.392	-2.2642	0.477574	-4.74104	2.1262e-06	7.17554e-05
ENST00000333676	ENSG00000262814	MRPL12	1211.02	1.26424	0.386944	3.26724	0.00108601	0.0149752
ENST00000334025	ENSG00000186479	RGS7BP	345.635	-3.40407	0.758088	-4.49034	7.11087e-06	0.000206634
ENST00000334136	ENSG00000094631	HDAC6	3418.03	-14.3592	2.28895	-6.27329	3.53495e-10	2.5546e-08
ENST00000334186	ENSG00000177380	PPFIA3	62.0466	-8.43278	2.48935	-3.38754	0.000705229	0.0105235
ENST00000334344	ENSG00000189079	ARID2	272.341	-1.3335	0.462075	-2.8859	0.00390301	0.0425539
ENST00000334414	ENSG00000127329	PTPRB	1506.9	-1.65114	0.460731	-3.58374	0.000338705	0.00566684
ENST00000334512	ENSG00000108175	ZMIZ1	1971.97	-1.31694	0.396872	-3.31829	0.000905714	0.0129425
ENST00000334634	ENSG00000163462	TRIM46	1013.77	-12.467	2.19871	-5.67015	1.4267e-08	7.87711e-07
ENST00000334678	ENSG00000187051	RPS19BP1	795.198	1.19298	0.38641	3.08735	0.00201949	0.025045
ENST00000335670	ENSG00000069667	RORA	360.328	-1.91384	0.474286	-4.0352	5.45554e-05	0.00121066
ENST00000335953	ENSG00000109906	ZBTB16	396.32	-1.97882	0.540435	-3.66153	0.00025071	0.00439156
ENST00000336128	ENSG00000188785	ZNF548	142.649	-2.18583	0.632739	-3.45456	0.000551195	0.00857739
ENST00000336278	ENSG00000168807	SNTB2	1818.19	-1.27607	0.399213	-3.19645	0.0013913	0.0184508
ENST00000336454	ENSG00000079335	CDC14A	227.283	-1.37883	0.456811	-3.01839	0.00254124	0.029929
ENST00000336727	ENSG00000159788	RGS12	136.797	-2.10562	0.542654	-3.88023	0.000104359	0.00210287
ENST00000336866	ENSG00000125510	OPRL1	1015.55	-11.9503	2.55289	-4.68107	2.85376e-06	9.33423e-05
ENST00000336926	ENSG00000127946	HIP1	1524.26	-1.24007	0.396821	-3.12502	0.00177796	0.0225769
ENST00000337488	ENSG00000145216	FIP1L1	113.79	-3.14117	0.914004	-3.43671	0.000588824	0.0090306
ENST00000337979	ENSG00000166900	STX3	218.473	-1.39175	0.471612	-2.95106	0.00316687	0.0357126
ENST00000338037	ENSG00000182621	PLCB1	8552.89	-14.6579	0.873976	-16.7715	3.94215e-63	2.59112e-60
ENST00000338154	ENSG00000172943	PHF8	176.563	-2.07006	0.45636	-4.53603	5.73236e-06	0.000170525
ENST00000338244	ENSG00000089057	SLC23A2	1078.51	-1.97101	0.413834	-4.76281	1.90914e-06	6.52275e-05
ENST00000338382	ENSG00000188352	FOCAD	657.841	-1.60023	0.427902	-3.73971	0.00018423	0.00339509
ENST00000338448	ENSG00000099864	PALM	1376.67	-1.69709	0.508013	-3.34064	0.000835856	0.012119
ENST00000338595	ENSG00000065621	GSTO2	93.4487	-9.16871	3.00346	-3.05271	0.00226781	0.0273385
ENST00000338745	ENSG00000182568	SATB1	130.457	-2.42872	0.559725	-4.33914	1.43041e-05	0.000373938
ENST00000338821	ENSG00000054793	ATP9A	938.039	-2.72178	0.540267	-5.03784	4.70819e-07	1.87824e-05
ENST00000338965	ENSG00000188211	NCR3LG1	121.446	-1.69994	0.493456	-3.44497	0.000571113	0.00882762
ENST00000339266	ENSG00000080845	DLGAP4	19.7488	-5.87394	1.44876	-4.05448	5.02466e-05	0.00112957
ENST00000339276	ENSG00000175793	SFN	14.5738	4.08265	1.37986	2.95874	0.00308895	0.0350164
ENST00000339450	ENSG00000099219	ERMP1	42778	-16.9803	0.861787	-19.7036	2.00667e-86	4.61635e-83
ENST00000339664	ENSG00000136870	ZNF189	1463.31	-12.1105	0.913088	-13.2632	3.78336e-40	1.24337e-37
ENST00000339732	ENSG00000131386	GALNT15	2919.98	-3.38182	0.704762	-4.79853	1.59837e-06	5.57594e-05
ENST00000339824	ENSG00000171435	KSR2	593.971	-2.0849	0.729235	-2.85902	0.00424947	0.0455246
ENST00000340080	ENSG00000164654	MIOS	64.0901	-3.02286	0.71638	-4.21963	2.44699e-05	0.000592558
ENST00000340096	ENSG00000046651	OFD1	130.95	-2.74732	0.635624	-4.32225	1.54449e-05	0.000398479
ENST00000340253	ENSG00000145868	FBXO38	250.051	-1.85505	0.429242	-4.3217	1.54832e-05	0.000398721
ENST00000340967	ENSG00000177076	ACER2	249.968	-2.64922	0.52276	-5.06775	4.02541e-07	1.6342e-05
ENST00000341105	ENSG00000179348	GATA2	197.607	-10.2555	2.64245	-3.88104	0.000104011	0.00209892
ENST00000341170	ENSG00000136925	TSTD2	206.468	-1.55034	0.430601	-3.6004	0.000317722	0.00536127
ENST00000341247	ENSG00000050405	LIMA1	621.573	-3.00191	0.429416	-6.99069	2.73547e-12	2.58614e-10
ENST00000341259	ENSG00000111252	SH2B3	7324.43	-1.19849	0.419513	-2.85686	0.00427852	0.045699
ENST00000341514	ENSG00000165240	ATP7A	176.514	-2.31564	0.733694	-3.15613	0.00159875	0.0206625
ENST00000341700	ENSG00000156049	GNA14	415.034	-2.33859	0.603123	-3.87746	0.000105551	0.00212071
ENST00000341776	ENSG00000008083	JARID2	413.693	-1.46386	0.477245	-3.06731	0.00215991	0.0263834
ENST00000341901	ENSG00000188322	SBK1	12.181	-6.06834	1.69541	-3.57927	0.000344554	0.00575773
ENST00000342462	ENSG00000188167	TMPPE	413.368	-10.2859	0.870734	-11.8129	3.34759e-32	9.62641e-30
ENST00000342505	ENSG00000162434	JAK1	6814.89	-2.93093	0.438759	-6.68004	2.38879e-11	1.9744e-09
ENST00000343002	ENSG00000089472	HEPH	6486.17	-14.6175	2.99568	-4.87953	1.06338e-06	3.96696e-05
ENST00000343070	ENSG00000168447	SCNN1B	369.707	-11.0113	2.34997	-4.68573	2.78966e-06	9.18992e-05
ENST00000343267	ENSG00000189058	APOD	280.694	-2.29389	0.681452	-3.36619	0.00076215	0.0112711
ENST00000343348	ENSG00000092421	SEMA6A	702	-3.81936	1.22779	-3.11077	0.00186601	0.023522
ENST00000344624	ENSG00000113360	DROSHA	6201.68	-14.631	2.14186	-6.83095	8.43513e-12	7.36899e-10
ENST00000345988	ENSG00000118898	PPL	2985.77	-13.6194	2.14407	-6.35213	2.12356e-10	1.55912e-08
ENST00000346798	ENSG00000142192	APP	28460.3	-1.63001	0.436218	-3.73668	0.000186465	0.00342599
ENST00000348343	ENSG00000102010	BMX	476.623	-2.05349	0.554184	-3.70544	0.000211028	0.00379274
ENST00000348831	ENSG00000197381	ADARB1	10614.6	-14.9683	1.54001	-9.71961	2.4873e-22	5.28187e-20
ENST00000349129	ENSG00000083097	DOP1A	142.349	-3.54657	0.48629	-7.29311	3.02871e-13	3.26604e-11
ENST00000349780	ENSG00000136861	CDK5RAP2	14231.5	-16.2786	0.945955	-17.2086	2.28765e-66	1.97353e-63
ENST00000349880	ENSG00000166833	NAV2	21030.2	-16.4368	2.19768	-7.47918	7.47901e-14	8.53163e-12
ENST00000350302	ENSG00000147364	FBXO25	153.776	-1.70996	0.475423	-3.59672	0.000322252	0.00541785
ENST00000350612	ENSG00000102710	SUPT20H	6164.93	-14.6195	1.58489	-9.22426	2.85513e-20	5.39854e-18
ENST00000350721	ENSG00000175054	ATR	409.95	-2.97862	0.475457	-6.26475	3.73434e-10	2.65696e-08
ENST00000350763	ENSG00000041982	TNC	256.453	-3.91342	0.812115	-4.8188	1.44428e-06	5.11773e-05
ENST00000351298	ENSG00000075651	PLD1	416.387	-3.1993	0.529014	-6.04767	1.46954e-09	9.39074e-08
ENST00000351677	ENSG00000179295	PTPN11	1982.62	-1.66042	0.431583	-3.84728	0.000119438	0.00233942
ENST00000352681	ENSG00000103269	RHBDL1	21.6433	-7.39348	1.70242	-4.34292	1.40603e-05	0.000368963
ENST00000352861	ENSG00000132432	SEC61G	644.123	1.18752	0.403798	2.94088	0.00327282	0.0366976
ENST00000354323	ENSG00000196196	HRCT1	86.2911	2.56562	0.567527	4.5207	6.16363e-06	0.0001814
ENST00000354772	ENSG00000092096	SLC22A17	1159.31	-11.7727	1.87401	-6.28206	3.34126e-10	2.42734e-08
ENST00000354919	ENSG00000152455	SUV39H2	56.0242	-2.21766	0.627929	-3.53171	0.000412883	0.00670473
ENST00000355123	ENSG00000198399	ITSN2	70.4381	-2.17183	0.640958	-3.38841	0.000702987	0.0105187
ENST00000355285	ENSG00000154856	APCDD1	37.1676	-7.77458	2.63087	-2.95513	0.00312537	0.0353024
ENST00000355431	ENSG00000032219	ARID4A	370.183	-1.20571	0.42121	-2.8625	0.00420319	0.0451491
ENST00000355754	ENSG00000162654	GBP4	1144.99	-1.99163	0.578842	-3.44071	0.000580184	0.0089179
ENST00000355898	ENSG00000168813	ZNF507	385.529	-1.55827	0.502485	-3.10112	0.00192791	0.0240823
ENST00000355969	ENSG00000197114	ZGPAT	259.779	1.18244	0.419389	2.81943	0.0048109	0.0499916
ENST00000356183	ENSG00000077235	GTF3C1	949.21	-1.27216	0.405462	-3.13756	0.0017036	0.0217931
ENST00000356239	ENSG00000127914	AKAP9	7049.98	-14.8177	2.73501	-5.41777	6.03459e-08	2.95374e-06
ENST00000356300	ENSG00000092051	JPH4	68.8533	-8.0608	2.7947	-2.88432	0.00392265	0.0427006
ENST00000356317	ENSG00000139629	GALNT6	1109.3	-12.597	2.21041	-5.69895	1.20545e-08	6.73637e-07
ENST00000356458	ENSG00000214595	EML6	22.8304	-4.529	1.09978	-4.11809	3.82028e-05	0.000887733
ENST00000356575	ENSG00000162591	MEGF6	1813.58	-12.4558	2.59429	-4.80125	1.57678e-06	5.52392e-05
ENST00000356577	ENSG00000159140	SON	615.569	-4.45559	0.616131	-7.23156	4.77478e-13	4.88195e-11
ENST00000356584	ENSG00000197128	ZNF772	1392.51	-12.038	1.44116	-8.35295	6.65813e-17	9.47444e-15
ENST00000356591	ENSG00000178878	APOLD1	928.215	-2.33736	0.565042	-4.13662	3.52463e-05	0.000828798
ENST00000356805	ENSG00000115306	SPTBN1	11708.7	-2.63245	0.393658	-6.68714	2.27568e-11	1.89929e-09
ENST00000356956	ENSG00000197081	IGF2R	2212.02	-2.04196	0.432601	-4.7202	2.35609e-06	7.85535e-05
ENST00000357002	ENSG00000213096	ZNF254	5334.77	-13.9759	1.47292	-9.48853	2.3431e-21	4.55519e-19
ENST00000357081	ENSG00000135049	AGTPBP1	331.719	-1.36128	0.396877	-3.42999	0.000603608	0.00922658
ENST00000357277	ENSG00000169891	REPS2	1013.52	-11.5787	1.87084	-6.18906	6.05256e-10	4.01651e-08
ENST00000357681	ENSG00000058668	ATP2B4	3697.63	-2.69911	0.407538	-6.62296	3.52068e-11	2.82534e-09
ENST00000357743	ENSG00000147533	GOLGA7	764.791	-11.1738	1.10812	-10.0836	6.52913e-24	1.55382e-21
ENST00000357749	ENSG00000188419	CHM	429.658	-1.47693	0.423745	-3.48543	0.000491342	0.00776861
ENST00000357785	ENSG00000118257	NRP2	4437.62	-1.3511	0.42308	-3.19347	0.00140572	0.0186032
ENST00000357992	ENSG00000158711	ELK4	1576.9	-1.17104	0.408321	-2.86794	0.00413152	0.0445179
ENST00000358102	ENSG00000151623	NR3C2	9077.39	-14.7427	1.49276	-9.87615	5.28252e-23	1.21524e-20
ENST00000358160	ENSG00000178075	GRAMD1C	350.506	-1.4439	0.470962	-3.06585	0.00217049	0.0264892
ENST00000358273	ENSG00000196712	NF1	332.622	-1.59783	0.508969	-3.13934	0.0016933	0.0217015
ENST00000358385	ENSG00000198513	ATL1	30.8194	-3.36768	1.16736	-2.88487	0.00391576	0.0426592
ENST00000358431	ENSG00000197077	KIAA1671	966.509	-2.72582	0.423784	-6.4321	1.25856e-10	9.54502e-09
ENST00000358528	ENSG00000009307	CSDE1	44525.1	-17.9241	0.948975	-18.8879	1.43481e-79	1.80043e-76
ENST00000358531	ENSG00000213390	ARHGAP19	303.312	-1.3422	0.453782	-2.95781	0.0030983	0.0350253
ENST00000358780	ENSG00000077458	FAM76B	95.1477	-1.63729	0.527406	-3.10441	0.00190658	0.0239459
ENST00000359154	ENSG00000198373	WWP2	664.057	-1.59936	0.402139	-3.97714	6.97493e-05	0.00148572
ENST00000359165	ENSG00000245205	EEF1A1P4	10.9967	-5.92134	1.72046	-3.44172	0.000578021	0.00889457
ENST00000359263	ENSG00000138119	MYOF	8183.31	-1.63623	0.403059	-4.05953	4.91712e-05	0.001109
ENST00000359446	ENSG00000168675	LDLRAD4	4463.69	-14.1265	1.00074	-14.1161	3.02299e-45	1.12774e-42
ENST00000359634	ENSG00000196950	SLC39A10	616.195	-1.6211	0.422115	-3.84042	0.000122826	0.00240138
ENST00000359744	ENSG00000144362	PHOSPHO2	231.485	-9.87334	1.15134	-8.57554	9.86252e-18	1.54696e-15
ENST00000359843	ENSG00000111206	FOXM1	1093.82	-1.52865	0.417364	-3.66264	0.000249633	0.00438382
ENST00000359858	ENSG00000197056	ZMYM1	194.924	-2.47917	0.646533	-3.83456	0.00012579	0.00245583
ENST00000360256	ENSG00000185010	F8	116.867	-3.93849	0.818422	-4.81229	1.4921e-06	5.26737e-05
ENST00000360280	ENSG00000197969	VPS13A	271.457	-1.35098	0.435711	-3.10063	0.0019311	0.0241004
ENST00000360359	ENSG00000064999	ANKS1A	352.528	-1.26889	0.437517	-2.90022	0.00372905	0.0412436
ENST00000360534	ENSG00000197635	DPP4	257.621	-2.87097	0.562132	-5.10728	3.26835e-07	1.35475e-05
ENST00000360535	ENSG00000105270	CLIP3	418.504	-1.43773	0.497775	-2.88831	0.00387313	0.042295
ENST00000360632	ENSG00000018408	WWTR1	5651.29	-1.17151	0.41304	-2.83631	0.00456381	0.0480211
ENST00000360835	ENSG00000159307	SCUBE1	950.282	-2.61408	0.599946	-4.35719	1.31744e-05	0.000349705
ENST00000360851	ENSG00000143344	RGL1	926.519	-1.26621	0.406654	-3.11372	0.00184745	0.023352
ENST00000360905	ENSG00000082805	ERC1	1205.61	-1.54474	0.406697	-3.79824	0.000145725	0.00279285
ENST00000361069	ENSG00000050555	LAMC3	42.557	-7.39406	2.45799	-3.00817	0.00262826	0.0306143
ENST00000361099	ENSG00000115415	STAT1	1074.14	-1.65585	0.438839	-3.77326	0.00016113	0.00303422
ENST00000361189	ENSG00000198961	PJA2	1358.64	-1.68175	0.412463	-4.07733	4.55567e-05	0.00103937
ENST00000361228	ENSG00000198774	RASSF9	196.903	-2.15079	0.566298	-3.79797	0.000145885	0.00279285
ENST00000361297	ENSG00000086015	MAST2	730.787	-1.1421	0.395371	-2.88868	0.00386862	0.0422791
ENST00000361346	ENSG00000198815	FOXJ3	786.526	-2.32326	0.672328	-3.45555	0.000549178	0.00855843
ENST00000361362	ENSG00000198939	ZFP2	181.414	-9.536	2.9458	-3.23715	0.00120731	0.0164021
ENST00000361384	ENSG00000198924	DCLRE1A	1326.68	-12.3862	0.958392	-12.9239	3.29967e-38	1.01212e-35
ENST00000361445	ENSG00000198793	MTOR	1047.27	-1.78372	0.413261	-4.3162	1.58738e-05	0.000406506
ENST00000361490	ENSG00000107521	HPS1	960.914	-11.5027	1.38096	-8.3295	8.11868e-17	1.14349e-14
ENST00000361507	ENSG00000033327	GAB2	737.333	-1.37807	0.395907	-3.48079	0.000499943	0.00788653
ENST00000361580	ENSG00000075945	KIFAP3	488.675	-1.3346	0.43787	-3.04794	0.00230419	0.0276562
ENST00000361624	ENSG00000198804	MT-CO1	203932	1.37756	0.472089	2.918	0.00352288	0.0392148
ENST00000361681	ENSG00000198695	MT-ND6	877.531	2.1203	0.506025	4.19011	2.78818e-05	0.000668148
ENST00000361739	ENSG00000198712	MT-CO2	95992.8	1.60622	0.501753	3.20122	0.00136847	0.0182326
ENST00000361756	ENSG00000137522	RNF121	247.134	1.26359	0.443014	2.85226	0.00434101	0.046209
ENST00000366766	ENSG00000143776	CDC42BPA	781.54	-2.63786	0.443768	-5.94422	2.7777e-09	1.7052e-07
ENST00000366898	ENSG00000185345	PRKN	318.261	-10.3465	2.4209	-4.27384	1.92139e-05	0.000481031
ENST00000366960	ENSG00000136643	RPS6KC1	11978.4	-15.1439	0.85051	-17.8056	6.39089e-71	6.30096e-68
ENST00000367021	ENSG00000117595	IRF6	3656.75	-13.432	0.916579	-14.6545	1.26151e-48	5.12136e-46
ENST00000367091	ENSG00000162894	FCMR	40.439	-3.82645	1.11352	-3.43636	0.000589589	0.0090323
ENST00000367162	ENSG00000133059	DSTYK	297.28	-1.81104	0.453782	-3.99099	6.57989e-05	0.00141504
ENST00000367178	ENSG00000213079	SCAF8	501.237	-1.26558	0.438103	-2.88877	0.00386747	0.0422791
ENST00000367210	ENSG00000058673	ZC3H11A	466.855	-1.38278	0.422441	-3.27332	0.00106293	0.0147158
ENST00000367244	ENSG00000146469	VIP	42.6717	-6.99885	1.43878	-4.86442	1.1479e-06	4.2252e-05
ENST00000367362	ENSG00000116833	NR5A2	433.167	-4.7909	0.533217	-8.9849	2.5896e-19	4.5826e-17
ENST00000367467	ENSG00000111961	SASH1	4188.6	-1.74557	0.434465	-4.01775	5.87555e-05	0.00128935
ENST00000367519	ENSG00000112425	EPM2A	206.652	-10.2478	2.66247	-3.84898	0.000118613	0.0023289
ENST00000367545	ENSG00000152818	UTRN	4345.98	-2.82763	0.445079	-6.35308	2.1104e-10	1.55774e-08
ENST00000367635	ENSG00000116191	RALGPS2	150.052	-1.96146	0.501898	-3.90809	9.30288e-05	0.00191368
ENST00000367649	ENSG00000075391	RASAL2	894.844	-1.69691	0.395983	-4.2853	1.82492e-05	0.00046219
ENST00000367854	ENSG00000198771	RCSD1	53.6727	-3.0679	0.94235	-3.25558	0.00113159	0.0154954
ENST00000368068	ENSG00000112282	MED23	427.751	-1.3298	0.428013	-3.10691	0.00189052	0.0237657
ENST00000368107	ENSG00000158716	DUSP23	73.5128	1.85215	0.559693	3.30923	0.000935543	0.0132308
ENST00000368364	ENSG00000135547	HEY2	352.579	-10.4538	1.4619	-7.15087	8.62319e-13	8.75191e-11
ENST00000368474	ENSG00000160710	ADAR	1408.39	-1.9894	0.530999	-3.74652	0.000179305	0.00332208
ENST00000368654	ENSG00000148773	MKI67	1161.1	-1.4849	0.5207	-2.85175	0.00434799	0.046209
ENST00000368655	ENSG00000143614	GATAD2B	509.729	-1.68171	0.528614	-3.18136	0.00146583	0.0192328
ENST00000368680	ENSG00000169418	NPR1	1515.36	-3.20886	0.710462	-4.51658	6.28458e-06	0.000183784
ENST00000368708	ENSG00000196754	S100A2	97.4358	4.95505	0.71522	6.92801	4.26787e-12	3.95365e-10
ENST00000368824	ENSG00000182134	TDRKH	635.474	-11.8665	3.00322	-3.95126	7.77419e-05	0.00162586
ENST00000368911	ENSG00000155111	CDK19	3407.61	-13.3292	1.47428	-9.04113	1.55061e-19	2.77962e-17
ENST00000369068	ENSG00000163125	RPRD2	294.495	-2.3172	0.451399	-5.13337	2.84595e-07	1.194e-05
ENST00000369096	ENSG00000057657	PRDM1	211.31	-3.94303	0.636045	-6.19929	5.67173e-10	3.80033e-08
ENST00000369415	ENSG00000025039	RRAGD	50.5021	-3.81616	0.998352	-3.82246	0.000132127	0.00257229
ENST00000369449	ENSG00000155962	CLIC2	296.1	-2.50432	0.544976	-4.59528	4.32159e-06	0.000133447
ENST00000369755	ENSG00000065613	SLK	134.948	-1.74879	0.576264	-3.0347	0.00240774	0.0285761
ENST00000369800	ENSG00000214357	NEURL1B	3116.64	-1.72628	0.55694	-3.09959	0.0019379	0.024159
ENST00000369947	ENSG00000135312	HTR1B	68.9868	-2.8199	0.771088	-3.65705	0.000255138	0.00444655
ENST00000369977	ENSG00000196586	MYO6	1702.61	-12.7255	1.53549	-8.28757	1.15589e-16	1.59548e-14
ENST00000370056	ENSG00000134215	VAV3	413.961	-1.65423	0.548102	-3.0181	0.00254366	0.0299319
ENST00000370097	ENSG00000125531	FNDC11	27.6408	-6.80587	1.63814	-4.15463	3.25816e-05	0.000772721
ENST00000370401	ENSG00000013619	MAMLD1	2223.29	-13.1472	1.53594	-8.55969	1.13169e-17	1.75514e-15
ENST00000370454	ENSG00000171488	LRRC8C	2521.25	-1.22379	0.407618	-3.0023	0.00267946	0.031158
ENST00000370501	ENSG00000101188	NTSR1	357.923	-10.5169	1.97158	-5.33426	9.59362e-08	4.39936e-06
ENST00000370685	ENSG00000142875	PRKACB	1302.13	-1.96247	0.4842	-4.05301	5.05618e-05	0.00113296
ENST00000370794	ENSG00000077254	USP33	573.146	-1.47633	0.410999	-3.59206	0.000328079	0.0055024
ENST00000371068	ENSG00000096093	EFHC1	678.546	-11.0013	0.881351	-12.4824	9.31731e-36	2.7958e-33
ENST00000371121	ENSG00000102038	SMARCA1	568.946	-1.6756	0.462787	-3.62066	0.000293851	0.0049942
ENST00000371244	ENSG00000162409	PRKAA2	51.2093	-2.53141	0.738814	-3.42632	0.000611826	0.00934185
ENST00000371250	ENSG00000162407	PLPP3	1124.63	-1.65836	0.400625	-4.13944	3.48149e-05	0.000820051
ENST00000371374	ENSG00000172348	RCAN2	305.1	-4.84894	0.67894	-7.14192	9.20333e-13	9.27253e-11
ENST00000371628	ENSG00000175556	LONRF3	216.483	-9.71619	2.35788	-4.12073	3.77682e-05	0.000882088
ENST00000371728	ENSG00000138182	KIF20B	1853.08	-12.4503	1.43054	-8.7032	3.22647e-18	5.2394e-16
ENST00000371733	ENSG00000085832	EPS15	861.941	-2.04618	0.502997	-4.06797	4.74244e-05	0.00107842
ENST00000371901	ENSG00000186377	CYP4X1	50.7498	-7.64641	1.94004	-3.94137	8.10176e-05	0.00169181
ENST00000371917	ENSG00000124198	ARFGEF2	1194.31	-3.99822	0.614821	-6.50307	7.86954e-11	6.17178e-09
ENST00000371941	ENSG00000124126	PREX1	2908.01	-1.43415	0.416611	-3.44241	0.000576546	0.00888176
ENST00000371959	ENSG00000126016	AMOT	88.8123	-3.42511	0.573344	-5.97391	2.31632e-09	1.45992e-07
ENST00000371998	ENSG00000124151	NCOA3	569.9	-1.89213	0.409289	-4.62297	3.7829e-06	0.000118941
ENST00000372007	ENSG00000077264	PAK3	83.2303	-7.96857	1.24926	-6.37863	1.78678e-10	1.32596e-08
ENST00000372068	ENSG00000157600	TMEM164	4969.55	-14.3082	1.56877	-9.12067	7.46643e-20	1.35604e-17
ENST00000372088	ENSG00000107771	CCSER2	701.261	-1.81787	0.457166	-3.97639	6.9968e-05	0.00148809
ENST00000372383	ENSG00000157514	TSC22D3	1061.37	-11.6453	1.8653	-6.24313	4.28907e-10	2.9601e-08
ENST00000372808	ENSG00000124713	GNMT	15.3352	-5.90974	1.57416	-3.75423	0.000173874	0.00323884
ENST00000372980	ENSG00000149596	JPH2	46.2185	2.34815	0.777875	3.01868	0.0025388	0.0299258
ENST00000373034	ENSG00000165194	PCDH19	663.227	-10.9684	0.931243	-11.7782	5.0558e-32	1.42419e-29
ENST00000373045	ENSG00000185090	MANEAL	92.4142	-8.51574	1.77611	-4.79459	1.63008e-06	5.66751e-05
ENST00000373079	ENSG00000186310	NAP1L3	701.444	-11.0465	2.78679	-3.96387	7.37433e-05	0.00155164
ENST00000373233	ENSG00000124177	CHD6	481.287	-1.19983	0.41113	-2.91836	0.00351874	0.0392003
ENST00000373243	ENSG00000020129	NCDN	237.362	-1.47926	0.456872	-3.23779	0.00120459	0.0163812
ENST00000373304	ENSG00000173198	CYSLTR1	107.279	-9.47332	2.53818	-3.73233	0.00018972	0.00346849
ENST00000373367	ENSG00000102383	ZDHHC15	53.665	-8.22342	2.4331	-3.37981	0.000725367	0.0107802
ENST00000373381	ENSG00000121904	CSMD2	193.843	-10.3408	3.00331	-3.44312	0.000575052	0.00887857
ENST00000373394	ENSG00000131269	ABCB7	625.989	-11.2489	2.9959	-3.75477	0.000173504	0.00323632
ENST00000373447	ENSG00000101407	TTI1	421.057	-1.86395	0.658743	-2.82956	0.0046612	0.0488523
ENST00000373563	ENSG00000204120	GIGYF2	283.798	-1.52285	0.504617	-3.01782	0.00254596	0.0299335
ENST00000373580	ENSG00000185585	OLFML2A	716.531	-11.9663	1.63128	-7.33552	2.20862e-13	2.40044e-11
ENST00000373872	ENSG00000118707	TGIF2	466.622	-3.795	0.431718	-8.79045	1.48956e-18	2.47716e-16
ENST00000373887	ENSG00000056558	TRAF1	229.182	-10.5825	3.00329	-3.52363	0.000425675	0.006864
ENST00000373930	ENSG00000106780	MEGF9	690.151	-1.24431	0.428882	-2.90128	0.00371642	0.0411369
ENST00000374080	ENSG00000184634	MED12	12450.2	-15.1976	2.05573	-7.39279	1.43777e-13	1.60045e-11
ENST00000374193	ENSG00000148225	WDR31	619.735	-11.7569	2.14926	-5.47019	4.49556e-08	2.30677e-06
ENST00000374266	ENSG00000142684	ZNF593	238.478	1.4925	0.4205	3.54935	0.000386187	0.00634595
ENST00000374552	ENSG00000158813	EDA	802.977	-11.6833	1.99057	-5.86933	4.37552e-09	2.58099e-07
ENST00000374566	ENSG00000095203	EPB41L4B	20.9658	-4.74253	1.0261	-4.62188	3.80284e-06	0.000119297
ENST00000374580	ENSG00000204217	BMPR2	2189.33	-1.41447	0.402726	-3.51224	0.000444351	0.00711529
ENST00000374619	ENSG00000179546	HTR1D	172.665	-1.65913	0.586609	-2.82835	0.00467891	0.0489265
ENST00000374690	ENSG00000169083	AR	385.165	-2.66859	0.478464	-5.57741	2.44131e-08	1.3061e-06
ENST00000374695	ENSG00000142798	HSPG2	73015.6	-2.43626	0.446844	-5.45214	4.97677e-08	2.51628e-06
ENST00000374810	ENSG00000078804	TP53INP2	839.442	-1.99238	0.492171	-4.04814	5.1626e-05	0.00115493
ENST00000374879	ENSG00000241697	TMEFF1	144.984	-1.65327	0.550535	-3.00303	0.00267309	0.0311102
ENST00000374884	ENSG00000186767	SPIN4	485.293	-2.28422	0.49456	-4.61869	3.86165e-06	0.000120867
ENST00000374897	ENSG00000204267	TAP2	32591.8	-16.9569	2.32887	-7.28117	3.30933e-13	3.48693e-11
ENST00000375050	ENSG00000204304	PBX2	106.022	-2.83267	0.815981	-3.47149	0.000517587	0.0081277
ENST00000375254	ENSG00000127481	UBR4	1474.74	-1.85582	0.4674	-3.97053	7.17127e-05	0.00152051
ENST00000375377	ENSG00000165757	JCAD	2176.16	-1.7531	0.425511	-4.12	3.78876e-05	0.000883383
ENST00000375527	ENSG00000204366	ZBTB12	454.522	-11.4586	2.74381	-4.17616	2.96477e-05	0.000708005
ENST00000375645	ENSG00000068650	ATP11A	735.934	-2.17136	0.429239	-5.05861	4.22316e-07	1.69948e-05
ENST00000375735	ENSG00000187240	DYNC2H1	162.237	-1.77143	0.531958	-3.33001	0.000868415	0.0125218
ENST00000375759	ENSG00000065526	SPEN	721.195	-2.35019	0.42264	-5.56073	2.68645e-08	1.42619e-06
ENST00000375847	ENSG00000116138	DNAJC16	348.436	-3.05403	0.636475	-4.79836	1.5997e-06	5.57594e-05
ENST00000375963	ENSG00000083223	TUT7	423.338	-1.61566	0.419031	-3.8557	0.0001154	0.00228532
ENST00000376020	ENSG00000158352	SHROOM4	823.736	-1.36262	0.430218	-3.16728	0.00153874	0.0199805
ENST00000376140	ENSG00000136754	ABI1	7710.83	-15.3653	3.00318	-5.11635	3.11504e-07	1.299e-05
ENST00000376180	ENSG00000198542	ITGBL1	43.1416	2.56368	0.672111	3.81437	0.00013653	0.00263202
ENST00000376228	ENSG00000204525	HLA-C	41060.7	-18.7458	3.00317	-6.242	4.32022e-10	2.96677e-08
ENST00000376621	ENSG00000204590	GNL1	42229.2	-17.3994	2.33999	-7.43567	1.04038e-13	1.16751e-11
ENST00000376772	ENSG00000204619	PPP1R11	8919.6	-15.8736	3.00318	-5.28561	1.25289e-07	5.59664e-06
ENST00000377050	ENSG00000213886	UBD	128.487	-9.39082	3.00338	-3.12675	0.0017675	0.0224649
ENST00000377067	ENSG00000179399	GPC5	26.4365	-3.72517	1.23237	-3.02278	0.00250466	0.0296754
ENST00000377071	ENSG00000089094	KDM2B	306.808	-1.46677	0.409936	-3.57803	0.00034619	0.00577806
ENST00000377245	ENSG00000119139	TJP2	2814.21	-1.25453	0.410634	-3.0551	0.00224984	0.0271694
ENST00000377264	ENSG00000110046	ATG2A	479.829	-1.25285	0.423157	-2.96072	0.00306924	0.0348681
ENST00000377474	ENSG00000178695	KCTD12	11072.7	-1.26374	0.44304	-2.85242	0.00433876	0.046209
ENST00000377495	ENSG00000148483	TMEM236	24.2816	-2.62608	0.930314	-2.82279	0.00476072	0.0495193
ENST00000377532	ENSG00000049246	PER3	915.406	-12.8008	2.42132	-5.2867	1.24539e-07	5.58123e-06
ENST00000377561	ENSG00000154529	CNTNAP3B	3207.27	-14.3894	2.97327	-4.83959	1.30105e-06	4.72591e-05
ENST00000377602	ENSG00000148488	ST8SIA6	55.2475	-7.37507	1.16802	-6.31417	2.71623e-10	1.98371e-08
ENST00000377670	ENSG00000124440	HIF3A	567.029	-2.33971	0.541495	-4.32084	1.55434e-05	0.000399527
ENST00000377801	ENSG00000182836	PLCXD3	442.328	-2.92056	0.764561	-3.81991	0.000133499	0.00259168
ENST00000377918	ENSG00000118946	PCDH17	234.742	-3.32797	0.71081	-4.68194	2.84174e-06	9.317e-05
ENST00000377950	ENSG00000159871	LYPD5	76.5191	-8.73634	1.90642	-4.58258	4.59274e-06	0.000140875
ENST00000378016	ENSG00000197558	SSPOP	46.7512	-7.53351	1.35614	-5.55511	2.77439e-08	1.46164e-06
ENST00000378076	ENSG00000077943	ITGA8	150.323	-2.63957	0.709015	-3.72287	0.00019697	0.00357735
ENST00000378163	ENSG00000147044	CASK	579.412	-12.7089	3.00322	-4.23174	2.31888e-05	0.000564505
ENST00000378226	ENSG00000132640	BTBD3	1909.41	-13.4185	3.00319	-4.4681	7.8919e-06	0.000226
ENST00000378444	ENSG00000183337	BCOR	101.566	-4.3615	0.717652	-6.07745	1.22105e-09	7.83916e-08
ENST00000378466	ENSG00000157881	PANK4	13623.2	-15.3269	2.53674	-6.04196	1.52256e-09	9.68472e-08
ENST00000378473	ENSG00000101333	PLCB4	615.767	-11.8898	2.78216	-4.27357	1.92371e-05	0.000481031
ENST00000378482	ENSG00000156298	TSPAN7	601.568	-2.94533	0.657546	-4.47928	7.48946e-06	0.000215818
ENST00000378617	ENSG00000165282	PIGO	375.851	-11.1085	3.00325	-3.69883	0.000216599	0.00387268
ENST00000378693	ENSG00000198944	SOWAHA	48.4775	-8.05318	2.69061	-2.99307	0.0027619	0.0318218
ENST00000378718	ENSG00000179611	DGKZP1	42.4163	-7.421	1.27234	-5.83257	5.45786e-09	3.13895e-07
ENST00000378850	ENSG00000205129	CFAP96	18.6696	-7.17991	1.74894	-4.1053	4.03788e-05	0.000928915
ENST00000379068	ENSG00000101868	POLA1	28101	-16.3741	0.845401	-19.3684	1.42579e-83	2.46003e-80
ENST00000379287	ENSG00000145990	GFOD1	716.95	-1.267	0.446206	-2.83948	0.00451865	0.0476842
ENST00000379388	ENSG00000095951	HIVEP1	359.427	-1.33558	0.43092	-3.09937	0.0019393	0.024159
ENST00000379400	ENSG00000101265	RASSF2	824.194	-3.47732	0.708951	-4.90488	9.34858e-07	3.54501e-05
ENST00000379426	ENSG00000205269	TMEM170B	40.5599	-4.42113	0.825118	-5.35818	8.40642e-08	3.90686e-06
ENST00000379446	ENSG00000111859	NEDD9	2416.55	-2.58526	0.540713	-4.78121	1.74244e-06	6.00193e-05
ENST00000379453	ENSG00000171873	ADRA1D	180.155	-4.10106	0.835175	-4.91042	9.08812e-07	3.47539e-05
ENST00000379561	ENSG00000150907	FOXO1	1853.59	-1.57822	0.451955	-3.49198	0.000479452	0.00760676
ENST00000379613	ENSG00000137203	TFAP2A	104.595	-9.66995	2.19747	-4.40049	1.08008e-05	0.000292895
ENST00000379727	ENSG00000140465	CYP1A1	535.95	-4.79018	1.2292	-3.89698	9.7398e-05	0.00199464
ENST00000379775	ENSG00000170525	PFKFB3	437.622	-1.44321	0.506973	-2.84672	0.00441719	0.0467362
ENST00000379958	ENSG00000205413	SAMD9	702.819	-2.53586	0.671255	-3.77779	0.000158229	0.00298773
ENST00000380036	ENSG00000120156	TEK	1387.99	-1.25284	0.427109	-2.93331	0.00335367	0.0374824
ENST00000380152	ENSG00000139618	BRCA2	6191.82	-15.1512	3.00318	-5.04504	4.53423e-07	1.81875e-05
ENST00000380338	ENSG00000171843	MLLT3	78.4043	-1.71641	0.528747	-3.24619	0.00116959	0.015984
ENST00000380486	ENSG00000157617	C2CD2	725.247	-1.85442	0.417828	-4.43823	9.07016e-06	0.000253432
ENST00000380625	ENSG00000187268	FAM9C	618.609	-11.1901	2.47612	-4.51923	6.20647e-06	0.000182197
ENST00000380913	ENSG00000146950	SHROOM2	695.584	-1.81182	0.397951	-4.55287	5.29178e-06	0.000159481
ENST00000380953	ENSG00000147862	NFIB	151.034	-2.13673	0.681657	-3.13461	0.00172084	0.0219729
ENST00000380958	ENSG00000152520	PAN3	157.565	-1.45037	0.50771	-2.85669	0.00428087	0.045699
ENST00000381134	ENSG00000157399	ARSL	197.034	-11.1523	3.00331	-3.71332	0.000204554	0.00369563
ENST00000381254	ENSG00000178295	GEN1	284.565	-3.65533	0.675721	-5.40952	6.31928e-08	3.06053e-06
ENST00000381501	ENSG00000135605	TEC	34.3812	-3.96682	0.847938	-4.67819	2.89414e-06	9.42165e-05
ENST00000382044	ENSG00000067369	TP53BP1	427.915	-1.32676	0.427493	-3.10357	0.00191198	0.0239887
ENST00000382100	ENSG00000147852	VLDLR	25.4036	-3.18021	1.12803	-2.81927	0.00481337	0.0499916
ENST00000382108	ENSG00000182957	SPATA13	157.222	-1.96404	0.552646	-3.55389	0.000379578	0.00625963
ENST00000382285	ENSG00000125841	NRSN2	866.332	-12.2402	1.80136	-6.795	1.0831e-11	9.34487e-10
ENST00000382483	ENSG00000183638	RP1L1	71.1051	-8.63015	1.90744	-4.52447	6.05458e-06	0.000178954
ENST00000383102	ENSG00000230708	HLA-DPB1	352.937	-10.5493	3.0003	-3.51607	0.000437978	0.00702955
ENST00000383472	ENSG00000088756	ARHGAP28	54.0455	-5.77576	1.79421	-3.21911	0.00128589	0.0173232
ENST00000383560	ENSG00000206478	IER3	65490.9	-18.0857	3.00023	-6.02812	1.65881e-09	1.0503e-07
ENST00000383564	ENSG00000183311	TUBB	6243.18	-6.68322	1.71151	-3.90487	9.42745e-05	0.00193642
ENST00000383566	ENSG00000206481	MDC1	1538.36	-13.3301	3.00319	-4.43864	9.05297e-06	0.000253432
ENST00000383701	ENSG00000163378	EOGT	668.046	-1.58772	0.441132	-3.5992	0.0003192	0.00537307
ENST00000383791	ENSG00000131370	SH3BP5	5136.92	-1.54886	0.479105	-3.23282	0.00122573	0.0166196
ENST00000388887	ENSG00000136011	STAB2	17.318	-5.62983	1.87534	-3.00204	0.0026818	0.031159
ENST00000389022	ENSG00000205309	NT5M	141.503	-9.22859	2.94272	-3.13607	0.00171226	0.0218836
ENST00000389175	ENSG00000144395	CCDC150	58.7224	-8.35368	1.89313	-4.41263	1.02122e-05	0.000280237
ENST00000389561	ENSG00000183495	EP400	919.856	-1.19765	0.419236	-2.85675	0.00428003	0.045699
ENST00000389622	ENSG00000080200	CRYBG3	485.805	-1.39929	0.418211	-3.34588	0.00082022	0.0119174
ENST00000389759	ENSG00000144283	PKP4	770.488	-1.84235	0.418971	-4.39731	1.09599e-05	0.000296626
ENST00000389793	ENSG00000143669	LYST	112.049	-2.17992	0.665726	-3.2745	0.00105848	0.0146688
ENST00000389857	ENSG00000015133	CCDC88C	616.39	-2.41983	0.539898	-4.48202	7.39405e-06	0.000213515
ENST00000390344	ENSG00000211697	TRGV5	186.168	-10.5026	2.27636	-4.61375	3.95474e-06	0.000123501
ENST00000391998	ENSG00000250731	TPM3P6	10.9788	-6.40983	1.80698	-3.54727	0.000389252	0.00638105
ENST00000392328	ENSG00000151690	MFSD6	2577.93	-13.415	2.63558	-5.08997	3.58125e-07	1.47119e-05
ENST00000392370	ENSG00000064989	CALCRL	1051.41	-1.8706	0.488436	-3.82978	0.000128256	0.00250044
ENST00000392386	ENSG00000006016	CRLF1	29.1642	-7.33914	1.51208	-4.85367	1.21197e-06	4.41394e-05
ENST00000392521	ENSG00000122966	CIT	364.148	-1.57388	0.467145	-3.36914	0.000754024	0.0111792
ENST00000392531	ENSG00000213145	CRIP1	48.5117	2.56734	0.851513	3.01503	0.00256955	0.0301019
ENST00000392583	ENSG00000111335	OAS2	1373.19	-2.14702	0.607522	-3.53407	0.000409218	0.00665304
ENST00000392668	ENSG00000134954	ETS1	514.586	-5.09754	1.39619	-3.65104	0.000261177	0.00451192
ENST00000392783	ENSG00000123636	BAZ2B	252.441	-1.47443	0.474374	-3.10817	0.0018825	0.0236945
ENST00000393256	ENSG00000153094	BCL2L11	156.998	-2.36191	0.712639	-3.31431	0.000918691	0.0130864
ENST00000393274	ENSG00000175984	DENND2C	952.461	-11.4908	0.886828	-12.9572	2.13942e-38	6.71146e-36
ENST00000393359	ENSG00000135966	TGFBRAP1	769.824	-2.95338	0.55455	-5.32574	1.00545e-07	4.58029e-06
ENST00000393437	ENSG00000170500	LONRF2	301.798	-10.1949	2.45659	-4.15002	3.3245e-05	0.000787102
ENST00000393487	ENSG00000071073	MGAT4A	1046.51	-1.94034	0.482244	-4.02357	5.73234e-05	0.00126194
ENST00000393630	ENSG00000061987	MON2	39.6939	-2.21133	0.706368	-3.13057	0.00174467	0.0222361
ENST00000393960	ENSG00000173599	PC	171.484	-10.384	2.23712	-4.64167	3.45603e-06	0.00011017
ENST00000394052	ENSG00000213424	KRT222	42.5904	-7.88885	2.39539	-3.29334	0.00099004	0.0138877
ENST00000394053	ENSG00000065911	MTHFD2	394.481	1.43546	0.435077	3.29933	0.000969161	0.0136503
ENST00000394152	ENSG00000197037	ZSCAN25	141.944	-1.37849	0.478937	-2.87822	0.00399922	0.0432612
ENST00000394223	ENSG00000109390	NDUFC1	879.085	-12.2614	1.59523	-7.68628	1.51475e-14	1.77188e-12
ENST00000394319	ENSG00000106852	LHX6	1744.51	-2.17439	0.542687	-4.00671	6.15692e-05	0.00134044
ENST00000394329	ENSG00000196159	FAT4	391.897	-2.99449	0.504679	-5.93346	2.96619e-09	1.80363e-07
ENST00000394479	ENSG00000162924	REL	331.714	-2.50429	0.450661	-5.55694	2.74547e-08	1.45194e-06
ENST00000394518	ENSG00000170776	AKAP13	616.048	-1.75368	0.470256	-3.72921	0.000192084	0.00350242
ENST00000394636	ENSG00000176842	IRX5	64.6761	-3.09294	0.927185	-3.33584	0.000850411	0.0122913
ENST00000394662	ENSG00000225492	GBP1P1	13.4188	-5.30485	1.6812	-3.1554	0.00160278	0.0206952
ENST00000394834	ENSG00000203943	SAMD13	473.244	-10.9194	1.89784	-5.75358	8.73754e-09	4.9428e-07
ENST00000395124	ENSG00000134802	SLC43A3	1205.36	-1.20315	0.387777	-3.10269	0.00191769	0.0239981
ENST00000395146	ENSG00000172493	AFF1	1678.34	-1.41332	0.399788	-3.53516	0.00040753	0.00663342
ENST00000395348	ENSG00000165449	SLC16A9	373.753	-11.0272	1.70878	-6.45325	1.09473e-10	8.44165e-09
ENST00000395456	ENSG00000213658	LAT	6.33411	6.22231	2.11089	2.94772	0.00320124	0.0360708
ENST00000395715	ENSG00000104447	TRPS1	1627.96	-13.393	2.58522	-5.18062	2.2115e-07	9.47992e-06
ENST00000395826	ENSG00000115138	POMC	57.0252	-8.79431	2.86571	-3.06881	0.00214915	0.0262752
ENST00000395867	ENSG00000198105	ZNF248	2651.19	-12.968	0.877742	-14.7743	2.14598e-49	8.97606e-47
ENST00000396037	ENSG00000111728	ST8SIA1	38.6675	-7.74878	2.43844	-3.17777	0.00148415	0.0194177
ENST00000396137	ENSG00000152409	JMY	317.878	-1.3857	0.450038	-3.07907	0.00207645	0.025654
ENST00000396172	ENSG00000198563	DDX39B	7027.53	-16.3094	3.00318	-5.4307	5.61341e-08	2.79136e-06
ENST00000396271	ENSG00000107897	ACBD5	17610.3	-15.6999	0.855543	-18.3508	3.25479e-75	3.45583e-72
ENST00000396368	ENSG00000166783	MARF1	581.573	-1.70041	0.430107	-3.95345	7.70319e-05	0.00161591
ENST00000396410	ENSG00000179889	PDXDC1	8176.97	-15.074	2.19768	-6.85904	6.93256e-12	6.25426e-10
ENST00000396551	ENSG00000204599	TRIM39	3169.36	-13.5916	2.65877	-5.11197	3.18811e-07	1.32547e-05
ENST00000397088	ENSG00000164850	GPER1	42.3283	-3.39131	1.14252	-2.96826	0.00299489	0.0341923
ENST00000397126	ENSG00000160321	ZNF208	20.7225	-5.94451	1.68652	-3.52472	0.000423936	0.00684973
ENST00000397167	ENSG00000198879	SFMBT2	8650.02	-14.6731	1.54002	-9.52786	1.60553e-21	3.16588e-19
ENST00000397254	ENSG00000214019	RBM39P1	12.6033	-6.60652	1.75157	-3.77177	0.000162095	0.00304823
ENST00000397300	ENSG00000256745	ARPC3P3	16.2486	-6.49067	1.44607	-4.4885	7.17281e-06	0.000207602
ENST00000397412	ENSG00000007545	CRAMP1	210.673	-2.14626	0.503497	-4.26271	2.01967e-05	0.00050088
ENST00000397477	ENSG00000214076	CPSF1P1	18.7426	-6.20141	1.79791	-3.44922	0.000562203	0.0087192
ENST00000397496	ENSG00000172590	MRPL52	142.033	1.3034	0.457855	2.84676	0.00441662	0.0467362
ENST00000397640	ENSG00000257949	TEN1	136.378	1.41215	0.476817	2.96162	0.00306022	0.034823
ENST00000397843	ENSG00000196914	ARHGEF12	1133.16	-1.90492	0.411678	-4.62721	3.70616e-06	0.0001176
ENST00000397906	ENSG00000100154	TTC28	437.419	-2.27125	0.463401	-4.90127	9.52174e-07	3.59095e-05
ENST00000398146	ENSG00000185304	RGPD2	432.759	-10.3504	1.84816	-5.60034	2.13928e-08	1.14897e-06
ENST00000398212	ENSG00000146350	TBC1D32	317.362	-10.3957	3.00031	-3.46486	0.00053051	0.0083023
ENST00000398571	ENSG00000115464	USP34	1166.94	-1.50222	0.439478	-3.4182	0.000630359	0.00957189
ENST00000398587	ENSG00000253873	PCDHGA11	156.282	-1.45542	0.489098	-2.97572	0.00292299	0.0334821
ENST00000398594	ENSG00000254122	PCDHGB7	354.042	-1.73815	0.517808	-3.35673	0.000788689	0.0115565
ENST00000399002	ENSG00000172296	SPTLC3	62.0609	-2.63417	0.637524	-4.13188	3.59813e-05	0.000844643
ENST00000399262	ENSG00000171988	JMJD1C	204.606	-2.91814	0.489859	-5.95711	2.56734e-09	1.59626e-07
ENST00000399273	ENSG00000170160	CCDC144A	673.438	-10.9896	1.40731	-7.80898	5.76536e-15	7.04241e-13
ENST00000399410	ENSG00000103222	ABCC1	134.36	-10.5135	1.68156	-6.25225	4.04578e-10	2.83472e-08
ENST00000399438	ENSG00000113597	TRAPPC13	1459.58	-13.2473	2.50685	-5.28446	1.26075e-07	5.61361e-06
ENST00000399503	ENSG00000095015	MAP3K1	255.633	-2.2997	0.4684	-4.90968	9.12245e-07	3.47837e-05
ENST00000399586	ENSG00000215105	TTC3P1	32.1719	-1.99263	0.67363	-2.95805	0.00309595	0.0350253
ENST00000399720	ENSG00000248583		14.1533	-5.38246	1.68163	-3.20074	0.00137074	0.0182452
ENST00000399878	ENSG00000091490	SEL1L3	1457.89	-2.13235	0.481254	-4.43083	9.38715e-06	0.000260219
ENST00000400345	ENSG00000049759	NEDD4L	953.212	-11.884	2.01515	-5.89734	3.69409e-09	2.21694e-07
ENST00000400401	ENSG00000206455	TCF19	7166.11	-14.8417	2.99861	-4.94952	7.43966e-07	2.92563e-05
ENST00000400546	ENSG00000154654	NCAM2	71.8478	-5.22031	0.955343	-5.46433	4.64669e-08	2.36673e-06
ENST00000400590	ENSG00000180776	ZDHHC20	214.828	-1.29459	0.456726	-2.83449	0.00458985	0.0481777
ENST00000400908	ENSG00000142599	RERE	623.145	-1.82015	0.427606	-4.25662	2.07544e-05	0.000513087
ENST00000401073	ENSG00000162522	NHSL3	1047.27	-1.14182	0.399406	-2.85881	0.00425239	0.0455246
ENST00000401878	ENSG00000184863	RBM33	562.537	-1.51748	0.421297	-3.60193	0.000315859	0.0053429
ENST00000402558	ENSG00000186638	KIF24	104.248	-2.21489	0.768517	-2.88203	0.00395122	0.0428764
ENST00000402939	ENSG00000151276	MAGI1	746.385	-1.55947	0.450052	-3.46509	0.000530052	0.0083023
ENST00000403245	ENSG00000135315	CEP162	3658.32	-13.8495	0.951863	-14.5498	5.85328e-48	2.30837e-45
ENST00000403290	ENSG00000133794	BMAL1	1228.79	-12.3495	3.00025	-4.11616	3.85234e-05	0.000893679
ENST00000403458	ENSG00000159761	C16orf86	286.328	-9.75405	1.76676	-5.52086	3.37348e-08	1.75714e-06
ENST00000403491	ENSG00000162599	NFIA	341.464	-1.34147	0.421054	-3.18599	0.00144261	0.0189822
ENST00000403625	ENSG00000069020	MAST4	983.873	-1.76141	0.435521	-4.04437	5.24646e-05	0.00117083
ENST00000403662	ENSG00000100368	CSF2RB	278.104	-1.54745	0.512255	-3.02086	0.00252055	0.0298125
ENST00000404169	ENSG00000110931	CAMKK2	870.389	-1.384	0.467782	-2.95865	0.00308991	0.0350164
ENST00000404752	ENSG00000243244	STON1	352.788	-2.27795	0.684109	-3.3298	0.000869079	0.0125218
ENST00000404816	ENSG00000049323	LTBP1	672.401	-1.96602	0.517582	-3.79847	0.00014559	0.00279285
ENST00000404929	ENSG00000170264	FAM161A	1260.07	-11.8947	0.916269	-12.9817	1.55413e-38	4.98874e-36
ENST00000405312	ENSG00000243137	PSG4	1096.25	-6.85443	1.94893	-3.51703	0.00043641	0.00701685
ENST00000406334	ENSG00000273398		42.8823	-7.4404	1.42069	-5.23718	1.63048e-07	7.16737e-06
ENST00000407086	ENSG00000141376	BCAS3	139.68	-2.9009	0.691045	-4.19784	2.69471e-05	0.000646871
ENST00000407115	ENSG00000216906		20.3019	-6.81523	1.75056	-3.89318	9.89393e-05	0.00201722
ENST00000408903	ENSG00000171444	MCC	656.674	-12.0964	2.7882	-4.33841	1.43517e-05	0.000374473
ENST00000409418	ENSG00000137478	FCHSD2	936.51	-1.45667	0.4133	-3.52449	0.000424293	0.00684973
ENST00000409757	ENSG00000132405	TBC1D14	1289.03	-12.4142	2.56911	-4.83209	1.3511e-06	4.86925e-05
ENST00000409790	ENSG00000038532	CLEC16A	202.125	-11.0789	3.00331	-3.68889	0.000225231	0.00400627
ENST00000409792	ENSG00000181555	SETD2	571.728	-1.64556	0.485002	-3.3929	0.000691574	0.0103872
ENST00000409900	ENSG00000128656	CHN1	104.712	-10.2401	2.97461	-3.44251	0.000576339	0.00888176
ENST00000409959	ENSG00000121210	TMEM131L	20187.6	-15.8969	0.838878	-18.9502	4.3989e-80	6.0718e-77
ENST00000410020	ENSG00000135636	DYSF	10029.8	-2.32281	0.472584	-4.91512	8.87265e-07	3.4114e-05
ENST00000411545	ENSG00000229107	ABHD17AP4	11.3632	-5.05926	1.37859	-3.66988	0.000242663	0.00428322
ENST00000411836	ENSG00000232024	LSM12P1	537.866	-10.6632	2.7484	-3.8798	0.000104541	0.00210347
ENST00000412232	ENSG00000020181	ADGRA2	1362.03	-1.28996	0.411023	-3.13842	0.00169859	0.0217492
ENST00000412823	ENSG00000232616	SKIC2	561.956	-2.49737	0.646387	-3.86358	0.000111737	0.00221595
ENST00000413314	ENSG00000236895	GTF2H4	5978.36	-14.5781	2.1615	-6.74445	1.53603e-11	1.30875e-09
ENST00000413888	ENSG00000230207	RPL4P5	14.0207	-5.36858	1.6768	-3.20169	0.00136624	0.0182205
ENST00000414273	ENSG00000237973	MTCO1P12	391.591	1.65057	0.509339	3.24062	0.0011927	0.0162355
ENST00000414613	ENSG00000237522	NONOP2	41.9579	-6.97442	1.28366	-5.43323	5.53421e-08	2.76771e-06
ENST00000414990	ENSG00000223459	TCAF1P1	90.5642	-2.11593	0.538679	-3.928	8.56544e-05	0.00177254
ENST00000415323	ENSG00000232045	EHMT2	900.892	-12.37	3.0032	-4.11895	3.80605e-05	0.000885917
ENST00000415550	ENSG00000164002	EXO5	36.6306	-3.41006	0.799256	-4.26655	1.98522e-05	0.00049373
ENST00000416097	ENSG00000229253	ZBTB22	8064.23	-14.9383	2.75456	-5.4231	5.85737e-08	2.88748e-06
ENST00000416335	ENSG00000231370	PRRC2A	45400.8	-17.5052	2.99861	-5.83776	5.29071e-09	3.08134e-07
ENST00000416384	ENSG00000223932	GPANK1	161.352	-9.95771	3.00334	-3.31554	0.000914647	0.0130422
ENST00000417368	ENSG00000008311	AASS	390.583	-1.25466	0.436347	-2.87536	0.00403565	0.043587
ENST00000417894	ENSG00000235336	SLC44A4	236.014	-10.6158	2.65951	-3.99162	6.56224e-05	0.00141504
ENST00000418532	ENSG00000139737	SLAIN1	321.547	-10.2869	2.4079	-4.27214	1.93606e-05	0.000483245
ENST00000418944	ENSG00000233370	ACTR1AP1	49.183	-7.6107	1.35415	-5.62028	1.90653e-08	1.03605e-06
ENST00000419297	ENSG00000238084		8.73975	-6.07861	2.10767	-2.88404	0.00392605	0.0427039
ENST00000419313	ENSG00000238286	SLC35E1P1	27.5216	-6.79646	1.41859	-4.79101	1.65942e-06	5.75503e-05
ENST00000419915	ENSG00000228668	TRGV5P	42.5783	-7.888	2.11718	-3.72571	0.000194769	0.00354669
ENST00000420353	ENSG00000170653	ATF7	889.668	-1.46922	0.396662	-3.70395	0.000212265	0.00381
ENST00000420432	ENSG00000236353	PBX2	10495.5	-16.1084	3.00318	-5.36378	8.14993e-08	3.86576e-06
ENST00000420450	ENSG00000251247	ZNF345	793.787	-11.6667	1.99284	-5.85432	4.78974e-09	2.80139e-07
ENST00000420696	ENSG00000185630	PBX1	604.317	-1.61237	0.506802	-3.18147	0.00146531	0.0192328
ENST00000420843	ENSG00000137486	ARRB1	3078.32	-1.47543	0.494661	-2.98271	0.00285709	0.0327545
ENST00000421239	ENSG00000258405	ZNF578	30.1612	-3.16814	0.742523	-4.26673	1.98361e-05	0.00049373
ENST00000421274	ENSG00000227746	C4A	615.532	-11.2989	2.49013	-4.53748	5.69302e-06	0.000169721
ENST00000421745	ENSG00000115760	BIRC6	640.144	-1.87155	0.432701	-4.32527	1.52342e-05	0.000394517
ENST00000422774	ENSG00000122778	KIAA1549	364.034	-1.8876	0.485379	-3.88893	0.000100687	0.00204681
ENST00000422816	ENSG00000229944	EIF4EP2	106.668	-8.32625	2.0814	-4.00031	6.32592e-05	0.00137507
ENST00000422959	ENSG00000006576	PHTF2	174.796	-9.03995	2.60162	-3.47474	0.000511347	0.00803887
ENST00000423059	ENSG00000005108	THSD7A	234.65	-2.90464	0.573289	-5.06662	4.04944e-07	1.63913e-05
ENST00000423302	ENSG00000072952	IRAG1	115.072	-9.57509	2.55111	-3.75331	0.000174514	0.00324639
ENST00000423313	ENSG00000235750	KIAA0040	312.453	-3.04221	0.56344	-5.39936	6.68796e-08	3.21651e-06
ENST00000423556	ENSG00000156030	MIDEAS	949.456	-1.95023	0.470116	-4.1484	3.34808e-05	0.000791328
ENST00000423759	ENSG00000147133	TAF1	27221.2	-16.3282	0.847637	-19.2632	1.09435e-82	1.67836e-79
ENST00000423902	ENSG00000171316	CHD7	375.709	-1.51629	0.452914	-3.34784	0.000814426	0.0118707
ENST00000424120	ENSG00000048342	CC2D2A	122.858	-2.9513	0.890614	-3.31378	0.000920455	0.0130936
ENST00000424728	ENSG00000188738	FSIP2	15.228	-6.88413	1.69348	-4.06508	4.80158e-05	0.00109007
ENST00000424848	ENSG00000105810	CDK6	600.986	-3.49157	0.672917	-5.18871	2.11752e-07	9.10535e-06
ENST00000425044	ENSG00000243695		13.7741	-5.792	1.78474	-3.24529	0.0011733	0.0160189
ENST00000425241	ENSG00000177463	NR2C2	309.366	-1.45481	0.49733	-2.92525	0.00344179	0.0384361
ENST00000425675	ENSG00000063241	ISOC2	489.204	1.4184	0.383593	3.69767	0.000217588	0.00388535
ENST00000425953	ENSG00000233757	ZNF892	85.9237	-1.44198	0.507995	-2.83857	0.00453157	0.047784
ENST00000426049	ENSG00000231245	C1DP1	362.087	-10.9813	2.07586	-5.29001	1.22311e-07	5.49919e-06
ENST00000426677	ENSG00000130204	TOMM40	246.77	1.43398	0.484715	2.9584	0.00309245	0.0350164
ENST00000427089	ENSG00000249978	TRGV7	18.5773	-6.68614	1.58482	-4.21888	2.45523e-05	0.000593512
ENST00000427198	ENSG00000224892	RPS4XP16	12.5913	-6.11614	1.6008	-3.82067	0.000133089	0.00258737
ENST00000427363	ENSG00000131196	NFATC1	4380.21	-14.0925	1.58247	-8.90537	5.32064e-19	9.23505e-17
ENST00000427729	ENSG00000223766	PRR3	145.299	-10.6023	3.00336	-3.53016	0.000415313	0.00673627
ENST00000427888	ENSG00000239754	CFB	1479.02	-12.5642	2.58806	-4.85469	1.20573e-06	4.40281e-05
ENST00000428416	ENSG00000206449	MICB	768.916	-12.3254	2.83888	-4.34164	1.41422e-05	0.000370409
ENST00000428931	ENSG00000143569	UBAP2L	1745.96	-3.37664	0.661435	-5.10502	3.30768e-07	1.36694e-05
ENST00000429204	ENSG00000143772	ITPKB	1459.15	-2.40741	0.434543	-5.5401	3.02303e-08	1.58056e-06
ENST00000430275	ENSG00000293413		113.194	-8.41166	2.5597	-3.28619	0.00101552	0.0141874
ENST00000430298	ENSG00000214189	ZNF788P	42.4263	-2.72613	0.714497	-3.81545	0.000135933	0.00262785
ENST00000430479	ENSG00000006468	ETV1	122.599	-1.75505	0.520992	-3.36867	0.000755321	0.0111864
ENST00000431123	ENSG00000229006	TRIM27	27094.4	-17.2852	2.49891	-6.9171	4.60995e-12	4.24208e-10
ENST00000431877	ENSG00000138434	ITPRID2	123447	-18.5093	0.886941	-20.8687	1.03121e-96	1.42338e-92
ENST00000432829	ENSG00000107099	DOCK8	1286.11	-12.8484	3.0032	-4.27824	1.88381e-05	0.000474493
ENST00000432900	ENSG00000189180	ZNF33A	203.035	-1.40528	0.456466	-3.0786	0.00207975	0.025654
ENST00000432933	ENSG00000204221	WDR46	25083.9	-16.649	2.85289	-5.83583	5.3525e-09	3.10423e-07
ENST00000433197	ENSG00000178607	ERN1	290.098	-2.04649	0.670675	-3.05138	0.00227792	0.0273886
ENST00000433395	ENSG00000249624		479.261	-10.4992	1.09617	-9.57809	9.8852e-22	2.00655e-19
ENST00000433487	ENSG00000234475	HSPA1A	4931.91	-15.2306	1.99388	-7.63867	2.19472e-14	2.54569e-12
ENST00000433527	ENSG00000223612		14.1783	-5.83239	1.59733	-3.65133	0.000260887	0.00451192
ENST00000434269	ENSG00000242779	ZNF702P	2850.95	-13.0709	1.9548	-6.6866	2.28416e-11	1.89929e-09
ENST00000434457	ENSG00000137145	DENND4C	894.781	-1.91062	0.41727	-4.57887	4.67494e-06	0.000142762
ENST00000435607	ENSG00000007314	SCN4A	15.5183	-5.96561	1.6786	-3.55392	0.00037954	0.00625963
ENST00000435680	ENSG00000166912	MTMR10	1421.99	-1.54432	0.471271	-3.27693	0.00104942	0.0145831
ENST00000435875	ENSG00000227582	ADGRF5P1	32.2992	-6.59331	1.20199	-5.48534	4.12673e-08	2.13338e-06
ENST00000436291	ENSG00000231924	PSG1	588.78	-10.8337	2.97758	-3.63844	0.000274293	0.00470905
ENST00000436311	ENSG00000227046	DAXX	10639.6	-15.4173	2.99881	-5.14112	2.73102e-07	1.15279e-05
ENST00000437082	ENSG00000272410		310.613	-10.7378	2.68754	-3.99541	6.45826e-05	0.00139723
ENST00000438793	ENSG00000145730	PAM	38406	-17.2637	2.90434	-5.94411	2.77961e-09	1.7052e-07
ENST00000438828	ENSG00000138380	CARF	173.787	-9.03266	1.71792	-5.2579	1.45713e-07	6.44641e-06
ENST00000438911	ENSG00000291316	TMEM276-ZFTRAF1	563.012	-11.2232	3.00028	-3.74072	0.000183493	0.00338603
ENST00000439151	ENSG00000165671	NSD1	353.66	-2.11105	0.730682	-2.88915	0.00386288	0.0422791
ENST00000439343	ENSG00000259040	BLOC1S5-TXNDC5	73.3259	-9.9052	3.00354	-3.29784	0.000974305	0.0137088
ENST00000439741	ENSG00000014914	MTMR11	95.5119	-1.94275	0.586501	-3.31244	0.000924848	0.0131226
ENST00000440411	ENSG00000135473	PAN2	153.695	-1.98495	0.461433	-4.30171	1.69486e-05	0.000431626
ENST00000440869	ENSG00000112419	PHACTR2	1873.81	-1.49629	0.429152	-3.48662	0.00048916	0.00774298
ENST00000441339	ENSG00000172927	MYEOV	42.8869	-7.89847	2.40978	-3.27768	0.00104665	0.0145634
ENST00000441405	ENSG00000224941	TCF19	15222.9	-16.4544	2.40625	-6.8382	8.01947e-12	7.09569e-10
ENST00000442544	ENSG00000187323	DCC	171.372	-9.40626	2.04544	-4.59865	4.25247e-06	0.000131607
ENST00000443603	ENSG00000227322	RXRB	5407.84	-14.4311	1.63142	-8.84573	9.0933e-19	1.53067e-16
ENST00000443617	ENSG00000103657	HERC1	934.274	-1.54701	0.43324	-3.57079	0.000355908	0.00593308
ENST00000444645	ENSG00000236884	HLA-DRB1	94.4966	9.31973	3.00348	3.10297	0.00191587	0.0239971
ENST00000444717	ENSG00000261582		35.0987	-6.71457	1.3657	-4.91656	8.8077e-07	3.39589e-05
ENST00000445486	ENSG00000223752	ATAT1	1673.49	-12.737	1.51975	-8.381	5.24801e-17	7.54565e-15
ENST00000445744	ENSG00000230847	OCLNP1	16.3393	-6.04026	1.9219	-3.14286	0.00167306	0.0215021
ENST00000445902	ENSG00000223501	VPS52	14039.9	-16.3381	2.37434	-6.88112	5.93844e-12	5.42836e-10
ENST00000446197	ENSG00000100897	DCAF11	10145.9	-16.0595	3.00318	-5.34749	8.91813e-08	4.13077e-06
ENST00000446762	ENSG00000230034	PSMB8	25866.1	-17.0505	2.86142	-5.95873	2.54198e-09	1.58765e-07
ENST00000447906	ENSG00000164164	OTUD4	350.709	-1.4419	0.47478	-3.03698	0.00238957	0.0284094
ENST00000448116	ENSG00000160691	SHC1	2194.98	-1.26779	0.387403	-3.27253	0.0010659	0.0147421
ENST00000448647	ENSG00000229927	RHEBP1	143.533	-9.89564	2.59393	-3.81492	0.000136227	0.00262984
ENST00000449748	ENSG00000226850	ATP6V1G2	68.3379	-8.57274	2.49325	-3.43838	0.000585208	0.00898512
ENST00000450043	ENSG00000249319		89.6355	-8.07501	1.63257	-4.9462	7.56764e-07	2.96751e-05
ENST00000450053	ENSG00000160796	NBEAL2	509.511	-2.67364	0.451736	-5.91858	3.24724e-09	1.96586e-07
ENST00000450136	ENSG00000119401	TRIM32	11046.6	-15.0271	0.877891	-17.1172	1.10446e-65	8.46936e-63
ENST00000450689	ENSG00000164659	ELAPOR2	308.46	-1.80583	0.492876	-3.66386	0.00024844	0.00437958
ENST00000451531	ENSG00000196834	POTEI	41.457	-7.82741	2.65639	-2.94663	0.00321256	0.0361394
ENST00000451717	ENSG00000131831	RAI2	4769.4	-13.8133	1.98801	-6.94832	3.69658e-12	3.47102e-10
ENST00000453190	ENSG00000113594	LIFR	563.649	-2.13915	0.464661	-4.60369	4.15078e-06	0.000128749
ENST00000453304	ENSG00000182168	UNC5C	13.2742	-6.19389	1.7612	-3.51686	0.000436678	0.00701685
ENST00000453424	ENSG00000165406	MARCHF8	355.517	-10.1502	1.92199	-5.2811	1.28412e-07	5.69925e-06
ENST00000454349	ENSG00000100354	TNRC6B	472.312	-11.4382	3.00323	-3.80863	0.000139739	0.00269013
ENST00000454427	ENSG00000227420	MRPS18B	543.369	-11.0482	2.49478	-4.42852	9.48835e-06	0.000261935
ENST00000455036	ENSG00000205189	ZBTB10	369.039	-1.39015	0.461782	-3.0104	0.00260908	0.030468
ENST00000455505	ENSG00000232334		12.2188	-6.07198	1.78629	-3.39922	0.000675795	0.0102055
ENST00000455705	ENSG00000236826	LSM2	388.647	-2.17416	0.686277	-3.16805	0.00153465	0.0199461
ENST00000456430	ENSG00000144712	CAND2	1263.06	-11.8972	1.41342	-8.41731	3.85226e-17	5.59713e-15
ENST00000457540	ENSG00000225630	MTND2P28	4443.41	4.49506	1.22321	3.67482	0.000238018	0.00420661
ENST00000460006	ENSG00000101290	CDS2	1273.56	-1.29239	0.404325	-3.1964	0.00139153	0.0184508
ENST00000460726	ENSG00000233297	RASA4DP	227.269	-9.42169	1.09656	-8.59204	8.54403e-18	1.35555e-15
ENST00000465518	ENSG00000188060	RAB42	60.4901	-8.87926	2.11085	-4.20648	2.59379e-05	0.000625911
ENST00000465539	ENSG00000257267	ZNF271P	1482.99	-12.9216	3.00319	-4.30263	1.68781e-05	0.000430625
ENST00000465647	ENSG00000161048	NAPEPLD	1237.44	-12.3068	2.54955	-4.82704	1.38577e-06	4.9812e-05
ENST00000468660	ENSG00000102349	KLF8	36.9872	-3.50813	0.880312	-3.9851	6.74506e-05	0.00144121
ENST00000471951	ENSG00000101040	ZMYND8	566.734	-2.16519	0.691884	-3.12942	0.00175152	0.0223028
ENST00000474629	ENSG00000173193	PARP14	1754.99	-2.8595	0.494187	-5.78627	7.19677e-09	4.08794e-07
ENST00000475365	ENSG00000243746	EEF1A1P10	24.2507	-6.61298	1.42048	-4.65546	3.23251e-06	0.000103523
ENST00000478512	ENSG00000237451	CDK2AP2P2	14.9319	-6.36519	1.64645	-3.86601	0.00011063	0.00220258
ENST00000480336	ENSG00000254553		10.6637	-4.96338	1.75482	-2.82842	0.0046778	0.0489265
ENST00000480456	ENSG00000154721	JAM2	200.027	-2.14021	0.754587	-2.83626	0.00456449	0.0480211
ENST00000482081	ENSG00000219932	RPL12P8	19.5314	-5.85851	1.27702	-4.58764	4.48291e-06	0.00013812
ENST00000483910	ENSG00000064225	ST3GAL6	307.471	-10.2727	2.71665	-3.78137	0.000155965	0.00295713
ENST00000484016	ENSG00000182796	TMEM198B	12.1075	-5.15246	1.71148	-3.01052	0.00260802	0.030468
ENST00000484310	ENSG00000156171	DRAM2	342.55	-1.59943	0.566475	-2.82347	0.00475062	0.0494889
ENST00000487874	ENSG00000271741		84.3837	-1.68007	0.541375	-3.10334	0.00191346	0.0239887
ENST00000488192	ENSG00000293142		37.4035	-6.80683	1.35707	-5.01581	5.28095e-07	2.08862e-05
ENST00000489294	ENSG00000152332	UHMK1	807.614	-2.12468	0.672312	-3.16026	0.00157629	0.0204105
ENST00000489432	ENSG00000214022	REPIN1	338.913	-1.75246	0.447439	-3.91665	8.97888e-05	0.00185532
ENST00000492925	ENSG00000243422	RPL23AP49	14.2299	-6.78423	1.90328	-3.5645	0.000364556	0.00605984
ENST00000496166	ENSG00000105851	PIK3CG	521.653	-1.76715	0.482875	-3.65965	0.000252564	0.0044105
ENST00000496514	ENSG00000133256	PDE6B	46.8053	-8.5082	2.83914	-2.99675	0.00272876	0.0315542
ENST00000497933	ENSG00000183908	LRRC55	154.549	-9.26715	1.17033	-7.91843	2.40525e-15	3.01815e-13
ENST00000498707	ENSG00000163638	ADAMTS9	1470.9	-1.98922	0.425087	-4.67956	2.87494e-06	9.38129e-05
ENST00000502396	ENSG00000146147	MLIP	207.005	-9.28678	1.09026	-8.51798	1.62361e-17	2.43594e-15
ENST00000502486	ENSG00000188848	BEND4	280.96	-3.27442	0.667255	-4.90729	9.23422e-07	3.51129e-05
ENST00000502926	ENSG00000293454		30.3857	-7.39912	1.31869	-5.61097	2.01199e-08	1.08908e-06
ENST00000504123	ENSG00000138767	CNOT6L	1106.96	-1.5273	0.457517	-3.33824	0.000843103	0.0121985
ENST00000504595	ENSG00000183580	FBXL7	365.092	-1.87814	0.410882	-4.571	4.85393e-06	0.000147574
ENST00000506447	ENSG00000101639	CEP192	343.39	-2.60677	0.641481	-4.06368	4.8305e-05	0.00109483
ENST00000506455	ENSG00000164116	GUCY1A1	469.372	-10.4683	1.49346	-7.00943	2.39283e-12	2.30966e-10
ENST00000506502	ENSG00000275740		54.9041	-2.07531	0.718123	-2.88991	0.00385348	0.042214
ENST00000506594	ENSG00000188933	USP32P1	127.358	-9.54597	3.00338	-3.1784	0.00148089	0.0193934
ENST00000507489	ENSG00000170448	NFXL1	150.697	-10.1973	2.23031	-4.57215	4.8274e-06	0.000147092
ENST00000507897	ENSG00000213204		60.5329	-7.90366	1.72586	-4.57954	4.65999e-06	0.000142621
ENST00000508254	ENSG00000174130	TLR6	110.07	-1.87961	0.509188	-3.69139	0.000223028	0.00397733
ENST00000508784	ENSG00000151612	ZNF827	113.513	-1.57661	0.534982	-2.94704	0.00320832	0.0361211
ENST00000508874	ENSG00000249286	AMD1P3	10.4517	-5.84386	1.9172	-3.04811	0.00230283	0.0276562
ENST00000509018	ENSG00000158987	RAPGEF6	158.264	-1.90643	0.662737	-2.8766	0.00401984	0.0434501
ENST00000509479	ENSG00000196782	MAML3	693.402	-1.45927	0.436078	-3.34634	0.000818845	0.0119174
ENST00000509969	ENSG00000253333		20.7147	-6.84182	1.76127	-3.8846	0.0001025	0.00207449
ENST00000511745	ENSG00000251056	ANKRD20A17P	11.4487	-5.97709	2.11304	-2.82867	0.00467413	0.0489265
ENST00000511912	ENSG00000171503	ETFDH	973.988	-12.3835	2.84157	-4.35799	1.31264e-05	0.0003491
ENST00000512037	ENSG00000248971	KRT8P46	12.0045	-5.58649	1.63949	-3.40746	0.000655713	0.00992413
ENST00000512123	ENSG00000138759	FRAS1	87.916	-4.74087	0.828286	-5.72371	1.04223e-08	5.87178e-07
ENST00000512626	ENSG00000249931	GOLGA8K	194.384	-9.19457	1.71471	-5.36218	8.22234e-08	3.87836e-06
ENST00000512908	ENSG00000251634	NAIPP4	162.255	-9.37467	2.91753	-3.21323	0.00131253	0.0176063
ENST00000513042	ENSG00000214944	ARHGEF28	1106.86	-3.0542	0.696076	-4.38774	1.14533e-05	0.000308168
ENST00000513307	ENSG00000235043	TECRP1	17.3131	7.67475	1.72578	4.44713	8.7024e-06	0.000245141
ENST00000513440	ENSG00000134852	CLOCK	5579.07	-14.0415	0.889816	-15.7802	4.25599e-56	2.09805e-53
ENST00000513761	ENSG00000109572	CLCN3	1206.05	-2.65935	0.425633	-6.24798	4.15785e-10	2.88396e-08
ENST00000514280	ENSG00000248569		15.2169	-5.49061	1.50671	-3.64411	0.000268313	0.00461212
ENST00000514985	ENSG00000250722	SELENOP	1651.57	-2.10839	0.689893	-3.05612	0.00224224	0.0271013
ENST00000517395	ENSG00000072803	FBXW11	15768.9	-15.9568	0.938441	-17.0035	7.73887e-65	5.34098e-62
ENST00000517490	ENSG00000085719	CPNE3	1622.97	-1.23631	0.390924	-3.16253	0.00156405	0.0202709
ENST00000518137	ENSG00000173818	ENDOV	441.655	-10.7492	2.48038	-4.33368	1.46635e-05	0.000381887
ENST00000518498	ENSG00000160180	TFF3	192.366	-9.1202	2.96933	-3.07146	0.00213013	0.0260904
ENST00000518547	ENSG00000170873	MTSS1	550.788	-2.11663	0.484912	-4.36498	1.27137e-05	0.000340751
ENST00000518568	ENSG00000253598	SLC10A5	14.1367	-6.28401	1.74938	-3.59213	0.00032798	0.0055024
ENST00000518721	ENSG00000153317	ASAP1	2593.33	-2.54604	0.410038	-6.20929	5.3226e-10	3.60137e-08
ENST00000519289	ENSG00000288602	C8orf44-SGK3	41.6287	-8.33876	2.8148	-2.96247	0.00305185	0.0347851
ENST00000520358	ENSG00000157570	TSPAN18	808.628	-1.64853	0.546027	-3.01913	0.00253499	0.0299064
ENST00000520560	ENSG00000183808	RBM12B	6589.71	-14.2817	0.879871	-16.2316	3.01606e-59	1.81003e-56
ENST00000520790	ENSG00000253305	PCDHGB6	74.1922	-4.07453	0.953147	-4.27482	1.91292e-05	0.000480282
ENST00000522551	ENSG00000233913	RPL10P9	45.1678	5.34021	1.09615	4.8718	1.10584e-06	4.08972e-05
ENST00000523390	ENSG00000254221	PCDHGB1	18.0561	-3.74637	0.992489	-3.77472	0.000160186	0.00302056
ENST00000523392	ENSG00000172733	PURG	11.0251	-3.46154	1.11775	-3.09687	0.00195575	0.0243077
ENST00000523629	ENSG00000079102	RUNX1T1	120.979	-3.28194	0.610695	-5.3741	7.69665e-08	3.67602e-06
ENST00000524189	ENSG00000197892	KIF13B	1014.04	-1.39089	0.397305	-3.50082	0.000463832	0.00740148
ENST00000524821	ENSG00000213563	C8orf82	139.948	-2.45873	0.634677	-3.87399	0.000107069	0.00214184
ENST00000524981	ENSG00000188596	CFAP54	116.36	-1.62917	0.5294	-3.07739	0.0020882	0.0257352
ENST00000525031	ENSG00000213250	RBMS2P1	12.3559	-6.5793	1.37817	-4.77393	1.80669e-06	6.2034e-05
ENST00000526014	ENSG00000137726	FXYD6	2437.49	-12.8454	1.66686	-7.70632	1.295e-14	1.52777e-12
ENST00000526596	ENSG00000167323	STIM1	282.284	-1.70126	0.470147	-3.61856	0.000296242	0.00502338
ENST00000527633	ENSG00000137502	RAB30	163.06	-3.07805	0.619598	-4.96782	6.77097e-07	2.67028e-05
ENST00000527786	ENSG00000151702	FLI1	571.59	-1.26252	0.434191	-2.90775	0.00364044	0.0404255
ENST00000528464	ENSG00000254851		9.58716	-6.21053	1.86019	-3.33865	0.000841871	0.0121934
ENST00000529487	ENSG00000197816	CCDC180	16.3572	-3.47233	0.984764	-3.52605	0.000421808	0.00682558
ENST00000529694	ENSG00000120457	KCNJ5	8.88059	-6.10152	2.10128	-2.90371	0.00368769	0.0408516
ENST00000531380	ENSG00000174804	FZD4	5089.25	-1.38679	0.420746	-3.29601	0.00098068	0.0137844
ENST00000531738	ENSG00000064309	CDON	438.327	-10.7386	2.44262	-4.39635	1.10087e-05	0.000297363
ENST00000531758	ENSG00000254633	STRA6LP	17.6625	-5.71021	1.4184	-4.02582	5.67767e-05	0.0012519
ENST00000531871	ENSG00000254838	GVINP1	195.986	-2.73549	0.563306	-4.85614	1.19699e-06	4.3825e-05
ENST00000532219	ENSG00000254996	ANKHD1-EIF4EBP3	433.345	-2.09827	0.488986	-4.29105	1.77827e-05	0.000451202
ENST00000532405	ENSG00000140090	SLC24A4	15.9929	-6.95458	1.87144	-3.71617	0.000202264	0.00365904
ENST00000532415	ENSG00000254681	PKD1P5	164.451	-2.5052	0.723196	-3.46406	0.000532084	0.00831751
ENST00000532739	ENSG00000227827	PKD1P2	54.5758	-8.73053	2.10077	-4.15587	3.24048e-05	0.000769852
ENST00000532828	ENSG00000245680	ZNF585B	161.99	-1.53823	0.452753	-3.39751	0.000680025	0.0102472
ENST00000533601	ENSG00000139998	RAB15	419.751	-1.85987	0.482903	-3.85143	0.000117432	0.00231229
ENST00000533655	ENSG00000165490	DDIAS	221.174	-4.40067	0.606391	-7.25715	3.95323e-13	4.10274e-11
ENST00000534358	ENSG00000118058	KMT2A	257.135	-1.69247	0.511121	-3.31129	0.000928668	0.0131606
ENST00000535094	ENSG00000126217	MCF2L	106.044	-9.20833	1.97639	-4.65918	3.17479e-06	0.000101911
ENST00000535844	ENSG00000256861		245.448	-9.95818	1.16395	-8.55548	1.17377e-17	1.80018e-15
ENST00000536163	ENSG00000257093	DENND11	167.842	-10.8345	2.62881	-4.12144	3.76503e-05	0.000880826
ENST00000536441	ENSG00000149212	SESN3	1167.64	-2.01122	0.607182	-3.31239	0.000925041	0.0131226
ENST00000536944	ENSG00000255710	ISG20L2P2	28.841	-6.42795	1.37812	-4.66429	3.09679e-06	9.96386e-05
ENST00000537055	ENSG00000127903	ZNF835	66.5519	-7.64459	1.30124	-5.87484	4.23253e-09	2.50737e-07
ENST00000537107	ENSG00000235098	ANKRD65	61.7032	-8.90767	2.09488	-4.25211	2.11768e-05	0.000520113
ENST00000539664	ENSG00000255690	TRIL	96.8624	-4.56303	1.49302	-3.05625	0.00224125	0.0271013
ENST00000539909	ENSG00000156110	ADK	2377.3	-13.6185	2.53993	-5.36176	8.24149e-08	3.87836e-06
ENST00000541515	ENSG00000269955	FMC1-LUC7L2	153.305	-2.40909	0.562696	-4.28133	1.85778e-05	0.000468792
ENST00000543431	ENSG00000010219	DYRK4	96.3508	-8.14819	1.15032	-7.08344	1.40617e-12	1.38639e-10
ENST00000544040	ENSG00000111642	CHD4	1656.42	-1.31757	0.441311	-2.98559	0.00283031	0.0324745
ENST00000544301	ENSG00000026025	VIM	3819.44	-1.49488	0.40896	-3.65532	0.000256857	0.00445562
ENST00000544440	ENSG00000005810	MYCBP2	491.981	-2.91182	0.655254	-4.4438	8.83826e-06	0.000248461
ENST00000544916	ENSG00000111752	PHC1	439.11	-1.64223	0.426225	-3.85297	0.000116693	0.00230431
ENST00000546840	ENSG00000257767		150.689	-2.34315	0.515152	-4.54847	5.40368e-06	0.000162146
ENST00000547103	ENSG00000165899	OTOGL	52.3907	-8.67193	2.85861	-3.03362	0.0024164	0.0286543
ENST00000549884	ENSG00000076108	BAZ2A	636.017	-1.2644	0.413173	-3.06022	0.00221171	0.0268971
ENST00000549921	ENSG00000166225	FRS2	203.974	-2.42309	0.528651	-4.58354	4.57163e-06	0.000140539
ENST00000549987	ENSG00000125954	CHURC1-FNTB	92.7357	-10.2559	2.9448	-3.48271	0.000496366	0.00783907
ENST00000550078	ENSG00000257315	ZBED6	661.714	-2.7925	0.434851	-6.42173	1.34733e-10	1.01072e-08
ENST00000550402	ENSG00000174600	CMKLR1	749.155	-11.5835	2.02483	-5.72072	1.06072e-08	5.95169e-07
ENST00000551907	ENSG00000257954		9.46331	-5.19255	1.76838	-2.93633	0.00332118	0.0371493
ENST00000551964	ENSG00000120868	APAF1	314.749	-3.43937	0.641884	-5.35824	8.40378e-08	3.90686e-06
ENST00000552810	ENSG00000198707	CEP290	10662.7	-14.974	2.05573	-7.28402	3.24014e-13	3.44028e-11
ENST00000552981	ENSG00000075415	SLC25A3	167.203	-10.1168	2.6161	-3.86712	0.00011013	0.00219672
ENST00000554937	ENSG00000179899	PHC1P1	74.8525	-3.42486	0.616827	-5.55238	2.81809e-08	1.47901e-06
ENST00000555815	ENSG00000206190	ATP10A	23.292	7.13111	2.36402	3.01651	0.002557	0.0300377
ENST00000555846	ENSG00000180008	SOCS4	205.503	-1.57348	0.470524	-3.34411	0.000825478	0.0119812
ENST00000556476	ENSG00000227825	SLC9A7P1	35.3088	-8.10064	2.7706	-2.92379	0.00345799	0.0385858
ENST00000556564	ENSG00000070778	PTPN21	112.959	-2.13701	0.720601	-2.96559	0.00302103	0.0344622
ENST00000556887	ENSG00000118308	IRAG2	390.051	-10.566	2.99593	-3.52679	0.00042063	0.0068145
ENST00000557258	ENSG00000053254	FOXN3	492.191	-2.06158	0.516582	-3.99081	6.58468e-05	0.00141504
ENST00000559447	ENSG00000181827	RFX7	464.461	-1.187	0.412329	-2.87878	0.0039922	0.0432449
ENST00000559471	ENSG00000138593	SECISBP2L	1403.57	-1.49942	0.421402	-3.55817	0.000373448	0.00618812
ENST00000560891	ENSG00000104093	DMXL2	284.882	-2.3964	0.640023	-3.74424	0.000180944	0.00334346
ENST00000561100	ENSG00000166073	GPR176	322.748	1.77747	0.500789	3.54934	0.000386191	0.00634595
ENST00000564288	ENSG00000127603	MACF1	3395.49	-13.7635	2.68711	-5.12207	3.02203e-07	1.26403e-05
ENST00000566228	ENSG00000048471	SNX29	540.293	-1.44145	0.429265	-3.35796	0.000785203	0.01153
ENST00000566277	ENSG00000260290		36.095	-6.75573	1.01684	-6.64387	3.05544e-11	2.49552e-09
ENST00000566367	ENSG00000260549	MT1L	37.1564	2.3409	0.684133	3.42171	0.000622297	0.0094703
ENST00000569360	ENSG00000261459		108.245	-8.83333	2.29351	-3.85144	0.000117424	0.00231229
ENST00000569840	ENSG00000167889	MGAT5B	544.449	-11.0811	1.97567	-5.60877	2.03764e-08	1.09865e-06
ENST00000569858	ENSG00000293341		8.11879	-4.96948	1.71862	-2.89155	0.00383349	0.0420952
ENST00000570311	ENSG00000263142	LRRC37A17P	28.4716	-6.84974	1.63715	-4.18394	2.86499e-05	0.000685364
ENST00000571589	ENSG00000186260	MRTFB	804.239	-2.54321	0.472561	-5.38175	7.37665e-08	3.53541e-06
ENST00000571751	ENSG00000262634	SKA1	4334.57	-13.6773	0.878883	-15.5622	1.31522e-54	6.05134e-52
ENST00000572705	ENSG00000196689	TRPV1	192.577	-10.1504	3.00331	-3.37974	0.000725553	0.0107802
ENST00000573035	ENSG00000263001	GTF2I	314.33	-1.91718	0.469837	-4.08051	4.49363e-05	0.00102691
ENST00000575439	ENSG00000263163	SLC27A3	31.4222	-3.97582	0.934644	-4.25383	2.10145e-05	0.000517048
ENST00000575670	ENSG00000263324	HCN3	154.123	-9.89627	2.60612	-3.79731	0.000146272	0.00279639
ENST00000580133	ENSG00000263366	ABHD17AP5	17.9453	-6.63327	1.87092	-3.54545	0.000391945	0.00640997
ENST00000580170	ENSG00000173482	PTPRM	826.205	-2.79383	0.446359	-6.25915	3.8707e-10	2.73986e-08
ENST00000580243	ENSG00000179981	TSHZ1	513.303	-2.79592	0.468693	-5.96537	2.44086e-09	1.53142e-07
ENST00000581296	ENSG00000214425	LRRC37A4P	93.77	-3.54578	0.649221	-5.46159	4.71877e-08	2.3946e-06
ENST00000581897	ENSG00000266338	NBPF15	269.644	-2.94387	0.662632	-4.4427	8.88382e-06	0.000249235
ENST00000582970	ENSG00000173821	RNF213	123.614	-4.72039	0.673876	-7.00483	2.47291e-12	2.37039e-10
ENST00000583088	ENSG00000184185	KCNJ12	27.7079	2.89015	0.967433	2.98744	0.00281323	0.0323286
ENST00000585580	ENSG00000178093	TSSK6	57.2627	-8.31736	1.85942	-4.47308	7.70994e-06	0.000221248
ENST00000586022	ENSG00000267023	LRRC37A16P	35.6621	-7.14492	1.26131	-5.66467	1.47307e-08	8.1007e-07
ENST00000586569	ENSG00000141655	TNFRSF11A	277.27	-3.43214	0.582287	-5.89424	3.76415e-09	2.2492e-07
ENST00000586783	ENSG00000132016	BRME1	68.0392	-9.04923	1.2463	-7.26085	3.84668e-13	4.0224e-11
ENST00000587506	ENSG00000266910		11.8406	-5.56866	1.72187	-3.23407	0.00122039	0.0165635
ENST00000590474	ENSG00000108984	MAP2K6	111.507	-1.85872	0.541135	-3.43486	0.00059287	0.00907249
ENST00000590722	ENSG00000267699		52.2733	-7.7242	1.24016	-6.22839	4.71266e-10	3.20438e-08
ENST00000590734	ENSG00000237854	LINC00674	17.3516	-6.08804	1.4995	-4.06006	4.90604e-05	0.00110884
ENST00000591344	ENSG00000267041	ZNF850	3092.15	-13.19	0.834033	-15.8147	2.46246e-56	1.25887e-53
ENST00000591680	ENSG00000186566	GPATCH8	843.766	-1.22694	0.397679	-3.08526	0.00203374	0.0251764
ENST00000592299	ENSG00000176170	SPHK1	620.128	1.72458	0.509981	3.38165	0.00072053	0.0107287
ENST00000593682	ENSG00000269693		295.642	-11.6276	3.00326	-3.87166	0.000108095	0.00215925
ENST00000593731	ENSG00000268173		1451.97	-12.9854	1.59407	-8.14608	3.75908e-16	4.9891e-14
ENST00000594711	ENSG00000198153	ZNF849P	32.7072	-7.04797	1.441	-4.89103	1.00312e-06	3.76251e-05
ENST00000595685	ENSG00000268521	VN1R83P	20.3735	-6.32201	1.60499	-3.93898	8.18288e-05	0.00170359
ENST00000597188	ENSG00000142303	ADAMTS10	454.816	-11.2865	2.76148	-4.0871	4.36795e-05	0.00100151
ENST00000597582	ENSG00000152475	ZNF837	223.382	-9.39609	1.39428	-6.73902	1.59453e-11	1.35027e-09
ENST00000600506	ENSG00000269153	LYPLA2P2	8.35524	-6.01224	1.70892	-3.51815	0.000434565	0.00699918
ENST00000601674	ENSG00000268107		70.5415	-8.61872	1.89477	-4.54869	5.39812e-06	0.000162146
ENST00000602326	ENSG00000075151	EIF4G3	3451.77	-13.7205	2.10525	-6.51728	7.15941e-11	5.64693e-09
ENST00000602676	ENSG00000104904	OAZ1	1738.53	1.04826	0.370761	2.82731	0.00469413	0.0490114
ENST00000602923	ENSG00000293274		75.6865	-8.86155	2.58861	-3.42328	0.000618694	0.00943628
ENST00000603380	ENSG00000188321	ZNF559	196.816	-11.1507	3.00331	-3.7128	0.000204978	0.00369845
ENST00000604729	ENSG00000214655	ZSWIM8	590.971	-1.3346	0.40036	-3.3335	0.000857594	0.0123822
ENST00000605140	ENSG00000271503	CCL5	31.6668	-4.73965	0.985677	-4.80852	1.52053e-06	5.34042e-05
ENST00000605618	ENSG00000105699	LSR	99.2886	-10.0532	2.98901	-3.36338	0.000769937	0.0113662
ENST00000605930	ENSG00000096433	ITPR3	5607.29	-1.26601	0.420127	-3.01339	0.00258349	0.0302202
ENST00000606320	ENSG00000051825	MPHOSPH9	244.519	-1.88729	0.655345	-2.87985	0.00397871	0.0431407
ENST00000609104	ENSG00000148429	USP6NL	496.308	-1.49922	0.444722	-3.37115	0.000748562	0.0111101
ENST00000609438	ENSG00000185477	GPRIN3	99.2967	-3.27326	0.646208	-5.06533	4.07684e-07	1.6454e-05
ENST00000609928	ENSG00000169905	TOR1AIP2	376.541	-2.58033	0.662393	-3.89547	9.80093e-05	0.00200418
ENST00000610342	ENSG00000276114	CCL23	96.7466	-8.62706	2.86699	-3.0091	0.00262027	0.0305469
ENST00000611004	ENSG00000275338	RAB11FIP3	14362.3	-16.2918	0.950243	-17.1449	6.86488e-66	5.57388e-63
ENST00000611357	ENSG00000277131	MMEL1	17.7753	-6.619	1.7949	-3.68767	0.00022632	0.00401957
ENST00000611815	ENSG00000136169	SETDB2	115.45	-2.12077	0.743756	-2.85144	0.0043522	0.046209
ENST00000612118	ENSG00000278741	ABR	609.374	-6.19156	1.42566	-4.34295	1.40585e-05	0.000368963
ENST00000612450	ENSG00000276725	CEP170	36668.9	-17.6441	0.942744	-18.7157	3.68993e-78	4.24434e-75
ENST00000612690	ENSG00000275544	BDH1	15.0318	-5.91363	1.40685	-4.20344	2.62885e-05	0.000632162
ENST00000612848	ENSG00000276345		235.143	-5.47988	1.46838	-3.73193	0.000190019	0.00346936
ENST00000612905	ENSG00000234616	JRK	327.958	-1.3462	0.415367	-3.24099	0.00119116	0.0162305
ENST00000612978	ENSG00000278558	TMEM191B	7.92743	-5.93588	2.01547	-2.94515	0.00322794	0.0362828
ENST00000613206	ENSG00000144711	IQSEC1	889.702	-1.54173	0.490793	-3.14131	0.00168195	0.0215762
ENST00000613213	ENSG00000274376	ADAMTS7P1	48.4564	-7.58705	1.27622	-5.94492	2.76586e-09	1.7052e-07
ENST00000613252	ENSG00000276644	DACH1	156.51	-2.61377	0.753561	-3.46856	0.000523247	0.00820725
ENST00000613386	ENSG00000276550	HERC2P2	480.077	-1.80105	0.572647	-3.14514	0.00166009	0.0213553
ENST00000613549	ENSG00000272636	DOC2B	22848.3	-16.0734	2.11449	-7.60154	2.92623e-14	3.3659e-12
ENST00000613675	ENSG00000278845	MRPL45	5952.78	-14.5286	1.81061	-8.02415	1.02227e-15	1.33117e-13
ENST00000613746	ENSG00000275118	MBOAT7	4129.82	-14.1843	3.00244	-4.72427	2.30944e-06	7.7372e-05
ENST00000614479	ENSG00000173230	GOLGB1	4844.77	-14.6297	3.00318	-4.87139	1.10813e-06	4.08972e-05
ENST00000614556	ENSG00000136485	DCAF7	1844.34	-1.14151	0.374601	-3.04726	0.00230939	0.0276946
ENST00000614628	ENSG00000102221	JADE3	154.823	-1.5523	0.510893	-3.03841	0.00237832	0.0282999
ENST00000614830	ENSG00000048162	NOP16	357.029	1.29705	0.432964	2.99575	0.00273773	0.0316225
ENST00000615189	ENSG00000100003	SEC14L2	204.644	1.63173	0.546236	2.98722	0.00281526	0.0323286
ENST00000615305	ENSG00000277273	CDK7	10486.2	-16.0992	3.00318	-5.36072	8.28889e-08	3.87836e-06
ENST00000615637	ENSG00000251493	FOXD1	68.1141	3.59541	0.832222	4.32025	1.55851e-05	0.000399854
ENST00000615769	ENSG00000277594	DDX52	272.169	-3.94752	0.728274	-5.42038	5.94712e-08	2.92129e-06
ENST00000616023	ENSG00000275140	SEC22B3P	25.4048	-7.13908	2.33121	-3.06239	0.00219578	0.0267506
ENST00000616317	ENSG00000278540	ACACA	133.087	-2.11211	0.678722	-3.11189	0.00185895	0.0234544
ENST00000616448	ENSG00000227345	PARG	8018.41	-14.9727	0.933968	-16.0312	7.73315e-58	4.10541e-55
ENST00000617180	ENSG00000276681	LENG8	15126.5	-15.4776	2.97504	-5.20247	1.96654e-07	8.5628e-06
ENST00000617270	ENSG00000080298	RFX3	170.269	-1.52176	0.497572	-3.05836	0.00222549	0.0270005
ENST00000617688	ENSG00000276358	PLEKHM1	482.873	-2.11648	0.568588	-3.72234	0.000197385	0.00358016
ENST00000618012	ENSG00000276545	PCDHGB9P	6.86237	-5.72183	1.94422	-2.94299	0.00325054	0.0364774
ENST00000618265	ENSG00000204936	CD177	48.1933	-3.24678	1.12606	-2.88332	0.00393513	0.042769
ENST00000618405	ENSG00000277114	CNOT3	119.494	-8.4905	2.09184	-4.05886	4.93129e-05	0.00111039
ENST00000618519	ENSG00000278372	MYO19	435.753	-4.21797	0.657231	-6.41779	1.38263e-10	1.03159e-08
ENST00000618742	ENSG00000275591	XKR5	9.4699	-6.19545	1.94361	-3.18759	0.00143462	0.0188951
ENST00000618804	ENSG00000148541	FAM13C	158.139	-9.38923	2.93988	-3.19375	0.00140438	0.0186032
ENST00000619034	ENSG00000275618	BFAR	223.722	-1.61075	0.444912	-3.62039	0.00029416	0.0049942
ENST00000619038	ENSG00000239704	CDRT4	1116.37	-12.1118	2.04111	-5.93393	2.9576e-09	1.80363e-07
ENST00000619487	ENSG00000275176	ACACA	5193.08	-14.9696	2.32787	-6.43063	1.27072e-10	9.5846e-09
ENST00000619572	ENSG00000047346	ATOSA	75.8577	-2.06666	0.548458	-3.76814	0.000164469	0.00308446
ENST00000619583	ENSG00000278787	UBR7	160.911	-9.36265	2.93348	-3.19165	0.00141461	0.0187029
ENST00000619918	ENSG00000275793	RIMBP3	51.5874	-8.16648	2.14801	-3.80188	0.000143601	0.00276061
ENST00000620148	ENSG00000274487	NPEPPSP1	308.546	-10.7213	3.00326	-3.56987	0.000357154	0.00594668
ENST00000620290	ENSG00000276262	NSF	60362	-17.4759	1.57185	-11.1181	1.02465e-28	2.77318e-26
ENST00000620574	ENSG00000274320	GOLGA6L9	85.0941	-8.36778	2.23937	-3.73666	0.000186482	0.00342599
ENST00000620913	ENSG00000017483	SLC38A5	177.945	1.81847	0.49822	3.64993	0.000262311	0.00452584
ENST00000621049	ENSG00000277401	TJP1	42333.1	-16.964	1.5723	-10.7893	3.86714e-27	1.0265e-24
ENST00000621332	ENSG00000275023	MLLT6	100.405	-9.21332	2.52482	-3.64911	0.000263155	0.00453474
ENST00000621439	ENSG00000141337	ARSG	974.922	-11.9572	1.51314	-7.90226	2.73883e-15	3.40577e-13
ENST00000621469	ENSG00000114738	MAPKAPK3	16.7407	7.6267	1.78087	4.28258	1.84739e-05	0.000467025
ENST00000621686	ENSG00000275099	GGNBP2	545.278	-11.0947	2.99754	-3.70126	0.000214533	0.00384572
ENST00000621926	ENSG00000274679	SPATC1L	117.061	-8.46311	0.950408	-8.90471	5.35249e-19	9.23505e-17
ENST00000622145	ENSG00000234487	HLA-F	233.973	-9.90354	2.98638	-3.31624	0.000912382	0.0130234
ENST00000622189	ENSG00000275333	FAM120B	299.193	-1.36004	0.42847	-3.17419	0.00150257	0.0196215
ENST00000622235	ENSG00000244486	SCARF2	398.582	1.22523	0.424547	2.88598	0.00390196	0.0425539
ENST00000622403	ENSG00000277297	ATP5F1AP10	21.5539	-6.00235	1.60644	-3.73643	0.000186651	0.00342599
ENST00000622419	ENSG00000273574	LENG9	424.91	-10.3241	1.78326	-5.78943	7.06239e-09	4.04491e-07
ENST00000622569	ENSG00000275575	PTP4A3	919.251	-12.4755	2.82818	-4.41115	1.02822e-05	0.000281596
ENST00000622598	ENSG00000276111	SDCCAG8	43.3438	-8.88143	2.37933	-3.73275	0.000189401	0.00346724
ENST00000622643	ENSG00000278312	LENG9	188.235	-11.266	3.00332	-3.75118	0.000176002	0.00326965
ENST00000622835	ENSG00000274671	MARVELD2	86.0221	-9.16734	3.00348	-3.05223	0.00227145	0.0273434
ENST00000623535	ENSG00000008086	CDKL5	119.301	-3.11933	0.714729	-4.36435	1.27501e-05	0.000341066
ENST00000624291	ENSG00000278931		28.7617	-6.42355	1.64063	-3.91529	9.02952e-05	0.001863
ENST00000625684	ENSG00000281601	ZNF780B	1488.54	-13.0946	3.00319	-4.36023	1.29925e-05	0.000346207
ENST00000625753	ENSG00000280807	TUBGCP5	14.9365	-6.85711	1.89396	-3.62051	0.00029402	0.0049942
ENST00000626497	ENSG00000281894	ZKSCAN7	158.308	-9.8703	2.61094	-3.78036	0.000156603	0.00296514
ENST00000627896	ENSG00000278268	MOAP1	1539.94	-12.1829	1.57084	-7.75568	8.78736e-15	1.06396e-12
ENST00000629230	ENSG00000281233		20.0901	-5.89906	1.59825	-3.69095	0.000223422	0.00397923
ENST00000629245	ENSG00000281818	MANSC1	286.177	-1.93754	0.51668	-3.74999	0.000176845	0.0032809
ENST00000629689	ENSG00000278565	CEACAM21	90.4986	-8.53061	2.01786	-4.22755	2.3625e-05	0.000574112
ENST00000630854	ENSG00000281614	INPP5D	836.878	-2.83344	0.69388	-4.08347	4.4368e-05	0.00101561
ENST00000631876	ENSG00000276464	POMZP3	20.7388	-5.94558	1.59948	-3.7172	0.000201444	0.00364898
ENST00000632616	ENSG00000262334	RPH3AL	85.4589	-2.23924	0.74798	-2.99371	0.00275604	0.0317808
ENST00000633077	ENSG00000048740	CELF2	3354.63	-14.3323	2.30007	-6.23125	4.62717e-10	3.16182e-08
ENST00000633556	ENSG00000112297	CRYBG1	1765.46	-1.96476	0.461623	-4.2562	2.07931e-05	0.000513087
ENST00000633870	ENSG00000275932	DUSP14	10.9092	-6.39743	2.22748	-2.87205	0.00407823	0.0440123
ENST00000633930	ENSG00000204131	NHSL2	357.785	-2.35752	0.454242	-5.19001	2.10282e-07	9.07039e-06
ENST00000633985	ENSG00000276914	CEP20	58.1245	-8.33882	1.25178	-6.66157	2.7092e-11	2.2259e-09
ENST00000634039	ENSG00000274442	PRPF8	8015.76	-14.5633	1.49809	-9.72124	2.44789e-22	5.2794e-20
ENST00000634190	ENSG00000281976	ADAMTS7P1	12.7119	-3.90222	1.21804	-3.20368	0.00135683	0.0181476
ENST00000634212	ENSG00000282092	MED16	4105.16	-13.5959	2.97505	-4.56999	4.87747e-06	0.000147964
ENST00000635542	ENSG00000282895	RINL	55.6856	-1.74879	0.613183	-2.85198	0.00434474	0.046209
ENST00000636805	ENSG00000189195	BTBD8	746.081	-12.1066	2.79786	-4.32711	1.5108e-05	0.000391985
ENST00000637452	ENSG00000283391	EEF1B2	1421.52	-12.0663	2.33185	-5.17457	2.2844e-07	9.73197e-06
ENST00000638220	ENSG00000283780	MAML1	1049.69	-2.91117	0.642522	-4.53084	5.87488e-06	0.000174015
ENST00000638303	ENSG00000283847	HBP1	327.86	-1.71061	0.439611	-3.89118	9.97589e-05	0.00203093
ENST00000638807	ENSG00000184307	ZDHHC23	1475.81	-12.121	1.88395	-6.43381	1.24441e-10	9.48984e-09
ENST00000639021	ENSG00000283903	FGF11	154.175	-9.74859	1.98813	-4.90341	9.41874e-07	3.56183e-05
ENST00000640700	ENSG00000283963		43.6826	-7.92518	2.41033	-3.288	0.001009	0.0141107
ENST00000640769	ENSG00000176225	RTTN	568.17	-11.6695	3.00322	-3.88565	0.000102055	0.00206853
ENST00000641044	ENSG00000221970	OR2A1	12.9414	-6.15948	1.85412	-3.32204	0.000893615	0.0128085
ENST00000641967	ENSG00000284630		9.57758	-5.25651	1.86036	-2.82553	0.00472029	0.0492473
ENST00000642568	ENSG00000285408		70.3144	-8.68739	3.00355	-2.89237	0.0038235	0.0420189
ENST00000643531	ENSG00000281518	FOXO6	90.3723	-8.48791	1.78403	-4.75772	1.95791e-06	6.67284e-05
ENST00000643759	ENSG00000163554	SPTA1	27.497	-5.49516	1.16339	-4.7234	2.31938e-06	7.75166e-05
ENST00000643872	ENSG00000281766	RYBP	101.318	-1.59187	0.52081	-3.05653	0.00223912	0.0271013
ENST00000644978	ENSG00000138411	HECW2	402.529	-1.71375	0.467972	-3.66208	0.000250175	0.00438776
ENST00000645190	ENSG00000100416	TRMU	201.053	1.27978	0.432188	2.96115	0.00306489	0.0348473
ENST00000645319	ENSG00000133657	ATP13A3	73762.1	-17.7664	0.898567	-19.7719	5.20139e-87	1.43589e-83
ENST00000645495	ENSG00000137710	RDX	3534.45	-1.41838	0.38719	-3.66326	0.000249028	0.0043826
ENST00000646001	ENSG00000156869	FRRS1	72.8402	-2.15207	0.660249	-3.25948	0.00111617	0.0153298
ENST00000646038	ENSG00000166436	TRIM66	1547.98	-12.6309	2.03722	-6.20006	5.64424e-10	3.80033e-08
ENST00000646171	ENSG00000257524		43.1927	-3.52709	0.996027	-3.54116	0.00039837	0.00649964
ENST00000646201	ENSG00000284752	GMPR2	1006.73	-11.9328	2.55173	-4.67637	2.91992e-06	9.48322e-05
ENST00000646441	ENSG00000125266	EFNB2	1150.94	-1.57319	0.551497	-2.85258	0.00433665	0.046209
ENST00000646538	ENSG00000285438	SOX7	1093.61	-1.64311	0.499196	-3.29151	0.000996521	0.0139644
ENST00000646607	ENSG00000136160	EDNRB	332.872	-3.44756	1.05598	-3.2648	0.00109542	0.0150899
ENST00000646763	ENSG00000285502		101.734	-10.198	3.00344	-3.39543	0.000685198	0.0103138
ENST00000646931	ENSG00000188649	CC2D2B	13.8186	-6.25248	1.93484	-3.23151	0.00123136	0.0166632
ENST00000647397	ENSG00000285516	NAALAD2	213.145	-9.68846	2.98621	-3.2444	0.00117696	0.016053
ENST00000648336	ENSG00000114062	UBE3A	3301.86	-13.2828	1.9548	-6.79499	1.08323e-11	9.34487e-10
ENST00000648651	ENSG00000197879	MYO1C	2145.48	-1.90483	0.477773	-3.9869	6.69418e-05	0.00143255
ENST00000648686	ENSG00000285839		26.6835	-7.69496	1.55807	-4.93877	7.86161e-07	3.07405e-05
ENST00000648844	ENSG00000153207	AHCTF1	685.058	-1.71565	0.468618	-3.66109	0.000251147	0.00439364
ENST00000649191	ENSG00000221926	TRIM16	99.6669	-3.30699	0.750775	-4.40476	1.059e-05	0.00028831
ENST00000649368	ENSG00000092758	COL9A3	61.1604	-7.95017	1.19915	-6.62983	3.36068e-11	2.72867e-09
ENST00000649528	ENSG00000114861	FOXP1	11482	-15.0817	1.54001	-9.79321	1.20416e-22	2.68082e-20
ENST00000649768	ENSG00000283649	ZDBF2	1489.97	-13.2918	3.00319	-4.4259	9.60402e-06	0.000264599
ENST00000649912	ENSG00000285723		129.522	-9.49698	1.97057	-4.81941	1.43981e-06	5.11773e-05
ENST00000649979	ENSG00000115267	IFIH1	278.974	-3.43603	0.735157	-4.67388	2.95565e-06	9.55428e-05
ENST00000650287	ENSG00000175445	LPL	186.34	-9.50198	2.15577	-4.40769	1.04479e-05	0.000285005
ENST00000650831	ENSG00000181544	FANCB	146.429	-10.9037	3.00336	-3.63051	0.000282857	0.00483801
ENST00000651503	ENSG00000085276	MECOM	159.376	-2.04214	0.539005	-3.78872	0.000151427	0.00288297
ENST00000651671	ENSG00000148400	NOTCH1	3004.31	-1.99272	0.428158	-4.65416	3.25302e-06	0.000103939
ENST00000651725	ENSG00000166432	ZMAT1	367.928	-10.5158	1.90898	-5.50858	3.61738e-08	1.8771e-06
ENST00000651735	ENSG00000132170	PPARG	1442.45	-13.126	2.8898	-4.54218	5.56752e-06	0.000166339
ENST00000651917	ENSG00000164056	SPRY1	296.357	-10.8409	2.68587	-4.03626	5.43091e-05	0.00120713
ENST00000651943	ENSG00000198589	LRBA	507.464	-2.05535	0.433789	-4.73814	2.15684e-06	7.26119e-05
ENST00000652185	ENSG00000213020	ZNF611	2299.88	-13.7872	2.24493	-6.14149	8.17487e-10	5.39893e-08
ENST00000652629	ENSG00000163879	DNALI1	2386.38	-13.2493	1.53545	-8.62893	6.19288e-18	9.93958e-16
ENST00000656592	ENSG00000293428	C22orf46P	2945.15	-13.1197	0.858718	-15.2783	1.06737e-52	4.60404e-50
ENST00000658780	ENSG00000110427	KIAA1549L	456.062	-2.30135	0.478414	-4.81037	1.50653e-06	5.30476e-05
ENST00000665637	ENSG00000136237	RAPGEF5	972.063	-12.4064	2.1878	-5.67072	1.42198e-08	7.87711e-07
ENST00000669516	ENSG00000162086	ZNF75A	1837.1	-12.9169	2.06174	-6.26505	3.72713e-10	2.65696e-08
ENST00000671717	ENSG00000288264		24.9573	-6.65864	1.66609	-3.99657	6.42662e-05	0.00139458
ENST00000671838	ENSG00000288445	HPS5	114.438	-2.61903	0.74957	-3.49404	0.000475764	0.00755692
ENST00000672245	ENSG00000288191	MISP3	27.3597	-7.24699	2.34019	-3.09675	0.00195652	0.0243077
ENST00000672865	ENSG00000288243	STING1	142.838	-10.6879	3.00336	-3.55866	0.000372753	0.00618403
ENST00000674199	ENSG00000134324	LPIN1	249.478	-2.9094	0.645041	-4.51041	6.47028e-06	0.000188815
ENST00000674429	ENSG00000101846	STS	275.162	-1.6305	0.439588	-3.70916	0.000207946	0.00374221
ENST00000675179	ENSG00000310517		1270.64	-1.35704	0.444305	-3.05431	0.00225582	0.0272177
ENST00000677595	ENSG00000165071	TMEM71	476.087	-10.4893	1.26164	-8.31402	9.2514e-17	1.28987e-14
ENST00000679496	ENSG00000139793	MBNL2	1327.01	-12.3281	2.9957	-4.11528	3.86708e-05	0.000895593
ENST00000681320	ENSG00000114270	COL7A1	45.3704	3.41388	1.1744	2.90691	0.00365017	0.0404685
ENST00000681845	ENSG00000288699		54.3748	-8.24238	2.45695	-3.35472	0.000794449	0.0116286
ENST00000682017	ENSG00000088387	DOCK9	398.409	-2.26582	0.444999	-5.09174	3.54799e-07	1.46188e-05
ENST00000682029	ENSG00000109265	CRACD	118.21	-2.52235	0.585237	-4.30996	1.63287e-05	0.00041738
ENST00000682282	ENSG00000259803	SLC22A31	27.9503	-6.82001	1.47302	-4.62996	3.65739e-06	0.00011632
ENST00000682306	ENSG00000108389	MTMR4	217.538	-1.93814	0.50136	-3.86576	0.000110743	0.00220258
ENST00000682444	ENSG00000170322	NFRKB	17717.2	-15.7075	1.54289	-10.1805	2.4222e-24	5.97029e-22
ENST00000682506	ENSG00000160145	KALRN	112.378	-1.54309	0.541134	-2.85158	0.00435021	0.046209
ENST00000682557	ENSG00000173517	PEAK1	351.588	-1.6368	0.472647	-3.46304	0.000534115	0.0083398
ENST00000682579	ENSG00000189042	ZNF567	1405.89	-12.051	1.86296	-6.46873	9.88328e-11	7.70729e-09
ENST00000682582	ENSG00000106686	SPATA6L	95.0463	-8.56057	1.82379	-4.69384	2.6812e-06	8.87498e-05
ENST00000682720	ENSG00000111554	MDM1	2190.18	-13.5785	0.957017	-14.1884	1.08088e-45	4.14427e-43
ENST00000682850	ENSG00000229474	PATL2	29.7996	-6.8758	1.61787	-4.24991	2.13861e-05	0.000524319
ENST00000682979	ENSG00000144857	BOC	270.993	-10.0403	2.99596	-3.35127	0.000804427	0.0117373
ENST00000683103	ENSG00000168026	TTC21A	7.7606	-6.39943	1.82351	-3.5094	0.000449114	0.00718322
ENST00000683139	ENSG00000206560	ANKRD28	1302.25	-1.99404	0.467806	-4.26253	2.02123e-05	0.00050088
ENST00000683218	ENSG00000167216	KATNAL2	224.709	-10.2927	1.17464	-8.76243	1.91077e-18	3.13981e-16
ENST00000683244	ENSG00000130396	AFDN	1126.71	-1.56568	0.44761	-3.49786	0.000469015	0.00747553
ENST00000683345	ENSG00000154114	TBCEL	92.2713	-2.03256	0.702584	-2.89298	0.00381605	0.0420039
ENST00000683374	ENSG00000100221	JOSD1	4790.07	-13.8215	0.87887	-15.7264	9.96556e-56	4.74326e-53
ENST00000683648	ENSG00000114654	EFCC1	62.6617	-4.24146	0.949614	-4.46651	7.95077e-06	0.000226411
ENST00000683776	ENSG00000170949	ZNF160	1629.86	-12.2651	1.43779	-8.53049	1.45735e-17	2.21052e-15
ENST00000683788	ENSG00000096654	ZNF184	50.6704	-2.93893	0.637126	-4.61279	3.97291e-06	0.000123788
ENST00000683822	ENSG00000163946	TASOR	358.72	-1.69677	0.441042	-3.84717	0.000119488	0.00233942
ENST00000684022	ENSG00000166435	XRRA1	1374.48	-12.412	2.02891	-6.1176	9.49937e-10	6.21421e-08
ENST00000684092	ENSG00000136813	ECPAS	382.845	-2.07267	0.470136	-4.40865	1.04016e-05	0.000284305
ENST00000684111	ENSG00000284308	C2orf81	184.182	-10.1562	3.00332	-3.38167	0.000720474	0.0107287
ENST00000684270	ENSG00000155256	ZFYVE27	1113.87	-12.2031	2.55238	-4.78107	1.74366e-06	6.00193e-05
ENST00000684293	ENSG00000091409	ITGA6	6133.6	-2.48323	0.459599	-5.40303	6.55238e-08	3.16233e-06
ENST00000684351	ENSG00000179909	ZNF154	569.15	-10.7474	1.09467	-9.81796	9.4235e-23	2.13234e-20
ENST00000684373	ENSG00000133056	PIK3C2B	964.118	-1.87732	0.557732	-3.366	0.000762674	0.0112711
ENST00000684525	ENSG00000160336	ZNF761	2068.46	-12.6071	2.91176	-4.32971	1.49307e-05	0.000388115
ENST00000684775	ENSG00000105642	KCNN1	57.7572	-9.38166	2.91197	-3.22176	0.00127405	0.0172071
ENST00000685211	ENSG00000134369	NAV1	512.563	-1.58598	0.529043	-2.99782	0.00271914	0.0314869
ENST00000685551	ENSG00000124181	PLCG1	37.866	8.80406	1.32994	6.61987	3.59506e-11	2.86836e-09
ENST00000685559	ENSG00000159314	ARHGAP27	13216.1	-15.7026	0.953652	-16.4658	6.4627e-61	4.05476e-58
ENST00000686413	ENSG00000048052	HDAC9	311.573	-10.8377	3.00326	-3.60864	0.000307801	0.00521297
ENST00000687097	ENSG00000149187	CELF1	601.039	-1.18932	0.409066	-2.9074	0.00364451	0.0404383
ENST00000687212	ENSG00000099308	MAST3	2965.52	-13.1272	2.41765	-5.42974	5.64371e-08	2.79212e-06
ENST00000688009	ENSG00000196428	TSC22D2	13224.5	-15.6526	2.19211	-7.14045	9.30266e-13	9.30468e-11
ENST00000688547	ENSG00000140853	NLRC5	351.008	-1.56059	0.470273	-3.31847	0.000905128	0.0129425
ENST00000691173	ENSG00000142197	DOP1B	11543.1	-15.0895	1.47292	-10.2446	1.2514e-24	3.14056e-22
ENST00000691414	ENSG00000011405	PIK3C2A	1182.84	-2.89276	0.387888	-7.45772	8.80349e-14	9.96021e-12
ENST00000691995	ENSG00000163491	NEK10	26.6691	-4.13559	0.840681	-4.91934	8.68378e-07	3.36692e-05
ENST00000692225	ENSG00000147408	CSGALNACT1	1128.41	-2.53882	0.526578	-4.82135	1.42589e-06	5.08566e-05
ENST00000692848	ENSG00000251322	SHANK3	626.623	-1.65474	0.466577	-3.54655	0.000390314	0.00639087
ENST00000695636	ENSG00000168502	MTCL1	83.1974	-8.32962	2.82065	-2.95309	0.00314611	0.0355076
ENST00000695737	ENSG00000108021	TASOR2	13642.9	-16.2176	1.73852	-9.32842	1.07462e-20	2.06014e-18
ENST00000695854	ENSG00000100320	RBFOX2	32087.4	-17.0042	2.87762	-5.90913	3.43921e-09	2.07299e-07
ENST00000696125	ENSG00000131374	TBC1D5	1173.2	-1.28677	0.389395	-3.30454	0.000951307	0.01344
ENST00000696526	ENSG00000120278	PLEKHG1	1492.71	-3.05687	0.542828	-5.63139	1.78765e-08	9.75295e-07
ENST00000697201	ENSG00000183148	ANKRD20A2P	18.6798	-4.14587	1.16623	-3.55495	0.000378051	0.00624938
ENST00000697282	ENSG00000172014	ANKRD20A4P	92.8673	-8.56621	1.81174	-4.72817	2.26557e-06	7.60868e-05
ENST00000698835	ENSG00000268043	NBPF12	211.163	-4.71384	0.589588	-7.99515	1.29418e-15	1.63886e-13
ENST00000699294	ENSG00000180881	CAPS2	91.9877	-8.53411	1.01076	-8.44327	3.08587e-17	4.53131e-15
ENST00000703841	ENSG00000174197	MGA	5771.09	-14.0893	1.47292	-9.56554	1.11615e-21	2.23278e-19
ENST00000703967	ENSG00000118922	KLF12	120.07	-1.71702	0.564423	-3.04208	0.00234951	0.0281025
ENST00000707407	ENSG00000291395		12.2373	-5.57796	1.71083	-3.26038	0.00111265	0.0152967
ENST00000707427	ENSG00000291402	CROCCP3	102.25	-9.63721	2.1618	-4.45796	8.27452e-06	0.000234044
ENST00000708051	ENSG00000291582	ANKRD36	320.443	-11.0742	3.00326	-3.6874	0.000226561	0.00401957
ENST00000708361	ENSG00000291679	PCDHB6	40.8215	-7.8269	2.40254	-3.25776	0.00112296	0.0154077
ENST00000708365	ENSG00000291682	PCDHB8	91.8169	-8.11111	1.11264	-7.28996	3.10056e-13	3.3176e-11
ENST00000708383	ENSG00000291692	PCDHB13	24.0277	-2.24377	0.73843	-3.03857	0.00237707	0.0282999
ENST00000708739	ENSG00000291784	CCNB1IP1	45.3327	-7.52084	1.4144	-5.31735	1.05291e-07	4.76501e-06
ENST00000709063	ENSG00000291884	ZNF496	2076.73	-13.0149	1.68232	-7.7363	1.02354e-14	1.22851e-12
ENST00000709219	ENSG00000291926	CDC42P6	28.1158	-6.79643	1.46959	-4.62471	3.75122e-06	0.000118485
ENST00000709388	ENSG00000291969	MANBAL	140.172	-10.0928	2.22697	-4.53208	5.84054e-06	0.00017337
ENST00000709512	ENSG00000291995	GOLGA8A	1725.87	-12.3486	0.875356	-14.107	3.44052e-45	1.24972e-42
ENST00000709863	ENSG00000292155	RETSAT	832.508	-2.32107	0.460115	-5.04455	4.54589e-07	1.81875e-05
ENST00000709918	ENSG00000292165	SH3D19	869.315	-2.85202	0.435579	-6.54765	5.84497e-11	4.63667e-09
ENST00000710082	ENSG00000292214	KCND1	35.8834	-2.83432	0.781229	-3.62803	0.000285592	0.00487272
ENST00000710282	ENSG00000292231		292.97	-10.1959	1.00181	-10.1775	2.49987e-24	6.05364e-22
ENST00000710306	ENSG00000292244		135.089	-1.3164	0.454911	-2.89374	0.00380677	0.0419688
ENST00000710353	ENSG00000292254	SHANK3	1493.14	-1.74681	0.49311	-3.54244	0.000396443	0.00647587
ENST00000710506	ENSG00000284254	HNRNPH1	403.648	-11.3917	3.00324	-3.79312	0.000148764	0.00284009
ENST00000710924	ENSG00000292308	PRAG1	18929.3	-15.8011	2.97504	-5.31123	1.0889e-07	4.91181e-06
ENST00000711198	ENSG00000292338	DHRSX	219.382	-9.80924	1.88943	-5.19163	2.08456e-07	9.01979e-06
ENST00000711265	ENSG00000292366	VAMP7	18.4219	-7.15833	1.45779	-4.91039	9.08945e-07	3.47539e-05
