# Supplementary material for: The impact of heterozygous BRCA1 mutations on ovarian angiogenesis
Source: Research Square preprint supplement (doi:10.21203/rs.3.rs-7980820/v1), 2025-12-04
Supplement: Supplementary file 4 [file c3ee9b9e2ce0353ca7c6caac.xlsx]

## Sheet: Diseases & Functions
Categories	Diseases or Functions Annotation	p-value	-log10(p-value)	p-adjust	-log10(p-adj)	Absolute Value Z-score	Molecules	# Molecules
Organismal Injury and Abnormalities,Organismal Survival	Organismal death	1.56E-29	28.8069	5.39792e-29	28.2678	14.427	ABCB7,ABCC1,ABI1,ABR,ACACA,ACE,ACKR3,ACVR2A,ADAMTS9,ADAR,ADARB1,ADGRA2,ADGRF5,ADK,ADORA3,ADRA1D,ADRA2A,AFAP1L1,AFDN,AFF1,AHCTF1,AHR,AKAP13,AKAP9,ALDH2,AMOT,APAF1,APBA1,APOD,APP,AR,ARHGEF12,ARID2,ARID4A,ARRB1,ASL,ATE1,ATF6B,ATF7,ATP10A,ATP1A1,ATP7A,ATP7B,ATR,B3GNT5,BACE2,BCAS3,BCL2L11,BFAR,BIRC6,BMAL1,BMPR2,BMX,BRCA2,CALCRL,CAMKK2,CASK,CAST,CBL,CCDC150,CCN3,CCNB1IP1,CCR7,CD74,CDC14A,CDK19,CDK6,CDO…	414
Organismal Development	Size of body	1.66E-10	9.77989	2.72578e-10	9.56451	8.811	ADGRF5,ADK,AFF1,AHR,APBA1,APP,AR,ARHGEF28,ARID4A,ARRB1,BACE2,BCL2L11,BMAL1,BRCA2,CD74,CDK6,CDON,CELF1,CEP290,CHD7,CHN1,CLCN3,CLDN7,CNOT3,CNTNAP1,CSGALNACT1,CUL9,DPP4,E2F8,EBF1,EDNRB,EIF6,ETS1,ETV1,FAT4,FMO5,FST,GHR,GLCE,GMPPA,GPER1,HEY2,HIP1,HSPG2,IGF2R,IGFBP5,IL6,INPP5D,IRAK3,IRX5,ITPR3,ITPRID2,JAK1,JCAD,JPH4,KALRN,KCNQ1,KDM3B,KMT2E,LAMA4,LAMC1,LEF1,MAML1,MAMLD1,MBNL1,MBNL2,MBOAT7,MMP16,MRAP2,MY…	111
Developmental Disorder,Organismal Injury and Abnormalities,Organismal Survival	Death of embryo	1.08E-15	14.9666	2.56532e-15	14.5909	8.137	ABI1,ACACA,ACVR2A,ADAMTS9,ADAR,ADORA3,ADRA2A,AHCTF1,AHR,AKAP13,AMOT,APAF1,ARHGEF12,ATE1,ATF7,ATR,B3GNT5,BCL2L11,BIRC6,BMPR2,BRCA2,CALCRL,CAST,CCN3,CDK19,CHD4,CNOT3,CSDE1,DAXX,DDX39B,DYNC2H1,EFNB2,EHMT2,EIF6,EP300,EPAS1,ERC1,EZH2,FLI1,FLNB,FLT1,FOXM1,FOXO1,FOXP1,FRS2,GATA2,GTF2I,HSPG2,IFT172,KAT2B,KDR,KMT2A,KMT2C,LAMC1,LIFR,MACF1,MECOM,MED12,MTHFD2,MTOR,NCOA3,NCSTN,NF1,NFATC1,NR5A2,NRP2,PARG,PBX1,…	105
Developmental Disorder,Organismal Injury and Abnormalities	Growth failure or short stature	3.09E-13	12.51	6.28049e-13	12.202	8.091	ABI1,ACACA,ADAR,AHR,AKAP13,ALDH2,AMOT,ARSL,ATF7,ATP7B,ATP9A,ATR,BCAS3,BIRC6,BMAL1,BMPR2,BRCA2,CEP120,CEP295,CHD7,CHM,CLCN3,CLDN7,COL9A3,CRHBP,CSDE1,CSGALNACT1,DAXX,DCHS1,DYNC2H1,E2F8,EDNRB,EFNB2,EHMT2,EP300,EPS15,ERN1,ETS1,EXOC6B,EZH2,FBXW11,FLNB,FLT1,FRS2,FST,GHR,HAPLN1,HDAC6,HEY2,HIP1,HSPG2,IFT172,IL6,IQSEC1,ITGA2,ITGA6,ITGAX,ITPKB,ITPR3,JAM3,KALRN,KAT2B,KCNQ1,KDM3B,KIF24,KMT2A,KMT2C,KMT2E,LAMB…	111
Developmental Disorder,Organismal Injury and Abnormalities	Aplasia or hypoplasia	2.14E-14	13.6696	4.80899e-14	13.3179	7.924	ACE,ACVR2A,ADRA1D,ADRA2A,AFF1,AHR,AKAP13,APP,AR,ARID4A,ARRB1,ATF7,BCL2L11,BRCA2,CALCRL,CASK,CAST,CBL,CC2D2A,CDK5RAP2,CDK6,CDON,CEP290,CHD7,COL7A1,CRIM1,CSGALNACT1,DCC,DMXL2,DSTYK,EIF6,EPHA4,ERN1,ETS1,FOXM1,FRAS1,GGNBP2,GLCE,HEATR5B,HEY2,HGF,IGF2R,IL7,ITGA6,ITGA8,KCNN3,KMT2E,LAMC1,LAT,LEF1,LSR,MBOAT7,MECOM,MERTK,MMP16,MRTFB,MTOR,MYCBP2,NBAS,NEDD9,NF1,NFIA,NFIB,NOTCH1,NPR1,NR2C2,PAPOLG,PBX1,PBX2,PD…	100
Developmental Disorder,Organismal Injury and Abnormalities	Dysgenesis	3.76E-14	13.4248	8.30022e-14	13.0809	7.924	ACE,ACVR2A,ADRA1D,ADRA2A,AFF1,AHR,AKAP13,APP,AR,ARID4A,ARRB1,ATF7,BCL2L11,BCOR,BRCA2,CALCRL,CASK,CAST,CBL,CC2D2A,CDK5RAP2,CDK6,CDON,CEP290,CHD7,COL7A1,CRIM1,CSGALNACT1,DCC,DMXL2,DSTYK,EIF6,EPHA4,ERN1,ETS1,FOXM1,FRAS1,GGNBP2,GLCE,HEATR5B,HEY2,HGF,IGF2R,IL7,ITGA6,ITGA8,KCNN3,KMT2E,LAMC1,LAT,LEF1,LSR,MAP3K1,MBOAT7,MECOM,MERTK,MMP16,MRTFB,MTOR,MYCBP2,NBAS,NEDD9,NF1,NFIA,NFIB,NOTCH1,NPR1,NR2C2,PAPOLG,…	103
Developmental Disorder,Organismal Injury and Abnormalities	Growth failure	2.18E-09	8.66154	3.0922e-09	8.50973	7.849	ABI1,ACACA,ADAR,AHR,AKAP13,AMOT,ATF7,ATP7B,ATP9A,BCAS3,BIRC6,BMAL1,BMPR2,BRCA2,CHD7,CHM,CLCN3,CLDN7,CRHBP,CSDE1,CSGALNACT1,DAXX,DCHS1,E2F8,EDNRB,EFNB2,EHMT2,EP300,EPS15,ERN1,ETS1,EZH2,FBXW11,FLNB,FLT1,FRS2,FST,GHR,HEY2,IL6,ITGA6,ITGAX,ITPKB,ITPR3,JAM3,KALRN,KAT2B,KDM3B,KMT2A,KMT2C,KMT2E,LAMB2,MAML1,MED23,MMP16,MTOR,NCSTN,NOTCH1,PDE11A,PDE9A,PLCG1,PLPP3,PPARG,PTPN11,RASSF2,REST,RFX3,RXRB,SAMD9,SAT…	85
Organismal Injury and Abnormalities,Organismal Survival	Perinatal death	3.34E-08	7.47625	4.04358e-08	7.39323	7.783	ABR,ACKR3,ACVR2A,ADAMTS9,ADGRA2,APAF1,APBA1,ARID4A,ARRB1,B3GNT5,BIRC6,BMPR2,CASK,CDK6,CDON,CELF2,CLIP3,CRLF1,CSGALNACT1,DACH1,DCC,DCHS1,DCLRE1A,EPAS1,ETS1,FAT4,FOXM1,FOXP1,FST,GHR,GLCE,HAPLN1,HEY2,HGF,HIP1,HSPG2,IGF2R,INHBB,ITGA6,ITGB4,JAK1,JAM3,KMT2E,LAMA4,LAMC1,LIFR,LPL,LTBP1,MBOAT7,MLLT3,MMP16,MYCBP2,NEDD4L,NFIB,NUP98,PBX1,PBX2,PHC1,PLXND1,POMC,RCN3,REL,RFX3,RIPK4,RXRB,SCNN1B,SHANK3,SLC12A5,SL…	77
Cell Death and Survival	Cell survival	1.01E-17	16.9957	2.67905e-17	16.572	7.643	ABCA3,ABCC1,ABCG2,ACACA,ACE,ACER2,ACKR3,ACVR2A,ADAR,ADK,ADORA3,AGTPBP1,AHR,AKAP13,APAF1,APOD,APP,AR,ARFGEF2,ARID2,ARRB1,ATP6V1A,ATP7A,ATP7B,ATR,BCL2L11,BIRC6,BMX,BRCA2,CAMKK2,CASK,CBL,CCL5,CCN3,CCR7,CD74,CDC42BPA,CDK6,CDK7,CHD4,CHRNA7,CIT,CLEC11A,CLOCK,CLU,CSF2RB,CTDSPL,CUL9,CX3CL1,DAB2,DAXX,DCC,DCLRE1A,DDX39B,DGKA,DOCK8,DPP4,DUSP14,EBF1,EDA,EEF1B2,EFNB2,EHMT2,EP300,EPAS1,EPHA4,ERN1,EXO5,EZH2,FAM…	244
Cell Death and Survival	Cell viability	2.32E-17	16.6345	6.05744e-17	16.2177	7.601	ABCC1,ABCG2,ACACA,ACE,ACER2,ACKR3,ACVR2A,ADAR,ADK,ADORA3,AGTPBP1,AHR,AKAP13,APAF1,APOD,APP,AR,ARFGEF2,ARID2,ARRB1,ATP6V1A,ATP7A,ATP7B,ATR,BCL2L11,BIRC6,BMX,BRCA2,CAMKK2,CASK,CBL,CCL5,CCN3,CCR7,CD74,CDC42BPA,CDK6,CDK7,CHD4,CHRNA7,CIT,CLEC11A,CLOCK,CLU,CSF2RB,CTDSPL,CUL9,CX3CL1,DAB2,DAXX,DCC,DCLRE1A,DDX39B,DGKA,DOCK8,DPP4,DUSP14,EBF1,EDA,EEF1B2,EHMT2,EP300,EPAS1,EPHA4,ERN1,EXO5,EZH2,FAM171B,FANCB,F…	236
Developmental Disorder,Organismal Injury and Abnormalities	Hypoplasia	4.13E-12	11.384	7.76316e-12	11.11	7.43	ACE,ACVR2A,ADRA1D,ADRA2A,AFF1,AHR,AKAP13,AR,ARID4A,ARRB1,ATF7,BRCA2,CALCRL,CASK,CAST,CBL,CC2D2A,CDK6,CDON,CHD7,COL7A1,CRIM1,CSGALNACT1,DCC,DMXL2,DSTYK,EIF6,ERN1,ETS1,FOXM1,FRAS1,GGNBP2,GLCE,HEATR5B,HEY2,HGF,IL7,ITGA6,ITGA8,KMT2E,LAMC1,LAT,LSR,MBOAT7,MECOM,MMP16,MRTFB,MTOR,NBAS,NEDD9,NF1,NFIA,NFIB,NOTCH1,NPR1,NR2C2,PAPOLG,PBX1,PBX2,PDE11A,PDE9A,PHC1,PIK3CG,POGZ,POMC,PPARG,PRKCH,PRKDC,RASSF2,RBFOX2…	87
Developmental Disorder,Organismal Injury and Abnormalities	Hypoplasia of organ	6.58E-13	12.1818	1.2902e-12	11.8893	7.427	ACE,ACVR2A,AFF1,AHR,AKAP13,AR,ARID4A,ARRB1,ATF7,BRCA2,CALCRL,CASK,CAST,CBL,CC2D2A,CDK6,CDON,CHD7,CRIM1,CSGALNACT1,DCC,DMXL2,DSTYK,EIF6,ERN1,ETS1,FOXM1,FRAS1,GGNBP2,GLCE,HEATR5B,HEY2,HGF,IL7,ITGA6,ITGA8,KMT2E,LAMC1,LAT,LSR,MBOAT7,MECOM,MMP16,MRTFB,MTOR,NBAS,NEDD9,NF1,NFIA,NFIB,NOTCH1,NPR1,NR2C2,PBX1,PBX2,PDE11A,PDE9A,PHC1,PIK3CG,POGZ,POMC,PPARG,PRKCH,PRKDC,RASSF2,RBFOX2,RERE,SAMD9,SETD2,SHC1,SPEN,…	80
Cell Death and Survival	Cell viability of tumor cell lines	3.15E-11	10.5017	5.55556e-11	10.2553	6.505	ABCC1,ABCG2,ACACA,ACE,ACER2,ACKR3,ACVR2A,ADK,AHR,AKAP13,APP,AR,ARFGEF2,ARID2,ARRB1,ATP6V1A,ATP7B,ATR,BCL2L11,BIRC6,BMX,BRCA2,CAMKK2,CASK,CBL,CCN3,CD74,CDC42BPA,CDK6,CHRNA7,CIT,CLU,CTDSPL,CUL9,DAXX,DCC,DGKA,DPP4,DUSP14,EDA,EEF1B2,EHMT2,EP300,EPAS1,EPHA4,EZH2,FAM171B,FANCB,FANCM,FBXL7,FLI1,FLT1,FOXM1,GAB2,GATA2,GBP1P1,GSE1,GUCY1A1,HBP1,HGF,HIP1,HIPK3,HSPA1A,IER3,IGF2R,IGFBP5,IL24,IL6,IL7,IQGAP1,ITG…	159
Infectious Diseases,Organismal Injury and Abnormalities	Infection by RNA virus	6.55E-19	18.1838	1.80939e-18	17.7425	6.391	AASS,ABCC1,ACE,ADAR,ADK,ADORA3,ADRA2A,AFDN,AHCTF1,AHNAK2,AHR,AKAP13,ALDH2,APOD,APP,AR,ARFGEF1,ARFGEF3,ARHGAP27,ARHGEF12,ARRB1,ATP10A,ATP11A,ATP13A3,ATP1A1,ATP6V1A,BAZ2B,BCL9,BMAL1,BMX,CALCRL,CAMKK2,CBL,CC2D2A,CCL5,CCR7,CD74,CD93,CDK6,CECR2,CELF2,CFB,CHRFAM7A,CHRNA7,CIB1,CIT,CLIP3,CLOCK,CLU,CMKLR1,CRACD,CRIM1,CSF2RB,CSGALNACT1,CSMD2,CX3CL1,CYP1A1,CYSLTR1,DAB2,DACH1,DCC,DDIAS,DLGAP4,DOCK8,DOP1B,DPP…	249
Cellular Function and Maintenance	Cellular homeostasis	1.92E-16	15.7167	4.72906e-16	15.3252	6.305	ABCB7,ABCC1,ABCG2,ACBD5,ACE,ACER2,ACVR2A,ADGRF5,ADRA2A,AFDN,AFF1,AHR,ALDH2,AMOT,APAF1,APP,AR,ARFGEF1,ARFGEF3,ARRB1,ATG2A,ATP1A1,ATP2B4,ATP6V1A,ATP7A,ATP7B,BACE2,BCL2L11,BCOR,BFAR,BIRC6,BMAL1,BMPR2,CAMKK2,CAST,CBL,CCL23,CCL5,CCN3,CCR7,CD74,CDK6,CHD4,CHD7,CHRNA7,CLCN3,CLDN7,CLEC11A,CLEC16A,CNIH3,CPEB3,CSF2RB,CUL9,CX3CL1,CYSLTR1,DDX52,DGKA,DMXL2,DRAM2,EBF1,EDNRB,EFNB2,EFR3A,EHMT2,ELK4,EP300,EPAS1,EP…	244
Cellular Development,Cellular Growth and Proliferation	Cell proliferation of tumor cell lines	1.63E-18	17.7878	4.44142e-18	17.3525	6.282	ABCA3,ABCB7,ABCC1,ACACA,ACKR3,ACVR2A,ADAR,ADORA3,AHR,AMOT,APAF1,APP,AR,ARHGEF6,ARID2,ARID4A,ARRB1,ARRDC3,ATG2A,ATP9A,ATR,AXIN2,BACE2,BCL2L11,BCL9,BCOR,BIRC6,BMAL2,BMPR2,BMX,BRCA2,CALCRL,CAMKK2,CBL,CCDC80,CCDC88C,CCN3,CCNB1IP1,CD74,CDK19,CDK6,CDK7,CELF2,CEP20,CGNL1,CHD4,CLCN3,CLEC11A,CLU,CNOT3,CNOT6L,CPEB4,CSDE1,CSF2RB,CX3CL1,CYP1A1,DAB2,DACH1,DCC,DGKA,DOCK8,DOCK9,DOP1A,DPP4,DROSHA,DSTYK,E2F8,EBF1…	343
Organismal Injury and Abnormalities	Bleeding	1.12E-11	10.9508	2.04753e-11	10.6888	6.014	ABHD17AP4,ABI1,ACE,ACKR3,ADAR,ADGRA2,ADORA3,ADRA1D,ADRA2A,AMOT,ANO6,APP,AR,ARID4A,ATE1,ATF7,BIRC6,BMPR2,CARF,CDON,CELF1,CHRNA7,CLU,CMKLR1,E2F8,EPAS1,ERN1,F8,FLI1,FLRT2,FLT1,FOXM1,FOXP1,FRAS1,GABRP,GNA14,GUCY1A1,HEY2,HGF,HSPG2,IFT172,IL6,IRAK3,ITGA2B,JAM3,KCNQ1,KIT,KMT2A,LAMA4,LAMC1,LSR,LTBP1,MECOM,MERTK,MRTFB,MT-CO1,MT-CO2,MT2A,NBEAL2,NF1,NFATC1,NPR1,NPR3,NR3C2,NRP2,PDE4C,PLPP3,POMC,PPARG,PRDM1,P…	81
Cellular Movement	Cell movement	8.46E-30	29.0726	2.95804e-29	28.529	5.924	ABCA3,ABCC1,ABCG2,ABI1,ABR,ACACA,ACKR3,ADAR,ADARB1,ADGRA2,ADGRF5,ADORA3,ADRA2A,AFAP1L1,AFDN,AGTPBP1,AHR,AKAP9,ALDH2,AMOT,ANKRD28,ANKS1A,ANO6,APBA1,APOD,APP,AR,ARFGEF1,ARFGEF2,ARHGAP19,ARHGEF12,ARHGEF28,ARHGEF6,ARID2,ARRB1,ARRDC3,ASAP1,ASAP2,ATAT1,ATE1,ATG2A,ATP2B4,ATP7A,ATP9A,AXIN2,BCAS3,BCL9,BMPR2,BMX,BRCA2,C1QL3,C8orf44-SGK3,CALCRL,CAMKK2,CAST,CAVIN2,CBL,CCL23,CCL5,CCN3,CCR7,CD177,CD34,CD74,CD9…	417
Cellular Movement	Migration of cells	2.81E-28	27.5513	9.59044e-28	27.0182	5.86	ABCA3,ABCC1,ABCG2,ABI1,ABR,ACACA,ACKR3,ADAR,ADARB1,ADGRA2,ADGRF5,ADORA3,ADRA2A,AFAP1L1,AFDN,AGTPBP1,AHR,AKAP9,AMOT,ANKRD28,ANKS1A,ANO6,APBA1,APOD,APP,AR,ARFGEF1,ARFGEF2,ARHGEF12,ARHGEF28,ARHGEF6,ARID2,ARRB1,ARRDC3,ASAP1,ASAP2,ATAT1,ATE1,ATG2A,ATP2B4,ATP7A,ATP9A,AXIN2,BCAS3,BCL9,BMPR2,BMX,BRCA2,C1QL3,C8orf44-SGK3,CALCRL,CAMKK2,CAST,CAVIN2,CBL,CCL23,CCL5,CCN3,CCR7,CD177,CD34,CD74,CD93,CDC42BPA,CDK5…	388
Organismal Injury and Abnormalities	Abnormal abdomen morphology	5.96E-11	10.2248	1.02936e-10	9.98743	5.639	ACE,ACVR2A,ADK,ADRA1D,ADRA2A,AHR,AKAP13,AR,ARFGEF2,ARID4A,ATF6B,ATP6V1G2,AXIN2,BCL2L11,BRCA2,CAST,CC2D2A,CDK6,CEP120,CEP290,CEP295,CFB,CHD7,CLU,CRIM1,CRYBG1,CYP1A1,DCC,DSTYK,DYNC2H1,EDNRB,EIF6,EML4,EPAS1,FANCM,FAT4,FMO5,FOCAD,FOXO1,FOXP1,FRAS1,FST,GABRP,GGNBP2,GLCE,GTF2H4,HEPH,HGF,HLA-DRB1,IFT172,IGF2R,IL7,IRAK3,ITGA6,ITGA8,ITGB4,KCNQ1,KDR,KIT,KMT2E,LAMC1,LIFR,LRBA,LSM2,MAMLD1,MAP3K1,MED23,MERTK,…	118
Cell Morphology,Cellular Assembly and Organization,Cellular Function and Maintenance	Morphogenesis of cellular protrusions	1.16E-23	22.9355	3.63636e-23	22.4393	5.491	ABI1,ACACA,ACVR2A,ADAMTS9,ADGRA2,ADGRF5,AFAP1L1,AFDN,AGTPBP1,AHR,AKAP9,AMIGO3,APBA1,APP,AR,ARFGEF1,ARHGEF28,ARHGEF6,ARRB1,ASAP1,ATAT1,ATE1,ATL1,ATP7A,ATP9A,BOC,BTBD3,CAMKK2,CASK,CAST,CC2D2A,CCL5,CCN3,CCR7,CDC14A,CDC42BPA,CDKL5,CEP120,CEP162,CEP20,CEP290,CFAP54,CHN1,CIB1,CIT,CLU,CNTNAP1,CPEB3,CRIP1,CX3CL1,DAB2,DCC,DENND5A,DNMBP,DYNC2H1,EFNB2,EIF4G3,EP300,EPHA4,EPS15,EZH2,FAM161A,FBXO38,FNBP1L,FOXO…	187
Cardiovascular System Development and Function,Cellular Movement	Migration of endothelial cells	1.04E-10	9.98297	1.75676e-10	9.75529	5.456	ACACA,ACKR3,ADGRA2,AMOT,ARFGEF1,ARFGEF2,ARHGEF6,ATP2B4,ATP7A,BCAS3,BMPR2,BMX,CAVIN2,CCL5,CX3CL1,DPP4,EFNB2,ETS1,FLNB,FLT1,FOXO1,FOXP1,FRS2,GATA2,HGF,IGF2R,IL24,IQGAP1,ITGB4,KDM2B,KDR,KMT2A,MAP2K6,MCF2L,MTOR,NFATC1,NRP2,PIK3C2A,PIK3C2B,PIK3CG,PLCG1,PLD1,PLPP3,PLXND1,PPARG,PRKD2,PTP4A3,RCAN2,ROCK2,S100A2,SASH1,SLC38A5,SP1,STAB2,STC1,TEK,TGFBR2,THSD7A,TJP1,TNC,TNFRSF12A,TNS3,VAV3,VIM	64
Cellular Response to Therapeutics	Sensitivity of tumor cell lines	9.19E-09	8.03668	1.19661e-08	7.92205	5.368	ABCC1,ABCG2,ADAR,ADRA2A,AHR,AR,ARID2,ATR,BCL2L11,BFAR,BIRC6,BRCA2,CAMKK2,CBL,CDK6,CHD4,CHD7,CLCN3,CLU,CNOT3,CPEB4,DCAF7,DDX39B,DOP1B,DPP4,EP300,EPS15,ERN1,EZH2,FBXW11,FOXM1,FOXP1,FRS2,GAB2,GOLGA7,HERC2,HNRNPH1,IDE,IRAG2,KLF11,KMT2A,LPIN1,MAGI1,MBNL1,MCC,MED12,MED16,MTHFD2,NEDD9,NEK10,NF1,NIPBL,NPFFR2,NR2C2,PC,PIGO,PIK3C2B,PKP4,POLA1,PRKDC,PTPN11,RERE,RIPK4,RNF214,RPTOR,SKA1,SLC12A7,SLC38A5,ST6GAL…	86
Organismal Injury and Abnormalities	Abnormal morphology of head	4.52E-14	13.3449	9.82609e-14	13.0076	5.342	ABR,ACVR2A,ADAMTS9,ADGRA2,ADRA1D,ADRA2A,AHR,APAF1,APP,ARFGEF2,ARSG,ATL1,AXIN2,BCAS3,BCL2L11,BMAL1,BMPR2,BOC,CAST,CBLN1,CCN3,CCR7,CDC14A,CDK5RAP2,CDON,CECR2,CEP290,CFAP206,CHD7,CHM,CHN1,CLCN3,CMKLR1,CNOT3,CPEB3,CPEB4,CSGALNACT1,CX3CL1,DCC,DCHS1,EBF1,EDA,EDNRB,EFHC1,EFNB2,EP300,EPHA4,EPM2A,EPS15,ERC1,FAT4,FILIP1,FLNB,FOXP1,FST,FYCO1,GLCE,GMPPA,GTF2I,GUCY1A1,HAPLN1,HERC1,HEY2,HIP1,HSPG2,IFT172,INHBB…	148
Developmental Disorder,Organismal Injury and Abnormalities	Aplasia	9.16E-08	7.0381	1.05652e-07	6.97612	5.279	ADRA1D,ADRA2A,AHR,AKAP13,APP,AR,ARID4A,BCL2L11,BRCA2,CAST,CDK5RAP2,CDK6,COL7A1,DCC,EPHA4,FRAS1,GLCE,IGF2R,IL7,ITGA8,KMT2E,LAMC1,LEF1,MERTK,MTOR,MYCBP2,NEDD9,NFIA,NFIB,PBX1,PIK3CG,POMC,PRKDC,RASSF2,RERE,SPRY1,STIM1,TNFRSF11A	38
Developmental Disorder,Organismal Injury and Abnormalities	Agenesis	1.88E-07	6.72584	2.06821e-07	6.68441	5.279	AHR,AKAP13,APP,AR,ARID4A,BCL2L11,BRCA2,CAST,CDK5RAP2,CDK6,DCC,EPHA4,FRAS1,GLCE,IGF2R,IL7,ITGA8,KMT2E,LAMC1,LEF1,MERTK,MTOR,MYCBP2,NEDD9,NFIA,NFIB,PBX1,PIK3CG,POMC,PRKDC,RASSF2,RERE,SPRY1,STIM1,TNFRSF11A	35
Infectious Diseases,Organismal Injury and Abnormalities	Viral Infection	2.89E-23	22.5391	9.00312e-23	22.0456	5.241	AASS,ABCC1,ABI1,ACACA,ACE,ACVR2A,ADAMTS7P1,ADAR,ADARB1,ADK,ADORA3,ADRA1D,ADRA2A,AFDN,AHCTF1,AHNAK2,AHR,AKAP13,ALDH2,AMOT,APOD,APP,AR,ARFGEF1,ARFGEF3,ARHGAP27,ARHGEF12,ARRB1,ARRDC3,ATP10A,ATP11A,ATP13A3,ATP1A1,ATP6V1A,ATR,BAZ2B,BCL2L11,BCL9,BMAL1,BMX,BTBD3,CALCRL,CAMKK2,CBL,CC2D2A,CCL5,CCR7,CCSER2,CD74,CD93,CDC42BPA,CDK6,CDK7,CECR2,CELF2,CFB,CHRFAM7A,CHRNA7,CIB1,CIT,CLIP3,CLOCK,CLU,CMKLR1,CORO2B,C…	341
Cellular Response to Therapeutics	Sensitivity of cells	1.27E-09	8.8962	1.8704e-09	8.72807	5.155	ABCC1,ABCG2,ADAR,ADRA2A,AHR,ALDH2,AR,ARID2,ATR,BCL2L11,BFAR,BIRC6,BRCA2,CAMKK2,CBL,CDK6,CHD4,CHD7,CLCN3,CLU,CNOT3,CPEB4,CUL9,DCAF7,DDIAS,DDX39B,DOP1B,DPP4,EBF1,EP300,EPS15,ERN1,EZH2,FBXW11,FOXM1,FOXP1,FRS2,GAB2,GOLGA7,HERC2,HNRNPH1,IDE,IRAG2,KLF11,KMT2A,KMT2C,LEF1,LPIN1,MAGI1,MAP2K6,MBNL1,MCC,MED12,MED16,MTHFD2,MTOR,NEDD9,NEK10,NF1,NIPBL,NPFFR2,NR2C2,PC,PIGO,PIK3C2B,PKP4,PLD1,POLA1,PPARG,PRKDC,PT…	100
Cellular Assembly and Organization,Cellular Function and Maintenance	Organization of cytoskeleton	2.12E-35	34.6737	8.37945e-35	34.0768	5.138	ABCC1,ABI1,ABR,ACACA,ACVR2A,ADAMTS9,ADGRA2,ADGRF5,ADRA2A,AFAP1L1,AFDN,AGTPBP1,AHR,AKAP9,AMIGO3,AMOT,APBA1,APP,AR,ARFGEF1,ARHGEF28,ARHGEF6,ARRB1,ASAP1,ATAT1,ATE1,ATL1,ATP7A,ATP9A,BCAS3,BMX,BOC,BTBD3,CAMKK2,CASK,CAST,CBL,CC2D2A,CCDC88C,CCL5,CCN3,CCR7,CDC14A,CDC42BPA,CDK5RAP2,CDKL5,CEP120,CEP162,CEP170,CEP192,CEP20,CEP290,CFAP54,CGNL1,CHN1,CIB1,CIT,CLIP3,CLU,CNTNAP1,CORO2B,CPEB3,CRIP1,CUL9,CX3CL1,DA…	266
Cellular Assembly and Organization,Cellular Function and Maintenance	Organization of cytoplasm	4.30E-33	32.3665	1.62264e-32	31.7898	5.127	ABCC1,ABI1,ABR,ACACA,ACVR2A,ADAMTS9,ADGRA2,ADGRF5,ADRA2A,AFAP1L1,AFDN,AGTPBP1,AHR,AKAP9,AMIGO3,AMOT,APBA1,APP,AR,ARFGEF1,ARFGEF2,ARHGEF28,ARHGEF6,ARRB1,ARSG,ASAP1,ATAT1,ATE1,ATL1,ATP7A,ATP9A,BCAS3,BMX,BOC,BTBD3,CAMKK2,CASK,CAST,CBL,CC2D2A,CCDC88C,CCL5,CCN3,CCR7,CDC14A,CDC42BPA,CDK5RAP2,CDKL5,CEP120,CEP162,CEP170,CEP192,CEP20,CEP290,CFAP54,CGNL1,CHN1,CIB1,CIT,CLIP3,CLU,CNTNAP1,CORO2B,CPEB3,CRIP1,C…	280
Organismal Injury and Abnormalities	Abnormal morphology of body cavity	1.37E-20	19.8633	3.98256e-20	19.3998	5.052	ABCC1,ABCG2,ABI1,ACE,ACKR3,ACVR2A,ADAMTS9,ADAR,ADGRF5,ADK,ADORA3,ADRA1D,ADRA2A,AFDN,AHR,AKAP13,AKAP9,AR,ARFGEF3,ARHGEF12,ARID4A,ARRB1,ARSG,ATAT1,ATE1,ATF7,ATP7B,B3GNT5,BCAS3,BCL2L11,BMAL1,BMPR2,BMX,BRCA2,CALCRL,CAST,CBL,CCN3,CCR7,CDK6,CDK7,CDS2,CHD7,CIB1,CLCN3,CLDN7,CLU,CMKLR1,CNOT3,CRIM1,CSDE1,CSF2RB,CYP1A1,DAB2,DACH1,DCC,DCHS1,DDIAS,DGKA,DPP4,DYSF,EDNRB,EFNB2,EP300,EPAS1,EPM2A,EPS15,ERN1,ETS1,F…	222
Cardiovascular System Development and Function,Cellular Movement	Cell movement of endothelial cells	7.27E-13	12.1385	1.41992e-12	11.8477	5.028	ACACA,ACKR3,ADGRA2,AMOT,ARFGEF1,ARFGEF2,ARHGEF6,ATP2B4,ATP7A,BCAS3,BMPR2,BMX,CAVIN2,CCL5,CCN3,CX3CL1,DGKA,DPP4,EFNB2,ETS1,FLNB,FLT1,FOXO1,FOXP1,FRS2,GATA2,GTF2I,HGF,HSPG2,IGF2R,IL24,IQGAP1,ITGA2,ITGB4,KDM2B,KDR,KMT2A,MAP2K6,MCF2L,MTOR,MTSS1,NFATC1,NOTCH1,NRP2,PIK3C2A,PIK3C2B,PIK3CG,PLCG1,PLD1,PLPP3,PLXND1,PPARG,PRKD2,PTP4A3,PTPN11,RCAN2,ROCK2,S100A2,SASH1,SLC38A5,SP1,STAB2,STC1,TEK,TGFBR2,THSD7A,…	73
Cardiovascular System Development and Function,Organismal Development	Angiogenesis	1.87E-23	22.7282	5.84375e-23	22.2333	5.006	ABI1,ADAMTS9,ADGRA2,ADGRF5,ADRA2A,AHR,ALDH2,AMOT,APP,AR,ARID2,ATE1,ATP2B4,ATP7A,BCAS3,BIRC6,BMAL1,BMPR2,BMX,CALCRL,CAVIN2,CBL,CCL5,CCN3,CCR7,CD34,CD93,CDK6,CFB,CHD7,CHM,CHRNA7,CMKLR1,COL7A1,CX3CL1,CYSLTR1,DAB2,DGKA,DROSHA,DYNC2H1,DYSF,E2F8,EDNRB,EFNB2,EOGT,EPAS1,EPS15,ERN1,ETS1,EZH2,FLI1,FLNB,FLT1,FOLH1,FOXM1,FOXO1,FRS2,FZD4,GAB2,GATA2,GPER1,GTF2I,GUCY1A1,HDAC9,HEY2,HGF,HIF3A,HPS5,HSPG2,IGF2R,IGF…	184
Tissue Morphology	Quantity of cells	1.25E-18	17.9031	3.43407e-18	17.4642	4.998	ABCC1,ABCG2,ACACA,ACKR3,ACVR2A,ADAR,ADGRF5,ADORA3,AFF1,AHR,AKAP13,ALDH2,APAF1,APOD,APP,AR,ARHGEF6,ARID4A,ARSG,ATAT1,ATE1,ATP7A,B3GNT5,BCL2L11,BIRC6,BMAL1,BMAL2,BMPR2,BOC,BRCA2,C1QL3,CALCRL,CAMKK2,CBL,CCL5,CCR7,CD34,CD74,CDK19,CDK5RAP2,CDK6,CELF2,CEP120,CHD7,CHM,CIB1,CIT,CLCN3,CLEC11A,CLU,CMKLR1,CNOT3,CPEB3,CRLF1,CSDE1,CSF2RB,CUL9,CX3CL1,CYP1A1,CYSLTR1,DACH1,DAXX,DCC,DDIAS,DGKA,DOCK8,DPP4,DROSHA,D…	270
Cellular Assembly and Organization,Cellular Function and Maintenance	Microtubule dynamics	2.00E-31	30.699	7.27273e-31	30.1383	4.916	ABCC1,ABI1,ACACA,ACVR2A,ADAMTS9,ADGRA2,ADGRF5,AFAP1L1,AFDN,AGTPBP1,AHR,AKAP9,AMIGO3,APBA1,APP,AR,ARFGEF1,ARHGEF28,ARHGEF6,ARRB1,ASAP1,ATAT1,ATE1,ATL1,ATP7A,ATP9A,BMX,BOC,BTBD3,CAMKK2,CASK,CAST,CBL,CC2D2A,CCDC88C,CCL5,CCN3,CCR7,CDC14A,CDC42BPA,CDK5RAP2,CDKL5,CEP120,CEP162,CEP170,CEP192,CEP20,CEP290,CFAP54,CHN1,CIB1,CIT,CLIP3,CLU,CNTNAP1,CPEB3,CRIP1,CUL9,CX3CL1,DAB2,DCC,DENND5A,DNMBP,DYNC2H1,EFNB2,…	235
Organismal Injury and Abnormalities	Abnormal morphology of abdomen	9.65E-10	9.01547	1.45113e-09	8.83829	4.801	ABCG2,ACE,ACVR2A,ADAR,AHR,AKAP13,AR,ARFGEF2,ARFGEF3,ARID4A,ARSG,ATF7,ATP7B,B3GNT5,BCL2L11,BMAL1,BRCA2,CAST,CBL,CCN3,CCR7,CDK6,CLCN3,CLDN7,CLU,CNOT3,CRIM1,CSF2RB,CYP1A1,DACH1,DCC,DCHS1,DPP4,EDNRB,EP300,EPS15,ERN1,ETS1,FANCM,FAT4,FLI1,FOXM1,FOXO1,FRAS1,GATA2,GHR,GLCE,HGF,HSPG2,IGF2R,IGFBP5,IL6,IL7,INPP5D,IQGAP1,IRAG1,IRAK3,ITGA1,ITGA2B,ITGA6,ITGA8,ITPKB,JAK1,KCNQ1,KDM3B,KIT,KLF13,KMT2E,LAMB2,LAMC1,…	124
Molecular Transport	Transport of molecule	4.20E-10	9.37675	6.60377e-10	9.18021	4.776	ABCA3,ABCB7,ABCC1,ABCG2,ACACA,ACE,ADAR,ADORA3,ADRA2A,AHR,AKAP13,ANO6,APBA1,APP,ARFGEF2,ARHGEF12,ARRB1,ATP10A,ATP11A,ATP1A1,ATP2B4,ATP6V1A,ATP6V1G2,ATP7A,ATP7B,ATP9A,BACE2,BCL2L11,BMAL1,C1QL3,CALCRL,CBLN1,CCL5,CCR7,CD74,CEP290,CHRNA7,CLCN3,CLIP3,CLU,CSF2RB,CX3CL1,CYSLTR1,DDX39B,DOC2B,DOP1B,EDNRB,EP300,EPAS1,EPM2A,EPS15,ETS1,FLT1,FOXO1,FRAS1,FRRS1,FST,FZD4,GHR,GOLGA7,GPER1,HBP1,HCN3,HDAC6,HEPH,HERC…	196
Developmental Disorder,Organismal Injury and Abnormalities	Abnormal morphology of embryonic tissue	1.79E-11	10.7471	3.21942e-11	10.4922	4.701	ABI1,ACKR3,ACVR2A,ADAMTS9,AFDN,AHCTF1,AKAP13,AMOT,APAF1,AR,ARHGEF12,ARRB1,BCAS3,BIRC6,BMPR2,BRCA2,CDON,CHM,CNOT3,CSDE1,DAB2,DAXX,E2F8,EDA,EFNB2,EP300,EP400,EPS15,ERN1,EZH2,FRS2,GATA2,HAPLN1,HEY2,IFT172,ITGA6,LAMC1,LEF1,LTBP1,MACF1,MAML1,MAML3,MECOM,MMP16,MRTFB,MTOR,NCSTN,NF1,NOTCH1,NR5A2,NSD1,OFD1,PAM,PBX1,PBX2,PHC1,PLCB4,PLPP3,PLXNB1,PLXND1,PRDM1,PRKACB,PTPN11,REST,RIPK4,RPTOR,SETD2,SHC1,SMAD1,S…	83
Gene Expression	Transcription	7.15E-24	23.1457	2.26266e-23	22.6454	4.652	ACE,ACVR2A,AFDN,AFF1,AHR,AKAP13,AMOT,APBA1,APP,AR,ARID2,ARID4A,ARRB1,ARSG,ATF6B,ATF7,ATP2B4,ATP7A,BAZ2A,BCAS3,BCL9,BCOR,BMAL1,BMAL2,BMPR2,BMX,BRCA2,CAMKK2,CARF,CASK,CAVIN2,CCL5,CCN3,CD34,CD74,CDK5RAP2,CDK6,CDK7,CDON,CELF1,CEP290,CHD4,CHD6,CHD7,CHRNA7,CLOCK,CLU,CPEB3,CREBRF,CTDSPL,CX3CL1,DAB2,DACH1,DAXX,DCAF11,DCHS1,DROSHA,DYSF,E2F8,EBF1,EDA,EDNRB,EHMT2,ELK4,EP300,EPAS1,EPB41L4B,EPM2A,ERC1,ERN1,ET…	290
Cellular Movement	Cell movement of tumor cell lines	3.60E-14	13.4437	7.9646e-14	13.0988	4.635	ABCA3,ABCG2,ABR,ACKR3,ADAR,ADGRF5,AFAP1L1,AFDN,AGTPBP1,AHR,AMOT,ANKRD28,ANKS1A,APP,AR,ARFGEF1,ARFGEF2,ARHGEF12,ARHGEF28,ARHGEF6,ARID2,ARRB1,ARRDC3,ASAP1,ATE1,ATG2A,ATP7A,ATP9A,AXIN2,BCL9,BMPR2,CAMKK2,CAVIN2,CBL,CCL23,CCL5,CCN3,CCR7,CD74,CDK5RAP2,CDK7,CDKL5,CEP20,CLCN3,CLDN7,CLU,COL7A1,COL9A3,CPNE3,CX3CL1,DAB2,DOCK8,DOCK9,DPP4,DROSHA,E2F8,EDNRB,EHMT2,ENTREP1,EP300,EPAS1,EPHA4,ERC1,ETS1,EXOC6B,EZH2…	249
Gene Expression	Transactivation of RNA	3.45E-14	13.4622	7.64967e-14	13.1164	4.609	ACVR2A,ADAR,AHR,AKAP13,APBA1,APP,AR,ARHGEF12,ARRB1,AXIN2,BMPR2,BRCA2,CBL,CDK7,CHD4,CRIM1,CYP1A1,DAB2,DAXX,DPP4,DTX4,ELK4,EP300,EPAS1,ERN1,ETS1,FOXO1,GTF2I,HBP1,HGF,HIF3A,IFIH1,IGFBP5,IL6,INPP5D,JAK1,KAT2B,KLF13,KMT2A,LEF1,MACF1,MAP2K6,MAPKAPK3,MECOM,MYCBP2,NBEAL2,NCOA3,NEK9,NFATC1,NFIA,NFIB,NOTCH1,NR2C2,NR3C2,NR5A2,NRIP1,OSBPL1A,PLCB1,PPARG,PRDM1,PRKACB,PRKAR2B,PRKCQ,PRKDC,RASGRF2,REL,RORA,RXRB,S…	84
Cellular Function and Maintenance	Homeostasis of blood cells	1.22E-11	10.9136	2.21818e-11	10.654	4.526	AFF1,AHR,APAF1,ARRB1,ATP7A,BCL2L11,BCOR,BFAR,CBL,CCL5,CCN3,CCR7,CD74,CDK6,CHD4,CHD7,CLEC11A,CSF2RB,DGKA,EBF1,EFNB2,ELK4,EP300,EPAS1,EPHA4,ETS1,EZH2,FLI1,FLT1,FOXO1,FOXP1,GATA2,HGF,HLA-DRB1,IGF2R,IL18R1,IL6,IL7,INPP5D,IRAK3,ITPKB,JAK1,JAM3,KDR,KIT,KMT2A,LAT,LEF1,LTBP1,MCF2L,MECOM,MERTK,MTOR,NCSTN,NF1,NFATC1,NOTCH1,PBX1,PIK3CG,PIK3R2,PLCG1,PPARG,PRDM1,PREX1,PRKCH,PRKCQ,PRKDC,PTPN11,REL,RNF157,RORA,…	96
Cancer,Organismal Injury and Abnormalities	Growth of tumor	1.01E-13	12.9957	2.13531e-13	12.6705	4.497	ABCC1,ABCG2,ABI1,ACACA,ACE,ACKR3,ADAR,ADORA3,AFAP1L1,AFDN,AGTPBP1,AHR,AMOT,APCDD1,AR,ARID2,ARRDC3,ASL,ATP7A,ATP9A,AXIN2,BCL9,BFAR,BMAL1,BMPR2,BMX,BRCA2,CC2D2A,CCL5,CCN3,CCNB1IP1,CD34,CDK5RAP2,CDK6,CDK7,CDON,CHD4,CIB1,CLU,CNOT3,COL7A1,CRIP1,CSDE1,DACH1,DAXX,DCC,DGKA,DIRAS1,DOP1A,DOP1B,DPP4,DROSHA,EDNRB,EFNB2,EHMT2,EP300,EPAS1,ERN1,ETS1,EZH2,FAM171B,FBXO25,FBXO38,FBXW11,FLI1,FLT1,FOXD1,FOXM1,FOXO1,…	214
Cardiovascular Disease,Developmental Disorder,Organismal Injury and Abnormalities	Congenital heart disease	1.57E-13	12.8041	3.27766e-13	12.4844	4.447	ACKR3,ACVR2A,ADRA1D,ADRA2A,AHR,AKAP9,ATE1,ATP1A1,BCAS3,BCL9,BMPR2,CC2D2A,CCL5,CEP290,CHD4,CHD7,CORO2B,DCHS1,DYNC2H1,EDNRB,ETS1,FLT1,FMO5,FOXP1,GPC5,HEY2,HSPG2,IL6,ITPR3,KCNJ5,KCNQ1,KDR,KLF12,KLF13,LAMC3,LTBP1,MAML3,MRTFB,MT-CO1,MT-CO2,NCSTN,NF1,NFATC1,NOTCH1,PBX1,PBX2,PDE11A,PDE9A,PHC1,PLD1,PLXND1,PRDM1,PRKACB,PTPN11,RAI2,RBFOX2,RERE,RFX3,ROCK2,SCN3B,SMAD1,SMAD4,SOX7,TBC1D32,TFAP2A,TGFBR2,TGFBR3,…	69
Cellular Function and Maintenance	Homeostasis of leukocytes	8.86E-11	10.0526	1.51973e-10	9.81823	4.444	AFF1,AHR,APAF1,ARRB1,ATP7A,BCL2L11,BCOR,BFAR,CBL,CCL5,CCR7,CD74,CDK6,CHD4,CHD7,CLEC11A,CSF2RB,DGKA,EBF1,EFNB2,ELK4,EP300,EPHA4,ETS1,EZH2,FLI1,FLT1,FOXO1,FOXP1,GATA2,HGF,HLA-DRB1,IGF2R,IL18R1,IL6,IL7,INPP5D,IRAK3,ITPKB,JAK1,JAM3,KDR,KIT,KMT2A,LAT,LEF1,LTBP1,MCF2L,MECOM,MERTK,MTOR,NF1,NFATC1,NOTCH1,PBX1,PIK3CG,PIK3R2,PLCG1,PPARG,PRDM1,PREX1,PRKCH,PRKCQ,PRKDC,PTPN11,REL,RNF157,RORA,RPTOR,SATB1,SFRP1…	91
Gene Expression	Transactivation	4.06E-13	12.3915	8.10379e-13	12.0913	4.425	ACVR2A,ADAR,AHR,AKAP13,APBA1,APP,AR,ARHGEF12,ARRB1,AXIN2,BMPR2,BRCA2,CBL,CDK7,CHD4,CRIM1,CYP1A1,DAB2,DAXX,DPP4,DTX4,ELK4,EP300,EPAS1,ERN1,ETS1,FOXO1,GTF2I,HBP1,HGF,HIF3A,IFIH1,IGFBP5,IL6,INPP5D,JAK1,KAT2B,KLF13,KMT2A,LEF1,MACF1,MAP2K6,MAPKAPK3,MECOM,MYCBP2,NBEAL2,NCOA3,NEK9,NFATC1,NFIA,NFIB,NOTCH1,NR2C2,NR3C2,NR5A2,NRIP1,OSBPL1A,PLCB1,PLCG1,PPARG,PRDM1,PRKACB,PRKAR2B,PRKCQ,PRKDC,RASGRF2,REL,RORA,…	85
Cellular Movement	Migration of tumor cell lines	1.00E-13	13	2.12314e-13	12.673	4.416	ABCA3,ABCG2,ABR,ACKR3,ADAR,ADGRF5,AFAP1L1,AFDN,AGTPBP1,AHR,AMOT,ANKRD28,ANKS1A,APP,AR,ARFGEF1,ARHGEF12,ARHGEF6,ARID2,ARRB1,ARRDC3,ATE1,ATG2A,ATP7A,ATP9A,AXIN2,BCL9,BMPR2,CAMKK2,CAVIN2,CBL,CCL5,CCN3,CCR7,CD74,CDK5RAP2,CDK7,CDKL5,CEP20,CLDN7,CLU,COL7A1,COL9A3,CPNE3,CX3CL1,DAB2,DOCK8,DOCK9,DPP4,DROSHA,E2F8,EHMT2,EP300,EPAS1,EPHA4,ERC1,ETS1,EXOC6B,EZH2,FAM171B,FBXL7,FCHSD2,FLI1,FLNB,FLT1,FNBP1L,FOXD1…	235
Cellular Movement	Invasion of cells	3.16E-11	10.5003	5.56338e-11	10.2547	4.349	ABCA3,ABCG2,ABI1,ABR,ACKR3,ADAR,ADRA2A,AFAP1L1,AFDN,AGTPBP1,AHR,AKAP13,AMOT,APP,AR,ARID2,ARRDC3,ASAP1,ATP9A,BCL9,BMPR2,CAVIN2,CBL,CCN3,CCNB1IP1,CCR7,CD74,CDC42BPA,CDK6,CDK7,CELF2,CEP20,CIB1,CLDN7,CLU,COL7A1,COL9A3,CSDE1,CX3CL1,CYP1A1,DAB2,DGKA,DNMBP,DOC2B,DOCK8,DOCK9,DPP4,DROSHA,EDNRB,EP300,EPAS1,ERC1,ETS1,ETV1,EXOC6B,EZH2,FAM120B,FAM171B,FBXL7,FLT1,FNBP1L,FOLH1,FOXD1,FOXM1,FOXO1,FOXP1,FST,GAB2,G…	221
Cardiovascular Disease,Developmental Disorder,Organismal Injury and Abnormalities	Congenital anomaly of cardiovascular system	2.25E-13	12.6478	4.63918e-13	12.3336	4.343	ACKR3,ACVR2A,ADRA1D,ADRA2A,AHR,AKAP9,ATE1,ATP1A1,BCAS3,BCL9,BMPR2,CC2D2A,CCL5,CEP290,CHD4,CHD7,CORO2B,DCHS1,DYNC2H1,EDNRB,EFNB2,ETS1,FAT4,FLT1,FMO5,FOXO1,FOXP1,FZD4,GPC5,HEY2,HSPG2,IL6,ITPR3,KCNJ5,KCNQ1,KDR,KLF12,KLF13,LAMC3,LTBP1,MAML3,MRTFB,MT-CO1,MT-CO2,NCSTN,NF1,NFATC1,NOTCH1,PBX1,PBX2,PDE11A,PDE9A,PHC1,PIK3R2,PLD1,PLXND1,PRDM1,PREX2,PRKACB,PTPN11,RAI2,RBFOX2,RERE,RFX3,ROCK2,SCN3B,SMAD1,SMAD4…	75
Cellular Function and Maintenance	Lymphocyte homeostasis	3.03E-10	9.51856	4.82484e-10	9.31652	4.332	AFF1,AHR,APAF1,ARRB1,ATP7A,BCL2L11,BCOR,BFAR,CBL,CCL5,CCR7,CD74,CDK6,CHD4,CHD7,CLEC11A,DGKA,EBF1,EFNB2,ELK4,EP300,EPHA4,ETS1,EZH2,FLI1,FLT1,FOXO1,FOXP1,GATA2,HGF,HLA-DRB1,IGF2R,IL18R1,IL6,IL7,INPP5D,IRAK3,ITPKB,JAK1,KDR,KIT,KMT2A,LAT,LEF1,LTBP1,MCF2L,MERTK,MTOR,NF1,NFATC1,NOTCH1,PBX1,PIK3CG,PIK3R2,PLCG1,PPARG,PRDM1,PREX1,PRKCH,PRKCQ,PRKDC,PTPN11,REL,RNF157,RORA,RPTOR,SATB1,SFRP1,SH2B3,SHC1,SPTA1,…	88
Lymphoid Tissue Structure and Development,Tissue Morphology	Quantity of lymphoid cells	2.58E-14	13.5884	5.7461e-14	13.2406	4.329	ABCG2,ACACA,ACKR3,ADAR,AFF1,AHR,AKAP13,ALDH2,APP,ARHGEF6,ARID4A,B3GNT5,BCL2L11,BMAL1,CALCRL,CAMKK2,CBL,CCL5,CCR7,CD74,CDK6,CHD7,CMKLR1,CSF2RB,CYP1A1,CYSLTR1,DAXX,DGKA,DOCK8,EBF1,EFNB2,ELK4,EP300,EPHA4,EPS15,ETS1,EZH2,FCMR,FLI1,FLT1,FOXO1,FOXP1,GAB2,GATA2,GHR,GLCCI1,HGF,HLA-DRB1,IFIH1,IGF2R,IL6,IL7,INPP5D,IRAK3,ITGA2,ITGA6,ITPKB,ITPR3,JAK1,KIT,KLF12,KLF13,KMT2E,LAT,LCP1,MAML1,MAMLD1,MARCHF8,MCF2L,…	126
Hematological System Development and Function,Lymphoid Tissue Structure and Development,Tissue Morphology	Quantity of lymphocytes	4.51E-14	13.3458	9.82571e-14	13.0076	4.274	ABCG2,ACACA,ACKR3,ADAR,AFF1,AHR,AKAP13,APP,ARHGEF6,ARID4A,B3GNT5,BCL2L11,BMAL1,CALCRL,CAMKK2,CBL,CCL5,CCR7,CD74,CDK6,CHD7,CMKLR1,CSF2RB,CYP1A1,CYSLTR1,DAXX,DGKA,DOCK8,EBF1,EFNB2,ELK4,EP300,EPHA4,EPS15,ETS1,EZH2,FCMR,FLI1,FLT1,FOXO1,FOXP1,GAB2,GATA2,GHR,GLCCI1,HGF,HLA-DRB1,IFIH1,IGF2R,IL6,IL7,INPP5D,IRAK3,ITGA2,ITGA6,ITPKB,ITPR3,JAK1,KIT,KLF12,KLF13,KMT2E,LAT,LCP1,MAML1,MAMLD1,MARCHF8,MCF2L,MERTK,…	125
Neurological Disease,Organismal Injury and Abnormalities	Motor dysfunction or movement disorder	4.51E-12	11.3458	8.44569e-12	11.0734	4.255	ABCB7,ACKR3,ADORA3,ADRA1D,ADRA2A,AFF1,AHR,ALDH2,ANKHD1-EIF4EBP3,APBA1,APOD,APP,AR,ARFGEF3,ARHGAP27,ARRB1,ASAP1,ATL1,ATP11A,ATP6V1A,ATP7B,ATR,BAZ2B,BEND4,BMAL1,BRCA2,CAMKK2,CBL,CBLN1,CC2D2A,CCDC88C,CCL5,CD74,CDKL5,CELF2,CEP290,CHD6,CHN1,CHRNA7,CIT,CLCN3,CLU,CMKLR1,CNTNAP1,CORO2B,CRIM1,CX3CL1,DCC,DNALI1,DPP4,DUSP14,EFHC1,EFR3A,EP300,EPHA4,EPM2A,ETV1,FILIP1,FLRT2,FLT1,FOXN3,FOXP1,FST,FZD4,GABRP,GIGY…	211
Cardiovascular System Development and Function,Organismal Development	Vasculogenesis	7.67E-18	17.1152	2.04533e-17	16.6892	4.248	ABI1,ADAMTS9,ADGRA2,ADGRF5,ADRA2A,AHR,ALDH2,AMOT,APP,AR,ARID2,ATP7A,BMAL1,BMPR2,BMX,CALCRL,CAVIN2,CBL,CCL5,CCN3,CCR7,CD34,CDK6,CFB,CHD7,CMKLR1,COL7A1,CX3CL1,DAB2,DGKA,DROSHA,DYNC2H1,DYSF,EDNRB,EFNB2,EPAS1,EPS15,ERN1,ETS1,FLI1,FLT1,FOLH1,FOXM1,FOXO1,FRS2,FZD4,GPER1,GUCY1A1,HDAC9,HEY2,HGF,HIF3A,HPS5,HSPG2,IGFBP5,IL24,IL6,IQGAP1,ITGA1,ITGA2,ITGAX,JAM2,JAM3,KDR,KIT,KLF11,KMT2A,LAMA4,LAMC1,LEF1,LTBP1,…	147
Lymphoid Tissue Structure and Development,Tissue Morphology	Quantity of lymphatic system cells	1.32E-16	15.8794	3.3e-16	15.4815	4.239	ABCG2,ACACA,ACKR3,ADAR,AFF1,AHR,AKAP13,ALDH2,APP,ARHGEF6,ARID4A,B3GNT5,BCL2L11,BMAL1,BRCA2,CALCRL,CAMKK2,CBL,CCL5,CCR7,CD34,CD74,CDK6,CHD7,CIB1,CLEC11A,CMKLR1,CSF2RB,CYP1A1,CYSLTR1,DAXX,DGKA,DOCK8,EBF1,EFNB2,ELK4,EP300,EPHA4,EPS15,ETS1,EZH2,FCMR,FLI1,FLT1,FOXO1,FOXP1,GAB2,GATA2,GHR,GLCCI1,HGF,HLA-DRB1,IFIH1,IGF2R,IL6,IL7,INPP5D,IRAK3,ITGA2,ITGA6,ITPKB,ITPR3,JAK1,JAM2,JAM3,KIT,KLF12,KLF13,KMT2A,KM…	138
Cellular Movement	Homing of cells	1.03E-08	7.98716	1.32732e-08	7.87702	4.234	ABCC1,ACKR3,ADGRA2,ADORA3,AMOT,ANO6,APP,ARRB1,CBL,CCL23,CCL5,CCN3,CCR7,CD74,CLCN3,CLU,CMKLR1,CX3CL1,CYSLTR1,DGKA,DOCK8,DPP4,DYSF,EDNRB,EFNB2,ENTREP1,FLT1,FOXO1,FRS2,HDAC6,HGF,IGF2R,IL6,IL7,INPP5D,ITGA1,ITGA2,ITGA6,JAK1,JAM3,KDR,KIT,LAT,LCP1,LEF1,LIFR,LYST,MAP3K1,MT2A,MTOR,MTSS1,NEDD9,NOTCH1,NPR1,NRP2,PIK3CG,PLD1,PLXNB1,PLXND1,PPARG,PREX1,PRKCQ,PRKD2,PTGDR2,PTPN11,REL,RGS5,SHC1,SMAD4,SPHK1,ST6GAL1…	80
Cellular Movement	Invasion of tumor cell lines	4.16E-10	9.38091	6.56151e-10	9.183	4.19	ABCA3,ABCG2,ABI1,ABR,ADAR,ADRA2A,AFAP1L1,AFDN,AGTPBP1,AHR,AMOT,APP,AR,ARID2,ARRDC3,ASAP1,ATP9A,BCL9,BMPR2,CAVIN2,CBL,CCN3,CCR7,CD74,CDC42BPA,CDK6,CDK7,CEP20,CIB1,CLDN7,CLU,COL7A1,COL9A3,CSDE1,CX3CL1,DAB2,DGKA,DNMBP,DOCK8,DOCK9,DPP4,DROSHA,EP300,EPAS1,ERC1,ETS1,ETV1,EXOC6B,EZH2,FAM120B,FAM171B,FBXL7,FNBP1L,FOLH1,FOXD1,FOXM1,FOXO1,FOXP1,GAB2,GATA2,GGNBP2,GPR176,GSE1,HAPLN1,HBP1,HERC1,HEY2,HGF,HMGCS…	201
Post-Translational Modification	Phosphorylation of protein	9.15E-12	11.0386	1.68508e-11	10.7734	4.182	ACVR2A,AHR,APP,AR,ARRB1,ATR,B3GNT5,BIRC6,BMPR2,BMX,C8orf44-SGK3,CAMKK2,CBL,CCL5,CD109,CD34,CD74,CDC42BPA,CDK7,CDON,CIB1,CLIP3,CTDSPL,CX3CL1,DAXX,EDNRB,EFNB2,EIF4G3,EP300,EPHA4,EPM2A,ERN1,EZH2,FLT1,GHR,GPER1,HDAC6,HIPK3,HLA-DRB1,IL7,IQGAP1,IRAK3,ITGA2B,ITGA6,ITPKB,JAK1,KALRN,KDR,KIT,KLHL3,MAML1,MAP2K6,MAP3K1,MAST2,MERTK,MTOR,NEK10,NUAK1,PAK3,PEAK1,PELI2,PIK3CG,PLCG1,PRAG1,PRKAA2,PRKACB,PRKCH,PRKCQ…	91
Organismal Injury and Abnormalities	Edema	5.59E-13	12.2526	1.11355e-12	11.9533	4.157	ABI1,ACE,ADRA1D,ADRA2A,AHR,AR,ATP1A1,BIRC6,CALCRL,CD93,CEACAM21,CHD7,CRIM1,DPP4,FLRT2,FLT1,FOXM1,FOXP1,GABRP,GATA2,GPC5,HEY2,HGF,IFT172,IGF2R,IL6,IL7,INPP5D,IQGAP2,IRAK3,ITGB4,KCNQ1,KDR,KIT,KMT2A,MECOM,MRTFB,MTOR,MYOF,MYRIP,NF1,NFATC1,NPR1,NR3C2,NR5A2,NSD1,PAM,PARG,PBX1,PBX2,PDE11A,PDE9A,PFKFB3,PIK3C2B,PIK3CG,PJA2,PPARG,PTGDR2,PTPN11,RAPH1,ROCK2,RPS6KA2,SCNN1B,SCNN1G,SETD2,SFRP1,SLC12A5,SOX7,SPHK…	75
Hematological System Development and Function,Tissue Morphology	Quantity of mononuclear leukocytes	2.50E-14	13.6021	5.58036e-14	13.2533	4.137	ABCG2,ACACA,ACKR3,ADAR,AFF1,AHR,AKAP13,APP,ARHGEF6,ARID4A,B3GNT5,BCL2L11,BMAL1,CALCRL,CAMKK2,CBL,CCL5,CCR7,CD74,CDK6,CHD7,CLEC11A,CLU,CMKLR1,CSF2RB,CX3CL1,CYP1A1,CYSLTR1,DAXX,DGKA,DOCK8,EBF1,EFNB2,ELK4,EP300,EPHA4,EPS15,ETS1,EZH2,FCMR,FLI1,FLT1,FOXO1,FOXP1,GAB2,GATA2,GHR,GLCCI1,HGF,HLA-DRB1,IFIH1,IGF2R,IL6,IL7,INPP5D,IRAK3,ITGA2,ITGA6,ITPKB,ITPR3,JAK1,JAM3,JARID2,KIT,KLF12,KLF13,KMT2E,LAT,LCP1,MA…	130
Cellular Development,Cellular Growth and Proliferation,Nervous System Development and Function,Organismal Development,Tissue Development	Development of neural cells	2.14E-18	17.6696	5.79946e-18	17.2366	4.135	AASS,ABI1,ACVR2A,AFDN,AGTPBP1,AHR,AMIGO3,APBA1,APCDD1,APP,AR,ARFGEF1,ARHGEF28,ASAP1,ATL1,ATP7A,ATP9A,BOC,BTBD3,CAMKK2,CASK,CAST,CBLN1,CD93,CDK6,CDKL5,CEP290,CHD4,CHN1,CIB1,CIT,CLU,CNTNAP1,CPEB3,CRIP1,CX3CL1,DAB2,DCC,DENND5A,DLGAP4,EFNB2,EIF4G3,EP300,EPHA4,ETV1,EZH2,FBXO38,FLRT2,FNBP1L,FOXO1,FOXO6,FZD4,GATA2,GPRIN3,HDAC6,HDAC9,HERC1,HEY2,HGF,IL6,IQGAP1,IQSEC1,IRX5,ITGA1,ITGA6,ITSN2,JMY,KALRN,KAT2B…	161
Cellular Development,Cellular Growth and Proliferation,Nervous System Development and Function,Organismal Development,Tissue Development	Development of neurons	2.95E-18	17.5302	7.95148e-18	17.0996	4.127	AASS,ABI1,ACVR2A,AFDN,AGTPBP1,AHR,AMIGO3,APBA1,APCDD1,APP,AR,ARFGEF1,ARHGEF28,ASAP1,ATL1,ATP7A,ATP9A,BOC,BTBD3,CAMKK2,CASK,CAST,CBLN1,CDK6,CDKL5,CEP290,CHD4,CHN1,CIB1,CIT,CLU,CNTNAP1,CPEB3,CRIP1,CX3CL1,DAB2,DCC,DENND5A,DLGAP4,EFNB2,EIF4G3,EP300,EPHA4,ETV1,EZH2,FBXO38,FLRT2,FNBP1L,FOXO6,FZD4,GATA2,GPRIN3,HDAC6,HDAC9,HERC1,HEY2,HGF,IL6,IQGAP1,IQSEC1,IRX5,ITGA1,ITGA6,ITSN2,JMY,KALRN,KAT2B,KDR,KIF13B…	156
Hematological System Development and Function,Humoral Immune Response,Lymphoid Tissue Structure and Development,Tissue Morphology	Quantity of B lymphocytes	9.72E-11	10.0123	1.65306e-10	9.78171	4.095	ACKR3,ADAR,AFF1,AHR,AKAP13,APP,ARHGEF6,ARID4A,B3GNT5,BCL2L11,BMAL1,CCR7,CD74,DAXX,DOCK8,EBF1,EP300,EPS15,ETS1,EZH2,FCMR,FLI1,FLT1,FOXO1,FOXP1,HGF,IFIH1,IL6,IL7,INPP5D,ITPR3,JAK1,KMT2E,LCP1,MAML1,MGAT5B,MT2A,MTOR,NEDD9,NFATC1,NUP98,PBX1,PPARG,PRDM1,PRKCH,PTPN11,RASSF2,REL,RINL,RPTOR,SATB1,SFN,SH2B3,SHC1,SLC39A10,SPHK1,ST6GAL1,STAT1,TEC,TGFBR2,TNFRSF11A,TSC1,VAV3,WWTR1	64
Gene Expression	Transcription of RNA	1.05E-19	18.9788	3e-19	18.5229	4.092	ACVR2A,AFF1,AHR,AMOT,APP,AR,ARID2,ARID4A,ARRB1,ATF6B,ATF7,ATP2B4,BAZ2A,BCAS3,BCL9,BCOR,BMAL1,BMAL2,BMPR2,BMX,BRCA2,CAMKK2,CARF,CASK,CAVIN2,CD74,CDK5RAP2,CDK6,CDK7,CDON,CEP290,CHD4,CHD6,CHD7,CLOCK,CPEB3,CREBRF,CTDSPL,CX3CL1,DAB2,DACH1,DAXX,E2F8,EBF1,EDNRB,EHMT2,ELK4,EP300,EPAS1,ERC1,ERN1,ETS1,ETV1,EZH2,FBXW11,FLI1,FOXD1,FOXJ3,FOXM1,FOXN3,FOXO1,FOXO6,FOXP1,FST,FZD4,GAB2,GATA2,GHR,GPER1,GTF2H4,GTF2I…	231
Cell Death and Survival	Apoptosis	5.07E-21	20.295	1.5e-20	19.8239	4.086	ABCB7,ABCC1,ABCG2,ACACA,ACE,ACER2,ACKR3,ADAR,ADARB1,ADK,ADORA3,ADRA1D,AHCTF1,AHR,ALDH2,AMOT,ANO6,APAF1,APP,AR,ARHGEF6,ARID2,ARRB1,ARSG,ATAT1,ATE1,ATF7,ATG2A,ATP1A1,ATP2B4,ATP6V1G2,ATP7A,ATR,AXIN2,BCL2L11,BCOR,BFAR,BIRC6,BMPR2,BMX,BRCA2,CALCRL,CAMKK2,CAST,CBL,CCDC80,CCL5,CCN3,CCR7,CD74,CDK19,CDK6,CDON,CECR2,CELF1,CELF2,CEP120,CFB,CGNL1,CHD4,CIB1,CIT,CLDN7,CLEC11A,CLIP3,CLU,CNOT3,CPEB4,CRIP1,CRLF1,…	371
Gene Expression	Transcription of DNA	1.08E-18	17.9666	2.97521e-18	17.5265	4.073	ACVR2A,AFF1,AHR,AMOT,APP,AR,ARID2,ARID4A,ARRB1,ATF6B,ATF7,ATP2B4,BCAS3,BCL9,BCOR,BMAL1,BMAL2,BMPR2,BRCA2,CAMKK2,CARF,CASK,CAVIN2,CD74,CDK5RAP2,CDK6,CDK7,CDON,CEP290,CHD4,CHD6,CHD7,CLOCK,CPEB3,CREBRF,CX3CL1,DAB2,DACH1,DAXX,E2F8,EBF1,EDNRB,EHMT2,ELK4,EP300,EPAS1,ERC1,ETS1,ETV1,EZH2,FBXW11,FLI1,FOXD1,FOXJ3,FOXM1,FOXN3,FOXO1,FOXO6,FOXP1,FST,FZD4,GATA2,GPER1,GTF2H4,GTF2I,GTF3C1,HBP1,HDAC6,HDAC9,HEY2,H…	201
Cellular Movement	Chemotaxis	4.73E-09	8.32514	6.40054e-09	8.19378	4.06	ABCC1,ACKR3,ADGRA2,ADORA3,AMOT,ANO6,APP,ARRB1,CBL,CCL23,CCL5,CCN3,CCR7,CD74,CLCN3,CLU,CMKLR1,CX3CL1,CYSLTR1,DGKA,DOCK8,DPP4,DYSF,EDNRB,EFNB2,ENTREP1,FLT1,FRS2,HDAC6,HGF,IGF2R,IL6,IL7,INPP5D,ITGA1,ITGA2,ITGA6,JAM3,KDR,KIT,LAT,LCP1,LEF1,LIFR,LYST,MAP3K1,MT2A,MTOR,MTSS1,NEDD9,NOTCH1,NPR1,NRP2,PIK3CG,PLD1,PLXNB1,PLXND1,PPARG,PREX1,PRKCQ,PRKD2,PTGDR2,PTPN11,REL,RGS5,SHC1,SMAD4,SPHK1,ST6GAL1,STAT1,STIM…	78
Organismal Injury and Abnormalities	Organ Degeneration	1.03E-11	10.9872	1.88991e-11	10.7236	4.053	ACBD5,ADORA3,AFF1,AGTPBP1,AHR,APP,ARSG,CC2D2A,CCN3,CDC14A,CELF1,CELF2,CEP290,CFB,CHM,CLCN3,CLU,CRLF1,CX3CL1,DRAM2,DYNC2H1,DYSF,EDA,EDNRB,EPAS1,EPM2A,ERN1,FAM161A,FAM8A1,FLT1,FMC1-LUC7L2,FOLH1,FST,FZD4,GIGYF2,GMPPA,HDAC6,HERC2,HMCN1,HSPG2,IFT172,IL6,JMJD1C,KCNN3,KCNQ1,KDR,KIAA1549,KIT,LAMA4,LAMC1,LPIN1,MAPKAPK3,MARVELD2,MED12,MERTK,MGAT5B,MT-ND6,MT2A,MTHFD2,MTSS1,MYOF,NBAS,NR2C2,OFD1,OSTM1,PBX2,PD…	103
Developmental Disorder,Neurological Disease,Organismal Injury and Abnormalities	Congenital neurological disorder	1.72E-15	14.7645	4.03756e-15	14.3939	4.026	ABCA3,ABCB7,ABI1,ADARB1,ALDH2,ANO6,APAF1,APP,AR,ARFGEF2,ARID2,ARSL,ASL,ATP7A,ATP7B,AXIN2,BOC,BRCA2,CASK,CBL,CBLN1,CC2D2A,CCDC88C,CCL5,CDK5RAP2,CDKL5,CDON,CECR2,CEP120,CEP290,CEP295,CHD4,CHD7,CHN1,CHRNA7,CLU,CNTNAP1,COL7A1,DCC,DLGAP4,DYNC2H1,EDNRB,EFNB2,EP300,ERC1,F8,FANCB,FILIP1,FLT1,GHR,GMPPA,HDAC6,HEATR5B,HECW2,HEPH,HERC1,HIP1,HNRNPH1,HSPG2,IFT172,IL6,IRAK3,IRX5,ITGB4,JAM3,KCNJ12,KCNN3,KCNQ1,KD…	149
Gene Expression	Expression of RNA	2.51E-22	21.6003	7.65244e-22	21.1162	4.004	ACE,ACVR2A,ADAR,AFDN,AFF1,AHR,AMOT,APBA1,APP,AR,ARHGEF28,ARID2,ARID4A,ARRB1,ATF6B,ATF7,ATP2B4,ATP7A,BAZ2A,BCAS3,BCL9,BCOR,BMAL1,BMAL2,BMPR2,BMX,BRCA2,CAMKK2,CARF,CASK,CAVIN2,CCL5,CCN3,CD34,CD74,CDK5RAP2,CDK6,CDK7,CDON,CELF1,CEP290,CHD4,CHD6,CHD7,CHRNA7,CLOCK,CLU,CPEB3,CREBRF,CTDSPL,CX3CL1,DAB2,DACH1,DAXX,DROSHA,DYSF,E2F8,EBF1,EDA,EDNRB,EHMT2,EIF4G3,ELK4,EP300,EPAS1,EPB41L4B,EPHA4,EPM2A,ERC1,ERN1,…	285
Cellular Development,Cellular Growth and Proliferation,Hematological System Development and Function,Hematopoiesis,Lymphoid Tissue Structure and Development,Tissue Development	Differentiation of mononuclear leukocytes	5.88E-14	13.2306	1.26452e-13	12.8981	3.975	AFF1,AHR,APAF1,APP,ARID4A,ARRB1,ATP7A,BCL2L11,BCOR,BFAR,BMAL1,CBL,CCL23,CCL5,CCR7,CD74,CDK6,CHD4,CHD7,CLEC11A,CNOT3,CSF2RB,DGKA,DOCK8,DPP4,EBF1,EFNB2,ELK4,EP300,EPHA4,ERN1,ETS1,EZH2,FLI1,FLRT2,FLT1,FOXO1,FOXP1,FST,GAB2,GATA2,GMPR2,HDAC9,HGF,HLA-DRB1,IGF2R,IL18R1,IL24,IL6,IL7,INPP5D,IRAG2,IRAK3,ITPKB,JAK1,KDR,KIT,KMT2A,KMT2E,LAT,LCP1,LEF1,LTBP1,MCF2L,MERTK,MTOR,NCSTN,NF1,NFATC1,NOTCH1,PBX1,PHC1,PI…	114
Cellular Development,Cellular Growth and Proliferation,Hematological System Development and Function,Hematopoiesis,Lymphoid Tissue Structure and Development,Tissue Development	Development of mononuclear leukocytes	1.54E-13	12.8125	3.22176e-13	12.4919	3.952	AFF1,AHR,APAF1,APP,ARRB1,ATP7A,BCL2L11,BCOR,BFAR,BMAL1,CBL,CCL23,CCL5,CCR7,CD74,CDK6,CHD4,CHD7,CLEC11A,CNOT3,CSF2RB,DGKA,DOCK8,DPP4,EBF1,EFNB2,ELK4,EP300,EPHA4,ERN1,ETS1,EZH2,FLI1,FLRT2,FLT1,FOXM1,FOXO1,FOXP1,FST,GATA2,GMPR2,HDAC9,HGF,HLA-DRB1,IGF2R,IL18R1,IL24,IL6,IL7,INPP5D,IRAG2,IRAK3,ITPKB,JAK1,KDR,KIT,KMT2A,KMT2E,LAT,LCP1,LEF1,LTBP1,MCF2L,MERTK,MTOR,NCSTN,NF1,NFATC1,NOTCH1,PBX1,PHC1,PIK3CG,P…	113
Neurological Disease,Organismal Injury and Abnormalities	Early-onset neurological disorder	1.45E-16	15.8386	3.59801e-16	15.4439	3.915	ABCA3,ABCB7,ABI1,ADARB1,ADRA1D,AGTPBP1,ALDH2,ANO6,APAF1,APP,AR,ARFGEF2,ARID2,ARSL,ATP6V1A,ATP7A,ATP7B,BOC,BRCA2,CASK,CBL,CBLN1,CC2D2A,CCDC88C,CDK19,CDK5RAP2,CDKL5,CDON,CECR2,CELF2,CEP120,CEP290,CHD4,CHD7,CHRNA7,DCC,DENND5A,DLGAP4,DMXL2,EDNRB,EP300,EPM2A,ERC1,F8,FLT1,GABRP,HDAC6,HEATR5B,HECW2,HEPH,HERC1,HGF,HIP1,HNRNPH1,HSPG2,HTR1B,HTR1D,IFT172,IL6,IRX5,ITGA6,ITGB4,JAM3,JMJD1C,KALRN,KCNN3,KCNQ1,KD…	143
Cellular Development,Cellular Growth and Proliferation,Hematological System Development and Function,Hematopoiesis,Lymphoid Tissue Structure and Development,Tissue Development	Hematopoiesis of mononuclear leukocytes	2.43E-13	12.6144	5e-13	12.301	3.87	AFF1,AHR,APAF1,APP,ARRB1,ATP7A,BCL2L11,BCOR,BFAR,BMAL1,CBL,CCL23,CCL5,CCR7,CD74,CDK6,CHD4,CHD7,CLEC11A,CNOT3,CSF2RB,DGKA,DOCK8,DPP4,EBF1,EFNB2,ELK4,EP300,EPHA4,ERN1,ETS1,EZH2,FLI1,FLRT2,FLT1,FOXO1,FOXP1,FST,GATA2,GMPR2,HDAC9,HGF,HLA-DRB1,IGF2R,IL18R1,IL24,IL6,IL7,INPP5D,IRAG2,IRAK3,ITPKB,JAK1,KDR,KIT,KMT2A,KMT2E,LAT,LCP1,LEF1,LTBP1,MCF2L,MERTK,MTOR,NCSTN,NF1,NFATC1,NOTCH1,PBX1,PHC1,PIK3CG,PIK3R2,…	112
Cell-mediated Immune Response,Cellular Development,Cellular Function and Maintenance,Cellular Growth and Proliferation,Embryonic Development,Hematological System Development and Function,Hematopoiesis,Lymphoid Tissue Structure and Development,Organ Development,Organismal Development,Tissue Development	T cell development	1.37E-09	8.86328	2.01471e-09	8.69579	3.837	AFF1,AHR,APAF1,ARRB1,ATP7A,BCL2L11,BCOR,BFAR,CBL,CCL5,CCR7,CD74,CDK6,CHD4,CHD7,DGKA,EBF1,EFNB2,ELK4,EP300,EPHA4,ETS1,EZH2,FLI1,FLT1,FOXO1,FOXP1,GATA2,HLA-DRB1,IGF2R,IL18R1,IL6,IL7,IRAK3,ITPKB,JAK1,KDR,KIT,KMT2A,LAT,LEF1,LTBP1,MCF2L,MERTK,MTOR,NF1,NFATC1,NOTCH1,PIK3CG,PIK3R2,PLCG1,PPARG,PRDM1,PREX1,PRKCH,PRKCQ,PRKDC,PTPN11,REL,RNF157,RORA,RPTOR,SATB1,SFRP1,SH2B3,SHC1,STAT1,STAT2,STIM1,STING1,TGFBR…	82
Cellular Development,Cellular Growth and Proliferation,Embryonic Development,Hematological System Development and Function,Hematopoiesis,Lymphoid Tissue Structure and Development,Organ Development,Organismal Development,Tissue Development	Lymphopoiesis	1.27E-11	10.8962	2.3049e-11	10.6373	3.82	AFF1,AHR,APAF1,ARRB1,ATP7A,BCL2L11,BCOR,BFAR,BMAL1,CBL,CCL5,CCR7,CD74,CDK6,CHD4,CHD7,CLEC11A,CNOT3,DGKA,DOCK8,DPP4,EBF1,EFNB2,ELK4,EP300,EPHA4,ERN1,ETS1,EZH2,FLI1,FLT1,FOXO1,FOXP1,FST,GATA2,HDAC9,HLA-DRB1,IGF2R,IL18R1,IL24,IL6,IL7,INPP5D,IRAG2,IRAK3,ITPKB,JAK1,KDR,KIT,KMT2A,KMT2E,LAT,LCP1,LEF1,LTBP1,MCF2L,MERTK,MTOR,NCSTN,NF1,NFATC1,NOTCH1,PBX1,PHC1,PIK3CG,PIK3R2,PLCG1,PPARG,PRDM1,PREX1,PRKCH,PRK…	103
Behavior	Cognition	5.52E-08	7.25806	6.51712e-08	7.18594	3.817	ADRA1D,ADRA2A,AHR,APOD,APP,ARSG,CAMKK2,CARF,CDKL5,CHD7,CHRNA7,CPEB3,CRHBP,DCAF11,DOP1B,DSTYK,EHMT2,EP300,EPM2A,FOXO6,GATAD2B,GMPPA,HAPLN1,HDAC6,HTR1B,IGF2R,IL6,ITGA8,ITPR3,JPH4,KALRN,KCND1,KCNJ5,KIT,KMT2A,MBNL2,MTOR,NCDN,NF1,NIPBL,NOTCH1,NR3C2,NRP2,NTAN1,NTSR1,PAK3,PDE11A,PHF8,PJA2,PLCB1,POMC,PREX1,PRKAR2B,PRKN,RCAN2,REL,RPTOR,RXRB,SELENOP,SHANK3,SHROOM4,SLC12A5,SLC30A3,SORL1,SPG11,STAT1,STS,STX1…	74
Cellular Development,Cellular Growth and Proliferation,Hematological System Development and Function,Hematopoiesis,Lymphoid Tissue Structure and Development,Tissue Development	Leukopoiesis	6.29E-13	12.2013	1.23576e-12	11.9081	3.812	ADK,AFF1,AHR,AKAP13,ANKRD24,APAF1,APP,ARID4A,ARRB1,ATP7A,BCL2L11,BCOR,BFAR,BMAL1,CAST,CBL,CCL23,CCL5,CCR7,CD74,CDK6,CHD4,CHD7,CLEC11A,CNOT3,CSF2RB,CYSLTR1,DGKA,DOCK8,DPP4,EBF1,EFNB2,EIF6,ELK4,EP300,EPHA4,ERN1,ETS1,EZH2,FLI1,FLRT2,FLT1,FOXM1,FOXO1,FOXP1,FST,GAB2,GATA2,GMPR2,HDAC9,HGF,HLA-DRB1,IGF2R,IL18R1,IL24,IL6,IL7,INPP5D,IRAG2,IRAK3,ITPKB,JAK1,KDR,KIT,KLF12,KMT2A,KMT2E,LAT,LCP1,LEF1,LIFR,LTBP1…	129
Neurological Disease,Organismal Injury and Abnormalities	Early-onset encephalopathy	3.71E-16	15.4306	9.04878e-16	15.0434	3.789	ABCA3,ABCB7,ABI1,ADARB1,AGTPBP1,ALDH2,ANO6,APAF1,APP,AR,ARFGEF2,ARID2,ARSL,ATP6V1A,ATP7A,ATP7B,BOC,BRCA2,CASK,CBL,CBLN1,CC2D2A,CCDC88C,CDK19,CDK5RAP2,CDKL5,CDON,CECR2,CELF2,CEP120,CEP290,CHD4,CHD7,CHRNA7,DCC,DENND5A,DLGAP4,DMXL2,EP300,EPM2A,ERC1,F8,FLT1,HDAC6,HEATR5B,HECW2,HEPH,HERC1,HIP1,HNRNPH1,HSPG2,HTR1B,HTR1D,IFT172,IL6,IRX5,JAM3,JMJD1C,KALRN,KCNN3,KDM3B,KDR,KMT2A,KMT2C,KMT2E,LAMC1,LAMC3,LOC…	134
Developmental Disorder,Neurological Disease,Organismal Injury and Abnormalities	Congenital encephalopathy	2.92E-13	12.5346	5.94705e-13	12.2257	3.789	ABCA3,ABCB7,ABI1,ADARB1,ALDH2,ANO6,APAF1,APP,AR,ARFGEF2,ARID2,ARSL,ATP7A,ATP7B,BOC,BRCA2,CASK,CBLN1,CC2D2A,CCDC88C,CDK5RAP2,CDON,CECR2,CEP120,CEP290,CHD4,CHD7,CHRNA7,DCC,DLGAP4,EP300,ERC1,F8,FLT1,HDAC6,HEATR5B,HECW2,HEPH,HERC1,HIP1,HNRNPH1,HSPG2,IFT172,IL6,IRX5,JAM3,KCNN3,KDM3B,KDR,KMT2A,KMT2C,KMT2E,LAMC1,LAMC3,LOC128706665,MACF1,MBOAT7,MED12,MPDZ,MT-ND6,MTOR,MYO1C,NEDD4L,NF1,NFIA,NFIB,NID1,NOTCH…	108
Developmental Disorder,Neurological Disease,Organismal Injury and Abnormalities	Congenital anomaly of central nervous system	2.18E-10	9.66154	3.53896e-10	9.45112	3.789	ABCA3,ABCB7,ABI1,ANO6,APAF1,APP,ARFGEF2,ARID2,ARSL,BOC,BRCA2,CASK,CC2D2A,CCDC88C,CDK5RAP2,CDON,CECR2,CEP290,CHD4,DCC,DLGAP4,EP300,ERC1,FANCB,HDAC6,HEATR5B,HECW2,HEPH,HERC1,HIP1,HSPG2,IFT172,LAMC1,LAMC3,MACF1,MBOAT7,MPDZ,MTOR,MYO1C,NEDD4L,NF1,NFIA,NFIB,NID1,NOTCH1,NSD1,OFD1,PCDH12,PCDH19,PIK3R2,PMM1,PPARG,PRKACB,RERE,RTTN,RXRB,SETD2,SPHK1,SPTA1,STAT2,TFAP2A,TSC1,TUBB,UTRN,VWF,WFS1	66
Developmental Disorder,Gastrointestinal Disease,Organismal Injury and Abnormalities	Congenital anomaly of mouth	4.23E-09	8.37366	5.7551e-09	8.23995	3.734	ABR,ACVR2A,ADAMTS9,ADRA1D,ADRA2A,AHR,APAF1,AXIN2,BCAS3,BMPR2,BOC,CAST,CDON,CECR2,CHM,CMKLR1,CNOT3,COL7A1,CSGALNACT1,EDA,EDNRB,EP300,ERC1,ETS1,FILIP1,FNBP1L,FOCAD,FOXP1,FST,GLCE,GPC5,HAPLN1,HERC1,HLA-DPB1,HSPG2,IFT172,INHBB,IRF6,IRX5,JARID2,KCNN3,KDM3B,KMT2E,LEF1,MED12,MGAT4A,MMP16,MTOR,MYO6,NF1,NFIB,NIPBL,NSD1,OFD1,PAPOLG,PBX1,PBX2,PER3,PHC1,PIK3C2A,PRKN,PTPN11,RASAL2,RASGRF2,RIPK4,RPS6KC1,SCNN1B…	83
Neurological Disease,Organismal Injury and Abnormalities	Abnormal morphology of nervous system	5.78E-09	8.23807	7.6964e-09	8.11371	3.68	ABR,ADGRA2,AFDN,APAF1,APP,AR,ARFGEF2,ARSG,ATL1,BCL2L11,BRCA2,CAMKK2,CAST,CBLN1,CCL5,CDC14A,CDK5RAP2,CDON,CEP290,CFAP206,CHM,CHN1,CLCN3,CLIP3,CNTNAP1,CPEB3,CPEB4,CX3CL1,DCC,EBF1,EFHC1,EPAS1,EPHA4,EPM2A,EPS15,ETV1,FLI1,FOLH1,FST,GMPPA,GUCY1A1,HEY2,HSPG2,IFT172,IL6,IRX5,ITGA6,KALRN,KCNQ1,LAMA4,LAMB2,LAMC1,LEF1,LHX6,LIFR,MAP3K1,MBNL1,MBNL2,MBOAT7,MECOM,MERTK,MT-ND6,MT2A,MTOR,MYCBP2,NCAM2,NF1,NFIA,NFI…	111
Developmental Disorder,Neurological Disease,Organismal Injury and Abnormalities	Congenital malformation of brain	7.49E-10	9.12552	1.14701e-09	8.94043	3.675	ABCA3,ABCB7,ABI1,ANO6,APAF1,APP,ARFGEF2,ARID2,ARSL,BOC,BRCA2,CASK,CC2D2A,CCDC88C,CDK5RAP2,CDON,CECR2,CEP290,CHD4,DCC,DLGAP4,EP300,ERC1,HDAC6,HEATR5B,HECW2,HEPH,HERC1,HIP1,HSPG2,IFT172,LAMC1,LAMC3,MACF1,MBOAT7,MPDZ,MTOR,MYO1C,NEDD4L,NF1,NFIA,NFIB,NID1,NOTCH1,NSD1,OFD1,PCDH12,PCDH19,PIK3R2,PMM1,PPARG,PRKACB,RERE,RTTN,SETD2,SPHK1,SPTA1,STAT2,TFAP2A,TSC1,TUBB,UTRN,VWF,WFS1	64
Gene Expression	Activation of DNA endogenous promoter	2.74E-17	16.5622	7.11688e-17	16.1477	3.659	ACVR2A,AHR,AMOT,APP,AR,ARID2,ARID4A,ARRB1,ATF6B,ATF7,ATP2B4,BCAS3,BCL9,BCOR,BMAL1,BMAL2,BMPR2,CARF,CASK,CAVIN2,CDK6,CDK7,CDON,CHD4,CHD6,CHD7,CLOCK,CPEB3,CREBRF,CX3CL1,DAB2,DACH1,DAXX,E2F8,EBF1,EDNRB,EHMT2,ELK4,EP300,EPAS1,ETS1,ETV1,EZH2,FLI1,FOXD1,FOXJ3,FOXM1,FOXO1,FOXO6,FOXP1,FST,FZD4,GATA2,GPER1,GTF2H4,GTF2I,HBP1,HDAC9,HEY2,HIF3A,HIPK3,HIVEP1,HSPA1A,IFT172,IL6,IRF6,IRX5,ITGA6,ITGA8,JARID2,JMY,J…	169
Organismal Injury and Abnormalities	Extraintestinal functional disorder	1.83E-13	12.7375	3.79668e-13	12.4206	3.623	ABI1,ACACA,ACBD4,ACKR3,ACVR2A,ADARB1,ADCK1,ADGRF5,ADORA3,ADRA1D,ADRA2A,ALDH2,ANO6,AR,ARHGEF28,ARRB1,ATP1A1,BAZ2B,BCAS3,BMAL1,C2CD2,CALCRL,CARF,CCL5,CEP120,CHD7,CHRNA7,CIT,CLEC16A,CLU,CMKLR1,CRAMP1,CSGALNACT1,CUL9,CX3CL1,CYSLTR1,DACH1,DCC,DDX39B,DROSHA,EBF1,ECPAS,EHMT2,EML4,EP300,EPAS1,EPB41L4A,FAM120B,FAT4,FCHSD2,FOXP1,FST,GABRP,GHR,GIGYF2,GPC5,GPER1,HDAC9,HEY2,HLA-C,HLA-DRB1,HTR1B,HTR1D,IGF2R,IL…	174
Behavior	Learning	7.94E-08	7.10018	9.22184e-08	7.03518	3.605	ADRA1D,ADRA2A,AHR,APOD,APP,ARSG,CAMKK2,CARF,CDKL5,CHRNA7,CPEB3,CRHBP,DCAF11,DSTYK,EHMT2,EP300,EPM2A,FOXO6,GATAD2B,HAPLN1,HDAC6,HTR1B,IGF2R,IL6,ITGA8,ITPR3,JPH4,KALRN,KCNJ5,KIT,KMT2A,MBNL2,MTOR,NCDN,NF1,NOTCH1,NR3C2,NRP2,NTAN1,NTSR1,PAK3,PDE11A,PHF8,PJA2,PLCB1,POMC,PREX1,PRKAR2B,PRKN,RCAN2,REL,RPTOR,RXRB,SELENOP,SHANK3,SLC12A5,SLC30A3,SORL1,SPG11,STAT1,STS,STX1A,TANC1,TGFBR2,TNC,TSC1,UBE3A,WFS1	68
Neurological Disease,Organismal Injury and Abnormalities	Movement disorders	8.02E-12	11.0958	1.48244e-11	10.829	3.599	ABCB7,ACKR3,ADORA3,ADRA1D,ADRA2A,AFF1,AHR,ALDH2,ANKHD1-EIF4EBP3,APBA1,APOD,APP,AR,ARFGEF3,ARHGAP27,ARRB1,ASAP1,ATL1,ATP11A,ATP6V1A,ATP7B,ATR,BAZ2B,BEND4,BMAL1,CAMKK2,CBL,CBLN1,CC2D2A,CCDC88C,CCL5,CD74,CDKL5,CELF2,CEP290,CHN1,CHRNA7,CIT,CLCN3,CLU,CMKLR1,CNTNAP1,CORO2B,CRIM1,CX3CL1,DCC,DNALI1,DPP4,DUSP14,EFHC1,EFR3A,EP300,EPHA4,EPM2A,ETV1,FILIP1,FLRT2,FLT1,FOXN3,FOXP1,FST,FZD4,GABRP,GIGYF2,GPER1,GP…	209
Connective Tissue Disorders,Developmental Disorder,Gastrointestinal Disease,Organismal Injury and Abnormalities,Skeletal and Muscular Disorders	Orofacial dysmorphism	1.76E-07	6.75449	1.94906e-07	6.71018	3.596	ABR,ACVR2A,ADAMTS9,ADRA1D,ADRA2A,AHR,APAF1,BCAS3,BOC,CAST,CDON,CECR2,CHM,CMKLR1,CNOT3,CSGALNACT1,EDNRB,EP300,ERC1,ETS1,FILIP1,FNBP1L,FOCAD,FST,GLCE,GPC5,HAPLN1,HERC1,HLA-DPB1,HSPG2,IFT172,IRF6,IRX5,JARID2,KCNN3,KDM3B,KMT2E,MED12,MGAT4A,MMP16,MTOR,MYO6,NF1,NFIB,NIPBL,NSD1,OFD1,PBX1,PBX2,PER3,PHC1,PRKN,PTPN11,RASAL2,RASGRF2,RIPK4,RPS6KC1,SCNN1B,SDC2,SDCCAG8,SEMA6A,SMAD4,SPATA13,SPECC1L,TBC1D32,TFAP…	72
Developmental Disorder,Gastrointestinal Disease,Organismal Injury and Abnormalities	Congenital anomaly of gastrointestinal tract	3.59E-09	8.44491	4.9723e-09	8.30344	3.57	ABR,ACVR2A,ADAMTS9,ADRA1D,ADRA2A,AHR,APAF1,AXIN2,BCAS3,BMPR2,BOC,CAST,CDON,CECR2,CHM,CMKLR1,CNOT3,COL7A1,CSGALNACT1,EDA,EDNRB,EIF6,EP300,ERC1,ETS1,FILIP1,FNBP1L,FOCAD,FOXP1,FST,GLCE,GPC5,HAPLN1,HERC1,HLA-DPB1,HSPG2,IFT172,INHBB,IRF6,IRX5,JARID2,KCNN3,KDM3B,KMT2E,LEF1,MED12,MGAT4A,MMP16,MTOR,MYO6,NF1,NFIB,NIPBL,NSD1,OFD1,PAPOLG,PBX1,PBX2,PER3,PHC1,PIK3C2A,PRKN,PTPN11,RASAL2,RASGRF2,RIPK4,RPS6KC1,S…	86
Cell Morphology,Cellular Assembly and Organization,Cellular Development,Cellular Function and Maintenance,Cellular Growth and Proliferation,Nervous System Development and Function,Organismal Development,Tissue Development	Neuritogenesis	4.18E-17	16.3788	1.07179e-16	15.9699	3.556	ABI1,ACVR2A,AFDN,AGTPBP1,AHR,AMIGO3,APBA1,APP,AR,ARFGEF1,ARHGEF28,ASAP1,ATL1,ATP7A,ATP9A,BOC,BTBD3,CAMKK2,CASK,CDKL5,CHN1,CIB1,CIT,CLU,CNTNAP1,CPEB3,CRIP1,CX3CL1,DAB2,DCC,DENND5A,EFNB2,EIF4G3,EP300,EPHA4,EZH2,FBXO38,FNBP1L,FOXO6,FZD4,GPRIN3,HDAC6,HDAC9,HERC1,HGF,IL6,IQGAP1,IQSEC1,ITGA1,ITGA6,ITSN2,JMY,KALRN,KAT2B,KDR,KIF13B,KIF20B,LAMB2,LAMC1,LIFR,LONRF2,MPDZ,MRTFB,MT2A,MTOR,MTSS1,MYO6,NCAM2,NCDN…	127
Cell Morphology,Cellular Development,Cellular Growth and Proliferation,Nervous System Development and Function,Organismal Development,Tissue Development	Morphogenesis of neurons	4.47E-17	16.3497	1.1374e-16	15.9441	3.556	ABI1,ACVR2A,AFDN,AGTPBP1,AHR,AMIGO3,APBA1,APP,AR,ARFGEF1,ARHGEF28,ASAP1,ATL1,ATP7A,ATP9A,BOC,BTBD3,CAMKK2,CASK,CDKL5,CHN1,CIB1,CIT,CLU,CNTNAP1,CPEB3,CRIP1,CX3CL1,DAB2,DCC,DENND5A,EFNB2,EIF4G3,EP300,EPHA4,EZH2,FBXO38,FNBP1L,FOXO6,FZD4,GPRIN3,HDAC6,HDAC9,HERC1,HGF,IL6,IQGAP1,IQSEC1,ITGA1,ITGA6,ITSN2,JMY,KALRN,KAT2B,KDR,KIF13B,KIF20B,LAMB2,LAMC1,LIFR,LONRF2,MPDZ,MRTFB,MT2A,MTOR,MTSS1,MYCBP2,MYO6,NCA…	128
Embryonic Development,Organismal Development	Development of body axis	4.68E-19	18.3298	1.31092e-18	17.8824	3.488	AASS,ABCG2,ABR,ACVR2A,ADCK1,ADGRA2,AFDN,AGTPBP1,AHR,APAF1,APP,ARHGEF12,ATAT1,ATP7A,AXIN2,BCL2L11,BCL9,BCOR,BMPR2,BOC,BRCA2,BTBD3,CAMKK2,CC2D2A,CCDC150,CD34,CD93,CDK5RAP2,CDK6,CDON,CECR2,CELF1,CEP120,CEP290,CHD7,CLU,COL7A1,CSGALNACT1,CX3CL1,DCHS1,DLGAP4,DMXL2,DYNC2H1,EBF1,EDA,EP300,EPHA4,EZH2,FAT4,FILIP1,FOXD1,FOXO1,FRAS1,FRS2,FST,FYCO1,FZD4,GABRP,GATA2,GATAD2B,GHR,GMPPA,HDAC6,HERC1,HEY2,HGF,HIF3A…	175
Embryonic Development,Organismal Development	Development of head	1.70E-18	17.7696	4.61957e-18	17.3354	3.488	AASS,ABCG2,ABR,ACVR2A,ADCK1,ADGRA2,AFDN,AGTPBP1,AHR,APAF1,APP,ARHGEF12,ATAT1,ATP7A,AXIN2,BCL2L11,BCL9,BCOR,BMPR2,BOC,BRCA2,BTBD3,CAMKK2,CC2D2A,CCDC150,CD34,CD93,CDK5RAP2,CDK6,CDON,CECR2,CELF1,CEP120,CEP290,CHD7,CLU,COL7A1,CSGALNACT1,CX3CL1,DCHS1,DLGAP4,DMXL2,DYNC2H1,EBF1,EDA,EP300,EPHA4,EZH2,FAT4,FILIP1,FOXD1,FOXO1,FRAS1,FRS2,FST,FYCO1,FZD4,GABRP,GATA2,GATAD2B,GHR,GMPPA,HDAC6,HERC1,HEY2,HGF,HIF3A…	167
Metabolic Disease,Organismal Injury and Abnormalities	Glucose metabolism disorder	5.44E-21	20.2644	1.6e-20	19.7959	3.47	ABCC1,ABCG2,ACACA,ACBD4,ACE,ACER2,ADAMTS9,ADARB1,ADCY9,ADK,ADRA1D,ADRA2A,AFF1,AHNAK2,AHR,ALDH2,ANKRD28,ANKS1A,ANO6,APCDD1,APOD,APOLD1,APP,AR,ARFGEF3,ARHGEF6,ARID2,ARID4A,ARSG,ASAP1,ASL,ATP10A,ATP11A,ATP1A1,ATP2B4,ATP6V1G2,ATP7B,BACE2,BCL2L11,BDH1,BEND4,BIRC6,BMAL1,BMPR2,BOC,BRCA2,C1QL3,CALCRL,CAMKK2,CAND2,CAST,CAVIN2,CCDC144A,CCDC80,CCDC88C,CCL5,CCNB1IP1,CCR7,CD34,CD74,CD93,CDC42BPA,CDK6,CDS2,CEC…	391
Cellular Movement,Hematological System Development and Function,Immune Cell Trafficking,Inflammatory Response	Cell movement of phagocytes	9.08E-08	7.04191	1.0485e-07	6.97943	3.41	ABCC1,ADORA3,ANO6,APP,AR,ARRB1,BMPR2,C1QL3,CAST,CCL23,CCL5,CCN3,CCR7,CD177,CD74,CFB,CLEC11A,CMKLR1,CSF2RB,CX3CL1,DGKA,DOCK8,DPP4,DYSF,EDNRB,EPAS1,ERN1,FAM171B,FLRT2,FLT1,FOXO6,GATA2,HGF,IFIH1,IL24,IL6,INPP5D,IRAK3,IRF6,ITGA1,ITGA6,ITGAX,JAK1,JAM3,KDR,KIT,MERTK,NF1,NOTCH1,NPR1,NR3C2,NRP2,PARG,PFKFB3,PIK3CG,PLD1,PLXNB1,PLXND1,PPARG,PRDM1,PREX1,PRKCQ,PSMB8,PTGDR2,PTPN11,PTPRB,REL,RGS5,RORA,RPTOR,SFR…	89
Cell Morphology,Cellular Development	Branching of cells	2.81E-09	8.55129	3.94109e-09	8.40438	3.404	ABI1,AFDN,AHR,APBA1,APP,ASAP1,CAMKK2,CASK,CDKL5,CHN1,CPEB3,CRIP1,DCC,DROSHA,EFNB2,EIF4G3,EPHA4,ETS1,FNBP1L,FOXO6,GPRIN3,HDAC6,HDAC9,HGF,IL6,IQSEC1,ITGA2,ITSN2,KALRN,KDR,KIF13B,KMT2A,LAMA4,LIFR,MT2A,MTOR,MTSS1,NCAM2,NEDD4L,NF1,NOTCH1,NRP2,NUAK1,PAK3,PALD1,PALM,PAM,PKP4,PLD1,PRKN,PTPN11,RAPH1,RNF157,ROCK2,SDC2,SEMA6A,SHANK3,SLC12A5,SLC23A2,SMAD1,SMAD4,SYT1,TEK,TMOD1,TNC,TSC1,UBE3A,VIP,ZDHHC15,ZMYND8	70
Organismal Injury and Abnormalities,Skeletal and Muscular Disorders	Limb defect	1.75E-07	6.75696	1.94013e-07	6.71217	3.403	ADAMTS9,ADRA1D,ADRA2A,ATL1,BRCA2,CASK,CCN3,CEP120,COL7A1,COL9A3,CRIM1,CSGALNACT1,DACH1,DSTYK,DYNC2H1,FLNB,FRAS1,FST,GHR,GLCE,GPER1,HDAC6,HSPG2,IFT172,IGF2R,INPP5D,IRF6,ITGA6,KIF24,KMT2E,LEF1,MAMLD1,MECOM,MED12,MED23,MMP16,MYO1D,NIPBL,NPFFR2,NPR3,OFD1,PRKACB,PRKN,RIPK4,RP1L1,SCARF2,SDCCAG8,SFRP1,SMAD1,SMAD4,STAT1,TBC1D32,TFAP2A,TGFBR3,TOP2B,TRPS1,VCAN,WWP2,ZBTB16	59
Neurological Disease,Organismal Injury and Abnormalities	Sensory loss	1.25E-09	8.90309	1.84638e-09	8.73368	3.391	ABCC1,ABI1,ADK,ANKRD36,ARHGEF28,ARSG,ATP11A,CCL5,CCR7,CDC14A,CFB,CHD7,CHM,CLCN3,COL9A3,DMXL2,DPP4,EDNRB,EML6,FMC1-LUC7L2,FST,FZD4,HDAC6,HGF,IL6,IL7,IQGAP2,ITGB4,JMY,KCNQ1,KIT,LOC127814297,LRBA,MARVELD2,MAST2,MED12,MERTK,MPDZ,MT-CO1,MT-ND6,MTOR,MYO1C,MYO1D,MYO6,NAPEPLD,OTOGL,PBX1,PDE11A,PDE9A,PIK3R3,PRR14L,RDX,RERE,REST,RPTOR,SLC12A7,SLC44A4,SMAD4,SPTBN1,TCF19,THSD7A,TJP2,TLR1,TLR6,TMTC2,TNC,TRMU,…	71
Organismal Injury and Abnormalities	Abnormal morphology of thorax	4.93E-19	18.3072	1.37709e-18	17.861	3.375	ABCC1,ABI1,ACE,ACKR3,ADAMTS9,ADAR,ADGRF5,ADK,ADORA3,ADRA1D,ADRA2A,AFDN,AHR,AKAP13,AKAP9,ARHGEF12,ARRB1,ATAT1,ATE1,BCAS3,BMAL1,BMPR2,BMX,BRCA2,CALCRL,CAST,CBL,CCN3,CCR7,CDK6,CDK7,CDS2,CHD7,CIB1,CLU,CMKLR1,CNOT3,CSDE1,CSF2RB,CYP1A1,DCHS1,DDIAS,DGKA,DPP4,DYSF,EFNB2,EP300,EPAS1,EPM2A,ETS1,FAM120B,FAT4,FLNB,FLRT2,FLT1,FOXM1,FOXO1,FOXP1,FRRS1,FST,GATA2,GLCE,GPER1,GUCY1A1,HDAC9,HEY2,HGF,HIF3A,HSPG2,HTR1…	158
Organismal Injury and Abnormalities	Abnormal morphology of thoracic cavity	1.30E-18	17.8861	3.56164e-18	17.4483	3.375	ABCC1,ABI1,ACE,ACKR3,ADAMTS9,ADAR,ADGRF5,ADK,ADORA3,ADRA1D,ADRA2A,AFDN,AHR,AKAP13,AKAP9,ARHGEF12,ARRB1,ATAT1,ATE1,BCAS3,BMPR2,BMX,CALCRL,CAST,CBL,CCN3,CCR7,CDK6,CDK7,CDS2,CHD7,CIB1,CLU,CMKLR1,CNOT3,CSDE1,CSF2RB,CYP1A1,DCHS1,DDIAS,DGKA,DPP4,DYSF,EFNB2,EP300,EPAS1,EPM2A,ETS1,FAM120B,FAT4,FLRT2,FLT1,FOXM1,FOXO1,FOXP1,FRRS1,GATA2,GLCE,GPER1,GUCY1A1,HDAC9,HEY2,HGF,HIF3A,HSPG2,HTR1B,IER3,IGF2R,IL6,IL7,…	153
Cardiovascular System Development and Function,Cellular Movement	Movement of vascular endothelial cells	6.61E-08	7.1798	7.76733e-08	7.10973	3.373	ACACA,ACKR3,ARFGEF1,ARFGEF2,ARHGEF6,ATP7A,BMPR2,CAVIN2,DGKA,EFNB2,FLNB,FLT1,FOXO1,FRS2,HGF,HSPG2,IL24,IQGAP1,ITGA2,ITGB4,KDM2B,KDR,KMT2A,MTSS1,PIK3C2A,PIK3C2B,PIK3CG,PLPP3,PLXND1,PRKD2,PTPN11,RCAN2,STAB2,TGFBR2,THSD7A,TJP1,VAV3,VWF	38
Developmental Disorder,Hereditary Disorder,Organismal Injury and Abnormalities	Familial congenital malformation	6.77E-22	21.1694	2.02695e-21	20.6932	3.346	ABCA3,ABCB7,ABI1,ACE,ACVR2A,ADAMTS10,ADARB1,AKAP9,ALDH2,ANO6,APP,AR,ARFGEF2,ARID2,ARSL,ASL,ATE1,ATP6V1A,ATP7A,ATP9A,ATR,AXIN2,BCL9,BCOR,BMPR2,BRCA2,CALCRL,CASK,CBL,CBLN1,CC2D2A,CCDC88C,CCL5,CDK5RAP2,CDK6,CDON,CEP120,CEP290,CEP295,CHD4,CHD7,CHN1,CHRNA7,CIT,CLU,CNOT3,CNTNAP1,COL7A1,COL9A3,DCC,DCHS1,DOCK6,DSTYK,DYNC2H1,EDA,EDNRB,EOGT,EP300,EPAS1,ERC1,ETS1,EXOC6B,EZH2,F8,FANCB,FAT4,FBXW11,FILIP1,FLNB…	238
Cancer,Organismal Injury and Abnormalities	Subcutaneous tumor	3.27E-11	10.4855	5.73684e-11	10.2413	3.342	ACACA,ADAR,ADARB1,AGTPBP1,AHR,APOLD1,AR,ARFGEF2,ARSL,ASL,BDH1,CALCRL,CAVIN2,CBL,CCNB1IP1,CD109,CD34,CDK5RAP2,CELF2,CFB,CLEC16A,CNOT3,COL7A1,CRIM1,CRIP1,DLGAP4,DOP1A,DOP1B,EDNRB,EP300,EPAS1,EZH2,FAM171B,FLI1,FOXD1,FOXO1,FOXP1,GATA2,GUCY1A1,HBP1,HEATR5B,IFIH1,IGFBP5,IL6,IQGAP1,IRAG1,JAM3,JPH4,KCNN3,KCTD12,KIF20B,KIT,KLF11,KLF12,KMT2C,LAMB2,LDLRAD4,LIFR,LPIN1,LTBP1,MARCHF8,MBOAT7,MED12,MEGF9,MT-CO2,…	115
Cellular Development,Cellular Growth and Proliferation	Proliferation of blood cells	3.21E-13	12.4935	6.51116e-13	12.1863	3.33	ABI1,ACE,ADK,AHR,AKAP13,ANO6,ARHGEF6,ATF6B,B3GNT5,BCL2L11,BCOR,BRCA2,CBL,CCL23,CCL5,CCR7,CD34,CD74,CDK6,CFB,CHD4,CLEC11A,CLU,CSF2RB,CX3CL1,CYSLTR1,DAB2,DGKA,DOCK8,DPP4,DUSP14,EBF1,EFNB2,EP300,EPAS1,ETS1,EZH2,FLI1,FOXO1,FOXP1,GAB2,GATA2,HGF,HLA-DPB1,HLA-DRB1,HSPA1A,IDE,IL24,IL6,IL7,INPP5D,IQGAP1,IRF6,ITGA2,ITGA2B,ITGAX,ITPKB,ITPR3,JAK1,JMJD1C,KDR,KIT,KMT2A,LAT,LCP1,LEF1,LPIN1,LTBP1,MAP2K6,MAP3K1,M…	130
Organismal Injury and Abnormalities	Abnormal morphology of mediastinum	1.36E-17	16.8665	3.56955e-17	16.4474	3.329	ABCC1,ABI1,ACE,ACKR3,ADAMTS9,ADAR,ADK,ADORA3,ADRA1D,ADRA2A,AFDN,AHR,AKAP13,AKAP9,ARHGEF12,ATAT1,ATE1,BCAS3,BMPR2,BMX,CALCRL,CAST,CBL,CCN3,CCR7,CDK6,CDK7,CDS2,CHD7,CIB1,CLU,CMKLR1,CNOT3,CSDE1,CYP1A1,DCHS1,DDIAS,DPP4,DYSF,EFNB2,EP300,EPAS1,EPM2A,ETS1,FAM120B,FAT4,FLRT2,FLT1,FOXM1,FOXO1,FOXP1,FRRS1,GATA2,GPER1,GUCY1A1,HDAC9,HEY2,HGF,HIF3A,HSPG2,HTR1B,IER3,IGF2R,IL6,IL7,ITPKB,JAK1,JARID2,JPH2,KCNQ1,K…	140
Nervous System Development and Function	Sensory system development	8.09E-08	7.09205	9.38515e-08	7.02756	3.315	AFDN,AGTPBP1,APAF1,APP,ATP7A,BCL2L11,BCL9,BMPR2,BOC,CHD7,CHM,CLCN3,COL7A1,DOCK8,EBF1,FOXD1,FRS2,FST,FYCO1,FZD4,GUCY1A1,HDAC6,HEY2,HGF,HIF3A,HPS3,HPS5,HSPG2,IL6,INHBB,IRX5,ITGA6,JAM3,KDR,LAMB2,LEF1,MAP3K1,NF1,NIPBL,NOTCH1,PDE6B,PHC1,PIK3R2,PRDM1,PSMB8,PTPN11,PXDN,RP1L1,RXRB,SEMA6A,SHROOM2,SHROOM4,SP1,SPEN,SPRY1,SPTBN1,TBC1D32,TFAP2A,TNFRSF12A,VIM	60
Cardiovascular Disease,Organismal Injury and Abnormalities	Abnormality of heart ventricle	1.03E-09	8.98716	1.53961e-09	8.81259	3.306	ACE,ACKR3,ADORA3,ADRA1D,ADRA2A,APOD,ATAT1,BMPR2,BMX,CAST,CBL,CCN3,CCR7,CDK6,CDK7,CEP192,CHD4,CLU,CSDE1,DCHS1,DPP4,DYSF,EP300,EPAS1,ETS1,FLT1,FOXM1,FOXO1,FOXP1,GABRP,GLCE,GUCY1A1,HAPLN1,HDAC9,HEY2,HGF,HIF3A,HSPA1A,HSPG2,IER3,IGF2R,IL6,ITGA2B,ITGB4,ITGBL1,JPH2,KDR,KRT7,LAMA4,MAP3K1,MBNL1,MBNL2,MECOM,MRTFB,MT-CO1,MT-CO2,MTOR,NF1,NFATC1,NOTCH1,NPR1,NR3C2,OAS3,PBX1,PBX2,PDE11A,PDE4C,PDE7B,PDE9A,PHC1,P…	96
Cardiovascular System Development and Function,Organismal Development,Tissue Development	Development of cardiovascular tissue	8.79E-11	10.056	1.51031e-10	9.82093	3.292	ALDH2,APP,BMPR2,CALCRL,CAVIN2,CBL,CCR7,CD34,DAB2,DGKA,DYSF,EDNRB,EFNB2,ERN1,FLI1,FLT1,FOXM1,FOXO1,FOXP1,FRS2,HGF,HSPG2,IL24,IL6,IQGAP1,ITGA1,ITGA2,ITGAX,KDR,KIT,MAGI1,MAP2K6,MERTK,MTOR,MYOF,NCOA3,NF1,NOTCH1,NRP2,PFKFB3,PIK3C2A,PIK3C2B,PIK3CG,PLCG1,PLD1,PPARG,PPP1R16B,PRKD2,PRKDC,PTPRM,RCAN2,RGS5,RPTOR,SEMA6A,SLC38A5,SMAD4,SP1,SPEN,STAT1,STC1,TEK,TFAP2A,TGFBR2,TMOD1,TNFRSF12A,VIP,WWP2,WWTR1	68
Cell Morphology	Sprouting	1.18E-09	8.92812	1.75334e-09	8.75613	3.241	ABI1,ADGRA2,AFDN,APBA1,APP,ASAP1,BCAS3,CAMKK2,CASK,CDKL5,CHN1,CPEB3,CRIP1,DCC,DROSHA,EFNB2,EIF4G3,EPHA4,ETS1,FNBP1L,FOXO6,GPRIN3,HDAC6,HDAC9,HGF,HSPG2,IL6,IQSEC1,ITSN2,KALRN,KDR,KIF13B,KMT2A,LAMA4,LIFR,MT2A,MTOR,MTSS1,NCAM2,NEDD4L,NF1,NOTCH1,NRP2,NUAK1,PAK3,PALD1,PALM,PKP4,PLD1,PRKN,RAPH1,RNF157,ROCK2,SDC2,SEMA6A,SHANK3,SHROOM2,SLC12A5,SLC23A2,SMAD1,SMAD4,SYT1,TEK,TGFBR2,THSD7A,TMOD1,TNC,TSC1,UBE…	74
Cancer,Organismal Injury and Abnormalities	Advanced malignant tumor	3.45E-17	16.4622	8.89175e-17	16.051	3.237	ABR,ACKR3,ADAR,ADGRA2,ADGRF5,ADORA3,ADRA1D,ADRA2A,AFAP1L1,AFDN,AMOT,AR,ARFGEF2,ARID2,ASAP1,ASL,ATP7A,ATP9A,ATR,AXIN2,BCL2L11,BCL9,BCOR,BMPR2,BRCA2,CAVIN2,CBL,CCDC80,CCL5,CCN3,CCR7,CD74,CDK6,CHD4,CLCN3,CLU,CNOT3,COL9A3,CRYBG1,CSF2RB,DAB2,DACH1,DAXX,DCC,DGKA,DPP4,DROSHA,EDNRB,EFNB2,ELK4,EP300,EPAS1,EPB41L4B,ETS1,ETV1,EXOC6B,EZH2,FAM120B,FANCM,FBXL7,FLRT2,FLT1,FNBP1L,FOLH1,FOXD1,FOXM1,FOXO1,FOXP1,FR…	212
Cancer,Organismal Injury and Abnormalities	Metastasis	2.32E-15	14.6345	5.42056e-15	14.266	3.212	ABR,ACKR3,ADAR,ADGRA2,ADGRF5,ADORA3,ADRA1D,ADRA2A,AFAP1L1,AFDN,AMOT,AR,ARFGEF2,ARID2,ASAP1,ASL,ATP7A,ATP9A,ATR,AXIN2,BCL2L11,BCL9,BCOR,BMPR2,BRCA2,CAVIN2,CBL,CCDC80,CCL5,CCN3,CCR7,CDK6,CHD4,CLCN3,CLU,CNOT3,COL9A3,CRYBG1,CSF2RB,DAXX,DCC,DGKA,DROSHA,EDNRB,EFNB2,ELK4,EP300,EPAS1,EPB41L4B,ETS1,ETV1,EXOC6B,EZH2,FAM120B,FANCM,FBXL7,FLRT2,FLT1,FNBP1L,FOLH1,FOXD1,FOXM1,FOXP1,FRS2,FST,GABRP,GATA2,GEN1,GPE…	198
Cardiovascular Disease,Organismal Injury and Abnormalities	Abnormal morphology of cardiovascular system	2.35E-19	18.6289	6.65722e-19	18.1767	3.209	ABCC1,ABI1,ACE,ACKR3,ADAMTS9,ADAR,ADGRA2,ADK,ADORA3,ADRA1D,ADRA2A,AFDN,AHR,AKAP13,AKAP9,AMOT,ARHGEF12,ARID4A,ARSG,ATAT1,ATE1,BCAS3,BMPR2,BMX,CALCRL,CAST,CCN3,CDK6,CDK7,CDON,CDS2,CHD7,CIB1,CLU,CMKLR1,CNOT3,CSDE1,DCHS1,DDIAS,DPP4,DYSF,E2F8,EDNRB,EFNB2,EP300,EPAS1,EPM2A,ETS1,FAM120B,FAT4,FLRT2,FLT1,FOLH1,FOXM1,FOXO1,FOXP1,FRRS1,GATA2,GHR,GPER1,GUCY1A1,HDAC9,HEY2,HGF,HIF3A,HSPG2,HTR1B,IER3,IGF2R,IL6,…	149
Cell Death and Survival	Cell viability of blood cells	2.23E-10	9.6517	3.60258e-10	9.44339	3.189	ACKR3,APP,ARRB1,BCL2L11,CBL,CCR7,CD74,CHD4,CLEC11A,CLOCK,CLU,CSF2RB,CX3CL1,DOCK8,EBF1,ERN1,FCMR,FOXO1,FOXP1,GAB2,GATA2,HGF,IL6,IL7,INPP5D,ITPKB,ITPR3,JAK1,KDR,KIT,LAT,LEF1,MCF2L,MTOR,NF1,NOTCH1,PARP14,PIK3CG,PLXNB1,PRDM1,PRKCQ,PTPN11,REL,RPTOR,SMAD4,STAT1,TNFSF9,TSC1,TSC22D3,VIP	50
Cancer,Organismal Injury and Abnormalities	Growth of solid tumor	1.83E-09	8.73755	2.63689e-09	8.57891	3.183	ABCG2,ACACA,ADAR,AGTPBP1,AHR,APCDD1,AR,ARID2,ASL,ATP7A,BCL9,BRCA2,CC2D2A,CCNB1IP1,CDK5RAP2,CNOT3,CRIP1,CSDE1,DCC,DGKA,DIRAS1,DOP1A,DOP1B,DPP4,DROSHA,EDNRB,EP300,EPAS1,EZH2,FAM171B,FBXW11,FLI1,FLT1,FOXD1,FOXM1,FOXO1,FOXP1,FST,GATA2,GNMT,HDAC6,HEATR5B,HGF,HSPG2,IFIH1,IGFBP5,IL24,IL6,IL7,ITGA1,ITPR3,JAM3,KCTD12,KDR,KIF20B,KIT,KLF12,KMT2A,KMT2C,LAMA4,LPIN1,MAPKAPK3,MARCHF8,MERTK,MKI67,MRPS18B,MTCL1,M…	109
Cancer,Organismal Injury and Abnormalities	Invasive cancer	2.17E-21	20.6635	6.45833e-21	20.1899	3.182	AASS,ABR,ACKR3,ADAMTS10,ADAMTS9,ADAR,ADGRA2,ADGRF5,ADORA3,ADRA1D,ADRA2A,AFAP1L1,AFDN,AKAP13,ALDH2,AMOT,APOD,AR,ARFGEF2,ARID2,ARRB1,ASAP1,ASL,ATP7A,ATP9A,ATR,AXIN2,BCL2L11,BCL9,BCOR,BMPR2,BRCA2,CAVIN2,CBL,CCDC80,CCDC88C,CCL5,CCN3,CCR7,CDK6,CEP192,CHD4,CLCN3,CLEC11A,CLU,CNOT3,COL9A3,CRYBG1,CSF2RB,CX3CL1,DAXX,DCC,DGKA,DIRAS1,DROSHA,E2F8,EDNRB,EFNB2,ELK4,EP300,EPAS1,EPB41L4B,ETFDH,ETS1,ETV1,EXOC6B,EZ…	255
Organismal Injury and Abnormalities	Visceromegaly	3.88E-13	12.4112	7.82258e-13	12.1066	3.179	ABCC1,ACE,ACKR3,ADAR,ADK,ADORA3,ADRA1D,ADRA2A,AHR,AKAP13,AKAP9,AR,ARID4A,ATAT1,B3GNT5,BCL2L11,BMPR2,BMX,CAST,CBL,CCR7,CDK6,CDK7,CDON,CDS2,CHD7,CIB1,CMKLR1,CNOT3,CSF2RB,CYP1A1,DDIAS,DPP4,DYSF,EDNRB,EP300,EPAS1,ETS1,FAM120B,FLI1,FLT1,FOXM1,FOXO1,FRRS1,GATA2,GPER1,GUCY1A1,HDAC9,HEY2,HGF,HTR1B,IER3,IGF2R,IL6,IL7,INPP5D,IRAG1,ITGA2B,JAK1,JARID2,JPH2,KCNQ1,KIT,KLF13,LAMA4,LAT,LPL,MAP2K6,MBNL1,MBNL2,MED…	127
Organismal Development,Tissue Development	Development of epithelial tissue	3.91E-13	12.4078	7.85571e-13	12.1048	3.178	ABCA3,AHR,AKAP9,APP,AR,BCL2L11,BMPR2,CALCRL,CAVIN2,CBL,CCR7,CD34,CHD7,DAB2,DGKA,DYSF,EDNRB,EFNB2,ERN1,FLI1,FLNB,FLT1,FOXM1,FOXO1,FOXP1,FRAS1,FRS2,HEY2,HGF,HPS1,HSPG2,IL24,IL6,INHBB,IQGAP1,ITGA1,ITGA2,ITGAX,JMJD1C,KDR,KIT,LAMA4,LAMC1,MAGI1,MAP2K6,MAP3K1,MERTK,MTOR,MYOF,NCOA3,NF1,NID1,NOTCH1,NR5A2,NRP2,OFD1,PFKFB3,PIK3C2A,PIK3C2B,PIK3CG,PLCG1,PLD1,PPARG,PPP1R16B,PRDM1,PRKD2,PRKDC,PSMB8,PTPN11,PTPRM…	94
Cellular Development,Cellular Growth and Proliferation	Colony formation of cells	1.20E-10	9.92082	2.01342e-10	9.69607	3.178	ACKR3,AHR,AKAP13,AR,ATR,AXIN2,BCL2L11,BMAL2,BRCA2,CAST,CBL,CCL23,CCN3,CCNB1IP1,CDK5RAP2,CDK6,CDK7,CHD4,CIT,CLEC11A,CLU,CSF2RB,DPP4,DROSHA,DSTYK,E2F8,EIF6,EP400,EPAS1,ETS1,EXOC6B,EZH2,FAM171B,FLT1,FOXM1,FRS2,GBP1P1,GPER1,GRAMD1A,GSE1,HGF,HSPA1A,IFIH1,IGFBP5,IL24,IL6,IL7,INPP5D,IQGAP1,ITGA1,ITGA6,ITGB4,JAM3,KAT2B,KCNJ12,KIT,KLF13,KLF8,KMT2A,KMT2C,LIMA1,LPIN1,LTBP1,MAML1,MAP3K1,MBNL1,MCF2L,MECOM,MLL…	120
Cell Morphology,Cellular Assembly and Organization,Cellular Development,Cellular Function and Maintenance,Cellular Growth and Proliferation,Nervous System Development and Function,Organismal Development,Tissue Development	Formation of dendrites	3.72E-09	8.42946	5.11692e-09	8.29099	3.169	ABI1,AFDN,AGTPBP1,APP,ASAP1,ATP7A,BTBD3,CASK,CDKL5,CHN1,CIT,CPEB3,DCC,EIF4G3,EPHA4,EZH2,FOXO6,FZD4,HDAC6,HGF,IQGAP1,IQSEC1,KALRN,MPDZ,MTOR,MYO6,NF1,NFIA,PAK3,PALM,PLXNB1,POMC,PREX1,PREX2,RAPH1,RBFOX2,RERE,ROCK2,SDC2,SHANK3,SLC12A5,SMAD1,SMAD4,UBE3A,ZDHHC15,ZMYND8	46
Cardiovascular Disease,Organismal Injury and Abnormalities	Abnormal morphology of heart	2.55E-16	15.5935	6.25e-16	15.2041	3.164	ABCC1,ABI1,ACE,ACKR3,ADAMTS9,ADAR,ADK,ADORA3,ADRA1D,ADRA2A,AFDN,AHR,AKAP13,AKAP9,ARHGEF12,ATAT1,ATE1,BCAS3,BMPR2,BMX,CALCRL,CAST,CCN3,CDK6,CDK7,CDS2,CHD7,CIB1,CLU,CMKLR1,CNOT3,CSDE1,DCHS1,DDIAS,DPP4,DYSF,EFNB2,EP300,EPAS1,EPM2A,ETS1,FAM120B,FAT4,FLRT2,FLT1,FOXM1,FOXO1,FOXP1,FRRS1,GATA2,GPER1,GUCY1A1,HDAC9,HEY2,HGF,HIF3A,HSPG2,HTR1B,IER3,IGF2R,IL6,JARID2,JPH2,KCNQ1,LAMA4,LPL,LTBP1,MAML1,MAML3,MAP2…	128
Hematological System Development and Function,Tissue Morphology	Quantity of leukocytes	9.74E-14	13.0114	2.07234e-13	12.6835	3.159	ABCG2,ACACA,ACKR3,ADAR,ADORA3,AFF1,AHR,AKAP13,ALDH2,APP,AR,ARHGEF6,ARID4A,B3GNT5,BCL2L11,BMAL1,BMPR2,C1QL3,CALCRL,CAMKK2,CBL,CCL5,CCR7,CD34,CD74,CDK6,CHD7,CLEC11A,CLU,CMKLR1,CSF2RB,CX3CL1,CYP1A1,CYSLTR1,DAXX,DGKA,DOCK8,DPP4,EBF1,EFNB2,ELK4,EP300,EPAS1,EPHA4,EPS15,ETS1,EZH2,FCMR,FLI1,FLT1,FOXO1,FOXP1,GAB2,GATA2,GHR,GLCCI1,HGF,HLA-DRB1,IFIH1,IGF2R,IL6,IL7,INPP5D,IRAK3,IRF6,ITGA2,ITGA6,ITPKB,ITPR3,J…	151
Developmental Disorder,Ophthalmic Disease,Organismal Injury and Abnormalities	Congenital anomaly of eye	1.02E-07	6.9914	1.16705e-07	6.93291	3.132	ADAMTS10,ADAMTS9,BCOR,CC2D2A,CDON,CHN1,CLU,COL7A1,CRIM1,CSGALNACT1,EP300,FRAS1,FRS2,FYCO1,FZD4,GLCE,GMPPA,HDAC6,HIP1,HPS1,HPS3,HPS5,IFT172,IRX5,JAM3,LRBA,MED23,MPDZ,MTHFD2,NF1,NFIB,PANK4,PDE6B,PIK3C2A,PTPN11,PXDN,RERE,RIPK4,RXRB,STIM1,TEK,TFAP2A,VIM,WDR37,WFS1,ZDBF2,ZDHHC15	47
Hematological System Development and Function,Tissue Morphology	Quantity of blood cells	1.03E-15	14.9872	2.45238e-15	14.6104	3.128	ABCG2,ACACA,ACKR3,ADAR,ADORA3,AFF1,AHR,AKAP13,ALDH2,APP,AR,ARHGEF6,ARID4A,B3GNT5,BCL2L11,BMAL1,BMPR2,BRCA2,C1QL3,CALCRL,CAMKK2,CBL,CCL5,CCR7,CD34,CD74,CDK6,CELF2,CHD7,CIB1,CLEC11A,CLU,CMKLR1,CSF2RB,CX3CL1,CYP1A1,CYSLTR1,DAXX,DGKA,DOCK8,DPP4,EBF1,EFNB2,ELK4,EP300,EPAS1,EPHA4,EPS15,ETS1,EZH2,FCMR,FLI1,FLT1,FOXO1,FOXP1,GAB2,GATA2,GHR,GLCCI1,HGF,HLA-DRB1,IFIH1,IGF2R,IL6,IL7,INPP5D,IRAK3,IRF6,ITGA2,IT…	169
Cellular Movement	Migration of vascular cells	3.39E-07	6.4698	3.58351e-07	6.44569	3.127	ACACA,ACKR3,ARFGEF1,ARFGEF2,ARHGEF6,ATP7A,BMPR2,CALCRL,CAVIN2,CCL5,CCN3,CDK6,EFNB2,FLNB,FLT1,FOXO1,FRS2,FZD4,HGF,IGFBP5,IL24,IL6,IQGAP1,ITGB4,KDM2B,KDR,KMT2A,NFATC1,PIK3C2A,PIK3C2B,PIK3CG,PLCG1,PLPP3,PLXND1,PPARG,PRKD2,RCAN2,STAB2,TGFBR2,THSD7A,TJP1,VAV3,WWP2	43
Cellular Function and Maintenance	Endocytosis	2.69E-12	11.5702	5.11407e-12	11.2912	3.122	ABI1,ACE,ADAR,APBA1,APP,ARHGAP27,ARRB1,ATAT1,ATG2A,ATP6V1A,BMX,BTBD8,CBL,CCL5,CCR7,CD177,CD93,CFB,CHN1,CLCN3,CLIP3,CLU,CSF2RB,CX3CL1,DAB2,DOCK8,ENTREP1,EPS15,FCHSD2,FCMR,FLRT2,FNBP1L,FOXP1,FRS2,GAB2,HGF,HIP1,HSPG2,IGF2R,IL6,IL7,INPP5D,IQGAP1,IQSEC1,ITSN2,JAK1,JOSD1,LAT,MAPKAPK3,MBNL1,MERTK,MTMR4,MYO6,NCDN,NEDD4L,NF1,NRP2,NSF,OSBP2,OSTM1,PAN3,PFKFB3,PIK3C2A,PLD1,POMC,PPARG,PRKAA2,PRKD2,PRKN,RAB15,…	95
Cardiovascular Disease,Developmental Disorder,Hereditary Disorder,Organismal Injury and Abnormalities	Familial congenital heart disease	6.04E-09	8.21896	8.02125e-09	8.09576	3.116	ACVR2A,AKAP9,ATE1,BCL9,BMPR2,CCL5,DCHS1,ETS1,FMO5,FOXP1,HEY2,HSPG2,ITPR3,KCNJ5,KCNQ1,KLF12,KLF13,LTBP1,MRTFB,NF1,NFATC1,PBX1,PBX2,PLXND1,PRKACB,PTPN11,RAI2,RBFOX2,RERE,ROCK2,SCN3B,SMAD1,SOX7,TFAP2A,TGFBR3,USP34	36
Cardiovascular Disease,Hereditary Disorder,Organismal Injury and Abnormalities	Familial heart disease	5.60E-08	7.25181	6.596e-08	7.18072	3.116	ABI1,ACVR2A,AKAP9,ATE1,BCL9,BMPR2,CCL5,DCHS1,ETS1,FMO5,FOXP1,GUCY1A1,HEY2,HSPG2,ITPR3,JPH2,KALRN,KCNJ12,KCNJ5,KCNQ1,KLF12,KLF13,KLHL24,LAMA4,LAMC1,LPL,LTBP1,MED12,MRTFB,MTHFD2,MYO6,NF1,NFATC1,NOTCH1,PBX1,PBX2,PLXND1,PRKACB,PTPN11,RAI2,RAPGEF5,RBFOX2,RERE,ROCK2,RRAGD,SCN3B,SMAD1,SOX7,TFAP2A,TGFBR2,TGFBR3,TJP1,USP34,VIM	54
Organismal Injury and Abnormalities	Fibrosis	1.41E-09	8.85078	2.06745e-09	8.68457	3.098	ABCA3,ABCC1,ABCG2,ABI1,ACE,ADK,ADORA3,ADRA1D,ADRA2A,AHR,AKAP13,APP,AR,ARID4A,ATP11A,ATP2B4,ATP7B,BMPR2,CBL,CC2D2A,CCL5,CCR7,CD74,CDON,CEP120,CIB1,CLEC16A,CLOCK,CLU,CMKLR1,CNOT3,CRLF1,CX3CL1,DPP4,DYSF,EDNRB,EFNB2,EIF6,EP300,EPAS1,ERN1,ETS1,EZH2,FAT4,FLI1,FLT1,FMO5,FOXM1,FOXN3,FOXO1,FST,GAB2,GBP4,GHR,GPER1,HDAC9,HEY2,HGF,HIF3A,HLA-DPB1,HMGCS1,HTR1B,IFIH1,IL18R1,IL6,IL7,INPP5D,IQGAP1,IRAK3,ITGA6,ITG…	142
Cellular Assembly and Organization	Assembly of organelle	6.07E-17	16.2168	1.53283e-16	15.8145	3.074	ABCA3,ABI1,ACE,ADAMTS10,ADAMTS9,ADGRF5,AHR,AKAP13,AKAP9,AMOT,APP,AR,ARFGEF1,ARFGEF2,ARHGAP19,ARHGAP28,ARHGEF12,ARRB1,ASAP1,ATAT1,ATG2A,BIRC6,BMX,BRCA2,CAST,CC2D2A,CD34,CDC14A,CDK5RAP2,CDK6,CDKL5,CEP120,CEP162,CEP192,CEP20,CEP290,CEP295,CFAP206,CFAP54,CGNL1,CIT,CLIP3,CNTNAP1,CORO2B,CRACD,DAB2,DNALI1,DYNC2H1,EHMT2,EIF6,EP300,EPM2A,EPS15,FAM161A,FCHSD2,FNBP1L,FOXM1,GEN1,HDAC6,HGF,HIP1,HPS1,IFT172,IL…	140
Cellular Development,Cellular Growth and Proliferation,Hematological System Development and Function,Lymphoid Tissue Structure and Development	Proliferation of immune cells	6.93E-12	11.1593	1.28571e-11	10.8909	3.071	ABI1,ADK,AHR,AKAP13,ANO6,ARHGEF6,ATF6B,B3GNT5,BCL2L11,BCOR,CBL,CCL5,CCR7,CD74,CDK6,CFB,CHD4,CLEC11A,CLU,CSF2RB,CX3CL1,CYSLTR1,DGKA,DOCK8,DPP4,DUSP14,EBF1,EFNB2,EP300,ETS1,FLI1,FOXO1,FOXP1,GAB2,GATA2,HGF,HLA-DPB1,HLA-DRB1,HSPA1A,IDE,IL24,IL6,IL7,INPP5D,IQGAP1,IRF6,ITGA2,ITGA2B,ITGAX,ITPR3,JAK1,KDR,KIT,LAT,LCP1,LEF1,LPIN1,LTBP1,MAP2K6,MAP3K1,MARCHF8,MCF2L,MERTK,MTHFD2,MTOR,NBEAL2,NCSTN,NF1,NFATC1,N…	117
Cardiovascular Disease,Organismal Injury and Abnormalities	Abnormal morphology of heart ventricle	1.21E-10	9.91721	2.0268e-10	9.69319	3.07	ACE,ACKR3,ADORA3,ADRA1D,ADRA2A,ATAT1,BMPR2,BMX,CCN3,CDK6,CDK7,CLU,CSDE1,DCHS1,EP300,EPAS1,ETS1,FOXM1,FOXO1,GUCY1A1,HDAC9,HEY2,HIF3A,HSPG2,IER3,IGF2R,IL6,LAMA4,MAP3K1,MBNL1,MBNL2,MTOR,NFATC1,NOTCH1,NPR1,NR3C2,PBX1,PBX2,PDE9A,PHC1,PHF8,PLCB1,PRKAA2,PTPN11,RPS6KA2,SHC1,SPTBN1,TEK,TGFBR2,UTRN,VAV3,VIP	52
Cellular Function and Maintenance	Engulfment of cells	1.10E-09	8.95861	1.63934e-09	8.78533	3.069	ABI1,ABR,ACE,ADAR,APBA1,APP,ARRB1,ASAP2,ATAT1,ATP6V1A,BMX,CBL,CCL5,CCR7,CD177,CD93,CFB,CHN1,CLCN3,CLIP3,CSF2RB,CX3CL1,DAB2,DOCK8,DYSF,ENTREP1,EPHA4,EPS15,FCHSD2,FCMR,FLRT2,FOXP1,FRS2,GAB2,GATA2,HGF,HIP1,IL6,IL7,INPP5D,IQGAP1,IQSEC1,JAK1,JOSD1,LAT,MBNL1,MERTK,MTMR4,NCDN,NEDD4L,NF1,NRP2,OSBP2,PAN3,PFKFB3,PIK3C2B,PLD1,POMC,PPARG,PRKAA2,PRKD2,RGS5,RORA,RPTOR,SHANK3,SLC7A8,SPHK1,STAB2,STAT1,STIM1,STON…	80
Cellular Growth and Proliferation,Lymphoid Tissue Structure and Development	Proliferation of lymphatic system cells	6.62E-13	12.1791	1.2955e-12	11.8876	3.067	ABI1,ADAR,ADK,AHR,AKAP13,ANO6,APP,ARHGEF6,ATF6B,B3GNT5,BCL2L11,BCOR,CBL,CCL5,CCR7,CD74,CDK6,CFB,CHD4,CLEC11A,CMKLR1,CSF2RB,CYSLTR1,DGKA,DOCK8,DPP4,DUSP14,EBF1,EFNB2,EP300,ETS1,FLI1,FOXM1,FOXO1,FOXP1,GAB2,GATA2,HLA-DPB1,HLA-DRB1,HSPA1A,IL24,IL6,IL7,INPP5D,IQGAP1,IRF6,ITGA2,ITGA2B,ITGAX,ITPKB,ITPR3,KDR,KIT,KMT2A,LAT,LCP1,LEF1,LPIN1,LTBP1,MAP2K6,MAP3K1,MARCHF8,MCF2L,MERTK,MTHFD2,MTOR,NCSTN,NF1,NFATC…	119
Cardiovascular Disease,Organismal Injury and Abnormalities	Valvulopathy	3.16E-07	6.50031	3.35813e-07	6.4739	3.067	ABI1,ACE,ACKR3,ADAMTS9,ADRA2A,APOD,BCAS3,BMPR2,CCR7,CDK6,CEP192,CHD4,CLU,DCHS1,DYSF,ETS1,FLT1,GABRP,GLCE,GPC5,HAPLN1,HEY2,HGF,HSPA1A,HSPG2,HTR1B,IL6,ITGA2B,ITGB4,ITGBL1,KDR,KRT7,MECOM,MT-CO1,MT-CO2,NF1,NFATC1,NOTCH1,OAS3,PBX1,PBX2,PDE11A,PDE4C,PDE7B,PDE9A,PHC1,PLD1,PRND,PTPN11,RGS12,SDC2,SEMA6A,SPHK1,SPTA1,SPTBN1,TNC,TNFSF4,TUBB,VCAN,VIM,VWF,ZMIZ1	62
Cell Morphology,Cellular Function and Maintenance	Autophagy	2.77E-07	6.55752	2.9817e-07	6.52554	3.066	ACBD5,ACER2,ACVR2A,ALDH2,APAF1,APP,ATG2A,BCL2L11,BIRC6,BMAL1,CAMKK2,CAST,CLEC11A,CLEC16A,CUL9,DDX52,DRAM2,EHMT2,EP300,EPAS1,EPM2A,ERN1,FOXM1,FOXO1,FYCO1,GRAMD1C,HDAC6,HERC1,HSPG2,IL24,IL6,ITGB4,KCNN3,KDR,KLHL3,LAMP3,LPIN1,LRBA,MID2,MOAP1,MRPL52,MTOR,MTSS1,MYOF,NEDD4L,NEDD9,OSTM1,PFKFB3,PIK3C2A,PIK3C2B,PIK3R2,PLD1,PPARG,PRKAA2,PRKCQ,PRKDC,PRKN,RALGAPB,REST,RNF152,ROCK2,RPTOR,RRAGD,SETD2,SHC1,SHROO…	92
Neurological Disease,Organismal Injury and Abnormalities	Sensory disorders	9.14E-09	8.03905	1.19321e-08	7.92328	3.046	ABCC1,ABI1,ADK,ADRA2A,AMOT,ANKRD36,APP,ARHGEF28,ARRB1,ARSG,ATP11A,ATP6V1A,CCL5,CCR7,CDC14A,CEP290,CFB,CHD7,CHM,CLCN3,COL9A3,CX3CL1,DMXL2,DOCK9,DPP4,EDNRB,EML6,FLT1,FMC1-LUC7L2,FST,FZD4,GABRP,HDAC6,HGF,IL6,IL7,IQGAP2,ITGB4,JMY,KCNQ1,KIF13B,KIT,LOC127814297,LRBA,MARVELD2,MAST2,MED12,MERTK,MPDZ,MT-CO1,MT-ND6,MTOR,MYCBP2,MYO1C,MYO1D,MYO6,NAPEPLD,NRIP1,OTOGL,PBX1,PDE11A,PDE6B,PDE9A,PIK3CG,PIK3R3,POMC,…	88
Cell Death and Survival,Organismal Injury and Abnormalities	Cell viability of leukocytes	4.81E-10	9.31785	7.52739e-10	9.12336	3.037	APP,ARRB1,BCL2L11,CBL,CCR7,CD74,CHD4,CLEC11A,CLOCK,CLU,CSF2RB,CX3CL1,DOCK8,EBF1,ERN1,FCMR,FOXO1,FOXP1,GAB2,HGF,IL6,IL7,INPP5D,ITPKB,ITPR3,JAK1,KIT,LAT,LEF1,MCF2L,MTOR,NF1,NOTCH1,PARP14,PIK3CG,PLXNB1,PRDM1,PRKCQ,REL,RPTOR,SMAD4,STAT1,TNFSF9,TSC1,TSC22D3,VIP	46
Embryonic Development,Organismal Development	Development of genitourinary system	2.87E-11	10.5421	5.07965e-11	10.2942	3.029	ABI1,ACACA,ACE,ACVR2A,ADRA2A,AHR,AKAP9,AR,ARHGEF12,ARID4A,ARRB1,ATAT1,ATE1,ATP7B,BCL2L11,BIRC6,BMAL1,BRCA2,BRME1,CCNB1IP1,CDK5RAP2,CDK6,CELF1,CEP120,CFAP54,CFB,CHD7,CIB1,CIT,CLOCK,CSDE1,CX3CL1,CYP4X1,DCHS1,DDIAS,DMXL2,DNALI1,E2F8,EDA,EHMT2,EIF4G3,EPAS1,ERMP1,EZH2,FAT4,FLT1,FMO5,FOXD1,FOXJ3,FRAS1,FST,GATA2,GGNBP2,GHR,GPER1,GSE1,HDAC6,HERC2,HGF,HIP1,HPS1,IGF2R,IGFBP5,INHBB,IRX5,ITGA1,ITGA2,ITGA6,IT…	144
Cellular Assembly and Organization,Organismal Development,Tissue Development	Fibrogenesis	9.27E-11	10.0329	1.58462e-10	9.80008	2.996	ACE,ADAMTS10,ADGRF5,AKAP13,AKAP9,AMOT,APP,AR,ARFGEF1,ARHGAP19,ARHGAP28,ARHGEF12,ARRB1,BMX,BRCA2,CDC14A,CDK5RAP2,CDK6,CEP20,CGNL1,CHD4,CLIP3,CNTNAP1,CORO2B,CRACD,DAB2,DYSF,EP300,EPAS1,FCHSD2,FMNL2,FOXM1,HDAC6,HGF,IL6,JMY,KDR,MAGI1,MAP2K6,MAP3K1,MCF2L,MDM1,MTOR,MTSS1,MYO1C,NF1,NFATC1,NOTCH1,NPR1,PAK3,PIK3C2B,PIK3R2,PLD1,PLXNB1,PREX1,PRKAA2,PRKCH,PRKCQ,PRUNE1,PTPN11,PTPRB,REL,ROCK2,SDC2,SKA1,SMAD4,S…	79
Cardiovascular System Development and Function,Organismal Development,Tissue Development	Development of endothelial tissue	9.42E-10	9.02595	1.41867e-09	8.84812	2.972	APP,BMPR2,CALCRL,CAVIN2,CBL,CCR7,CD34,DAB2,DGKA,DYSF,EDNRB,EFNB2,ERN1,FLI1,FLT1,FOXM1,FOXO1,FOXP1,FRS2,HGF,HSPG2,IL24,IL6,IQGAP1,ITGA1,ITGA2,ITGAX,KDR,KIT,MAGI1,MAP2K6,MERTK,MTOR,MYOF,NCOA3,NF1,NOTCH1,NRP2,PFKFB3,PIK3C2A,PIK3C2B,PIK3CG,PLCG1,PLD1,PPARG,PPP1R16B,PRKD2,PRKDC,PTPRM,RCAN2,RGS5,RPTOR,SEMA6A,SLC38A5,SP1,SPEN,STAT1,STC1,TEK,TFAP2A,TGFBR2,TNFRSF12A,VIP,WWP2,WWTR1	65
Cellular Function and Maintenance	Endocytosis by eukaryotic cells	3.40E-09	8.46852	4.71567e-09	8.32646	2.954	ABI1,ACE,ADAR,APBA1,APP,ARRB1,ATAT1,ATP6V1A,BMX,CBL,CCL5,CCR7,CD93,CFB,CHN1,CLCN3,CSF2RB,CX3CL1,DAB2,DOCK8,ENTREP1,EPS15,FCHSD2,FCMR,FLRT2,FOXP1,FRS2,GAB2,HGF,IL6,IL7,INPP5D,IQGAP1,IQSEC1,JAK1,JOSD1,LAT,MBNL1,MERTK,MTMR4,NCDN,NF1,NRP2,OSBP2,PAN3,PFKFB3,PLD1,POMC,PPARG,PRKAA2,PRKD2,RGS5,RORA,RPTOR,SHANK3,SLC7A8,STAB2,STAT1,STIM1,SUPT20H,USP22,VIM,VIP,ZMYND8	64
Cell Morphology,Cellular Assembly and Organization,Cellular Function and Maintenance	Extension of cellular protrusions	1.86E-07	6.73049	2.05298e-07	6.68762	2.948	AFDN,APP,ARRB1,BMX,CAST,CDKL5,EP300,FLT1,HGF,IL6,INPP5D,ITSN2,KALRN,KDR,MACF1,NEDD4L,NFIA,NOTCH1,NRP2,PJA2,PLD1,PLXNB1,PRKN,RAPH1,RNF157,RRAD,SLAIN1,SLC23A2,SMAD4,SORL1,SP1,SPG11,SYT1,TNFRSF12A,TRIM46,TSC1,VIP,ZFYVE27	38
Auditory Disease,Neurological Disease,Organismal Injury and Abnormalities	Hearing loss	4.94E-09	8.30627	6.63978e-09	8.17785	2.932	ABCC1,ABI1,ADK,ANKRD36,ARHGEF28,ARSG,ATP11A,CCL5,CCR7,CDC14A,CFB,CHM,COL9A3,DMXL2,DPP4,EDNRB,EML6,FMC1-LUC7L2,FST,FZD4,HDAC6,HGF,IL6,IL7,IQGAP2,ITGB4,JMY,KCNQ1,KIT,LOC127814297,LRBA,MARVELD2,MAST2,MED12,MPDZ,MT-CO1,MT-ND6,MTOR,MYO1C,MYO1D,MYO6,NAPEPLD,OTOGL,PBX1,PIK3R3,PRR14L,RDX,RERE,REST,RPTOR,SLC12A7,SLC44A4,SMAD4,SPTBN1,TCF19,THSD7A,TJP2,TLR1,TLR6,TMTC2,TNC,TRMU,TRPV1,TSC1,WFS1	65
Cell Morphology,Cellular Function and Maintenance	Autophagy of cells	3.29E-07	6.4828	3.48517e-07	6.45778	2.926	ACER2,ACVR2A,ALDH2,APAF1,APP,ATG2A,BCL2L11,BMAL1,CAMKK2,CAST,CLEC11A,DRAM2,EHMT2,EP300,EPAS1,EPM2A,ERN1,FOXM1,FOXO1,GRAMD1C,HDAC6,HERC1,HSPG2,IL24,IL6,ITGB4,KDR,KLHL3,LAMP3,MID2,MRPL52,MTOR,MYOF,NEDD4L,PFKFB3,PIK3C2A,PIK3C2B,PIK3R2,PLD1,PPARG,PRKAA2,PRKCQ,PRKDC,PRKN,RALGAPB,REST,RNF152,ROCK2,RPTOR,RRAGD,SETD2,SMAD4,SP1,SPHK1,STAT1,STIM1,STING1,TBC1D14,TBC1D5,TJP1,TLR1,TLR6,TP53INP2,TRIM27,TRIM32,…	72
Cardiovascular Disease,Organismal Injury and Abnormalities	Enlargement of heart	3.70E-10	9.4318	5.86371e-10	9.23183	2.907	ABCC1,ACE,ACKR3,ADAR,ADK,ADORA3,ADRA1D,ADRA2A,AHR,AKAP13,AKAP9,ATAT1,BMPR2,BMX,CAST,CDK7,CDS2,CHD7,CIB1,CMKLR1,CNOT3,DDIAS,DPP4,DYSF,EP300,EPAS1,FAM120B,FLT1,FOXM1,FOXO1,FRRS1,GPER1,GUCY1A1,HDAC9,HEY2,HGF,HTR1B,IER3,IGF2R,IL6,JARID2,JPH2,KCNQ1,LAMA4,LPL,MAP2K6,MBNL1,MBNL2,MED12,MLIP,MTOR,NEDD4L,NF1,NFATC1,NOTCH1,NPR1,NPR3,NR3C2,PBX1,PBX2,PDE9A,PHC1,PIK3CG,PLCB1,PPARG,PRKAA2,PRKN,PTPN11,RAB11FIP3,…	93
Embryonic Development,Organismal Development	Growth of embryo	6.04E-07	6.21896	6.10101e-07	6.2146	2.86	ACACA,ACVR2A,AFAP1L1,AFDN,AHR,APP,AR,ATE1,ATF7,BMAL1,BMPR2,CDK6,CDON,CEP120,CLU,CMKLR1,CSDE1,CX3CL1,DLGAP4,EDA,EDNRB,EHMT2,EP300,EP400,EPAS1,EZH2,FBXW11,FLT1,FOXM1,FOXO1,FOXP1,FRS2,GAB2,GATA2,HGF,HSPG2,IGFBP5,IL6,ITGA1,ITGA6,KDM2B,KDR,KIT,MACF1,MAP3K1,MTOR,NCOA3,NF1,NFIA,NFIB,NOTCH1,PDE9A,PLCG1,PPARG,PRDM1,PTPN11,SHANK3,SMAD1,SMAD4,SMARCA1,STAT1,TGFBR2,TGIF2,TNC,TRPV1,TSC1,UBR4	67
Cell Morphology	Shape change of neurites	6.33E-07	6.1986	6.37462e-07	6.19555	2.834	ABI1,AFDN,APBA1,APP,ASAP1,CAMKK2,CASK,CDKL5,CHN1,CPEB3,CRIP1,DCC,EIF4G3,EPHA4,FNBP1L,FOXO6,GPRIN3,HDAC6,HDAC9,HGF,IL6,IQSEC1,ITSN2,KALRN,KIF13B,MT2A,MTOR,NCAM2,NEDD4L,NF1,NOTCH1,NR3C2,NRP2,NUAK1,PAK3,PALM,PKP4,PLD1,PRKN,RAPH1,RNF157,ROCK2,SDC2,SEMA6A,SHANK3,SLC12A5,SLC23A2,SMAD4,SYT1,TMOD1,TSC1,UBE3A,VIP,ZDHHC15,ZMYND8	55
Cellular Function and Maintenance,Protein Degradation,Protein Synthesis	Catabolism of protein	2.90E-10	9.5376	4.63259e-10	9.33418	2.83	ACE,ADAMTS9,AHR,APAF1,APP,ARRB1,ATE1,BACE2,BFAR,BMAL1,CAST,CBL,CD74,CDK7,CLEC16A,CLOCK,CLU,CREBRF,DCAF11,DERL3,DPP4,DTX4,DYSF,ECPAS,EDEM3,EP300,EPHA4,EPM2A,FBXW11,FOLH1,FOXO1,FYCO1,GOLGA7,HDAC6,HERC2,HIP1,HSPA1A,HSPG2,IDE,IER3,IRAK3,JAK1,KLHL15,KLHL3,LAMP3,LPL,LSR,MAP3K1,MMEL1,MMP16,MTOR,MYCBP2,NAALAD2,NCSTN,NEDD4L,NOTCH1,NSF,NTAN1,OAZ1,PER3,PJA2,PLPP3,PPP1R11,PRKCQ,PRKN,RASSF2,RCN3,RDX,RNF125,RN…	103
Cellular Function and Maintenance	Catabolism of macromolecule	9.29E-10	9.03198	1.40121e-09	8.8535	2.83	ACE,ADAMTS9,AHR,APAF1,APP,ARRB1,ATE1,BACE2,BFAR,BMAL1,CAST,CBL,CD74,CDK7,CLEC16A,CLOCK,CLU,CNOT6L,CREBRF,DCAF11,DERL3,DPP4,DTX4,DYSF,ECPAS,EDEM3,EP300,EPHA4,EPM2A,ERN1,FBXW11,FOLH1,FOXO1,FYCO1,GOLGA7,HDAC6,HERC2,HIP1,HSPA1A,HSPG2,IDE,IER3,IRAK3,JAK1,KLHL15,KLHL3,LAMP3,LPL,LSM2,LSR,MAP3K1,MMEL1,MMP16,MTOR,MYCBP2,NAALAD2,NCSTN,NEDD4L,NOTCH1,NSF,NTAN1,OAZ1,PER3,PJA2,PLPP3,PPP1R11,PRKCQ,PRKN,RASSF2,R…	107
Cellular Movement,Hematological System Development and Function,Immune Cell Trafficking,Inflammatory Response	Migration of phagocytes	2.22E-07	6.65365	2.40781e-07	6.61838	2.806	ABCC1,APP,AR,BMPR2,C1QL3,CCL5,CCR7,CD177,CD74,CLEC11A,CMKLR1,CSF2RB,CX3CL1,DGKA,DOCK8,EPAS1,FLRT2,FLT1,HGF,IL6,INPP5D,IRF6,ITGA1,ITGA6,ITGAX,JAK1,JAM3,KDR,KIT,NRP2,PIK3CG,PLXNB1,PLXND1,PPARG,PREX1,PRKCQ,PTPRB,RPTOR,SH2B3,STAT1,TGFBR2,TNC,TNFSF9,TRPV1,VAV3,VCAN,VIP	47
Cellular Movement	Migration of neural cells	2.34E-07	6.63078	2.52427e-07	6.59786	2.802	ACKR3,APP,ARFGEF2,ATAT1,CAMKK2,CDKL5,CLOCK,CSDE1,CX3CL1,DCC,DLGAP4,EBF1,EDNRB,EFNB2,EPHA4,FILIP1,FLRT2,GATA2,HDAC6,HGF,ITGA6,KDR,KIF20B,KIT,LAMC1,LHX6,MRTFB,NAV1,NF1,NFIA,NRP2,PREX1,PRKAA2,PTPRB,RBFOX2,RERE,SDCCAG8,SEMA6A,ST8SIA4,TGFBR2,TNC,TOP2B,TRIM46,VCAN,VIM	45
Cardiovascular System Development and Function	Morphogenesis of cardiovascular system	9.69E-10	9.01368	1.45495e-09	8.83715	2.799	ADAMTS9,ADGRF5,AHR,AMOT,ARID2,AXIN2,BMPR2,CHD7,DCHS1,EFNB2,FAT4,FLRT2,FLT1,FOXP1,FZD4,HEY2,HGF,IFT172,ITGAX,KDR,MAGI1,MAML1,MAML3,MAP2K6,MECOM,MRTFB,MTOR,NF1,NFATC1,NIPBL,NOTCH1,PHC1,PIK3C2A,PIK3C2B,PIK3CG,PLXND1,PRDM1,PRKD2,SMAD1,SMAD4,SP1,STC1,TFAP2A,TGFBR2,TGFBR3,TMOD1,ZMIZ1	47
Embryonic Development,Organismal Development	Development of body trunk	9.76E-18	17.0106	2.59574e-17	16.5857	2.769	ACE,ACKR3,ACVR2A,ADAMTS9,ADAR,AHR,AKAP13,AKAP9,AR,ARID2,ARRB1,ASL,ATE1,ATF7,ATP7A,ATP7B,AXIN2,BCL2L11,BCOR,BMAL1,BMPR2,BRCA2,CALCRL,CBL,CC2D2A,CCL5,CCR7,CD74,CEP120,CEP290,CHD4,CHD7,CLU,CRIP1,CX3CL1,DCHS1,DYNC2H1,EDA,EDNRB,EHMT2,EP300,EPAS1,ERMP1,ERN1,ETS1,ETV1,EZH2,FAT4,FLI1,FLRT2,FLT1,FMNL2,FOXD1,FOXM1,FOXO1,FOXP1,FRAS1,FRS2,FST,GATA2,GHR,GLCE,GYS1,HDAC6,HDAC9,HEY2,HGF,HIF3A,HPS1,HSPG2,IFT172,I…	177
Organismal Development	Growth of organism	9.88E-09	8.00524	1.27814e-08	7.89342	2.762	ABCC1,ACACA,ACVR2A,ADAR,ADARB1,AFAP1L1,AFDN,AHR,APBA1,APP,AR,ARHGEF28,ATE1,ATF7,ATP6V1G2,BMAL1,BMPR2,BRCA2,CBL,CDK6,CDON,CEP120,CIT,CLU,CMKLR1,CRHBP,CSDE1,CX3CL1,DAXX,DLGAP4,EDA,EDNRB,EFNB2,EHMT2,EP300,EP400,EPAS1,EZH2,FBXW11,FLT1,FOXM1,FOXO1,FOXP1,FRS2,GAB2,GATA2,GHR,GIGYF2,HGF,HIP1,HSPG2,IGF2R,IGFBP5,IL6,INHBB,ITGA1,ITGA6,ITPR3,KDM2B,KDR,KIT,KMT2C,LAMB2,LCP1,MACF1,MAP3K1,MTOR,NCOA3,NF1,NFIA,NFI…	110
Cancer,Organismal Injury and Abnormalities,Reproductive System Disease	Mammary tumor	1.20E-47	46.9208	5.66038e-47	46.2472	2.753	AASS,ABCA6,ABCB7,ABCC1,ABCG2,ABR,ACBD5,ACE,ACVR2A,ADAMTS10,ADAMTS9,ADCK1,ADCY9,ADGRA2,ADGRF5,ADK,ADORA3,ADRA1D,ADRA2A,ADSS1,AFDN,AGTPBP1,AHCTF1,AKAP13,AKAP9,ALDH2,AMOT,ANKRD24,ANKRD36,ANO6,APAF1,APOD,APP,AR,ARFGEF1,ARHGAP19,ARHGAP27,ARHGEF12,ARID2,ARRB1,ARRDC3,ASAP1,ASL,ATAD2B,ATE1,ATF6B,ATG2A,ATP10A,ATP1A1,ATP2B4,ATP7A,ATP7B,ATR,AXIN2,B3GNT5,BCAS3,BCL2L11,BCL9,BCOR,BIRC6,BMAL1,BMAL2,BMPR2,BMX,BR…	533
Cardiovascular Disease,Organismal Injury and Abnormalities	Enlargement of heart ventricle	5.42E-10	9.266	8.44237e-10	9.07354	2.752	ACE,ACKR3,ADORA3,ADRA1D,ADRA2A,ATAT1,BMPR2,BMX,CDK7,EP300,EPAS1,FOXM1,FOXO1,GUCY1A1,HDAC9,HEY2,HIF3A,IER3,IGF2R,IL6,LAMA4,MBNL1,MBNL2,MTOR,NOTCH1,NPR1,NR3C2,PBX1,PBX2,PDE9A,PHC1,PLCB1,PRKAA2,PTPN11,TGFBR2,UTRN,VAV3,VIP	38
Cancer,Gastrointestinal Disease,Organismal Injury and Abnormalities	Pancreaticobiliary cancer	1.36E-48	47.8665	6.69951e-48	47.174	2.751	ABCA3,ABCA6,ABCG2,ABI1,ABR,ACE,ACKR3,ACVR2A,ADAMTS10,ADAMTS9,ADAR,ADARB1,ADORA3,ADRA2A,AFDN,AFF1,AHCTF1,AHNAK2,AHR,AKAP13,AKAP9,AMOT,ANKHD1-EIF4EBP3,ANKRD20A4P (includes others),ANKRD24,ANKRD36,ANKS1A,ANO6,APAF1,APP,AR,ARFGEF2,ARHGEF12,ARHGEF6,ARID2,ARID4A,ARSL,ATG2A,ATP10A,ATP11A,ATP2B4,ATP7A,ATP7B,ATR,AXIN2,BACE2,BAZ2A,BAZ2B,BCL2L11,BCL9,BFAR,BIRC6,BMAL1,BMPR2,BOC,BRCA2,BRME1,C22orf46P,C2orf81,…	470
Cardiovascular Disease,Hereditary Disorder,Organismal Injury and Abnormalities	Familial vascular disease	1.71E-12	11.767	3.28215e-12	11.4838	2.751	ABCA3,ACE,ACVR2A,APOLD1,APP,ATP13A3,ATR,BMPR2,CBLN1,CFB,EDNRB,F8,FLT1,FOXP1,GUCY1A1,HSPG2,IFIH1,IL6,JAK1,JAM2,JAM3,KALRN,KDR,LTBP1,MED12,MT-CO1,MT-ND6,MTOR,MYORG,NF1,NOTCH1,PBX1,PDE11A,PIK3R2,PLXND1,PPARG,PREX2,RERE,RNF213,SMAD1,SMAD4,STING1,TEK,TFAP2A,TGFBR2,TGFBR3,VCAN,VWF	48
Cardiovascular Disease,Organismal Injury and Abnormalities	Ventricular hypertrophy	2.32E-07	6.63451	2.5054e-07	6.60112	2.748	ACE,ADORA3,ADRA1D,ADRA2A,BMPR2,BMX,CDK7,EPAS1,FOXM1,FOXO1,GUCY1A1,HDAC9,IER3,IL6,LAMA4,MBNL1,MBNL2,MTOR,NR3C2,PBX1,PBX2,PHC1,PLCB1,PRKAA2,PTPN11,VAV3,VIP	27
Cardiovascular System Development and Function,Cellular Development,Cellular Function and Maintenance,Cellular Growth and Proliferation,Organismal Development,Tissue Development	Endothelial cell development	1.67E-09	8.77728	2.4238e-09	8.6155	2.747	APP,BMPR2,CALCRL,CAVIN2,CBL,CCR7,CD34,DAB2,DGKA,DYSF,EDNRB,EFNB2,ERN1,FLI1,FLT1,FOXM1,FOXO1,FRS2,HGF,HSPG2,IL24,IL6,IQGAP1,ITGA1,ITGA2,KDR,KIT,MAGI1,MAP2K6,MERTK,MTOR,MYOF,NCOA3,NF1,NOTCH1,NRP2,PFKFB3,PIK3C2A,PIK3C2B,PIK3CG,PLCG1,PLD1,PPARG,PPP1R16B,PRKD2,PRKDC,PTPRM,RCAN2,RGS5,RPTOR,SEMA6A,SLC38A5,SP1,SPEN,STAT1,STC1,TEK,TFAP2A,TGFBR2,TNFRSF12A,VIP,WWP2,WWTR1	63
Cancer	Cell transformation	2.30E-81	80.6383	2.27723e-80	79.6426	2.729	AASS,ABCA6,ABCC1,ABCG2,ABI1,ABR,ACACA,ACBD5,ACE,ACER2,ACVR2A,ADAMTS10,ADAMTS9,ADAR,ADARB1,ADCY9,ADGRA2,ADGRF5,ADORA3,ADRA1D,ADSS1,AFAP1L1,AFDN,AFF1,AGTPBP1,AHCTF1,AHCYL2,AHNAK2,AHR,AKAP13,AKAP9,ALDH2,AMIGO3,AMOT,ANKHD1-EIF4EBP3,ANKRD20A4P (includes others),ANKRD24,ANKRD28,ANKRD33,ANKRD36,ANKRD65,ANKS1A,ANO6,APAF1,APBA1,APCDD1,APOD,APP,AR,ARFGEF1,ARFGEF2,ARFGEF3,ARHGAP28,ARHGEF12,ARHGEF28,ARHGEF6,…	884
Cancer,Gastrointestinal Disease,Organismal Injury and Abnormalities	Pancreaticobiliary carcinoma	2.54E-48	47.5952	1.22705e-47	46.9111	2.727	ABCA3,ABCA6,ABCG2,ABI1,ABR,ACE,ACKR3,ACVR2A,ADAMTS10,ADAMTS9,ADAR,ADARB1,ADORA3,ADRA2A,AFDN,AFF1,AHCTF1,AHNAK2,AHR,AKAP13,AKAP9,AMOT,ANKHD1-EIF4EBP3,ANKRD20A4P (includes others),ANKRD24,ANKRD36,ANKS1A,ANO6,APAF1,APP,AR,ARFGEF2,ARHGEF12,ARHGEF6,ARID2,ARID4A,ARSL,ATG2A,ATP10A,ATP11A,ATP2B4,ATP7A,ATP7B,ATR,AXIN2,BACE2,BAZ2A,BAZ2B,BCL9,BFAR,BIRC6,BMAL1,BOC,BRCA2,BRME1,C22orf46P,C2orf81,C8orf82,CAMKK2…	453
Cancer,Gastrointestinal Disease,Organismal Injury and Abnormalities	Pancreatobiliary adenocarcinoma	6.88E-44	43.1624	3.07143e-43	42.5127	2.727	ABCA3,ABCG2,ABR,ACE,ACKR3,ACVR2A,ADAMTS10,ADAMTS9,ADAR,ADARB1,ADRA2A,AFDN,AFF1,AHCTF1,AHNAK2,AKAP13,AKAP9,AMOT,ANKHD1-EIF4EBP3,ANKRD20A4P (includes others),ANKRD24,ANKS1A,APAF1,APP,AR,ARFGEF2,ARHGEF12,ARHGEF6,ARID2,ARSL,ATP10A,ATP11A,ATP2B4,ATP7A,ATP7B,ATR,BACE2,BAZ2A,BAZ2B,BCL9,BFAR,BIRC6,BMAL1,BOC,BRCA2,BRME1,C22orf46P,C8orf82,CAMKK2,CARF,CBL,CC2D2A,CCDC180,CCDC88C,CCL5,CCN3,CCNB1IP1,CCR7,CD109…	395
Cellular Movement,Hematological System Development and Function,Immune Cell Trafficking	Migration of antigen presenting cells	3.48E-07	6.45842	3.67089e-07	6.43523	2.702	ABCC1,APP,AR,BMPR2,C1QL3,CCL5,CCR7,CD74,CMKLR1,CSF2RB,CX3CL1,DGKA,DOCK8,EPAS1,FLRT2,FLT1,HGF,IRF6,ITGA1,KDR,KIT,NRP2,PIK3CG,PLXNB1,PLXND1,RPTOR,SH2B3,STAT1,TNC,TNFSF9,TRPV1,VCAN,VIP	33
Cellular Assembly and Organization,Organismal Development,Tissue Development	Formation of filaments	2.09E-09	8.67985	2.97721e-09	8.52619	2.694	ACE,ADAMTS10,ADGRF5,AKAP13,AKAP9,AMOT,APP,AR,ARFGEF1,ARHGAP19,ARHGAP28,ARHGEF12,ARRB1,BMX,BRCA2,CDC14A,CDK5RAP2,CDK6,CEP20,CGNL1,CLIP3,CNTNAP1,CORO2B,CRACD,DAB2,FCHSD2,FOXM1,HDAC6,HGF,JMY,KDR,MAGI1,MAP3K1,MCF2L,MDM1,MTOR,MTSS1,MYO1C,NF1,NFATC1,NOTCH1,NPR1,PAK3,PIK3C2B,PIK3R2,PLD1,PLXNB1,PREX1,PRKAA2,PRKCH,PRKCQ,PRUNE1,PTPN11,PTPRB,ROCK2,SDC2,SKA1,SPHK1,TFAP2A,TGFBR2,TGFBR3,TJP1,TNC,TNS3,TSC1,TUBB…	68
Cell Morphology,Cellular Assembly and Organization,Cellular Development,Cellular Function and Maintenance,Cellular Growth and Proliferation,Nervous System Development and Function,Organismal Development,Tissue Development	Branching of neurons	3.67E-07	6.43533	3.8591e-07	6.41351	2.671	ABI1,AFDN,APBA1,APP,ASAP1,CAMKK2,CASK,CDKL5,CHN1,CPEB3,CRIP1,DCC,EIF4G3,EPHA4,FNBP1L,FOXO6,GPRIN3,HDAC6,HDAC9,HGF,IL6,IQSEC1,ITSN2,KALRN,KIF13B,LIFR,MT2A,MTOR,MTSS1,NCAM2,NEDD4L,NF1,NOTCH1,NRP2,NUAK1,PAK3,PALM,PKP4,PLD1,PRKN,RAPH1,RNF157,ROCK2,SDC2,SEMA6A,SHANK3,SLC12A5,SLC23A2,SMAD4,SYT1,TMOD1,TSC1,UBE3A,VIP,ZDHHC15,ZMYND8	56
Cell Death and Survival	Cell viability of cervical cancer cell lines	3.87E-07	6.41229	4.04812e-07	6.39275	2.666	ACER2,ACVR2A,ADK,AKAP13,ATP7B,ATR,BCL2L11,BRCA2,CASK,CDC42BPA,CDK6,CLU,DAXX,DGKA,DUSP14,EEF1B2,IER3,JAK1,MAP3K1,MED12,NKRF,PIK3R2,PPFIA3,PPP1R11,PPP1R16B,PRKACB,PRKCQ,PRKD2,PRKDC,PTPRCAP,PTPRM,RETSAT,SKA1,SP1,SPHK1,TGFBR2,WWTR1	37
Cardiovascular Disease,Organismal Injury and Abnormalities	Hypertrophy of heart	1.82E-08	7.73993	2.275e-08	7.64302	2.665	ACE,ADK,ADORA3,ADRA1D,ADRA2A,AHR,BMPR2,BMX,CDK7,CIB1,CMKLR1,CNOT3,DPP4,EP300,EPAS1,FLT1,FOXM1,FOXO1,GUCY1A1,HDAC9,HEY2,HGF,IER3,IGF2R,IL6,JARID2,KCNQ1,LAMA4,MAP2K6,MBNL1,MBNL2,MLIP,MTOR,NF1,NFATC1,NOTCH1,NPR1,NR3C2,PBX1,PBX2,PDE9A,PHC1,PIK3CG,PLCB1,PPARG,PRKAA2,PTPN11,RAB11FIP3,RCAN2,RGS5,ROCK2,RRAD,SHC1,SMAD4,SP1,STAT1,TGFBR3,VAV3,VIP	59
Hematological System Development and Function,Hematopoiesis,Lymphoid Tissue Structure and Development,Organ Morphology,Tissue Morphology	Quantity of thymocytes	4.36E-08	7.36051	5.20908e-08	7.28324	2.664	ADAR,AFF1,AHR,BCL2L11,CCR7,CDK6,CHD7,EFNB2,ELK4,EP300,EPHA4,ETS1,EZH2,FLI1,FOXO1,GLCCI1,IL6,IL7,INPP5D,ITPKB,JAK1,KIT,KLF13,KMT2E,LAT,MAML1,MARCHF8,MCF2L,NFATC1,NOTCH1,PIK3CG,PLXND1,PRKCH,PRKCQ,PRKDC,SATB1,TP53BP1,VAV3	38
Cancer,Organismal Injury and Abnormalities	Transformation of blood cells	7.68E-10	9.11464	1.17431e-09	8.93022	2.638	ANO6,ASAP1,CBL,CCN3,EBF1,EFR3A,EP300,FOXP1,GHR,IL7,INPP5D,JAK1,KDM2B,MECOM,NF1,OSBPL1A,PBX1,PIK3R2,RASGRF2,REL,SNX29,TNFSF9,ZBTB16	23
Cellular Assembly and Organization,Cellular Function and Maintenance	Organization of actin cytoskeleton	6.19E-07	6.20831	6.23992e-07	6.20482	2.637	ABR,ADRA2A,AMOT,ARRB1,ATE1,BCAS3,CCR7,CDC42BPA,CGNL1,CLU,CORO2B,DCC,EPHA4,FLNB,FMNL2,GHR,GPER1,HDAC6,HMCN1,IQGAP2,KALRN,KIT,LCP1,LPIN1,MRTFB,MTOR,MTSS1,NEDD9,NF1,PAK3,PAM,PTPN11,RDX,ROCK2,SCIN,SFRP1,SHC1,SHROOM2,SHROOM4,SPECC1L,SPTA1,SPTBN1,THSD7A,TJP1,VWF,ZBED3	46
Neurological Disease,Organismal Injury and Abnormalities	Seizure disorder	4.57E-09	8.34008	6.19241e-09	8.20814	2.635	ABCC1,ADARB1,ADCY9,ADK,ADRA1D,ADRA2A,ALDH2,APP,ARFGEF1,ARRDC3,ATP1A1,ATP6V1A,ATR,BCL2L11,BTBD8,CALCRL,CASK,CBL,CDK19,CDKL5,CELF2,CHN1,CIT,CLCN3,CLU,CORO2B,CRAMP1,DENND5A,DMXL2,EFHC1,EP300,EPM2A,FLT1,FOXP1,GABRP,GOLGA8K (includes others),HBP1,HDAC9,HECW2,HSPA1A,HTR1B,HTR1D,IL6,ITSN2,JMJD1C,KALRN,KCNIP1,KCNMB4,KMT2C,MACF1,MAST3,MAST4,MBNL2,MED23,MERTK,MT-ND6,MT2A,MTOR,NCDN,NEDD4L,NF1,NFIA,NID1,NOVA…	96
Cell-mediated Immune Response,Cellular Development,Cellular Function and Maintenance,Cellular Growth and Proliferation,Embryonic Development,Hematological System Development and Function,Hematopoiesis,Lymphoid Tissue Structure and Development,Organ Development,Organismal Development,Tissue Development	Differentiation of T lymphocytes	9.75E-08	7.011	1.1194e-07	6.95101	2.626	AFF1,AHR,APAF1,ARRB1,ATP7A,BCL2L11,BFAR,CBL,CCL5,CD74,CDK6,CHD7,EBF1,EFNB2,EPHA4,ETS1,EZH2,FOXO1,FOXP1,GATA2,HLA-DRB1,IGF2R,IL18R1,IL6,IL7,IRAK3,ITPKB,JAK1,KIT,KMT2A,LAT,LEF1,LTBP1,MERTK,MTOR,NFATC1,NOTCH1,PIK3CG,PIK3R2,PPARG,PRDM1,PREX1,PRKCQ,PRKDC,REL,RNF157,RORA,SATB1,SFRP1,SH2B3,STAT1,STAT2,STING1,TGFBR2,TNFSF4,TNFSF9,TRPV1,TSC1,VIP,ZBTB10,ZMIZ1,ZNF609	62
Cell Death and Survival	Cell viability of lymphatic system cells	9.10E-10	9.04096	1.37462e-09	8.86182	2.621	ADAR,ARRB1,BCL2L11,CBL,CD74,CHD4,CLEC11A,CLOCK,CLU,DOCK8,EBF1,FCMR,FOXP1,HGF,IL6,IL7,INPP5D,ITPKB,ITPR3,KIT,LAT,LEF1,MCF2L,MTOR,NOTCH1,PARP14,PIK3CG,PLXNB1,PRDM1,PRKCQ,PTPN11,REL,RPTOR,SMAD4,STAT1,TNFSF9,TSC1,TSC22D3,VIP	39
Cardiovascular System Development and Function,Organismal Development,Tissue Development	Morphogenesis of cardiovascular tissue	5.17E-07	6.28651	5.29713e-07	6.27596	2.613	EFNB2,FOXP1,HGF,ITGAX,KDR,MAGI1,MAP2K6,NOTCH1,PIK3C2A,PIK3C2B,PIK3CG,PRKD2,STC1,TFAP2A,TMOD1	15
Cellular Development,Cellular Growth and Proliferation,Hematological System Development and Function,Lymphoid Tissue Structure and Development	Proliferation of lymphocytes	7.34E-12	11.1343	1.35926e-11	10.8667	2.612	ABI1,ADK,AHR,AKAP13,ANO6,ARHGEF6,ATF6B,B3GNT5,BCL2L11,BCOR,CBL,CCL5,CCR7,CD74,CDK6,CFB,CHD4,CLEC11A,CSF2RB,DGKA,DOCK8,DPP4,DUSP14,EBF1,EFNB2,EP300,ETS1,FLI1,FOXO1,FOXP1,GAB2,GATA2,HLA-DPB1,HLA-DRB1,HSPA1A,IL24,IL6,IL7,INPP5D,IQGAP1,IRF6,ITGA2,ITGA2B,ITGAX,ITPR3,KDR,KIT,LAT,LCP1,LEF1,LPIN1,LTBP1,MAP2K6,MAP3K1,MARCHF8,MCF2L,MERTK,MTHFD2,MTOR,NCSTN,NF1,NFATC1,NOTCH1,NR5A2,NUP98,PARP14,PBX1,PIK3CG,PI…	110
Cancer,Organismal Injury and Abnormalities	Lymphoreticular neoplasm	8.77E-65	64.057	5.73203e-64	63.2417	2.606	AASS,ABCA6,ABCC1,ABCG2,ABI1,ACACA,ACBD5,ACE,ACER2,ADAMTS9,ADAR,ADARB1,ADGRA2,ADGRF5,ADORA3,ADRA1D,ADSS1,AFAP1L1,AFDN,AHCYL2,AHNAK2,AHR,AKAP13,AKAP9,ALDH2,AMIGO3,AMOT,ANKHD1-EIF4EBP3,ANKRD20A4P (includes others),ANKRD24,ANKRD28,ANKRD33,ANKRD36,APAF1,APBA1,APCDD1,APP,AR,ARFGEF1,ARFGEF3,ARHGAP28,ARHGEF28,ARHGEF6,ARID2,ARID4A,ARRB1,ARSL,ASAP2,ATF6B,ATF7,ATL1,ATP10A,ATP11A,ATP13A3,ATP2B4,ATP6V1A,ATP7A…	589
Cardiovascular Disease,Hereditary Disorder,Organismal Injury and Abnormalities	Familial cardiovascular disease	8.98E-14	13.0467	1.9188e-13	12.717	2.601	ABCA3,ABI1,ACE,ACVR2A,AFF1,AKAP9,APOLD1,APP,ATE1,ATP13A3,ATR,BCL9,BMPR2,CBLN1,CCL5,CFB,CYSLTR1,DCHS1,DPP4,EDNRB,ETS1,F8,FAT4,FLT1,FMO5,FOXP1,GHR,GUCY1A1,HEY2,HSPG2,IFIH1,IGF2R,IL6,ITPR3,JAK1,JAM2,JAM3,JPH2,KALRN,KCNJ12,KCNJ5,KCNQ1,KDR,KLF12,KLF13,KLHL24,KLHL3,LAMA4,LAMC1,LPL,LTBP1,MED12,MRTFB,MT-CO1,MT-ND6,MTHFD2,MTOR,MYO6,MYORG,NF1,NFATC1,NOTCH1,NR3C2,OPRL1,PBX1,PBX2,PDE11A,PIK3R2,PLXND1,PPARG,P…	96
Developmental Disorder,Organismal Injury and Abnormalities	Disorder of stature	7.90E-08	7.10237	9.18605e-08	7.03687	2.595	ALDH2,ARSL,ATP1A1,ATR,BRCA2,CEP120,CEP295,CIT,COL9A3,CSGALNACT1,DYNC2H1,EXOC6B,FLNB,GHR,HAPLN1,HDAC6,HIP1,HSPG2,IFT172,IGF2R,IL6,IQSEC1,ITGA2,KCNQ1,KIF24,MAP2K6,MED12,MRPL23,NBAS,NCDN,NFIB,NSD1,OFD1,PCDH12,POLA1,PTPN11,RALGAPB,RP1L1,RTTN,SCN4A,SHISA2,SMAD4,TAF1,TOP2B,TRPS1,WWP2	46
Inflammatory Response,Organismal Injury and Abnormalities	Inflammation of body cavity	9.84E-09	8.007	1.27461e-08	7.89462	2.574	ABCG2,ACE,ACKR3,ACVR2A,ADK,ADORA3,ADRA1D,ADRA2A,AHR,ALDH2,APCDD1,APOD,AR,ASAP1,ATF7,BCL2L11,BRME1,CALCRL,CBL,CCDC80,CCL5,CCR7,CD177,CD74,CEACAM21,CFB,CHD4,CHD7,CHRNA7,CIT,CLEC16A,CLU,CMKLR1,COL7A1,CSF2RB,CX3CL1,CYP1A1,CYSLTR1,DERL3,DNAJC16,DPP4,EBF1,EDNRB,EHMT2,EP300,EPAS1,EPS15,ETS1,EZH2,F8,FLI1,FLT1,FMO5,FOXO1,FOXP1,FRRS1,GABRP,GATA2,GHR,GNMT,GPANK1,GPER1,HDAC9,HERC2,HGF,HLA-DPB1,IDE,IFIH1,IGFB…	183
Infectious Diseases,Organismal Injury and Abnormalities	Infection by coronavirus	1.72E-16	15.7645	4.25743e-16	15.3709	2.553	ACE,ADAR,ADRA2A,AFDN,AHNAK2,AHR,ALDH2,APOD,AR,ARFGEF1,ARFGEF3,ARHGAP27,ATP10A,ATP11A,ATP13A3,ATP1A1,BAZ2B,BMAL1,BMX,CALCRL,CC2D2A,CCL5,CD74,CDK6,CECR2,CELF2,CFB,CHRFAM7A,CHRNA7,CIB1,CIT,CLU,CRACD,CSF2RB,CSGALNACT1,CSMD2,CYP1A1,CYSLTR1,DAB2,DACH1,DCC,DDIAS,DOCK8,DOP1B,DPP4,DYNC2H1,DYSF,EIF4G3,ETS1,F8,FLNB,FRAS1,FYCO1,GALNT18,GPC5,GSE1,HBP1,HERC1,HIP1,HIVEP1,HLA-C,HLA-DPB1,HLA-DRB1,HLA-F,HSPA1A,IFI…	170
Cell-To-Cell Signaling and Interaction,Cellular Movement	Recruitment of cells	1.79E-08	7.74715	2.2403e-08	7.64969	2.553	ADORA3,AHR,APP,CCL23,CCL5,CCR7,CD74,CD93,CLU,CMKLR1,CSF2RB,CX3CL1,CYP1A1,DPP4,EFNB2,EPAS1,ETS1,FLT1,GAB2,GLCE,HEY2,HGF,HSPA1A,IL6,IL7,INPP5D,IRF6,KDR,MAML1,MTOR,NEDD4L,NEIL2,NOTCH1,PIK3CG,PPARG,PREX1,PRKCQ,PTGDR2,PXDN,SFRP1,SHC1,SLC7A8,SMAD4,ST3GAL6,STAT1,STIM1,STING1,TEK,TGFBR2,TJP1,TNC,TRAF1,VAV3,VCAN,VIM,VIP,VWF,WWTR1	58
Cancer,Gastrointestinal Disease,Hepatic System Disease,Organismal Injury and Abnormalities	Hepatobiliary adenocarcinoma	9.84E-11	10.007	1.67063e-10	9.77712	2.55	ACE,ADAMTS9,AFDN,AHNAK2,AHR,AKAP13,ANKRD20A4P (includes others),ANKS1A,AR,ARID2,ATP10A,ATP7A,ATR,BRCA2,CAMKK2,CC2D2A,CD34,CDK6,CEP162,CEP290,CHURC1-FNTB,CPEB4,CX3CL1,DCC,DDIT4L,DENND4C,DMXL2,DNAJC16,DOCK6,DOCK8,DYNC2H1,EOGT,FAT4,FLNB,FLT1,GIGYF2,GNA14,GOLGA8K (includes others),GPER1,HDAC6,HERC2,HLA-C,HLA-DPB1,HMGCS1,IL6,IQSEC1,ITPR3,JAK1,KCNJ12,KDM3B,KDR,KIT,KLF11,KMT2A,KMT2C,KRT7,LRCH2,MACF1,MAM…	104
Cardiovascular Disease,Organismal Injury and Abnormalities	Failure of heart	1.90E-08	7.72125	2.36025e-08	7.62704	2.54	ACE,ADAR,ADRA1D,ADRA2A,AKAP9,AR,ATP1A1,CD74,CDK6,CDS2,DERL3,DPP4,EP300,FLT1,FOXN3,GAB2,GABRP,GHR,GTF2I,GUCY1A1,HEATR5B,HEY2,IGF2R,IL6,JPH2,KAT2B,KCNJ12,KCNJ5,KCNQ1,KIFAP3,KLHL3,MAP3K1,MLIP,MTOR,MYO1C,MYO6,NEDD4L,NFIA,NPR1,NPR3,NR3C2,PDE11A,PDE4C,PDE7B,PDE9A,PIK3CG,PPARG,RRAD,SBF2,SCN3B,SCNN1B,SCNN1G,SLC12A5,STAB2,TNC,TUBB,VWF,ZBTB16	58
Cardiovascular Disease,Organismal Injury and Abnormalities	Disorder of blood pressure	1.19E-19	18.9245	3.39031e-19	18.4698	2.535	ABCG2,ACE,ADCY9,ADGRF5,ADK,ADORA3,ADRA1D,ADRA2A,AHR,ALDH2,APOLD1,AR,ARHGEF12,ATP13A3,ATP1A1,ATP2B4,ATP6V1A,AXIN2,BCAS3,BMAL1,BMPR2,BRME1,CBLN1,CCDC80,CCDC88C,CCL5,CD34,CDK6,CEP170,CHM,CHRNA7,CMKLR1,COQ10A,CPEB4,CTDSPL,CX3CL1,DCC,DCHS1,DENND11,DENND5A,DOCK6,DYNC2H1,EBF1,EDNRB,EML6,EPAS1,F8,FAM171B,FANCB,FLNB,FLT1,FOXO1,FOXP1,FST,FZD4,GALNT18,GFOD1,GSE1,GTF2I,GUCY1A1,HDAC9,HMGCS1,HRCT1,IER3,IGFBP5,…	182
Cell Death and Survival,Organismal Injury and Abnormalities	Cell death of tumor cell lines	2.09E-15	14.6799	4.89461e-15	14.3103	2.535	ABCA3,ABCB7,ABCC1,ABCG2,ACACA,ACER2,ACKR3,ADAR,AHR,APAF1,APP,AR,ARHGEF6,ARID2,ATG2A,ATP1A1,ATR,AXIN2,BCL2L11,BCOR,BIRC6,BMPR2,BMX,BRCA2,CAMKK2,CAST,CBL,CCDC80,CD74,CDK6,CDK7,CDON,CELF1,CELF2,CGNL1,CHD4,CIB1,CLIP3,CLU,CNOT3,CSF2RB,CUL9,DAB2,DAXX,DCC,DOCK8,DOCK9,DOP1B,DPP4,DROSHA,EBF1,EEF1B2,EHMT2,EP300,EPAS1,EPM2A,ERN1,ETS1,EXOC6B,EZH2,FANCM,FBXO25,FCHSD2,FCMR,FIP1L1,FLNB,FLT1,FOXM1,FOXO1,FOXP1,FS…	259
Cellular Movement	Cell movement of myeloid cells	1.51E-08	7.82102	1.90176e-08	7.72084	2.525	ADAR,ANO6,APP,AR,ARRB1,BMPR2,C1QL3,CAST,CCL23,CCL5,CCN3,CCR7,CD177,CD74,CFB,CIB1,CLEC11A,CMKLR1,CX3CL1,DGKA,DOCK8,DPP4,DYSF,EDNRB,EPAS1,ERN1,FAM171B,FLRT2,FLT1,FOXO6,GATA2,HGF,IFIH1,IL24,IL6,IL7,INPP5D,IRAK3,IRF6,ITGA1,ITGA6,ITGAX,JAK1,JAM3,KDR,KIT,LCP1,LYST,MERTK,MTOR,NF1,NOTCH1,NPR1,NR3C2,PARG,PFKFB3,PIK3CG,PLD1,PLXND1,POMC,PPARG,PRDM1,PREX1,PRKCQ,PSMB8,PTGDR2,PTPN11,PTPRB,REL,RGS5,ROCK2,RORA,R…	91
Cellular Assembly and Organization,Cellular Function and Maintenance,Organismal Development,Tissue Development	Formation of actin filaments	5.02E-07	6.2993	5.1593e-07	6.28741	2.516	ADGRF5,AKAP13,AMOT,AR,ARFGEF1,ARHGAP19,ARHGAP28,ARHGEF12,ARRB1,BMX,CDC14A,CDK6,CGNL1,CNTNAP1,CORO2B,CRACD,DAB2,FCHSD2,HDAC6,HGF,KDR,MAGI1,MAP3K1,MCF2L,MTOR,MTSS1,MYO1C,NF1,NFATC1,NOTCH1,NPR1,PAK3,PIK3C2B,PIK3R2,PLD1,PLXNB1,PREX1,PRKCQ,PTPN11,PTPRB,ROCK2,SDC2,SPHK1,TGFBR2,TJP1,TNC,TNS3,TSC1	48
Cell Death and Survival,Organismal Injury and Abnormalities	Necrosis	6.52E-23	22.1858	2.00615e-22	21.6976	2.488	ABCA3,ABCB7,ABCC1,ABCG2,ACACA,ACE,ACER2,ACKR3,ADAR,ADARB1,ADK,ADORA3,ADRA1D,AFDN,AGTPBP1,AHR,ALDH2,APAF1,APP,AR,ARHGEF6,ARID2,ARRB1,ARSG,ATF7,ATG2A,ATP1A1,ATP2B4,ATP6V1G2,ATP7A,ATP7B,ATR,AXIN2,BCL2L11,BCOR,BIRC6,BMPR2,BMX,BRCA2,CALCRL,CAMKK2,CASK,CAST,CBL,CCDC80,CCL5,CCN3,CCR7,CD74,CDK6,CDK7,CDON,CELF1,CELF2,CEP120,CFB,CGNL1,CHD4,CIB1,CIT,CLEC11A,CLIP3,CLOCK,CLU,CMKLR1,CNOT3,CPEB3,CPEB4,CRLF1,CSF…	393
Cell-To-Cell Signaling and Interaction	Immune response of myeloid cells	5.14E-07	6.28904	5.27179e-07	6.27804	2.467	ABI1,ACE,ADAR,APP,ATAT1,ATP1A1,CD93,CFB,CHN1,CLCN3,CSF2RB,CX3CL1,DOCK8,ERN1,FCMR,FLRT2,GAB2,HGF,IL6,INPP5D,IQGAP1,JAK1,MACF1,MBNL1,MERTK,MTOR,NF1,PFKFB3,PIK3CG,PPARG,PRKD2,RORA,RPTOR,SLC7A8,SPHK1,STAB2,STAT1,STIM1,SUPT20H,USP22,VIP,ZMYND8	42
Lymphoid Tissue Structure and Development,Organ Morphology,Tissue Morphology	Quantity of thymus gland	3.20E-09	8.49485	4.46304e-09	8.35037	2.466	ADAR,AFF1,AHR,BCL2L11,CCR7,CDK6,CHD7,EFNB2,ELK4,EP300,EPHA4,ETS1,EZH2,FLI1,FOXO1,GLCCI1,IL6,IL7,INPP5D,ITPKB,JAK1,KIT,KLF13,KMT2E,LAT,MAML1,MARCHF8,MCF2L,NFATC1,NOTCH1,PIK3CG,PLXND1,PRKCH,PRKCQ,PRKDC,RPTOR,SATB1,STAT1,TP53BP1,TSC1,VAV3	41
Cellular Assembly and Organization	Development of cytoplasm	1.25E-10	9.90309	2.08681e-10	9.68052	2.462	ADGRF5,AKAP13,AKAP9,AMOT,APP,AR,ARFGEF1,ARHGAP19,ARHGAP28,ARHGEF12,ARRB1,ATG2A,BMX,CBL,CD74,CDC14A,CDK5RAP2,CDK6,CEP20,CGNL1,CLIP3,CNTNAP1,CORO2B,CRACD,DAB2,DGKA,EIF6,EPM2A,FCHSD2,FOXM1,FOXO1,HDAC6,HGF,HIP1,HPS1,HPS3,HPS5,IGF2R,KDR,MAGI1,MAP3K1,MCF2L,MTOR,MTSS1,MYO1C,NCOA3,NF1,NFATC1,NOTCH1,NPR1,NRIP1,PAK3,PAM,PIK3C2B,PIK3R2,PLD1,PLXNB1,PPARG,PREX1,PRKCH,PRKCQ,PRUNE1,PTPN11,PTPRB,ROCK2,SDC2,SKA1,…	81
Cell-To-Cell Signaling and Interaction	Response of myeloid cells	2.01E-07	6.6968	2.19912e-07	6.65775	2.457	ABI1,ACE,ADAR,APP,ATAT1,ATP1A1,ATP7A,CD93,CFB,CHN1,CLCN3,CSF2RB,CX3CL1,DOCK8,ERN1,FCMR,FLRT2,GAB2,HGF,IL6,INPP5D,IQGAP1,ITGAX,JAK1,MACF1,MBNL1,MERTK,MTOR,NF1,PFKFB3,PIK3CG,PLCB4,PPARG,PRKD2,RORA,RPTOR,SHC1,SLC7A8,SPHK1,STAB2,STAT1,STIM1,SUPT20H,USP22,VIP,ZMYND8	46
Cellular Movement,Immune Cell Trafficking	Leukocyte migration	4.25E-12	11.3716	7.97373e-12	11.0983	2.449	ABCC1,ACKR3,ADAR,ADORA3,AHR,ANO6,APOD,APP,AR,ARHGEF6,ARRB1,BCL9,BMPR2,C1QL3,CAST,CBL,CCL23,CCL5,CCN3,CCR7,CD177,CD34,CD74,CD93,CFB,CIB1,CLEC11A,CLU,CMKLR1,CSF2RB,CX3CL1,CYP1A1,CYSLTR1,DGKA,DOCK8,DPP4,DYSF,EDNRB,EFNB2,EPAS1,ERN1,ETS1,FAM171B,FLRT2,FLT1,FOXM1,FOXO1,FOXO6,FOXP1,GAB2,GATA2,HDAC6,HGF,HSPA1A,IFIH1,IL24,IL6,IL7,INPP5D,IRAK3,IRF6,ITGA1,ITGA2,ITGA2B,ITGA6,ITGAX,ITGB4,JAK1,JAM2,JAM3,KDR,KI…	143
Developmental Disorder,Organismal Injury and Abnormalities	Abnormal morphology of vitelline vessel	5.63E-07	6.24949	5.72737e-07	6.24205	2.449	ABI1,AMOT,ARHGEF12,BMPR2,E2F8,EFNB2,EP300,EPS15,GATA2,MECOM,NCSTN,NOTCH1,PAM,PLPP3,SETD2,SHC1,SPTBN1,TEK,TGFBR2,UBR4,ZMIZ1	21
Organismal Injury and Abnormalities	Non-malignant disorder	1.01E-35	34.9957	4.05622e-35	34.3919	2.442	ABCC1,ABCG2,ACE,ACKR3,ACVR2A,ADAMTS10,ADARB1,ADRA1D,ADRA2A,ADSS1,AFDN,AFF1,AHNAK2,AHR,ALDH2,APCDD1,APOD,APOLD1,APP,AR,ARFGEF1,ARFGEF2,ARID2,ARID4A,ARSL,ATG2A,ATP1A1,ATP7B,ATR,AXIN2,BACE2,BAZ2A,BCL9,BCOR,BDH1,BIRC6,BMAL2,BMPR2,BOC,BRCA2,BTBD3,C2CD2,CALCRL,CAND2,CAST,CAVIN2,CBL,CCDC150,CCDC180,CCDC80,CCL23,CCL5,CCN3,CCR7,CD109,CD177,CD34,CD74,CELF2,CEP290,CFB,CHD6,CHRNA7,CIT,CLEC11A,CLEC16A,CLOCK,C…	379
Hematological System Development and Function,Lymphoid Tissue Structure and Development,Tissue Morphology	Quantity of T lymphocytes	2.25E-11	10.6478	4.02504e-11	10.3952	2.441	ABCG2,ACACA,ADAR,AFF1,AHR,APP,ARHGEF6,ARID4A,BCL2L11,CAMKK2,CBL,CCL5,CCR7,CD74,CDK6,CHD7,CMKLR1,CSF2RB,CYP1A1,DGKA,DOCK8,EFNB2,ELK4,EP300,EPHA4,ETS1,EZH2,FCMR,FLI1,FOXO1,GAB2,GHR,GLCCI1,HLA-DRB1,IGF2R,IL6,IL7,INPP5D,IRAK3,ITGA6,ITPKB,JAK1,KIT,KLF12,KLF13,KMT2E,LAT,MAML1,MARCHF8,MCF2L,MERTK,MT2A,NF1,NFATC1,NLRC5,NOTCH1,NPR1,NR3C2,NUP98,PBX1,PIK3CG,PLXND1,PPARG,PRDM1,PRKACB,PRKCH,PRKCQ,PRKDC,PRKN,P…	95
Cardiovascular Disease,Organismal Injury and Abnormalities	Enlargement of right ventricle	5.44E-08	7.2644	6.43787e-08	7.19126	2.439	ACKR3,BMPR2,EPAS1,FOXO1,GUCY1A1,HDAC9,HEY2,HIF3A,IGF2R,IL6,NPR1,NR3C2,PBX1,PBX2,PHC1,VIP	16
Cardiovascular Disease,Organismal Injury and Abnormalities	Abnormal morphology of right ventricle	1.88E-07	6.72584	2.06821e-07	6.68441	2.439	ACKR3,BMPR2,EPAS1,ETS1,FOXO1,GUCY1A1,HDAC9,HEY2,HIF3A,HSPG2,IGF2R,IL6,NPR1,NR3C2,PBX1,PBX2,PHC1,VIP	18
Cancer,Gastrointestinal Disease,Organismal Injury and Abnormalities	Pancreaticobiliary neoplasm	5.24E-49	48.2807	2.64646e-48	47.5773	2.436	ABCA3,ABCA6,ABCG2,ABI1,ABR,ACBD5,ACE,ACKR3,ACVR2A,ADAMTS10,ADAMTS9,ADAR,ADARB1,ADCY9,ADGRA2,ADORA3,ADRA2A,AFDN,AFF1,AHCTF1,AHNAK2,AHR,AKAP13,AKAP9,AMOT,ANKHD1-EIF4EBP3,ANKRD20A4P (includes others),ANKRD24,ANKRD36,ANKS1A,ANO6,APAF1,APP,AR,ARFGEF2,ARHGAP28,ARHGEF12,ARHGEF6,ARID2,ARID4A,ARSL,ATG2A,ATP10A,ATP11A,ATP2B4,ATP7A,ATP7B,ATR,AXIN2,BACE2,BAZ2A,BAZ2B,BCL2L11,BCL9,BEND4,BFAR,BIRC6,BMAL1,BMPR2,…	500
Embryonic Development,Organismal Development,Tissue Development	Development of yolk sac	6.35E-07	6.19723	6.38833e-07	6.19461	2.425	ADRA2A,ARHGEF12,EFNB2,FOXO1,GATA2,KDR,NRP2,PTPN11,PTPRB,TMOD1	10
Cancer,Hematological Disease,Organismal Injury and Abnormalities	Hematologic cancer	4.14E-67	66.383	3e-66	65.5229	2.418	AASS,ABCA6,ABCC1,ABCG2,ACACA,ACBD5,ACE,ACER2,ADAMTS9,ADAR,ADARB1,ADGRA2,ADGRF5,ADK,ADORA3,ADRA1D,ADSS1,AFAP1L1,AFDN,AFF1,AGTPBP1,AHCTF1,AHCYL2,AHNAK2,AHR,AKAP13,AKAP9,ALDH2,AMIGO3,AMOT,ANKHD1-EIF4EBP3,ANKRD20A4P (includes others),ANKRD24,ANKRD28,ANKRD33,ANKRD36,ANKS1A,APAF1,APBA1,APCDD1,APP,AR,ARFGEF1,ARFGEF3,ARHGAP27,ARHGAP28,ARHGEF28,ARHGEF6,ARID2,ARID4A,ARRB1,ARSL,ASAP2,ATF6B,ATF7,ATL1,ATP10A,…	686
Cancer,Organismal Injury and Abnormalities	Lymphohematopoietic cancer	4.36E-67	66.3605	3.13669e-66	65.5035	2.418	AASS,ABCA6,ABCC1,ABCG2,ACACA,ACBD5,ACE,ACER2,ADAMTS9,ADAR,ADARB1,ADGRA2,ADGRF5,ADK,ADORA3,ADRA1D,ADSS1,AFAP1L1,AFDN,AFF1,AGTPBP1,AHCTF1,AHCYL2,AHNAK2,AHR,AKAP13,AKAP9,ALDH2,AMIGO3,AMOT,ANKHD1-EIF4EBP3,ANKRD20A4P (includes others),ANKRD24,ANKRD28,ANKRD33,ANKRD36,ANKS1A,APAF1,APBA1,APCDD1,APP,AR,ARFGEF1,ARFGEF3,ARHGAP27,ARHGAP28,ARHGEF28,ARHGEF6,ARID2,ARID4A,ARRB1,ARSL,ASAP2,ATF6B,ATF7,ATL1,ATP10A,…	687
Cell Death and Survival,Organismal Injury and Abnormalities	Cell viability of mononuclear leukocytes	6.04E-10	9.21896	9.36434e-10	9.02852	2.391	ARRB1,BCL2L11,CBL,CD74,CHD4,CLEC11A,CLOCK,CLU,DOCK8,EBF1,FCMR,FOXP1,GAB2,HGF,IL6,IL7,INPP5D,ITPKB,ITPR3,KIT,LAT,LEF1,MCF2L,MTOR,NOTCH1,PARP14,PIK3CG,PLXNB1,PRDM1,PRKCQ,REL,RPTOR,SMAD4,STAT1,TNFSF9,TSC1,TSC22D3,VIP	38
Connective Tissue Disorders,Hereditary Disorder,Organismal Injury and Abnormalities	Hereditary connective tissue disorder	4.01E-11	10.3969	6.98606e-11	10.1558	2.39	ABCA3,ACE,ACVR2A,ADAMTS10,ADARB1,ADRA2A,AFF1,ALDH2,ARSL,ATP6V1A,ATP7A,ATR,BACE2,BMPR2,CASK,CBL,CCL5,CDK5RAP2,CDK6,CDON,CEP120,CEP295,CIT,CLU,CNTNAP1,COL7A1,COL9A3,DCC,DYNC2H1,EP300,EPAS1,ERC1,ETS1,EXOC6B,FLNB,FST,GAB2,GHR,GPER1,HDAC6,HECW2,HERC1,HIP1,HSPG2,IFIH1,IFT172,IL6,INHBB,IRF6,IRX5,ITGA6,ITGB4,JMJD1C,KIF24,KIT,KLHL24,LIFR,LTBP1,MECOM,MED12,MTOR,MYO6,NEK9,NF1,NFATC1,NFIB,NIPBL,NOTCH1,NSD1,O…	108
Cancer,Organismal Injury and Abnormalities	Ductal neoplasm	1.69E-62	61.7721	1.06289e-61	60.9735	2.383	AASS,ABCA3,ABCA6,ABCG2,ABI1,ABR,ACE,ACKR3,ACVR2A,ADAMTS10,ADAMTS9,ADAR,ADARB1,ADCK1,ADRA2A,AFDN,AFF1,AHCTF1,AHNAK2,AKAP13,AKAP9,ALDH2,AMOT,ANKHD1-EIF4EBP3,ANKRD24,ANKRD36,ANKS1A,ANO6,APAF1,APP,AR,ARFGEF1,ARFGEF2,ARHGEF12,ARHGEF6,ARID2,ARID4A,ARRB1,ARSL,ATG2A,ATP10A,ATP11A,ATP2B4,ATP7A,ATP7B,ATR,AXIN2,BACE2,BAZ2A,BAZ2B,BCL9,BCOR,BFAR,BIRC6,BMAL1,BMAL2,BMPR2,BMX,BOC,BRCA2,BRME1,C22orf46P,C2orf81,C8…	513
Cancer,Organismal Injury and Abnormalities	Ductal carcinoma	3.78E-62	61.4225	2.34783e-61	60.6293	2.383	AASS,ABCA3,ABCA6,ABCG2,ABI1,ABR,ACE,ACKR3,ACVR2A,ADAMTS10,ADAMTS9,ADAR,ADARB1,ADCK1,ADRA2A,AFDN,AFF1,AHCTF1,AHNAK2,AKAP13,AKAP9,ALDH2,AMOT,ANKHD1-EIF4EBP3,ANKRD24,ANKRD36,ANKS1A,ANO6,APAF1,APP,AR,ARFGEF1,ARFGEF2,ARHGEF12,ARHGEF6,ARID2,ARID4A,ARRB1,ARSL,ATG2A,ATP10A,ATP11A,ATP2B4,ATP7A,ATP7B,ATR,AXIN2,BACE2,BAZ2A,BAZ2B,BCL9,BCOR,BFAR,BIRC6,BMAL1,BMAL2,BMPR2,BMX,BOC,BRCA2,BRME1,C22orf46P,C2orf81,C8…	512
Cancer,Organismal Injury and Abnormalities	Ductal adenocarcinoma	1.03E-57	56.9872	6.13095e-57	56.2125	2.383	AASS,ABCA3,ABCG2,ABR,ACE,ACKR3,ACVR2A,ADAMTS10,ADAMTS9,ADAR,ADARB1,ADCK1,ADRA2A,AFDN,AFF1,AHCTF1,AHNAK2,AKAP13,AKAP9,ALDH2,AMOT,ANKHD1-EIF4EBP3,ANKRD24,ANKRD36,ANKS1A,APAF1,APP,AR,ARFGEF1,ARFGEF2,ARHGEF12,ARHGEF6,ARID2,ARRB1,ARSL,ATG2A,ATP10A,ATP11A,ATP2B4,ATP7A,ATP7B,ATR,AXIN2,BACE2,BAZ2A,BAZ2B,BCL9,BCOR,BFAR,BIRC6,BMAL1,BMAL2,BMPR2,BMX,BOC,BRCA2,BRME1,C22orf46P,C8orf82,CAMKK2,CARF,CASK,CBL,CC2D…	475
Cardiovascular Disease,Organismal Injury and Abnormalities	Abnormality of left ventricle	1.21E-07	6.91721	1.36723e-07	6.86416	2.377	ACE,ACKR3,ADORA3,ADRA1D,ADRA2A,APOD,ATAT1,BMX,CAST,CBL,CCR7,CEP192,CHD4,CLU,DPP4,DYSF,EP300,ETS1,FLT1,FOXM1,GABRP,GLCE,HAPLN1,HDAC9,HEY2,HGF,HSPG2,IER3,IGF2R,IL6,ITGA2B,ITGB4,ITGBL1,JPH2,KDR,KRT7,LAMA4,MAP3K1,MBNL1,MBNL2,MECOM,MT-CO1,MT-CO2,MTOR,NOTCH1,NPR1,NR3C2,OAS3,PBX1,PBX2,PDE11A,PDE9A,PHC1,PHF8,PRKAA2,PRND,PTPN11,RGS12,SDC2,SEMA6A,SHC1,SPHK1,SPTA1,SPTBN1,TGFBR2,TNC,TUBB,UTRN,VAV3,VCAN,VIM	71
Cardiovascular Disease,Organismal Injury and Abnormalities	Left ventricular heart disease	4.79E-07	6.31966	4.94324e-07	6.30599	2.377	ACE,ACKR3,ADORA3,ADRA1D,ADRA2A,APOD,ATAT1,BMX,CAST,CBL,CCR7,CEP192,CHD4,CLU,DPP4,DYSF,EP300,ETS1,FLT1,FOXM1,GABRP,GLCE,HAPLN1,HDAC9,HEY2,HGF,HSPG2,IER3,IGF2R,IL6,ITGA2B,ITGB4,ITGBL1,JPH2,KDR,KRT7,LAMA4,MAP3K1,MBNL1,MBNL2,MTOR,NOTCH1,NPR1,NR3C2,OAS3,PBX1,PBX2,PDE11A,PDE9A,PHC1,PHF8,PRKAA2,PRND,PTPN11,RBFOX2,RGS12,SDC2,SEMA6A,SHC1,SPHK1,SPTA1,SPTBN1,TGFBR2,TNC,TUBB,UTRN,VAV3,VCAN,VIM	69
Cellular Movement,Hematological System Development and Function,Immune Cell Trafficking	Cell movement of leukocytes	2.03E-10	9.6925	3.30081e-10	9.48138	2.368	ABCC1,ACKR3,ADAR,ADORA3,AHR,ANO6,APOD,APP,AR,ARRB1,BCL9,BMPR2,C1QL3,CAST,CCL23,CCL5,CCN3,CCR7,CD177,CD74,CD93,CFB,CLEC11A,CMKLR1,CSF2RB,CX3CL1,CYSLTR1,DGKA,DOCK8,DPP4,DYSF,EDNRB,EFNB2,EPAS1,ERN1,ETS1,FAM171B,FLRT2,FLT1,FOXM1,FOXO1,FOXO6,FOXP1,GATA2,HDAC6,HGF,IFIH1,IL24,IL6,IL7,INPP5D,IRAK3,IRF6,ITGA1,ITGA2,ITGA6,ITGAX,ITGB4,JAK1,JAM2,JAM3,KDR,KIT,KMT2C,LAMA4,LAT,LCP1,LYST,MAML1,MERTK,MTOR,NEDD9,N…	127
Cancer,Gastrointestinal Disease,Hepatic System Disease,Organismal Injury and Abnormalities	Biliary tract carcinoma	1.10E-15	14.9586	2.60664e-15	14.5839	2.36	ABCA6,ABI1,ACE,ACVR2A,ADAMTS9,AFDN,AHNAK2,AKAP13,ANKRD20A4P (includes others),ANKRD36,ANKS1A,ANO6,AR,ARID2,ARID4A,ATP10A,ATP7A,ATR,BRCA2,C2orf81,CAMKK2,CC2D2A,CD34,CDC14A,CDK6,CEP162,CEP290,CHD4,CHN1,CHURC1-FNTB,CPEB4,CSDE1,CUL9,CX3CL1,DCC,DDIT4L,DENND4C,DMXL2,DNAJC16,DOCK6,DOCK8,DROSHA,DTX4,DYNC2H1,EBF1,ELK4,EOGT,ETV1,FAT4,FLNB,FLT1,GEN1,GIGYF2,GNA14,GOLGA8K (includes others),GPER1,HDAC6,HERC2,H…	165
Cancer,Gastrointestinal Disease,Hepatic System Disease,Organismal Injury and Abnormalities	Biliary tract tumor	1.81E-14	13.7423	4.07658e-14	13.3897	2.36	ABCA6,ABI1,ACE,ACVR2A,ADAMTS9,AFDN,AHNAK2,AKAP13,ANKRD20A4P (includes others),ANKRD36,ANKS1A,ANO6,AR,ARID2,ARID4A,ATP10A,ATP7A,ATR,BRCA2,C2orf81,CAMKK2,CC2D2A,CD34,CDC14A,CDK6,CEP162,CEP290,CHD4,CHN1,CHURC1-FNTB,CPEB4,CSDE1,CUL9,CX3CL1,CYP1A1,DCC,DDIT4L,DENND4C,DMXL2,DNAJC16,DOCK6,DOCK8,DROSHA,DTX4,DYNC2H1,EBF1,ELK4,EOGT,ETV1,FAT4,FLNB,FLT1,GEN1,GIGYF2,GNA14,GOLGA8K (includes others),GPER1,HDAC6,…	168
Cancer,Gastrointestinal Disease,Hepatic System Disease,Organismal Injury and Abnormalities	Biliary tract cancer	2.99E-14	13.5243	6.64444e-14	13.1775	2.36	ABCA6,ABI1,ACE,ACVR2A,ADAMTS9,AFDN,AHNAK2,AKAP13,ANKRD20A4P (includes others),ANKRD36,ANKS1A,ANO6,AR,ARID2,ARID4A,ATP10A,ATP7A,ATR,BRCA2,C2orf81,CAMKK2,CC2D2A,CD34,CDC14A,CDK6,CEP162,CEP290,CHD4,CHN1,CHURC1-FNTB,CPEB4,CSDE1,CUL9,CX3CL1,CYP1A1,DCC,DDIT4L,DENND4C,DMXL2,DNAJC16,DOCK6,DOCK8,DROSHA,DTX4,DYNC2H1,EBF1,ELK4,EOGT,ETV1,FAT4,FLNB,FLT1,GEN1,GIGYF2,GNA14,GOLGA8K (includes others),GPER1,HDAC6,…	167
Cancer,Gastrointestinal Disease,Hepatic System Disease,Organismal Injury and Abnormalities	Biliary tract adenocarcinoma	1.74E-10	9.75945	2.84314e-10	9.5462	2.36	ACE,ADAMTS9,AFDN,AHNAK2,AKAP13,ANKRD20A4P (includes others),ANKS1A,AR,ARID2,ATP10A,ATP7A,ATR,BRCA2,CAMKK2,CC2D2A,CD34,CDK6,CEP162,CEP290,CHURC1-FNTB,CPEB4,CX3CL1,DCC,DDIT4L,DENND4C,DMXL2,DNAJC16,DOCK6,DOCK8,DYNC2H1,EOGT,FAT4,FLNB,FLT1,GIGYF2,GNA14,GOLGA8K (includes others),GPER1,HDAC6,HERC2,HLA-C,HLA-DPB1,HMGCS1,IL6,IQSEC1,ITPR3,JAK1,KCNJ12,KDM3B,KDR,KIT,KLF11,KMT2A,KMT2C,KRT7,LRCH2,MACF1,MAML3,M…	103
Cancer,Gastrointestinal Disease,Hepatic System Disease,Organismal Injury and Abnormalities	Bile duct cancer	6.84E-10	9.16494	1.05069e-09	8.97852	2.36	ABCA6,ABI1,ACE,ACVR2A,ADAMTS9,AFDN,AHNAK2,ANKRD36,ANKS1A,ANO6,ARID2,ARID4A,ATP7A,ATR,BRCA2,C2orf81,CAMKK2,CC2D2A,CD34,CDC14A,CDK6,CEP290,CHD4,CHN1,CSDE1,CUL9,CX3CL1,CYP1A1,DENND4C,DMXL2,DOCK6,DOCK8,DROSHA,DTX4,DYNC2H1,EBF1,ELK4,ETV1,FAT4,FLT1,GEN1,GIGYF2,GPER1,HDAC6,HERC2,HES4,HIP1,HLA-C,HLA-DPB1,HMCN1,HMGCS1,IL6,ITPR3,JAK1,KCNJ12,KDM3B,KDR,KIAA1549L,KIF13B,KIF20B,KIT,KLF11,KLHL3,KMT2A,KMT2C,KRT7…	125
Cancer,Gastrointestinal Disease,Hepatic System Disease,Organismal Injury and Abnormalities	Bile duct carcinoma	7.95E-10	9.09963	1.21005e-09	8.9172	2.36	ABCA6,ABI1,ACE,ACVR2A,ADAMTS9,AFDN,AHNAK2,ANKRD36,ANKS1A,ANO6,ARID2,ARID4A,ATP7A,ATR,BRCA2,C2orf81,CAMKK2,CC2D2A,CD34,CDC14A,CDK6,CEP290,CHD4,CHN1,CSDE1,CUL9,CX3CL1,DENND4C,DMXL2,DOCK6,DOCK8,DROSHA,DTX4,DYNC2H1,EBF1,ELK4,ETV1,FAT4,FLT1,GEN1,GIGYF2,GPER1,HDAC6,HERC2,HES4,HIP1,HLA-C,HLA-DPB1,HMCN1,HMGCS1,IL6,ITPR3,JAK1,KCNJ12,KDM3B,KDR,KIAA1549L,KIF13B,KIF20B,KIT,KLF11,KLHL3,KMT2A,KMT2C,KRT7,LRCH2,…	124
Cellular Development,Cellular Growth and Proliferation	Proliferation of prostate cancer cell lines	6.98E-09	8.15614	9.19631e-09	8.03639	2.352	ACACA,ACKR3,AR,ARRB1,BCOR,BIRC6,BMX,CAMKK2,CD74,CDK6,CLU,DAB2,DACH1,EHMT2,ELK4,EP300,EPAS1,ETS1,ETV1,EZH2,FLI1,FOXO1,FST,HGF,IGF2R,IGFBP5,IL24,IL6,IQGAP2,ITGA6,ITGB4,JMJD1C,KCTD12,KDM3B,KLHL3,LAMB2,LCP1,LEF1,MED12,MTOR,NCOA3,NOTCH1,NRIP1,PBX1,PHTF2,PLXNB1,PPARG,PRKAR2B,PRKDC,PTPN11,RBM33,RRP9,SATB1,SHC1,SLC12A5,SORT1,STING1,STS,TRIM39,UBE3A,UNC5C,USP22,VAV3,ZNF507	64
Tissue Morphology	Quantity of progenitor cells	5.88E-15	14.2306	1.34554e-14	13.8711	2.344	ADAR,AFF1,AHR,AKAP13,ALDH2,APAF1,APP,AR,ARID4A,BCL2L11,BMAL1,BRCA2,CBL,CCR7,CD34,CDK6,CHD7,CIB1,CLEC11A,DAXX,EBF1,EFNB2,ELK4,EP300,EPAS1,EPHA4,EPS15,ETS1,EZH2,FLI1,FOXO1,FST,GATA2,GATAD2B,GLCCI1,IL6,IL7,INPP5D,ITGA1,ITGA2B,ITPKB,ITPR3,JAK1,JAM3,JARID2,KDR,KIT,KLF13,KMT2A,KMT2E,LAMA4,LAMC1,LAT,MAML1,MARCHF8,MCF2L,MECOM,MGAT5B,MTOR,NBEAL2,NFATC1,NOTCH1,NR2C2,PBX1,PIK3CG,PLCG1,PLXND1,PPARG,PRKCH,PRK…	86
Cancer,Hematological Disease,Immunological Disease,Organismal Injury and Abnormalities	Lymphoma	5.30E-34	33.2757	2.03065e-33	32.6924	2.343	AASS,ABCC1,ABCG2,ACE,ADAMTS9,ADAR,ADGRA2,ADGRF5,ADORA3,ADRA1D,AFAP1L1,AHNAK2,AHR,ALDH2,AMIGO3,AMOT,ANKRD20A4P (includes others),ANKRD24,ANKRD36,APBA1,APCDD1,APP,ARFGEF3,ARHGEF28,ARID2,ASAP2,ATF7,ATP10A,ATP13A3,ATP7A,AXIN2,BACE2,BAZ2B,BCL2L11,BCL9,BCOR,BIRC6,BRCA2,BRME1,CALCRL,CAMKK2,CAVIN2,CC2D2A,CCL5,CCR7,CD34,CD74,CDK6,CDON,CELF2,CEP120,CHD4,CHD6,CLEC16A,CLU,CNOT3,CORO2B,CPNE3,CRACD,CRYBG1,CSDE…	319
Organismal Injury and Abnormalities	Hypertrophy	6.07E-10	9.21681	9.38176e-10	9.02772	2.337	ACE,ADK,ADORA3,ADRA1D,ADRA2A,AHR,APAF1,APP,AR,BMPR2,BMX,CAST,CDK7,CIB1,CMKLR1,CNOT3,DPP4,EP300,EPAS1,FLNB,FLT1,FOXM1,FOXO1,FST,GPER1,GUCY1A1,HDAC9,HEY2,HGF,HSPG2,IER3,IGF2R,IGFBP5,IL6,IL7,IRAG1,JARID2,JPH2,KCNQ1,LAMA4,MAP2K6,MBNL1,MBNL2,MLIP,MTOR,NF1,NFATC1,NOTCH1,NPR1,NR3C2,PBX1,PBX2,PDE9A,PHC1,PIGO,PIK3CG,PLCB1,PLD1,PPARG,PRKAA2,PTPN11,RAB11FIP3,RCAN2,RGS5,ROCK2,RPS6KA2,RPTOR,RRAD,SHC1,SMAD1,SM…	80
Cancer,Organismal Injury and Abnormalities	Neoplasia of tumor cell lines	1.97E-09	8.70553	2.8264e-09	8.54877	2.312	ABI1,ABR,ADAMTS9,ADGRF5,AFAP1L1,AMOT,APP,ARFGEF2,ARID2,ARRDC3,ASAP1,ASL,ATP7A,AXIN2,BCL9,BMX,CAVIN2,CCN3,CNOT6L,COL9A3,CRIP1,DACH1,DGKA,DPP4,DROSHA,E2F8,EFNB2,EPAS1,ETS1,EXOC6B,FAM120B,FBXL7,FNBP1L,FOXD1,FOXM1,FOXP1,GSE1,HGF,IL6,ITGA1,ITGA2,ITGA6,ITGB4,ITGBL1,KCNN3,KMT2A,KRT7,LEF1,LIFR,LTBP1,MAGI1,MECOM,MRTFB,MTCL1,MTHFD2,MYEOV,NBEAL2,NCOA3,NEDD4L,NEDD9,NEK10,NEURL1B,NFIB,NIPBL,NOTCH1,NRSN2,NUAK1…	111
Cell Death and Survival,Organismal Injury and Abnormalities	Apoptosis of blood cells	4.31E-08	7.36552	5.16168e-08	7.28721	2.302	ADAR,ADORA3,AHR,APP,ARRB1,ATF7,BCL2L11,BIRC6,CAST,CCL5,CCR7,CDK6,CUL9,CX3CL1,DOCK8,DRAM2,EP300,EPAS1,EPHA4,ETS1,EZH2,FCMR,FLI1,FOXP1,IER3,IFIH1,IL6,IL7,INPP5D,IRAK3,ITPR3,KIFAP3,KLF13,MAP2K6,MCF2L,MECOM,MERTK,MT2A,MTOR,NF1,NFATC1,NOTCH1,PARP14,PELI2,PIK3CG,PLCG1,PPARG,PRKCQ,PRKDC,RCAN2,REL,RPTOR,SATB1,SFN,SHC1,SLC39A10,SMAD4,SPHK1,ST6GAL1,STAT1,STING1,TNFRSF11A,TNFSF4,TSC1,TSC22D3,UBD,VAV3,VIP,WW…	70
Cellular Development,Cellular Growth and Proliferation,Hematological System Development and Function,Hematopoiesis,Lymphoid Tissue Structure and Development,Tissue Development	Differentiation of phagocytes	1.46E-08	7.83565	1.84111e-08	7.73492	2.282	AHR,ANKRD24,APP,BCOR,CCL23,CD74,CDK6,CLEC11A,CSF2RB,CYSLTR1,EBF1,EIF6,ERN1,FLRT2,FOXO1,FOXP1,GAB2,GATA2,GMPR2,HGF,HLA-DRB1,IL6,IL7,INPP5D,KDR,KIT,KLF12,KMT2A,KMT2E,LEF1,LIFR,MTOR,NFATC1,NOTCH1,OSTM1,PFKFB3,PPARG,PRDM1,PTPN11,REL,RPTOR,SH2B3,SHC1,ST8SIA1,STAT1,TGFBR2,TLR1,TLR6,TNFSF9,UBD,VPS13A	51
Organismal Injury and Abnormalities	Soft tissue lesion	6.93E-104	103.159	1.05e-102	101.979	2.268	AASS,ABCA3,ABCA6,ABCB7,ABCC1,ABCG2,ABR,ACBD5,ACE,ACKR3,ACVR2A,ADAMTS10,ADAMTS9,ADAR,ADARB1,ADCK1,ADCY9,ADGRA2,ADGRF5,ADRA1D,ADRA2A,ADSS1,AFAP1L1,AFDN,AFF1,AGTPBP1,AHCTF1,AHNAK2,AHR,AKAP13,AKAP9,AKR1E2,ALDH2,AMIGO3,AMOT,ANKHD1-EIF4EBP3,ANKRD20A4P (includes others),ANKRD23,ANKRD24,ANKRD28,ANKRD33,ANKRD36,ANKRD65,ANKS1A,ANO6,APAF1,APBA1,APCDD1,APOLD1,APP,AR,ARFGEF1,ARFGEF2,ARFGEF3,ARHGAP19,ARHGAP27,…	978
Carbohydrate Metabolism	Quantity of carbohydrate	3.55E-08	7.44977	4.27711e-08	7.36885	2.263	ABCC1,ABCG2,ACACA,ACVR2A,ADORA3,ADRA2A,APAF1,APP,AR,ATP7B,BMAL1,CAMKK2,CCDC80,CDS2,CFB,CLCN3,CLU,CNOT3,DYSF,EP300,EZH2,FMO5,FOXO1,FOXO6,FOXP1,GHR,GNMT,GPER1,HAPLN1,HGF,HTR1B,IGFBP5,IL6,INPP5D,ITPR3,ITPRID2,LIFR,LPIN1,LPL,LYST,MBOAT7,MGAT4A,MGAT5B,MT2A,MTHFD2,MTOR,MYO1C,NCOA3,NR2C2,NRIP1,NUAK1,OSTM1,PBX1,PFKFB3,PIK3C2A,PIK3CG,PIK3R2,PLD1,PLPP3,PPARG,PPP1R3B,PRKAA2,PRKN,PTP4A3,PTPN11,RGL1,RNF213,RO…	85
Embryonic Development,Nervous System Development and Function,Organismal Development	Development of central nervous system	1.41E-11	10.8508	2.54513e-11	10.5943	2.255	AASS,ABR,ADGRA2,AFDN,AGTPBP1,APAF1,APP,ATAT1,ATP7A,AXIN2,B3GNT5,BRCA2,BTBD3,CC2D2A,CD93,CDK5RAP2,CDK6,CDON,CELF1,CEP120,CEP290,CHD7,CIT,CNTNAP1,CX3CL1,DMXL2,DYNC2H1,EPHA4,EZH2,FAT4,FILIP1,FOXD1,FOXJ3,FOXO1,FRS2,GATAD2B,GMPPA,HERC1,HEY2,HGF,HSPG2,IFT172,IL6,IRX5,ITGA6,JARID2,KDM2B,LAMB2,LAMC1,LAMC3,LEF1,LHX6,MBOAT7,MECOM,MED12,MERTK,MGAT5B,MIOS,MRTFB,MTOR,NAV2,NCSTN,NF1,NFIA,NFIB,NIPBL,NOTCH1,NR2C…	106
Cell Death and Survival,Hematological System Development and Function,Organismal Injury and Abnormalities	Cell viability of lymphocytes	6.66E-10	9.17653	1.02619e-09	8.98877	2.247	ARRB1,BCL2L11,CBL,CD74,CHD4,CLEC11A,CLOCK,CLU,DOCK8,EBF1,FCMR,FOXP1,HGF,IL6,IL7,INPP5D,ITPKB,ITPR3,KIT,LAT,LEF1,MCF2L,MTOR,NOTCH1,PARP14,PIK3CG,PLXNB1,PRDM1,PRKCQ,REL,RPTOR,SMAD4,STAT1,TNFSF9,TSC1,TSC22D3,VIP	37
Lipid Metabolism,Molecular Transport,Small Molecule Biochemistry	Concentration of lipid	5.10E-08	7.29243	6.04982e-08	7.21826	2.247	ABCG2,ACACA,ACE,ADGRF5,ADORA3,ADRA2A,AHR,AKAP9,ALDH2,APAF1,APOD,APP,AR,ARRB1,ATP10A,ATP1A1,ATP7B,B3GNT5,BMAL1,CBL,CCDC80,CDS2,CFB,CHRNA7,CLDN7,CLEC11A,CLOCK,CLU,CNOT3,CX3CL1,CYP1A1,CYSLTR1,DPP4,DYSF,EDNRB,EFNB2,EP300,EPAS1,EPM2A,EZH2,FLI1,FMO5,FOXO1,FYCO1,GHR,GPER1,GRAMD1C,HERC1,HGF,IL6,INPP5D,ITGA1,ITPRID2,JAK1,JARID2,KDM3B,KIF13B,KMT2C,LIMA1,LPIN1,LPL,LSR,LYST,MBOAT7,MERTK,MGAT4A,MTOR,MYO1C,MYO…	124
Cancer,Organismal Injury and Abnormalities	Sarcoma	5.03E-14	13.2984	1.08639e-13	12.964	2.236	ADRA1D,AFAP1L1,AFF1,AHCTF1,AHNAK2,AKAP13,AR,ARFGEF3,ARID2,ARID4A,ATP2B4,ATR,AXIN2,BCOR,BRCA2,C22orf46P,CBL,CC2D2A,CCDC150,CD34,CDK6,CDK7,CHD4,CHM,CSF2RB,CSMD2,CUL9,DACH1,DAXX,DCC,DCLRE1A,DOCK6,DOP1B,EHMT2,EIF4G3,EPM2A,EPS15,ETV1,EZH2,FILIP1,FLI1,FLT1,FOXM1,FOXO1,GABRP,GPER1,GPRIN3,GSE1,HDAC6,HECW2,HERC1,HGF,HMGCS1,HRCT1,HSPG2,HTR1B,IGF2R,IGFBP5,IL6,INPP5D,IRAG1,IRF6,ITPR3,JPH2,KATNAL2,KDM3B,KDR,K…	159
Cancer,Organismal Injury and Abnormalities	Abdominal adenocarcinoma	2.23E-135	134.652	1.115e-132	131.953	2.224	AASS,ABCA3,ABCA6,ABCB7,ABCC1,ABCG2,ABI1,ABR,ACBD4,ACBD5,ACE,ACER2,ACKR3,ACVR2A,ADAMTS10,ADAMTS9,ADAR,ADARB1,ADCK1,ADCY9,ADGRA2,ADGRF5,ADK,ADORA3,ADRA1D,ADRA2A,ADSS1,AFAP1L1,AFDN,AFF1,AGTPBP1,AHCTF1,AHCYL2,AHNAK2,AHR,AKAP13,AKAP9,ALDH2,AMIGO3,AMOT,ANKHD1-EIF4EBP3,ANKRD20A4P (includes others),ANKRD23,ANKRD24,ANKRD28,ANKRD36,ANKRD65,ANKS1A,ANO6,APAF1,APBA1,APCDD1,APOD,APOLD1,APP,AR,ARFGEF1,ARFGEF2,A…	1126
Cancer,Organismal Injury and Abnormalities,Reproductive System Disease	Hyperplasia of genital organ	1.38E-08	7.86012	1.75349e-08	7.7561	2.219	ADAMTS10,ADRA1D,AHNAK2,AR,ARID2,ATG2A,BAZ2A,BIRC6,BRCA2,CAND2,CCDC180,CHD6,CRAMP1,DCAF11,DOCK8,ETV1,EZH2,FANCM,FMNL2,FOXM1,FST,GABRP,HEY2,ITGAX,JAK1,KIT,KMT2A,LAMA4,LENG9,LRRC8C,MARF1,MAST4,MYO6,NAV2,NFATC1,NR3C2,OPRL1,PCDHGA11,PCDHGB1,PCDHGB6,PCDHGB7,PDE11A,PIK3R2,PPFIA3,PRKACB,PTPN21,RAB11FIP3,RFX7,RIPK4,RXRB,SHANK3,SKIC2,SNRNP200,SPTBN1,TSC22D3,VPS33A,WFS1,ZBTB16,ZNF135,ZNF419,ZSWIM8	61
Cell-To-Cell Signaling and Interaction	Binding of tumor cell lines	3.06E-08	7.51428	3.72263e-08	7.42915	2.207	AFDN,APP,AR,ARFGEF1,ASAP1,CALCRL,CBL,CCN3,CD177,CX3CL1,DAB2,DOCK8,DPP4,DYSF,ETS1,FOXM1,FOXO1,FOXP1,GALNT6,HGF,IL6,INHBB,ITGA2,ITGA6,ITGAX,ITGB4,JAM3,LAT,LEF1,LPL,MAGI1,MECOM,MON2,MTOR,MYO6,NID1,NOTCH1,NPFFR2,PHLDA1,PLCG1,PLD1,POMC,PPARG,PREX1,PTP4A3,PTPN11,PTPRM,ROCK2,SCIN,SDC2,SH2B3,SHC1,SMAD4,ST6GAL1,STAT1,TFF3,TJP1,TNC,TNFSF9,UTRN,VCAN,VIM,WWTR1,ZBTB16	64
Organismal Injury and Abnormalities,Reproductive System Disease	Disorder of pregnancy	2.34E-10	9.63078	3.76812e-10	9.42388	2.205	ABI1,ABR,ADGRF5,ADK,ADORA3,ADRA1D,ADRA2A,AKAP13,AMOT,ARHGAP28,ATP1A1,ATP6V1A,AXIN2,BACE2,BCAS3,BIRC6,CALCRL,CBLN1,CCDC80,CCR7,CEP20,CHM,CMKLR1,COQ10A,CSDE1,CTDSPL,CX3CL1,DCHS1,DENND11,DOCK6,DYSF,E2F8,EPB41L4A,ERN1,FANCB,FLI1,FLRT2,FLT1,FOXP1,FST,FZD4,GABRP,GALNT18,GBP4,GUCY1A1,HDAC9,HGF,HMGCS1,HSPA1A,IER3,IGF2R,IGFBP5,IL6,INTS3,ITGAX,ITPKB,JARID2,KALRN,KCNIP1,KCNQ1,KDR,KIAA0040,KIT,KMT2C,KSR2,LAM…	142
Cancer,Hematological Disease,Immunological Disease,Organismal Injury and Abnormalities	B-cell lymphoma	9.71E-25	24.0128	3.13226e-24	23.5041	2.195	AASS,ABCC1,ABCG2,ACE,ADGRF5,ADORA3,AHNAK2,AHR,AMIGO3,AMOT,ANKRD24,ANKRD36,APBA1,APCDD1,APP,ARFGEF3,ARHGEF28,ASAP2,ATP10A,ATP13A3,ATP7A,BACE2,BAZ2B,BCL2L11,BCOR,BIRC6,BRCA2,BRME1,CALCRL,CAMKK2,CC2D2A,CCL5,CCR7,CD34,CD74,CDK6,CDON,CELF2,CHD4,CHD6,CLEC16A,CNOT3,CORO2B,CRACD,CSDE1,CSF2RB,CSMD2,CUL9,DCC,DCHS1,DGKA,DNMBP,DOP1B,DSTYK,DYSF,E2F8,EBF1,EHMT2,EP300,ETS1,ETV1,EZH2,FAM13C,FANCB,FAT4,FBXO25,FIP…	233
Cancer,Organismal Injury and Abnormalities	Adenocarcinoma	7.94E-129	128.1	1.32333e-126	125.878	2.193	AASS,ABCA3,ABCA6,ABCB7,ABCC1,ABCG2,ABI1,ABR,ACBD4,ACBD5,ACE,ACER2,ACKR3,ACVR2A,ADAMTS10,ADAMTS9,ADAR,ADARB1,ADCK1,ADCY9,ADGRA2,ADGRF5,ADK,ADORA3,ADRA1D,ADRA2A,ADSS1,AFAP1L1,AFDN,AFF1,AGTPBP1,AHCTF1,AHCYL2,AHNAK2,AHR,AKAP13,AKAP9,ALDH2,AMIGO3,AMOT,ANKHD1-EIF4EBP3,ANKRD20A4P (includes others),ANKRD23,ANKRD24,ANKRD28,ANKRD36,ANKRD65,ANKS1A,ANO6,APAF1,APBA1,APCDD1,APOD,APOLD1,APP,AR,ARFGEF1,ARFGEF2,A…	1136
Neurological Disease,Organismal Injury and Abnormalities	Neurogenic lesion	2.62E-104	103.582	4.4e-103	102.357	2.188	AASS,ABCA3,ABCA6,ABCB7,ABCC1,ABCG2,ABR,ACBD5,ACE,ACKR3,ACVR2A,ADAMTS10,ADAMTS9,ADAR,ADARB1,ADCK1,ADCY9,ADGRA2,ADGRF5,ADRA1D,ADRA2A,ADSS1,AFAP1L1,AFDN,AFF1,AGTPBP1,AHCTF1,AHNAK2,AHR,AKAP13,AKAP9,AKR1E2,ALDH2,AMIGO3,AMOT,ANKHD1-EIF4EBP3,ANKRD20A4P (includes others),ANKRD23,ANKRD24,ANKRD28,ANKRD36,ANKRD65,ANKS1A,ANO6,APAF1,APBA1,APCDD1,APOLD1,APP,AR,ARFGEF1,ARFGEF2,ARFGEF3,ARHGAP27,ARHGAP28,ARHGEF28…	901
Cardiovascular Disease,Organismal Injury and Abnormalities	Congestive heart failure	3.96E-07	6.4023	4.13361e-07	6.38367	2.176	ACE,ADRA1D,ADRA2A,AR,ATP1A1,DPP4,GUCY1A1,HEY2,IGF2R,IL6,KCNJ12,KCNJ5,MAP3K1,NPR1,NPR3,NR3C2,PDE11A,PDE4C,PDE7B,PDE9A,PPARG,SBF2,SCNN1B,SCNN1G,SLC12A5,STAB2	26
Cancer,Organismal Injury and Abnormalities	Malignant neoplasm of retroperitoneum	1.20E-54	53.9208	6.45161e-54	53.1903	2.167	ABCA3,ABCG2,ABR,ACKR3,ACVR2A,ADAMTS10,ADAR,ADARB1,ADGRF5,ADORA3,ADRA2A,ADSS1,AFDN,AFF1,AHCTF1,AHNAK2,AHR,AKAP13,AKAP9,ALDH2,AMOT,ANKHD1-EIF4EBP3,ANKRD24,ANKRD36,APAF1,APOD,APP,AR,ARFGEF2,ARFGEF3,ARHGEF12,ARHGEF6,ARID2,ARSL,ASAP1,ATF7,ATG2A,ATP10A,ATP11A,ATP13A3,ATP2B4,ATP7A,ATP7B,ATR,AXIN2,BACE2,BAZ2A,BAZ2B,BCL2L11,BCL9,BCOR,BFAR,BIRC6,BMAL1,BMPR2,BOC,BRCA2,BRME1,C22orf46P,C2CD2,C2orf81,C8orf82,C…	525
Lymphoid Tissue Structure and Development,Tissue Morphology	Quantity of lymphoid tissue	1.60E-10	9.79588	2.64026e-10	9.57835	2.166	ACKR3,ADAR,AFF1,AHR,AKAP13,B3GNT5,BCL2L11,BMAL1,CBL,CCR7,CD34,CD74,CDK6,CHD7,DOCK8,EFNB2,ELK4,EP300,EPHA4,EPS15,ETS1,EZH2,FCMR,FLI1,FOXO1,GATA2,GLCCI1,IFIH1,IL6,IL7,INPP5D,ITPKB,JAK1,KIT,KLF13,KMT2E,LAT,MAML1,MARCHF8,MCF2L,MTOR,NEDD9,NFATC1,NOTCH1,PIK3CG,PLXND1,PRDM1,PRKCH,PRKCQ,PRKDC,PTPRCAP,REL,RINL,RPTOR,SATB1,SFN,ST6GAL1,STAT1,TGFBR3,TNFRSF11A,TP53BP1,TSC1,VAV3	63
Organismal Injury and Abnormalities	Benign lesion	3.55E-29	28.4498	1.21575e-28	27.9152	2.163	ABCG2,ACKR3,ACVR2A,ADARB1,ADRA1D,AFDN,AFF1,AHNAK2,AHR,ALDH2,APOD,APOLD1,APP,AR,ARFGEF1,ARFGEF2,ARID4A,ARSL,ATG2A,ATP1A1,ATR,AXIN2,BACE2,BCL9,BCOR,BDH1,BMAL2,BMPR2,BOC,BRCA2,C2CD2,CALCRL,CAVIN2,CBL,CCDC80,CD109,CD177,CD34,CELF2,CEP290,CFB,CHD6,CIT,CLEC16A,CLOCK,CLU,COL7A1,CRIM1,CRIP1,CRLF1,CSF2RB,CSGALNACT1,CSMD2,CX3CL1,DAB2,DACH1,DAXX,DCC,DCLRE1A,DDX39B,DGKA,DLGAP4,DROSHA,EDNRB,EP300,EPAS1,EPHA4,…	258
Cell-To-Cell Signaling and Interaction	Activation of cells	4.00E-14	13.3979	8.77193e-14	13.0569	2.159	ACE,ACKR3,ADGRF5,ADK,ADRA2A,AHR,ANO6,APP,ATP1A1,ATR,BCL2L11,CAST,CBL,CCL23,CCL5,CCN3,CCR7,CD74,CD93,CHRNA7,CLEC11A,CLU,CORO2B,CSF2RB,CX3CL1,CYSLTR1,DACH1,DGKA,DOCK8,DPP4,DYSF,EBF1,EDNRB,EFNB2,ERN1,ETS1,FAM76B,FBXO38,FOXD1,FOXO1,FOXP1,GATA2,GHR,GPER1,HBP1,HDAC6,HDAC9,HGF,HLA-C,HLA-DPB1,HLA-DRB1,HPS1,HSPA1A,HSPG2,IER3,IFIH1,IGF2R,IL18R1,IL24,IL6,IL7,INPP5D,IQGAP1,IRAK3,IRF6,ITGA1,ITGA2B,ITGA8,ITGAX…	153
Cardiovascular Disease,Neurological Disease,Organismal Injury and Abnormalities,Skeletal and Muscular Disorders	Cardiomyopathy	3.00E-16	15.5229	7.33496e-16	15.1346	2.158	ABCC1,ABI1,ACE,ACKR3,ADAR,ADORA3,ADRA1D,ADRA2A,AHR,AKAP13,AKAP9,ALDH2,APAF1,APOD,APOLD1,APP,AR,ARRB1,ATAT1,ATE1,ATF7,ATP11A,ATP1A1,BCAS3,BCL2L11,BMPR2,BMX,BORCS7-ASMT,BRCA2,BRME1,CALCRL,CAND2,CAST,CBL,CCL5,CCN3,CCR7,CD109,CD74,CDK6,CDS2,CELF1,CEP192,CHD4,CHD7,CLU,CNIH3,CPEB4,CRAMP1,CX3CL1,DAXX,DCHS1,DPP4,DYSF,EP300,ETFDH,ETS1,FAM120B,FILIP1,FLT1,FOXM1,FOXO1,FOXO6,FOXP1,FRRS1,FRS2,GABRP,GALNT18,GI…	203
Hematological System Development and Function,Hematopoiesis,Tissue Morphology	Quantity of hematopoietic progenitor cells	1.25E-12	11.9031	2.40848e-12	11.6183	2.155	ADAR,AFF1,AHR,AKAP13,ALDH2,ARID4A,BCL2L11,BMAL1,BRCA2,CBL,CCR7,CD34,CDK6,CHD7,CIB1,CLEC11A,DAXX,EBF1,EFNB2,ELK4,EP300,EPAS1,EPHA4,EPS15,ETS1,EZH2,FLI1,FOXO1,GATA2,GLCCI1,IL6,IL7,INPP5D,ITGA2B,ITPKB,ITPR3,JAK1,JAM3,JARID2,KDR,KIT,KLF13,KMT2A,KMT2E,LAMA4,LAT,MAML1,MARCHF8,MCF2L,MECOM,MGAT5B,MTOR,NBEAL2,NFATC1,NOTCH1,NR2C2,PBX1,PIK3CG,PLCG1,PLXND1,PRKCH,PRKCQ,PRKDC,PTPN11,RASSF2,REL,RPTOR,SATB1,SH2B…	78
Embryonic Development,Organ Development,Organismal Development,Tissue Development	Development of sensory organ	1.27E-07	6.8962	1.43018e-07	6.84461	2.155	ABR,ADCK1,AGTPBP1,APP,ARID2,BCL2L11,BCL9,BMPR2,CECR2,CHD7,COL7A1,DCHS1,EBF1,EPHA4,FOXD1,FRS2,FYCO1,FZD4,GATA2,HDAC6,HEY2,HGF,HIF3A,HPS3,HPS5,HSPG2,IL6,INHBB,IRX5,ITGA6,ITGA8,JAM3,KCNQ1,KDR,LAMB2,LEF1,MAP3K1,MED12,MRTFB,MYO6,NCAM2,NF1,NIPBL,NOTCH1,PBX1,PDE6B,PHC1,PIK3R2,PSMB8,PTPN11,PXDN,RXRB,SEMA6A,SETD2,SHANK3,SHROOM2,SHROOM4,SP1,SPEN,SPTBN1,TBC1D32,TFAP2A,TNFRSF12A,TSHZ1	64
Cardiovascular Disease,Organismal Injury and Abnormalities	Occlusion of blood vessel	5.84E-19	18.2336	1.61773e-18	17.7911	2.138	ABCC1,ACE,ACER2,ADGRF5,ADK,AHR,AKAP13,ALDH2,ANKS1A,APP,AR,ARHGEF12,ARID4A,ASAP2,BCAS3,BLOC1S5-TXNDC5,BMAL1,BORCS7-ASMT,C1QL3,CAMKK2,CAPS2,CARF,CCL5,CCN3,CD109,CD93,CFB,CLOCK,CLU,CX3CL1,DENND5A,DMXL2,DOCK6,DOCK8,DPP4,DSTYK,EDNRB,ENTREP1,ERN1,ETV1,F8,FLI1,FLT1,FOLH1,FOXO1,GHR,GIGYF2,GUCY1A1,GUSBP1,HDAC9,HGF,HIPK3,HIVEP1,HRCT1,HSPG2,IFIH1,IGF2R,IL6,INPP5D,IQGAP2,ITGA1,ITGA2B,ITGAX,ITPR3,JAK1,JCAD,JM…	167
Dermatological Diseases and Conditions,Organismal Injury and Abnormalities	Loss of hair	5.52E-09	8.25806	7.36983e-09	8.13254	2.138	ADAMTS10,ADGRA2,ADRA1D,AHR,APCDD1,AR,B3GNT5,CD74,CDON,CFB,CIB1,CLEC16A,CLIC2,CLOCK,CMKLR1,CRLF1,CSGALNACT1,DCHS1,DOCK8,EBF1,EDA,EML6,FGF11,FST,GALNT15,GATA2,GATAD2B,GSE1,GTF2H4,GTF3C1,HDAC9,HEPH,HES4,HEY2,HGF,HIF3A,HLA-DPB1,HLA-DRB1,HLA-F,HSPG2,IL18R1,IL7,IQGAP1,IRAK3,ITGAX,JAK1,JMY,KALRN,KAT2B,KCNJ5,KDR,KIT,KLF8,KSR2,LAMA4,LAMB2,LAMC1,LAMC3,LCP1,LEF1,LIFR,LYPD5,MAGI1,MAML3,MBNL1,MCC,MICB,MPDZ,MT…	126
Lymphoid Tissue Structure and Development,Organ Morphology,Tissue Morphology	Quantity of lymphoid organ	1.11E-10	9.95468	1.86869e-10	9.72846	2.136	ADAR,AFF1,AHR,AKAP13,B3GNT5,BCL2L11,CBL,CCR7,CD34,CDK6,CHD7,DOCK8,EFNB2,ELK4,EP300,EPHA4,ETS1,EZH2,FLI1,FOXO1,GATA2,GLCCI1,IL6,IL7,INPP5D,ITPKB,JAK1,KIT,KLF13,KMT2E,LAT,MAML1,MARCHF8,MCF2L,NFATC1,NOTCH1,PIK3CG,PLXND1,PRKCH,PRKCQ,PRKDC,PTPRCAP,RINL,RPTOR,SATB1,STAT1,TGFBR3,TNFRSF11A,TP53BP1,TSC1,VAV3	51
Cell Death and Survival,Hematological System Development and Function,Organismal Injury and Abnormalities	Cell viability of B lymphocytes	3.75E-09	8.42597	5.14403e-09	8.2887	2.13	BCL2L11,CBL,CD74,CHD4,CLOCK,CLU,EBF1,FCMR,FOXP1,HGF,IL6,IL7,INPP5D,ITPKB,ITPR3,LEF1,MTOR,PARP14,PIK3CG,PLXNB1,PRDM1,REL,RPTOR,TNFSF9,TSC22D3	25
Organismal Survival	Survival of organism	3.20E-11	10.4949	5.6239e-11	10.25	2.126	ABCA3,ABCC1,ABCG2,ADRA2A,AFDN,AHR,AKAP13,ALDH2,APOD,APP,AR,ARHGEF6,ARRB1,ATP7B,ATR,B3GNT5,BCL2L11,BCOR,BMPR2,BRCA2,CAMKK2,CAST,CBL,CCN3,CD74,CDK6,CEACAM21,CFB,CHD4,CLEC11A,CSF2RB,CX3CL1,DCLRE1A,EFNB2,EPAS1,ETS1,EZH2,FCHSD2,FCMR,FLI1,FLT1,FOXM1,FOXO1,FOXP1,FST,GATA2,GGNBP2,GPER1,GRAMD1A,GRAMD1C,HAPLN1,HEATR5B,HECW2,HGF,HLA-DRB1,HNRNPH1,HSPA1A,IDE,IFIH1,IGF2R,IGFBP5,IL18R1,IL24,IL6,IL7,INHBB,INPP5D…	136
Cancer,Organismal Injury and Abnormalities	Breast or ovarian neoplasm	5.06E-55	54.2958	2.73514e-54	53.563	2.124	AASS,ABCA3,ABCA6,ABCB7,ABCC1,ABCG2,ABR,ACACA,ACBD5,ACE,ACVR2A,ADAMTS10,ADAMTS9,ADCK1,ADCY9,ADGRA2,ADGRF5,ADK,ADORA3,ADRA1D,ADRA2A,ADSS1,AFDN,AGTPBP1,AHCTF1,AHNAK2,AKAP13,AKAP9,ALDH2,AMOT,ANKRD24,ANKRD36,ANO6,APAF1,APBA1,APCDD1,APOD,APP,AR,ARFGEF1,ARHGAP19,ARHGAP27,ARHGEF12,ARHGEF28,ARID2,ARRB1,ARRDC3,ASAP1,ASL,ATAD2B,ATE1,ATF6B,ATG2A,ATP10A,ATP1A1,ATP2B4,ATP7A,ATP7B,ATR,AXIN2,B3GNT5,BCAS3,BCL2L11…	638
Tissue Development	Growth of epithelial tissue	9.70E-13	12.0132	1.87621e-12	11.7267	2.109	ACVR2A,AHR,AMOT,APP,AR,ATP7A,BMPR2,BMX,CALCRL,CASK,CAVIN2,CBL,CCL5,CCR7,CD109,CD34,CDK6,CELF1,CLU,DAB2,DACH1,DCC,DGKA,DYSF,E2F8,EDA,EDNRB,EFNB2,EP300,EPAS1,ERN1,EZH2,FLI1,FLT1,FOXM1,FOXO1,FOXP1,FRS2,FST,GAB2,GATA2,HDAC6,HGF,HSPG2,IFT172,IL24,IL6,INHBB,IQGAP1,IRF6,IRX5,ITGA1,ITGA6,ITGB4,KDR,KIT,LAMC1,MAP2K6,MCC,MERTK,MKI67,MT2A,MTOR,MTSS1,MYOF,NCOA3,NCSTN,NF1,NFATC1,NFIB,NOTCH1,NRP2,PC,PFKFB3,PLCG…	114
Cellular Development,Cellular Growth and Proliferation,Hematological System Development and Function,Humoral Immune Response,Lymphoid Tissue Structure and Development	Proliferation of B lymphocytes	4.89E-07	6.31069	5.03605e-07	6.29791	2.102	AHR,ARHGEF6,B3GNT5,BCL2L11,CBL,CD74,CFB,CHD4,EBF1,EP300,ETS1,FLI1,FOXO1,FOXP1,IL24,IL6,IL7,INPP5D,ITPR3,LCP1,LEF1,LPIN1,MAP3K1,MERTK,MTOR,NFATC1,PARP14,PIK3CG,PPARG,PRDM1,PTPN11,PTPRCAP,REL,RPTOR,SFN,SH2B3,SLC39A10,ST6GAL1,STAT1,STIM1,TEC,TNFSF9,VAV3,ZBTB16	44
Cancer,Organismal Injury and Abnormalities	Advanced malignant solid tumor	2.22E-09	8.65365	3.14448e-09	8.50245	2.097	ACKR3,ADAR,ADGRA2,ADORA3,ADRA1D,AFAP1L1,AR,ARID2,ATP9A,ATR,AXIN2,BCL2L11,BCOR,BMPR2,BRCA2,CCL5,CCR7,CDK6,CLCN3,CLU,CRYBG1,CSF2RB,DAB2,DACH1,DAXX,DPP4,DROSHA,EDNRB,EFNB2,ELK4,EP300,EPAS1,EPB41L4B,ETS1,ETV1,EZH2,FBXL7,FLRT2,FLT1,FOLH1,FOXO1,FST,GABRP,GATA2,GEN1,GPER1,HGF,HPS3,HSPA1A,IGFBP5,IL24,IL6,ITPR3,JAK1,KAT2B,KCNN3,KDR,KIT,KLF8,KLHL3,KMT2C,LAMB2,MAGI1,MDC1,MECOM,MED12,MERTK,MGAT4A,MT-CO1,MT-C…	114
Embryonic Development,Nervous System Development and Function,Organ Development,Organismal Development,Tissue Development	Formation of brain	2.46E-11	10.6091	4.38503e-11	10.358	2.075	AASS,ABR,ADGRA2,AFDN,AGTPBP1,APAF1,APP,ATAT1,ATP7A,BRCA2,BTBD3,CC2D2A,CD93,CDK5RAP2,CDK6,CDON,CELF1,CEP120,CEP290,CHD7,CX3CL1,DMXL2,DYNC2H1,EPHA4,EZH2,FAT4,FILIP1,FOXD1,FRS2,GATAD2B,GMPPA,HERC1,HGF,HSPG2,IFT172,IL6,IRX5,ITGA6,KDM2B,LAMC1,LEF1,LHX6,MBOAT7,MECOM,MED12,MERTK,MRTFB,MTOR,NF1,NFIA,NFIB,NIPBL,NOTCH1,NR2C2,NRP2,PLCB1,PLCB4,PPARG,PRKDC,PTPN11,RBFOX2,RERE,REST,RORA,SELENOP,SETD2,SHANK3,SHR…	88
Cancer,Organismal Injury and Abnormalities	Cancer	1.34E-104	103.873	2.35088e-103	102.629	2.074	AASS,ABCA3,ABCA6,ABCB7,ABCC1,ABCG2,ABI1,ABR,ACACA,ACBD4,ACBD5,ACE,ACER2,ACKR3,ACVR2A,ADAMTS10,ADAMTS9,ADAR,ADARB1,ADCK1,ADCY9,ADGRA2,ADGRF5,ADK,ADORA3,ADRA1D,ADRA2A,ADSS1,AFAP1L1,AFDN,AFF1,AGTPBP1,AHCTF1,AHCYL2,AHNAK2,AHR,AKAP13,AKAP9,AKR1E2,ALDH2,AMIGO3,AMOT,ANKHD1-EIF4EBP3,ANKRD20A4P (includes others),ANKRD23,ANKRD24,ANKRD28,ANKRD33,ANKRD36,ANKRD65,ANKS1A,ANO6,APAF1,APBA1,APCDD1,APOD,APOLD1,APP…	1205
Cell Death and Survival,Organismal Injury and Abnormalities	Apoptosis of tumor cell lines	7.14E-14	13.1463	1.53219e-13	12.8147	2.071	ABCB7,ABCC1,ABCG2,ACACA,ACKR3,AHR,APAF1,APP,AR,ARHGEF6,ARID2,ATG2A,ATP1A1,ATR,AXIN2,BCL2L11,BCOR,BIRC6,BMPR2,BMX,BRCA2,CAMKK2,CAST,CCDC80,CD74,CDK6,CDON,CELF1,CELF2,CGNL1,CHD4,CIB1,CLIP3,CLU,CNOT3,CSF2RB,CUL9,DAB2,DAXX,DCC,DOCK8,DOCK9,DOP1B,DPP4,EBF1,EEF1B2,EHMT2,EP300,EPAS1,ERN1,ETS1,EXOC6B,EZH2,FBXO25,FCHSD2,FCMR,FIP1L1,FLNB,FLT1,FOXM1,FOXO1,FOXP1,FST,GATA2,GGNBP2,GLCCI1,GNL1,GPER1,GPR176,HDAC6…	218
Cell-To-Cell Signaling and Interaction	Interaction of tumor cell lines	2.15E-08	7.66756	2.65105e-08	7.57658	2.07	AFDN,APP,AR,ARFGEF1,ASAP1,ATE1,CALCRL,CBL,CCN3,CD177,CX3CL1,DAB2,DOCK8,DPP4,DYSF,ETS1,FOXM1,FOXO1,FOXP1,GALNT6,HGF,IL6,INHBB,ITGA2,ITGA6,ITGAX,ITGB4,JAM3,LAT,LEF1,LPL,MAGI1,MECOM,MON2,MTOR,MYO6,NID1,NOTCH1,NPFFR2,PHLDA1,PLCG1,PLD1,POMC,PPARG,PREX1,PTP4A3,PTPN11,PTPRM,ROCK2,RPTOR,SCIN,SDC2,SH2B3,SHC1,SMAD4,ST6GAL1,STAT1,TFF3,TJP1,TNC,TNFSF9,UTRN,VCAN,VIM,WWTR1,ZBTB16	66
Cardiovascular System Development and Function,Cellular Development,Cellular Function and Maintenance,Cellular Growth and Proliferation,Organismal Development,Tissue Development	Proliferation of endothelial cells	1.14E-07	6.9431	1.29841e-07	6.88659	2.07	APP,BMPR2,CALCRL,CAVIN2,CBL,CCR7,CD34,DAB2,DGKA,DYSF,EDNRB,ERN1,FLI1,FLT1,FOXM1,FOXO1,FRS2,HGF,HSPG2,IL24,IL6,IQGAP1,ITGA1,KDR,KIT,MERTK,MTOR,MYOF,NCOA3,NF1,NRP2,PFKFB3,PLCG1,PLD1,PPARG,PPP1R16B,PRKD2,PRKDC,PTPRM,RCAN2,RGS5,RPTOR,SEMA6A,SLC38A5,SP1,SPEN,STAT1,TEK,TGFBR2,TNFRSF12A,VIP,WWP2,WWTR1	53
Cell-To-Cell Signaling and Interaction,Cellular Assembly and Organization	Cell-cell contact	1.22E-10	9.91364	2.04013e-10	9.69034	2.069	ACE,AFDN,AHR,AMIGO3,AMOT,APP,AR,ARHGAP19,ATE1,ATP1A1,BOC,CBL,CBLN1,CCL5,CD177,CD34,CD93,CDON,CECR2,CHD4,CLU,CNTNAP1,CX3CL1,DAB2,DCC,DCHS1,DLGAP4,DYSF,EFNB2,EHMT2,FAT4,FLRT2,FOXO1,FST,GALNT6,HGF,HPS1,IL6,INPP5D,IQGAP1,IQSEC1,ITGA6,ITGB4,JAM2,JAM3,KALRN,KDM3B,KMT2C,KMT2E,LAMB2,LAMC1,LEF1,LIMA1,LSR,MAGI1,MARVELD2,MERTK,MMEL1,MPDZ,MTOR,MYO1C,MYO6,MYOF,NCAM2,NEDD4L,NF1,NFIA,NINJ2,NUP98,OSBP2,OSTM1,PAK…	117
Cellular Assembly and Organization	Formation of cytoskeleton	2.08E-09	8.68194	2.96719e-09	8.52765	2.069	ADGRF5,AKAP13,AKAP9,AMOT,APP,AR,ARFGEF1,ARHGAP19,ARHGAP28,ARHGEF12,ARRB1,BMX,CBL,CDC14A,CDK5RAP2,CDK6,CEP20,CGNL1,CLIP3,CNTNAP1,CORO2B,CRACD,DAB2,FCHSD2,FOXM1,HDAC6,HGF,HIP1,KDR,MAGI1,MAP3K1,MCF2L,MTOR,MTSS1,MYO1C,NF1,NFATC1,NOTCH1,NPR1,PAK3,PAM,PIK3C2B,PIK3R2,PLD1,PLXNB1,PREX1,PRKCH,PRKCQ,PRUNE1,PTPN11,PTPRB,ROCK2,SDC2,SKA1,SPHK1,TFAP2A,TGFBR2,TJP1,TNC,TNS3,TSC1,TUBB,UBAP2L,UTRN	64
Gastrointestinal Disease,Inflammatory Disease,Inflammatory Response,Organismal Injury and Abnormalities	Enteritis	4.94E-07	6.30627	5.0823e-07	6.29394	2.063	ACVR2A,ADORA3,AHR,APCDD1,APOD,BRME1,CALCRL,CCDC80,CCL5,CCR7,CD177,CD74,CEACAM21,CFB,CHRNA7,CIT,CLEC16A,CMKLR1,COL7A1,CX3CL1,DERL3,EBF1,EHMT2,EP300,ETS1,EZH2,FMO5,FOXO1,FOXP1,FRRS1,GABRP,GATA2,HDAC9,HERC2,HGF,IGFBP5,IL18R1,IL24,IL6,IL7,INPP5D,IRAK3,ITGA1,JAK1,KIT,KMT2A,KMT2C,LEF1,LRBA,MCF2L,MERTK,MT-ND6,MTOR,NAPEPLD,NEDD4L,NID1,NLRC5,NOTCH1,NPR3,NR5A2,PDE4C,PIK3CG,PLA1A,PLD1,PPARG,PRDM1,PRKN,PSMB8…	95
Neurological Disease,Organismal Injury and Abnormalities	Brain lesion	4.12E-104	103.385	6.4375e-103	102.191	2.04	AASS,ABCA3,ABCA6,ABCB7,ABCC1,ABCG2,ABR,ACBD5,ACE,ACKR3,ACVR2A,ADAMTS10,ADAMTS9,ADAR,ADARB1,ADCK1,ADCY9,ADGRA2,ADGRF5,ADRA1D,ADRA2A,ADSS1,AFAP1L1,AFDN,AFF1,AGTPBP1,AHCTF1,AHNAK2,AHR,AKAP13,AKAP9,AKR1E2,ALDH2,AMIGO3,AMOT,ANKHD1-EIF4EBP3,ANKRD20A4P (includes others),ANKRD23,ANKRD24,ANKRD28,ANKRD36,ANKRD65,ANKS1A,ANO6,APAF1,APBA1,APCDD1,APP,ARFGEF1,ARFGEF2,ARFGEF3,ARHGAP28,ARHGEF28,ARHGEF6,ARID2,ARID…	894
Cancer,Hematological Disease,Immunological Disease,Organismal Injury and Abnormalities	Tumorigenesis of lymphocytes	2.80E-47	46.5528	1.2963e-46	45.8873	2.036	AASS,ABCC1,ABCG2,ACE,ADAMTS9,ADAR,ADGRA2,ADGRF5,ADORA3,ADRA1D,AFAP1L1,AFF1,AGTPBP1,AHCTF1,AHCYL2,AHNAK2,AHR,ALDH2,AMIGO3,AMOT,ANKRD20A4P (includes others),ANKRD24,ANKRD36,ANKS1A,APBA1,APCDD1,APP,AR,ARFGEF3,ARHGEF28,ARID2,ARID4A,ASAP2,ATF7,ATP10A,ATP11A,ATP13A3,ATP7A,ATR,AXIN2,BACE2,BAZ2A,BAZ2B,BCL2L11,BCL9,BCOR,BIRC6,BMAL2,BRCA2,BRME1,CALCRL,CAMKK2,CAVIN2,CBL,CC2D2A,CCDC180,CCL5,CCR7,CD34,CD74,CD…	451
Cellular Development,Connective Tissue Development and Function,Tissue Development	Differentiation of connective tissue cells	1.63E-10	9.78781	2.68092e-10	9.57172	2.035	ACVR2A,ADAR,ADGRF5,ADK,AHR,ATAT1,AXIN2,BMAL1,BMPR2,CAST,CBL,CCL5,CCN3,CDK6,CLEC11A,CMKLR1,CNOT3,CRIM1,CYSLTR1,DYSF,EBF1,EFNB2,EP300,EZH2,FAM120B,FOXO1,FOXP1,FST,GAB2,GATA2,GPER1,HDAC6,HDAC9,HGF,HSPG2,IGFBP5,IL6,IL7,INPP5D,IRAK3,ITGA6,JARID2,LAMA4,LAMC1,LAT,LEF1,LHX6,LPIN1,LPL,LRRC8C,MAML1,MAP2K6,MECOM,MRPS18B,MTOR,NAPEPLD,NEDD9,NF1,NFATC1,NFIA,NFIB,NIPBL,NOTCH1,NR3C2,NR5A2,OSTM1,PFKFB3,PLCB1,PLCG…	99
Cardiovascular Disease,Organismal Injury and Abnormalities	Vaso-occlusion	1.78E-19	18.7496	5.05682e-19	18.2961	2.007	ABCC1,ACE,ACER2,ADGRF5,ADK,AHR,AKAP13,ALDH2,ANKS1A,APP,AR,ARHGEF12,ARID4A,ASAP2,BCAS3,BLOC1S5-TXNDC5,BMAL1,BORCS7-ASMT,C1QL3,CAMKK2,CAPS2,CARF,CCL5,CCN3,CD109,CD93,CFB,CLOCK,CLU,CX3CL1,DENND5A,DMXL2,DOCK6,DOCK8,DPP4,DSTYK,EDNRB,ENTREP1,EPS15,ERN1,ETV1,F8,FILIP1,FLI1,FLT1,FOLH1,FOXO1,GHR,GIGYF2,GUCY1A1,GUSBP1,HDAC9,HGF,HIPK3,HIVEP1,HRCT1,HSPG2,IFIH1,IGF2R,IL6,INPP5D,IQGAP2,ITGA1,ITGA2B,ITGAX,ITPR3…	174
Cardiovascular Disease,Organismal Injury and Abnormalities	Abnormal morphology of left ventricle	9.51E-09	8.02182	1.23506e-08	7.90831	2	ACE,ACKR3,ADORA3,ADRA1D,ADRA2A,ATAT1,BMX,EP300,FOXM1,HDAC9,HEY2,HSPG2,IER3,IGF2R,IL6,LAMA4,MAP3K1,MBNL1,MBNL2,MTOR,NOTCH1,NPR1,NR3C2,PBX1,PBX2,PDE9A,PHF8,PRKAA2,SHC1,TGFBR2,UTRN,VAV3	32
Cardiovascular Disease,Organismal Injury and Abnormalities	Enlargement of left ventricle	9.74E-08	7.01144	1.1194e-07	6.95101	2	ACE,ADORA3,ADRA1D,ADRA2A,ATAT1,BMX,EP300,FOXM1,HDAC9,HEY2,IER3,IGF2R,IL6,LAMA4,MBNL1,MBNL2,MTOR,NOTCH1,NPR1,NR3C2,PBX1,PBX2,PDE9A,PRKAA2,TGFBR2,UTRN,VAV3	27
Cancer,Endocrine System Disorders,Gastrointestinal Disease,Organismal Injury and Abnormalities	Pancreatic cancer	5.43E-41	40.2652	2.31064e-40	39.6363	1.99	ABCA3,ABCG2,ABR,ACKR3,ACVR2A,ADAMTS10,ADAR,ADARB1,ADORA3,ADRA2A,AFF1,AHCTF1,AHNAK2,AHR,AKAP13,AKAP9,AMOT,ANKHD1-EIF4EBP3,ANKRD24,APAF1,APP,AR,ARFGEF2,ARHGEF12,ARHGEF6,ARID2,ARSL,ATG2A,ATP10A,ATP11A,ATP2B4,ATP7A,ATP7B,ATR,AXIN2,BACE2,BAZ2A,BAZ2B,BCL2L11,BCL9,BFAR,BIRC6,BMAL1,BMPR2,BOC,BRCA2,BRME1,C22orf46P,C8orf82,CAMKK2,CARF,CBL,CCDC180,CCDC88C,CCL5,CCN3,CCNB1IP1,CCR7,CD109,CD74,CD93,CDC14A,CDC42…	381
Developmental Disorder,Organismal Injury and Abnormalities	Abnormal morphology of extraembryonic tissue	6.73E-08	7.17198	7.89906e-08	7.10242	1.981	ABI1,ACVR2A,ADAMTS9,ADAR,ADRA2A,AFDN,BCAS3,BMPR2,BRCA2,CHM,DAB2,EZH2,GATA2,LEF1,MAML1,MAML3,MECOM,MTOR,NF1,NOTCH1,NSD1,PLPP3,PTPN11,RIPK4,SETD2,SHC1,SMAD1,SMAD4,TEK,TGFBR2,UBR4,ZMIZ1	32
Cardiovascular Disease,Neurological Disease,Organismal Injury and Abnormalities	Stroke	4.97E-08	7.30364	5.90261e-08	7.22896	1.98	ABCC1,ACE,ADRA1D,ADRA2A,ALDH2,APP,AR,ATP1A1,CALCRL,CCL5,CDK6,CHRNA7,CRYBG1,CSGALNACT1,DOCK6,ELAPOR2,EPS15,F8,FILIP1,FOXN3,GABRP,GALNT18,HDAC9,IL6,ITGA2B,ITSN2,JMJD1C,KAT2B,KCNJ5,KCNQ1,KLF12,LAMC1,LCP1,LPL,LSR,MCF2L,MIDEAS,MRTFB,NAV2,NFIA,NFXL1,NR3C2,OSBPL1A,PDE11A,PDE4C,PDE7B,PDE9A,PHTF2,PIK3C2B,PLCB4,PPARG,PRKCH,PRKN,PRPF8,PTPN11,RALGAPA2,RAPGEF6,RBMS2,RPS6KA2,SCNN1B,SCNN1G,SMAD4,STAB2,STIM1,TEK…	73
Cancer,Organismal Injury and Abnormalities	Transformation of lymphatic system cells	1.84E-08	7.73518	2.29426e-08	7.63936	1.975	ANO6,ASAP1,CBL,CCN3,EBF1,EFR3A,EP300,FOXP1,GHR,IL7,INPP5D,JAK1,MECOM,NF1,OSBPL1A,PIK3R2,RASGRF2,REL,SNX29,TNFSF9	20
Cancer,Hematological Disease,Organismal Injury and Abnormalities	Myeloid or lymphoid neoplasm	6.13E-66	65.2125	4.19863e-65	64.3769	1.947	AASS,ABCA6,ABCC1,ABCG2,ABI1,ACACA,ACBD5,ACE,ACER2,ADAMTS9,ADAR,ADARB1,ADGRA2,ADGRF5,ADORA3,ADRA1D,ADSS1,AFAP1L1,AFDN,AFF1,AGTPBP1,AHCTF1,AHCYL2,AHNAK2,AHR,AKAP13,AKAP9,ALDH2,AMIGO3,AMOT,ANKHD1-EIF4EBP3,ANKRD20A4P (includes others),ANKRD24,ANKRD28,ANKRD33,ANKRD36,ANKS1A,APAF1,APBA1,APCDD1,APP,AR,ARFGEF1,ARFGEF3,ARHGAP27,ARHGAP28,ARHGEF28,ARHGEF6,ARID2,ARID4A,ARRB1,ARSL,ASAP2,ATF6B,ATF7,ATL1,ATP10A…	686
Hematological System Development and Function,Lymphoid Tissue Structure and Development,Tissue Morphology	Quantity of CD4+ T-lymphocytes	5.22E-07	6.28233	5.33742e-07	6.27267	1.938	ACACA,AHR,ARHGEF6,BCL2L11,CAMKK2,CBL,CCL5,CCR7,CD74,CYP1A1,DOCK8,ELK4,ETS1,EZH2,FLI1,FOXO1,GHR,IL6,IL7,LAT,MARCHF8,MT2A,NR3C2,NUP98,PBX1,PIK3CG,PRKACB,PRKCH,PRKCQ,PTPN11,RASSF2,RINL,RORA,SHC1,SKIC2,SPHK1,STING1,TNFSF9,TP53BP1,VIP,WWTR1	41
Digestive System Development and Function,Embryonic Development,Organismal Development	Development of gastrointestinal tract	1.90E-09	8.72125	2.72989e-09	8.56386	1.912	ABCG2,ACVR2A,AXIN2,BCL2L11,BCOR,BOC,CCDC150,CD34,CDON,CHD7,CSGALNACT1,DCHS1,EDA,EDNRB,EP300,ERN1,ETV1,FAT4,FOXM1,FOXP1,FRAS1,FST,GABRP,IFT172,IL7,IRF6,ITGA6,ITPKB,KCNQ1,KIT,LEF1,LHX6,MTMR4,NEDD9,NIPBL,PAPOLG,PHC1,PRDM1,PRKDC,PTPN11,RIPK4,RPS6KA2,SFRP1,SLC24A4,SMAD4,SPTBN1,STIM1,TBC1D32,TFAP2A,TGFBR2,TGFBR3,TIPARP,TRIM46,TRPS1,TSHZ1,VIM	56
Cell Signaling	Small GTPase mediated signal transduction	1.20E-07	6.92082	1.36054e-07	6.86629	1.912	ABR,ADRA2A,AKAP13,AMOT,ARHGAP19,ARHGAP27,ARHGAP28,ARHGEF12,ARHGEF28,ARRB1,CCDC88C,CDC42BPA,CDKL5,CDON,CGNL1,CHN1,DNMBP,DOCK8,FOXM1,GARRE1,ITPKB,KALRN,LAT,MCF2L,NF1,NOTCH1,PIK3CG,PLD1,PLEKHG1,PLXNB1,PRAG1,PREX1,PREX2,RASGRF2,RFXANK,ROCK2,RRAD,SPATA13,SPRY1,TEK,TNS3,VAV3	42
Cell Death and Survival,Organismal Injury and Abnormalities	Apoptosis of lymphocytes	5.36E-07	6.27084	5.47497e-07	6.26162	1.912	ADAR,AHR,ARRB1,BCL2L11,BIRC6,CCL5,CUL9,DOCK8,EP300,EPHA4,ETS1,FCMR,FOXP1,IER3,IFIH1,IL6,IL7,INPP5D,ITPR3,KIFAP3,KLF13,MAP2K6,MCF2L,MERTK,MT2A,MTOR,NFATC1,NOTCH1,PARP14,PIK3CG,PRKCQ,PRKDC,RCAN2,REL,SATB1,SFN,SHC1,SLC39A10,SPHK1,STAT1,STING1,TNFSF4,TSC1,TSC22D3,UBD,VAV3,VIP,WWP2,ZBTB16	49
Cell Death and Survival,Organismal Injury and Abnormalities	Cell death of lymphatic system cells	5.49E-08	7.26043	6.48936e-08	7.1878	1.901	ADAR,AHR,APAF1,ARRB1,BCL2L11,BIRC6,CBL,CCL5,CLEC11A,CUL9,DOCK8,EP300,EPHA4,ETS1,FCMR,FOXP1,IER3,IFIH1,IL6,IL7,INPP5D,ITPR3,KIFAP3,KLF13,KMT2A,LAT,MAP2K6,MCF2L,MERTK,MT2A,MTOR,NFATC1,NOTCH1,PARP14,PIK3CG,PIK3R2,PRDM1,PRKCQ,PRKD2,PRKDC,PTPN11,RCAN2,REL,SATB1,SFN,SH3BP5,SHC1,SLC39A10,SPHK1,STAT1,STING1,TGFBR2,TNFSF4,TSC1,TSC22D3,UBD,VAV3,VIP,WWP2,ZBTB16	60
Cellular Movement,Hematological System Development and Function,Immune Cell Trafficking	Cell movement of mononuclear leukocytes	1.15E-07	6.9393	1.3083e-07	6.88329	1.882	ABCC1,ACKR3,ADAR,ANO6,APOD,APP,AR,BCL9,BMPR2,CCL23,CCL5,CCN3,CCR7,CD74,CMKLR1,CSF2RB,CX3CL1,CYSLTR1,DOCK8,DPP4,EFNB2,ETS1,FLT1,FOXO1,FOXP1,GATA2,HDAC6,HGF,IL6,IL7,INPP5D,IRAK3,IRF6,ITGA1,ITGA2,ITGA6,ITGAX,JAK1,JAM3,KDR,KMT2C,LAMA4,LAT,LCP1,MAML1,MERTK,MTOR,NEDD9,NFATC1,NOTCH1,PIK3CG,PIK3R2,PLCG1,PLD1,PPARG,PRKCQ,PRKN,PSMB8,PTGDR2,PTPRB,RGS5,RORA,RPTOR,SATB1,SETD2,SHC1,SMAD4,STAT1,STING1,TGFBR2,TN…	77
Cellular Function and Maintenance,Protein Synthesis	Metabolism of protein	6.12E-10	9.21325	9.44444e-10	9.02482	1.881	ACE,ADAMTS9,ADORA3,ADRA1D,AHR,APAF1,APP,ARID2,ARRB1,ATE1,ATP7A,BACE2,BFAR,BMAL1,CAST,CBL,CCR7,CD74,CDK7,CLEC16A,CLOCK,CLU,CMKLR1,CPEB3,CPEB4,CREBRF,CSDE1,DCAF11,DDX39B,DERL3,DPP4,DROSHA,DTX4,DYSF,ECPAS,EDEM3,EIF4G3,EIF6,EP300,EPHA4,EPM2A,ERN1,EZH2,FBXW11,FOLH1,FOXN3,FOXO1,FOXP1,FST,FYCO1,GAB2,GHR,GIGYF2,GMPPA,GOLGA7,HDAC6,HERC2,HEY2,HIP1,HSPA1A,HSPG2,IDE,IER3,IGFBP5,IL6,IRAK3,ITGA2,JAK1,KLHL15,KL…	147
Cancer,Organismal Injury and Abnormalities	Growth of malignant tumor	5.92E-07	6.22768	5.99797e-07	6.222	1.86	ABCG2,ADORA3,APCDD1,AR,ARID2,ATP7A,AXIN2,BRCA2,CC2D2A,CCN3,CD34,CSDE1,DCC,DGKA,DIRAS1,DROSHA,EFNB2,EHMT2,EP300,EPAS1,EZH2,FBXW11,FOXM1,FOXO1,GNMT,GPC5,HDAC6,HGF,HSPG2,IER3,IGFBP5,IL24,IL6,IL7,INHBB,ITGA1,ITPR3,KDR,KIT,KMT2A,MAPKAPK3,MKI67,MRPS18B,MTOR,NOTCH1,PFKFB3,PIK3CG,PJA2,PLD1,PLXNB1,PPARG,PTP4A3,RASSF2,RCN3,RHOBTB2,SDC2,SEC14L2,SFRP1,SMAD4,SOX7,SP1,SPHK1,STAT1,STING1,TFF3,TGFBR2,TNC,TNFRSF1…	70
Cancer,Hematological Disease,Immunological Disease,Organismal Injury and Abnormalities	B cell cancer	1.21E-38	37.9172	5e-38	37.301	1.851	AASS,ABCC1,ABCG2,ACE,ADGRA2,ADGRF5,ADORA3,ADRA1D,AFF1,AGTPBP1,AHCTF1,AHCYL2,AHNAK2,AHR,AMIGO3,AMOT,ANKRD20A4P (includes others),ANKRD24,ANKRD36,ANKS1A,APBA1,APCDD1,APP,AR,ARFGEF3,ARHGEF28,ARID2,ARID4A,ASAP2,ATP10A,ATP11A,ATP13A3,ATP7A,ATR,BACE2,BAZ2A,BAZ2B,BCL2L11,BCOR,BIRC6,BMAL2,BRCA2,BRME1,CALCRL,CAMKK2,CAVIN2,CBL,CC2D2A,CCDC180,CCL5,CCR7,CD34,CD74,CDC14A,CDK6,CDON,CELF2,CEP120,CEP20,CHD4,CHD6…	372
Cell Death and Survival,Organismal Injury and Abnormalities	Apoptosis of leukocytes	2.17E-07	6.66354	2.35613e-07	6.6278	1.847	ADAR,ADORA3,AHR,APP,ARRB1,BCL2L11,BIRC6,CAST,CCL5,CCR7,CUL9,CX3CL1,DOCK8,DRAM2,EP300,EPHA4,ETS1,FCMR,FOXP1,IER3,IFIH1,IL6,IL7,INPP5D,IRAK3,ITPR3,KIFAP3,KLF13,MAP2K6,MCF2L,MERTK,MT2A,MTOR,NF1,NFATC1,NOTCH1,PARP14,PELI2,PIK3CG,PLCG1,PPARG,PRKCQ,PRKDC,RCAN2,REL,RPTOR,SATB1,SFN,SHC1,SLC39A10,SPHK1,ST6GAL1,STAT1,STING1,TNFRSF11A,TNFSF4,TSC1,TSC22D3,UBD,VAV3,VIP,WWP2,ZBTB16	63
Cell Morphology	Abnormal morphology of subcellular	4.05E-09	8.39254	5.51771e-09	8.25824	1.84	ABCG2,AHR,AKAP13,AKAP9,AMOT,APP,ARSG,ATAT1,ATE1,ATL1,BACE2,BCL2L11,BRCA2,CAMKK2,CAST,CBL,CBLN1,CD74,CEP120,CEP295,CFAP206,CHD4,CHM,CLCN3,CLIP3,CNTNAP1,CPEB3,CPEB4,CSGALNACT1,DCLRE1A,DYSF,FLNB,FYCO1,GEN1,GMPPA,HEY2,HSPG2,IL6,ITGA1,ITGA6,ITGA8,KALRN,KCNQ1,KMT2A,KMT2E,LAMA4,LAMB2,LAMC1,LEF1,LPIN1,MBNL1,MBNL2,MBOAT7,MDC1,MDM1,MERTK,MT-ND6,MYCBP2,NEIL2,NF1,NID1,NUP98,OSBP2,OSTM1,PLEKHM1,PRKAA2,PRKCQ,P…	101
Cardiovascular Disease,Organismal Injury and Abnormalities	Occlusion of artery	1.12E-17	16.9508	2.95515e-17	16.5294	1.838	ACE,ACER2,ADGRF5,ADK,AHR,AKAP13,ALDH2,ANKS1A,APP,AR,ARHGEF12,ARID4A,ASAP2,BCAS3,BLOC1S5-TXNDC5,BMAL1,BORCS7-ASMT,C1QL3,CAMKK2,CAPS2,CARF,CCL5,CD109,CFB,CLOCK,CLU,CX3CL1,DENND5A,DMXL2,DOCK6,DOCK8,DPP4,DSTYK,EDNRB,ENTREP1,ERN1,ETV1,F8,FLI1,FLT1,FOXO1,GHR,GIGYF2,GUCY1A1,GUSBP1,HDAC9,HGF,HIPK3,HSPG2,IFIH1,IGF2R,IL6,INPP5D,ITGA1,ITGA2B,ITGAX,JAK1,JCAD,JMJD1C,KCNJ12,KCNJ5,KDR,KIAA0040,KSR2,LAMB2,LIMA1,…	152
Cell-To-Cell Signaling and Interaction,Nervous System Development and Function	Neurotransmission	6.10E-07	6.21467	6.1554e-07	6.21074	1.838	ABR,ADARB1,AKAP9,APBA1,APP,CASK,CBLN1,CDKL5,CHRNA7,CLCN3,CNIH3,CNTNAP1,CRHBP,DMXL2,ERC1,FOXO1,GPER1,GPR176,GPRIN3,HCN3,HTR1B,JPH4,KALRN,KCND1,KCNMB4,KCNN1,KCNN3,KCTD12,MBNL2,MTOR,MYO6,NR3C2,NSF,NTSR1,PAK3,PCDH17,PCDHB13,PCDHB6,PDE7B,PHF8,PLCB4,PLCG1,POMC,PRKAR2B,PRKN,REL,ROCK2,RPS6KA2,RXRB,SHANK3,SLC12A5,SPG11,STX1A,STX3,SYBU,SYT1,TNFRSF12A,TRPV1,TSC1,UBE3A	60
Molecular Transport	Secretion of molecule	6.48E-07	6.18842	6.49299e-07	6.18756	1.825	ABCG2,ACACA,ACE,ADORA3,ADRA2A,APBA1,APP,ARRB1,ATP9A,BACE2,C1QL3,CBLN1,CCL5,CCR7,CD74,CX3CL1,DOC2B,EP300,FOXO1,FST,FZD4,GHR,HGF,HPS1,HTR1B,IL18R1,IL6,INPP5D,IQGAP1,KALRN,KCNJ5,KCNMB4,KCNQ1,MAMLD1,MAP2K6,MT-CO2,MTOR,MYO1C,MYO6,NF1,NSF,NTSR1,PAM,PC,PFKFB3,PLEKHM1,POMC,PPARG,PPFIA3,PRKCQ,PRKN,PTPN11,RAB15,RCN3,ROCK2,RPH3AL,SLC44A4,SORL1,SORT1,SPHK1,STAT1,STC1,STX1A,STX3,SYT1,TGFBR2,TRPV1,UBAP2L,UHMK1…	73
Dermatological Diseases and Conditions,Organismal Injury and Abnormalities	Disorder of hair	4.91E-09	8.30892	6.60834e-09	8.17991	1.811	ADAMTS10,ADGRA2,ADRA1D,AHR,APCDD1,AR,ARID4A,ATP7A,B3GNT5,CD74,CDON,CFB,CIB1,CLEC16A,CLIC2,CLOCK,CMKLR1,CRLF1,CSGALNACT1,DCHS1,DOCK8,EBF1,EDA,EML6,FGF11,FST,GALNT15,GATA2,GATAD2B,GSE1,GTF2H4,GTF3C1,HDAC9,HEPH,HES4,HEY2,HGF,HIF3A,HLA-DPB1,HLA-DRB1,HLA-F,HSPG2,IL18R1,IL7,INHBB,IQGAP1,IRAK3,ITGAX,ITPKB,JAK1,JMY,KALRN,KAT2B,KCNJ5,KDR,KIT,KLF8,KSR2,LAMA4,LAMB2,LAMC1,LAMC3,LCP1,LEF1,LIFR,LYPD5,MAGI1,MAM…	134
Cancer,Organismal Injury and Abnormalities	Development of head and neck tumor	6.30E-09	8.20066	8.33333e-09	8.07918	1.8	ABCG2,APP,BMAL2,BRCA2,CCDC80,CD177,CDK6,CIT,CRIP1,CSF2RB,CUL9,DROSHA,EP300,EPHA4,EZH2,FANCM,FLRT2,FST,FXYD6,GABRP,GUCY1A1,HEY2,HMCN1,HMGCS1,ITGBL1,LYPD5,MEGF9,MRAP2,MTOR,NF1,NOTCH1,NR3C2,NUAK1,PHLDA1,PLCB4,POMC,PRDM2,PXDN,RGL1,RGS5,RRAGD,SCNN1B,SDC2,SMAD4,SOX7,SPTBN1,STAT1,STAT2,TIPARP,TOP2B,VAV3,VCAN	52
Cancer,Endocrine System Disorders,Organismal Injury and Abnormalities	Development of endocrine gland tumor	2.12E-07	6.67366	2.31441e-07	6.63556	1.798	ADRA1D,ADRA2A,AHNAK2,APP,BMPR2,CCDC80,CIT,CNTNAP3B,CUL9,DACH1,DAXX,DROSHA,EIF6,EP400,EPAS1,EZH2,GOLGA6L9,GPER1,HECW2,KRT7,LAMC3,LYST,MAGI1,MAP3K1,MKI67,MT-CO1,MTHFD2,MTOR,NDUFC1,NF1,NR3C2,NSD1,POMC,PRDM2,PTPN11,RGS5,SMARCA1,SPTBN1,TOP2B,VCAN,WWP2,ZBED3	42
Cellular Development,Cellular Growth and Proliferation,Embryonic Development,Hematological System Development and Function,Hematopoiesis,Humoral Immune Response,Lymphoid Tissue Structure and Development,Organ Development,Organismal Development,Tissue Development	Development of B lymphocytes	1.51E-07	6.82102	1.69473e-07	6.7709	1.788	AFF1,BCL2L11,CBL,DOCK8,EBF1,EP300,ETS1,EZH2,FOXO1,IL6,IL7,INPP5D,ITPKB,KIT,MTOR,NCSTN,NOTCH1,PHC1,PLCG1,PPARG,PRDM1,PTPN11,REL,RORA,RPTOR,TEC,VAV3	27
Cancer,Hematological Disease,Immunological Disease,Organismal Injury and Abnormalities	Lymphocytic cancer	5.36E-49	48.2708	2.68e-48	47.5719	1.78	AASS,ABCC1,ABCG2,ACE,ADAMTS9,ADAR,ADGRA2,ADGRF5,ADORA3,ADRA1D,AFAP1L1,AFDN,AFF1,AGTPBP1,AHCTF1,AHCYL2,AHNAK2,AHR,ALDH2,AMIGO3,AMOT,ANKRD20A4P (includes others),ANKRD24,ANKRD36,ANKS1A,APBA1,APCDD1,APP,AR,ARFGEF3,ARHGAP27,ARHGEF28,ARHGEF6,ARID2,ARID4A,ARSL,ASAP2,ATF7,ATP10A,ATP11A,ATP13A3,ATP7A,ATR,AXIN2,BACE2,BAZ2A,BAZ2B,BCL2L11,BCL9,BCOR,BIRC6,BMAL2,BRCA2,BRME1,CALCRL,CAMKK2,CAND2,CAVIN2,CBL,CC2D…	511
Cancer,Hematological Disease,Organismal Injury and Abnormalities	Malignant lymphocytic neoplasm	5.36E-49	48.2708	2.68e-48	47.5719	1.78	AASS,ABCC1,ABCG2,ACE,ADAMTS9,ADAR,ADGRA2,ADGRF5,ADORA3,ADRA1D,AFAP1L1,AFDN,AFF1,AGTPBP1,AHCTF1,AHCYL2,AHNAK2,AHR,ALDH2,AMIGO3,AMOT,ANKRD20A4P (includes others),ANKRD24,ANKRD36,ANKS1A,APBA1,APCDD1,APP,AR,ARFGEF3,ARHGAP27,ARHGEF28,ARHGEF6,ARID2,ARID4A,ARSL,ASAP2,ATF7,ATP10A,ATP11A,ATP13A3,ATP7A,ATR,AXIN2,BACE2,BAZ2A,BAZ2B,BCL2L11,BCL9,BCOR,BIRC6,BMAL2,BRCA2,BRME1,CALCRL,CAMKK2,CAND2,CAVIN2,CBL,CC2D…	511
Cancer,Organismal Injury and Abnormalities	Lymphoid cancer	9.57E-49	48.0191	4.73762e-48	47.3244	1.78	AASS,ABCC1,ABCG2,ACE,ADAMTS9,ADAR,ADGRA2,ADGRF5,ADORA3,ADRA1D,AFAP1L1,AFDN,AFF1,AGTPBP1,AHCTF1,AHCYL2,AHNAK2,AHR,ALDH2,AMIGO3,AMOT,ANKRD20A4P (includes others),ANKRD24,ANKRD36,ANKS1A,APBA1,APCDD1,APP,AR,ARFGEF3,ARHGAP27,ARHGEF28,ARHGEF6,ARID2,ARID4A,ARSL,ASAP2,ATF7,ATP10A,ATP11A,ATP13A3,ATP7A,ATR,AXIN2,BACE2,BAZ2A,BAZ2B,BCL2L11,BCL9,BCOR,BIRC6,BMAL2,BRCA2,BRME1,CALCRL,CAMKK2,CAND2,CAVIN2,CBL,CC2D…	512
Connective Tissue Development and Function,Tissue Morphology	Quantity of connective tissue	1.75E-08	7.75696	2.19298e-08	7.65896	1.77	ACACA,ACE,ADRA2A,AHR,APP,AR,ARID4A,BMAL1,CAMKK2,CBL,CCDC80,CDK6,CEP120,CLEC11A,CNOT3,DOCK8,DYSF,EBF1,EIF6,EP300,EPAS1,EZH2,FLI1,FMO5,GAB2,GATA2,GHR,HERC1,HGF,HSPG2,HTR1B,IFIH1,IGF2R,IL6,INPP5D,IRAK3,ITGA2B,ITPRID2,JAM2,JARID2,KLF13,KMT2E,LAMA4,LPL,LRRC8C,MAMLD1,MKI67,MRAP2,MT2A,MTOR,NBEAL2,NF1,NOTCH1,NPFFR2,NPR3,PAM,PBX1,PIK3CG,PLCG1,PLEKHM1,POMC,PPARG,PRDM1,PRKAR2B,RASSF2,RGS5,ROCK2,RPTOR,RUNX1T…	80
Cancer,Hematological Disease,Organismal Injury and Abnormalities	Malignant myeloid neoplasm	6.37E-50	49.1959	3.30052e-49	48.4814	1.758	ABCA6,ABCC1,ABCG2,ACACA,ACBD5,ACE,ACER2,ADAMTS9,ADARB1,ADGRA2,ADGRF5,ADORA3,ADRA1D,ADSS1,AFDN,AHCYL2,AHNAK2,AKAP13,AKAP9,AMOT,ANKHD1-EIF4EBP3,ANKRD20A4P (includes others),ANKRD24,ANKRD28,ANKRD33,ANKRD36,APAF1,APCDD1,APP,AR,ARFGEF1,ARFGEF3,ARHGAP28,ARHGEF28,ARHGEF6,ARID2,ARID4A,ARRB1,ARSL,ASAP2,ATF6B,ATL1,ATP11A,ATP2B4,ATP6V1A,ATR,AXIN2,BAZ2B,BCAS3,BCL2L11,BCOR,BMAL1,BRCA2,BRME1,BTBD8,C1QL3,CALCRL…	420
Cancer,Neurological Disease,Organismal Injury and Abnormalities	Nervous system neoplasm	1.58E-105	104.801	2.98113e-104	103.526	1.757	AASS,ABCA3,ABCA6,ABCB7,ABCC1,ABCG2,ABR,ACACA,ACBD5,ACE,ACKR3,ACVR2A,ADAMTS10,ADAMTS9,ADAR,ADARB1,ADCK1,ADCY9,ADGRA2,ADGRF5,ADRA1D,ADRA2A,ADSS1,AFAP1L1,AFDN,AFF1,AGTPBP1,AHCTF1,AHNAK2,AHR,AKAP13,AKAP9,AKR1E2,ALDH2,AMIGO3,AMOT,ANKHD1-EIF4EBP3,ANKRD20A4P (includes others),ANKRD23,ANKRD24,ANKRD28,ANKRD36,ANKRD65,ANKS1A,ANO6,APAF1,APBA1,APCDD1,APP,AR,ARFGEF1,ARFGEF2,ARFGEF3,ARHGAP27,ARHGAP28,ARHGEF28,…	928
Cell Death and Survival,Organismal Injury and Abnormalities	Cell death of lymphocytes	1.31E-08	7.88273	1.67092e-08	7.77704	1.749	ADAR,AHR,APAF1,ARRB1,BCL2L11,BIRC6,CBL,CCL5,CUL9,DOCK8,EP300,EPHA4,ETS1,FCMR,FOXP1,IER3,IFIH1,IL6,IL7,INPP5D,ITPR3,KIFAP3,KLF13,LAT,MAP2K6,MCF2L,MERTK,MT2A,MTOR,NFATC1,NOTCH1,PARP14,PIK3CG,PIK3R2,PRDM1,PRKCQ,PRKD2,PRKDC,PTPN11,RCAN2,REL,SATB1,SFN,SH3BP5,SHC1,SLC39A10,SPHK1,STAT1,STING1,TGFBR2,TNFSF4,TSC1,TSC22D3,UBD,VAV3,VIP,WWP2,ZBTB16	58
Cellular Movement	Cell movement of breast cancer cell lines	3.68E-07	6.43415	3.86555e-07	6.41279	1.749	ADGRF5,AFDN,AHR,ANKS1A,AR,ARRB1,ARRDC3,ATE1,ATP7A,AXIN2,CBL,CCL5,CCN3,CPNE3,DPP4,DROSHA,ENTREP1,EP300,ERC1,ETS1,EZH2,FNBP1L,GAB2,GATAD2B,GBP1P1,GPER1,GPR176,HBP1,HGF,HIF3A,IL6,IQGAP1,ITGA2,ITGA6,ITGBL1,JMY,KCNN3,LIMA1,MBNL1,MCF2L,MRPL52,MTHFD2,MTOR,PIK3CG,PLCG1,PREX1,PRKCQ,PRKD2,PRKN,RANBP2,RHOBTB2,SASH1,SCGB3A1,SCIN,SETD2,SFN,SHC1,SMAD1,SMAD4,SOCS4,SP1,SPHK1,STC1,TFAP2A,TGFBR2,TGFBR3,TNS3,TRPS1,…	74
Dermatological Diseases and Conditions,Organismal Injury and Abnormalities	Skin lesion	8.67E-105	104.062	1.57636e-103	102.802	1.733	AASS,ABCA3,ABCA6,ABCB7,ABCC1,ABCG2,ABI1,ABR,ACBD4,ACBD5,ACE,ACKR3,ACVR2A,ADAMTS10,ADAMTS9,ADAR,ADARB1,ADCK1,ADCY9,ADGRA2,ADGRF5,ADK,ADORA3,ADSS1,AFAP1L1,AFDN,AFF1,AGTPBP1,AHCTF1,AHCYL2,AHNAK2,AHR,AKAP13,AKAP9,AKR1E2,ALDH2,AMIGO3,AMOT,ANKHD1-EIF4EBP3,ANKRD20A4P (includes others),ANKRD23,ANKRD24,ANKRD28,ANKRD33,ANKRD36,ANKS1A,ANO6,APAF1,APBA1,APCDD1,APOD,APP,AR,ARFGEF1,ARFGEF2,ARFGEF3,ARHGAP19,ARHG…	976
Cellular Development,Cellular Growth and Proliferation,Hematological System Development and Function,Hematopoiesis	Proliferation of hematopoietic progenitor cells	4.35E-08	7.36151	5.20335e-08	7.28372	1.731	ACE,BCOR,BRCA2,CBL,CCL23,CD34,CHD4,DAB2,EBF1,EPAS1,EZH2,FLI1,FOXO1,FOXP1,GATA2,IL6,IL7,ITPKB,JMJD1C,KIT,KMT2A,LEF1,LPIN1,MCF2L,MECOM,MTOR,NF1,NOTCH1,PBX1,PIK3CG,PIK3R2,PLCG1,PRDM1,PTPN11,REL,RPTOR,SAMD9L,SH2B3,SMAD4,STAT1,TNFRSF12A,TNFSF4,ZBTB16	43
Inflammatory Response	Inflammatory response	1.23E-08	7.91009	1.5749e-08	7.80275	1.722	ABCC1,ABR,ACE,ACKR3,ADAR,ADGRF5,ADORA3,AHCTF1,AHR,ANO6,APP,ATP1A1,BCL2L11,CCL23,CCL5,CCN3,CCR7,CD74,CDC14A,CLOCK,CLU,CMKLR1,CRHBP,CX3CL1,CYSLTR1,DOCK8,DPP4,DROSHA,DYSF,EDNRB,EPAS1,ERN1,ETS1,FAM76B,FLT1,FOXP1,GPER1,HDAC9,HGF,HPS1,HSPG2,IER3,IFIH1,IL24,IL6,IL7,INPP5D,IRAK3,IRF6,ITGA1,JAK1,JAM3,KDR,KIT,KMT2E,LAMP3,LAT,LCP1,LEF1,LPL,LTBP1,LYST,MECOM,MT-CO1,MT-ND6,MTOR,NAPEPLD,NCOA3,NEDD9,NLRC5,NOTCH1…	118
Endocrine System Disorders,Gastrointestinal Disease,Organismal Injury and Abnormalities	Pancreatic lesion	1.24E-43	42.9066	5.51111e-43	42.2588	1.718	ABCA3,ABCG2,ABR,ACBD5,ACKR3,ACVR2A,ADAMTS10,ADAR,ADARB1,ADCY9,ADGRA2,ADORA3,ADRA2A,AFF1,AHCTF1,AHNAK2,AHR,AKAP13,AKAP9,AMOT,ANKHD1-EIF4EBP3,ANKRD20A4P (includes others),ANKRD24,APAF1,APP,AR,ARFGEF2,ARHGAP28,ARHGEF12,ARHGEF6,ARID2,ARSL,ATG2A,ATP10A,ATP11A,ATP2B4,ATP7A,ATP7B,ATR,AXIN2,BACE2,BAZ2A,BAZ2B,BCL2L11,BCL9,BEND4,BFAR,BIRC6,BMAL1,BMPR2,BOC,BRCA2,BRME1,C22orf46P,C8orf82,CAMKK2,CARF,CBL,CCDC1…	425
Cancer,Organismal Injury and Abnormalities	Transformation of lymphocytes	4.87E-09	8.31247	6.56334e-09	8.18287	1.709	ANO6,ASAP1,CBL,CCN3,EBF1,EFR3A,EP300,FOXP1,GHR,IL7,INPP5D,JAK1,NF1,OSBPL1A,PIK3R2,RASGRF2,REL,SNX29,TNFSF9	19
Cancer,Organismal Injury and Abnormalities	Connective tissue tumor	5.13E-16	15.2899	1.24213e-15	14.9058	1.701	ACACA,ADK,ADRA1D,AFAP1L1,AFF1,AHCTF1,AHNAK2,AKAP13,AR,ARFGEF3,ARID2,ARID4A,ASAP2,ATP2B4,ATR,AXIN2,BCL2L11,BCOR,BMPR2,BRCA2,C22orf46P,CBL,CC2D2A,CCDC150,CD34,CDK6,CDK7,CHD4,CHM,COL7A1,COL9A3,CSF2RB,CSMD2,CUL9,DACH1,DAXX,DCC,DCLRE1A,DOCK6,DOP1B,DPP4,ECPAS,EHMT2,EIF4G3,EPM2A,EPS15,ETV1,EZH2,FILIP1,FLI1,FLNB,FLT1,FOXM1,FOXO1,FOXP1,GABRP,GPER1,GPRIN3,GSE1,HDAC6,HECW2,HERC1,HGF,HMGCS1,HRCT1,HSPG2,HTR1B…	190
Cancer,Organismal Injury and Abnormalities	Malignant connective or soft tissue neoplasm	5.24E-26	25.2807	1.72937e-25	24.7621	1.7	ABCA3,ACACA,ACE,ADGRF5,ADRA1D,AFAP1L1,AFF1,AGTPBP1,AHCTF1,AHNAK2,AKAP13,ANKRD23,ANKRD33,AR,ARFGEF1,ARFGEF3,ARID2,ARID4A,ASAP2,ATP2B4,ATP7A,ATP9A,ATR,AXIN2,BCOR,BMPR2,BRCA2,BTBD3,BTBD8,C22orf46P,C2CD2,CBL,CC2D2A,CCDC150,CCSER2,CD34,CD93,CDK6,CDK7,CECR2,CELF1,CEP170,CEP192,CHD4,CHD7,CHM,CHRNA7,CHURC1-FNTB,CIB1,CNOT6L,CSF2RB,CSMD2,CUL9,DACH1,DAXX,DCC,DCLRE1A,DLGAP4,DOCK6,DOCK8,DOP1B,DROSHA,DYNC2H1,E…	289
Cancer,Hematological Disease,Organismal Injury and Abnormalities	Bone marrow neoplasm	3.60E-49	48.4437	1.82741e-48	47.7382	1.699	ABCA6,ABCC1,ABCG2,ABI1,ACACA,ACBD5,ACE,ACER2,ADAMTS9,ADARB1,ADGRA2,ADGRF5,ADORA3,ADRA1D,ADSS1,AFDN,AHCYL2,AHNAK2,AKAP13,AKAP9,AMOT,ANKHD1-EIF4EBP3,ANKRD20A4P (includes others),ANKRD24,ANKRD28,ANKRD33,ANKRD36,APAF1,APCDD1,APP,AR,ARFGEF1,ARFGEF3,ARHGAP28,ARHGEF28,ARHGEF6,ARID2,ARID4A,ARRB1,ARSL,ASAP2,ATF6B,ATL1,ATP11A,ATP2B4,ATP6V1A,ATR,AXIN2,BAZ2B,BCAS3,BCL2L11,BCOR,BMAL1,BMPR2,BRCA2,BRME1,BTBD8,C…	427
Cancer,Hematological Disease,Organismal Injury and Abnormalities	Myeloid neoplasm	6.33E-48	47.1986	3.02871e-47	46.5187	1.699	ABCA6,ABCC1,ABCG2,ABI1,ACACA,ACBD5,ACE,ACER2,ADAMTS9,ADARB1,ADGRA2,ADGRF5,ADORA3,ADRA1D,ADSS1,AFDN,AHCYL2,AHNAK2,AKAP13,AKAP9,AMOT,ANKHD1-EIF4EBP3,ANKRD20A4P (includes others),ANKRD24,ANKRD28,ANKRD33,ANKRD36,APAF1,APCDD1,APP,AR,ARFGEF1,ARFGEF3,ARHGAP28,ARHGEF28,ARHGEF6,ARID2,ARID4A,ARRB1,ARSL,ASAP2,ATF6B,ATL1,ATP11A,ATP2B4,ATP6V1A,ATR,AXIN2,BAZ2B,BCAS3,BCL2L11,BCOR,BMAL1,BMPR2,BRCA2,BRME1,BTBD8,C…	427
Cancer,Organismal Injury and Abnormalities	Extraadrenal retroperitoneal tumor	9.25E-57	56.0339	5.28571e-56	55.2769	1.685	ABCA3,ABCG2,ABR,ACBD5,ACKR3,ACVR2A,ADAMTS10,ADAMTS9,ADAR,ADARB1,ADCY9,ADGRA2,ADGRF5,ADORA3,ADRA2A,ADSS1,AFDN,AFF1,AHCTF1,AHNAK2,AHR,AKAP13,AKAP9,ALDH2,AMOT,ANKHD1-EIF4EBP3,ANKRD20A4P (includes others),ANKRD24,ANKRD36,APAF1,APOD,APP,AR,ARFGEF2,ARFGEF3,ARHGAP28,ARHGEF12,ARHGEF6,ARID2,ARSL,ASAP1,ATF7,ATG2A,ATP10A,ATP11A,ATP13A3,ATP2B4,ATP7A,ATP7B,ATR,AXIN2,BACE2,BAZ2A,BAZ2B,BCL2L11,BCL9,BCOR,BEND4,B…	558
Inflammatory Response	Immune response of cells	8.34E-09	8.07883	1.0915e-08	7.96197	1.673	ABI1,ABR,ACE,ADAR,ADORA3,AHR,APP,ASAP2,ATAT1,ATP1A1,ATR,BCL2L11,CBL,CCR7,CD74,CD93,CFB,CHN1,CLCN3,CSF2RB,CX3CL1,DOCK8,DYSF,ERN1,ETS1,FCMR,FLRT2,FOXO1,FOXP1,GAB2,GATA2,HGF,IFIH1,IL18R1,IL6,IL7,INPP5D,IQGAP1,IQSEC1,ITGAX,JAK1,LAT,LTBP1,MACF1,MBNL1,MERTK,MID2,MTMR4,MTOR,NF1,NRP2,OSBP2,PFKFB3,PIK3CG,PLCG1,PLD1,POLA1,POMC,PPARG,PRDM1,PRKAA2,PRKD2,PSMB8,PTPN11,REL,RGS5,RORA,RPTOR,SLC7A8,SPHK1,SPRY1,STA…	88
Cellular Growth and Proliferation,Tissue Development	Proliferation of neural cells	3.67E-09	8.43533	5.0551e-09	8.29627	1.672	AFDN,AHR,APP,AR,ARFGEF1,CAMKK2,CCL5,CDC42BPA,CDK6,CDKL5,CDON,CELF2,CHD4,CHN1,CLU,CX3CL1,CYSLTR1,DCC,DLGAP4,EDNRB,EFNB2,EP300,EPAS1,EPM2A,FLT1,FOXO1,FRS2,GAB2,GATA2,HGF,HMGCS1,IDE,IGFBP5,IL24,IL6,IQGAP1,IRX5,ITGA1,ITGA6,KALRN,KDM2B,KDR,KIT,LAMA4,LIFR,MAML1,MAML3,MARCHF8,MIOS,MT2A,MTOR,NCAM2,NCDN,NEDD4L,NF1,NFIA,NFIB,NINJ2,NOTCH1,PDE9A,PJA2,PKP4,PLD1,PPARG,PRAG1,PRKAA2,PRKCH,PTPN11,PTPRM,RAPH1,REL,…	96
Cellular Movement	Cell movement of cancer cells	4.20E-08	7.37675	5.03597e-08	7.29792	1.667	CCL5,CCN3,CCR7,CD74,CSDE1,DPP4,EZH2,FLT1,FOXM1,GAB2,HGF,IL6,IL7,IQGAP1,KDR,MAP3K1,NEDD9,NOTCH1,PEAK1,PTPN11,S100A2,SFRP1,SPHK1,ST6GAL1,STAT1,TNC,VCAN,VIM,ZBTB16	29
Cancer,Organismal Injury and Abnormalities	Neoplasia of cells	8.80E-79	78.0555	7.85714e-78	77.1047	1.666	AASS,ABCA6,ABCC1,ABCG2,ABI1,ABR,ACACA,ACBD5,ACE,ACER2,ACVR2A,ADAMTS10,ADAMTS9,ADAR,ADARB1,ADCY9,ADGRA2,ADGRF5,ADORA3,ADRA1D,ADSS1,AFAP1L1,AFDN,AFF1,AGTPBP1,AHCTF1,AHCYL2,AHNAK2,AHR,AKAP13,AKAP9,ALDH2,AMIGO3,AMOT,ANKHD1-EIF4EBP3,ANKRD20A4P (includes others),ANKRD24,ANKRD28,ANKRD33,ANKRD36,ANKRD65,ANKS1A,ANO6,APAF1,APBA1,APCDD1,APOD,APP,AR,ARFGEF1,ARFGEF2,ARFGEF3,ARHGAP28,ARHGEF12,ARHGEF28,ARHGEF6,…	876
Cancer,Neurological Disease,Organismal Injury and Abnormalities	Central nervous system solid tumor	4.56E-104	103.341	7.01538e-103	102.154	1.66	AASS,ABCA3,ABCA6,ABCB7,ABCC1,ABCG2,ABR,ACACA,ACBD5,ACE,ACKR3,ACVR2A,ADAMTS10,ADAMTS9,ADAR,ADARB1,ADCK1,ADCY9,ADGRA2,ADGRF5,ADRA1D,ADRA2A,ADSS1,AFAP1L1,AFDN,AFF1,AGTPBP1,AHCTF1,AHNAK2,AHR,AKAP13,AKAP9,AKR1E2,ALDH2,AMIGO3,AMOT,ANKHD1-EIF4EBP3,ANKRD20A4P (includes others),ANKRD23,ANKRD24,ANKRD28,ANKRD36,ANKRD65,ANKS1A,ANO6,APAF1,APBA1,APCDD1,APP,AR,ARFGEF1,ARFGEF2,ARFGEF3,ARHGAP28,ARHGEF28,ARHGEF6,A…	917
Cancer,Organismal Injury and Abnormalities	Connective or soft tissue tumor	5.22E-44	43.2823	2.34081e-43	42.6306	1.657	ABCA3,ABCA6,ABCC1,ABCG2,ACACA,ACE,ADAMTS10,ADAR,ADARB1,ADGRF5,ADK,ADRA1D,AFAP1L1,AFF1,AGTPBP1,AHCTF1,AHNAK2,AHR,AKAP13,AKAP9,AKR1E2,ANKRD23,ANKRD24,ANKRD33,ANKRD36,ANKRD65,ANKS1A,APOLD1,AR,ARFGEF1,ARFGEF2,ARFGEF3,ARHGAP19,ARHGEF28,ARID2,ARID4A,ARSG,ARSL,ASAP1,ASAP2,ATG2A,ATP10A,ATP11A,ATP2B4,ATP7A,ATP7B,ATP9A,ATR,AXIN2,BAZ2B,BCAS3,BCL2L11,BCL9,BCOR,BDH1,BFAR,BIRC6,BMAL2,BMPR2,BRCA2,BRME1,BTBD3,BT…	595
Cellular Development,Cellular Growth and Proliferation,Hematological System Development and Function,Hematopoiesis	Proliferation of hematopoietic cells	2.15E-08	7.66756	2.65105e-08	7.57658	1.651	ACE,BCOR,BRCA2,CBL,CCL23,CD34,CHD4,CSF2RB,DAB2,EBF1,EPAS1,EZH2,FLI1,FOXO1,FOXP1,GATA2,IL6,IL7,ITPKB,JAK1,JMJD1C,KIT,KMT2A,LEF1,LPIN1,MCF2L,MECOM,MTOR,NF1,NOTCH1,PBX1,PIK3CG,PIK3R2,PLCG1,PRDM1,PTPN11,REL,RPTOR,SAMD9L,SH2B3,SMAD4,STAT1,TNFRSF12A,TNFSF4,ZBTB16	45
Cancer,Organismal Injury and Abnormalities	Development of malignant tumor	3.69E-115	114.433	1.08529e-113	112.964	1.644	AASS,ABCA3,ABCA6,ABCB7,ABCC1,ABCG2,ABI1,ABR,ACBD4,ACBD5,ACE,ACER2,ACKR3,ACVR2A,ADAMTS10,ADAMTS9,ADAR,ADARB1,ADCK1,ADCY9,ADGRA2,ADGRF5,ADK,ADORA3,ADRA1D,ADSS1,AFAP1L1,AFDN,AFF1,AGTPBP1,AHCTF1,AHCYL2,AHNAK2,AHR,AKAP13,AKAP9,ALDH2,AMIGO3,AMOT,ANKHD1-EIF4EBP3,ANKRD20A4P (includes others),ANKRD23,ANKRD24,ANKRD28,ANKRD36,ANKRD65,ANKS1A,ANO6,APAF1,APBA1,APCDD1,APOD,APP,AR,ARFGEF1,ARFGEF2,ARFGEF3,ARHGAP1…	1037
Cellular Function and Maintenance,Inflammatory Response	Phagocytosis	9.24E-08	7.03433	1.06452e-07	6.97285	1.634	ABI1,ABR,ACE,ADAR,APP,ASAP2,ATAT1,ATG2A,CBL,CD93,CFB,CHN1,CLCN3,CLEC16A,CSF2RB,CX3CL1,DOCK8,DYSF,FCMR,FLRT2,FOXP1,FYCO1,GAB2,GATA2,HDAC6,HGF,IL6,INPP5D,IQGAP1,IQSEC1,JAK1,LAT,MBNL1,MERTK,MTMR4,NF1,NRP2,OSBP2,OSTM1,PFKFB3,PLD1,PPARG,PRKAA2,PRKD2,RGS5,RORA,RPTOR,SLC7A8,SPHK1,STAB2,STAT1,STIM1,STING1,SUPT20H,TLR1,USP22,VCP,VIM,VIP,VWF,WASHC5,ZMYND8	62
Cancer,Organismal Injury and Abnormalities,Renal and Urological Disease	Urinary tract tumor	6.34E-69	68.1979	4.76692e-68	67.3218	1.633	ABCA6,ABCC1,ABCG2,ABR,ACBD5,ACE,ACVR2A,ADAMTS9,ADAR,ADARB1,ADCK1,ADGRA2,ADGRF5,ADORA3,ADSS1,AFDN,AGTPBP1,AHNAK2,AHR,AKAP13,AKAP9,AKR1E2,ALDH2,AMOT,ANKRD24,ANKRD33,ANKRD36,ANKS1A,ANO6,APAF1,APBA1,APOD,APP,AR,ARFGEF3,ARHGAP19,ARHGAP27,ARHGEF28,ARID2,ARID4A,ARSL,ASAP1,ATE1,ATF7,ATG2A,ATL1,ATP10A,ATP11A,ATP13A3,ATP1A1,ATP2B4,ATP7A,ATP9A,ATR,AXIN2,BCAS3,BCL2L11,BCL9,BCOR,BFAR,BICRAL,BIRC6,BMAL1,BOC,BR…	675
Cellular Development,Cellular Growth and Proliferation,Hematological System Development and Function,Hematopoiesis,Lymphoid Tissue Structure and Development,Tissue Development	Differentiation of myeloid leukocytes	5.55E-07	6.25571	5.65749e-07	6.24738	1.617	AHR,APP,ARID4A,CBL,CCL23,CD74,CDK6,CLEC11A,CSF2RB,CYSLTR1,FLRT2,FOXP1,GAB2,GATA2,GMPR2,HGF,HLA-DRB1,IL6,IL7,INPP5D,KIT,KMT2A,KMT2E,LEF1,MTOR,NFATC1,NOTCH1,OSTM1,PFKFB3,PPARG,PRDM1,PTPN11,REL,RPTOR,RUNX1T1,SH2B3,SHC1,ST6GAL1,ST8SIA1,STAT1,TLR1,TLR6,TSC1,VPS13A	44
Cell-To-Cell Signaling and Interaction,Hematological System Development and Function,Immune Cell Trafficking,Inflammatory Response	Activation of mononuclear leukocytes	4.16E-07	6.38091	4.32882e-07	6.36363	1.614	ADRA2A,AHR,ANO6,BCL2L11,CCL5,CCR7,CD74,CD93,CHRNA7,CSF2RB,CYSLTR1,DPP4,EBF1,EFNB2,ETS1,FBXO38,FOXD1,FOXO1,FOXP1,HDAC6,HDAC9,HGF,HLA-DPB1,HLA-DRB1,HPS1,HSPA1A,IGF2R,IL18R1,IL24,IL6,IL7,INPP5D,IRAK3,IRF6,ITGA1,ITPKB,JPH4,KMT2C,LAT,LYST,MERTK,MICB,MTOR,NOTCH1,NR5A2,PBX1,PIK3CG,PLCB1,PLCB4,PLXNB1,PPARG,PRDM1,PRKCQ,PTGDR2,REL,SATB1,SKIC2,SMAD4,SPRY1,ST6GAL1,STAT1,STING1,TGFBR2,TLR1,TNC,TNFSF4,TNFSF9,T…	70
Inflammatory Disease,Organismal Injury and Abnormalities	Chronic inflammatory disorder	2.94E-17	16.5317	7.5969e-17	16.1194	1.609	ACE,ACVR2A,ADK,ADORA3,ADRA1D,ADRA2A,AHR,ANKRD23,APCDD1,APOD,AR,ARRB1,ASAP1,ATF7,BCL2L11,BMAL1,BRME1,BTBD8,CALCRL,CCDC80,CCL23,CCL5,CCR7,CD177,CD74,CDK5RAP2,CDK6,CFB,CIT,CLEC16A,CLIC2,CLU,CMKLR1,COL7A1,CPEB4,CSF2RB,CSGALNACT1,CX3CL1,CYP1A1,CYSLTR1,DAXX,DERL3,DOCK8,DPP4,EBF1,EDNRB,EHMT2,EP300,EPAS1,EPS15,ETS1,EZH2,FBXL7,FCHSD2,FIP1L1,FLT1,FMO5,FOXO1,FOXP1,FRRS1,GABRP,GATA2,GHR,GPANK1,GPC5,GPER1,GRA…	222
Cellular Development,Skeletal and Muscular System Development and Function,Tissue Development	Differentiation of muscle	6.15E-09	8.21112	8.1565e-09	8.0885	1.609	ABCG2,AKAP13,ANKRD33,ATP11A,BCL9,BMAL1,BMPR2,BOC,CCN3,CDON,DAXX,EDNRB,EFNB2,EHMT2,EZH2,FOXO1,FOXP1,FRS2,GPER1,HDAC9,HEY2,HGF,IGFBP5,IL6,ITGA6,ITGA8,JAK1,KIT,LAMC1,MAML1,MAP2K6,MBNL1,MRTFB,MTOR,NFATC1,NOTCH1,NR2C2,PFKFB3,PLCB1,PPARG,PRKD2,PTPN11,REST,RORA,RPTOR,RXRB,SFRP1,SHC1,SMAD1,SMAD4,SORT1,SP1,STAT1,STIM1,TGFBR2,TNFRSF12A,TRIM27,TRIM32,TSC1,ZBED6	60
Cellular Movement,Hair and Skin Development and Function	Cell movement of epithelial cell lines	8.17E-10	9.08778	1.24164e-09	8.906	1.607	AHR,AKAP9,ANKS1A,APBA1,APP,ARHGEF12,CBL,CCL5,CDC42BPA,CLU,DPP4,FOXO1,GAB2,HDAC6,HGF,ITGA1,ITGA2,ITGB4,JOSD1,KLF8,LIFR,MAP2K6,MBNL1,MERTK,PANK4,PEAK1,PIK3C2B,PLXNB1,PTGDR2,PTP4A3,RORA,RPTOR,SHC1,SMAD4,SP1,SPHK1,TGFBR3,TNFRSF11A,TNS3,TSC22D3,VIM,WWTR1	42
Ophthalmic Disease,Organismal Injury and Abnormalities	Posterior segment anomalies	2.49E-16	15.6038	6.11794e-16	15.2134	1.602	ACBD5,ADRA1D,ADRA2A,AHR,APAF1,APP,AR,ARFGEF1,ARSG,CAVIN2,CBL,CC2D2A,CD109,CELF2,CEP290,CFB,CHM,CLCN3,CLU,COL9A3,CRLF1,CROCCP3,CSF2RB,DCC,DRAM2,DYNC2H1,EDNRB,EPAS1,FAM161A,FAM8A1,FANCM,FAT4,FLT1,FMC1-LUC7L2,FST,FZD4,GHR,GIGYF2,GUCY1A1,HDAC6,HDAC9,HERC2,HGF,HLA-C,HMCN1,HSPG2,IFT172,IL6,IRX5,ITGA2,ITGA6,ITGAX,JAK1,KCNN3,KCNQ1,KDR,KIAA1549,KIT,LAMA4,LAMB2,LAMC1,LPIN1,LPL,LTBP1,MACF1,MAPKAPK3,MED12,ME…	137
Ophthalmic Disease,Organismal Injury and Abnormalities	Disease of retina	4.95E-16	15.3054	1.20438e-15	14.9192	1.602	ACBD5,ADRA1D,ADRA2A,AHR,APAF1,APP,AR,ARFGEF1,ARSG,CAVIN2,CBL,CC2D2A,CD109,CELF2,CEP290,CFB,CHM,CLCN3,CLU,COL9A3,CRLF1,CROCCP3,CSF2RB,DCC,DRAM2,DYNC2H1,EDNRB,EPAS1,FAM161A,FAM8A1,FANCM,FAT4,FLT1,FMC1-LUC7L2,FST,FZD4,GHR,GIGYF2,GUCY1A1,HDAC6,HDAC9,HERC2,HGF,HLA-C,HMCN1,HSPG2,IFT172,IL6,IRX5,ITGA2,ITGA6,ITGAX,KCNN3,KCNQ1,KDR,KIAA1549,KIT,LAMA4,LAMB2,LAMC1,LPIN1,LPL,LTBP1,MACF1,MAPKAPK3,MED12,MEGF9,M…	136
Cellular Development	Differentiation of tumor cell lines	5.02E-11	10.2993	8.71528e-11	10.0597	1.602	AHR,APP,BMPR2,BMX,CBL,CCN3,CDK6,CSF2RB,CTDSPL,CX3CL1,DAB2,DPP4,DRAM2,EP300,EPAS1,EZH2,FLI1,FOXP1,FRS2,FST,GATA2,GSE1,HGF,IGFBP5,IL24,IL6,INPP5D,JAK1,KAT2B,KIT,KMT2A,KSR2,LIFR,MAP2K6,MCC,MTOR,NFATC1,NOTCH1,NTSR1,PLCB1,PPARG,PPP1R16B,PRDM1,PRKAR2B,PRKCH,PTPN11,RBFOX2,RUNX1T1,SCIN,SHC1,SMAD1,SMAD4,SORT1,SPHK1,ST8SIA1,ST8SIA4,STAT1,STIM1,TFAP2A,TNC,TNFRSF11A,TRIM16,VCAN	63
Cellular Function and Maintenance	Metabolism of macromolecule	3.79E-09	8.42136	5.18468e-09	8.28528	1.588	ABCB7,ACE,ADAMTS9,ADORA3,ADRA1D,ADRA2A,AHR,APAF1,APP,ARID2,ARRB1,ATE1,ATP7A,ATR,BACE2,BFAR,BMAL1,BMX,BRCA2,CAST,CBL,CCR7,CD74,CDK7,CECR2,CLEC16A,CLOCK,CLU,CMKLR1,CNOT6L,CPEB3,CPEB4,CREBRF,CSDE1,DCAF11,DDX39B,DERL3,DPP4,DROSHA,DTX4,DYSF,ECPAS,EDEM3,EHMT2,EIF4G3,EIF6,EP300,EPHA4,EPM2A,ERN1,EZH2,FANCM,FBXW11,FOLH1,FOXM1,FOXN3,FOXO1,FOXP1,FST,FYCO1,GAB2,GHR,GIGYF2,GMPPA,GOLGA7,HDAC6,HERC2,HEY2,HIP1,H…	174
Cardiovascular Disease,Organismal Injury and Abnormalities	Atherosclerosis	1.41E-16	15.8508	3.50746e-16	15.455	1.583	ACE,ACER2,ADGRF5,ADK,AHR,AKAP13,ALDH2,ANKS1A,APP,AR,ARHGEF12,ARID4A,ASAP2,BCAS3,BLOC1S5-TXNDC5,BMAL1,BORCS7-ASMT,C1QL3,CAMKK2,CAPS2,CARF,CCL5,CD109,CFB,CLOCK,CLU,CX3CL1,DENND5A,DMXL2,DOCK6,DOCK8,DPP4,DSTYK,EDNRB,ENTREP1,ERN1,ETV1,FLI1,FLT1,FOXO1,GHR,GIGYF2,GUCY1A1,GUSBP1,HDAC9,HGF,HIPK3,HSPG2,IFIH1,IGF2R,IL6,INPP5D,ITGA1,ITGAX,JCAD,JMJD1C,KCNJ12,KCNJ5,KDR,KIAA0040,KSR2,LAMB2,LPL,MAGI1,MAST4,MCF2L…	140
Cellular Development,Skeletal and Muscular System Development and Function,Tissue Development	Differentiation of muscle cells	1.21E-07	6.91721	1.36723e-07	6.86416	1.582	ABCG2,AKAP13,ANKRD33,ATP11A,BCL9,BOC,CCN3,CDON,DAXX,EDNRB,EFNB2,EZH2,FOXO1,FOXP1,FRS2,GPER1,HDAC9,HEY2,HGF,IGFBP5,IL6,ITGA6,ITGA8,JAK1,KIT,LAMC1,MAML1,MAP2K6,MBNL1,MRTFB,MTOR,NFATC1,NOTCH1,NR2C2,PFKFB3,PLCB1,PPARG,PRKD2,PTPN11,REST,RORA,RXRB,SHC1,SMAD1,SMAD4,SORT1,SP1,STAT1,STIM1,TGFBR2,TNFRSF12A,TRIM27,TSC1	53
Cellular Development,Cellular Growth and Proliferation,Hair and Skin Development and Function	Proliferation of epithelial cell lines	1.01E-07	6.99568	1.15826e-07	6.9362	1.581	ADRA1D,AKAP13,AR,ARRB1,BCL2L11,BMAL2,BRCA2,CDK6,CLU,CYP1A1,DAB2,EHMT2,EZH2,FOXM1,FOXO1,GAB2,HDAC6,HGF,HSPA1A,IER3,IGFBP5,IL6,IQGAP2,ITGA2,ITPR3,KLF8,MGA,MTOR,NEDD4L,NOTCH1,OSBP2,PARP14,PBX1,PTP4A3,RPTOR,RYBP,SAMD9L,SEC14L2,SFRP1,SMAD4,SP1,TFAP2A,TGFBR2,TGFBR3,TNFRSF11A,TNS3,TP53BP1,TRIM39,TSC1,TSC22D3,UNC5A,UNC5C,WWTR1	53
Cancer,Cellular Development,Cellular Growth and Proliferation,Organismal Injury and Abnormalities,Tumor Morphology	Proliferation of tumor cells	4.19E-07	6.37779	4.35551e-07	6.36096	1.58	ABCG2,ADORA3,APCDD1,AR,ARRDC3,AXIN2,BMPR2,CCN3,CD34,CDK6,CSDE1,DCC,DGKA,DIRAS1,DROSHA,EHMT2,EPAS1,ETS1,EZH2,FBXW11,FOXM1,FOXO1,FST,GPC5,HDAC6,HGF,HSPA1A,HSPG2,IER3,IGFBP5,IL24,IL6,IL7,INHBB,ITGA1,KDR,KIT,KMT2A,MKI67,MTOR,NEDD9,NF1,NOTCH1,PFKFB3,PIK3CG,PLD1,PPARG,PRDM1,PTPN11,RASSF2,RCN3,RHOBTB2,SDC2,SEC14L2,SFRP1,SMAD4,SOX7,SP1,SPHK1,STAT1,TFF3,TGFBR2,TNFRSF11A,TNFRSF12A,USP33,VCAN	66
Cancer,Hematological Disease,Organismal Injury and Abnormalities	Myeloproliferative neoplasm	4.60E-08	7.33724	5.48926e-08	7.26049	1.577	ABI1,APAF1,APP,ARID4A,ARRB1,BCL2L11,BCOR,BMAL1,BMPR2,CBL,CCL5,CSF2RB,EHMT2,EP300,EPAS1,EZH2,FAT4,FLT1,FMC1-LUC7L2,FOXO1,FOXP1,GATA2,IFIH1,IL6,INPP5D,ITGA2B,ITPKB,JAK1,JARID2,KDR,KIT,KMT2A,KMT2C,KMT2E,LAT,MAML1,MAP3K1,MECOM,MTOR,NCSTN,NF1,NOTCH1,NUP98,PDE4C,PDE7B,PIK3R2,POLA1,PTPN11,RXRB,SAMD9,SAMD9L,SH2B3,SPATA6L,TEC,TEK,TOP2B,VWF	57
Cellular Development,Cellular Growth and Proliferation,Hematological System Development and Function,Lymphoid Tissue Structure and Development	Cell proliferation of T lymphocytes	9.19E-09	8.03668	1.19661e-08	7.92205	1.573	ABI1,ADK,AHR,AKAP13,ANO6,ARHGEF6,ATF6B,BCOR,CBL,CCL5,CCR7,CD74,CDK6,CSF2RB,DGKA,DOCK8,DPP4,DUSP14,EFNB2,ETS1,FOXO1,FOXP1,GAB2,HLA-DPB1,HLA-DRB1,HSPA1A,IL6,IL7,INPP5D,IQGAP1,ITGA2B,ITGAX,KDR,KIT,LAT,LCP1,LTBP1,MAP2K6,MARCHF8,MCF2L,MERTK,MTHFD2,MTOR,NCSTN,NF1,NFATC1,NOTCH1,NR5A2,NUP98,PIK3CG,PIK3R2,PLCG1,PLD1,POMC,PPARG,PPL,PRDM1,PRKCH,PRKCQ,PTPN11,PTPRCAP,RASGRF2,RCAN2,REL,RPTOR,SATB1,SHC1,SKIC2,S…	85
Cancer,Organismal Injury and Abnormalities,Respiratory Disease	Development of lung tumor	8.72E-34	33.0595	3.31559e-33	32.4794	1.571	ABCB7,ACVR2A,ADAR,ADRA1D,AFDN,AGTPBP1,AHCTF1,AHNAK2,AHR,AKAP13,AKAP9,ANKRD24,ANKRD28,APBA1,APOD,AR,ARFGEF1,ARFGEF2,ARHGAP28,ARHGEF12,ARHGEF6,ARID2,ARRB1,ATE1,ATG2A,ATP10A,ATP7B,ATR,AXIN2,BACE2,BAZ2A,BCAS3,BCOR,BDH1,BEND4,BICRAL,BIRC6,BMAL2,BMX,BRCA2,CAMKK2,CAND2,CBL,CBLN1,CCDC150,CCDC180,CCDC80,CCNB1IP1,CD34,CECR2,CEP120,CEP170,CEP192,CEP290,CEP295,CFAP206,CFAP96,CHD6,CIT,CLEC16A,CNOT3,CNTNAP1,CO…	362
Hematological System Development and Function,Hematopoiesis	Development of hematopoietic system	1.39E-08	7.85699	1.76172e-08	7.75406	1.569	ABCG2,ABI1,ACKR3,ADAR,ARID4A,BCL2L11,CBL,CCL23,CD74,CIB1,CLEC11A,CSF2RB,EBF1,EIF6,EP400,ETS1,EZH2,FANCB,FLI1,FOXO1,FST,GATA2,IL6,IL7,INPP5D,JAK1,KIT,KMT2A,KMT2E,LAT,MAML1,MECOM,MERTK,MTOR,NOTCH1,PBX1,PLCG1,PPARG,PRDM1,PTPN11,REL,RORA,RPTOR,SATB1,SCIN,SH2B3,SHC1,SLC39A10,SP1,STAT1,TEK,TNFRSF11A,TNFSF9,VAV3	54
Cancer,Neurological Disease,Organismal Injury and Abnormalities	Glioma	2.85E-106	105.545	5.81633e-105	104.235	1.556	AASS,ABCA3,ABCA6,ABCB7,ABCC1,ABCG2,ABR,ACACA,ACBD5,ACE,ACKR3,ACVR2A,ADAMTS10,ADAMTS9,ADAR,ADARB1,ADCK1,ADCY9,ADGRA2,ADGRF5,ADRA1D,ADSS1,AFAP1L1,AFDN,AFF1,AGTPBP1,AHCTF1,AHNAK2,AHR,AKAP13,AKAP9,AKR1E2,ALDH2,AMIGO3,AMOT,ANKHD1-EIF4EBP3,ANKRD20A4P (includes others),ANKRD23,ANKRD24,ANKRD28,ANKRD36,ANKRD65,ANKS1A,ANO6,APAF1,APBA1,APCDD1,APP,AR,ARFGEF1,ARFGEF2,ARFGEF3,ARHGAP28,ARHGEF28,ARHGEF6,ARID2,AR…	909
Cellular Movement,Hair and Skin Development and Function	Migration of epithelial cell lines	1.08E-07	6.96658	1.23147e-07	6.90958	1.551	AHR,AKAP9,ANKS1A,APBA1,APP,ARHGEF12,CCL5,CDC42BPA,DPP4,FOXO1,GAB2,HDAC6,HGF,ITGA1,ITGA2,ITGB4,LIFR,MAP2K6,MBNL1,PANK4,PIK3C2B,RORA,RPTOR,SHC1,SP1,SPHK1,TGFBR3,TNFRSF11A,TNS3,TSC22D3,VIM,WWTR1	32
Cell-To-Cell Signaling and Interaction	Activation of lymphatic system cells	1.26E-07	6.89963	1.42052e-07	6.84755	1.551	ADRA2A,AHR,ANO6,BCL2L11,CCL5,CCR7,CD74,CHRNA7,CSF2RB,CYSLTR1,DPP4,EBF1,EFNB2,ETS1,FBXO38,FOXD1,FOXO1,FOXP1,HDAC6,HDAC9,HGF,HLA-DPB1,HLA-DRB1,HPS1,HSPA1A,IGF2R,IL18R1,IL24,IL6,IL7,INPP5D,IRAK3,IRF6,ITGAX,ITPKB,JPH4,KMT2C,LAT,LYST,MERTK,MICB,MTOR,NOTCH1,NR5A2,PBX1,PIK3CG,PLCB1,PLCB4,PLXNB1,PPARG,PRDM1,PRKCQ,PTGDR2,PTPN11,REL,SATB1,SKIC2,SMAD4,SPRY1,ST6GAL1,STAT1,STING1,TGFBR2,TLR1,TNC,TNFSF4,TNFSF9…	70
Cell-To-Cell Signaling and Interaction	Activation of lymphoid cells	1.83E-07	6.73755	2.02434e-07	6.69372	1.551	ADRA2A,AHR,ANO6,BCL2L11,CCL5,CCR7,CD74,CHRNA7,CSF2RB,CYSLTR1,DPP4,EBF1,EFNB2,ETS1,FBXO38,FOXD1,FOXO1,FOXP1,HDAC6,HDAC9,HGF,HLA-DPB1,HLA-DRB1,HPS1,HSPA1A,IGF2R,IL18R1,IL24,IL6,IL7,INPP5D,IRAK3,IRF6,ITGAX,ITPKB,JPH4,KMT2C,LAT,LYST,MERTK,MICB,MTOR,NOTCH1,NR5A2,PBX1,PIK3CG,PLCB1,PLCB4,PLXNB1,PPARG,PRDM1,PRKCQ,PTGDR2,REL,SATB1,SKIC2,SMAD4,SPRY1,ST6GAL1,STAT1,STING1,TGFBR2,TLR1,TNC,TNFSF4,TNFSF9,TOMM40…	69
Cancer,Organismal Injury and Abnormalities	Development of adenocarcinoma	7.49E-93	92.1255	9.24691e-92	91.034	1.549	AASS,ABCA3,ABCA6,ABCB7,ABCC1,ABCG2,ABI1,ABR,ACE,ACER2,ACVR2A,ADAMTS10,ADAMTS9,ADAR,ADCK1,ADCY9,ADGRF5,ADORA3,ADRA1D,ADSS1,AFDN,AFF1,AGTPBP1,AHCTF1,AHCYL2,AHNAK2,AHR,AKAP13,AKAP9,ALDH2,AMOT,ANKHD1-EIF4EBP3,ANKRD24,ANKRD28,ANKRD36,ANKS1A,ANO6,APBA1,APCDD1,APOD,APP,AR,ARFGEF1,ARFGEF2,ARFGEF3,ARHGAP19,ARHGAP27,ARHGAP28,ARHGEF12,ARHGEF28,ARHGEF6,ARID2,ARID4A,ARRB1,ARRDC3,ARSL,ASAP1,ATAD2B,ATE1,ATF7,AT…	836
Connective Tissue Development and Function,Tissue Development	Growth of connective tissue	2.55E-09	8.59346	3.60169e-09	8.44349	1.535	ACACA,ADAR,AHR,AR,ARHGEF12,ATR,AXIN2,BCOR,BMPR2,BMX,BRCA2,CASK,CBL,CCDC80,CCN3,CD109,CD74,CDK6,CIB1,CSF2RB,DACH1,DPP4,E2F8,EDNRB,EFNB2,EP300,EP400,ERN1,EZH2,FOXM1,FOXO1,FOXP1,FRS2,FST,GHR,GOLGB1,GPER1,HGF,HSPA1A,IFT172,IGFBP5,IL24,IL6,IL7,INHBB,IRF6,ITGA1,JAK1,KDM2B,KMT2A,KMT2C,LEF1,LIMA1,MAP2K6,MAP3K1,MCF2L,MKI67,MLLT6,MMP16,MRPS18B,MTOR,NCSTN,NF1,NFATC1,NOTCH1,NPR3,NRIP1,PBX1,PFKFB3,PIK3R2,PLXN…	97
Cancer,Hematological Disease,Organismal Injury and Abnormalities	Hematologic cancer of cells	1.18E-42	41.9281	5.10823e-42	41.2917	1.531	AASS,ABCC1,ABCG2,ACE,ADAMTS9,ADAR,ADGRA2,ADGRF5,ADORA3,ADRA1D,AFAP1L1,AFF1,AHCTF1,AHNAK2,AHR,ALDH2,AMIGO3,AMOT,ANKRD20A4P (includes others),ANKRD24,ANKRD36,ANKS1A,APBA1,APCDD1,APP,AR,ARFGEF3,ARHGEF28,ARHGEF6,ARID2,ASAP2,ATF7,ATP10A,ATP11A,ATP13A3,ATP7A,ATR,AXIN2,BACE2,BAZ2A,BAZ2B,BCL2L11,BCL9,BCOR,BIRC6,BMAL2,BRCA2,BRME1,CALCRL,CAMKK2,CAVIN2,CBL,CC2D2A,CCDC144A,CCDC180,CCL5,CCR7,CCSER2,CD34,CD74,…	450
Cell-To-Cell Signaling and Interaction,Cellular Function and Maintenance,Inflammatory Response	Phagocytosis of cells	1.54E-07	6.81248	1.72452e-07	6.76333	1.524	ABI1,ABR,ACE,ADAR,APP,ASAP2,ATAT1,CBL,CD93,CFB,CHN1,CLCN3,CSF2RB,CX3CL1,DOCK8,DYSF,FCMR,FLRT2,FOXP1,GAB2,GATA2,HGF,IL6,INPP5D,IQGAP1,IQSEC1,JAK1,LAT,MBNL1,MERTK,MTMR4,NF1,NRP2,OSBP2,PFKFB3,PLD1,PPARG,PRKAA2,PRKD2,RGS5,RORA,RPTOR,SLC7A8,SPHK1,STAB2,STAT1,STIM1,SUPT20H,TLR1,USP22,VIM,VIP,VWF,WASHC5,ZMYND8	55
Cellular Development,Cellular Growth and Proliferation,Hematological System Development and Function,Hematopoiesis,Lymphoid Tissue Structure and Development,Tissue Development	Development of phagocytes	2.57E-08	7.59007	3.14565e-08	7.50229	1.522	ADK,AKAP13,ANKRD24,APP,BCOR,CAST,CCL23,CD74,CDK6,CSF2RB,EBF1,EIF6,ERN1,FLRT2,FOXO1,FOXP1,GATA2,GMPR2,HGF,HLA-DRB1,IL6,IL7,INPP5D,KDR,KIT,KLF12,KMT2A,LIFR,MTOR,NF1,NFATC1,NOTCH1,PPARG,PRDM1,REL,RPTOR,SH2B3,ST8SIA1,STAT1,TGFBR2,TLR1,TLR6,TNFRSF11A,TNFSF9,TSC1,UBD,VAV3	47
Cancer,Organismal Injury and Abnormalities	Intraabdominal organ tumor	5.02E-118	117.299	2.09167e-116	115.68	1.518	AASS,ABCA3,ABCA6,ABCB7,ABCC1,ABCG2,ABI1,ABR,ACACA,ACBD4,ACBD5,ACE,ACER2,ACKR3,ACVR2A,ADAMTS10,ADAMTS9,ADAR,ADARB1,ADCK1,ADCY9,ADGRA2,ADGRF5,ADK,ADORA3,ADRA1D,ADRA2A,ADSS1,AFAP1L1,AFDN,AFF1,AGTPBP1,AHCTF1,AHCYL2,AHNAK2,AHR,AKAP13,AKAP9,AKR1E2,ALDH2,AMIGO3,AMOT,ANKHD1-EIF4EBP3,ANKRD20A4P (includes others),ANKRD23,ANKRD24,ANKRD28,ANKRD33,ANKRD36,ANKRD65,ANKS1A,ANO6,APAF1,APBA1,APCDD1,APOD,APOLD1,APP…	1165
Hematological Disease,Organismal Injury and Abnormalities	Bone marrow lesion	2.03E-49	48.6925	1.03571e-48	47.9848	1.516	ABCA6,ABCC1,ABCG2,ABI1,ACACA,ACBD5,ACE,ACER2,ADAMTS9,ADARB1,ADGRA2,ADGRF5,ADORA3,ADRA1D,ADSS1,AFDN,AHCYL2,AHNAK2,AKAP13,AKAP9,AMOT,ANKHD1-EIF4EBP3,ANKRD20A4P (includes others),ANKRD24,ANKRD28,ANKRD33,ANKRD36,APAF1,APCDD1,APP,AR,ARFGEF1,ARFGEF3,ARHGAP28,ARHGEF28,ARHGEF6,ARID2,ARID4A,ARRB1,ARSL,ASAP2,ATF6B,ATL1,ATP11A,ATP2B4,ATP6V1A,ATR,AXIN2,BAZ2B,BCAS3,BCL2L11,BCOR,BMAL1,BMPR2,BRCA2,BRME1,BTBD8,C…	428
Cancer,Organismal Injury and Abnormalities	Adenoma	4.33E-17	16.3635	1.10742e-16	15.9557	1.512	ABCG2,ACVR2A,AHNAK2,AHR,ALDH2,APOD,APP,AR,ARFGEF1,ARID4A,ATG2A,ATP1A1,ATR,AXIN2,BACE2,BCL9,BCOR,BMPR2,BOC,C2CD2,CCDC80,CEP290,CHD6,CIT,CLOCK,CLU,CSGALNACT1,CSMD2,DAB2,DAXX,DCC,DCLRE1A,DDX39B,DROSHA,EP300,EZH2,FAT4,FOXM1,FOXO1,FXYD6,GALNT6,GPER1,GSE1,HGF,HLA-F,IER3,INPP5D,ITGA6,ITGB4,JAM3,JPH4,KCNJ5,KCNQ1,KIAA0040,KIF24,KMT2C,KRT7,LAMC1,LAMC3,LEF1,LOC127814297,LSR,MACF1,MAML3,MAP3K1,MDC1,MED12,MGA…	136
Cardiovascular Disease,Organismal Injury and Abnormalities	Aneurysm	1.22E-09	8.91364	1.80741e-09	8.74294	1.51	ABCA3,ABCA6,ADAMTS10,ALDH2,AR,CAST,CCDC80,CCR7,CDK6,CSMD2,CX3CL1,EFNB2,FOXO1,GALNT15,GUCY1A1,HDAC9,HERC1,HGF,HRCT1,HSPG2,IER3,IL6,ITGA2B,JMJD1C,KDR,LAMC1,LPL,MCF2L,MRTFB,MYEOV,NAV2,NF1,NOTCH1,OLFML2A,PIK3C2A,PKP4,PLEKHJ1,PPARG,PRDM2,PREX1,PRKCQ,PRKD2,PRKDC,RORA,SMAD4,TGFBR2,TGFBR3,TGFBRAP1,TMOD1,TMTC2,VCAN,VWF,WWTR1,ZNF827	54
Cancer,Hematological Disease,Immunological Disease,Organismal Injury and Abnormalities	Acute myeloid leukemia	7.92E-48	47.1013	3.77143e-47	46.4235	1.505	ABCA6,ABCC1,ABCG2,ACACA,ACBD5,ACE,ACER2,ADAMTS9,ADARB1,ADGRA2,ADGRF5,ADORA3,ADRA1D,ADSS1,AFDN,AHCYL2,AHNAK2,AKAP13,AKAP9,AMOT,ANKHD1-EIF4EBP3,ANKRD20A4P (includes others),ANKRD24,ANKRD28,ANKRD33,ANKRD36,APCDD1,ARFGEF1,ARFGEF3,ARHGAP28,ARHGEF28,ARHGEF6,ARID2,ARID4A,ARSL,ASAP2,ATF6B,ATL1,ATP11A,ATP2B4,ATP6V1A,ATR,AXIN2,BAZ2B,BCAS3,BCOR,BMAL1,BRCA2,BRME1,BTBD8,C1QL3,CALCRL,CAND2,CARF,CAST,CBL,CC2D2A…	398
Cancer,Organismal Injury and Abnormalities,Renal and Urological Disease	Urinary tract cancer	1.73E-69	68.762	1.33077e-68	67.8759	1.488	ABCA6,ABCC1,ABCG2,ABR,ACBD5,ACE,ACVR2A,ADAMTS9,ADAR,ADARB1,ADCK1,ADGRA2,ADGRF5,ADORA3,ADSS1,AFDN,AGTPBP1,AHNAK2,AHR,AKAP13,AKAP9,AKR1E2,ALDH2,AMOT,ANKRD24,ANKRD33,ANKRD36,ANKS1A,ANO6,APAF1,APBA1,APOD,APP,AR,ARFGEF3,ARHGAP19,ARHGAP27,ARHGEF28,ARID2,ARID4A,ARSL,ASAP1,ATE1,ATF7,ATG2A,ATL1,ATP10A,ATP11A,ATP13A3,ATP1A1,ATP2B4,ATP7A,ATP9A,ATR,AXIN2,BCAS3,BCL2L11,BCL9,BCOR,BFAR,BICRAL,BIRC6,BMAL1,BOC,BR…	673
Cancer,Organismal Injury and Abnormalities	Benign Tumors	9.34E-31	30.0297	3.35971e-30	29.4737	1.487	ABCG2,ACKR3,ACVR2A,ADARB1,AFDN,AFF1,AHNAK2,AHR,ALDH2,APOD,APOLD1,APP,AR,ARFGEF1,ARFGEF2,ARID4A,ARSL,ATG2A,ATP1A1,ATR,AXIN2,BACE2,BCL9,BCOR,BDH1,BMAL2,BMPR2,BOC,BRCA2,C2CD2,CALCRL,CAVIN2,CBL,CCDC80,CD109,CD177,CD34,CELF2,CEP290,CFB,CHD6,CIT,CLEC16A,CLOCK,CLU,COL7A1,CRIM1,CRIP1,CSF2RB,CSGALNACT1,CSMD2,CX3CL1,DAB2,DAXX,DCC,DCLRE1A,DDX39B,DLGAP4,DROSHA,EDNRB,EP300,EPAS1,EPHA4,EZH2,FANCB,FANCM,FAT4,FL…	247
Cancer,Organismal Injury and Abnormalities	Benign solid tumor	2.78E-30	29.556	9.85816e-30	29.0062	1.487	ABCG2,ACKR3,ACVR2A,ADARB1,AFDN,AFF1,AHNAK2,AHR,ALDH2,APOD,APOLD1,APP,AR,ARFGEF1,ARFGEF2,ARID4A,ARSL,ATG2A,ATP1A1,ATR,AXIN2,BACE2,BCL9,BCOR,BDH1,BMAL2,BMPR2,BOC,BRCA2,C2CD2,CALCRL,CAVIN2,CBL,CCDC80,CD109,CD177,CD34,CELF2,CEP290,CFB,CHD6,CIT,CLEC16A,CLOCK,CLU,COL7A1,CRIM1,CRIP1,CSF2RB,CSGALNACT1,CSMD2,CX3CL1,DAB2,DAXX,DCC,DCLRE1A,DDX39B,DLGAP4,DROSHA,EDNRB,EP300,EPAS1,EPHA4,EZH2,FANCB,FANCM,FAT4,FL…	245
Dermatological Diseases and Conditions,Inflammatory Disease,Inflammatory Response,Organismal Injury and Abnormalities	Dermatitis	3.68E-10	9.43415	5.84127e-10	9.23349	1.478	ACACA,ACE,AFF1,AHR,ATP1A1,BMX,CAVIN2,CCL23,CCL5,CCR7,CD74,CHM,CHRNA7,CLEC16A,CRAMP1,CSF2RB,CSGALNACT1,CX3CL1,CYSLTR1,DPP4,EFHC1,EFR3A,ELAPOR2,ETS1,FAM8A1,FLNB,FOXO1,FOXP1,GATAD2B,GGNBP2,GUCY1A1,HDAC6,HDAC9,HERC2,HLA-C,HLA-DPB1,HLA-DRB1,HLA-F,IDE,IFIH1,IL18R1,IL24,IL6,INPP5D,IQGAP1,ITGA6,ITPR3,JAK1,KDR,KIT,LAMP3,LPL,LTBP1,MAST4,MICB,MKI67,MTOR,NAV1,NCR3LG1,NCSTN,NOTCH1,OAS2,OASL,PDE4C,PIK3CG,PLCB1…	100
Cancer,Organismal Injury and Abnormalities	Non rhabdoid tumor	1.12E-86	85.9508	1.31765e-85	84.8802	1.477	AASS,ABCA6,ABCB7,ABCC1,ABCG2,ABI1,ABR,ACACA,ACBD5,ACE,ACER2,ACKR3,ACVR2A,ADAMTS9,ADAR,ADARB1,ADCY9,ADGRA2,ADGRF5,ADK,ADORA3,ADRA1D,ADSS1,AFAP1L1,AFDN,AFF1,AGTPBP1,AHCTF1,AHCYL2,AHNAK2,AHR,AKAP13,AKAP9,ALDH2,AMIGO3,AMOT,ANKHD1-EIF4EBP3,ANKRD20A4P (includes others),ANKRD24,ANKRD28,ANKRD33,ANKRD36,ANKS1A,ANO6,APAF1,APBA1,APCDD1,APOD,APOLD1,APP,AR,ARFGEF1,ARFGEF2,ARFGEF3,ARHGAP27,ARHGAP28,ARHGEF12,AR…	888
Cellular Development,Cellular Growth and Proliferation	Proliferation of progenitor cells	7.14E-08	7.1463	8.36066e-08	7.07776	1.476	ACE,BCOR,BRCA2,CBL,CCL23,CD34,CDK6,CDON,CHD4,CSF2RB,DAB2,EBF1,EPAS1,EZH2,FLI1,FOXO1,FOXP1,FST,GATA2,HGF,IGFBP5,IL6,IL7,ITGA6,ITPKB,JMJD1C,KIT,KMT2A,LEF1,LPIN1,MCF2L,MECOM,MTOR,NF1,NOTCH1,PBX1,PIK3CG,PIK3R2,PLCG1,PRDM1,PTPN11,REL,RPTOR,SAMD9L,SH2B3,SMAD4,SPRY1,STAT1,STIM1,TNFRSF12A,TNFSF4,TSC1,ZBTB16,ZNF609	54
Cancer,Endocrine System Disorders,Gastrointestinal Disease,Organismal Injury and Abnormalities	Pancreatic tumor	1.36E-43	42.8665	5.99119e-43	42.2225	1.475	ABCA3,ABCG2,ABR,ACBD5,ACKR3,ACVR2A,ADAMTS10,ADAR,ADARB1,ADCY9,ADGRA2,ADORA3,ADRA2A,AFF1,AHCTF1,AHNAK2,AHR,AKAP13,AKAP9,AMOT,ANKHD1-EIF4EBP3,ANKRD20A4P (includes others),ANKRD24,APAF1,APP,AR,ARFGEF2,ARHGAP28,ARHGEF12,ARHGEF6,ARID2,ARSL,ATG2A,ATP10A,ATP11A,ATP2B4,ATP7A,ATP7B,ATR,AXIN2,BACE2,BAZ2A,BAZ2B,BCL2L11,BCL9,BEND4,BFAR,BIRC6,BMAL1,BMPR2,BOC,BRCA2,BRME1,C22orf46P,C8orf82,CAMKK2,CARF,CBL,CCDC1…	423
Inflammatory Response,Organismal Injury and Abnormalities	Inflammation of absolute anatomical region	7.32E-18	17.1355	1.95722e-17	16.7084	1.468	ABCA6,ABCC1,ABCG2,ACE,ACKR3,ACVR2A,ADAMTS10,ADAMTS9,ADAR,ADCY9,ADK,ADORA3,ADRA1D,ADRA2A,AHR,AKAP13,ALDH2,ANKRD20A4P (includes others),ANKRD28,ANO6,APAF1,APCDD1,APOD,APP,AR,ARRB1,ASAP1,ASAP2,ATF7,ATP6V1G2,BCAS3,BCL2L11,BMAL1,BMPR2,BMX,BRME1,CALCRL,CARF,CAST,CBL,CCDC80,CCL23,CCL5,CCR7,CD177,CD74,CDK5RAP2,CDK6,CEACAM21,CFAP54,CFB,CHD4,CHD7,CHRNA7,CIT,CLEC16A,CLIC2,CLU,CMKLR1,COL7A1,CPEB3,CPEB4,CRACD…	333
Neurological Disease,Organismal Injury and Abnormalities	Neurological signs	2.75E-11	10.5607	4.87589e-11	10.3119	1.459	ABI1,ACKR3,ADRA1D,ADRA2A,ALDH2,APOD,APP,AR,ARHGEF28,ATP6V1A,CAMKK2,CARF,CCL5,CD74,CDKL5,CELF2,CHN1,CHRNA7,CLEC16A,CLU,CMKLR1,CORO2B,CPEB3,CRIM1,CSGALNACT1,CX3CL1,CYSLTR1,DCAF11,DNALI1,DROSHA,DUSP14,EFR3A,EPHA4,ERC1,FAT4,FLRT2,FOXN3,FOXP1,GABRP,GPER1,GPRIN3,HBP1,HDAC6,HERC1,HIP1,HNRNPH1,HSPA1A,HTR1B,HTR1D,IER3,IFIH1,IL6,ITGB4,ITPKB,JMJD1C,JPH4,KALRN,KCNIP1,KCNN3,KCNQ1,KMT2C,KMT2E,LIFR,LPL,LRBA,LYS…	131
Cancer,Organismal Injury and Abnormalities	Development of benign tumor	1.03E-25	24.9872	3.37705e-25	24.4715	1.454	ABCG2,ACVR2A,AFDN,AHNAK2,AHR,ALDH2,APOD,APP,AR,ARFGEF1,ARID4A,ATG2A,ATP1A1,ATR,AXIN2,BACE2,BCL9,BCOR,BMAL2,BMPR2,BOC,BRCA2,C2CD2,CCDC80,CD177,CD34,CEP290,CHD6,CIT,CLOCK,CLU,CRIP1,CSF2RB,CSGALNACT1,CSMD2,DAB2,DAXX,DCC,DCLRE1A,DDX39B,DROSHA,EP300,EPAS1,EPHA4,EZH2,FANCB,FANCM,FAT4,FLNB,FLRT2,FLT1,FOXM1,FOXO1,FST,FXYD6,GABRP,GALNT6,GNA14,GNMT,GPER1,GSE1,GUCY1A1,HEY2,HGF,HLA-F,HMCN1,HMGCS1,IER3,INPP5D…	191
Cell Death and Survival,Organismal Injury and Abnormalities	Cell death of T lymphocytes	1.19E-08	7.92445	1.52564e-08	7.81655	1.454	ADAR,AHR,APAF1,ARRB1,BCL2L11,BIRC6,CBL,CCL5,CUL9,DOCK8,EP300,EPHA4,ETS1,FCMR,FOXP1,IER3,IFIH1,IL6,IL7,KIFAP3,KLF13,LAT,MAP2K6,MCF2L,MERTK,MT2A,MTOR,NFATC1,NOTCH1,PIK3CG,PIK3R2,PRDM1,PRKCQ,PRKD2,PRKDC,PTPN11,RCAN2,REL,SATB1,SHC1,SPHK1,STAT1,STING1,TGFBR2,TNFSF4,TSC1,TSC22D3,VIP,WWP2,ZBTB16	50
Cell-To-Cell Signaling and Interaction,Hematological System Development and Function,Immune Cell Trafficking,Inflammatory Response	Activation of lymphocytes	3.66E-07	6.43652	3.85263e-07	6.41424	1.446	ADRA2A,AHR,ANO6,BCL2L11,CCL5,CCR7,CD74,CHRNA7,CSF2RB,CYSLTR1,DPP4,EBF1,EFNB2,ETS1,FBXO38,FOXD1,FOXO1,FOXP1,HDAC6,HDAC9,HGF,HLA-DPB1,HLA-DRB1,HPS1,HSPA1A,IGF2R,IL18R1,IL24,IL6,IL7,INPP5D,IRAK3,IRF6,ITPKB,JPH4,KMT2C,LAT,LYST,MERTK,MICB,MTOR,NOTCH1,NR5A2,PBX1,PIK3CG,PLCB1,PLCB4,PLXNB1,PPARG,PRDM1,PRKCQ,PTGDR2,REL,SATB1,SKIC2,SMAD4,SPRY1,ST6GAL1,STAT1,STING1,TGFBR2,TLR1,TNC,TNFSF4,TNFSF9,TOMM40,TRAF1…	68
Cell Death and Survival,Organismal Injury and Abnormalities	Apoptosis of mononuclear leukocytes	1.51E-07	6.82102	1.69473e-07	6.7709	1.445	ADAR,ADORA3,AHR,APP,ARRB1,BCL2L11,BIRC6,CCL5,CUL9,DOCK8,EP300,EPHA4,ETS1,FCMR,FOXP1,IER3,IFIH1,IL6,IL7,INPP5D,ITPR3,KIFAP3,KLF13,MAP2K6,MCF2L,MERTK,MT2A,MTOR,NFATC1,NOTCH1,PARP14,PIK3CG,PLCG1,PRKCQ,PRKDC,RCAN2,REL,SATB1,SFN,SHC1,SLC39A10,SPHK1,STAT1,STING1,TNFSF4,TSC1,TSC22D3,UBD,VAV3,VIP,WWP2,ZBTB16	52
Cell-To-Cell Signaling and Interaction,Hematological System Development and Function	Activation of blood cells	8.10E-13	12.0915	1.57282e-12	11.8033	1.441	ACE,ADGRF5,ADRA2A,AHR,ANO6,APP,ATP1A1,BCL2L11,CBL,CCL23,CCL5,CCR7,CD74,CD93,CHRNA7,CLEC11A,CLU,CSF2RB,CX3CL1,CYSLTR1,DGKA,DOCK8,DPP4,DYSF,EBF1,EFNB2,ETS1,FAM76B,FBXO38,FOXD1,FOXO1,FOXP1,GPER1,HBP1,HDAC6,HDAC9,HGF,HLA-DPB1,HLA-DRB1,HPS1,HSPA1A,HSPG2,IFIH1,IGF2R,IL18R1,IL24,IL6,IL7,INPP5D,IRAK3,IRF6,ITGA1,ITGA2B,ITPKB,JPH4,KIT,KMT2C,KMT2E,LAT,LTBP1,LYST,MERTK,MICB,MRTFB,MT-CO1,MT-ND6,MTOR,NBEAL2,NL…	119
Cardiovascular Disease,Organismal Injury and Abnormalities	Hypertension	2.81E-19	18.5513	7.93785e-19	18.1003	1.423	ABCG2,ACE,ADCY9,ADGRF5,ADK,ADRA1D,ADRA2A,AHR,ALDH2,APOLD1,AR,ARHGEF12,ATP13A3,ATP1A1,ATP2B4,ATP6V1A,AXIN2,BCAS3,BMPR2,BRME1,CBLN1,CCDC80,CCDC88C,CCL5,CD34,CDK6,CEP170,CHM,CHRNA7,CMKLR1,COQ10A,CPEB4,CTDSPL,CX3CL1,DCC,DCHS1,DENND11,DENND5A,DOCK6,DYNC2H1,EBF1,EDNRB,EML6,EPAS1,F8,FAM171B,FANCB,FLNB,FLT1,FOXO1,FOXP1,FST,FZD4,GALNT18,GFOD1,GSE1,GTF2I,GUCY1A1,HDAC9,HMGCS1,HRCT1,IER3,IGFBP5,IL6,INTS3,IRA…	177
Cellular Movement	Cell movement of tumor cells	1.88E-07	6.72584	2.06821e-07	6.68441	1.414	CBL,CCL5,CCN3,CCR7,CD74,CSDE1,DPP4,EZH2,FLT1,FOXM1,GAB2,HGF,IL6,IL7,IQGAP1,KDR,MAP3K1,NEDD9,NOTCH1,PEAK1,PTPN11,RHOBTB2,S100A2,SFRP1,SOX7,SPHK1,ST6GAL1,STAT1,TNC,VCAN,VIM,ZBTB16	32
Cellular Development,Cellular Growth and Proliferation	Proliferation of stem cells	5.59E-08	7.25259	6.59198e-08	7.18098	1.41	ABCG2,ACE,AFAP1L1,APP,AXIN2,BRCA2,CBL,CD109,CD34,CDK6,DAB2,EPAS1,EZH2,FOXM1,FOXP1,GAB2,GATA2,HGF,IL6,IL7,IRF6,IRX5,ITGA1,JMJD1C,KDR,KIT,KMT2A,MAP3K1,MECOM,MKI67,MTOR,NCOA3,NF1,NFATC1,NFIB,NOTCH1,PBX1,PPARG,PTPN11,RPTOR,SFN,SFRP1,SH2B3,SMAD4,TGFBR2,TNC	46
Cancer,Organismal Injury and Abnormalities,Renal and Urological Disease	Urinary tract carcinoma	1.11E-70	69.9547	8.67188e-70	69.0619	1.406	ABCA6,ABCC1,ABCG2,ABR,ACBD5,ACE,ACVR2A,ADAMTS9,ADAR,ADARB1,ADCK1,ADGRA2,ADGRF5,ADORA3,ADSS1,AFDN,AGTPBP1,AHNAK2,AHR,AKAP13,AKAP9,AKR1E2,ALDH2,AMOT,ANKRD24,ANKRD33,ANKRD36,ANKS1A,ANO6,APAF1,APOD,APP,AR,ARFGEF3,ARHGAP19,ARHGAP27,ARHGEF28,ARID2,ARID4A,ARSL,ASAP1,ATE1,ATF7,ATG2A,ATL1,ATP10A,ATP11A,ATP13A3,ATP1A1,ATP2B4,ATP7A,ATP9A,ATR,AXIN2,BCAS3,BCL2L11,BCL9,BCOR,BFAR,BICRAL,BIRC6,BMAL1,BOC,BRCA2,BR…	661
Cancer,Hematological Disease,Organismal Injury and Abnormalities	Bone marrow cancer	2.23E-48	47.6517	1.0878e-47	46.9634	1.4	ABCA6,ABCC1,ABCG2,ACACA,ACBD5,ACE,ACER2,ADAMTS9,ADARB1,ADGRA2,ADGRF5,ADORA3,ADRA1D,ADSS1,AFDN,AHCYL2,AHNAK2,AKAP13,AKAP9,AMOT,ANKHD1-EIF4EBP3,ANKRD20A4P (includes others),ANKRD24,ANKRD28,ANKRD33,ANKRD36,APAF1,APCDD1,AR,ARFGEF1,ARFGEF3,ARHGAP28,ARHGEF28,ARHGEF6,ARID2,ARID4A,ARSL,ASAP2,ATF6B,ATL1,ATP11A,ATP2B4,ATP6V1A,ATR,AXIN2,BAZ2B,BCAS3,BCOR,BMAL1,BRCA2,BRME1,BTBD8,C1QL3,CALCRL,CAND2,CARF,CAST,C…	416
Cancer,Hematological Disease,Immunological Disease,Organismal Injury and Abnormalities	Myeloid leukemia	2.27E-48	47.644	1.10194e-47	46.9578	1.396	ABCA6,ABCC1,ABCG2,ACACA,ACBD5,ACE,ACER2,ADAMTS9,ADARB1,ADGRA2,ADGRF5,ADORA3,ADRA1D,ADSS1,AFDN,AHCYL2,AHNAK2,AKAP13,AKAP9,AMOT,ANKHD1-EIF4EBP3,ANKRD20A4P (includes others),ANKRD24,ANKRD28,ANKRD33,ANKRD36,APAF1,APCDD1,ARFGEF1,ARFGEF3,ARHGAP28,ARHGEF28,ARHGEF6,ARID2,ARID4A,ARSL,ASAP2,ATF6B,ATL1,ATP11A,ATP2B4,ATP6V1A,ATR,AXIN2,BAZ2B,BCAS3,BCOR,BMAL1,BRCA2,BRME1,BTBD8,C1QL3,CALCRL,CAND2,CARF,CAST,CBL,…	404
Cardiovascular Disease,Neurological Disease,Organismal Injury and Abnormalities	Cerebrovascular dysfunction	6.35E-16	15.1972	1.52644e-15	14.8163	1.396	ABCC1,ABCG2,ABHD17AP4,ACE,ADCY9,ADORA3,ADRA1D,ADRA2A,ALDH2,APP,AR,ATP1A1,CALCRL,CARF,CCDC80,CCL5,CDK6,CELF1,CHRNA7,CLU,CMKLR1,CRYBG1,CSGALNACT1,CX3CL1,DOCK6,DOCK9,EFR3A,ELAPOR2,ENDOV,EPS15,F8,FBXO25,FGF11,FILIP1,FLT1,FMNL2,FOLH1,FOXN3,GABRP,GALNT18,GUCY1A1,HDAC9,HGF,IL6,IRAK3,ITGA2B,ITSN2,JAM3,JMJD1C,KAT2B,KCNJ5,KCNQ1,KDR,KIT,KLF12,KSR2,LAMC1,LCP1,LPL,LSR,MAST4,MCC,MCF2L,MIDEAS,MRTFB,MT-CO1,MT-CO…	122
Endocrine System Disorders,Metabolic Disease,Organismal Injury and Abnormalities	Insulin resistance	2.53E-11	10.5969	4.50178e-11	10.3466	1.395	ACACA,ACE,ADARB1,ADCY9,ADK,ADRA1D,ADRA2A,AFF1,AHR,ALDH2,ANKS1A,AR,ARFGEF3,ARID4A,ATP1A1,BACE2,BMAL1,C1QL3,CALCRL,CAST,CCL5,CCR7,CD93,CELF1,CHD4,CLU,CPEB3,CRIM1,CSGALNACT1,DCAF11,DCAF7,DCC,DMXL2,DOCK6,DPP4,DYNC2H1,EP400,EPB41L4B,FOCAD,FOXO1,GAB2,GATA2,GHR,GOLGB1,GPER1,GSE1,GTF2I,GUCY1A1,HERC1,HIVEP1,HSPG2,HTR1D,IFT172,IL6,IQGAP1,IRAK3,ITPR3,JARID2,JMJD1C,KCNQ1,KDR,KLF11,KMT2A,KMT2E,LONRF2,LPIN1,LP…	131
Immunological Disease,Neurological Disease,Organismal Injury and Abnormalities	Autoimmune neurological disorder	1.39E-10	9.85699	2.31281e-10	9.63586	1.395	ABCG2,ACVR2A,ADRA1D,ADRA2A,AFF1,AHR,APP,ARRB1,ASAP1,ATF6B,CCL5,CCR7,CD109,CD74,CFB,CLEC16A,CPEB3,CRACD,CSF2RB,CYSLTR1,DOCK8,DPP4,DUSP14,EHMT2,EPHA4,ETS1,EZH2,FOXP1,GABRP,GATAD2B,GPC5,GTF2H4,HLA-DRB1,HMGCS1,IFIH1,IGF2R,IL18R1,IL6,IL7,IQGAP1,IRAK3,ITGAX,ITGB4,ITPR3,JAK1,KALRN,KCND1,KCNIP1,KCNJ12,KCNQ1,KIT,LAMA4,LAT,LEF1,LRBA,LSR,LYST,MAML1,MERTK,MICB,MIDEAS,MMEL1,MPHOSPH9,MT-CO1,MT-CO2,MT2A,MTHFD2,…	111
Cancer,Hematological Disease,Immunological Disease,Organismal Injury and Abnormalities	Neoplasia of leukocytes	2.09E-46	45.6799	9.63134e-46	45.0163	1.392	AASS,ABCC1,ABCG2,ACE,ADAMTS9,ADAR,ADGRA2,ADGRF5,ADORA3,ADRA1D,AFAP1L1,AFF1,AGTPBP1,AHCTF1,AHCYL2,AHNAK2,AHR,ALDH2,AMIGO3,AMOT,ANKRD20A4P (includes others),ANKRD24,ANKRD36,ANKS1A,APBA1,APCDD1,APP,AR,ARFGEF3,ARHGEF28,ARHGEF6,ARID2,ARID4A,ASAP2,ATF7,ATP10A,ATP11A,ATP13A3,ATP7A,ATR,AXIN2,BACE2,BAZ2A,BAZ2B,BCL2L11,BCL9,BCOR,BIRC6,BMAL2,BRCA2,BRME1,CALCRL,CAMKK2,CAVIN2,CBL,CC2D2A,CCDC144A,CCDC180,CCL5,…	488
Cancer,Organismal Injury and Abnormalities,Tumor Morphology	Invasion of malignant tumor	2.95E-09	8.53018	4.12587e-09	8.38448	1.39	ACKR3,AR,CCN3,CLU,DPP4,ETS1,FOXM1,GAB2,HGF,IGFBP5,IL24,IL6,ITGA1,ITGA2,ITGA6,ITGB4,MTOR,NCOA3,NEDD9,NFATC1,NOTCH1,PLD1,SFRP1,SHC1,SPHK1,TGFBR2,VAV3,VCAN,VIM,ZBTB16	30
Cellular Movement,Hematological System Development and Function,Immune Cell Trafficking	Cell movement of lymphocytes	3.03E-07	6.51856	3.22684e-07	6.49122	1.387	ABCC1,ACKR3,ADAR,APOD,APP,AR,BCL9,BMPR2,CCL23,CCL5,CCR7,CD74,CMKLR1,CSF2RB,CX3CL1,CYSLTR1,DOCK8,DPP4,ETS1,FOXO1,FOXP1,GATA2,HDAC6,HGF,IL6,IL7,INPP5D,IRF6,ITGA1,ITGA2,ITGA6,JAK1,JAM3,KDR,KMT2C,LAMA4,LAT,LCP1,MAML1,MERTK,MTOR,NEDD9,NFATC1,NOTCH1,PIK3CG,PIK3R2,PLCG1,PPARG,PRKCQ,PRKN,PTGDR2,PTPRB,RGS5,RORA,RPTOR,SATB1,SETD2,SHC1,SMAD4,STAT1,STING1,TGFBR2,TNFSF4,TNFSF9,TRPV1,VAV3,VIP	67
Cell Cycle	Interphase	1.41E-09	8.85078	2.06745e-09	8.68457	1.386	ADRA1D,AHR,APP,AR,ARRB1,ATR,CAMKK2,CBL,CDK6,CELF2,CEP120,CHRNA7,CIT,CNOT6L,DAB2,DAXX,DCC,DDIAS,DPP4,E2F8,EHMT2,EP300,EP400,ETS1,EZH2,FBXL7,FLT1,FOXM1,FOXN3,FOXO1,GEN1,GHR,GTF2I,HDAC9,HGF,IER3,IGFBP5,IL24,IL6,IL7,ITGA2,ITGA6,JAM3,JARID2,KDR,KIF20B,KIT,KLF12,KMT2A,KMT2E,LEF1,LPIN1,MAP2K6,MARCHF8,MDC1,MED16,MTOR,NCOA3,NEDD9,NEK9,NFATC1,NOTCH1,NRIP1,NUAK1,PARG,PARP14,PBX1,PFKFB3,PHF8,PLCB1,PLCG1,POLA…	113
Molecular Transport	Transport of metal	1.86E-08	7.73049	2.31631e-08	7.6352	1.38	ABCB7,ABCC1,ADRA2A,AHR,ANO6,APP,ATP1A1,ATP2B4,ATP6V1A,ATP7A,ATP7B,CALCRL,CCL5,CHRNA7,CLU,CYSLTR1,EDNRB,EPM2A,ETS1,FOXO1,FRRS1,HBP1,HCN3,HEPH,HERC2,HPS1,IL6,ITPR3,JPH2,JPH4,KCNIP1,KCNJ12,KCNJ5,KCNMB4,KCNN1,KCNN3,KCNQ1,LRRC55,MLLT6,MT2A,NEDD4L,NEDD9,NFATC1,NR3C2,NSF,PIK3C2A,PIK3CG,PLCB4,PLCG1,PPARG,SCN3B,SCN4A,SCNN1B,SCNN1G,SLC12A5,SLC12A7,SLC22A17,SLC24A4,SLC30A3,SLC39A10,SLCO2B1,SMAD1,SMAD4,STC1,…	71
Cancer,Organismal Injury and Abnormalities	Frequency of tumor	2.99E-122	121.524	1.86875e-120	119.728	1.377	AASS,ABCA3,ABCA6,ABCB7,ABCC1,ABCG2,ABI1,ABR,ACBD4,ACBD5,ACE,ACER2,ACKR3,ACVR2A,ADAMTS10,ADAMTS9,ADAR,ADARB1,ADCK1,ADCY9,ADGRA2,ADGRF5,ADK,ADORA3,ADRA1D,ADSS1,AFAP1L1,AFDN,AFF1,AGTPBP1,AHCTF1,AHCYL2,AHNAK2,AHR,AKAP13,AKAP9,ALDH2,AMIGO3,AMOT,ANKHD1-EIF4EBP3,ANKRD20A4P (includes others),ANKRD23,ANKRD24,ANKRD28,ANKRD36,ANKRD65,ANKS1A,ANO6,APAF1,APBA1,APCDD1,APOD,APP,AR,ARFGEF1,ARFGEF2,ARFGEF3,ARHGAP1…	1057
Embryonic Development,Organismal Development	Development of abdomen	1.79E-10	9.74715	2.92007e-10	9.53461	1.377	ACE,ACVR2A,ADAR,AHR,AKAP9,AR,ASL,ATF7,BCL2L11,BMAL1,BRCA2,CCR7,CEP120,CLU,CX3CL1,DCHS1,EDNRB,EHMT2,EP300,EPAS1,ERMP1,ERN1,ETV1,EZH2,FAT4,FLT1,FOXD1,FOXM1,FRAS1,FST,GHR,HDAC6,HGF,IGF2R,IL6,IL7,INHBB,ITGA1,ITGA2,ITGA8,JARID2,KCNQ1,KDR,KIT,KLHL3,KMT2A,LAMC1,LSR,MECOM,MERTK,MRTFB,MTOR,MTSS1,NF1,NFIA,NID1,NIPBL,NOTCH1,NR2C2,NR3C2,NR5A2,PBX1,POMC,PPARG,PRDM1,PRKDC,PRPF8,PTPN11,RDX,RFX3,SAMD9L,SFRP1,SH2…	92
Immunological Disease,Inflammatory Disease,Organismal Injury and Abnormalities	Immune mediated inflammatory disease	3.24E-19	18.4895	9.10112e-19	18.0409	1.374	ABCC1,ACE,ADAR,ADARB1,ADRA1D,ADRA2A,AFF1,AHNAK2,AHR,ALDH2,ANKS1A,AR,ARID4A,ARRB1,ASAP1,B3GNT5,BACE2,BCL2L11,BMAL1,BRME1,CALCRL,CBL,CCL23,CCL5,CCN3,CCR7,CD34,CD74,CDK5RAP2,CDK6,CFB,CHD4,CHM,CHN1,CIB1,CLEC16A,CLIC2,CLU,CMKLR1,CRIP1,CSF2RB,CSGALNACT1,CX3CL1,CYSLTR1,DAB2,DAXX,DCC,DGKA,DPP4,EDA,EDNRB,EFHC1,EFR3A,EHMT2,EML4,EP300,EPAS1,EPHA4,ERMP1,ETS1,EZH2,FBXL7,FCHSD2,FIP1L1,FLI1,FLNB,FLT1,FOXO1,FOXP…	260
Lymphoid Tissue Structure and Development,Tissue Morphology	Quantity of bone marrow cells	5.39E-07	6.26841	5.5e-07	6.25964	1.374	AHR,BMAL1,BRCA2,CDK6,CIB1,CLEC11A,CSF2RB,DAXX,EBF1,FLI1,GAB2,GATA2,IL6,IL7,INPP5D,ITPKB,JAM2,JAM3,KMT2A,KMT2E,MECOM,NBEAL2,PBX1,PTPN11,RASSF2,REL,RPTOR,SH2B3,TNFRSF11A,USP22,VIM	31
Inflammatory Response,Organismal Injury and Abnormalities	Inflammation of organ	3.42E-15	14.466	7.91667e-15	14.1015	1.366	ABCG2,ACACA,ACE,ACKR3,ACVR2A,ADAR,ADK,ADORA3,ADRA1D,ADRA2A,ADSS1,AFF1,AHR,ALDH2,APCDD1,APOD,APP,AR,ARRB1,ASAP1,ATF7,ATP1A1,BCL2L11,BMX,BRME1,CALCRL,CAST,CAVIN2,CBL,CCDC80,CCL23,CCL5,CCR7,CD177,CD74,CEACAM21,CFB,CHD4,CHD7,CHM,CHRNA7,CIT,CLEC16A,CLU,CMKLR1,COL7A1,CPEB3,CRACD,CRAMP1,CSF2RB,CSGALNACT1,CX3CL1,CYP1A1,CYSLTR1,DCC,DERL3,DNAJC16,DOCK8,DPP4,DUSP14,EBF1,EDNRB,EFHC1,EFR3A,EHMT2,ELAPOR2,EP300…	271
Cell Death and Survival,Organismal Injury and Abnormalities	Cell death of immune cells	2.88E-12	11.5406	5.45455e-12	11.2632	1.363	ABCC1,ADAR,ADORA3,AHR,APAF1,APP,ARRB1,BCL2L11,BIRC6,CAST,CBL,CCL5,CCR7,CD74,CHD4,CLEC11A,CLOCK,CLU,CSF2RB,CUL9,CX3CL1,DAXX,DOCK8,DRAM2,EBF1,EP300,EPAS1,EPHA4,ERN1,ETS1,FCMR,FOXO1,FOXP1,GAB2,GHR,HDAC9,HGF,IER3,IFIH1,IL24,IL6,IL7,INPP5D,IRAK3,ITPKB,ITPR3,JAK1,KIFAP3,KIT,KLF13,LAT,LEF1,MAP2K6,MCF2L,MERTK,MT2A,MTOR,NF1,NFATC1,NOTCH1,PARP14,PELI2,PFKFB3,PIK3CG,PIK3R2,PLCG1,PLXNB1,PPARG,PRDM1,PRKCQ,PRK…	100
Cell Morphology,Cellular Movement	Cell spreading	2.23E-10	9.6517	3.60258e-10	9.44339	1.356	ABI1,AHR,ASAP1,CAST,CBL,CCL5,CIB1,DAB2,EDNRB,ETS1,FLNB,HGF,HSPG2,IGF2R,IGFBP5,INPP5D,ITGA1,ITGA2,ITGA2B,ITGA6,ITGB4,LAT,MTOR,NCDN,NEDD9,NSF,PAK3,PEAK1,PIK3C2B,PIK3CG,PLCG1,PREX1,PRKAA2,PRKCQ,PRKD2,PTPN11,RAB11FIP3,SDC2,SLC12A5,SLK,SMAD4,SPHK1,ST6GAL1,STIM1,TNC,TNS3,VAV3,VIM,VWF	49
Cancer,Gastrointestinal Disease,Organismal Injury and Abnormalities	Digestive organ tumor	7.28E-114	113.138	1.86667e-112	111.729	1.351	AASS,ABCA3,ABCA6,ABCB7,ABCC1,ABCG2,ABI1,ABR,ACACA,ACBD4,ACBD5,ACE,ACKR3,ACVR2A,ADAMTS10,ADAMTS9,ADAR,ADARB1,ADCK1,ADCY9,ADGRA2,ADGRF5,ADK,ADORA3,ADRA1D,ADRA2A,ADSS1,AFAP1L1,AFDN,AFF1,AGTPBP1,AHCTF1,AHCYL2,AHNAK2,AHR,AKAP13,AKAP9,ALDH2,AMIGO3,AMOT,ANKHD1-EIF4EBP3,ANKRD20A4P (includes others),ANKRD23,ANKRD24,ANKRD28,ANKRD36,ANKRD65,ANKS1A,ANO6,APAF1,APBA1,APCDD1,APOD,APOLD1,APP,AR,ARFGEF1,ARFGEF2,A…	1137
Cancer,Organismal Injury and Abnormalities,Respiratory Disease	Nonsquamous non-small cell lung carcinoma	1.16E-34	33.9355	4.53125e-34	33.3438	1.348	ABCB7,ACVR2A,ADAR,ADRA1D,ADSS1,AFDN,AGTPBP1,AHCTF1,AHNAK2,AHR,AKAP13,AKAP9,ANKRD24,ANKRD28,ANKRD33,APBA1,APOD,AR,ARFGEF1,ARFGEF2,ARHGAP28,ARHGEF12,ARHGEF6,ARID2,ARRB1,ATE1,ATG2A,ATP10A,ATP7B,ATR,AXIN2,BACE2,BAZ2A,BCAS3,BCOR,BDH1,BEND4,BICRAL,BIRC6,BMAL2,BMX,BRCA2,CAMKK2,CAND2,CBL,CBLN1,CCDC150,CCDC180,CCDC80,CCNB1IP1,CD34,CECR2,CEP120,CEP170,CEP192,CEP290,CEP295,CFAP206,CFAP96,CHD6,CIT,CLEC16A,CN…	364
Cancer,Organismal Injury and Abnormalities,Respiratory Disease	Lung adenocarcinoma	3.36E-34	33.4737	1.30233e-33	32.8853	1.348	ABCB7,ACVR2A,ADAR,ADRA1D,AFDN,AGTPBP1,AHCTF1,AHNAK2,AHR,AKAP13,AKAP9,ANKRD24,ANKRD28,APBA1,APOD,AR,ARFGEF1,ARFGEF2,ARHGAP28,ARHGEF12,ARHGEF6,ARID2,ARRB1,ATE1,ATG2A,ATP10A,ATP7B,ATR,AXIN2,BACE2,BAZ2A,BCAS3,BCOR,BDH1,BEND4,BICRAL,BIRC6,BMAL2,BMX,BRCA2,CAMKK2,CAND2,CBL,CBLN1,CCDC150,CCDC180,CCDC80,CCNB1IP1,CD34,CECR2,CEP120,CEP170,CEP192,CEP290,CEP295,CFAP206,CFAP96,CHD6,CIT,CLEC16A,CNOT3,CNTNAP1,CO…	361
Cancer,Organismal Injury and Abnormalities	Transformation of B lymphocytes	2.44E-08	7.61261	2.9902e-08	7.5243	1.342	ANO6,ASAP1,CBL,CCN3,EBF1,EFR3A,EP300,FOXP1,GHR,IL7,INPP5D,JAK1,NF1,OSBPL1A,PIK3R2,SNX29,TNFSF9	17
Connective Tissue Disorders,Organismal Injury and Abnormalities,Skeletal and Muscular Disorders	Non-traumatic arthropathy	2.17E-17	16.6635	5.68063e-17	16.2456	1.334	ABCA6,ABCC1,ABCG2,ACKR3,ADAMTS10,ADAMTS9,ADCY9,ADORA3,ADRA1D,ADRA2A,AHR,AKAP13,ALDH2,ANKRD20A4P (includes others),ANKRD28,ANO6,APCDD1,APOD,AR,ARRB1,ASAP1,ASAP2,ATP6V1G2,BCAS3,BMAL1,BMPR2,BRME1,CALCRL,CARF,CCL23,CCL5,CCR7,CD74,CDK5RAP2,CDK6,CFAP54,CFB,CLIC2,CLU,CMKLR1,CPEB4,CSF2RB,CSGALNACT1,CX3CL1,DAB2,DACH1,DAXX,DNAJC16,DPP4,DYNC2H1,EPAS1,ERN1,ETS1,EZH2,FBXL7,FILIP1,FIP1L1,FLT1,FOXO1,FOXP1,FST,G…	191
Cell Death and Survival,Organismal Injury and Abnormalities	Cell death of mononuclear leukocytes	3.82E-09	8.41794	5.21858e-09	8.28245	1.328	ADAR,ADORA3,AHR,APAF1,APP,ARRB1,BCL2L11,BIRC6,CBL,CCL5,CUL9,DOCK8,EP300,EPHA4,ETS1,FCMR,FOXP1,IER3,IFIH1,IL6,IL7,INPP5D,ITPR3,KIFAP3,KLF13,LAT,MAP2K6,MCF2L,MERTK,MT2A,MTOR,NFATC1,NOTCH1,PARP14,PIK3CG,PIK3R2,PLCG1,PRDM1,PRKCQ,PRKD2,PRKDC,PTPN11,RCAN2,REL,SATB1,SFN,SH3BP5,SHC1,SLC39A10,SPHK1,STAT1,STING1,TGFBR2,TNFSF4,TSC1,TSC22D3,UBD,VAV3,VIP,WWP2,ZBTB16	61
Organismal Injury and Abnormalities	Abdominal lesion	1.19E-115	114.924	3.60606e-114	113.443	1.326	AASS,ABCA3,ABCA6,ABCB7,ABCC1,ABCG2,ABI1,ABR,ACACA,ACBD4,ACBD5,ACE,ACER2,ACKR3,ACVR2A,ADAMTS10,ADAMTS9,ADAR,ADARB1,ADCK1,ADCY9,ADGRA2,ADGRF5,ADK,ADORA3,ADRA1D,ADRA2A,ADSS1,AFAP1L1,AFDN,AFF1,AGTPBP1,AHCTF1,AHCYL2,AHNAK2,AHR,AKAP13,AKAP9,AKR1E2,ALDH2,AMIGO3,AMOT,ANKHD1-EIF4EBP3,ANKRD20A4P (includes others),ANKRD23,ANKRD24,ANKRD28,ANKRD33,ANKRD36,ANKRD65,ANKS1A,ANO6,APAF1,APBA1,APCDD1,APOD,APOLD1,APP…	1175
Cancer,Organismal Injury and Abnormalities,Respiratory Disease	Development of respiratory system tumor	4.16E-34	33.3809	1.6e-33	32.7959	1.323	ABCB7,ACVR2A,ADAR,ADRA1D,AFDN,AGTPBP1,AHCTF1,AHNAK2,AHR,AKAP13,AKAP9,ANKRD24,ANKRD28,APBA1,APOD,AR,ARFGEF1,ARFGEF2,ARHGAP28,ARHGEF12,ARHGEF6,ARID2,ARRB1,ATE1,ATG2A,ATP10A,ATP7B,ATR,AXIN2,BACE2,BAZ2A,BCAS3,BCOR,BDH1,BEND4,BICRAL,BIRC6,BMAL2,BMX,BRCA2,CAMKK2,CAND2,CBL,CBLN1,CCDC150,CCDC180,CCDC80,CCNB1IP1,CD34,CDK6,CECR2,CEP120,CEP170,CEP192,CEP290,CEP295,CFAP206,CFAP96,CHD6,CIT,CLEC16A,CNOT3,CNTNA…	363
Cancer,Organismal Injury and Abnormalities	Liquid tumor	1.44E-54	53.8416	7.65957e-54	53.1158	1.315	ABCA6,ABCC1,ABCG2,ABI1,ACACA,ACBD5,ACE,ACER2,ADAMTS9,ADARB1,ADGRA2,ADGRF5,ADORA3,ADRA1D,ADSS1,AFDN,AFF1,AHCTF1,AHCYL2,AHNAK2,AKAP13,AKAP9,ALDH2,AMOT,ANKHD1-EIF4EBP3,ANKRD20A4P (includes others),ANKRD24,ANKRD28,ANKRD33,ANKRD36,ANKS1A,APAF1,APCDD1,APP,AR,ARFGEF1,ARFGEF3,ARHGAP28,ARHGEF28,ARHGEF6,ARID2,ARID4A,ARRB1,ARSL,ASAP2,ATF6B,ATL1,ATP10A,ATP11A,ATP13A3,ATP2B4,ATP6V1A,ATR,AXIN2,BAZ2A,BAZ2B,BCAS…	538
Cancer,Organismal Injury and Abnormalities	Tumorigenesis of epithelial neoplasm	8.66E-117	116.062	2.88667e-115	114.54	1.301	AASS,ABCA3,ABCA6,ABCB7,ABCC1,ABCG2,ABI1,ABR,ACBD4,ACBD5,ACE,ACER2,ACKR3,ACVR2A,ADAMTS10,ADAMTS9,ADAR,ADARB1,ADCK1,ADCY9,ADGRA2,ADGRF5,ADK,ADORA3,ADRA1D,ADSS1,AFAP1L1,AFDN,AFF1,AGTPBP1,AHCTF1,AHCYL2,AHNAK2,AHR,AKAP13,AKAP9,ALDH2,AMIGO3,AMOT,ANKHD1-EIF4EBP3,ANKRD20A4P (includes others),ANKRD23,ANKRD24,ANKRD28,ANKRD36,ANKRD65,ANKS1A,ANO6,APAF1,APBA1,APCDD1,APOD,APP,AR,ARFGEF1,ARFGEF2,ARFGEF3,ARHGAP1…	1040
Cancer,Organismal Injury and Abnormalities	Formation of epithelial neoplasm	1.03E-116	115.987	3.32258e-115	114.479	1.301	AASS,ABCA3,ABCA6,ABCB7,ABCC1,ABCG2,ABI1,ABR,ACBD4,ACBD5,ACE,ACER2,ACKR3,ACVR2A,ADAMTS10,ADAMTS9,ADAR,ADARB1,ADCK1,ADCY9,ADGRA2,ADGRF5,ADK,ADORA3,ADRA1D,ADSS1,AFAP1L1,AFDN,AFF1,AGTPBP1,AHCTF1,AHCYL2,AHNAK2,AHR,AKAP13,AKAP9,ALDH2,AMIGO3,AMOT,ANKHD1-EIF4EBP3,ANKRD20A4P (includes others),ANKRD23,ANKRD24,ANKRD28,ANKRD36,ANKRD65,ANKS1A,ANO6,APAF1,APBA1,APCDD1,APOD,APP,AR,ARFGEF1,ARFGEF2,ARFGEF3,ARHGAP1…	1040
Cancer,Organismal Injury and Abnormalities	Lymphatic system tumor	9.20E-50	49.0362	4.74227e-49	48.324	1.288	AASS,ABCC1,ABCG2,ACE,ADAMTS9,ADAR,ADGRA2,ADGRF5,ADORA3,ADRA1D,AFAP1L1,AFDN,AFF1,AGTPBP1,AHCTF1,AHCYL2,AHNAK2,AHR,ALDH2,AMIGO3,AMOT,ANKRD20A4P (includes others),ANKRD24,ANKRD36,ANKS1A,APBA1,APCDD1,APP,AR,ARFGEF3,ARHGAP27,ARHGEF28,ARHGEF6,ARID2,ARID4A,ARSL,ASAP2,ATF7,ATP10A,ATP11A,ATP13A3,ATP7A,ATR,AXIN2,BACE2,BAZ2A,BAZ2B,BCL2L11,BCL9,BCOR,BIRC6,BMAL2,BRCA2,BRME1,CALCRL,CAMKK2,CAND2,CAVIN2,CBL,CC2D…	518
Cancer,Organismal Injury and Abnormalities	Lymphohematopoietic neoplasia	1.89E-66	65.7235	1.32168e-65	64.8789	1.282	AASS,ABCA6,ABCC1,ABCG2,ABI1,ACACA,ACBD5,ACE,ACER2,ADAMTS9,ADAR,ADARB1,ADGRA2,ADGRF5,ADK,ADORA3,ADRA1D,ADSS1,AFAP1L1,AFDN,AFF1,AGTPBP1,AHCTF1,AHCYL2,AHNAK2,AHR,AKAP13,AKAP9,ALDH2,AMIGO3,AMOT,ANKHD1-EIF4EBP3,ANKRD20A4P (includes others),ANKRD24,ANKRD28,ANKRD33,ANKRD36,ANKS1A,APAF1,APBA1,APCDD1,APP,AR,ARFGEF1,ARFGEF3,ARHGAP27,ARHGAP28,ARHGEF28,ARHGEF6,ARID2,ARID4A,ARRB1,ARSL,ASAP2,ATF6B,ATF7,ATL1,AT…	691
Cancer,Hematological Disease,Organismal Injury and Abnormalities	Hematopoietic neoplasm	2.10E-66	65.6778	1.45833e-65	64.8361	1.282	AASS,ABCA6,ABCC1,ABCG2,ABI1,ACACA,ACBD5,ACE,ACER2,ADAMTS9,ADAR,ADARB1,ADGRA2,ADGRF5,ADK,ADORA3,ADRA1D,ADSS1,AFAP1L1,AFDN,AFF1,AGTPBP1,AHCTF1,AHCYL2,AHNAK2,AHR,AKAP13,AKAP9,ALDH2,AMIGO3,AMOT,ANKHD1-EIF4EBP3,ANKRD20A4P (includes others),ANKRD24,ANKRD28,ANKRD33,ANKRD36,ANKS1A,APAF1,APBA1,APCDD1,APP,AR,ARFGEF1,ARFGEF3,ARHGAP27,ARHGAP28,ARHGEF28,ARHGEF6,ARID2,ARID4A,ARRB1,ARSL,ASAP2,ATF6B,ATF7,ATL1,AT…	690
Cancer,Endocrine System Disorders,Organismal Injury and Abnormalities,Reproductive System Disease	Gonadal tumor	6.93E-30	29.1593	2.43158e-29	28.6141	1.276	ABCA3,ABCA6,ABR,ADAMTS10,ADAMTS9,ADGRF5,ADK,ADORA3,AGTPBP1,AHNAK2,AKAP9,ANKRD24,ANKRD36,APBA1,APCDD1,AR,ARHGEF12,ARHGEF28,ARID2,ASAP1,ATP1A1,ATR,AXIN2,BCL2L11,BDH1,BMX,BRCA2,C2orf81,CAMKK2,CAST,CBL,CCDC180,CCDC80,CCDC88C,CD109,CD74,CDK19,CDK6,CDK7,CDS2,CEP120,CEP290,CEP295,CFAP96,CFB,CHM,CLDN7,CLIP3,CLU,COL7A1,CORO2B,CPEB4,CPNE3,CREBRF,CRHBP,CSF2RB,CTDSPL,CUL9,CYP1A1,DAB2,DACH1,DCHS1,DCLRE1A,DDIA…	309
Cellular Movement,Immune Cell Trafficking	Cell movement of lymphoid cells	1.57E-07	6.8041	1.75615e-07	6.75544	1.266	ABCC1,ACKR3,ADAR,APOD,APP,AR,BCL9,BMPR2,CBL,CCL23,CCL5,CCR7,CD74,CMKLR1,CSF2RB,CX3CL1,CYSLTR1,DOCK8,DPP4,ETS1,FOXO1,FOXP1,GATA2,HDAC6,HGF,IL6,IL7,INPP5D,IRF6,ITGA1,ITGA2,ITGA6,JAK1,JAM3,KDR,KMT2C,LAMA4,LAT,LCP1,MAML1,MERTK,MTOR,NEDD9,NFATC1,NOTCH1,PIK3CG,PIK3R2,PLCG1,PPARG,PRKCQ,PRKN,PTGDR2,PTPRB,RGS5,RORA,RPTOR,SATB1,SETD2,SHC1,SMAD4,STAT1,STING1,TGFBR2,TNFSF4,TNFSF9,TRPV1,VAV3,VIP	68
Cellular Movement,Immune Cell Trafficking	Cell movement of lymphatic system cells	7.80E-08	7.10791	9.10152e-08	7.04089	1.264	ABCC1,ACKR3,ADAR,APOD,APP,AR,BCL9,BMPR2,CBL,CCL23,CCL5,CCR7,CD74,CIB1,CLEC11A,CMKLR1,CSF2RB,CX3CL1,CYSLTR1,DOCK8,DPP4,ETS1,FOXO1,FOXP1,GATA2,HDAC6,HGF,IL6,IL7,INPP5D,IRF6,ITGA1,ITGA2,ITGA6,JAK1,JAM3,KDR,KMT2C,LAMA4,LAT,LCP1,MAML1,MERTK,MTOR,NEDD9,NFATC1,NOTCH1,PIK3CG,PIK3R2,PLCG1,PPARG,PRKCQ,PRKN,PTGDR2,PTPRB,RGS5,RORA,RPTOR,SATB1,SETD2,SHC1,SMAD4,STAT1,STING1,TGFBR2,TNFSF4,TNFSF9,TRPV1,VAV3,VIP	70
Cancer,Gastrointestinal Disease,Hepatic System Disease,Organismal Injury and Abnormalities	Liver tumor	2.51E-68	67.6003	1.87313e-67	66.7274	1.258	AASS,ABCA3,ABCA6,ABCC1,ABCG2,ACACA,ACE,ACKR3,ACVR2A,ADAMTS10,ADAMTS9,ADAR,ADARB1,ADCK1,ADGRA2,ADGRF5,ADK,ADORA3,ADRA1D,ADRA2A,AFAP1L1,AFDN,AFF1,AGTPBP1,AHCTF1,AHNAK2,AHR,AKAP13,AKAP9,ALDH2,AMOT,ANKHD1-EIF4EBP3,ANKRD20A4P (includes others),ANKRD24,ANKRD36,ANKS1A,ANO6,APAF1,APBA1,APCDD1,APP,AR,ARFGEF1,ARFGEF2,ARFGEF3,ARHGAP27,ARHGEF12,ARHGEF28,ARID2,ARID4A,ARRB1,ARSG,ARSL,ASAP1,ASAP2,ATAT1,ATE1,ATF…	723
Cancer,Organismal Injury and Abnormalities	Extrapancreatic malignant tumor	4.50E-114	113.347	1.21622e-112	111.915	1.251	AASS,ABCA3,ABCA6,ABCB7,ABCC1,ABCG2,ABI1,ABR,ACACA,ACBD4,ACBD5,ACE,ACER2,ACKR3,ACVR2A,ADAMTS10,ADAMTS9,ADAR,ADARB1,ADCK1,ADCY9,ADGRA2,ADGRF5,ADK,ADORA3,ADRA1D,ADRA2A,ADSS1,AFAP1L1,AFDN,AFF1,AGTPBP1,AHCTF1,AHCYL2,AHNAK2,AHR,AKAP13,AKAP9,AKR1E2,ALDH2,AMIGO3,AMOT,ANKHD1-EIF4EBP3,ANKRD20A4P (includes others),ANKRD23,ANKRD24,ANKRD28,ANKRD33,ANKRD36,ANKRD65,ANKS1A,ANO6,APAF1,APBA1,APCDD1,APOD,APOLD1,APP…	1195
Organismal Injury and Abnormalities,Renal and Urological Disease	Renal lesion	5.98E-32	31.2233	2.19048e-31	30.6595	1.247	ACE,ACVR2A,ADAMTS9,ADGRF5,ADORA3,ADSS1,AFDN,AKAP9,ALDH2,ANKRD36,APOD,APP,AR,ARFGEF3,ARID2,ASAP1,ATF7,ATP13A3,ATR,AXIN2,BCOR,BFAR,BRCA2,BRME1,C2CD2,C2orf81,CALCRL,CCDC150,CCDC80,CCL5,CD34,CDK5RAP2,CDK6,CEP120,CEP170,CEP20,CGNL1,CHD4,CHURC1-FNTB,CIT,CLDN7,CLIP3,CLOCK,CLU,COL7A1,CRACD,CREBRF,CRLF1,CRYBG1,CSF2RB,CSMD2,CTDSPL,CUL9,CX3CL1,CYP1A1,DACH1,DCAF11,DCC,DCHS1,DCLRE1A,DENND5A,DIRAS1,DNAJC16,DNA…	295
Cancer,Dermatological Diseases and Conditions,Organismal Injury and Abnormalities	Skin cancer	3.28E-106	105.484	6.56e-105	104.183	1.238	AASS,ABCA3,ABCA6,ABCB7,ABCC1,ABCG2,ABI1,ABR,ACBD4,ACBD5,ACE,ACKR3,ACVR2A,ADAMTS10,ADAMTS9,ADAR,ADARB1,ADCK1,ADCY9,ADGRA2,ADGRF5,ADK,ADORA3,ADSS1,AFAP1L1,AFDN,AFF1,AGTPBP1,AHCTF1,AHCYL2,AHNAK2,AHR,AKAP13,AKAP9,AKR1E2,ALDH2,AMIGO3,AMOT,ANKHD1-EIF4EBP3,ANKRD20A4P (includes others),ANKRD23,ANKRD24,ANKRD28,ANKRD33,ANKRD36,ANKS1A,ANO6,APAF1,APBA1,APCDD1,APOD,APP,AR,ARFGEF1,ARFGEF2,ARFGEF3,ARHGAP19,ARHG…	974
Cardiovascular System Development and Function,Embryonic Development,Organ Development,Organismal Development,Tissue Development	Cardiogenesis	1.36E-11	10.8665	2.46377e-11	10.6084	1.235	ACKR3,ADAMTS9,AKAP13,AR,ARID2,ATE1,ATF7,AXIN2,BCOR,BMPR2,CALCRL,CC2D2A,CCL5,CEP290,CHD4,CHD7,CRIP1,DCHS1,DYNC2H1,EP300,FAT4,FLRT2,FLT1,FMNL2,FOXM1,FOXO1,FOXP1,FRS2,GYS1,HDAC9,HEY2,HSPG2,IFT172,IL6,JARID2,JPH2,KCNQ1,KDR,KIT,KLF11,LTBP1,MAML1,MAML3,MAP2K6,MAP3K1,MECOM,MED12,MRTFB,MTOR,NCSTN,NF1,NFATC1,NIPBL,NOTCH1,NPR1,NRP2,PHC1,PLCB1,PLXND1,PPARG,PRDM1,PRKDC,PTPN11,REST,RGS12,RPS6KA2,RXRB,SCGB3A1,…	85
Cancer,Organismal Injury and Abnormalities,Renal and Urological Disease	Renal cancer	1.52E-29	28.8182	5.27778e-29	28.2775	1.23	ACVR2A,ADGRF5,ADORA3,ADSS1,AFDN,AKAP9,ALDH2,ANKRD36,APOD,APP,AR,ARFGEF3,ARID2,ASAP1,ATF7,ATP13A3,ATR,AXIN2,BCOR,BFAR,BRCA2,BRME1,C2CD2,C2orf81,CALCRL,CCDC150,CCDC80,CCL5,CD34,CDK5RAP2,CDK6,CEP170,CEP20,CGNL1,CHD4,CHURC1-FNTB,CIT,CLDN7,CLIP3,CLOCK,CLU,COL7A1,CRACD,CREBRF,CRLF1,CRYBG1,CSF2RB,CSMD2,CTDSPL,CUL9,CX3CL1,CYP1A1,DACH1,DCAF11,DCC,DCHS1,DCLRE1A,DENND5A,DIRAS1,DNAJC16,DNALI1,DNMBP,DOCK8,DOP…	275
Cancer,Organismal Injury and Abnormalities	Hematological or lymphatic system tumor	2.69E-67	66.5702	1.9635e-66	65.707	1.225	AASS,ABCA6,ABCC1,ABCG2,ABI1,ACACA,ACBD5,ACE,ACER2,ADAMTS9,ADAR,ADARB1,ADGRA2,ADGRF5,ADK,ADORA3,ADRA1D,ADSS1,AFAP1L1,AFDN,AFF1,AGTPBP1,AHCTF1,AHCYL2,AHNAK2,AHR,AKAP13,AKAP9,ALDH2,AMIGO3,AMOT,ANKHD1-EIF4EBP3,ANKRD20A4P (includes others),ANKRD24,ANKRD28,ANKRD33,ANKRD36,ANKS1A,APAF1,APBA1,APCDD1,APP,AR,ARFGEF1,ARFGEF3,ARHGAP27,ARHGAP28,ARHGEF28,ARHGEF6,ARID2,ARID4A,ARRB1,ARSL,ASAP2,ATF6B,ATF7,ATL1,AT…	695
Cancer,Organismal Injury and Abnormalities,Reproductive System Disease	Tumorigenesis of reproductive tract	1.25E-86	85.9031	1.45349e-85	84.8376	1.219	AASS,ABCA3,ABCA6,ABCB7,ABCC1,ABCG2,ABI1,ABR,ACE,ACER2,ACVR2A,ADAMTS10,ADAMTS9,ADARB1,ADCK1,ADCY9,ADGRF5,ADK,ADORA3,AFDN,AFF1,AGTPBP1,AHCTF1,AHCYL2,AHNAK2,AHR,AKAP13,AKAP9,ALDH2,AMOT,ANKHD1-EIF4EBP3,ANKRD24,ANKRD28,ANKRD36,ANKS1A,ANO6,APBA1,APCDD1,APOD,APOLD1,APP,AR,ARFGEF1,ARFGEF2,ARFGEF3,ARHGAP19,ARHGAP27,ARHGEF12,ARHGEF28,ARHGEF6,ARID2,ARID4A,ARRB1,ARRDC3,ARSL,ASAP1,ATAD2B,ATG2A,ATL1,ATP10A,ATP…	773
Cancer,Organismal Injury and Abnormalities,Reproductive System Disease	Female genital neoplasm	6.02E-85	84.2204	6.54348e-84	83.1842	1.219	AASS,ABCA3,ABCA6,ABCB7,ABCC1,ABCG2,ABI1,ABR,ACE,ACER2,ACVR2A,ADAMTS10,ADAMTS9,ADARB1,ADCK1,ADCY9,ADGRF5,ADK,ADORA3,AFDN,AFF1,AGTPBP1,AHCTF1,AHCYL2,AHNAK2,AHR,AKAP13,AKAP9,ALDH2,AMOT,ANKHD1-EIF4EBP3,ANKRD24,ANKRD28,ANKRD36,ANKS1A,ANO6,APBA1,APCDD1,APOD,APOLD1,APP,AR,ARFGEF1,ARFGEF2,ARFGEF3,ARHGAP19,ARHGAP27,ARHGEF12,ARHGEF28,ARHGEF6,ARID2,ARID4A,ARRB1,ARRDC3,ARSG,ARSL,ASAP1,ATAD2B,ATG2A,ATL1,ATP10…	775
Cancer,Endocrine System Disorders,Organismal Injury and Abnormalities,Reproductive System Disease	Ovarian tumor	1.78E-30	29.7496	6.35714e-30	29.1967	1.219	ABCA3,ABCA6,ABR,ADAMTS10,ADAMTS9,ADGRF5,ADK,ADORA3,AGTPBP1,AHNAK2,AKAP9,ANKRD24,ANKRD36,APBA1,APCDD1,AR,ARHGEF12,ARHGEF28,ARID2,ASAP1,ATP1A1,ATR,AXIN2,BCL2L11,BDH1,BMX,BRCA2,C2orf81,CAMKK2,CAST,CBL,CCDC180,CCDC80,CCDC88C,CD109,CD74,CDK19,CDK6,CDK7,CDS2,CEP120,CEP290,CEP295,CFAP96,CFB,CLDN7,CLIP3,CLU,COL7A1,CORO2B,CPEB4,CPNE3,CREBRF,CRHBP,CSF2RB,CTDSPL,CUL9,CYP1A1,DAB2,DACH1,DCHS1,DCLRE1A,DDIAS,DM…	299
Cancer,Endocrine System Disorders,Organismal Injury and Abnormalities	Neuroendocrine tumor	2.80E-44	43.5528	1.26697e-43	42.8972	1.216	AASS,ABCA6,ABCB7,ABCC1,ABCG2,ABR,ACBD5,ACE,ACVR2A,ADAR,ADARB1,ADCY9,ADORA3,ADRA1D,ADRA2A,ADSS1,AFDN,AHNAK2,AHR,AKAP13,ALDH2,AMOT,ANKHD1-EIF4EBP3,ANKRD20A4P (includes others),ANKRD24,ANKRD28,ANKRD33,ANO6,APAF1,AR,ARHGAP19,ARHGEF12,ARHGEF6,ARID2,ARRB1,ARSG,ATF7,ATP10A,ATP11A,ATP1A1,ATP7A,ATP9A,BCAS3,BCL9,BCOR,BEND4,BIRC6,BMAL1,BMX,BOC,BRCA2,C2orf81,CARF,CAST,CAVIN2,CBL,CC2D2A,CCDC144A,CCDC180,CCDC8…	446
Cancer,Organismal Injury and Abnormalities	Cancer of cells	4.89E-67	66.3107	3.46809e-66	65.4599	1.215	AASS,ABCA6,ABCC1,ABCG2,ABR,ACE,ACVR2A,ADAMTS10,ADAMTS9,ADAR,ADARB1,ADCY9,ADGRA2,ADGRF5,ADORA3,ADRA1D,AFAP1L1,AFDN,AFF1,AGTPBP1,AHCTF1,AHCYL2,AHNAK2,AHR,AKAP13,AKAP9,ALDH2,AMIGO3,AMOT,ANKHD1-EIF4EBP3,ANKRD20A4P (includes others),ANKRD24,ANKRD36,ANKRD65,ANKS1A,ANO6,APBA1,APCDD1,APOD,APP,AR,ARFGEF2,ARFGEF3,ARHGAP28,ARHGEF12,ARHGEF28,ARHGEF6,ARID2,ARID4A,ARSG,ASAP1,ASAP2,ASL,ATAD2B,ATAT1,ATF7,ATG2A,A…	778
Metabolic Disease,Organismal Injury and Abnormalities	Amyloidosis	1.68E-10	9.77469	2.7541e-10	9.56002	1.213	ABCG2,ACE,ADAR,ADCY9,ADRA1D,ADRA2A,AFF1,ALDH2,ANKS1A,APBA1,APOD,APP,AR,ARFGEF2,ATG2A,ATP1A1,ATP6V1G2,ATR,BACE2,BCAS3,BCL2L11,C8orf44-SGK3,CAST,CCL5,CD34,CD74,CDON,CELF1,CELF2,CEP170,CFB,CHRNA7,CIB1,CLU,CX3CL1,CYP39A1,DAB2,DCAF7,DCC,DPP4,DYSF,EFR3A,EHMT2,EML6,EPHA4,ERN1,FBXL7,FLT1,FOLH1,FRRS1,GAB2,GABRP,GHR,GPC5,GPER1,HBP1,HDAC9,HERC2,HLA-DRB1,HMCN1,HSPA1A,HSPG2,IDE,IGFBP5,IL6,INPP5D,IQGAP1,IQGAP2…	161
Cancer,Organismal Injury and Abnormalities	Genitourinary tumor	8.94E-102	101.049	1.25915e-100	99.8999	1.212	AASS,ABCA3,ABCA6,ABCB7,ABCC1,ABCG2,ABI1,ABR,ACACA,ACBD5,ACE,ACER2,ACVR2A,ADAMTS10,ADAMTS9,ADAR,ADARB1,ADCK1,ADCY9,ADGRA2,ADGRF5,ADK,ADORA3,ADRA1D,ADRA2A,ADSS1,AFDN,AFF1,AGTPBP1,AHCTF1,AHCYL2,AHNAK2,AHR,AKAP13,AKAP9,AKR1E2,ALDH2,AMOT,ANKHD1-EIF4EBP3,ANKRD20A4P (includes others),ANKRD23,ANKRD24,ANKRD28,ANKRD33,ANKRD36,ANKS1A,ANO6,APAF1,APBA1,APCDD1,APOD,APOLD1,APP,AR,ARFGEF1,ARFGEF2,ARFGEF3,ARHGAP1…	1055
Cancer,Hematological Disease,Organismal Injury and Abnormalities	Neoplasia of blood cells	5.73E-65	64.2418	3.76974e-64	63.4237	1.211	AASS,ABCA6,ABCC1,ABCG2,ABI1,ACACA,ACBD5,ACE,ACER2,ADAMTS9,ADAR,ADARB1,ADGRA2,ADGRF5,ADORA3,ADRA1D,ADSS1,AFAP1L1,AFDN,AFF1,AGTPBP1,AHCTF1,AHCYL2,AHNAK2,AHR,AKAP13,AKAP9,ALDH2,AMIGO3,AMOT,ANKHD1-EIF4EBP3,ANKRD20A4P (includes others),ANKRD24,ANKRD28,ANKRD33,ANKRD36,ANKS1A,APAF1,APBA1,APCDD1,APP,AR,ARFGEF1,ARFGEF3,ARHGAP28,ARHGEF28,ARHGEF6,ARID2,ARID4A,ARRB1,ARSL,ASAP2,ATF6B,ATF7,ATL1,ATP10A,ATP11A,A…	672
Cancer,Organismal Injury and Abnormalities,Tumor Morphology	Invasion of solid tumor	4.79E-10	9.31966	7.50784e-10	9.12449	1.211	AR,ASAP1,CCN3,CLU,ETS1,FOXM1,GAB2,HGF,IGFBP5,IL24,IL6,ITGA1,ITGA2,ITGA6,ITGB4,MTOR,NCOA3,NEDD9,NFATC1,NOTCH1,PLD1,REL,RHOBTB2,SFRP1,SHC1,SOX7,SPHK1,TGFBR2,VAV3,VCAN,VIM,ZBTB16	32
Cancer,Endocrine System Disorders,Organismal Injury and Abnormalities	Extrapancreatic neuroendocrine tumor	2.79E-45	44.5544	1.27982e-44	43.8929	1.208	AASS,ABCA6,ABCB7,ABCC1,ABCG2,ABR,ACBD5,ACE,ACVR2A,ADAR,ADARB1,ADCY9,ADORA3,ADRA1D,ADRA2A,ADSS1,AFDN,AHNAK2,AHR,AKAP13,ALDH2,AMOT,ANKHD1-EIF4EBP3,ANKRD24,ANKRD28,ANKRD33,ANO6,APAF1,AR,ARHGAP19,ARHGEF12,ARHGEF6,ARID2,ARRB1,ARSG,ATF7,ATP10A,ATP11A,ATP1A1,ATP7A,ATP9A,BCAS3,BCL9,BCOR,BEND4,BIRC6,BMAL1,BMX,BOC,BRCA2,C2orf81,CARF,CAST,CAVIN2,CBL,CC2D2A,CCDC144A,CCDC180,CCDC88C,CD74,CD93,CDC14A,CDK6,CECR…	437
Cancer,Organismal Injury and Abnormalities	Primary neoplasm	1.06E-07	6.97469	1.21005e-07	6.9172	1.195	ADGRA2,AFAP1L1,AKAP13,ANKRD20A4P (includes others),ANKRD36,ASL,ATP7A,BRCA2,CDK6,CELF2,CHD4,CLU,CSF2RB,CTDSPL,EDNRB,EFNB2,EHMT2,EP300,ETV1,EZH2,FBXO25,FLT1,FOXO1,FOXP1,HGF,HLA-F,IL6,IQSEC1,ITPKB,KCNQ1,KDR,KIT,KLHL3,LAMB2,LONRF2,MACF1,MED12,MT-CO1,MT-CO2,MT-ND6,MTHFD2,MTOR,NCR3LG1,NF1,NOTCH1,NPFFR2,OAZ1,PDXDC1,PIK3R2,PLCG1,PLXNB1,POLA1,POTEI,PPARG,PRDM1,PRKDC,PRKN,PTP4A3,PTPN11,REL,RNF144B,RPS6KA2,…	76
Cellular Growth and Proliferation,Tissue Development	Proliferation of epithelial cells	6.22E-09	8.20621	8.23841e-09	8.08416	1.182	ACVR2A,AHR,AR,ATP7A,BMX,CASK,CCL5,CD109,CDK6,CELF1,CLU,DAB2,DACH1,DCC,E2F8,EDA,EDNRB,EFNB2,EP300,EPAS1,ERN1,EZH2,FLT1,FOXM1,FOXP1,FRS2,FST,GAB2,GATA2,HDAC6,HGF,IFT172,IL24,IL6,INHBB,IRF6,IRX5,ITGA1,ITGA6,ITGB4,KDR,KIT,LAMC1,MAP2K6,MCC,MKI67,MT2A,MTOR,MTSS1,NCSTN,NFATC1,NFIB,NOTCH1,PC,POMC,PPARG,PRKCH,PRKD2,PRKDC,RASGRF2,REL,RNF144B,SFN,SFRP1,SKIC2,SMAD4,SPHK1,SPTBN1,ST8SIA1,STING1,TGFBR2,TGFBR3,T…	79
Cellular Development,Cellular Growth and Proliferation,Connective Tissue Development and Function,Organismal Development,Tissue Development	Development of connective tissue cells	5.92E-07	6.22768	5.99797e-07	6.222	1.164	ADK,AHR,ASAP1,AXIN2,BMAL1,BMPR2,CAST,CNOT3,CYP1A1,EBF1,EP400,ETV1,FLT1,FOXO1,FRS2,FST,GATA2,IL6,IL7,INPP5D,ITGBL1,KIT,KMT2A,LAT,MRPS18B,MTOR,NF1,NFATC1,NFIA,NOTCH1,OSTM1,PIK3CG,PPARG,PRDM1,PTPN11,SCIN,SFRP1,SMAD1,STAT1,STC1,TEK,TGFBR2,TNFRSF11A,TNFSF9,TNS3,VAV3,VCAN	47
Cancer,Organismal Injury and Abnormalities,Tumor Morphology	Invasion of tumor	1.69E-08	7.77211	2.12045e-08	7.67357	1.146	ACKR3,AR,ASAP1,CCN3,CIB1,CLU,COL7A1,DPP4,DROSHA,ETS1,FOXM1,GAB2,HGF,IGFBP5,IL24,IL6,IQSEC1,ITGA1,ITGA2,ITGA6,ITGB4,MTOR,NCOA3,NEDD9,NFATC1,NOTCH1,PLD1,RALGAPA2,REL,RHOBTB2,SFRP1,SHC1,SOX7,SPHK1,TGFBR2,VAV3,VCAN,VIM,ZBTB16	39
Cancer,Hematological Disease,Immunological Disease,Organismal Injury and Abnormalities	B-cell neoplasm	9.93E-43	42.0031	4.31739e-42	41.3648	1.144	AASS,ABCC1,ABCG2,ACE,ADAMTS9,ADGRA2,ADGRF5,ADORA3,ADRA1D,AFF1,AGTPBP1,AHCTF1,AHCYL2,AHNAK2,AHR,AMIGO3,AMOT,ANKRD20A4P (includes others),ANKRD24,ANKRD36,ANKS1A,APBA1,APCDD1,APP,AR,ARFGEF3,ARHGEF28,ARID2,ARID4A,ASAP2,ATP10A,ATP11A,ATP13A3,ATP7A,ATR,BACE2,BAZ2A,BAZ2B,BCL2L11,BCOR,BIRC6,BMAL2,BRCA2,BRME1,CALCRL,CAMKK2,CAVIN2,CBL,CC2D2A,CCDC180,CCL5,CCR7,CD34,CD74,CDC14A,CDK6,CDON,CELF2,CEP120,CEP20,C…	396
Cancer,Gastrointestinal Disease,Organismal Injury and Abnormalities	Hepatobiliary neoplasm	2.15E-71	70.6676	1.72e-70	69.7645	1.133	AASS,ABCA3,ABCA6,ABCC1,ABCG2,ABI1,ACACA,ACE,ACKR3,ACVR2A,ADAMTS10,ADAMTS9,ADAR,ADARB1,ADCK1,ADGRA2,ADGRF5,ADK,ADORA3,ADRA1D,ADRA2A,AFAP1L1,AFDN,AFF1,AGTPBP1,AHCTF1,AHNAK2,AHR,AKAP13,AKAP9,ALDH2,AMOT,ANKHD1-EIF4EBP3,ANKRD20A4P (includes others),ANKRD24,ANKRD36,ANKS1A,ANO6,APAF1,APBA1,APCDD1,APP,AR,ARFGEF1,ARFGEF2,ARFGEF3,ARHGAP27,ARHGEF12,ARHGEF28,ARID2,ARID4A,ARRB1,ARSG,ARSL,ASAP1,ASAP2,ATAT1,ATE…	757
Cancer,Hematological Disease,Organismal Injury and Abnormalities	Myelodysplastic syndrome or leukemia	4.08E-55	54.3893	2.21739e-54	53.6542	1.133	ABCA6,ABCC1,ABCG2,ACACA,ACBD5,ACE,ACER2,ADAMTS9,ADARB1,ADGRA2,ADGRF5,ADORA3,ADRA1D,ADSS1,AFDN,AFF1,AHCTF1,AHCYL2,AHNAK2,AKAP13,AKAP9,ALDH2,AMOT,ANKHD1-EIF4EBP3,ANKRD20A4P (includes others),ANKRD24,ANKRD28,ANKRD33,ANKRD36,ANKS1A,APAF1,APCDD1,APP,AR,ARFGEF1,ARFGEF3,ARHGAP28,ARHGEF28,ARHGEF6,ARID2,ARID4A,ARSL,ASAP2,ATF6B,ATL1,ATP10A,ATP11A,ATP13A3,ATP2B4,ATP6V1A,ATR,AXIN2,BAZ2A,BAZ2B,BCAS3,BCL2L11,B…	532
Cardiovascular System Development and Function,Organismal Development	Sprouting angiogenesis	2.00E-09	8.69897	2.86123e-09	8.54345	1.133	ADAMTS9,ADGRA2,E2F8,FLT1,JAK1,JCAD,KDR,LEF1,MECOM,NOTCH1,PIK3C2A,PLCB1,RNF213,SEMA6A,SH2B3,SHROOM2,SMAD1,SMARCA1,SP1,STAB2,TEK,TJP1,TSPAN18,VIM	24
Cancer,Hematological Disease,Immunological Disease,Organismal Injury and Abnormalities	Leukemia	2.31E-54	53.6364	1.21579e-53	52.9151	1.13	ABCA6,ABCC1,ABCG2,ACACA,ACBD5,ACE,ACER2,ADAMTS9,ADARB1,ADGRA2,ADGRF5,ADORA3,ADRA1D,ADSS1,AFDN,AFF1,AHCTF1,AHCYL2,AHNAK2,AKAP13,AKAP9,ALDH2,AMOT,ANKHD1-EIF4EBP3,ANKRD20A4P (includes others),ANKRD24,ANKRD28,ANKRD33,ANKRD36,ANKS1A,APAF1,APCDD1,APP,AR,ARFGEF1,ARFGEF3,ARHGAP28,ARHGEF28,ARHGEF6,ARID2,ARID4A,ARSL,ASAP2,ATF6B,ATL1,ATP10A,ATP11A,ATP13A3,ATP2B4,ATP6V1A,ATR,AXIN2,BAZ2A,BAZ2B,BCAS3,BCL2L11,B…	523
Cancer,Organismal Injury and Abnormalities	Cancer of secretory structure	8.99E-124	123.046	7.49167e-122	121.125	1.129	ABCA3,ABCA6,ABCB7,ABCC1,ABCG2,ABI1,ABR,ACBD5,ACE,ACER2,ACKR3,ACVR2A,ADAMTS10,ADAMTS9,ADAR,ADARB1,ADCY9,ADGRA2,ADORA3,ADRA1D,ADRA2A,ADSS1,AFAP1L1,AFDN,AFF1,AGTPBP1,AHCTF1,AHCYL2,AHNAK2,AHR,AKAP13,AKAP9,ALDH2,AMIGO3,AMOT,ANKHD1-EIF4EBP3,ANKRD20A4P (includes others),ANKRD23,ANKRD24,ANKRD28,ANKRD33,ANKRD36,ANKRD65,ANKS1A,ANO6,APAF1,APBA1,APCDD1,APOD,APOLD1,APP,AR,ARFGEF1,ARFGEF2,ARFGEF3,ARHGAP27,ARHG…	1091
Neurological Disease,Organismal Injury and Abnormalities	Epilepsy or neurodevelopmental disorder	3.17E-18	17.4989	8.52151e-18	17.0695	1.129	ABCC1,ADARB1,ADCY9,ADRA1D,ADRA2A,AGTPBP1,ALDH2,APP,ARFGEF1,ARFGEF3,ARID2,ARRDC3,ASL,ATP6V1A,ATP9A,ATR,AXIN2,BAZ2B,BCAS3,BCL2L11,BTBD8,CALCRL,CASK,CBL,CC2D2A,CDK19,CDKL5,CELF2,CHD7,CLCN3,CLIC2,CLU,CNOT3,CRACD,CRAMP1,CSDE1,DCC,DDX39B,DENND5A,DMXL2,DYNC2H1,EDNRB,EFHC1,EFNB2,EP300,EP400,EPM2A,EZH2,FBXW11,FOXP1,GABRP,GHR,GMPPA,GOLGA8K (includes others),HBP1,HDAC9,HECW2,HEPH,HERC1,HIP1,HSPA1A,HTR1B,HTR…	159
Cancer,Organismal Injury and Abnormalities,Renal and Urological Disease	Upper urinary tract tumor	1.10E-30	29.9586	3.94265e-30	29.4042	1.123	ACVR2A,ADAMTS9,ADGRF5,ADORA3,ADSS1,AFDN,AKAP9,ALDH2,ANKRD36,APOD,APP,AR,ARFGEF3,ARID2,ASAP1,ATF7,ATP13A3,ATR,AXIN2,BCOR,BFAR,BRCA2,BRME1,C2CD2,C2orf81,CALCRL,CCDC150,CCDC80,CCL5,CD34,CDK5RAP2,CDK6,CEP170,CEP20,CGNL1,CHD4,CHURC1-FNTB,CIT,CLDN7,CLIP3,CLOCK,CLU,COL7A1,CRACD,CREBRF,CRLF1,CRYBG1,CSF2RB,CSMD2,CTDSPL,CUL9,CX3CL1,CYP1A1,DACH1,DCAF11,DCC,DCHS1,DCLRE1A,DENND5A,DIRAS1,DNAJC16,DNALI1,DNMBP,D…	281
Cancer,Organismal Injury and Abnormalities,Renal and Urological Disease	Renal tumor	4.14E-30	29.383	1.4629e-29	28.8348	1.123	ACVR2A,ADAMTS9,ADGRF5,ADORA3,ADSS1,AFDN,AKAP9,ALDH2,ANKRD36,APOD,APP,AR,ARFGEF3,ARID2,ASAP1,ATF7,ATP13A3,ATR,AXIN2,BCOR,BFAR,BRCA2,BRME1,C2CD2,C2orf81,CALCRL,CCDC150,CCDC80,CCL5,CD34,CDK5RAP2,CDK6,CEP170,CEP20,CGNL1,CHD4,CHURC1-FNTB,CIT,CLDN7,CLIP3,CLOCK,CLU,COL7A1,CRACD,CREBRF,CRLF1,CRYBG1,CSF2RB,CSMD2,CTDSPL,CUL9,CX3CL1,CYP1A1,DACH1,DCAF11,DCC,DCHS1,DCLRE1A,DENND5A,DIRAS1,DNAJC16,DNALI1,DNMBP,D…	279
Gastrointestinal Disease,Hepatic System Disease,Organismal Injury and Abnormalities	Liver lesion	2.56E-69	68.5918	1.93939e-68	67.7123	1.105	AASS,ABCA3,ABCA6,ABCC1,ABCG2,ACACA,ACE,ACKR3,ACVR2A,ADAMTS10,ADAMTS9,ADAR,ADARB1,ADCK1,ADGRA2,ADGRF5,ADK,ADORA3,ADRA1D,ADRA2A,AFAP1L1,AFDN,AFF1,AGTPBP1,AHCTF1,AHNAK2,AHR,AKAP13,AKAP9,ALDH2,AMOT,ANKHD1-EIF4EBP3,ANKRD20A4P (includes others),ANKRD24,ANKRD36,ANKS1A,ANO6,APAF1,APBA1,APCDD1,APP,AR,ARFGEF1,ARFGEF2,ARFGEF3,ARHGAP27,ARHGEF12,ARHGEF28,ARID2,ARID4A,ARRB1,ARSG,ARSL,ASAP1,ASAP2,ATAT1,ATE1,ATF…	749
Cell Cycle	Cell cycle progression	9.53E-15	14.0209	2.17084e-14	13.6634	1.104	ABCG2,ACKR3,ADARB1,ADORA3,AHR,AKAP9,ANKS1A,APAF1,APP,AR,ARID2,ARRB1,ATAT1,ATE1,ATR,BCL2L11,BIRC6,BMAL1,BMAL2,BMPR2,BRCA2,CAST,CBL,CCNB1IP1,CDC14A,CDK19,CDK6,CDK7,CELF1,CEP192,CHD4,CHD7,CIT,CLU,CUL9,CYSLTR1,DDIAS,DPP4,EIF6,EP300,EP400,EPM2A,ETS1,EZH2,FBXL7,FLT1,FOXM1,FOXO1,FRS2,GAB2,GATA2,GHR,GPER1,HBP1,HECW2,HERC2,HGF,HNRNPH1,HSPA1A,IER3,IFIH1,IGFBP5,IL24,IL6,IL7,INPP5D,IQGAP1,ITGA2,ITGB4,JADE3,J…	157
Cancer,Organismal Injury and Abnormalities,Renal and Urological Disease	Upper renal tract carcinoma	6.36E-28	27.1965	2.16327e-27	26.6649	1.103	ACVR2A,ADGRF5,ADORA3,ADSS1,AFDN,AKAP9,ALDH2,ANKRD36,APOD,APP,AR,ARFGEF3,ARID2,ASAP1,ATF7,ATP13A3,ATR,AXIN2,BFAR,BRCA2,BRME1,C2CD2,C2orf81,CALCRL,CCDC150,CCDC80,CCL5,CDK5RAP2,CDK6,CEP170,CEP20,CGNL1,CHURC1-FNTB,CIT,CLDN7,CLIP3,CLOCK,CLU,COL7A1,CRACD,CREBRF,CRYBG1,CSF2RB,CTDSPL,CUL9,CX3CL1,CYP1A1,DACH1,DCAF11,DCLRE1A,DENND5A,DIRAS1,DNAJC16,DNALI1,DNMBP,DOCK8,DOP1A,E2F8,EEF1B2,EP300,EP400,EPAS1,ETS1…	257
Cancer,Organismal Injury and Abnormalities,Renal and Urological Disease	Kidney carcinoma	2.10E-27	26.6778	7e-27	26.1549	1.103	ACVR2A,ADGRF5,ADORA3,ADSS1,AFDN,AKAP9,ALDH2,ANKRD36,APOD,APP,AR,ARFGEF3,ARID2,ASAP1,ATF7,ATP13A3,ATR,AXIN2,BFAR,BRCA2,BRME1,C2CD2,C2orf81,CALCRL,CCDC150,CCDC80,CCL5,CDK5RAP2,CDK6,CEP170,CEP20,CGNL1,CHURC1-FNTB,CIT,CLDN7,CLIP3,CLOCK,CLU,COL7A1,CRACD,CREBRF,CRYBG1,CSF2RB,CTDSPL,CUL9,CX3CL1,CYP1A1,DACH1,DCAF11,DCLRE1A,DENND5A,DIRAS1,DNAJC16,DNALI1,DNMBP,DOCK8,DOP1A,E2F8,EEF1B2,EP300,EP400,EPAS1,ETS1…	255
Cancer,Neurological Disease,Organismal Injury and Abnormalities	Central nervous system cancer	1.39E-103	102.857	2.04412e-102	101.689	1.09	AASS,ABCA3,ABCA6,ABCB7,ABCC1,ABCG2,ABR,ACACA,ACBD5,ACE,ACKR3,ACVR2A,ADAMTS10,ADAMTS9,ADAR,ADARB1,ADCK1,ADGRA2,ADGRF5,ADRA1D,ADSS1,AFAP1L1,AFDN,AFF1,AGTPBP1,AHCTF1,AHNAK2,AHR,AKAP13,AKAP9,AKR1E2,ALDH2,AMIGO3,AMOT,ANKHD1-EIF4EBP3,ANKRD20A4P (includes others),ANKRD23,ANKRD24,ANKRD28,ANKRD36,ANKRD65,ANKS1A,ANO6,APAF1,APBA1,APCDD1,APP,AR,ARFGEF1,ARFGEF2,ARFGEF3,ARHGAP28,ARHGEF28,ARHGEF6,ARID2,ARID4A,A…	901
Cancer,Organismal Injury and Abnormalities	Abdominal neoplasm	4.74E-117	116.324	1.63448e-115	114.787	1.086	AASS,ABCA3,ABCA6,ABCB7,ABCC1,ABCG2,ABI1,ABR,ACACA,ACBD4,ACBD5,ACE,ACER2,ACKR3,ACVR2A,ADAMTS10,ADAMTS9,ADAR,ADARB1,ADCK1,ADCY9,ADGRA2,ADGRF5,ADK,ADORA3,ADRA1D,ADRA2A,ADSS1,AFAP1L1,AFDN,AFF1,AGTPBP1,AHCTF1,AHCYL2,AHNAK2,AHR,AKAP13,AKAP9,AKR1E2,ALDH2,AMIGO3,AMOT,ANKHD1-EIF4EBP3,ANKRD20A4P (includes others),ANKRD23,ANKRD24,ANKRD28,ANKRD33,ANKRD36,ANKRD65,ANKS1A,ANO6,APAF1,APBA1,APCDD1,APOD,APOLD1,APP…	1174
Cellular Growth and Proliferation,Connective Tissue Development and Function,Tissue Development	Proliferation of connective tissue cells	7.39E-10	9.13136	1.13344e-09	8.9456	1.078	ACACA,ADAR,AHR,AR,ARHGEF12,ATR,AXIN2,BCOR,BMPR2,BMX,BRCA2,CASK,CBL,CCDC80,CCN3,CD109,CD74,CDK6,CIB1,CSF2RB,DACH1,E2F8,EDNRB,EFNB2,EP300,EP400,ERN1,EZH2,FOXM1,FOXO1,FOXP1,FRS2,FST,GHR,GOLGB1,GPER1,HGF,HSPA1A,IFT172,IGFBP5,IL24,IL6,INHBB,IRF6,ITGA1,JAK1,KDM2B,KMT2A,KMT2C,LEF1,LIMA1,MAP2K6,MAP3K1,MCF2L,MKI67,MLLT6,MMP16,MRPS18B,MTOR,NCSTN,NF1,NFATC1,NOTCH1,NPR3,NRIP1,PBX1,PFKFB3,PLXNB1,POMC,PPARG,PR…	94
Gastrointestinal Disease,Organismal Injury and Abnormalities	Gastric lesion	6.48E-57	56.1884	3.72414e-56	55.429	1.067	AASS,ABCA6,ABCC1,ABR,ACBD4,ACBD5,ACVR2A,ADAMTS10,ADAMTS9,ADAR,ADARB1,ADCK1,ADCY9,ADGRA2,ADK,ADRA1D,ADRA2A,ADSS1,AFAP1L1,AFDN,AFF1,AGTPBP1,AHCTF1,AHCYL2,AHNAK2,AHR,AKAP13,AKAP9,ALDH2,ANKRD20A4P (includes others),ANKRD23,ANKRD24,ANKRD28,ANKRD36,ANKRD65,ANKS1A,APAF1,APBA1,APP,AR,ARFGEF1,ARHGAP19,ARHGAP28,ARHGEF6,ARID2,ARID4A,ASAP1,ASAP2,ATAD2B,ATG2A,ATP10A,ATP11A,ATP13A3,ATP2B4,ATP9A,ATR,AXIN2,B3GNT…	549
Cancer,Gastrointestinal Disease,Organismal Injury and Abnormalities	Stomach tumor	2.66E-56	55.5751	1.49438e-55	54.8255	1.067	AASS,ABCA6,ABCC1,ABR,ACBD4,ACBD5,ACVR2A,ADAMTS10,ADAMTS9,ADAR,ADARB1,ADCK1,ADCY9,ADGRA2,ADK,ADRA1D,ADRA2A,ADSS1,AFAP1L1,AFDN,AFF1,AGTPBP1,AHCTF1,AHCYL2,AHNAK2,AHR,AKAP13,AKAP9,ALDH2,ANKRD20A4P (includes others),ANKRD23,ANKRD24,ANKRD28,ANKRD36,ANKRD65,ANKS1A,APAF1,APBA1,APP,AR,ARFGEF1,ARHGAP19,ARHGAP28,ARHGEF6,ARID2,ARID4A,ASAP1,ASAP2,ATAD2B,ATG2A,ATP10A,ATP11A,ATP13A3,ATP2B4,ATP9A,ATR,AXIN2,B3GNT…	547
Cancer,Cardiovascular Disease,Organismal Injury and Abnormalities	Angioma	5.59E-14	13.2526	1.20474e-13	12.9191	1.067	ABCG2,ACKR3,AFDN,AR,ATR,BCOR,BMPR2,BRCA2,CD34,CLU,CSF2RB,CX3CL1,DAXX,EDNRB,EPAS1,EPHA4,EZH2,FANCB,FANCM,FAT4,FLNB,FLT1,GNA14,GNMT,HGF,IGFBP5,IL6,IQGAP2,JAK1,KDR,KIAA1549,KIT,KMT2A,KMT2C,LHX6,LIFR,MAP3K1,MECOM,MKI67,MLLT3,MTOR,NF1,NOTCH1,NPR1,NRP2,NSD1,PIK3CG,PPARG,PRDM1,PRKDC,PRKN,RANBP2,RCAN2,RNF213,SETD2,SH2B3,TEK,TGFBR2,TGFBR3,TSC1,VCAN	61
Cancer,Cardiovascular Disease,Organismal Injury and Abnormalities	Hemangioma	1.28E-13	12.8928	2.68908e-13	12.5704	1.067	ABCG2,ACKR3,AFDN,AR,ATR,BCOR,BMPR2,BRCA2,CD34,CLU,CSF2RB,CX3CL1,DAXX,EDNRB,EPAS1,EPHA4,EZH2,FANCB,FANCM,FAT4,FLNB,FLT1,GNA14,GNMT,HGF,IGFBP5,IL6,IQGAP2,JAK1,KDR,KIAA1549,KIT,KMT2A,KMT2C,LHX6,LIFR,MAP3K1,MECOM,MKI67,MLLT3,NF1,NOTCH1,NPR1,NRP2,NSD1,PIK3CG,PPARG,PRDM1,PRKDC,PRKN,RANBP2,RCAN2,RNF213,SETD2,SH2B3,TEK,TGFBR2,TGFBR3,TSC1,VCAN	60
Nutritional Disease,Organismal Injury and Abnormalities	Obesity	1.41E-12	11.8508	2.71154e-12	11.5668	1.067	ABCG2,ABI1,ACE,ADARB1,ADCY9,ADRA1D,ADRA2A,ADSS1,ALDH2,AMOT,APP,AR,ARRB1,ATP7B,AXIN2,B3GNT5,BMAL1,BORCS7-ASMT,C1QL3,CALCRL,CAMKK2,CAST,CAVIN2,CBL,CCL5,CELF1,CEP162,CHM,CHRNA7,CLOCK,CMKLR1,CNOT3,CRACD,CREBRF,CX3CL1,CYP4X1,DPP4,EML6,EP300,EPAS1,FLT1,FOXM1,FOXO1,GABRP,GGNBP2,GHR,GPER1,GYS1,HTR1B,HTR1D,IGFBP5,IL6,ITGAX,ITPR3,ITPRID2,KIT,KSR2,LAMA4,LPIN1,LPL,LRBA,LRRC8C,MED12,MGA,MKI67,MRAP2,MT-CO1,MT2…	115
Cancer,Hematological Disease,Immunological Disease,Organismal Injury and Abnormalities	Non-Hodgkin lymphoma	2.05E-32	31.6882	7.6779e-32	31.1148	1.066	AASS,ABCC1,ABCG2,ACE,ADAMTS9,ADAR,ADGRF5,ADORA3,AHNAK2,AHR,ALDH2,AMIGO3,AMOT,ANKRD24,ANKRD36,APBA1,APCDD1,APP,ARFGEF3,ARHGEF28,ARID2,ASAP2,ATP10A,ATP13A3,ATP7A,AXIN2,BAZ2B,BCL2L11,BCL9,BCOR,BIRC6,BRCA2,CALCRL,CAMKK2,CAVIN2,CC2D2A,CCL5,CCR7,CD34,CDK6,CDON,CELF2,CEP120,CHD4,CHD6,CLU,CNOT3,CORO2B,CPNE3,CRACD,CRYBG1,CSDE1,CSF2RB,CSMD2,CUL9,DCC,DCHS1,DCLRE1A,DENND11,DGKA,DNMBP,DOP1B,DPP4,DSTYK,DYSF,EB…	284
Cancer,Organismal Injury and Abnormalities	Squamous-cell carcinoma	1.40E-47	46.8539	6.57277e-47	46.1823	1.054	ABCA6,ABCC1,ABCG2,ACE,ACVR2A,ADAMTS10,ADAR,ADARB1,ADCY9,AFDN,AFF1,AHCTF1,AHNAK2,AHR,AKAP13,AKAP9,ALDH2,ANKHD1-EIF4EBP3,ANKRD20A4P (includes others),ANKRD24,ANKRD36,ANKRD65,ANO6,APBA1,APCDD1,APOD,APP,AR,ARFGEF3,ARHGAP28,ARHGEF12,ARID2,ARID4A,ARSG,ASAP1,ASAP2,ASL,ATAD2B,ATAT1,ATG2A,ATP10A,ATP11A,ATP13A3,ATP1A1,ATP6V1A,ATP7A,ATP7B,ATR,AXIN2,BAZ2A,BAZ2B,BCL9,BCOR,BIRC6,BOC,BRCA2,BTBD3,BTBD8,C2CD2,C2o…	576
Cell-To-Cell Signaling and Interaction	Binding of epithelial cells	4.39E-07	6.35754	4.54451e-07	6.34251	1.05	AFDN,AMOT,ARHGAP19,CCN3,CLU,DAB2,EP300,FOXM1,GAB2,HGF,HSPG2,IGF2R,IGFBP5,IL6,ITGA2,ITGA6,ITGB4,LAMC1,LAMC3,NOTCH1,OFD1,PLXNB1,ROCK2,SLK,TGFBR3	25
Cell-To-Cell Signaling and Interaction,Hematological System Development and Function,Immune Cell Trafficking,Inflammatory Response	Activation of leukocytes	9.89E-12	11.0048	1.81801e-11	10.7404	1.041	ACE,ADGRF5,ADRA2A,AHR,ANO6,APP,ATP1A1,BCL2L11,CBL,CCL23,CCL5,CCR7,CD74,CD93,CHRNA7,CLEC11A,CLU,CSF2RB,CX3CL1,CYSLTR1,DOCK8,DPP4,DYSF,EBF1,EFNB2,ETS1,FAM76B,FBXO38,FOXD1,FOXO1,FOXP1,GPER1,HBP1,HDAC6,HDAC9,HGF,HLA-DPB1,HLA-DRB1,HPS1,HSPA1A,IFIH1,IGF2R,IL18R1,IL24,IL6,IL7,INPP5D,IRAK3,IRF6,ITGA1,ITPKB,JPH4,KIT,KMT2C,KMT2E,LAT,LTBP1,LYST,MERTK,MICB,MT-CO1,MT-ND6,MTOR,NLRC5,NOTCH1,NR3C2,NR5A2,OSTM1,PB…	110
Cancer,Organismal Injury and Abnormalities	Incidence of tumor	7.77E-121	120.11	4.08947e-119	118.388	1.034	AASS,ABCA3,ABCA6,ABCB7,ABCC1,ABCG2,ABI1,ABR,ACBD4,ACBD5,ACE,ACER2,ACKR3,ACVR2A,ADAMTS10,ADAMTS9,ADAR,ADARB1,ADCK1,ADCY9,ADGRA2,ADGRF5,ADK,ADORA3,ADRA1D,ADRA2A,ADSS1,AFAP1L1,AFDN,AFF1,AGTPBP1,AHCTF1,AHCYL2,AHNAK2,AHR,AKAP13,AKAP9,ALDH2,AMIGO3,AMOT,ANKHD1-EIF4EBP3,ANKRD20A4P (includes others),ANKRD23,ANKRD24,ANKRD28,ANKRD36,ANKRD65,ANKS1A,ANO6,APAF1,APBA1,APCDD1,APOD,APOLD1,APP,AR,ARFGEF1,ARFGEF2,A…	1070
Cancer,Organismal Injury and Abnormalities	Papillary neoplasm	1.02E-10	9.9914	1.72881e-10	9.76225	1.034	ACVR2A,ADGRF5,AFF1,AGTPBP1,ALDH2,AMOT,APOD,AR,BRCA2,C2orf81,CD34,CDK6,CLDN7,CLU,CREBRF,CX3CL1,DAB2,DACH1,DPP4,DROSHA,E2F8,EEF1B2,EFNB2,EP400,EPHA4,ETS1,FGF11,FLRT2,FLT1,FOXM1,FOXO1,GPC5,GPER1,HERC2,HGF,HIP1,HPS3,IGFBP5,INHBB,IRX5,JAK1,JAM3,KDR,KIT,KRT7,MAMLD1,MARVELD2,MAST4,MERTK,MICB,MKI67,MLLT3,MTHFD2,MTOR,NEDD4L,NF1,NFATC1,NOTCH1,NSD1,NUP93,PBX2,PCDH12,PFKFB3,PIK3C2B,PKP4,PPARG,PRAG1,PRKCH,PTP…	97
Cardiovascular Disease,Organismal Injury and Abnormalities	Peripheral vascular disease	3.45E-20	19.4622	9.91379e-20	19.0038	1.031	ABCC1,ABCG2,ABHD17AP4,ACE,ACVR2A,ADAR,ADCY9,ADORA3,ADRA1D,ADRA2A,ALDH2,APP,AR,ATP1A1,ATR,BMPR2,CALCRL,CARF,CBLN1,CCDC80,CCL5,CD109,CDK6,CELF1,CHRNA7,CLU,CMKLR1,CRYBG1,CSF2RB,CSGALNACT1,CX3CL1,CYP1A1,CYSLTR1,DAB2,DACH1,DOCK6,DOCK8,DOCK9,EEF1B2,EFHC1,EFR3A,ELAPOR2,ENDOV,EPB41L4B,EPS15,F8,FBXO25,FGF11,FILIP1,FLT1,FMNL2,FOLH1,FOXN3,GABRP,GALNT18,GUCY1A1,HDAC9,HGF,HLA-DRB1,HSPA1A,IGFBP5,IL6,IQSEC1,IRA…	161
Cancer,Gastrointestinal Disease,Organismal Injury and Abnormalities	Tumorigenesis of gastrointestinal tumor	2.49E-81	80.6038	2.44118e-80	79.6124	1.026	AASS,ABCA3,ABCA6,ABCB7,ABCC1,ACBD5,ACKR3,ACVR2A,ADAMTS9,ADAR,ADARB1,ADCY9,ADGRA2,ADGRF5,ADK,ADORA3,ADSS1,AFAP1L1,AFDN,AFF1,AHCTF1,AHCYL2,AHNAK2,AKAP13,AKAP9,ALDH2,AMIGO3,AMOT,ANKHD1-EIF4EBP3,ANKRD20A4P (includes others),ANKRD23,ANKRD24,ANKRD28,ANKRD36,ANKS1A,APAF1,APBA1,APCDD1,APOD,AR,ARFGEF1,ARFGEF3,ARHGAP27,ARHGEF28,ARHGEF6,ARID2,ARID4A,ARL10,ARSL,ASAP2,ATAD2B,ATAT1,ATE1,ATG2A,ATOSA,ATP10A,ATP1…	704
Cancer,Organismal Injury and Abnormalities,Respiratory Disease	Respiratory system tumor	9.00E-64	63.0458	5.73248e-63	62.2417	1.007	AASS,ABCA6,ABCB7,ABCC1,ABCG2,ABR,ACE,ACKR3,ACVR2A,ADAR,ADARB1,ADCY9,ADGRF5,ADORA3,ADRA1D,ADSS1,AFDN,AFF1,AGTPBP1,AHCTF1,AHNAK2,AHR,AKAP13,AKAP9,AMOT,ANKHD1-EIF4EBP3,ANKRD20A4P (includes others),ANKRD24,ANKRD28,ANKRD33,ANKRD36,ANKS1A,ANO6,APAF1,APBA1,APOD,AR,ARFGEF1,ARFGEF2,ARFGEF3,ARHGAP28,ARHGEF12,ARHGEF28,ARHGEF6,ARID2,ARRB1,ARSG,ASAP2,ATE1,ATG2A,ATP10A,ATP11A,ATP1A1,ATP7A,ATP7B,ATP9A,ATR,AXIN2…	719
Cancer,Dermatological Diseases and Conditions,Organismal Injury and Abnormalities	Skin carcinoma	1.39E-34	33.857	5.40856e-34	33.2669	1	AASS,ABCC1,ACE,ADAMTS10,ADARB1,ADCY9,ADGRA2,ADGRF5,AFDN,AFF1,AGTPBP1,AHNAK2,AHR,AKAP9,ALDH2,ANKHD1-EIF4EBP3,ANKRD33,ANKRD36,ANO6,APAF1,APBA1,AR,ARFGEF2,ARFGEF3,ARHGAP28,ARHGEF12,ARHGEF28,ARHGEF6,ARSG,ATP10A,ATP11A,ATP2B4,ATP7A,ATP7B,ATR,AXIN2,BAZ2A,BCOR,BEND4,BIRC6,BMPR2,BRCA2,C2orf81,CAMKK2,CAPS2,CAST,CBL,CCDC144A,CCDC80,CCNB1IP1,CCR7,CD109,CDK19,CDK6,CEACAM21,CECR2,CEP192,CHD4,CHD6,CHD7,CHM,CHN…	409
Developmental Disorder,Neurological Disease,Organismal Injury and Abnormalities	Neurodevelopmental disorder	2.83E-19	18.5482	7.97183e-19	18.0984	1	ADARB1,ADCY9,AGTPBP1,ARFGEF1,ARFGEF3,ARID2,ASL,ATP6V1A,ATP9A,AXIN2,BAZ2B,BCAS3,CASK,CBL,CC2D2A,CDK19,CDKL5,CELF2,CHD7,CLCN3,CLIC2,CNOT3,CRACD,CSDE1,DCC,DDX39B,DENND5A,DMXL2,DYNC2H1,EDNRB,EFNB2,EP300,EP400,EZH2,FBXW11,FOXP1,GHR,GMPPA,HECW2,HEPH,HERC1,HIP1,HTR1B,HTR1D,IFT172,IRAK3,ITSN2,JARID2,JMJD1C,KATNAL2,KDM2B,KDM3B,KDR,KIT,KMT2A,KMT2C,KMT2E,LAMC3,LDLRAD4,LRBA,MACF1,MAST3,MBOAT7,MED23,MTOR,MYO1…	126
Gastrointestinal Disease,Inflammatory Disease,Organismal Injury and Abnormalities	Inflammatory bowel disease	1.25E-09	8.90309	1.84638e-09	8.73368	1	ACVR2A,ADORA3,AHR,ANKRD23,APCDD1,APOD,BCL2L11,BRME1,BTBD8,CALCRL,CCDC80,CCL5,CD177,CD74,CFB,CIT,CLU,COL7A1,CPEB4,CSF2RB,DERL3,DOCK8,EBF1,EHMT2,EP300,ETS1,EZH2,FCHSD2,FMO5,FOXP1,FRRS1,GABRP,GATA2,GHR,GPER1,GTF2I,HDAC9,HERC2,IFIH1,IGFBP5,IL18R1,IL24,IL6,IL7,IRF6,JAK1,KCNN3,KIAA0040,KIT,KMT2A,KMT2C,MAGI1,MERTK,MICB,MT-ND6,MTHFD2,MTOR,NAPEPLD,NFATC1,NID1,NLRC5,NOTCH1,NPR3,NR5A2,PDE4C,PDE7B,PEAK1,PER3…	107
Cardiovascular Disease,Organismal Injury and Abnormalities	Primary hypertension	3.61E-09	8.44249	4.99308e-09	8.30163	1	ABCG2,ACE,ADRA1D,ADRA2A,AR,ATP13A3,ATP1A1,BMPR2,CCDC80,CCL5,CPEB4,EDNRB,EPAS1,FOXO1,GTF2I,GUCY1A1,JPH2,KCNJ5,KCNQ1,KDR,LTBP1,NEDD4L,NPR1,NPR3,NR3C2,PDE11A,PDE9A,PFKFB3,PLEKHG1,PPARG,PTGDR2,PURG,RGS5,SBF2,SCNN1B,SCNN1G,SH2B3,SMAD1,SMAD4	39
Cell Death and Survival	Cell death of progenitor cells	6.53E-07	6.18509	6.53654e-07	6.18465	0.998	ADAR,APAF1,BCL2L11,BIRC6,CBL,CCL5,CDK6,CHRNA7,CUL9,EPAS1,EPHA4,ETS1,EZH2,FLI1,FOXP1,GATA2,IFIH1,IL6,IL7,KIFAP3,KLF13,KMT2A,MAP2K6,MCF2L,MECOM,MT2A,MTOR,NOTCH1,PIK3CG,PLCG1,PRKDC,PTPN11,REL,SATB1,SHC1,SMAD4,SPHK1,TSC22D3,VAV3	39
Cell Death and Survival,Organismal Injury and Abnormalities	Necrosis of epithelial tissue	2.19E-11	10.6596	3.92473e-11	10.4062	0.984	ABCC1,ABCG2,ACE,ADAR,AHR,ALDH2,APAF1,APP,AR,ATF7,ATP7B,BCL2L11,BMPR2,CBL,CD74,CDK6,CDON,CIT,CLU,CYSLTR1,DAB2,DAXX,DCC,E2F8,EFNB2,EP400,EPAS1,ERN1,ETS1,FLT1,FOXO1,HDAC6,HGF,IER3,IFIH1,IGFBP5,IL24,IL6,IQGAP2,IRAK3,ITGA2,ITGA6,ITGB4,ITPR3,KDR,KLF8,LAMA4,LEF1,MAML1,MAP2K6,MAP3K1,MAPKAPK3,MECOM,MED12,MERTK,MOAP1,MRPL23,MTOR,NOTCH1,NPR3,OAS2,OAS3,OFD1,PFKFB3,PIK3CG,PLCB1,POMC,PPARG,PRKAA2,PRKCQ,PRKDC,P…	102
Cardiovascular Disease,Organismal Injury and Abnormalities	Arterial lesion	2.75E-08	7.56067	3.35775e-08	7.47395	0.983	ABCA3,ABCA6,ACE,ADAMTS10,ADGRF5,AHR,AKAP13,APP,AR,C1QL3,CAST,CCL5,CCR7,CDK6,CX3CL1,FLT1,FOXO1,GALNT15,GUCY1A1,HERC1,HRCT1,HSPG2,IER3,IL6,JMJD1C,KDR,LPL,MCF2L,MRTFB,NCOA3,NOTCH1,NPR3,NR3C2,PIK3C2A,PIK3CG,PKP4,PLCG1,PLEKHJ1,PPARG,PREX1,PRKCH,PRKCQ,PRKD2,PRKDC,RORA,SHC1,SLC30A3,SMAD4,STAT1,STING1,TGFBR2,TGFBR3,TGFBRAP1,TNFSF4,VCAN,VIP,VWF,WWTR1,ZNF827	59
Cancer,Organismal Injury and Abnormalities	Development of carcinoma	2.59E-114	113.587	7.22222e-113	112.141	0.976	AASS,ABCA3,ABCA6,ABCB7,ABCC1,ABCG2,ABI1,ABR,ACBD4,ACBD5,ACE,ACER2,ACKR3,ACVR2A,ADAMTS10,ADAMTS9,ADAR,ADARB1,ADCK1,ADCY9,ADGRA2,ADGRF5,ADK,ADORA3,ADRA1D,ADSS1,AFAP1L1,AFDN,AFF1,AGTPBP1,AHCTF1,AHCYL2,AHNAK2,AHR,AKAP13,AKAP9,ALDH2,AMIGO3,AMOT,ANKHD1-EIF4EBP3,ANKRD20A4P (includes others),ANKRD23,ANKRD24,ANKRD28,ANKRD36,ANKRD65,ANKS1A,ANO6,APAF1,APBA1,APCDD1,APOD,APP,AR,ARFGEF1,ARFGEF2,ARFGEF3,ARHGAP1…	1029
Cell Death and Survival,Organismal Injury and Abnormalities	Cell death of hematopoietic cells	8.87E-08	7.05208	1.02662e-07	6.98859	0.964	ADAR,APAF1,ATF7,BCL2L11,BIRC6,CBL,CCL5,CDK6,CUL9,EPAS1,EPHA4,ETS1,EZH2,FLI1,FOXP1,GATA2,IFIH1,IL6,IL7,INPP5D,KIFAP3,KLF13,MAP2K6,MCF2L,MECOM,MT2A,MTOR,NOTCH1,PIK3CG,PLCG1,PRKDC,PTPN11,REL,SATB1,SHC1,SMAD4,SPHK1,TSC22D3,VAV3	39
Inflammatory Disease,Inflammatory Response,Organismal Injury and Abnormalities,Respiratory Disease	Asthma	1.83E-08	7.73755	2.28464e-08	7.64118	0.943	ABCC1,ADAMTS9,ADCY9,ADORA3,ADRA1D,ADRA2A,ALDH2,BCL2L11,CCL5,CHD4,CHRNA7,CLCN3,CLEC16A,CMKLR1,CYSLTR1,DPP4,DYNC2H1,ERMP1,EZH2,FBXL7,FMNL2,FOXP1,GALNT18,GPANK1,HERC2,HIVEP1,HLA-DPB1,HLA-DRB1,IL18R1,IL6,IRAG1,IRAK3,ITGA8,ITPKB,ITPR3,ITSN2,JMJD1C,KIT,KRT7,LIFR,MAGI1,MECOM,MICB,MKI67,MT-CO1,NEDD4L,NSD1,OAS2,OFD1,PBX2,PDE11A,PDE4C,PDE7B,PELI2,PREX1,PRKCH,PRKCQ,PTGDR2,RAPGEF6,RERE,RORA,SCAF8,SFN,SH3D19,…	80
Cell Death and Survival,Organismal Injury and Abnormalities	Cell death of hematopoietic progenitor cells	2.86E-07	6.54363	3.0621e-07	6.51398	0.943	ADAR,APAF1,BCL2L11,BIRC6,CBL,CCL5,CDK6,CUL9,EPAS1,EPHA4,ETS1,EZH2,FLI1,FOXP1,GATA2,IFIH1,IL6,IL7,KIFAP3,KLF13,MAP2K6,MCF2L,MECOM,MT2A,MTOR,NOTCH1,PIK3CG,PLCG1,PRKDC,PTPN11,REL,SATB1,SHC1,SMAD4,SPHK1,TSC22D3,VAV3	37
Cancer,Organismal Injury and Abnormalities	Tumorigenesis of tissue	1.69E-121	120.772	9.94118e-120	119.003	0.939	AASS,ABCA3,ABCA6,ABCB7,ABCC1,ABCG2,ABI1,ABR,ACACA,ACBD4,ACBD5,ACE,ACER2,ACKR3,ACVR2A,ADAMTS10,ADAMTS9,ADAR,ADARB1,ADCK1,ADCY9,ADGRA2,ADGRF5,ADK,ADORA3,ADRA1D,ADRA2A,ADSS1,AFAP1L1,AFDN,AFF1,AGTPBP1,AHCTF1,AHCYL2,AHNAK2,AHR,AKAP13,AKAP9,AKR1E2,ALDH2,AMIGO3,AMOT,ANKHD1-EIF4EBP3,ANKRD20A4P (includes others),ANKRD23,ANKRD24,ANKRD28,ANKRD33,ANKRD36,ANKRD65,ANKS1A,ANO6,APAF1,APBA1,APCDD1,APOD,APOLD1,APP…	1198
Embryonic Development,Hair and Skin Development and Function,Organ Development,Organismal Development,Tissue Development	Formation of skin	4.08E-08	7.38934	4.89796e-08	7.30998	0.933	APCDD1,ARHGAP19,ARRDC3,ATP7A,BCL2L11,BMX,CD109,COL7A1,EDA,EZH2,FLNB,FOXM1,FRAS1,FST,HBP1,HGF,HLA-DRB1,IFT172,IGFBP5,IL24,IL6,IL7,INHBB,IRF6,ITGA1,ITGA2,ITGA6,ITGB4,KDR,KIT,LAMC1,LEF1,LPIN1,NCOA3,NFIB,NOTCH1,PPARG,PPL,PRDM1,PRKCH,PTPN11,RIPK4,RNF144B,ROCK2,SATB1,SETX,SFN,SMAD4,SPHK1,STS,SUV39H2,TEK,TFAP2A,TP53BP1,TRIM16,TRPS1,VCAN	57
Cancer,Neurological Disease,Organismal Injury and Abnormalities	Glioma cancer	3.89E-104	103.41	6.1746e-103	102.209	0.926	AASS,ABCA3,ABCA6,ABCB7,ABCC1,ABCG2,ABR,ACACA,ACBD5,ACE,ACKR3,ACVR2A,ADAMTS10,ADAMTS9,ADAR,ADARB1,ADCK1,ADGRA2,ADGRF5,ADRA1D,ADSS1,AFAP1L1,AFDN,AFF1,AGTPBP1,AHCTF1,AHNAK2,AHR,AKAP13,AKAP9,AKR1E2,ALDH2,AMIGO3,AMOT,ANKHD1-EIF4EBP3,ANKRD20A4P (includes others),ANKRD23,ANKRD24,ANKRD28,ANKRD36,ANKRD65,ANKS1A,ANO6,APAF1,APBA1,APCDD1,APP,AR,ARFGEF1,ARFGEF2,ARFGEF3,ARHGAP28,ARHGEF28,ARHGEF6,ARID2,ARID4A,A…	894
Cancer,Neurological Disease,Organismal Injury and Abnormalities	High grade astrocytoma	1.38E-82	81.8601	1.40816e-81	80.8513	0.926	AASS,ABCA3,ABCA6,ABCB7,ABCC1,ABCG2,ABR,ACACA,ACE,ACKR3,ACVR2A,ADAMTS10,ADAMTS9,ADAR,ADARB1,ADCK1,ADGRA2,ADRA1D,ADSS1,AFAP1L1,AFDN,AGTPBP1,AHCTF1,AHNAK2,AHR,AKAP13,AKAP9,ALDH2,AMIGO3,AMOT,ANKHD1-EIF4EBP3,ANKRD20A4P (includes others),ANKRD23,ANKRD24,ANKRD36,ANO6,APAF1,APBA1,APCDD1,APP,AR,ARFGEF1,ARFGEF2,ARFGEF3,ARHGAP28,ARHGEF28,ARHGEF6,ARID2,ARID4A,ARRB1,ARRDC3,ARSG,ARSL,ASAP1,ATAD2B,ATE1,ATG2A,AT…	763
Cell-mediated Immune Response,Cellular Movement,Hematological System Development and Function,Immune Cell Trafficking	T cell migration	1.70E-07	6.76955	1.89099e-07	6.72331	0.899	ABCC1,ACKR3,ADAR,APOD,APP,AR,BCL9,BMPR2,CCL23,CCL5,CCR7,CD74,CMKLR1,CX3CL1,CYSLTR1,DOCK8,DPP4,FOXO1,FOXP1,GATA2,HGF,IL6,IL7,INPP5D,ITGA1,ITGA6,JAK1,KMT2C,LAMA4,LAT,LCP1,MERTK,MTOR,NOTCH1,PIK3CG,PIK3R2,PLCG1,PRKCQ,PRKN,PTGDR2,PTPRB,RGS5,RORA,SATB1,SETD2,STAT1,STING1,TGFBR2,TNFSF4,TNFSF9,TRPV1,VIP	52
Cancer,Neurological Disease,Organismal Injury and Abnormalities	Development of primitive neuroectodermal tumor	9.72E-14	13.0123	2.07234e-13	12.6835	0.896	ABCC1,ANKHD1-EIF4EBP3,AR,ARHGAP27,ASAP2,BCOR,BRCA2,CCNB1IP1,CDK6,CEP295,CGNL1,CLU,CRIM1,CSF2RB,DLGAP4,DOCK8,DROSHA,EP300,EPB41L4A,EXOC6B,EZH2,FOLH1,FOXM1,FSIP2,HES4,HLA-DRB1,IDE,IFT172,IL24,KALRN,KMT2A,KMT2C,LAMP3,LENG8,LHX6,LRBA,MDC1,MED23,MERTK,MGA,MMEL1,MRPS18B,MTCL1,NCSTN,NF1,NIPBL,NOTCH1,OAZ1,PCDHGA11,PCDHGB1,PCDHGB6,PCDHGB7,PHC1,PLPP3,PRR14L,PTPN11,RALGAPA2,RGS12,RGS5,RP1L1,SHE,STAT2,STK10,…	72
Neurological Disease,Organismal Injury and Abnormalities	Epilepsy	5.42E-08	7.266	6.4218e-08	7.19234	0.896	ABCC1,ADCY9,ADRA1D,ADRA2A,ALDH2,APP,ARRDC3,ATP6V1A,ATR,BCL2L11,BTBD8,CALCRL,CASK,CBL,CDK19,CDKL5,CELF2,CLU,CRAMP1,DENND5A,DMXL2,EFHC1,EP300,EPM2A,FOXP1,GABRP,GOLGA8K (includes others),HBP1,HDAC9,HECW2,HSPA1A,HTR1B,HTR1D,ITSN2,JMJD1C,KALRN,KCNIP1,KMT2C,MACF1,MAST3,MAST4,MED23,MTOR,NCDN,NEDD4L,NF1,NFIA,NOVA2,NR3C2,NRP2,NSF,PCDH19,PLCB1,PTPN11,PTPRM,REPS2,RHOBTB2,RORA,SASH1,SCN3B,SCN4A,SETD2,SLC12A5…	72
Dermatological Diseases and Conditions,Organismal Injury and Abnormalities	Abnormality of skin morphology	9.40E-11	10.0269	1.6041e-10	9.79477	0.893	ABCC1,ADAR,AHNAK2,AHR,ANKS1A,ATP11A,BRCA2,CAST,CCDC144A,CCL5,CCN3,CD34,CD74,CFB,CHN1,CIB1,COL7A1,CRIM1,CSF2RB,DGKA,EDNRB,EIF6,EML4,EPHA4,FLI1,FLNB,FLT1,FOXP1,FRAS1,FST,HERC2,HGF,HLA-C,HLA-DPB1,HLA-DRB1,HNRNPH1,HPS1,HPS3,HPS5,IDE,IFIH1,IL6,IQGAP1,ITGA6,ITGB4,JAK1,KDR,KIAA0040,KIT,LAMC1,LAT,LCP1,LPL,MACF1,MAML1,MAP2K6,MAPKAPK3,MBNL2,MTOR,NCSTN,NFATC1,NT5M,NUAK1,OASL,PDE11A,PDE6B,PLPP3,PLXNB1,PLXND1…	105
Cancer,Organismal Injury and Abnormalities	Pelvic tumor	6.55E-101	100.184	8.61842e-100	99.0646	0.891	AASS,ABCA3,ABCA6,ABCB7,ABCC1,ABCG2,ABI1,ABR,ACBD5,ACE,ACER2,ACVR2A,ADAMTS10,ADAMTS9,ADAR,ADARB1,ADCK1,ADCY9,ADGRA2,ADGRF5,ADK,ADORA3,ADRA1D,ADRA2A,ADSS1,AFDN,AFF1,AGTPBP1,AHCTF1,AHCYL2,AHNAK2,AHR,AKAP13,AKAP9,AKR1E2,ALDH2,AMOT,ANKHD1-EIF4EBP3,ANKRD20A4P (includes others),ANKRD23,ANKRD24,ANKRD28,ANKRD33,ANKRD36,ANKS1A,ANO6,APAF1,APBA1,APCDD1,APOD,APOLD1,APP,AR,ARFGEF1,ARFGEF2,ARFGEF3,ARHGAP19,ARHG…	997
Cancer,Organismal Injury and Abnormalities	Upper abdominal cancer	1.31E-86	85.8827	1.50575e-85	84.8222	0.878	AASS,ABCA3,ABCA6,ABCC1,ABCG2,ABR,ACACA,ACBD4,ACBD5,ACE,ACKR3,ACVR2A,ADAMTS10,ADAMTS9,ADAR,ADARB1,ADCK1,ADCY9,ADGRA2,ADGRF5,ADK,ADORA3,ADRA1D,ADRA2A,ADSS1,AFAP1L1,AFDN,AFF1,AGTPBP1,AHCTF1,AHCYL2,AHNAK2,AHR,AKAP13,AKAP9,ALDH2,AMOT,ANKHD1-EIF4EBP3,ANKRD20A4P (includes others),ANKRD23,ANKRD24,ANKRD28,ANKRD36,ANKRD65,ANKS1A,ANO6,APAF1,APBA1,APOD,APP,AR,ARFGEF1,ARFGEF2,ARFGEF3,ARHGAP19,ARHGAP27,ARHGAP2…	933
Cancer,Gastrointestinal Disease,Organismal Injury and Abnormalities	Gastrointestinal tumor	2.43E-117	116.614	8.67857e-116	115.062	0.877	AASS,ABCA3,ABCA6,ABCB7,ABCC1,ABCG2,ABR,ACACA,ACBD4,ACBD5,ACE,ACKR3,ACVR2A,ADAMTS10,ADAMTS9,ADAR,ADARB1,ADCK1,ADCY9,ADGRA2,ADGRF5,ADK,ADORA3,ADRA1D,ADRA2A,ADSS1,AFAP1L1,AFDN,AFF1,AGTPBP1,AHCTF1,AHCYL2,AHNAK2,AHR,AKAP13,AKAP9,ALDH2,AMIGO3,AMOT,ANKHD1-EIF4EBP3,ANKRD20A4P (includes others),ANKRD23,ANKRD24,ANKRD28,ANKRD36,ANKRD65,ANKS1A,ANO6,APAF1,APBA1,APCDD1,APOD,APOLD1,APP,AR,ARFGEF1,ARFGEF2,ARFGEF…	1092
Cancer,Organismal Injury and Abnormalities	Generation of tumor	1.26E-125	124.9	1.575e-123	122.803	0.868	AASS,ABCA3,ABCA6,ABCB7,ABCC1,ABCG2,ABI1,ABR,ACACA,ACBD4,ACBD5,ACE,ACER2,ACKR3,ACVR2A,ADAMTS10,ADAMTS9,ADAR,ADARB1,ADCK1,ADCY9,ADGRA2,ADGRF5,ADK,ADORA3,ADRA1D,ADSS1,AFAP1L1,AFDN,AFF1,AGTPBP1,AHCTF1,AHCYL2,AHNAK2,AHR,AKAP13,AKAP9,AKR1E2,ALDH2,AMIGO3,AMOT,ANKHD1-EIF4EBP3,ANKRD20A4P (includes others),ANKRD23,ANKRD24,ANKRD28,ANKRD36,ANKRD65,ANKS1A,ANO6,APAF1,APBA1,APCDD1,APOD,APP,AR,ARFGEF1,ARFGEF2,AR…	1120
Cardiovascular Disease,Organismal Injury and Abnormalities	Aortic dilatation	2.10E-07	6.67778	2.29508e-07	6.6392	0.863	ABCA3,ABCA6,ADAMTS10,ALDH2,AR,CAST,CCR7,CDK6,CX3CL1,EFNB2,FOXO1,GALNT15,GUCY1A1,HERC1,HRCT1,IER3,IL6,JMJD1C,KDR,LPL,MCF2L,MRTFB,NOTCH1,PIK3C2A,PKP4,PLEKHJ1,PPARG,PREX1,PRKCQ,PRKD2,PRKDC,RORA,SMAD4,TGFBR2,TGFBR3,TGFBRAP1,VCAN,VWF,WWTR1,ZNF827	40
Cellular Movement,Hematological System Development and Function,Immune Cell Trafficking	Cellular infiltration by mononuclear leukocytes	1.05E-07	6.97881	1.2e-07	6.92082	0.861	ADAR,APOD,APP,AR,BCL9,CCL5,CCR7,CMKLR1,CSF2RB,DPP4,FLT1,GATA2,IL6,IRAK3,IRF6,ITGA1,JAK1,KMT2C,LAMA4,MERTK,NFATC1,NOTCH1,PIK3CG,PIK3R2,PLD1,PPARG,PRKCQ,PRKN,PSMB8,PTGDR2,RGS5,RORA,RPTOR,SATB1,SETD2,STAT1,STING1,TGFBR2,TNFRSF12A,TNFSF4,TNFSF9,TRPV1,VAV3,VIP,WWP2	45
Cancer,Organismal Injury and Abnormalities	Thoracic carcinoma	9.44E-56	55.025	5.21547e-55	54.2827	0.858	AASS,ABCA6,ABCB7,ABCC1,ABCG2,ABR,ACE,ACVR2A,ADAR,ADARB1,ADCY9,ADGRF5,ADORA3,ADRA1D,ADSS1,AFDN,AGTPBP1,AHCTF1,AHNAK2,AHR,AKAP13,AKAP9,AMOT,ANKHD1-EIF4EBP3,ANKRD20A4P (includes others),ANKRD24,ANKRD28,ANKRD33,ANKRD36,ANKS1A,ANO6,APAF1,APBA1,APOD,AR,ARFGEF1,ARFGEF2,ARHGAP28,ARHGEF12,ARHGEF28,ARHGEF6,ARID2,ARRB1,ARSG,ATE1,ATG2A,ATP10A,ATP11A,ATP1A1,ATP7A,ATP7B,ATP9A,ATR,AXIN2,BACE2,BAZ2A,BCAS3,BCL2L1…	658
Cancer,Organismal Injury and Abnormalities,Respiratory Disease	Lung carcinoma	9.90E-56	55.0044	5.43956e-55	54.2644	0.858	AASS,ABCA6,ABCB7,ABCC1,ABCG2,ABR,ACE,ACVR2A,ADAR,ADARB1,ADCY9,ADGRF5,ADORA3,ADRA1D,ADSS1,AFDN,AGTPBP1,AHCTF1,AHNAK2,AHR,AKAP13,AKAP9,AMOT,ANKHD1-EIF4EBP3,ANKRD20A4P (includes others),ANKRD24,ANKRD28,ANKRD33,ANKRD36,ANKS1A,ANO6,APAF1,APBA1,APOD,AR,ARFGEF1,ARFGEF2,ARHGAP28,ARHGEF12,ARHGEF28,ARHGEF6,ARID2,ARRB1,ARSG,ATE1,ATG2A,ATP10A,ATP11A,ATP1A1,ATP7A,ATP7B,ATP9A,ATR,AXIN2,BACE2,BAZ2A,BCAS3,BCL2L1…	657
Cancer,Gastrointestinal Disease,Organismal Injury and Abnormalities	Large intestine carcinoma	6.02E-126	125.22	8.6e-124	123.066	0.849	AASS,ABCA3,ABCA6,ABCB7,ABCC1,ABCG2,ABR,ACBD5,ACE,ACKR3,ACVR2A,ADAMTS10,ADAMTS9,ADAR,ADARB1,ADCK1,ADCY9,ADGRA2,ADGRF5,ADK,ADORA3,ADRA1D,ADRA2A,ADSS1,AFAP1L1,AFDN,AFF1,AGTPBP1,AHCTF1,AHCYL2,AHNAK2,AHR,AKAP13,AKAP9,ALDH2,AMIGO3,AMOT,ANKHD1-EIF4EBP3,ANKRD20A4P (includes others),ANKRD23,ANKRD24,ANKRD28,ANKRD36,ANKRD65,ANKS1A,ANO6,APAF1,APBA1,APCDD1,APOD,APOLD1,APP,AR,ARFGEF1,ARFGEF2,ARFGEF3,ARHGAP19,A…	1026
Cancer,Organismal Injury and Abnormalities	Pelvic carcinoma	2.19E-101	100.66	2.95946e-100	99.5288	0.849	AASS,ABCA3,ABCA6,ABCB7,ABCC1,ABCG2,ABI1,ABR,ACBD5,ACE,ACER2,ACVR2A,ADAMTS10,ADAMTS9,ADAR,ADARB1,ADCK1,ADCY9,ADGRA2,ADGRF5,ADORA3,ADSS1,AFDN,AFF1,AGTPBP1,AHCTF1,AHCYL2,AHNAK2,AHR,AKAP13,AKAP9,AKR1E2,ALDH2,AMOT,ANKHD1-EIF4EBP3,ANKRD20A4P (includes others),ANKRD23,ANKRD24,ANKRD28,ANKRD33,ANKRD36,ANKS1A,ANO6,APAF1,APBA1,APCDD1,APOD,APOLD1,APP,AR,ARFGEF1,ARFGEF2,ARFGEF3,ARHGAP19,ARHGAP27,ARHGAP28,ARHG…	958
Cancer,Organismal Injury and Abnormalities,Reproductive System Disease	Genital carcinoma	2.32E-99	98.6345	2.93671e-98	97.5321	0.849	AASS,ABCA3,ABCA6,ABCB7,ABCC1,ABCG2,ABI1,ABR,ACE,ACER2,ACVR2A,ADAMTS10,ADAMTS9,ADAR,ADCK1,ADCY9,ADGRA2,ADGRF5,ADORA3,ADSS1,AFDN,AFF1,AGTPBP1,AHCTF1,AHCYL2,AHNAK2,AHR,AKAP13,AKAP9,ALDH2,AMOT,ANKHD1-EIF4EBP3,ANKRD20A4P (includes others),ANKRD23,ANKRD24,ANKRD28,ANKRD36,ANKS1A,ANO6,APBA1,APCDD1,APOD,APOLD1,APP,AR,ARFGEF1,ARFGEF2,ARFGEF3,ARHGAP19,ARHGAP27,ARHGAP28,ARHGEF12,ARHGEF28,ARHGEF6,ARID2,ARID4A…	866
Cancer,Gastrointestinal Disease,Organismal Injury and Abnormalities	Colorectal carcinoma	5.92E-81	80.2277	5.53271e-80	79.2571	0.849	AASS,ABCA3,ABCA6,ABCB7,ABCC1,ACBD5,ACKR3,ACVR2A,ADAMTS9,ADAR,ADARB1,ADCY9,ADGRA2,ADGRF5,ADK,ADORA3,ADSS1,AFAP1L1,AFDN,AFF1,AHCTF1,AHCYL2,AHNAK2,AKAP13,AKAP9,ALDH2,AMIGO3,AMOT,ANKHD1-EIF4EBP3,ANKRD20A4P (includes others),ANKRD23,ANKRD24,ANKRD28,ANKRD36,ANKS1A,APAF1,APBA1,APCDD1,APOD,AR,ARFGEF1,ARFGEF3,ARHGAP27,ARHGEF28,ARHGEF6,ARID2,ARID4A,ARL10,ARSL,ASAP2,ATAD2B,ATAT1,ATE1,ATG2A,ATOSA,ATP10A,ATP1…	701
Cancer,Gastrointestinal Disease,Organismal Injury and Abnormalities	Colon carcinoma	8.14E-78	77.0894	7.07826e-77	76.1501	0.849	ABCA3,ABCA6,ABCB7,ABCC1,ACKR3,ACVR2A,ADAMTS9,ADAR,ADARB1,ADCY9,ADGRA2,ADGRF5,ADK,ADORA3,ADSS1,AFAP1L1,AFDN,AFF1,AHCTF1,AHCYL2,AHNAK2,AKAP13,AKAP9,ALDH2,AMIGO3,AMOT,ANKHD1-EIF4EBP3,ANKRD20A4P (includes others),ANKRD23,ANKRD24,ANKRD28,ANKRD36,ANKS1A,APAF1,APBA1,APCDD1,APOD,AR,ARFGEF1,ARFGEF3,ARHGAP27,ARHGEF28,ARHGEF6,ARID2,ARID4A,ARL10,ASAP2,ATAD2B,ATE1,ATG2A,ATOSA,ATP10A,ATP11A,ATP13A3,ATP7A,ATP7B…	666
Connective Tissue Disorders,Inflammatory Disease,Organismal Injury and Abnormalities,Skeletal and Muscular Disorders	Rheumatic disease	6.43E-17	16.1918	1.61965e-16	15.7906	0.849	ADAR,ADRA2A,AHNAK2,AHR,ANKS1A,AR,ARRB1,ASAP1,BMAL1,BRME1,CALCRL,CCL23,CCL5,CCN3,CCR7,CD34,CD74,CDK5RAP2,CDK6,CFB,CHN1,CIB1,CLIC2,CLU,CMKLR1,COL9A3,CSF2RB,CSGALNACT1,CX3CL1,DAXX,DGKA,DPP4,EDNRB,EML4,EPAS1,EPHA4,ETS1,FBXL7,FIP1L1,FLI1,FLNB,FLT1,FOXO1,FOXP1,GABRP,GHR,GPC5,GPER1,GRAMD1A,GTF3C1,HDAC9,HLA-DPB1,HLA-DRB1,HNRNPH1,HSPA1A,IDE,IFIH1,IGFBP5,IL18R1,IL6,IL7,INPP5D,IQGAP1,ITGB4,JAK1,JAM3,JMJD1C,…	166
Cancer,Neurological Disease,Organismal Injury and Abnormalities	Astrocytoma	1.03E-82	81.9872	1.07292e-81	80.9694	0.844	AASS,ABCA3,ABCA6,ABCB7,ABCC1,ABCG2,ABR,ACACA,ACE,ACKR3,ACVR2A,ADAMTS10,ADAMTS9,ADAR,ADARB1,ADCK1,ADCY9,ADGRA2,ADRA1D,ADSS1,AFAP1L1,AFDN,AGTPBP1,AHCTF1,AHNAK2,AHR,AKAP13,AKAP9,ALDH2,AMIGO3,AMOT,ANKHD1-EIF4EBP3,ANKRD20A4P (includes others),ANKRD23,ANKRD24,ANKRD36,ANO6,APAF1,APBA1,APCDD1,APP,AR,ARFGEF1,ARFGEF2,ARFGEF3,ARHGAP28,ARHGEF28,ARHGEF6,ARID2,ARID4A,ARRB1,ARRDC3,ARSG,ARSL,ASAP1,ATAD2B,ATE1,AT…	766
Cancer,Organismal Injury and Abnormalities,Respiratory Disease	Lung tumor	2.69E-57	56.5702	1.5731e-56	55.8032	0.838	AASS,ABCA6,ABCB7,ABCC1,ABCG2,ABR,ACE,ACKR3,ACVR2A,ADAR,ADARB1,ADCY9,ADGRF5,ADORA3,ADRA1D,ADSS1,AFDN,AFF1,AGTPBP1,AHCTF1,AHNAK2,AHR,AKAP13,AKAP9,AMOT,ANKHD1-EIF4EBP3,ANKRD20A4P (includes others),ANKRD24,ANKRD28,ANKRD33,ANKRD36,ANKS1A,ANO6,APAF1,APBA1,APOD,AR,ARFGEF1,ARFGEF2,ARHGAP28,ARHGEF12,ARHGEF28,ARHGEF6,ARID2,ARRB1,ARSG,ATE1,ATG2A,ATP10A,ATP11A,ATP1A1,ATP7A,ATP7B,ATP9A,ATR,AXIN2,BACE2,BAZ2A,B…	681
Cancer,Endocrine System Disorders,Organismal Injury and Abnormalities	Endocrine gland tumor	2.80E-122	121.553	1.86667e-120	119.729	0.835	AASS,ABCA3,ABCA6,ABCB7,ABCC1,ABCG2,ABI1,ABR,ACBD5,ACE,ACER2,ACVR2A,ADAMTS10,ADAMTS9,ADAR,ADARB1,ADCY9,ADGRA2,ADORA3,ADRA1D,ADRA2A,ADSS1,AFAP1L1,AFDN,AFF1,AGTPBP1,AHCTF1,AHCYL2,AHNAK2,AHR,AKAP13,AKAP9,ALDH2,AMIGO3,AMOT,ANKHD1-EIF4EBP3,ANKRD20A4P (includes others),ANKRD23,ANKRD24,ANKRD28,ANKRD33,ANKRD36,ANKRD65,ANKS1A,ANO6,APAF1,APBA1,APCDD1,APOD,APP,AR,ARFGEF1,ARFGEF2,ARFGEF3,ARHGAP19,ARHGAP27,ARH…	1066
Cancer,Gastrointestinal Disease,Hepatic System Disease,Organismal Injury and Abnormalities	Liver carcinoma	2.95E-64	63.5302	1.91558e-63	62.7177	0.823	AASS,ABCA3,ABCA6,ABCC1,ABCG2,ACACA,ACE,ACKR3,ACVR2A,ADAMTS10,ADAMTS9,ADAR,ADARB1,ADCK1,ADK,ADORA3,ADRA1D,ADRA2A,AFAP1L1,AFDN,AFF1,AGTPBP1,AHCTF1,AHNAK2,AHR,AKAP13,AKAP9,ALDH2,AMOT,ANKHD1-EIF4EBP3,ANKRD24,ANKRD36,ANO6,APAF1,APBA1,AR,ARFGEF1,ARFGEF2,ARFGEF3,ARHGAP27,ARHGEF12,ARHGEF28,ARID2,ARID4A,ARRB1,ARSG,ASAP1,ASAP2,ATAT1,ATE1,ATG2A,ATL1,ATP10A,ATP11A,ATP1A1,ATP7A,ATP9A,ATR,AXIN2,BAZ2A,BAZ2B,BCA…	642
Cancer,Organismal Injury and Abnormalities,Respiratory Disease	Non-small cell lung carcinoma	6.79E-35	34.1681	2.66275e-34	33.5747	0.805	ABCB7,ABCG2,ACVR2A,ADAR,ADARB1,ADORA3,ADRA1D,ADSS1,AFDN,AGTPBP1,AHCTF1,AHNAK2,AHR,AKAP13,AKAP9,AMOT,ANKRD20A4P (includes others),ANKRD24,ANKRD28,ANKRD33,ANKS1A,ANO6,APBA1,APOD,AR,ARFGEF1,ARFGEF2,ARHGAP28,ARHGEF12,ARHGEF6,ARID2,ARRB1,ATE1,ATG2A,ATP10A,ATP1A1,ATP7A,ATP7B,ATR,AXIN2,BACE2,BAZ2A,BCAS3,BCL2L11,BCOR,BDH1,BEND4,BICRAL,BIRC6,BMAL2,BMX,BRCA2,CAMKK2,CAND2,CAVIN2,CBL,CBLN1,CCDC150,CCDC180,CC…	447
Cell-To-Cell Signaling and Interaction	Interaction of epithelial cells	2.31E-07	6.63639	2.4973e-07	6.60253	0.803	AFDN,AMOT,ARHGAP19,CCN3,CLU,DAB2,EP300,FOXM1,GAB2,HGF,HSPG2,IGF2R,IGFBP5,IL6,ITGA2,ITGA6,ITGB4,LAMC1,LAMC3,NOTCH1,OFD1,PLXNB1,RASGRF2,ROCK2,SLK,TGFBR3	26
Cancer,Organismal Injury and Abnormalities,Reproductive System Disease	Breast or ovarian carcinoma	9.68E-66	65.0141	6.58503e-65	64.1814	0.799	AASS,ABCA3,ABCA6,ABCG2,ABR,ACBD5,ACE,ACVR2A,ADAMTS10,ADAMTS9,ADCK1,ADCY9,ADGRF5,ADORA3,ADRA1D,ADSS1,AFDN,AGTPBP1,AHCTF1,AHNAK2,AKAP13,AKAP9,ALDH2,AMOT,ANKRD24,ANKRD36,APAF1,APBA1,APCDD1,APOD,AR,ARFGEF1,ARHGAP19,ARHGAP27,ARHGEF12,ARHGEF28,ARID2,ARRB1,ASAP1,ASL,ATAD2B,ATE1,ATF6B,ATG2A,ATP10A,ATP1A1,ATP2B4,ATP7B,ATR,AXIN2,B3GNT5,BCAS3,BCL2L11,BCL9,BCOR,BDH1,BIRC6,BMAL1,BMAL2,BMPR2,BMX,BRCA2,BTBD8,C2…	580
Cell Death and Survival,Organismal Injury and Abnormalities	Cell death of connective tissue cells	1.09E-08	7.96257	1.40283e-08	7.85299	0.799	ABCC1,ABCG2,AFDN,AHR,APAF1,APP,AR,ATP6V1G2,ATR,BCL2L11,BIRC6,BRCA2,CCDC80,CCN3,CDK6,CEP120,CLU,CUL9,DAXX,DDIAS,EFNB2,EIF6,EP300,EP400,ERN1,ETS1,FAT4,FLI1,FLT1,FOXO1,FOXP1,HGF,IER3,IFIH1,IGF2R,IL24,ITGA6,KCNIP1,LEF1,MAML1,MAP3K1,MCF2L,MECOM,MT2A,MTOR,NFATC1,NOTCH1,OAZ1,PIK3CG,PLCG1,PLD1,PPARG,PRKAA2,PRKAR2B,PRKCH,PRKDC,PRKN,PTPN11,RANBP2,REL,REPS2,RPS6KA2,SFRP1,SLK,SPHK1,STAT1,STC1,STX1A,TACC1,TNC…	81
Cancer,Organismal Injury and Abnormalities	Thoracic neoplasm	2.20E-56	55.6576	1.24294e-55	54.9056	0.785	AASS,ABCA6,ABCB7,ABCC1,ABCG2,ABR,ACE,ACKR3,ACVR2A,ADAR,ADARB1,ADCY9,ADGRF5,ADORA3,ADRA1D,ADSS1,AFDN,AFF1,AGTPBP1,AHCTF1,AHNAK2,AHR,AKAP13,AKAP9,AMOT,ANKHD1-EIF4EBP3,ANKRD20A4P (includes others),ANKRD24,ANKRD28,ANKRD33,ANKRD36,ANKS1A,ANO6,APAF1,APBA1,APOD,AR,ARFGEF1,ARFGEF2,ARHGAP28,ARHGEF12,ARHGEF28,ARHGEF6,ARID2,ARRB1,ARSG,ATE1,ATG2A,ATP10A,ATP11A,ATP1A1,ATP7A,ATP7B,ATP9A,ATR,AXIN2,BACE2,BAZ2A,B…	682
Embryonic Development,Organismal Development,Skeletal and Muscular System Development and Function	Limb development	2.56E-11	10.5918	4.54707e-11	10.3423	0.779	ACVR2A,APP,AR,BMAL1,BMPR2,CHD7,CLEC11A,DYNC2H1,EBF1,ETS1,FLT1,FOXO1,FRAS1,FRS2,GATA2,GHR,HAPLN1,HGF,IFIH1,IFT172,INPP5D,IRF6,ITGA2,ITGA6,ITGB4,ITGBL1,KDR,LEF1,MECOM,MERTK,NF1,NFIA,NIPBL,NOTCH1,NPR1,PBX1,PBX2,PHC1,PRDM1,SFRP1,SMAD4,STAT1,STC1,TBC1D32,TEK,TFAP2A,TGFBR2,TSC22D3,TTBK2,ZBTB16	50
Organismal Injury and Abnormalities	Discomfort	2.15E-12	11.6676	4.10305e-12	11.3869	0.762	ACE,ACVR2A,ADORA3,ADRA1D,ADRA2A,ALDH2,AMIGO3,AR,ARHGEF12,ASAP2,ATAD2B,BORCS7-ASMT,CALCRL,CARF,CCL5,CDON,CEP170,CHRNA7,CIT,CLU,CX3CL1,CYSLTR1,DCC,DOP1B,EHMT2,EML6,FLT1,FOXP1,FST,GABRP,GUCY1A1,HTR1B,HTR1D,IL6,INPP5D,INTS3,IQGAP1,IRAG1,ITGA2B,ITPR3,JMJD1C,KCNJ12,KCNJ5,KCNQ1,KDR,KIAA0040,KIT,KSR2,LPL,MACF1,MAML3,MERTK,MLIP,MT-CO1,MT-CO2,NAV2,NEDD4L,NFIB,NPR1,NR3C2,NSD1,NSF,OPRL1,PCDHGA11,PDE11A,PDE4C…	101
Cancer,Organismal Injury and Abnormalities	Abdominal carcinoma	1.21E-130	129.917	2.42e-128	127.616	0.757	AASS,ABCA3,ABCA6,ABCB7,ABCC1,ABCG2,ABI1,ABR,ACACA,ACBD4,ACBD5,ACE,ACER2,ACKR3,ACVR2A,ADAMTS10,ADAMTS9,ADAR,ADARB1,ADCK1,ADCY9,ADGRA2,ADGRF5,ADK,ADORA3,ADRA1D,ADRA2A,ADSS1,AFAP1L1,AFDN,AFF1,AGTPBP1,AHCTF1,AHCYL2,AHNAK2,AHR,AKAP13,AKAP9,AKR1E2,ALDH2,AMIGO3,AMOT,ANKHD1-EIF4EBP3,ANKRD20A4P (includes others),ANKRD23,ANKRD24,ANKRD28,ANKRD33,ANKRD36,ANKRD65,ANKS1A,ANO6,APAF1,APBA1,APCDD1,APOD,APOLD1,APP…	1161
Cancer,Organismal Injury and Abnormalities	Embryonal tumor	5.62E-22	21.2503	1.69789e-21	20.7701	0.757	ABCC1,ABCG2,ACACA,ADARB1,ADRA1D,AHCTF1,AKAP13,ALDH2,ANKHD1-EIF4EBP3,ANO6,AR,ARHGAP27,ARHGEF28,ARID2,ARRB1,ARSL,ASAP2,ATE1,ATP2B4,ATP6V1G2,ATR,AXIN2,BCOR,BMPR2,BRCA2,CAMKK2,CC2D2A,CCDC150,CCDC88C,CCNB1IP1,CCR7,CD93,CDK6,CELF1,CEP295,CGNL1,CHD4,CHD7,CLEC11A,CLU,COL7A1,CRIM1,CSDE1,CSF2RB,DAB2,DACH1,DCC,DLGAP4,DMXL2,DOCK6,DOCK8,DOP1B,DPP4,DROSHA,ECPAS,EP300,EP400,EPB41L4A,EPM2A,EPS15,ETFDH,ETV1,EXOC6…	235
Cancer,Hematological Disease,Immunological Disease,Organismal Injury and Abnormalities	Acute leukemia	4.11E-52	51.3862	2.14062e-51	50.6695	0.745	ABCA6,ABCC1,ABCG2,ACACA,ACBD5,ACE,ACER2,ADAMTS9,ADARB1,ADGRA2,ADGRF5,ADORA3,ADRA1D,ADSS1,AFDN,AFF1,AHCYL2,AHNAK2,AKAP13,AKAP9,ALDH2,AMOT,ANKHD1-EIF4EBP3,ANKRD20A4P (includes others),ANKRD24,ANKRD28,ANKRD33,ANKRD36,ANKS1A,APCDD1,AR,ARFGEF1,ARFGEF3,ARHGAP28,ARHGEF28,ARHGEF6,ARID2,ARID4A,ARSL,ASAP2,ATF6B,ATL1,ATP10A,ATP11A,ATP13A3,ATP2B4,ATP6V1A,ATR,AXIN2,BAZ2B,BCAS3,BCOR,BMAL1,BMAL2,BRCA2,BRME1,BTB…	457
Cancer,Gastrointestinal Disease,Organismal Injury and Abnormalities	Gastrointestinal tract cancer	9.05E-112	111.043	2.20732e-110	109.656	0.743	AASS,ABCA3,ABCA6,ABCB7,ABCC1,ABCG2,ABR,ACACA,ACBD4,ACBD5,ACE,ACKR3,ACVR2A,ADAMTS10,ADAMTS9,ADAR,ADARB1,ADCK1,ADCY9,ADGRA2,ADGRF5,ADK,ADORA3,ADRA1D,ADRA2A,ADSS1,AFAP1L1,AFDN,AFF1,AGTPBP1,AHCTF1,AHCYL2,AHNAK2,AHR,AKAP13,AKAP9,ALDH2,AMIGO3,AMOT,ANKHD1-EIF4EBP3,ANKRD20A4P (includes others),ANKRD23,ANKRD24,ANKRD28,ANKRD36,ANKRD65,ANKS1A,ANO6,APAF1,APBA1,APCDD1,APOD,APOLD1,APP,AR,ARFGEF1,ARFGEF2,ARFGEF…	1080
Cancer,Gastrointestinal Disease,Organismal Injury and Abnormalities	Intestinal tumor	6.13E-119	118.213	2.66522e-117	116.574	0.739	AASS,ABCA3,ABCA6,ABCB7,ABCC1,ABCG2,ABR,ACACA,ACBD5,ACE,ACKR3,ACVR2A,ADAMTS10,ADAMTS9,ADAR,ADARB1,ADCK1,ADCY9,ADGRA2,ADGRF5,ADK,ADORA3,ADRA1D,ADRA2A,ADSS1,AFAP1L1,AFDN,AFF1,AGTPBP1,AHCTF1,AHCYL2,AHNAK2,AHR,AKAP13,AKAP9,ALDH2,AMIGO3,AMOT,ANKHD1-EIF4EBP3,ANKRD20A4P (includes others),ANKRD23,ANKRD24,ANKRD28,ANKRD36,ANKRD65,ANKS1A,ANO6,APAF1,APBA1,APCDD1,APOD,APOLD1,APP,AR,ARFGEF1,ARFGEF2,ARFGEF3,ARHG…	1051
Cellular Development,Cellular Growth and Proliferation,Reproductive System Development and Function	Proliferation of prostate cell lines	2.15E-07	6.66756	2.34205e-07	6.6304	0.736	ACKR3,AR,CLU,DAB2,ETV1,EZH2,IL6,SEC14L2,SFRP1,TGFBR2,VCAN,WWTR1	12
Cancer,Gastrointestinal Disease,Organismal Injury and Abnormalities	Malignant neoplasm of large intestine	1.25E-116	115.903	3.90625e-115	114.408	0.729	AASS,ABCA3,ABCA6,ABCB7,ABCC1,ABCG2,ABR,ACACA,ACBD5,ACE,ACKR3,ACVR2A,ADAMTS10,ADAMTS9,ADAR,ADARB1,ADCK1,ADCY9,ADGRA2,ADGRF5,ADK,ADORA3,ADRA1D,ADRA2A,ADSS1,AFAP1L1,AFDN,AFF1,AGTPBP1,AHCTF1,AHCYL2,AHNAK2,AHR,AKAP13,AKAP9,ALDH2,AMIGO3,AMOT,ANKHD1-EIF4EBP3,ANKRD20A4P (includes others),ANKRD23,ANKRD24,ANKRD28,ANKRD36,ANKRD65,ANKS1A,ANO6,APAF1,APBA1,APCDD1,APOD,APOLD1,APP,AR,ARFGEF1,ARFGEF2,ARFGEF3,ARHG…	1044
Cancer,Gastrointestinal Disease,Organismal Injury and Abnormalities	Colorectal cancer	4.19E-77	76.3778	3.5812e-76	75.446	0.729	AASS,ABCA3,ABCA6,ABCB7,ABCC1,ABCG2,ACACA,ACBD5,ACKR3,ACVR2A,ADAMTS9,ADAR,ADARB1,ADCY9,ADGRA2,ADGRF5,ADK,ADORA3,ADRA1D,ADRA2A,ADSS1,AFAP1L1,AFDN,AFF1,AGTPBP1,AHCTF1,AHCYL2,AHNAK2,AHR,AKAP13,AKAP9,ALDH2,AMIGO3,AMOT,ANKHD1-EIF4EBP3,ANKRD20A4P (includes others),ANKRD23,ANKRD24,ANKRD28,ANKRD36,ANKS1A,APAF1,APBA1,APCDD1,APOD,AR,ARFGEF1,ARFGEF3,ARHGAP27,ARHGEF28,ARHGEF6,ARID2,ARID4A,ARL10,ARSL,ASAP2,ATA…	762
Developmental Disorder,Neurological Disease,Organismal Injury and Abnormalities	Dysmyelination	1.11E-08	7.95468	1.42674e-08	7.84566	0.724	ABCG2,ACBD5,ADRA1D,ADRA2A,AFF1,AHR,APP,ARHGEF6,ARRB1,ASAP1,ATF6B,ATP11A,ATP1A1,ATP7A,CCL5,CD109,CLEC16A,CPEB3,CSF2RB,CYSLTR1,DOCK8,EHMT2,ETS1,FOXP1,GABRP,GPC5,GTF2H4,HLA-DRB1,IGF2R,IL18R1,IL6,IL7,IQGAP1,ITGB4,ITPR3,JAK1,KCND1,KCNIP1,KCNJ12,KCNQ1,KIT,LAMA4,LAT,LEF1,LPIN1,LRBA,LYST,MERTK,MGAT5B,MICB,MIDEAS,MMEL1,MPHOSPH9,MT-CO1,MT-CO2,MT-ND6,NCOA3,NLRC5,NOTCH1,OAS3,PHACTR2,POLA1,PPARG,PRKCQ,PRKN,PS…	85
Digestive System Development and Function,Embryonic Development,Organismal Development	Development of digestive system	1.37E-11	10.8633	2.4774e-11	10.606	0.711	ABCG2,ACVR2A,ADAR,AHR,ASL,ATF7,AXIN2,BCL2L11,BCOR,BOC,CCDC150,CD34,CDON,CHD7,CLU,CSGALNACT1,DCHS1,EDA,EDNRB,EP300,ERN1,ETV1,FAT4,FOXM1,FOXP1,FRAS1,FST,GABRP,HGF,IFT172,IGF2R,IL6,IL7,IRF6,ITGA6,ITPKB,JARID2,KCNQ1,KIT,KMT2A,LEF1,LHX6,LSR,MRTFB,MTMR4,MTOR,NEDD9,NF1,NIPBL,NOTCH1,NR5A2,PAPOLG,PBX1,PHC1,PRDM1,PRKDC,PTPN11,RFX3,RIPK4,RPS6KA2,SFRP1,SLC24A4,SMAD4,SP1,SPEN,SPTBN1,STIM1,TBC1D32,TFAP2A,TGFBR…	77
Cancer,Organismal Injury and Abnormalities,Reproductive System Disease	Breast or gynecological cancer	6.89E-89	88.1618	8.40244e-88	87.0756	0.702	AASS,ABCA3,ABCA6,ABCB7,ABCC1,ABCG2,ABI1,ABR,ACACA,ACBD5,ACE,ACER2,ACVR2A,ADAMTS10,ADAMTS9,ADCK1,ADCY9,ADGRA2,ADGRF5,ADK,ADORA3,ADRA1D,ADRA2A,ADSS1,AFDN,AFF1,AGTPBP1,AHCTF1,AHCYL2,AHNAK2,AHR,AKAP13,AKAP9,ALDH2,AMOT,ANKHD1-EIF4EBP3,ANKRD24,ANKRD28,ANKRD36,ANKS1A,ANO6,APAF1,APBA1,APCDD1,APOD,APOLD1,APP,AR,ARFGEF1,ARFGEF2,ARFGEF3,ARHGAP19,ARHGAP27,ARHGEF12,ARHGEF28,ARHGEF6,ARID2,ARID4A,ARRB1,ARRDC3,A…	888
Cancer,Organismal Injury and Abnormalities	Multiple cancers	1.64E-57	56.7852	9.64706e-57	56.0156	0.702	AASS,ABCA3,ABCA6,ABCB7,ABCC1,ABCG2,ABR,ACACA,ACBD5,ACE,ACVR2A,ADAMTS10,ADAMTS9,ADCK1,ADCY9,ADGRA2,ADGRF5,ADK,ADORA3,ADRA1D,ADRA2A,ADSS1,AFDN,AGTPBP1,AHCTF1,AHCYL2,AHNAK2,AKAP13,AKAP9,ALDH2,AMOT,ANKRD20A4P (includes others),ANKRD24,ANKRD36,APAF1,APBA1,APCDD1,APOD,APP,AR,ARFGEF1,ARHGAP19,ARHGAP27,ARHGEF12,ARHGEF28,ARID2,ARID4A,ARRB1,ASAP1,ASL,ATAD2B,ATE1,ATF6B,ATG2A,ATP10A,ATP1A1,ATP2B4,ATP7A,ATP7B…	653
Cancer,Organismal Injury and Abnormalities,Reproductive System Disease	Breast or ovarian cancer	2.70E-55	54.5686	1.47541e-54	53.8311	0.702	AASS,ABCA3,ABCA6,ABCB7,ABCC1,ABCG2,ABR,ACACA,ACBD5,ACE,ACVR2A,ADAMTS10,ADAMTS9,ADCK1,ADCY9,ADGRA2,ADGRF5,ADK,ADORA3,ADRA1D,ADRA2A,ADSS1,AFDN,AGTPBP1,AHCTF1,AHNAK2,AKAP13,AKAP9,ALDH2,AMOT,ANKRD24,ANKRD36,APAF1,APBA1,APCDD1,APOD,APP,AR,ARFGEF1,ARHGAP19,ARHGAP27,ARHGEF12,ARHGEF28,ARID2,ARRB1,ASAP1,ASL,ATAD2B,ATE1,ATF6B,ATG2A,ATP10A,ATP1A1,ATP2B4,ATP7A,ATP7B,ATR,AXIN2,B3GNT5,BCAS3,BCL2L11,BCL9,BCOR,B…	630
Cancer,Organismal Injury and Abnormalities,Respiratory Disease	Malignant neoplasm of respiratory system	1.96E-62	61.7077	1.225e-61	60.9119	0.7	AASS,ABCA6,ABCB7,ABCC1,ABCG2,ABR,ACE,ACKR3,ACVR2A,ADAR,ADARB1,ADCY9,ADGRF5,ADORA3,ADRA1D,ADSS1,AFDN,AGTPBP1,AHCTF1,AHNAK2,AHR,AKAP13,AKAP9,AMOT,ANKHD1-EIF4EBP3,ANKRD20A4P (includes others),ANKRD24,ANKRD28,ANKRD33,ANKRD36,ANKS1A,ANO6,APAF1,APBA1,APOD,AR,ARFGEF1,ARFGEF2,ARFGEF3,ARHGAP28,ARHGEF12,ARHGEF28,ARHGEF6,ARID2,ARRB1,ARSG,ASAP2,ATE1,ATG2A,ATP10A,ATP11A,ATP1A1,ATP7A,ATP7B,ATP9A,ATR,AXIN2,BACE…	712
Organismal Injury and Abnormalities,Psychological Disorders	Mood disorders	2.51E-10	9.60033	4.03537e-10	9.39412	0.7	ABI1,ACE,ADARB1,ADRA1D,ADRA2A,ANKRD23,APOD,APP,AR,ARFGEF2,ARSG,ASAP2,ATAT1,ATP1A1,ATP9A,BAZ2B,BEND4,BORCS7-ASMT,C8orf44-SGK3,CAST,CC2D2A,CELF2,CFB,CGNL1,CHD6,CHD7,CHRNA7,CLOCK,CNTNAP1,CRHBP,CSMD2,CYP1A1,DCC,DOP1A,EIF4G3,EIF6,ENTREP1,EP300,ERN1,ETFDH,ETV1,FAT4,FOXO1,FOXO6,GABRP,GALNT18,GIGYF2,GNL1,GPC5,GUCY1A1,HERC1,HTR1B,HTR1D,IDE,IL6,KCNN3,KCNQ1,KDM2B,KDM3B,KIAA1671,KLF12,KMT2A,KMT2C,KSR2,LAMP3,…	143
Organismal Injury and Abnormalities,Psychological Disorders	Depressive disorder	2.44E-08	7.61261	2.9902e-08	7.5243	0.7	ABI1,ACE,ADARB1,ADRA1D,ADRA2A,APP,AR,ARFGEF2,ATAT1,ATP1A1,BAZ2B,BEND4,BORCS7-ASMT,C8orf44-SGK3,CAST,CC2D2A,CELF2,CFB,CHD6,CHD7,CHRNA7,CLOCK,CNTNAP1,CYP1A1,DCC,EIF4G3,EIF6,EP300,ERN1,ETV1,FAT4,FOXO1,GABRP,GALNT18,GIGYF2,GNL1,GPC5,GUCY1A1,HERC1,HTR1B,HTR1D,IL6,KDM2B,KDM3B,KIAA1671,KLF12,KMT2A,KSR2,MAML3,MBNL1,MCC,MECOM,MED12,MERTK,MICB,MPHOSPH9,NBAS,NEDD4L,NLRC5,NPR3,NR3C2,OPRL1,PDE11A,PDE9A,PHTF2,…	110
Cellular Movement	Cellular infiltration	1.04E-10	9.98297	1.75676e-10	9.75529	0.695	ADAR,AHR,ALDH2,APOD,APP,AR,ARRB1,BCL9,BMPR2,CAST,CBL,CCL5,CCR7,CD93,CFB,CHD4,CMKLR1,CSF2RB,CX3CL1,CYSLTR1,DGKA,DPP4,EPAS1,ERN1,ETS1,FAM171B,FLT1,FOXM1,FOXO6,FST,GATA2,HGF,IFIH1,IL24,IL6,IL7,INPP5D,IRAK3,IRF6,ITGA1,ITGB4,JAK1,JAM3,KDR,KMT2C,LAMA4,MERTK,NF1,NFATC1,NOTCH1,NPR1,NR3C2,PARG,PFKFB3,PIK3CG,PIK3R2,PLCG1,PLD1,PPARG,PRDM1,PREX1,PRKCQ,PRKN,PSMB8,PTGDR2,PTPN11,RGS5,RORA,RPTOR,SATB1,SETD2,SFRP…	93
Cancer,Organismal Injury and Abnormalities,Renal and Urological Disease	Development of urinary tract tumor	8.13E-28	27.0899	2.74662e-27	26.5612	0.692	ACVR2A,ADGRF5,ADORA3,ADSS1,AFDN,AKAP9,ALDH2,ANKRD36,APOD,APP,AR,ARFGEF3,ARID2,ASAP1,ATF7,ATP13A3,ATR,AXIN2,BFAR,BRCA2,BRME1,C2CD2,C2orf81,CALCRL,CCDC150,CCDC80,CCL5,CDK5RAP2,CDK6,CEP170,CEP20,CGNL1,CHURC1-FNTB,CIT,CLDN7,CLIP3,CLOCK,CLU,COL7A1,CRACD,CREBRF,CRYBG1,CSF2RB,CTDSPL,CUL9,CX3CL1,CYP1A1,DACH1,DCAF11,DCLRE1A,DENND5A,DIRAS1,DNAJC16,DNALI1,DNMBP,DOCK8,DOP1A,E2F8,EEF1B2,EP300,EP400,EPAS1,ETS1…	254
Cancer,Gastrointestinal Disease,Organismal Injury and Abnormalities	Upper gastrointestinal tract tumor	5.99E-71	70.2226	4.75397e-70	69.3229	0.677	AASS,ABCA6,ABCB7,ABCC1,ABCG2,ABR,ACBD4,ACBD5,ACVR2A,ADAMTS10,ADAMTS9,ADAR,ADARB1,ADCK1,ADCY9,ADGRA2,ADK,ADRA1D,ADRA2A,ADSS1,AFAP1L1,AFDN,AFF1,AGTPBP1,AHCTF1,AHCYL2,AHNAK2,AHR,AKAP13,AKAP9,ALDH2,ANKRD20A4P (includes others),ANKRD23,ANKRD24,ANKRD28,ANKRD36,ANKRD65,ANKS1A,APAF1,APBA1,APP,AR,ARFGEF1,ARFGEF2,ARFGEF3,ARHGAP19,ARHGAP28,ARHGEF6,ARID2,ARID4A,ARSG,ASAP1,ASAP2,ASL,ATAD2B,ATG2A,ATP10A,ATP11A…	705
Cancer,Gastrointestinal Disease,Hepatic System Disease,Organismal Injury and Abnormalities	Hepatobiliary carcinoma	2.33E-69	68.6326	1.77863e-68	67.7499	0.677	AASS,ABCA3,ABCA6,ABCC1,ABCG2,ABI1,ACACA,ACE,ACKR3,ACVR2A,ADAMTS10,ADAMTS9,ADAR,ADARB1,ADCK1,ADK,ADORA3,ADRA1D,ADRA2A,AFAP1L1,AFDN,AFF1,AGTPBP1,AHCTF1,AHNAK2,AHR,AKAP13,AKAP9,ALDH2,AMOT,ANKHD1-EIF4EBP3,ANKRD20A4P (includes others),ANKRD24,ANKRD36,ANKS1A,ANO6,APAF1,APBA1,AR,ARFGEF1,ARFGEF2,ARFGEF3,ARHGAP27,ARHGEF12,ARHGEF28,ARID2,ARID4A,ARRB1,ARSG,ASAP1,ASAP2,ATAT1,ATE1,ATG2A,ATL1,ATP10A,ATP11A,ATP…	685
Cell Death and Survival,Organismal Injury and Abnormalities	Cell death of blood cells	3.92E-13	12.4067	7.85571e-13	12.1048	0.66	ABCC1,ADAR,ADORA3,AHR,APAF1,APP,ARRB1,ATF7,BCL2L11,BIRC6,CAST,CBL,CCL5,CCR7,CD74,CDK6,CHD4,CLEC11A,CLOCK,CLU,CSF2RB,CUL9,CX3CL1,DAXX,DOCK8,DRAM2,EBF1,EDNRB,EP300,EPAS1,EPHA4,ERN1,ETS1,EZH2,FCMR,FLI1,FOXO1,FOXP1,GAB2,GATA2,GHR,HDAC9,HGF,IER3,IFIH1,IL24,IL6,IL7,INPP5D,IRAK3,ITPKB,ITPR3,JAK1,KIFAP3,KIT,KLF13,LAT,LEF1,MAP2K6,MCF2L,MECOM,MERTK,MT2A,MTOR,NF1,NFATC1,NOTCH1,PARP14,PELI2,PFKFB3,PIK3CG,PIK…	107
Cancer,Organismal Injury and Abnormalities,Reproductive System Disease	Development of genital tumor	1.40E-86	85.8539	1.59091e-85	84.7984	0.655	AASS,ABCA3,ABCA6,ABCB7,ABCC1,ABCG2,ABI1,ABR,ACE,ACER2,ACVR2A,ADAMTS10,ADAMTS9,ADARB1,ADCK1,ADCY9,ADGRF5,ADORA3,AFDN,AFF1,AGTPBP1,AHCTF1,AHCYL2,AHNAK2,AHR,AKAP13,AKAP9,ALDH2,AMOT,ANKHD1-EIF4EBP3,ANKRD24,ANKRD28,ANKRD36,ANKS1A,ANO6,APBA1,APCDD1,APOD,APOLD1,APP,AR,ARFGEF1,ARFGEF2,ARFGEF3,ARHGAP19,ARHGAP27,ARHGEF12,ARHGEF28,ARHGEF6,ARID2,ARID4A,ARRB1,ARRDC3,ARSL,ASAP1,ATAD2B,ATG2A,ATL1,ATP10A,ATP11A,…	757
Cancer,Organismal Injury and Abnormalities	Melanoma	2.93E-112	111.533	7.325e-111	110.135	0.637	AASS,ABCA3,ABCA6,ABCB7,ABCC1,ABCG2,ABI1,ABR,ACBD4,ACBD5,ACE,ACKR3,ACVR2A,ADAMTS10,ADAMTS9,ADAR,ADARB1,ADCK1,ADCY9,ADGRF5,ADK,ADORA3,ADSS1,AFAP1L1,AFDN,AFF1,AGTPBP1,AHCTF1,AHCYL2,AHNAK2,AHR,AKAP13,AKAP9,AKR1E2,ALDH2,AMIGO3,AMOT,ANKHD1-EIF4EBP3,ANKRD20A4P (includes others),ANKRD23,ANKRD24,ANKRD28,ANKRD33,ANKRD36,ANKS1A,ANO6,APBA1,APCDD1,APOD,APP,AR,ARFGEF1,ARFGEF2,ARFGEF3,ARHGAP19,ARHGAP27,ARHGAP28…	994
Cancer,Organismal Injury and Abnormalities	Breast or pancreatic cancer	3.99E-64	63.399	2.57419e-63	62.5894	0.634	AASS,ABCA3,ABCA6,ABCB7,ABCC1,ABCG2,ABR,ACBD5,ACE,ACKR3,ACVR2A,ADAMTS10,ADAMTS9,ADAR,ADARB1,ADCK1,ADCY9,ADGRA2,ADGRF5,ADK,ADORA3,ADRA1D,ADRA2A,ADSS1,AFDN,AFF1,AGTPBP1,AHCTF1,AHNAK2,AHR,AKAP13,AKAP9,ALDH2,AMOT,ANKHD1-EIF4EBP3,ANKRD24,ANKRD36,APAF1,APOD,APP,AR,ARFGEF1,ARFGEF2,ARHGAP19,ARHGAP27,ARHGEF12,ARHGEF6,ARID2,ARRB1,ARSL,ASL,ATAD2B,ATE1,ATF6B,ATG2A,ATP10A,ATP11A,ATP1A1,ATP2B4,ATP7A,ATP7B,ATR,A…	679
Cancer,Organismal Injury and Abnormalities	Extracranial solid tumor	1.61E-109	108.793	3.5e-108	107.456	0.63	AASS,ABCA3,ABCA6,ABCB7,ABCC1,ABCG2,ABI1,ABR,ACACA,ACBD4,ACBD5,ACE,ACER2,ACKR3,ACVR2A,ADAMTS10,ADAMTS9,ADAR,ADARB1,ADCK1,ADCY9,ADGRA2,ADGRF5,ADK,ADORA3,ADRA1D,ADRA2A,ADSS1,AFAP1L1,AFDN,AFF1,AGTPBP1,AHCTF1,AHCYL2,AHNAK2,AHR,AKAP13,AKAP9,AKR1E2,ALDH2,AMIGO3,AMOT,ANKHD1-EIF4EBP3,ANKRD20A4P (includes others),ANKRD23,ANKRD24,ANKRD28,ANKRD33,ANKRD36,ANKRD65,ANKS1A,ANO6,APAF1,APBA1,APCDD1,APOD,APOLD1,APP…	1203
Cellular Development,Cellular Growth and Proliferation,Organ Development,Skeletal and Muscular System Development and Function,Tissue Development	Proliferation of muscle cells	1.10E-09	8.95861	1.63934e-09	8.78533	0.625	AHR,APOD,AR,ARID2,BMPR2,CALCRL,CBL,CCL5,CCN3,CDK6,CHD4,CLU,CMKLR1,CX3CL1,DPP4,EFNB2,FLT1,FOXM1,FOXO1,FOXP1,FST,GPER1,HEY2,HGF,HPS5,IGFBP5,IL6,ITGA2,ITGA6,JARID2,KALRN,KIT,KLF11,MAML1,MTOR,NF1,NFATC1,NOTCH1,NPR1,NPR3,NR3C2,PLD1,PPARG,PRKCQ,PTPN11,ROCK2,RXRB,SHC1,SMAD1,SMAD4,SP1,SPHK1,ST8SIA1,STAT1,STIM1,TGFBR2,TGFBR3,TNC,TNFRSF12A,TNFSF9,TRIM32,VCAN,VCP,VIP,WWP2,ZNF609	66
Cancer,Gastrointestinal Disease,Organismal Injury and Abnormalities	Development of digestive organ tumor	1.13E-95	94.9469	1.4125e-94	93.85	0.618	AASS,ABCA3,ABCA6,ABCB7,ABCC1,ABCG2,ABR,ACBD4,ACBD5,ACKR3,ACVR2A,ADAMTS10,ADAMTS9,ADAR,ADARB1,ADCK1,ADCY9,ADGRA2,ADGRF5,ADK,ADORA3,ADSS1,AFAP1L1,AFDN,AFF1,AGTPBP1,AHCTF1,AHCYL2,AHNAK2,AHR,AKAP13,AKAP9,ALDH2,AMIGO3,AMOT,ANKHD1-EIF4EBP3,ANKRD20A4P (includes others),ANKRD23,ANKRD24,ANKRD28,ANKRD36,ANKRD65,ANKS1A,APAF1,APBA1,APCDD1,APOD,APP,AR,ARFGEF1,ARFGEF3,ARHGAP19,ARHGAP27,ARHGAP28,ARHGEF28,ARHGEF…	849
Cancer,Organismal Injury and Abnormalities	Non-melanoma solid tumor	1.88E-119	118.726	8.72727e-118	117.059	0.605	AASS,ABCA3,ABCA6,ABCB7,ABCC1,ABCG2,ABI1,ABR,ACACA,ACBD4,ACBD5,ACE,ACER2,ACKR3,ACVR2A,ADAMTS10,ADAMTS9,ADAR,ADARB1,ADCK1,ADCY9,ADGRA2,ADGRF5,ADK,ADORA3,ADRA1D,ADRA2A,ADSS1,AFAP1L1,AFDN,AFF1,AGTPBP1,AHCTF1,AHCYL2,AHNAK2,AHR,AKAP13,AKAP9,AKR1E2,ALDH2,AMIGO3,AMOT,ANKHD1-EIF4EBP3,ANKRD20A4P (includes others),ANKRD23,ANKRD24,ANKRD28,ANKRD33,ANKRD36,ANKRD65,ANKS1A,ANO6,APAF1,APBA1,APCDD1,APOD,APOLD1,APP…	1198
Cancer,Endocrine System Disorders,Organismal Injury and Abnormalities	Nonpituitary endocrine tumor	2.37E-117	116.625	8.67857e-116	115.062	0.6	ABCA3,ABCA6,ABCB7,ABCC1,ABCG2,ABI1,ABR,ACBD5,ACE,ACER2,ACVR2A,ADAMTS10,ADAMTS9,ADAR,ADARB1,ADCY9,ADGRA2,ADORA3,ADRA1D,ADRA2A,ADSS1,AFAP1L1,AFDN,AFF1,AGTPBP1,AHCTF1,AHCYL2,AHNAK2,AHR,AKAP13,AKAP9,ALDH2,AMIGO3,AMOT,ANKHD1-EIF4EBP3,ANKRD20A4P (includes others),ANKRD23,ANKRD24,ANKRD28,ANKRD33,ANKRD36,ANKRD65,ANKS1A,ANO6,APAF1,APBA1,APCDD1,APOD,APP,AR,ARFGEF1,ARFGEF2,ARFGEF3,ARHGAP19,ARHGAP27,ARHGAP28…	1034
Cancer,Hematological Disease,Immunological Disease,Organismal Injury and Abnormalities	T-lymphoblastic leukemia/lymphoma	3.86E-10	9.41341	6.10759e-10	9.21413	0.6	ADORA3,AFDN,AHNAK2,ARHGAP27,ARID4A,ARSL,BCOR,BRCA2,CAND2,CCDC88C,CD34,CEP170,CHD4,CNOT3,CUL9,DENND2C,DOCK8,EBF1,EDEM3,EP300,EPHA4,EZH2,FAT4,FOXP1,GATA2,HDAC6,HERC2,HPS5,IRX5,JAK1,JAM3,JMJD1C,JPH2,KIAA1549,KIAA1549L,KIT,KMT2A,KMT2C,LEF1,MAML3,MED12,MGA,MPDZ,MTOR,NAALAD2,NAV2,NF1,NFXL1,NOTCH1,NUP98,PCDH17,PKP4,PLEKHM1,POLA1,PPFIA3,PPP1R16B,PRAG1,PRDM2,PREX1,PTPN11,PTPN21,RGPD3 (includes others),RGS…	81
Cancer,Organismal Injury and Abnormalities,Tissue Morphology	Quantity of tumor	1.45E-08	7.83863	1.83312e-08	7.73681	0.599	AHR,ARID2,ATP1A1,ATP9A,AXIN2,BCL2L11,BMAL1,BMPR2,BRCA2,CBL,CCL5,COL7A1,CX3CL1,DCC,DROSHA,EDNRB,EFNB2,ELK4,EP300,EZH2,FANCM,FOXM1,FOXO1,GNMT,HIP1,IGF2R,IL6,IQGAP1,ITPKB,KCNJ5,KDR,KIT,LEF1,LYST,MAP3K1,MCC,MT-ND6,MTOR,NEDD9,NF1,NOTCH1,NRIP1,PLCG1,PPARG,PRKN,PTPN11,RASAL2,SMAD4,SPEN,SPHK1,TGFBR2,TNC,TNFRSF12A,TOP2B,TP53BP1,TRPV1,TSC1	57
Cell Cycle	S phase	1.90E-08	7.72125	2.36025e-08	7.62704	0.599	AHR,APP,AR,ATR,CDK6,CHRNA7,E2F8,EP300,EP400,FOXM1,GEN1,GTF2I,HGF,IL6,IL7,ITGA2,ITGA6,KIF20B,KLF12,MTOR,NCOA3,NEK9,NOTCH1,NRIP1,PARG,PBX1,PFKFB3,PLCG1,POLA1,POMC,PPARG,PRKAA2,PRKN,PTPN11,REL,SH2B3,SHC1,ST8SIA1,TGFBR2,TP53BP1,TSC22D3,TTI1,YOD1,ZBED6,ZBTB10,ZBTB16	46
Cellular Development,Cellular Growth and Proliferation,Organ Development,Skeletal and Muscular System Development and Function,Tissue Development	Proliferation of smooth muscle cells	5.97E-09	8.22403	7.93883e-09	8.10024	0.583	AHR,APOD,AR,BMPR2,CALCRL,CBL,CCL5,CCN3,CDK6,CLU,CMKLR1,CX3CL1,DPP4,EFNB2,FLT1,FOXM1,FOXO1,FOXP1,GPER1,HGF,HPS5,IGFBP5,IL6,ITGA2,KALRN,KLF11,MTOR,NF1,NFATC1,NOTCH1,NPR1,NPR3,NR3C2,PPARG,PTPN11,ROCK2,SHC1,SMAD4,SP1,ST8SIA1,STAT1,STIM1,TGFBR2,TNC,TNFSF9,VCAN,VIP,WWP2	48
Cell Death and Survival,Organismal Injury and Abnormalities	Cell death of breast cancer cell lines	7.88E-08	7.10347	9.18415e-08	7.03696	0.564	ABCG2,AHR,APAF1,AR,BCL2L11,BMX,CCDC80,CDK7,CIB1,CLU,DAB2,DROSHA,EHMT2,EP300,FOXM1,GPER1,GPR176,HDAC9,HGF,HSPA1A,IER3,IGFBP5,IL24,ITGA2,ITGB4,KDM2B,KLF12,KLF8,MAP2K6,MARCHF8,MOAP1,MRPL52,MTHFD2,MTOR,MYO6,NCOA3,NEDD9,NOTCH1,NTSR1,OAS3,PFKFB3,PLCG1,PPARG,PRDM2,PRKD2,PRKDC,PRKN,RHOBTB2,RNASEH2C,SCGB3A1,SFN,SFRP1,SMAD4,SMARCA1,SP1,SPHK1,STAT1,TFAP2A,TGFBR3,TRIM39,VCP,WWTR1	62
Cell Death and Survival,Organismal Injury and Abnormalities	Cell death of epithelial cells	1.79E-09	8.74715	2.58297e-09	8.58788	0.563	ABCC1,ABCG2,ACE,ADAR,AHR,ALDH2,APAF1,APP,AR,ATF7,ATP7B,BCL2L11,CBL,CDK6,CDON,CIT,CLU,CYSLTR1,DAB2,DAXX,DCC,E2F8,EFNB2,EP400,ERN1,ETS1,FOXO1,HDAC6,HGF,IER3,IFIH1,IGFBP5,IL24,IL6,IQGAP2,IRAK3,ITGA6,ITGB4,ITPR3,KLF8,LAMA4,LEF1,MAML1,MAP2K6,MAP3K1,MAPKAPK3,MECOM,MED12,MERTK,MOAP1,MRPL23,MTOR,NOTCH1,OAS2,OAS3,OFD1,PIK3CG,PLCB1,POMC,PPARG,PRKAA2,PRKCQ,PRKDC,PTPN11,REL,RFXANK,RNASEH2C,SELENOP,SFRP1,SH3B…	85
Cancer,Cardiovascular Disease,Organismal Injury and Abnormalities	Vascular tumor	3.46E-15	14.4609	7.99076e-15	14.0974	0.555	ABCG2,ACKR3,AFDN,AR,ATR,AXIN2,BCOR,BMPR2,BRCA2,CD34,CHD4,CLU,CSF2RB,CX3CL1,DAXX,EDNRB,EPAS1,EPHA4,EZH2,FANCB,FANCM,FAT4,FLNB,FLT1,GNA14,GNMT,HDAC6,HGF,IGFBP5,IL6,IQGAP2,JAK1,KDR,KIAA1549,KIT,KMT2A,KMT2C,LHX6,LIFR,MAP3K1,MECOM,MKI67,MLLT3,MTOR,NF1,NOTCH1,NPR1,NRP2,NSD1,PIK3CG,PLCB4,PLCG1,PPARG,PRDM1,PRKDC,PRKN,RANBP2,RCAN2,REST,RNF213,RXRB,SETD2,SH2B3,TEK,TGFBR2,TGFBR3,TJP1,TOP2B,TSC1,VCAN	70
Cancer,Neurological Disease,Organismal Injury and Abnormalities	Neuroblastoma	1.01E-13	12.9957	2.13531e-13	12.6705	0.555	ABCC1,ANKHD1-EIF4EBP3,AR,ARHGAP27,ASAP2,BCOR,BRCA2,CCNB1IP1,CDK6,CEP295,CGNL1,CLU,CRIM1,CSF2RB,DLGAP4,DOCK8,DROSHA,EP300,EPB41L4A,EXOC6B,EZH2,FOLH1,FOXM1,FSIP2,HES4,HLA-DRB1,IDE,IFT172,IL24,KALRN,KMT2A,KMT2C,LAMP3,LENG8,LHX6,LRBA,MDC1,MED23,MERTK,MGA,MMEL1,MRPS18B,MTCL1,NCSTN,NF1,NIPBL,OAZ1,PCDHGA11,PCDHGB1,PCDHGB6,PCDHGB7,PHC1,PLPP3,PRR14L,PTPN11,RALGAPA2,RGS12,RGS5,RP1L1,SHE,STK10,TAF1,TOP2B,TS…	70
Cancer,Organismal Injury and Abnormalities	Catecholamine-secreting tumor	2.66E-13	12.5751	5.45082e-13	12.2635	0.555	ABCC1,ANKHD1-EIF4EBP3,AR,ARHGAP27,ASAP2,BCOR,BRCA2,CCNB1IP1,CDK6,CEP295,CGNL1,CLU,CRIM1,CSF2RB,DLGAP4,DOCK8,DROSHA,EP300,EPB41L4A,EXOC6B,EZH2,FANCM,FOLH1,FOXM1,FSIP2,HES4,HLA-DRB1,IDE,IFT172,IL24,KALRN,KMT2A,KMT2C,LAMP3,LENG8,LHX6,LRBA,MDC1,MED23,MERTK,MGA,MMEL1,MRPS18B,MTCL1,NCSTN,NF1,NIPBL,OAZ1,PCDHGA11,PCDHGB1,PCDHGB6,PCDHGB7,PHC1,PLPP3,PRR14L,PTPN11,RALGAPA2,RGS12,RGS5,RP1L1,SHE,STK10,TAF1,TO…	71
Cancer,Organismal Injury and Abnormalities	Epithelial neoplasm	4.51E-124	123.346	4.1e-122	121.387	0.545	AASS,ABCA3,ABCA6,ABCB7,ABCC1,ABCG2,ABI1,ABR,ACACA,ACBD4,ACBD5,ACE,ACER2,ACKR3,ACVR2A,ADAMTS10,ADAMTS9,ADAR,ADARB1,ADCK1,ADCY9,ADGRA2,ADGRF5,ADK,ADORA3,ADRA1D,ADRA2A,ADSS1,AFAP1L1,AFDN,AFF1,AGTPBP1,AHCTF1,AHCYL2,AHNAK2,AHR,AKAP13,AKAP9,AKR1E2,ALDH2,AMIGO3,AMOT,ANKHD1-EIF4EBP3,ANKRD20A4P (includes others),ANKRD23,ANKRD24,ANKRD28,ANKRD33,ANKRD36,ANKRD65,ANKS1A,ANO6,APAF1,APBA1,APCDD1,APOD,APOLD1,APP…	1196
Cancer,Organismal Injury and Abnormalities,Reproductive System Disease	Breast carcinoma	3.34E-58	57.4763	2e-57	56.699	0.539	AASS,ABCG2,ABR,ACBD5,ACE,ACVR2A,ADAMTS10,ADAMTS9,ADCK1,ADCY9,ADORA3,ADRA1D,ADSS1,AFDN,AGTPBP1,AHCTF1,AKAP13,AKAP9,ALDH2,AMOT,ANKRD24,ANKRD36,APAF1,APOD,AR,ARFGEF1,ARHGAP19,ARHGAP27,ARHGEF12,ARID2,ARRB1,ASL,ATAD2B,ATE1,ATF6B,ATG2A,ATP10A,ATP1A1,ATP2B4,ATP7B,ATR,AXIN2,B3GNT5,BCAS3,BCL2L11,BCL9,BCOR,BIRC6,BMAL1,BMAL2,BMPR2,BMX,BRCA2,BTBD8,CASK,CAST,CBL,CC2D2A,CCDC180,CCDC80,CCDC88C,CCR7,CD109,CD34,C…	469
Immunological Disease,Organismal Injury and Abnormalities	Immediate hypersensitivity	2.85E-07	6.54516	3.05466e-07	6.51504	0.538	ADRA1D,ADRA2A,AFF1,AHR,ALDH2,CCL23,CCL5,CD74,CHD4,CHM,CLEC16A,CMKLR1,CSF2RB,CSGALNACT1,CYSLTR1,EFHC1,EFR3A,ERMP1,ETS1,EZH2,FOXP1,GAB2,GATAD2B,HLA-C,HLA-DRB1,IDE,IL18R1,IL6,INPP5D,IQGAP1,ITGA6,JAK1,KIT,LAT,LPL,MICB,MKI67,MTOR,NCR3LG1,PDE4C,PIK3CG,POMC,PPARG,PRDM1,PREX1,PTGDR2,RERE,RORA,RPRD2,S100A2,SATB1,SLC44A4,STAT1,STIM1,SYBU,TAP2,TDRKH,TLR1,TNFRSF11A,TNFSF4,TRAF1,TSC1,TUBB,VAV3,VCP	65
Cellular Movement	Cellular infiltration by blood cells	8.79E-10	9.05601	1.33182e-09	8.87556	0.525	ADAR,AHR,APOD,APP,AR,ARRB1,BCL9,BMPR2,CAST,CCL5,CCR7,CD93,CFB,CMKLR1,CSF2RB,CX3CL1,CYSLTR1,DPP4,EPAS1,ERN1,ETS1,FAM171B,FLT1,FOXM1,FOXO6,GATA2,HGF,IFIH1,IL24,IL6,IL7,INPP5D,IRAK3,IRF6,ITGA1,ITGB4,JAK1,JAM3,KDR,KMT2C,LAMA4,MERTK,NF1,NFATC1,NOTCH1,NPR1,NR3C2,PARG,PFKFB3,PIK3CG,PIK3R2,PLCG1,PLD1,PPARG,PRDM1,PREX1,PRKCQ,PRKN,PSMB8,PTGDR2,PTPN11,RGS5,RORA,RPTOR,SATB1,SETD2,SFRP1,SMAD4,SPHK1,SPTLC2,STA…	85
Cancer,Organismal Injury and Abnormalities	Blue round small cell tumor	1.44E-49	48.8416	7.38462e-49	48.1317	0.522	AASS,ABCA6,ABCB7,ABCC1,ABCG2,ABR,ACE,ACVR2A,ADAR,ADCY9,ADORA3,AFDN,AHCTF1,AHNAK2,AKAP13,AMOT,ANKHD1-EIF4EBP3,ANKRD20A4P (includes others),ANKRD24,ANKRD28,ANKRD33,ANO6,APAF1,AR,ARFGEF3,ARHGAP27,ARHGEF12,ARID2,ARRB1,ARSG,ASAP2,ATP10A,ATP11A,ATP1A1,ATP2B4,ATP7A,ATP9A,ATR,BCL9,BCOR,BIRC6,BMAL1,BMX,BOC,BRCA2,C2orf81,CARF,CAST,CAVIN2,CBL,CC2D2A,CCDC144A,CCDC150,CCDC88C,CCNB1IP1,CD74,CD93,CDC14A,CDK6,CE…	463
Cancer,Hematological Disease,Immunological Disease,Organismal Injury and Abnormalities	Acute lymphoblastic leukemia	2.85E-12	11.5452	5.40797e-12	11.267	0.522	ACE,ADGRA2,ADORA3,ADRA1D,AFF1,AHNAK2,ANKS1A,AR,ARID2,ATP10A,ATP11A,ATP13A3,BCOR,BMAL2,BRCA2,CBL,CCDC180,CD34,CHD4,CHM,CYP1A1,DCAF11,DCHS1,DCLRE1A,DOC2B,DOCK9,DOP1B,E2F8,EBF1,EHMT2,EML6,EP300,EZH2,FAT4,FBXL7,FCHSD2,FIP1L1,FMC1-LUC7L2,FOXM1,GATA2,GHR,GMPPA,HDAC6,HLA-C,HMCN1,JAK1,JPH4,KCNN3,KDM2B,KDM3B,KDR,KIT,KMT2A,LAMB2,LEF1,LIFR,LRBA,LRCH2,LTBP1,MACF1,MAGI1,MANEAL,MAST4,MCF2L2,MED12,MED16,MERTK,M…	127
Organismal Injury and Abnormalities	Size of lesion	4.97E-08	7.30364	5.90261e-08	7.22896	0.519	ACE,ADORA3,AFAP1L1,AKAP13,APOD,APP,ARHGEF28,C1QL3,CD74,CLU,CX3CL1,DAXX,DGKA,ELK4,EP300,EPHA4,FLT1,FOLH1,FOXM1,FOXO1,GPER1,HGF,HIPK3,HMGCS1,HSPA1A,IL6,IL7,INHBB,IQGAP1,IQGAP2,ITGA1,KDR,KIT,KLF13,KMT2C,LPL,MBNL1,MTHFD2,NBEAL2,NCOA3,NEDD4L,NF1,NPR1,NPR3,NR3C2,OPRL1,PIK3CG,PLCB1,PLCG1,PRKN,RASAL2,RRAD,SELENOP,SETD2,SH3BP5,SHC1,SHROOM4,SMAD1,SPTBN1,ST8SIA4,STING1,STS,TEK,TGFBR2,TNFSF4,TRPV1,TSC1,TXNDC…	73
Endocrine System Disorders,Gastrointestinal Disease,Metabolic Disease,Organismal Injury and Abnormalities	Diabetes mellitus	5.69E-19	18.2449	1.58056e-18	17.8012	0.517	ABCC1,ABCG2,ACACA,ACBD4,ACE,ACER2,ADAMTS9,ADARB1,ADK,ADRA1D,ADRA2A,AHNAK2,AHR,ALDH2,ANKRD28,ANO6,APCDD1,APOD,APOLD1,APP,AR,ARHGEF6,ARID2,ARID4A,ARSG,ASAP1,ASL,ATP10A,ATP11A,ATP1A1,ATP2B4,ATP6V1G2,BACE2,BCL2L11,BDH1,BEND4,BIRC6,BMAL1,BMPR2,BOC,BRCA2,CAMKK2,CAND2,CAST,CAVIN2,CCDC144A,CCDC80,CCDC88C,CCL5,CCNB1IP1,CCR7,CD34,CD74,CDC42BPA,CDK6,CDS2,CECR2,CELF1,CEP120,CEP290,CFB,CGNL1,CHD4,CLEC16A,CLU,…	331
Cancer,Organismal Injury and Abnormalities	Abdominal cancer	2.60E-114	113.585	7.22222e-113	112.141	0.501	AASS,ABCA3,ABCA6,ABCB7,ABCC1,ABCG2,ABI1,ABR,ACACA,ACBD4,ACBD5,ACE,ACER2,ACKR3,ACVR2A,ADAMTS10,ADAMTS9,ADAR,ADARB1,ADCK1,ADCY9,ADGRA2,ADGRF5,ADK,ADORA3,ADRA1D,ADRA2A,ADSS1,AFAP1L1,AFDN,AFF1,AGTPBP1,AHCTF1,AHCYL2,AHNAK2,AHR,AKAP13,AKAP9,AKR1E2,ALDH2,AMIGO3,AMOT,ANKHD1-EIF4EBP3,ANKRD20A4P (includes others),ANKRD23,ANKRD24,ANKRD28,ANKRD33,ANKRD36,ANKRD65,ANKS1A,ANO6,APAF1,APBA1,APCDD1,APOD,APOLD1,APP…	1166
Cancer,Organismal Injury and Abnormalities	Head and neck tumor	1.75E-137	136.757	1.75e-134	133.757	0.5	AASS,ABCA3,ABCA6,ABCB7,ABCC1,ABCG2,ABI1,ABR,ACBD5,ACE,ACER2,ACKR3,ACVR2A,ADAMTS10,ADAMTS9,ADAR,ADARB1,ADCK1,ADCY9,ADGRA2,ADGRF5,ADORA3,ADRA1D,ADRA2A,ADSS1,AFAP1L1,AFDN,AFF1,AGTPBP1,AHCTF1,AHCYL2,AHNAK2,AHR,AKAP13,AKAP9,AKR1E2,ALDH2,AMIGO3,AMOT,ANKHD1-EIF4EBP3,ANKRD20A4P (includes others),ANKRD23,ANKRD24,ANKRD28,ANKRD33,ANKRD36,ANKRD65,ANKS1A,ANO6,APAF1,APBA1,APCDD1,APOD,APP,AR,ARFGEF1,ARFGEF2,ARF…	1138
Cancer,Organismal Injury and Abnormalities,Reproductive System Disease	Prostatic tumor	2.39E-67	66.6216	1.75735e-66	65.7551	0.497	ABCA3,ABCC1,ABCG2,ABR,ACVR2A,ADAR,ADCY9,ADGRA2,ADRA1D,ADRA2A,ADSS1,AFF1,AHCTF1,AHNAK2,AKAP13,AKAP9,ALDH2,ANKHD1-EIF4EBP3,ANKRD20A4P (includes others),ANKRD23,ANKRD36,ANO6,APBA1,APOD,APOLD1,AR,ARFGEF2,ARFGEF3,ARHGAP28,ARHGEF12,ARID2,ARRDC3,ASAP2,ATAT1,ATE1,ATG2A,ATOSA,ATP11A,ATP1A1,ATP2B4,ATP6V1A,ATR,AXIN2,BAZ2A,BAZ2B,BCAS3,BCL2L11,BCL9,BDH1,BICRAL,BIRC6,BMPR2,BMX,BRCA2,BRME1,C8orf82,CALCRL,CARF,C…	573
Cancer,Organismal Injury and Abnormalities,Respiratory Disease	Lung cancer	1.05E-56	55.9788	5.96591e-56	55.2243	0.497	AASS,ABCA6,ABCB7,ABCC1,ABCG2,ABR,ACE,ACKR3,ACVR2A,ADAR,ADARB1,ADCY9,ADGRF5,ADORA3,ADRA1D,ADSS1,AFDN,AGTPBP1,AHCTF1,AHNAK2,AHR,AKAP13,AKAP9,AMOT,ANKHD1-EIF4EBP3,ANKRD20A4P (includes others),ANKRD24,ANKRD28,ANKRD33,ANKRD36,ANKS1A,ANO6,APAF1,APBA1,APOD,AR,ARFGEF1,ARFGEF2,ARHGAP28,ARHGEF12,ARHGEF28,ARHGEF6,ARID2,ARRB1,ARSG,ATE1,ATG2A,ATP10A,ATP11A,ATP1A1,ATP7A,ATP7B,ATP9A,ATR,AXIN2,BACE2,BAZ2A,BCAS3,…	676
Cellular Function and Maintenance	Function of blood cells	3.62E-08	7.44129	4.3562e-08	7.36089	0.487	ABCC1,ADORA3,AHR,AKAP13,ANO6,ARHGEF6,BCL2L11,BMPR2,CBL,CCL5,CCN3,CCR7,CD74,CLCN3,CMKLR1,CSF2RB,CX3CL1,DOCK8,ERN1,ETS1,FCMR,FLT1,GAB2,GATA2,HGF,IFIH1,IL18R1,IL6,IL7,INPP5D,IRAK3,ITGA2,ITGA2B,JAM2,KDR,KIT,LAT,LCP1,MECOM,MERTK,MT2A,MTOR,NBEAL2,NEDD9,NF1,NFATC1,NLRC5,NTAN1,PIK3CG,PLD1,PPARG,PRKCQ,PRKDC,PTPRCAP,RASGRF2,RCAN2,REL,RFX7,ST6GAL1,STAT1,STAT2,STK10,TEC,TLR1,TLR6,TNFSF9,UBD,UBE2S,VWF	69
Cancer,Organismal Injury and Abnormalities,Reproductive System Disease	Breast cancer	1.78E-47	46.7496	8.27907e-47	46.082	0.48	AASS,ABCA6,ABCB7,ABCC1,ABCG2,ABR,ACBD5,ACE,ACVR2A,ADAMTS10,ADAMTS9,ADCK1,ADCY9,ADGRA2,ADGRF5,ADK,ADORA3,ADRA1D,ADRA2A,ADSS1,AFDN,AGTPBP1,AHCTF1,AKAP13,AKAP9,ALDH2,AMOT,ANKRD24,ANKRD36,APAF1,APOD,APP,AR,ARFGEF1,ARHGAP19,ARHGAP27,ARHGEF12,ARID2,ARRB1,ASL,ATAD2B,ATE1,ATF6B,ATG2A,ATP10A,ATP1A1,ATP2B4,ATP7A,ATP7B,ATR,AXIN2,B3GNT5,BCAS3,BCL2L11,BCL9,BCOR,BIRC6,BMAL1,BMAL2,BMPR2,BMX,BRCA2,BTBD8,CASK,CAS…	523
Organismal Injury and Abnormalities	Blood clot	4.44E-07	6.35262	4.59152e-07	6.33804	0.48	ABCC1,ACACA,ACKR3,AHR,ANO6,APP,AR,BMPR2,CD93,CEP290,CFB,DACH1,DOCK8,EDNRB,EPB41L4B,F8,FOLH1,HIVEP1,HRCT1,IL6,INPP5D,IQGAP2,ITGA2B,ITPR3,JMJD1C,KALRN,KDR,KIFAP3,LAT,LPL,MCF2L,MERTK,MPHOSPH9,NAV2,NCAM2,NR3C2,PDE11A,PDE4C,PDE7B,PIK3C2A,PIK3CG,PRKAA2,PRKCH,RAPGEF6,RIPK4,ROCK2,RPTOR,SH2B3,SP1,SPTA1,STAB2,STIM1,STING1,TBC1D5,TTC21A,TUBB,VIM,VWF,ZNF366	59
Cancer,Organismal Injury and Abnormalities	Malignant solid organ tumor	3.46E-105	104.461	6.40741e-104	103.193	0.475	AASS,ABCA3,ABCA6,ABCB7,ABCC1,ABCG2,ABI1,ABR,ACBD4,ACBD5,ACE,ACKR3,ACVR2A,ADAMTS10,ADAMTS9,ADAR,ADARB1,ADCK1,ADCY9,ADGRA2,ADGRF5,ADK,ADORA3,ADSS1,AFAP1L1,AFDN,AFF1,AGTPBP1,AHCTF1,AHCYL2,AHNAK2,AHR,AKAP13,AKAP9,AKR1E2,ALDH2,AMIGO3,AMOT,ANKHD1-EIF4EBP3,ANKRD20A4P (includes others),ANKRD23,ANKRD24,ANKRD28,ANKRD33,ANKRD36,ANKS1A,ANO6,APAF1,APBA1,APCDD1,APOD,APP,AR,ARFGEF1,ARFGEF2,ARFGEF3,ARHGAP19,ARHG…	978
Cancer,Gastrointestinal Disease,Organismal Injury and Abnormalities	Digestive system cancer	5.31E-110	109.275	1.23488e-108	107.908	0.464	AASS,ABCA3,ABCA6,ABCB7,ABCC1,ABCG2,ABI1,ABR,ACACA,ACBD4,ACBD5,ACE,ACKR3,ACVR2A,ADAMTS10,ADAMTS9,ADAR,ADARB1,ADCK1,ADCY9,ADGRA2,ADGRF5,ADK,ADORA3,ADRA1D,ADRA2A,ADSS1,AFAP1L1,AFDN,AFF1,AGTPBP1,AHCTF1,AHCYL2,AHNAK2,AHR,AKAP13,AKAP9,ALDH2,AMIGO3,AMOT,ANKHD1-EIF4EBP3,ANKRD20A4P (includes others),ANKRD23,ANKRD24,ANKRD28,ANKRD36,ANKRD65,ANKS1A,ANO6,APAF1,APBA1,APCDD1,APOD,APOLD1,APP,AR,ARFGEF1,ARFGEF2,A…	1124
Cellular Growth and Proliferation	Proliferation of vascular cells	2.87E-08	7.54212	3.5e-08	7.45593	0.457	AHR,AR,BMPR2,CALCRL,CAVIN2,CBL,CCN3,CCR7,CDK6,CMKLR1,DAB2,DGKA,EDNRB,EFNB2,FLI1,FLT1,FOXO1,FRS2,FZD4,GPER1,HGF,HPS5,IGFBP5,IL6,IQGAP1,KDR,MERTK,MTOR,MYOF,NFATC1,NOTCH1,NR3C2,NRP2,PLCG1,PPARG,PRKD2,PTPN11,RCAN2,RGS5,ROCK2,SEMA6A,SMAD4,SP1,SPEN,ST8SIA1,TEK,TNFRSF12A,TNFSF9,VIP,WWP2,WWTR1	51
Hereditary Disorder,Neurological Disease,Organismal Injury and Abnormalities	Familial neurological disorder	3.09E-29	28.51	1.06186e-28	27.9739	0.447	ABCA3,ABCB7,ABCC1,ABI1,ACBD5,ACE,ACKR3,ADAR,ADARB1,ADK,ADRA1D,ADRA2A,AGTPBP1,ALDH2,ANKRD36,ANO6,APOD,APP,AR,ARFGEF1,ARFGEF2,ARHGEF28,ARHGEF6,ARID2,ARSG,ARSL,ASL,ATL1,ATP11A,ATP1A1,ATP6V1A,ATP7A,ATP7B,ATP9A,ATR,BAZ2B,BCAS3,BRCA2,CAMKK2,CASK,CBL,CBLN1,CC2D2A,CCDC88C,CCL5,CD74,CDC14A,CDK19,CDKL5,CDON,CELF2,CEP120,CEP290,CEP295,CFB,CHD4,CHD7,CHM,CHN1,CHRNA7,CLCN3,CLIC2,CLU,CMKLR1,CNOT3,CNTNAP1,COL7A1…	324
Cancer,Gastrointestinal Disease,Organismal Injury and Abnormalities	Colon tumor	3.48E-79	78.4584	3.16364e-78	77.4998	0.445	ABCA3,ABCA6,ABCB7,ABCC1,ACKR3,ACVR2A,ADAMTS9,ADAR,ADARB1,ADCY9,ADGRA2,ADGRF5,ADK,ADORA3,ADRA2A,ADSS1,AFAP1L1,AFDN,AFF1,AHCTF1,AHCYL2,AHNAK2,AHR,AKAP13,AKAP9,ALDH2,AMIGO3,AMOT,ANKHD1-EIF4EBP3,ANKRD20A4P (includes others),ANKRD23,ANKRD24,ANKRD28,ANKRD36,ANKS1A,APAF1,APBA1,APCDD1,APOD,AR,ARFGEF1,ARFGEF3,ARHGAP27,ARHGEF28,ARHGEF6,ARID2,ARID4A,ARL10,ASAP2,ATAD2B,ATE1,ATG2A,ATOSA,ATP10A,ATP11A,ATP13A3,…	691
Cell-mediated Immune Response,Cellular Movement,Hematological System Development and Function,Immune Cell Trafficking	Cell movement of T lymphocytes	1.36E-08	7.86646	1.73028e-08	7.76188	0.443	ACKR3,ADAR,APOD,APP,AR,BCL9,BMPR2,CCL23,CCL5,CCR7,CD74,CMKLR1,CX3CL1,CYSLTR1,DOCK8,DPP4,FOXO1,FOXP1,GATA2,HGF,IL6,IL7,INPP5D,ITGA1,ITGA6,JAK1,KMT2C,LAMA4,LAT,LCP1,MERTK,MTOR,NOTCH1,PIK3CG,PIK3R2,PLCG1,PRKCQ,PRKN,PTGDR2,PTPRB,RGS5,RORA,SATB1,SETD2,STAT1,STING1,TGFBR2,TNFSF4,TNFSF9,TRPV1,VIP	51
Cancer,Organismal Injury and Abnormalities	Intrathoracic malignant tumor	4.72E-56	55.3261	2.63687e-55	54.5789	0.437	AASS,ABCA6,ABCB7,ABCC1,ABCG2,ABR,ACE,ACKR3,ACVR2A,ADAR,ADARB1,ADCY9,ADGRF5,ADORA3,ADRA1D,ADSS1,AFDN,AGTPBP1,AHCTF1,AHNAK2,AHR,AKAP13,AKAP9,AMOT,ANKHD1-EIF4EBP3,ANKRD20A4P (includes others),ANKRD24,ANKRD28,ANKRD33,ANKRD36,ANKS1A,ANO6,APAF1,APBA1,APOD,AR,ARFGEF1,ARFGEF2,ARHGAP28,ARHGEF12,ARHGEF28,ARHGEF6,ARID2,ARRB1,ARSG,ATE1,ATG2A,ATP10A,ATP11A,ATP1A1,ATP7A,ATP7B,ATP9A,ATR,AXIN2,BACE2,BAZ2A,BCAS3,…	677
Cancer,Gastrointestinal Disease,Organismal Injury and Abnormalities	Gastrointestinal carcinoma	1.79E-120	119.747	8.95e-119	118.048	0.436	AASS,ABCA3,ABCA6,ABCB7,ABCC1,ABCG2,ABR,ACBD4,ACBD5,ACE,ACKR3,ACVR2A,ADAMTS10,ADAMTS9,ADAR,ADARB1,ADCK1,ADCY9,ADGRA2,ADGRF5,ADK,ADORA3,ADRA1D,ADRA2A,ADSS1,AFAP1L1,AFDN,AFF1,AGTPBP1,AHCTF1,AHCYL2,AHNAK2,AHR,AKAP13,AKAP9,ALDH2,AMIGO3,AMOT,ANKHD1-EIF4EBP3,ANKRD20A4P (includes others),ANKRD23,ANKRD24,ANKRD28,ANKRD36,ANKRD65,ANKS1A,ANO6,APAF1,APBA1,APCDD1,APOD,APOLD1,APP,AR,ARFGEF1,ARFGEF2,ARFGEF3,ARHG…	1064
Gastrointestinal Disease,Organismal Injury and Abnormalities	Colon lesion	5.54E-80	79.2565	5.08257e-79	78.2939	0.424	ABCA3,ABCA6,ABCB7,ABCC1,ACKR3,ACVR2A,ADAMTS9,ADAR,ADARB1,ADCY9,ADGRA2,ADGRF5,ADK,ADORA3,ADRA2A,ADSS1,AFAP1L1,AFDN,AFF1,AHCTF1,AHCYL2,AHNAK2,AHR,AKAP13,AKAP9,ALDH2,AMIGO3,AMOT,ANKHD1-EIF4EBP3,ANKRD20A4P (includes others),ANKRD23,ANKRD24,ANKRD28,ANKRD36,ANKS1A,APAF1,APBA1,APCDD1,APOD,AR,ARFGEF1,ARFGEF3,ARHGAP27,ARHGEF28,ARHGEF6,ARID2,ARID4A,ARL10,ASAP2,ATAD2B,ATE1,ATG2A,ATOSA,ATP10A,ATP11A,ATP13A3,…	693
Cancer,Gastrointestinal Disease,Hepatic System Disease,Organismal Injury and Abnormalities	Hepatocellular carcinoma	1.63E-21	20.7878	4.86567e-21	20.3129	0.423	ABCA6,ABCG2,ACACA,ADAMTS10,ADAMTS9,ADAR,ADK,ADORA3,ADRA1D,AFDN,AHCTF1,AHNAK2,AKAP13,ALDH2,AMOT,ANKRD36,APAF1,AR,ARHGEF12,ARID2,ARID4A,ASAP1,ATG2A,ATP1A1,ATP9A,AXIN2,BAZ2A,BAZ2B,BCL2L11,BDH1,BICRAL,BIRC6,BMAL1,BMAL2,BMPR2,BRCA2,CCDC150,CCDC80,CD109,CELF1,CEP162,CFAP54,CHM,CNTNAP3B,CPEB3,CRHBP,CRIM1,CRIP1,CSMD2,CUL9,CYP1A1,CYP39A1,DCC,DCHS1,DCLRE1A,DENND4C,DENND5A,DMXL2,DNALI1,DNMBP,DSTYK,E2F8,EDNR…	284
Cellular Response to Therapeutics	Drug resistance of tumor cell lines	3.20E-07	6.49485	3.39343e-07	6.46936	0.409	ABCC1,ABCG2,ACACA,AR,BIRC6,BRCA2,CBL,DCAF7,DOP1B,EEF1B2,EFR3A,EP300,ETS1,EZH2,FBXW11,FOXP1,FST,HECW2,HERC2,HGF,IL7,ITGA6,ITGB4,KIF20B,KLF11,KLF8,MED12,MED16,MTHFD2,NOTCH1,NR2C2,NSD1,PHF8,PIK3C2B,PIK3R2,PRKAA2,PRKDC,RALGAPB,RETSAT,SETD2,SLC12A5,SLCO2B1,STAT1,STING1,STS,TRPV1,TSC1,USP34,VCP,WWTR1,YOD1,ZC3H11A,ZNF432,ZSWIM8	54
Cancer,Organismal Injury and Abnormalities,Reproductive System Disease	Genital tumor	3.69E-101	100.433	4.92e-100	99.308	0.388	AASS,ABCA3,ABCA6,ABCB7,ABCC1,ABCG2,ABI1,ABR,ACE,ACER2,ACVR2A,ADAMTS10,ADAMTS9,ADAR,ADARB1,ADCK1,ADCY9,ADGRA2,ADGRF5,ADK,ADORA3,ADRA1D,ADRA2A,ADSS1,AFDN,AFF1,AGTPBP1,AHCTF1,AHCYL2,AHNAK2,AHR,AKAP13,AKAP9,ALDH2,AMOT,ANKHD1-EIF4EBP3,ANKRD20A4P (includes others),ANKRD23,ANKRD24,ANKRD28,ANKRD36,ANKS1A,ANO6,APBA1,APCDD1,APOD,APOLD1,APP,AR,ARFGEF1,ARFGEF2,ARFGEF3,ARHGAP19,ARHGAP27,ARHGAP28,ARHGEF12,ARHG…	920
Connective Tissue Disorders,Organismal Injury and Abnormalities,Skeletal and Muscular Disorders	Arthralgia/arthritis	2.76E-17	16.5591	7.15026e-17	16.1457	0.387	ABCA6,ABCC1,ABCG2,ACKR3,ADAMTS10,ADAMTS9,ADCY9,ADORA3,ADRA1D,ADRA2A,AHR,AKAP13,ALDH2,ANKRD20A4P (includes others),ANKRD28,ANO6,APAF1,APCDD1,APOD,AR,ARRB1,ASAP1,ASAP2,ATP6V1G2,BCAS3,BCL2L11,BMAL1,BMPR2,BMX,BRME1,CALCRL,CARF,CAST,CCL23,CCL5,CCR7,CD74,CDK5RAP2,CDK6,CFAP54,CFB,CLIC2,CLU,CMKLR1,CPEB4,CSF2RB,CSGALNACT1,CX3CL1,DAB2,DACH1,DAXX,DNAJC16,DOP1B,DPP4,DYNC2H1,EPAS1,ERN1,ETS1,EZH2,FAM8A1,FBXL7,…	207
Connective Tissue Disorders,Inflammatory Disease,Inflammatory Response,Organismal Injury and Abnormalities,Skeletal and Muscular Disorders	Inflammation of joint	5.21E-17	16.2832	1.32234e-16	15.8787	0.387	ABCA6,ABCC1,ABCG2,ACKR3,ADAMTS10,ADAMTS9,ADCY9,ADORA3,ADRA1D,ADRA2A,AHR,AKAP13,ALDH2,ANKRD20A4P (includes others),ANKRD28,ANO6,APAF1,APCDD1,APOD,AR,ARRB1,ASAP1,ASAP2,ATP6V1G2,BCAS3,BCL2L11,BMAL1,BMPR2,BMX,BRME1,CALCRL,CARF,CAST,CCL23,CCL5,CCR7,CD74,CDK5RAP2,CDK6,CFAP54,CFB,CLIC2,CLU,CMKLR1,CPEB4,CSF2RB,CSGALNACT1,CX3CL1,DAB2,DACH1,DAXX,DNAJC16,DPP4,DYNC2H1,EPAS1,ERN1,ETS1,EZH2,FAM8A1,FBXL7,FILIP1…	206
Cancer,Hematological Disease,Immunological Disease,Organismal Injury and Abnormalities	T-cell non-Hodgkin lymphoma	2.56E-18	17.5918	6.91892e-18	17.16	0.378	ADAMTS9,ADAR,ADORA3,AHNAK2,ALDH2,ARID2,AXIN2,BCL2L11,BCL9,BCOR,BIRC6,BRCA2,CAVIN2,CCR7,CELF2,CEP120,CHD6,CLU,CPNE3,CRYBG1,DCC,DCLRE1A,DENND11,DPP4,EFNB2,EP300,EPAS1,ERC1,ETS1,EZH2,FAM171B,FAT4,FGF11,FOXP1,FSIP2,GHR,GTF2I,HDAC6,HDAC9,HGF,HIPK3,HLA-DPB1,HTR1D,IER3,IL18R1,IL6,ITGAX,ITGB4,ITPKB,JAK1,JAM3,JMJD1C,KDR,KIT,KMT2C,LAMB2,LEF1,LIFR,LRRC49,MEGF6,MERTK,MGAT4A,MICB,MKI67,MOAP1,MTOR,MYOF,NCOA3,N…	123
Cardiovascular Disease,Organismal Injury and Abnormalities	Hypertension of blood vessel	1.31E-08	7.88273	1.67092e-08	7.77704	0.367	ABCG2,ADRA1D,ADRA2A,AHR,AR,ATP13A3,BMPR2,BRME1,CCDC80,CCL5,CD34,CMKLR1,CX3CL1,EDNRB,EPAS1,F8,FAM171B,FLT1,FOXO1,GUCY1A1,KDR,KIT,LTBP1,NOTCH1,NPR1,NPR3,NR3C2,PDE11A,PDE4C,PDE7B,PDE9A,PFKFB3,POLA1,PTGDR2,RGS5,RPTOR,SMAD1,SMAD4,TNFSF4,VIP	40
Organismal Injury and Abnormalities,Skeletal and Muscular Disorders	Musculoskeletal lesion	4.46E-31	30.3507	1.61594e-30	29.7916	0.363	ABCA6,ABCC1,ABCG2,ACACA,ACKR3,ACVR2A,ADAMTS10,ADAMTS9,ADARB1,ADCY9,ADORA3,ADRA1D,ADRA2A,AFF1,AHCTF1,AHR,AKAP13,ALDH2,ANKRD20A4P (includes others),ANKRD28,ANO6,APAF1,APCDD1,APOD,APOLD1,AR,ARFGEF2,ARFGEF3,ARRB1,ARSL,ASAP1,ASAP2,ATP2B4,ATP6V1G2,ATP7A,ATR,BCAS3,BCL2L11,BCOR,BDH1,BMAL1,BMPR2,BMX,BRCA2,BRME1,CALCRL,CARF,CAST,CAVIN2,CBL,CC2D2A,CCDC150,CCL23,CCL5,CCR7,CD109,CD34,CD74,CDK5RAP2,CDK6,CELF2,…	359
Molecular Transport,Protein Synthesis,Protein Trafficking	Localization of protein	2.34E-11	10.6308	4.17857e-11	10.379	0.361	AFDN,AHR,AKAP9,AMOT,APP,AR,ASAP1,ATP2B4,ATR,AXIN2,BRME1,CASK,CC2D2A,CDKL5,CEP120,CEP192,CEP290,CIB1,CLIP3,CNTNAP1,DAB2,DAXX,DCHS1,DENND4C,DOC2B,DYNC2H1,EFR3A,EPM2A,EPS15,EZH2,FLT1,FSIP2,GHR,GOLGB1,GPER1,HGF,HSPG2,JAK1,JAM3,JARID2,KIF20B,KIFAP3,LEF1,LRBA,LSR,MDC1,MERTK,MID2,MIOS,MRAP2,MT2A,MTOR,MYCBP2,MYO6,NEDD4L,NIPBL,OTOGL,PALM,PIK3R2,PRKAA2,PRKCH,PRKN,RAB11FIP3,RALGAPA2,RALGAPB,RAPGEF6,RDX,ROCK…	98
Cellular Movement,Hematological System Development and Function,Immune Cell Trafficking	Cellular infiltration by leukocytes	1.43E-09	8.84466	2.0937e-09	8.67908	0.357	ADAR,AHR,APOD,APP,AR,ARRB1,BCL9,BMPR2,CAST,CCL5,CCR7,CD93,CFB,CMKLR1,CSF2RB,CX3CL1,CYSLTR1,DPP4,EPAS1,ERN1,ETS1,FAM171B,FLT1,FOXM1,FOXO6,GATA2,HGF,IFIH1,IL24,IL6,IL7,IRAK3,IRF6,ITGA1,ITGB4,JAK1,JAM3,KDR,KMT2C,LAMA4,MERTK,NF1,NFATC1,NOTCH1,NPR1,NR3C2,PARG,PFKFB3,PIK3CG,PIK3R2,PLCG1,PLD1,PPARG,PRDM1,PREX1,PRKCQ,PRKN,PSMB8,PTGDR2,PTPN11,RGS5,RORA,RPTOR,SATB1,SETD2,SFRP1,SMAD4,SPHK1,SPTLC2,STAT1,STC1…	84
Cancer,Organismal Injury and Abnormalities	Formation of solid tumor	3.54E-131	130.451	9.825e-129	128.008	0.355	AASS,ABCA3,ABCA6,ABCB7,ABCC1,ABCG2,ABI1,ABR,ACACA,ACBD4,ACBD5,ACE,ACER2,ACKR3,ACVR2A,ADAMTS10,ADAMTS9,ADAR,ADARB1,ADCK1,ADCY9,ADGRA2,ADGRF5,ADK,ADORA3,ADRA1D,ADRA2A,ADSS1,AFAP1L1,AFDN,AFF1,AGTPBP1,AHCTF1,AHCYL2,AHNAK2,AHR,AKAP13,AKAP9,AKR1E2,ALDH2,AMIGO3,AMOT,ANKHD1-EIF4EBP3,ANKRD20A4P (includes others),ANKRD23,ANKRD24,ANKRD28,ANKRD33,ANKRD36,ANKRD65,ANKS1A,ANO6,APAF1,APBA1,APCDD1,APOD,APOLD1,APP…	1151
Cancer,Neurological Disease,Organismal Injury and Abnormalities	Primitive neuroectodermal tumor	4.65E-14	13.3325	1.00868e-13	12.9962	0.342	ABCC1,ABCG2,ANKHD1-EIF4EBP3,AR,ARHGAP27,ARID2,ASAP2,BCOR,BRCA2,CCNB1IP1,CDK6,CEP295,CGNL1,CHD7,CLU,CRIM1,CSF2RB,DLGAP4,DOCK8,DROSHA,EP300,EP400,EPB41L4A,EXOC6B,EZH2,FOLH1,FOXM1,FSIP2,HDAC9,HES4,HGF,HLA-DRB1,HSPG2,IDE,IFT172,IL24,KALRN,KMT2A,KMT2C,LAMP3,LENG8,LHX6,LRBA,MDC1,MED23,MERTK,MGA,MMEL1,MRPS18B,MTCL1,NCSTN,NF1,NIPBL,NOTCH1,OAZ1,PCDHGA11,PCDHGB1,PCDHGB6,PCDHGB7,PHC1,PIK3C2B,PLPP3,PRR14L,PT…	85
Cancer,Neurological Disease,Organismal Injury and Abnormalities	Neuroectodermal tumor	2.65E-13	12.5768	5.44148e-13	12.2643	0.342	ABCC1,ABCG2,ANKHD1-EIF4EBP3,AR,ARHGAP27,ARID2,ASAP2,BCOR,BRCA2,CCNB1IP1,CDK6,CEP295,CGNL1,CHD7,CLU,CRIM1,CSF2RB,DLGAP4,DOCK8,DROSHA,EP300,EP400,EPB41L4A,EXOC6B,EZH2,FOLH1,FOXM1,FSIP2,HDAC9,HES4,HGF,HLA-DRB1,HSPG2,IDE,IFT172,IL24,KALRN,KDR,KMT2A,KMT2C,LAMP3,LENG8,LHX6,LRBA,MDC1,MED23,MERTK,MGA,MMEL1,MRPS18B,MTCL1,NCSTN,NF1,NIPBL,NOTCH1,OAZ1,PCDHGA11,PCDHGB1,PCDHGB6,PCDHGB7,PHC1,PIK3C2B,PLPP3,PRR14…	86
Cancer,Organismal Injury and Abnormalities,Reproductive System Disease	Breast adenocarcinoma	8.61E-34	33.065	3.28626e-33	32.4833	0.339	AASS,ACE,ACVR2A,ADCK1,AKAP13,ALDH2,ANKRD36,APAF1,AR,ARFGEF1,ARID2,ARRB1,ATG2A,ATP2B4,ATP7B,ATR,AXIN2,BCL9,BCOR,BMAL2,BMPR2,BMX,BRCA2,CASK,CBL,CCDC180,CCDC88C,CCR7,CD109,CDC14A,CDC42BPA,CDK6,CDK7,CDS2,CEP192,CEP290,CGNL1,CHURC1-FNTB,CIT,COL9A3,CRACD,CRIM1,CRYBG3,CX3CL1,CYSLTR1,DAXX,DCC,DDIAS,DIRAS1,DPP4,DYSF,EHMT2,ELK4,EML4,EP300,EPAS1,EPS15,ERN1,ETFDH,ETV1,EZH2,FANCM,FAT4,FBXW11,FLNB,FMNL2,FMO5,F…	240
Cancer,Neurological Disease,Organismal Injury and Abnormalities	Brain tumor	1.52E-104	103.818	2.62069e-103	102.582	0.336	AASS,ABCA3,ABCA6,ABCB7,ABCC1,ABCG2,ABR,ACBD5,ACE,ACKR3,ACVR2A,ADAMTS10,ADAMTS9,ADAR,ADARB1,ADCK1,ADCY9,ADGRA2,ADGRF5,ADRA1D,ADRA2A,ADSS1,AFAP1L1,AFDN,AFF1,AGTPBP1,AHCTF1,AHNAK2,AHR,AKAP13,AKAP9,AKR1E2,ALDH2,AMIGO3,AMOT,ANKHD1-EIF4EBP3,ANKRD20A4P (includes others),ANKRD23,ANKRD24,ANKRD28,ANKRD36,ANKRD65,ANKS1A,ANO6,APAF1,APBA1,APCDD1,APP,ARFGEF1,ARFGEF2,ARFGEF3,ARHGAP28,ARHGEF28,ARHGEF6,ARID2,ARID…	888
Hematological System Development and Function,Tissue Morphology	Quantity of myeloid cells	5.58E-09	8.25337	7.44e-09	8.12843	0.322	ADORA3,AHR,APP,AR,ARID4A,BCL2L11,BMAL1,BMPR2,BRCA2,C1QL3,CAMKK2,CD34,CDK6,CELF2,CIB1,CLEC11A,CLU,CMKLR1,CSF2RB,CX3CL1,CYP1A1,DAXX,DGKA,DOCK8,DPP4,EP300,EPAS1,EZH2,FLI1,GAB2,GATA2,GHR,HGF,IGF2R,IL6,IL7,INPP5D,IRAK3,IRF6,ITGA2B,ITPKB,JAM3,JARID2,KDR,KIT,KLF13,KMT2A,KMT2E,LAMA4,LCP1,MT2A,MTOR,NBEAL2,NEDD4L,NEIL2,NF1,NPFFR2,NPR1,NPR3,NR2C2,NR3C2,PBX1,PFKFB3,PHF8,PIK3CG,PLCG1,PLXND1,PPARG,PREX1,PRKN,P…	94
Cancer,Organismal Injury and Abnormalities	Soft tissue neoplasm	5.09E-32	31.2933	1.87132e-31	30.7279	0.32	ABCA6,ABCC1,ABCG2,ADAMTS10,ADAR,ADARB1,ADGRF5,AFF1,AGTPBP1,AHCTF1,AHNAK2,AKAP13,AKAP9,AKR1E2,ANKRD23,ANKRD24,ANKRD33,ANKRD36,ANKRD65,ANKS1A,AR,ARFGEF3,ARHGAP19,ARHGEF28,ARID4A,ARSG,ARSL,ASAP1,ASAP2,ATG2A,ATP10A,ATP11A,ATP2B4,ATP7A,ATP7B,ATP9A,ATR,AXIN2,BAZ2B,BCAS3,BCL9,BCOR,BFAR,BIRC6,BMAL2,BRCA2,BRME1,BTBD8,C19orf33,C22orf46P,C2CD2,CAMKK2,CAND2,CAST,CBL,CC2D2A,CCDC144A,CCDC150,CCDC180,CCDC88C,CC…	481
Cancer,Organismal Injury and Abnormalities	Malignant soft tissue neoplasm	4.47E-17	16.3497	1.1374e-16	15.9441	0.32	ADGRF5,AFF1,AGTPBP1,AHCTF1,AHNAK2,AKAP13,ANKRD23,ANKRD33,AR,ARFGEF3,ATP2B4,ATP9A,ATR,AXIN2,BCOR,BRCA2,C22orf46P,C2CD2,CBL,CC2D2A,CCDC150,CD34,CD93,CDK6,CEP170,CHD4,CHD7,CSF2RB,CSMD2,DACH1,DAXX,DOCK6,DOCK8,DOP1B,DYNC2H1,ECPAS,EIF4G3,EML6,EPM2A,EPS15,ETV1,EZH2,FANCB,FAT4,FILIP1,FLT1,FOXM1,FOXO1,FSIP2,GABRP,GATAD2B,GPER1,GPRIN3,GRAMD1A,GSE1,HECW2,HERC1,HGF,HLA-C,HMGCS1,HRCT1,HSPG2,HTR1B,INPP5D,IRAG1…	175
Cancer,Organismal Injury and Abnormalities	Soft tissue sarcoma	1.32E-14	13.8794	2.9932e-14	13.5239	0.32	AFF1,AHCTF1,AHNAK2,AKAP13,AR,ARFGEF3,ATP2B4,ATR,AXIN2,BCOR,BRCA2,C22orf46P,CBL,CC2D2A,CCDC150,CD34,CDK6,CHD4,CSF2RB,CSMD2,DACH1,DAXX,DOCK6,DOP1B,EIF4G3,EPM2A,EPS15,ETV1,EZH2,FILIP1,FLT1,FOXM1,FOXO1,GABRP,GPER1,GPRIN3,GSE1,HECW2,HERC1,HGF,HMGCS1,HRCT1,HSPG2,HTR1B,INPP5D,IRAG1,IRF6,ITPR3,JPH2,KATNAL2,KDM3B,KDR,KIAA1549L,KIF20B,KIT,KMT2C,LONRF2,LPIN1,LPL,MACF1,MDC1,MED12,MED16,MEGF6,MEGF9,MERTK,MIOS…	125
Cancer,Organismal Injury and Abnormalities	Breast or colorectal cancer	4.80E-83	82.3188	5.05263e-82	81.2965	0.318	AASS,ABCA3,ABCA6,ABCB7,ABCC1,ABCG2,ABR,ACACA,ACBD5,ACE,ACKR3,ACVR2A,ADAMTS10,ADAMTS9,ADAR,ADARB1,ADCK1,ADCY9,ADGRA2,ADGRF5,ADK,ADORA3,ADRA1D,ADRA2A,ADSS1,AFAP1L1,AFDN,AFF1,AGTPBP1,AHCTF1,AHCYL2,AHNAK2,AHR,AKAP13,AKAP9,ALDH2,AMIGO3,AMOT,ANKHD1-EIF4EBP3,ANKRD20A4P (includes others),ANKRD23,ANKRD24,ANKRD28,ANKRD36,ANKS1A,APAF1,APBA1,APCDD1,APOD,APP,AR,ARFGEF1,ARFGEF3,ARHGAP19,ARHGAP27,ARHGEF12,ARHGE…	886
Cancer,Organismal Injury and Abnormalities	Neoplasia of epithelial cells	9.65E-48	47.0155	4.57346e-47	46.3398	0.314	ABCA6,ABCC1,ABCG2,ACE,ACVR2A,ADAMTS10,ADAR,ADARB1,ADCY9,AFDN,AFF1,AHCTF1,AHNAK2,AHR,AKAP13,AKAP9,ALDH2,ANKHD1-EIF4EBP3,ANKRD20A4P (includes others),ANKRD24,ANKRD36,ANKRD65,ANO6,APBA1,APCDD1,APOD,APP,AR,ARFGEF3,ARHGAP28,ARHGEF12,ARID2,ARID4A,ARSG,ASAP1,ASAP2,ASL,ATAD2B,ATAT1,ATG2A,ATP10A,ATP11A,ATP13A3,ATP1A1,ATP6V1A,ATP7A,ATP7B,ATR,AXIN2,BAZ2A,BAZ2B,BCL9,BCOR,BIRC6,BOC,BRCA2,BTBD3,BTBD8,C2CD2,C2o…	577
Immunological Disease,Organismal Injury and Abnormalities	Systemic autoimmune syndrome	6.25E-16	15.2041	1.50602e-15	14.8222	0.304	ABR,ADAR,ADARB1,ADRA2A,AFF1,AHNAK2,AHR,ALDH2,ANKS1A,AR,ARHGEF12,ARHGEF6,ARRB1,ASAP1,ATP1A1,ATP6V1G2,BACE2,BCL2L11,BMAL1,BMX,BRME1,CALCRL,CAST,CBL,CCL23,CCL5,CCR7,CD74,CDK5RAP2,CDK6,CDS2,CFB,CHD7,CLEC16A,CLIC2,CLU,CMKLR1,CRIP1,CSF2RB,CSGALNACT1,CX3CL1,DAB2,DAXX,DPP4,EDA,EPAS1,ETS1,EZH2,F8,FAM120B,FBXL7,FCHSD2,FCMR,FIP1L1,FLI1,FLT1,FOXO1,FOXP1,GABRP,GALNT6,GHR,GPC5,GPER1,GRAMD1A,GTF2I,GTF3C1,HDAC6,…	218
Organismal Injury and Abnormalities	Side effect	3.32E-07	6.47886	3.51323e-07	6.45429	0.283	ABCC1,ABCG2,ACE,ADRA1D,ADRA2A,AHR,APOD,APP,AR,ARHGEF12,BCL2L11,BCL9,CD74,CDK6,CELF2,CTDSPL,EDNRB,ERN1,ETS1,FBXL7,GABRP,HLA-DPB1,IL6,KDR,KIFAP3,LDLRAD4,LRBA,MT-CO1,MT2A,MTOR,NAV2,NR3C2,OPRL1,PDE11A,PDE4C,PDE7B,PLCB1,PPARG,ST6GAL1,STAB2,STON1,TOP2B,TRPV1,ZBTB16	44
Cancer,Organismal Injury and Abnormalities,Reproductive System Disease	Prostate cancer	1.05E-66	65.9788	7.39437e-66	65.1311	0.277	ABCA3,ABCC1,ABCG2,ABR,ACVR2A,ADAR,ADCY9,ADGRA2,ADRA1D,ADRA2A,ADSS1,AFF1,AHCTF1,AHNAK2,AKAP13,AKAP9,ALDH2,ANKHD1-EIF4EBP3,ANKRD20A4P (includes others),ANKRD23,ANKRD36,ANO6,APBA1,APOD,APOLD1,AR,ARFGEF2,ARFGEF3,ARHGAP28,ARHGEF12,ARID2,ARRDC3,ASAP2,ATAT1,ATE1,ATG2A,ATOSA,ATP11A,ATP1A1,ATP2B4,ATP6V1A,ATR,AXIN2,BAZ2A,BAZ2B,BCAS3,BCL2L11,BCL9,BDH1,BICRAL,BIRC6,BMPR2,BMX,BRCA2,BRME1,C8orf82,CALCRL,CARF,C…	570
Cancer,Organismal Injury and Abnormalities,Reproductive System Disease	Malignant neoplasm of male genital organ	1.37E-65	64.8633	9.25676e-65	64.0335	0.277	ABCA3,ABCC1,ABCG2,ABR,ACVR2A,ADAR,ADCY9,ADGRA2,ADRA1D,ADRA2A,ADSS1,AFF1,AHCTF1,AHNAK2,AKAP13,AKAP9,ALDH2,ANKHD1-EIF4EBP3,ANKRD20A4P (includes others),ANKRD23,ANKRD36,ANO6,APBA1,APOD,APOLD1,AR,ARFGEF2,ARFGEF3,ARHGAP28,ARHGEF12,ARID2,ARRDC3,ASAP2,ATAT1,ATE1,ATG2A,ATOSA,ATP11A,ATP1A1,ATP2B4,ATP6V1A,ATR,AXIN2,BAZ2A,BAZ2B,BCAS3,BCL2L11,BCL9,BDH1,BICRAL,BIRC6,BMPR2,BMX,BRCA2,BRME1,C8orf82,CALCRL,CARF,C…	574
Cellular Assembly and Organization	Organization of organelle	2.72E-08	7.56543	3.32518e-08	7.47818	0.266	AGTPBP1,APP,ARFGEF1,ARFGEF2,ARHGEF28,ARID4A,ARSG,ATL1,ATP7A,ATR,BACE2,BAZ2A,BOC,BRCA2,C1QL3,CBLN1,CCDC88C,CECR2,CEP170,CGNL1,CIB1,CIT,CNTNAP1,DAXX,DOP1B,DYNC2H1,DYSF,EFNB2,EP300,EPAS1,EPHA4,EPM2A,EPS15,EZH2,FAM161A,FAT4,FNBP1L,GHR,GOLGB1,HDAC6,HDAC9,HGF,HPS1,HPS3,HPS5,IFT172,IRAG2,ITGA8,ITGB4,KLHL24,LAMB2,LAMC1,LCP1,LIMA1,LPIN1,LYST,MACF1,MECOM,MKI67,MLLT3,MLLT6,MTOR,MTSS1,MYOF,NF1,NFRKB,NUP93,OT…	100
Organismal Development	Growth of vessel	3.16E-08	7.50031	3.83495e-08	7.41624	0.257	ACKR3,ADGRA2,AHR,AR,BMPR2,CALCRL,CCN3,CDK6,CMKLR1,CRIM1,CX3CL1,EDNRB,EFNB2,FLT1,FOXM1,FOXO1,GPER1,GUCY1A1,HDAC6,HDAC9,HGF,HPS5,IGFBP5,IL6,JAM2,JAM3,KDR,KIT,MKI67,MTOR,NF1,NFATC1,NOTCH1,NR3C2,PPARG,PTPN11,ROCK2,SMAD4,SP1,ST8SIA1,STAT1,STIM1,TGFBR2,TNFSF9,VIP,WWP2	46
Cancer,Organismal Injury and Abnormalities	Urogenital cancer	1.06E-103	102.975	1.58209e-102	101.801	0.255	AASS,ABCA3,ABCA6,ABCB7,ABCC1,ABCG2,ABI1,ABR,ACACA,ACBD5,ACE,ACER2,ACVR2A,ADAMTS10,ADAMTS9,ADAR,ADARB1,ADCK1,ADCY9,ADGRA2,ADGRF5,ADK,ADORA3,ADRA1D,ADRA2A,ADSS1,AFDN,AFF1,AGTPBP1,AHCTF1,AHCYL2,AHNAK2,AHR,AKAP13,AKAP9,AKR1E2,ALDH2,AMOT,ANKHD1-EIF4EBP3,ANKRD20A4P (includes others),ANKRD23,ANKRD24,ANKRD28,ANKRD33,ANKRD36,ANKS1A,ANO6,APAF1,APBA1,APCDD1,APOD,APOLD1,APP,AR,ARFGEF1,ARFGEF2,ARFGEF3,ARHGAP1…	1051
Cancer,Organismal Injury and Abnormalities	Malignant genitourinary solid tumor	2.68E-103	102.572	3.88406e-102	101.411	0.255	AASS,ABCA3,ABCA6,ABCB7,ABCC1,ABCG2,ABI1,ABR,ACBD5,ACE,ACER2,ACVR2A,ADAMTS10,ADAMTS9,ADAR,ADARB1,ADCK1,ADCY9,ADGRA2,ADGRF5,ADK,ADORA3,ADRA1D,ADRA2A,ADSS1,AFDN,AFF1,AGTPBP1,AHCTF1,AHCYL2,AHNAK2,AHR,AKAP13,AKAP9,AKR1E2,ALDH2,AMOT,ANKHD1-EIF4EBP3,ANKRD20A4P (includes others),ANKRD23,ANKRD24,ANKRD28,ANKRD33,ANKRD36,ANKS1A,ANO6,APAF1,APBA1,APCDD1,APOD,APOLD1,APP,AR,ARFGEF1,ARFGEF2,ARFGEF3,ARHGAP19,ARHG…	1050
Organismal Injury and Abnormalities,Skeletal and Muscular Disorders	Abnormal morphology of muscle	4.42E-09	8.35458	5.99729e-09	8.22205	0.247	ABI1,ADK,AHR,AKAP13,AR,ATE1,BMX,CALCRL,CAST,CDK7,CLIP3,CLU,DPP4,DYSF,EP300,ETV1,FOXM1,FOXP1,FST,GMPPA,HDAC9,HEY2,HGF,HSPG2,IER3,IGF2R,IL6,IL7,INHBB,INPP5D,JARID2,JPH2,KALRN,LAMA4,LPL,LTBP1,MAP2K6,MBNL1,MLIP,MRTFB,MTOR,MYCBP2,MYOF,NF1,NOTCH1,NPR1,PDE9A,PLCB1,PLD1,PLXND1,PPARG,PRKAA2,PTPN11,RAB11FIP3,RCAN2,ROCK2,RPS6KA2,RPTOR,RRAD,SHC1,SMAD4,SOX7,SPTBN1,TGFBR2,TGFBR3,VAV3	66
Cancer,Organismal Injury and Abnormalities	Nonhematologic malignant neoplasm	1.92E-119	118.717	8.72727e-118	117.059	0.243	AASS,ABCA3,ABCA6,ABCB7,ABCC1,ABCG2,ABI1,ABR,ACACA,ACBD4,ACBD5,ACE,ACER2,ACKR3,ACVR2A,ADAMTS10,ADAMTS9,ADAR,ADARB1,ADCK1,ADCY9,ADGRA2,ADGRF5,ADK,ADORA3,ADRA1D,ADRA2A,ADSS1,AFAP1L1,AFDN,AFF1,AGTPBP1,AHCTF1,AHCYL2,AHNAK2,AHR,AKAP13,AKAP9,AKR1E2,ALDH2,AMIGO3,AMOT,ANKHD1-EIF4EBP3,ANKRD20A4P (includes others),ANKRD23,ANKRD24,ANKRD28,ANKRD33,ANKRD36,ANKRD65,ANKS1A,ANO6,APAF1,APBA1,APCDD1,APOD,APOLD1,APP…	1197
Cancer,Dermatological Diseases and Conditions,Organismal Injury and Abnormalities	Skin tumor	1.39E-105	104.857	2.67308e-104	103.573	0.243	AASS,ABCA3,ABCA6,ABCB7,ABCC1,ABCG2,ABI1,ABR,ACBD4,ACBD5,ACE,ACKR3,ACVR2A,ADAMTS10,ADAMTS9,ADAR,ADARB1,ADCK1,ADCY9,ADGRA2,ADGRF5,ADK,ADORA3,ADSS1,AFAP1L1,AFDN,AFF1,AGTPBP1,AHCTF1,AHCYL2,AHNAK2,AHR,AKAP13,AKAP9,AKR1E2,ALDH2,AMIGO3,AMOT,ANKHD1-EIF4EBP3,ANKRD20A4P (includes others),ANKRD23,ANKRD24,ANKRD28,ANKRD33,ANKRD36,ANKS1A,ANO6,APAF1,APBA1,APCDD1,APOD,APP,AR,ARFGEF1,ARFGEF2,ARFGEF3,ARHGAP19,ARHG…	975
Cancer,Organismal Injury and Abnormalities,Reproductive System Disease	Prostatic intraepithelial tumor	5.51E-10	9.25885	8.56921e-10	9.06706	0.243	ANO6,AR,CD74,CFB,CLU,COL7A1,CX3CL1,DACH1,ETV1,FOXM1,HGF,IER3,ITGA6,ITGB4,KRT7,MYO1C,PEAK1,PPARG,RCAN2,SFN,SPRY1,TFF3,TOP2B,VAV3,VCAN,ZNF827	26
Cancer,Organismal Injury and Abnormalities,Reproductive System Disease	Genital tract cancer	1.31E-101	100.883	1.81944e-100	99.7401	0.239	AASS,ABCA3,ABCA6,ABCB7,ABCC1,ABCG2,ABI1,ABR,ACE,ACER2,ACVR2A,ADAMTS10,ADAMTS9,ADAR,ADCK1,ADCY9,ADGRA2,ADGRF5,ADORA3,ADRA1D,ADRA2A,ADSS1,AFDN,AFF1,AGTPBP1,AHCTF1,AHCYL2,AHNAK2,AHR,AKAP13,AKAP9,ALDH2,AMOT,ANKHD1-EIF4EBP3,ANKRD20A4P (includes others),ANKRD23,ANKRD24,ANKRD28,ANKRD36,ANKS1A,ANO6,APBA1,APCDD1,APOD,APOLD1,APP,AR,ARFGEF1,ARFGEF2,ARFGEF3,ARHGAP19,ARHGAP27,ARHGAP28,ARHGEF12,ARHGEF28,ARHGEF…	911
Cancer,Organismal Injury and Abnormalities	Anogenital cancer	1.51E-101	100.821	2.06849e-100	99.6843	0.239	AASS,ABCA3,ABCA6,ABCB7,ABCC1,ABCG2,ABI1,ABR,ACE,ACER2,ACVR2A,ADAMTS10,ADAMTS9,ADAR,ADCK1,ADCY9,ADGRA2,ADGRF5,ADORA3,ADRA1D,ADRA2A,ADSS1,AFDN,AFF1,AGTPBP1,AHCTF1,AHCYL2,AHNAK2,AHR,AKAP13,AKAP9,ALDH2,AMOT,ANKHD1-EIF4EBP3,ANKRD20A4P (includes others),ANKRD23,ANKRD24,ANKRD28,ANKRD36,ANKS1A,ANO6,APBA1,APCDD1,APOD,APOLD1,APP,AR,ARFGEF1,ARFGEF2,ARFGEF3,ARHGAP19,ARHGAP27,ARHGAP28,ARHGEF12,ARHGEF28,ARHGEF…	912
Cancer,Organismal Injury and Abnormalities	Pelvic cancer	9.61E-101	100.017	1.23205e-99	98.9094	0.239	AASS,ABCA3,ABCA6,ABCB7,ABCC1,ABCG2,ABI1,ABR,ACBD5,ACE,ACER2,ACVR2A,ADAMTS10,ADAMTS9,ADAR,ADARB1,ADCK1,ADCY9,ADGRA2,ADGRF5,ADORA3,ADRA1D,ADRA2A,ADSS1,AFDN,AFF1,AGTPBP1,AHCTF1,AHCYL2,AHNAK2,AHR,AKAP13,AKAP9,AKR1E2,ALDH2,AMOT,ANKHD1-EIF4EBP3,ANKRD20A4P (includes others),ANKRD23,ANKRD24,ANKRD28,ANKRD33,ANKRD36,ANKS1A,ANO6,APAF1,APBA1,APCDD1,APOD,APOLD1,APP,AR,ARFGEF1,ARFGEF2,ARFGEF3,ARHGAP19,ARHGAP27…	989
Cancer,Organismal Injury and Abnormalities,Reproductive System Disease	Male genital neoplasm	2.89E-66	65.5391	1.9931e-65	64.7005	0.232	ABCA3,ABCC1,ABCG2,ABR,ACVR2A,ADAR,ADCY9,ADGRA2,ADRA1D,ADRA2A,ADSS1,AFF1,AHCTF1,AHNAK2,AKAP13,AKAP9,ALDH2,ANKHD1-EIF4EBP3,ANKRD20A4P (includes others),ANKRD23,ANKRD36,ANO6,APBA1,APOD,APOLD1,AR,ARFGEF2,ARFGEF3,ARHGAP28,ARHGEF12,ARID2,ARRDC3,ASAP2,ATAT1,ATE1,ATG2A,ATOSA,ATP11A,ATP1A1,ATP2B4,ATP6V1A,ATR,AXIN2,BAZ2A,BAZ2B,BCAS3,BCL2L11,BCL9,BDH1,BICRAL,BIRC6,BMPR2,BMX,BRCA2,BRME1,C8orf82,CALCRL,CARF,C…	581
Cell Cycle	Mitosis	6.01E-07	6.22113	6.07685e-07	6.21632	0.225	AHR,ANKS1A,APAF1,APP,AR,ARRB1,ATE1,ATR,BRCA2,CBL,CCNB1IP1,CDC14A,CDK19,CEP192,CHD4,CHD7,CIT,CUL9,CYSLTR1,EIF6,EP400,FBXL7,FLT1,FOXM1,HGF,HSPA1A,IGFBP5,IL6,IL7,INPP5D,IQGAP1,JARID2,KDR,KIT,KMT2A,KMT2E,LEF1,MKI67,MTOR,MYO1C,NEK9,NFIA,NFIB,NIPBL,NUP98,PLCG1,POGZ,PTPN11,REST,SETDB2,SFRP1,SHC1,SHROOM2,SKA1,SMAD4,SPHK1,STARD9,STAT1,TGFBR2,TNC,TOP2B,TTC28,TUBB,UBD,UBE2S,VAV3,VCAN,VIP	68
Organismal Injury and Abnormalities	Acute disease	2.76E-57	56.5591	1.60465e-56	55.7946	0.221	ABCA6,ABCC1,ABCG2,ACACA,ACBD5,ACE,ACER2,ADAMTS9,ADAR,ADARB1,ADGRA2,ADGRF5,ADK,ADORA3,ADRA1D,ADRA2A,ADSS1,AFDN,AFF1,AHCYL2,AHNAK2,AHR,AKAP13,AKAP9,ALDH2,AMOT,ANKHD1-EIF4EBP3,ANKRD20A4P (includes others),ANKRD24,ANKRD28,ANKRD33,ANKRD36,ANKS1A,APCDD1,APP,AR,ARFGEF1,ARFGEF3,ARHGAP28,ARHGEF28,ARHGEF6,ARID2,ARID4A,ARSL,ASAP2,ATF6B,ATL1,ATP10A,ATP11A,ATP13A3,ATP1A1,ATP2B4,ATP6V1A,ATR,AXIN2,BAZ2B,BCAS3,B…	525
Cancer,Organismal Injury and Abnormalities,Renal and Urological Disease	Development of renal tumor	1.40E-27	26.8539	4.69799e-27	26.3281	0.218	ACVR2A,ADGRF5,ADORA3,ADSS1,AFDN,AKAP9,ALDH2,ANKRD36,APOD,APP,AR,ARFGEF3,ARID2,ASAP1,ATF7,ATP13A3,ATR,AXIN2,BFAR,BRCA2,BRME1,C2CD2,C2orf81,CALCRL,CCDC150,CCDC80,CCL5,CDK5RAP2,CDK6,CEP170,CEP20,CGNL1,CHURC1-FNTB,CIT,CLDN7,CLIP3,CLOCK,CLU,COL7A1,CRACD,CREBRF,CRYBG1,CSF2RB,CTDSPL,CUL9,CX3CL1,CYP1A1,DACH1,DCAF11,DCLRE1A,DENND5A,DIRAS1,DNAJC16,DNALI1,DNMBP,DOCK8,DOP1A,E2F8,EEF1B2,EP300,EP400,EPAS1,ETS1…	253
Inflammatory Response,Organismal Injury and Abnormalities,Respiratory Disease	Inflammation of respiratory system component	3.94E-11	10.4045	6.87609e-11	10.1627	0.217	ABCC1,ACE,ADAMTS9,ADCY9,ADORA3,ADRA1D,ADRA2A,ADSS1,AHR,ALDH2,AR,BCL2L11,CBL,CCL5,CCR7,CHD4,CHD7,CHRNA7,CLCN3,CLEC16A,CMKLR1,CSF2RB,CYSLTR1,DPP4,DYNC2H1,ERMP1,EZH2,FBXL7,FLI1,FLT1,FMNL2,FOXP1,GABRP,GALNT18,GPANK1,GPER1,HERC2,HIVEP1,HLA-DPB1,HLA-DRB1,HSPG2,HTR1B,HTR1D,IDE,IFIH1,IL18R1,IL6,IRAG1,IRAK3,ITGA8,ITPKB,ITPR3,ITSN2,JAK1,JMJD1C,KCNN3,KCTD12,KDR,KIT,KMT2C,KRT7,LAMC1,LAT,LCP1,LIFR,LRBA,LRRC49…	130
Cancer,Organismal Injury and Abnormalities	Glandular intraepithelial neoplasm	1.87E-10	9.72816	3.0456e-10	9.51633	0.216	ANKRD20A4P (includes others),ANO6,AR,ARHGAP28,CD74,CFB,CLU,CMKLR1,COL7A1,CX3CL1,DACH1,ETV1,FOXM1,FRAS1,GBP4,HECW2,HGF,HLA-C,IER3,ITGA6,ITGB4,KIAA1549L,KRT7,MYO1C,MYO5C,NUP98,PCDHGA11,PCDHGB1,PCDHGB6,PCDHGB7,PEAK1,PIK3CG,PPARG,PRUNE1,RCAN2,SFN,SMAD4,SPRY1,TFF3,THOC2,TOP2B,TRPV1,VAV3,VCAN,WDFY3,ZMIZ1,ZNF154,ZNF208,ZNF827	49
Cancer,Organismal Injury and Abnormalities	Intraepithelial neoplasm	6.06E-10	9.21753	9.3808e-10	9.02776	0.216	ACE,ANKRD20A4P (includes others),ANKRD36,ANO6,AR,ARHGAP28,ARID2,C2orf81,CD74,CFB,CLU,CMKLR1,COL7A1,CX3CL1,DACH1,ETV1,FOXM1,FRAS1,GBP4,GTF2H4,HECW2,HGF,HLA-C,IER3,ITGA6,ITGB4,KIAA1549L,KMT2C,KRT7,MYO1C,MYO5C,NOTCH1,NUP98,OAS3,PCDHB6,PCDHGA11,PCDHGB1,PCDHGB6,PCDHGB7,PEAK1,PIK3CG,PPARG,PRUNE1,RCAN2,SFN,SHC1,SLC23A2,SLC25A3,SMAD4,SPRY1,TFF3,THOC2,TOP2B,TRPV1,VAV3,VCAN,WDFY3,ZMIZ1,ZNF154,ZNF208,ZNF827	61
Cellular Response to Therapeutics	Drug resistance of cells	5.03E-07	6.29843	5.16427e-07	6.28699	0.206	ABCC1,ABCG2,ACACA,AR,ATP13A3,BIRC6,BRCA2,CBL,DCAF7,DOP1B,EEF1B2,EFR3A,EP300,ETS1,EZH2,FBXW11,FOXP1,FST,HECW2,HERC2,HGF,IGF2R,IL7,ITGA6,ITGB4,KIF20B,KLF11,KLF8,MED12,MED16,MTHFD2,NOTCH1,NR2C2,NSD1,PHF8,PIK3C2B,PIK3R2,PRKAA2,PRKDC,RALGAPB,RETSAT,SETD2,SLC12A5,SLCO2B1,STAT1,STING1,STS,TRPV1,TSC1,USP34,VCP,WWTR1,YOD1,ZC3H11A,ZNF432,ZSWIM8	56
Developmental Disorder,Neurological Disease,Organismal Injury and Abnormalities	Demyelination	2.02E-09	8.69465	2.88571e-09	8.53975	0.196	ABCG2,ADRA1D,ADRA2A,AFF1,AHR,APP,ARHGEF6,ARRB1,ASAP1,ATF6B,ATP1A1,ATP7A,CCL5,CD109,CLEC16A,CPEB3,CSF2RB,CYSLTR1,DOCK8,EHMT2,ETS1,FOXP1,GABRP,GPC5,GTF2H4,HLA-DRB1,IGF2R,IL18R1,IL6,IL7,IQGAP1,ITGB4,ITPR3,JAK1,KCND1,KCNIP1,KCNJ12,KCNQ1,KIT,LAT,LEF1,LPIN1,LRBA,LYST,MERTK,MGAT5B,MICB,MIDEAS,MMEL1,MPHOSPH9,MT-CO1,MT-CO2,MT-ND6,NCOA3,NLRC5,NOTCH1,OAS3,PHACTR2,POLA1,PPARG,PRKCQ,PRKN,PSMB8,PTPN11,RFXANK,R…	81
Inflammatory Disease,Inflammatory Response,Organismal Injury and Abnormalities,Respiratory Disease	Inflammation of airway	1.20E-09	8.92082	1.78042e-09	8.74948	0.193	ABCC1,ADAMTS9,ADCY9,ADORA3,ADRA1D,ADRA2A,ADSS1,AHR,ALDH2,AR,BCL2L11,CCL5,CHD4,CHRNA7,CLCN3,CLEC16A,CMKLR1,CYSLTR1,DPP4,DYNC2H1,ERMP1,EZH2,FBXL7,FLT1,FMNL2,FOXP1,GALNT18,GPANK1,HERC2,HIVEP1,HLA-DPB1,HLA-DRB1,HSPG2,HTR1B,HTR1D,IL18R1,IL6,IRAG1,IRAK3,ITGA8,ITPKB,ITPR3,ITSN2,JMJD1C,KCTD12,KDR,KIT,KRT7,LAMC1,LCP1,LIFR,LRRC49,MAGI1,MECOM,MICB,MKI67,MT-CO1,NEDD4L,NSD1,OAS2,OFD1,PBX2,PDE11A,PDE4C,PDE7B,P…	101
Cancer,Gastrointestinal Disease,Organismal Injury and Abnormalities	Hepato-pancreato-biliary cancer	5.44E-77	76.2644	4.61017e-76	75.3363	0.189	AASS,ABCA3,ABCA6,ABCC1,ABCG2,ABI1,ABR,ACACA,ACE,ACKR3,ACVR2A,ADAMTS10,ADAMTS9,ADAR,ADARB1,ADCK1,ADK,ADORA3,ADRA1D,ADRA2A,AFAP1L1,AFDN,AFF1,AGTPBP1,AHCTF1,AHNAK2,AHR,AKAP13,AKAP9,ALDH2,AMOT,ANKHD1-EIF4EBP3,ANKRD20A4P (includes others),ANKRD24,ANKRD36,ANKS1A,ANO6,APAF1,APBA1,APP,AR,ARFGEF1,ARFGEF2,ARFGEF3,ARHGAP27,ARHGEF12,ARHGEF28,ARHGEF6,ARID2,ARID4A,ARRB1,ARSG,ARSL,ASAP1,ASAP2,ATAT1,ATE1,ATG2A,A…	802
Cancer,Hematological Disease,Immunological Disease,Organismal Injury and Abnormalities	T-cell leukemia	3.63E-09	8.44009	5.0069e-09	8.30043	0.186	ADORA3,AHCTF1,AHNAK2,ANKRD36,ARHGEF6,ATR,BCOR,BRCA2,CCDC144A,CCR7,CCSER2,CD34,CDON,CEP162,CEP170,CHM,CHRFAM7A,CNTNAP3B,CRACD,CRAMP1,CSF2RB,DMXL2,DNMBP,DOCK6,DOP1A,DYSF,EBF1,EIF4G3,EOGT,EP300,EP400,EPB41L4A,EZH2,FANCM,FAT4,FOLH1,FRAS1,FSIP2,GARRE1,GATA2,GOLGA8A,GPER1,GSE1,GTF2I,HDAC6,HERC2,HSPG2,INPP5D,IQGAP1,ITGB4,JAK1,JARID2,JMJD1C,KCNN3,KIAA0040,KIT,KMT2A,KMT2C,LAT,LEF1,LYST,MACF1,MAML3,MARF1,M…	97
Immunological Disease,Organismal Injury and Abnormalities	Allergy	1.93E-08	7.71444	2.39454e-08	7.62078	0.18	ACACA,ADORA3,ADRA1D,ADRA2A,AFF1,AHR,ALDH2,AR,ARSG,CCL23,CCL5,CD74,CHD4,CHM,CLEC16A,CMKLR1,CSF2RB,CSGALNACT1,CYSLTR1,DYRK4,EFHC1,EFR3A,ENTREP1,EPS15,ERMP1,ETS1,EZH2,FOXO1,FOXP1,GAB2,GATAD2B,HLA-C,HLA-DPB1,HLA-DRB1,HLA-F,HMGCS1,IDE,IL18R1,IL6,IL7,INPP5D,IQGAP1,ITGA6,ITPKB,ITPR3,JAK1,KCNIP1,KIT,LAT,LPIN1,LPL,MICB,MKI67,MMEL1,MTOR,NAV1,NCAM2,NCR3LG1,NFIA,NONOP2,PDE11A,PDE4C,PDE7B,PIK3C2B,PIK3CG,POMC,…	94
Organismal Injury and Abnormalities	Hypertrophy of tissue	7.90E-08	7.10237	9.18605e-08	7.03687	0.179	ADK,AHR,APAF1,AR,BMX,CAST,CDK7,DPP4,EP300,FLNB,FOXM1,FST,HDAC9,HEY2,HGF,HSPG2,IER3,IGF2R,IGFBP5,IL6,IL7,JARID2,JPH2,MAP2K6,MLIP,MTOR,NOTCH1,NPR1,PBX1,PDE9A,PLCB1,PLD1,PPARG,PRKAA2,PTPN11,RAB11FIP3,ROCK2,RPS6KA2,RPTOR,RRAD,SHC1,SMAD1,SMAD4,STC1,TGFBR2,TGFBR3	46
Cancer,Gastrointestinal Disease,Organismal Injury and Abnormalities	Large intestine neoplasm	1.55E-117	116.81	5.96154e-116	115.225	0.175	AASS,ABCA3,ABCA6,ABCB7,ABCC1,ABCG2,ABR,ACACA,ACBD5,ACE,ACKR3,ACVR2A,ADAMTS10,ADAMTS9,ADAR,ADARB1,ADCK1,ADCY9,ADGRA2,ADGRF5,ADK,ADORA3,ADRA1D,ADRA2A,ADSS1,AFAP1L1,AFDN,AFF1,AGTPBP1,AHCTF1,AHCYL2,AHNAK2,AHR,AKAP13,AKAP9,ALDH2,AMIGO3,AMOT,ANKHD1-EIF4EBP3,ANKRD20A4P (includes others),ANKRD23,ANKRD24,ANKRD28,ANKRD36,ANKRD65,ANKS1A,ANO6,APAF1,APBA1,APCDD1,APOD,APOLD1,APP,AR,ARFGEF1,ARFGEF2,ARFGEF3,ARHG…	1048
Cancer,Gastrointestinal Disease,Organismal Injury and Abnormalities	Colorectal tumor	1.32E-78	77.8794	1.15789e-77	76.9363	0.175	AASS,ABCA3,ABCA6,ABCB7,ABCC1,ABCG2,ACACA,ACBD5,ACKR3,ACVR2A,ADAMTS9,ADAR,ADARB1,ADCY9,ADGRA2,ADGRF5,ADK,ADORA3,ADRA1D,ADRA2A,ADSS1,AFAP1L1,AFDN,AFF1,AGTPBP1,AHCTF1,AHCYL2,AHNAK2,AHR,AKAP13,AKAP9,ALDH2,AMIGO3,AMOT,ANKHD1-EIF4EBP3,ANKRD20A4P (includes others),ANKRD23,ANKRD24,ANKRD28,ANKRD36,ANKS1A,APAF1,APBA1,APCDD1,APOD,AR,ARFGEF1,ARFGEF3,ARHGAP27,ARHGEF28,ARHGEF6,ARID2,ARID4A,ARL10,ARSL,ASAP2,ATA…	773
Gastrointestinal Disease,Organismal Injury and Abnormalities	Colorectal lesion	5.97E-79	78.224	5.37838e-78	77.2693	0.17	AASS,ABCA3,ABCA6,ABCB7,ABCC1,ABCG2,ACACA,ACBD5,ACKR3,ACVR2A,ADAMTS9,ADAR,ADARB1,ADCY9,ADGRA2,ADGRF5,ADK,ADORA3,ADRA1D,ADRA2A,ADSS1,AFAP1L1,AFDN,AFF1,AGTPBP1,AHCTF1,AHCYL2,AHNAK2,AHR,AKAP13,AKAP9,ALDH2,AMIGO3,AMOT,ANKHD1-EIF4EBP3,ANKRD20A4P (includes others),ANKRD23,ANKRD24,ANKRD28,ANKRD36,ANKS1A,APAF1,APBA1,APCDD1,APOD,AR,ARFGEF1,ARFGEF3,ARHGAP27,ARHGEF28,ARHGEF6,ARID2,ARID4A,ARL10,ARSL,ASAP2,ATA…	774
Cell Morphology,Organismal Injury and Abnormalities	Hypertrophy of cells	1.34E-07	6.8729	1.50731e-07	6.8218	0.165	ADK,AHR,APP,AR,BMX,CAST,CDK7,CMKLR1,DPP4,EP300,EPAS1,FLNB,FOXM1,FOXO1,FST,HDAC9,HEY2,HGF,HSPG2,IER3,IGF2R,IL6,IL7,JARID2,JPH2,MAP2K6,MLIP,MTOR,NOTCH1,NPR1,PBX1,PDE9A,PIK3CG,PLCB1,PLD1,PPARG,PRKAA2,PTPN11,RAB11FIP3,ROCK2,RPS6KA2,RPTOR,RRAD,SHC1,SMAD1,SMAD4,STC1,TGFBR2,TGFBR3	49
Skeletal and Muscular System Development and Function	Quantity of bone	6.48E-07	6.18842	6.49299e-07	6.18756	0.165	ACACA,AHR,APP,BMAL1,BMPR2,CLEC11A,CNOT3,EBF1,FST,GAB2,GATA2,GHR,HERC1,HTR1B,IFIH1,IGFBP5,INPP5D,IRAK3,JAM2,MLLT3,NOTCH1,NPFFR2,NPR3,PIK3CG,PLCG1,PLEKHM1,PPARG,PRDM1,PTPN11,RASSF2,RPTOR,SFRP1,SPHK1,STAT1,TEK,TGFBR2,TNFRSF11A,TSC22D3,WWTR1,ZBTB16	40
Cancer,Hematological Disease,Immunological Disease,Organismal Injury and Abnormalities	Lymphocytic leukemia	4.58E-22	21.3391	1.38788e-21	20.8576	0.164	ACE,ADAMTS9,ADGRA2,ADORA3,ADRA1D,AFF1,AHCTF1,AHNAK2,AMOT,ANKRD36,ANKS1A,APP,AR,ARHGEF6,ARID2,ATP10A,ATP11A,ATP13A3,ATR,BAZ2A,BCL2L11,BCOR,BMAL2,BRCA2,BRME1,CBL,CCDC144A,CCDC180,CCR7,CCSER2,CD34,CD74,CDC14A,CDON,CEP162,CEP170,CHD4,CHM,CHRFAM7A,CNTNAP1,CNTNAP3B,COL7A1,CRACD,CRAMP1,CSF2RB,CUL9,CYP1A1,DCAF11,DCHS1,DCLRE1A,DMXL2,DNMBP,DOC2B,DOCK6,DOCK9,DOP1A,DOP1B,DPP4,DUSP23,DYSF,E2F8,EBF1,EHMT2,EIF4…	244
Cardiovascular Disease,Organismal Injury and Abnormalities,Respiratory Disease	Pulmonary vascular disease	2.97E-08	7.52724	3.61754e-08	7.44159	0.164	ABCG2,ADRA1D,ADRA2A,AHR,AR,ATP13A3,BMPR2,BRME1,CCDC80,CCL5,CMKLR1,CX3CL1,EDNRB,EP300,EPAS1,F8,FAM171B,FLT1,FOXO1,IL6,KDR,KIT,LTBP1,MAGI1,MERTK,NOTCH1,NPR1,NPR3,NR3C2,PDE11A,PDE4C,PDE7B,PDE9A,PFKFB3,PHC1,PTGDR2,RGS5,RPTOR,SMAD1,SMAD4,TNFSF4,VIP,VWF	43
Cancer,Gastrointestinal Disease,Hepatic System Disease,Organismal Injury and Abnormalities	Hepatobiliary system cancer	5.60E-65	64.2518	3.70861e-64	63.4308	0.162	AASS,ABCA3,ABCA6,ABCC1,ABCG2,ABI1,ACACA,ACE,ACKR3,ACVR2A,ADAMTS10,ADAMTS9,ADAR,ADARB1,ADCK1,ADK,ADORA3,ADRA1D,ADRA2A,AFAP1L1,AFDN,AFF1,AGTPBP1,AHCTF1,AHNAK2,AHR,AKAP13,AKAP9,ALDH2,AMOT,ANKHD1-EIF4EBP3,ANKRD20A4P (includes others),ANKRD24,ANKRD36,ANKS1A,ANO6,APAF1,APBA1,AR,ARFGEF1,ARFGEF2,ARFGEF3,ARHGAP27,ARHGEF12,ARHGEF28,ARID2,ARID4A,ARRB1,ARSG,ARSL,ASAP1,ASAP2,ATAT1,ATE1,ATG2A,ATL1,ATP10A,ATP11…	694
Cancer,Gastrointestinal Disease,Organismal Injury and Abnormalities	Malignant hepatobiliary neoplasm	5.60E-65	64.2518	3.70861e-64	63.4308	0.162	AASS,ABCA3,ABCA6,ABCC1,ABCG2,ABI1,ACACA,ACE,ACKR3,ACVR2A,ADAMTS10,ADAMTS9,ADAR,ADARB1,ADCK1,ADK,ADORA3,ADRA1D,ADRA2A,AFAP1L1,AFDN,AFF1,AGTPBP1,AHCTF1,AHNAK2,AHR,AKAP13,AKAP9,ALDH2,AMOT,ANKHD1-EIF4EBP3,ANKRD20A4P (includes others),ANKRD24,ANKRD36,ANKS1A,ANO6,APAF1,APBA1,AR,ARFGEF1,ARFGEF2,ARFGEF3,ARHGAP27,ARHGEF12,ARHGEF28,ARID2,ARID4A,ARRB1,ARSG,ARSL,ASAP1,ASAP2,ATAT1,ATE1,ATG2A,ATL1,ATP10A,ATP11…	694
Cellular Development	Differentiation of leukemia cell lines	3.42E-08	7.46597	4.13043e-08	7.384	0.15	CBL,CDK6,CSF2RB,CTDSPL,CX3CL1,DRAM2,EPAS1,EZH2,FLI1,GATA2,GSE1,IL24,IL6,INPP5D,KAT2B,KIT,KMT2A,KSR2,LIFR,MAP2K6,MCC,NOTCH1,PRKAR2B,RBFOX2,RUNX1T1,SCIN,SHC1,ST8SIA1,STAT1,STIM1	30
Cancer,Organismal Injury and Abnormalities	Carcinoma	5.74E-123	122.241	4.1e-121	120.387	0.14	AASS,ABCA3,ABCA6,ABCB7,ABCC1,ABCG2,ABI1,ABR,ACACA,ACBD4,ACBD5,ACE,ACER2,ACKR3,ACVR2A,ADAMTS10,ADAMTS9,ADAR,ADARB1,ADCK1,ADCY9,ADGRA2,ADGRF5,ADK,ADORA3,ADRA1D,ADRA2A,ADSS1,AFAP1L1,AFDN,AFF1,AGTPBP1,AHCTF1,AHCYL2,AHNAK2,AHR,AKAP13,AKAP9,AKR1E2,ALDH2,AMIGO3,AMOT,ANKHD1-EIF4EBP3,ANKRD20A4P (includes others),ANKRD23,ANKRD24,ANKRD28,ANKRD33,ANKRD36,ANKRD65,ANKS1A,ANO6,APAF1,APBA1,APCDD1,APOD,APOLD1,APP…	1194
Organismal Injury and Abnormalities,Tissue Morphology	Quantity of lesion	6.58E-09	8.18177	8.68074e-09	8.06144	0.138	AHR,APP,ARID2,ATP1A1,ATP9A,AXIN2,BCL2L11,BMAL1,BMPR2,BRCA2,CBL,CCL5,COL7A1,CX3CL1,DCC,DROSHA,EDNRB,EFNB2,ELK4,EP300,EZH2,FANCM,FOXM1,FOXO1,GNMT,HIP1,IFIH1,IGF2R,IL6,IQGAP1,ITPKB,KCNJ5,KDR,KIT,LEF1,LYST,MAP3K1,MCC,MT-ND6,MTOR,NEDD9,NF1,NOTCH1,NRIP1,PIK3R2,PLCG1,PPARG,PRKN,PTPN11,RASAL2,SLC30A3,SMAD4,SPEN,SPHK1,ST8SIA1,STAT1,TGFBR2,TNC,TNFRSF12A,TOP2B,TP53BP1,TRPV1,TSC1,VIP	64
Cancer,Immunological Disease,Organismal Injury and Abnormalities	Neoplasia of lymphoid organ	3.12E-07	6.50585	3.31915e-07	6.47897	0.132	ADAMTS9,CCR7,CDK6,CLU,CX3CL1,EFNB2,EP300,EPAS1,EZH2,FGF11,FLT1,GTF2I,HDAC6,HDAC9,HIP1,HLA-C,HLA-DPB1,IL24,IL6,ITGAX,KATNAL2,KDR,KIT,KMT2C,LAMB2,LIFR,MERTK,MGAT5B,MKI67,MT-CO1,MTOR,NEDD4L,NFATC1,NOTCH1,PCDH17,PCDHGB1,PCDHGB6,PIK3CG,PLCG1,POLA1,PRKDC,PTPN11,RASSF9,RCSD1,REL,ROCK2,SETD2,SMARCA1,SPEN,SPHK1,STING1,TEK,TOP2B,TXNDC12,VIM,WWP2	56
Cancer,Organismal Injury and Abnormalities	Non-hematological solid tumor	1.31E-117	116.883	5.24e-116	115.281	0.129	AASS,ABCA3,ABCA6,ABCB7,ABCC1,ABCG2,ABI1,ABR,ACACA,ACBD4,ACBD5,ACE,ACER2,ACKR3,ACVR2A,ADAMTS10,ADAMTS9,ADAR,ADARB1,ADCK1,ADCY9,ADGRA2,ADGRF5,ADK,ADORA3,ADRA1D,ADRA2A,ADSS1,AFAP1L1,AFDN,AFF1,AGTPBP1,AHCTF1,AHCYL2,AHNAK2,AHR,AKAP13,AKAP9,AKR1E2,ALDH2,AMIGO3,AMOT,ANKHD1-EIF4EBP3,ANKRD20A4P (includes others),ANKRD23,ANKRD24,ANKRD28,ANKRD33,ANKRD36,ANKRD65,ANKS1A,ANO6,APAF1,APBA1,APCDD1,APOD,APOLD1,APP…	1199
Cancer,Organismal Injury and Abnormalities	Head and neck cancer	3.93E-131	130.406	9.825e-129	128.008	0.128	ABCA3,ABCA6,ABCB7,ABCC1,ABCG2,ABI1,ABR,ACBD5,ACE,ACER2,ACVR2A,ADAMTS10,ADAMTS9,ADAR,ADARB1,ADCK1,ADCY9,ADGRA2,ADGRF5,ADORA3,ADRA1D,ADRA2A,ADSS1,AFAP1L1,AFDN,AFF1,AGTPBP1,AHCTF1,AHCYL2,AHNAK2,AHR,AKAP13,AKAP9,AKR1E2,ALDH2,AMIGO3,AMOT,ANKHD1-EIF4EBP3,ANKRD20A4P (includes others),ANKRD23,ANKRD24,ANKRD28,ANKRD33,ANKRD36,ANKRD65,ANKS1A,ANO6,APAF1,APBA1,APCDD1,APOD,APP,AR,ARFGEF1,ARFGEF2,ARFGEF3,ARHGAP…	1091
Cancer,Organismal Injury and Abnormalities	Non-central nervous system malignant neoplasm	1.34E-107	106.873	2.79167e-106	105.554	0.128	AASS,ABCA3,ABCA6,ABCB7,ABCC1,ABCG2,ABI1,ABR,ACACA,ACBD4,ACBD5,ACE,ACER2,ACKR3,ACVR2A,ADAMTS10,ADAMTS9,ADAR,ADARB1,ADCK1,ADCY9,ADGRA2,ADGRF5,ADK,ADORA3,ADRA1D,ADRA2A,ADSS1,AFAP1L1,AFDN,AFF1,AGTPBP1,AHCTF1,AHCYL2,AHNAK2,AHR,AKAP13,AKAP9,AKR1E2,ALDH2,AMIGO3,AMOT,ANKHD1-EIF4EBP3,ANKRD20A4P (includes others),ANKRD23,ANKRD24,ANKRD28,ANKRD33,ANKRD36,ANKRD65,ANKS1A,ANO6,APAF1,APBA1,APCDD1,APOD,APOLD1,APP…	1202
Cardiovascular System Development and Function,Hematological System Development and Function	Blood pressure	3.03E-07	6.51856	3.22684e-07	6.49122	0.12	ABCC1,ACE,ADORA3,ADRA1D,ADRA2A,AHR,ALDH2,APP,AR,ARHGEF12,ATP1A1,ATP2B4,BMAL1,BMPR2,CFB,CMKLR1,CNOT3,EDNRB,EPAS1,FLT1,FOLH1,FOXO1,GHR,GPER1,GUCY1A1,IER3,IL6,IRAG1,KCNQ1,KLHL3,MAML1,NEDD4L,NPR1,NPR3,NR3C2,OPRL1,PLD1,POMC,PPARG,PRKAA2,RGS5,RORA,RPTOR,SCNN1G,SNTB2,SPTLC2,STC1,TEK,TRPV1,VAV3,VIP	51
Cancer,Organismal Injury and Abnormalities	Benign head and neck neoplasm	8.35E-09	8.07831	1.0915e-08	7.96197	0.114	ABCG2,AHNAK2,AHR,ALDH2,APP,BMAL2,CBL,CCDC80,CD177,CHD6,CIT,CRIP1,CSF2RB,DAB2,DAXX,DROSHA,EPHA4,EZH2,FLRT2,FST,FXYD6,GABRP,GUCY1A1,HEY2,HMCN1,HMGCS1,IER3,ITGB4,ITGBL1,LYPD5,MACF1,MAP3K1,MEGF9,MGA,MRAP2,MTOR,NAV1,NF1,NFIB,NR2C2,NR3C2,NRIP1,NUAK1,OTOGL,PCDH12,PHC1,PHLDA1,PIK3CG,PLA1A,PLCB4,POMC,PRDM2,PTPRM,PXDN,RGL1,RGS5,RRAGD,SCNN1B,SDC2,SLC16A9,SLC25A3,SLC7A8,SMAD4,SOX7,SPTA1,STX1A,TFAP2A,TIPARP,T…	74
Cell Cycle,Gene Expression	Binding of DNA	1.26E-09	8.89963	1.85841e-09	8.73086	0.11	AHR,APP,AR,ATF6B,ATF7,BAZ2A,BMX,BRCA2,CLU,CYP1A1,DAB2,EBF1,EP300,EPAS1,ETS1,EZH2,FLI1,FOXM1,FOXO1,FOXP1,GATA2,GATAD2B,GHR,HBP1,HEY2,HGF,HIF3A,HSPA1A,IER3,IL24,IL6,IL7,INPP5D,ITGA2,JAK1,KAT2B,KDR,KLF13,LEF1,LPL,MAML1,MAP2K6,MAP3K1,MGA,NF1,NOTCH1,NPR1,NR2C2,NR3C2,NR5A2,PBX1,PIK3CG,PLCG1,POMC,PPARG,PRDM1,PRKCQ,PRKDC,PTPN11,RANBP2,REL,RXRB,SMAD1,SMAD4,SP1,STAT1,TFAP2A,TFF3,TRPS1,TSC22D3,VIP,ZBTB10	72
Cancer,Organismal Injury and Abnormalities	Malignant solid tumor	4.63E-106	105.334	9.07843e-105	104.042	0.107	AASS,ABCA3,ABCA6,ABCB7,ABCC1,ABCG2,ABI1,ABR,ACACA,ACBD4,ACBD5,ACE,ACER2,ACKR3,ACVR2A,ADAMTS10,ADAMTS9,ADAR,ADARB1,ADCK1,ADCY9,ADGRA2,ADGRF5,ADK,ADORA3,ADRA1D,ADRA2A,ADSS1,AFAP1L1,AFDN,AFF1,AGTPBP1,AHCTF1,AHCYL2,AHNAK2,AHR,AKAP13,AKAP9,AKR1E2,ALDH2,AMIGO3,AMOT,ANKHD1-EIF4EBP3,ANKRD20A4P (includes others),ANKRD23,ANKRD24,ANKRD28,ANKRD33,ANKRD36,ANKRD65,ANKS1A,ANO6,APAF1,APBA1,APCDD1,APOD,APOLD1,APP…	1201
Cancer,Gastrointestinal Disease,Organismal Injury and Abnormalities	Colon cancer	9.29E-78	77.032	8.00862e-77	76.0964	0.104	ABCA3,ABCA6,ABCB7,ABCC1,ACKR3,ACVR2A,ADAMTS9,ADAR,ADARB1,ADCY9,ADGRA2,ADGRF5,ADK,ADORA3,ADRA2A,ADSS1,AFAP1L1,AFDN,AFF1,AHCTF1,AHCYL2,AHNAK2,AHR,AKAP13,AKAP9,ALDH2,AMIGO3,AMOT,ANKHD1-EIF4EBP3,ANKRD20A4P (includes others),ANKRD23,ANKRD24,ANKRD28,ANKRD36,ANKS1A,APAF1,APBA1,APCDD1,APOD,AR,ARFGEF1,ARFGEF3,ARHGAP27,ARHGEF28,ARHGEF6,ARID2,ARID4A,ARL10,ASAP2,ATAD2B,ATE1,ATG2A,ATOSA,ATP10A,ATP11A,ATP13A3,…	682
Cancer,Organismal Injury and Abnormalities	Breast or gastric cancer	8.49E-71	70.0711	6.68504e-70	69.1749	0.104	AASS,ABCA6,ABCB7,ABCC1,ABCG2,ABR,ACBD4,ACBD5,ACE,ACVR2A,ADAMTS10,ADAMTS9,ADAR,ADARB1,ADCK1,ADCY9,ADGRA2,ADGRF5,ADK,ADORA3,ADRA1D,ADRA2A,ADSS1,AFAP1L1,AFDN,AFF1,AGTPBP1,AHCTF1,AHCYL2,AHNAK2,AKAP13,AKAP9,ALDH2,AMOT,ANKRD20A4P (includes others),ANKRD23,ANKRD24,ANKRD28,ANKRD36,ANKRD65,ANKS1A,APAF1,APBA1,APOD,APP,AR,ARFGEF1,ARHGAP19,ARHGAP27,ARHGAP28,ARHGEF12,ARHGEF6,ARID2,ARID4A,ARRB1,ASAP1,ASAP2,ASL…	765
Cardiovascular Disease,Organismal Injury and Abnormalities,Respiratory Disease	Pulmonary hypertension	2.16E-08	7.66555	2.65683e-08	7.57564	0.08	ABCG2,ADRA1D,ADRA2A,AHR,AR,ATP13A3,BMPR2,BRME1,CCDC80,CCL5,CMKLR1,CX3CL1,EDNRB,EPAS1,F8,FAM171B,FLT1,FOXO1,KDR,KIT,LTBP1,NOTCH1,NPR1,NPR3,NR3C2,PDE11A,PDE4C,PDE7B,PDE9A,PFKFB3,PTGDR2,RGS5,RPTOR,SMAD1,SMAD4,TNFSF4,VIP	37
Neurological Disease,Organismal Injury and Abnormalities	Cognitive impairment	1.85E-31	30.7328	6.75182e-31	30.1706	0.07	ABCA3,ACE,ADARB1,ADK,ADORA3,ADRA1D,ADRA2A,ADSS1,ALDH2,AMOT,ANKS1A,APOD,APP,AR,ARFGEF2,ARHGEF6,ARID2,ARRB1,ARSG,ARSL,ATP1A1,ATP6V1A,ATP7A,ATP9A,ATR,BCAS3,BCL9,BIRC6,BRCA2,CAMKK2,CARF,CASK,CC2D2A,CDKL5,CEP290,CHD4,CHRNA7,CIT,CLIC2,CMKLR1,CNOT3,CPEB3,CREBRF,CSGALNACT1,CX3CL1,DCAF11,DCC,DOCK6,DOCK8,DPP4,DYNC2H1,EEF1B2,EP300,EPM2A,ERC1,FAT4,FMO5,FOXO6,FOXP1,GABRP,GATAD2B,GGNBP2,GHR,GMPPA,GPER1,HDAC6,H…	200
Organismal Injury and Abnormalities,Renal and Urological Disease	Formation of renal lesion	9.55E-28	27.02	3.21549e-27	26.4928	0.068	ACVR2A,ADGRF5,ADORA3,ADSS1,AFDN,AKAP9,ALDH2,ANKRD36,APOD,APP,AR,ARFGEF3,ARID2,ASAP1,ATF7,ATP13A3,ATR,AXIN2,BFAR,BRCA2,BRME1,C2CD2,C2orf81,CALCRL,CCDC150,CCDC80,CCL5,CDK5RAP2,CDK6,CEP170,CEP20,CGNL1,CHURC1-FNTB,CIT,CLDN7,CLIP3,CLOCK,CLU,COL7A1,CRACD,CREBRF,CRYBG1,CSF2RB,CTDSPL,CUL9,CX3CL1,CYP1A1,DACH1,DCAF11,DCLRE1A,DENND5A,DIRAS1,DNAJC16,DNALI1,DNMBP,DOCK8,DOP1A,E2F8,EEF1B2,EP300,EP400,EPAS1,ETS1…	254
Cell Morphology,Organismal Injury and Abnormalities,Skeletal and Muscular Disorders	Muscular hypertrophy	7.18E-08	7.14388	8.39766e-08	7.07584	0.061	ADK,AHR,AR,BMX,CAST,CDK7,DPP4,EP300,FOXM1,FST,HDAC9,HEY2,HGF,IER3,IGF2R,IL6,IL7,JARID2,JPH2,MAP2K6,MLIP,MTOR,NOTCH1,NPR1,PDE9A,PLCB1,PLD1,PRKAA2,PTPN11,RAB11FIP3,ROCK2,RPS6KA2,RPTOR,RRAD,SHC1,SMAD4,TGFBR2,TGFBR3	38
Cardiovascular Disease,Organismal Injury and Abnormalities	Vascular lesion	2.80E-10	9.55284	4.48718e-10	9.34803	0.054	ABCA3,ABCA6,ACE,ACKR3,ADAMTS10,ADGRF5,AHR,AKAP13,ALDH2,APP,AR,C1QL3,CAST,CCDC80,CCL5,CCR7,CDK6,CSMD2,CX3CL1,EFNB2,FLT1,FOXO1,FRAS1,GALNT15,GUCY1A1,HDAC9,HERC1,HGF,HRCT1,HSPG2,IER3,IL6,ITGA2B,JMJD1C,KDR,LAMB2,LAMC1,LPL,MCF2L,MRTFB,MYEOV,NAV2,NCOA3,NF1,NID1,NOTCH1,NPR3,NR3C2,OLFML2A,PIK3C2A,PIK3CG,PKP4,PLCG1,PLEKHJ1,POLA1,PPARG,PRDM2,PREX1,PRKCH,PRKCQ,PRKD2,PRKDC,RORA,SHC1,SLC30A3,SMAD4,STAT1,STING…	79
Cancer,Organismal Injury and Abnormalities	Genitourinary carcinoma	1.19E-107	106.924	2.53191e-106	105.597	0.048	AASS,ABCA3,ABCA6,ABCB7,ABCC1,ABCG2,ABI1,ABR,ACBD5,ACE,ACER2,ACVR2A,ADAMTS10,ADAMTS9,ADAR,ADARB1,ADCK1,ADCY9,ADGRA2,ADGRF5,ADORA3,ADRA1D,ADSS1,AFDN,AFF1,AGTPBP1,AHCTF1,AHCYL2,AHNAK2,AHR,AKAP13,AKAP9,AKR1E2,ALDH2,AMOT,ANKHD1-EIF4EBP3,ANKRD20A4P (includes others),ANKRD23,ANKRD24,ANKRD28,ANKRD33,ANKRD36,ANKS1A,ANO6,APAF1,APBA1,APCDD1,APOD,APOLD1,APP,AR,ARFGEF1,ARFGEF2,ARFGEF3,ARHGAP19,ARHGAP27,ARHGAP…	1020
Cancer,Hematological Disease,Immunological Disease,Organismal Injury and Abnormalities	T-cell malignant neoplasm	1.10E-24	23.9586	3.53698e-24	23.4514	0.044	ADAMTS9,ADAR,ADORA3,AFDN,AHCTF1,AHNAK2,ALDH2,ANKRD36,ARHGAP27,ARHGEF6,ARID2,ARID4A,ARSL,ATR,AXIN2,BCL2L11,BCL9,BCOR,BIRC6,BRCA2,CAND2,CAVIN2,CCDC144A,CCDC88C,CCR7,CCSER2,CD34,CDON,CELF2,CEP120,CEP162,CEP170,CHD4,CHD6,CHM,CHRFAM7A,CLU,CNOT3,CNTNAP3B,CPNE3,CRACD,CRAMP1,CRYBG1,CSF2RB,CUL9,DCC,DCLRE1A,DENND11,DENND2C,DMXL2,DNMBP,DOCK6,DOCK8,DOP1A,DPP4,DYSF,EBF1,EDEM3,EFNB2,EIF4G3,EOGT,EP300,EP400,EPA…	231
Cancer,Gastrointestinal Disease,Hepatic System Disease,Organismal Injury and Abnormalities	Liver cancer	2.44E-61	60.6126	1.4878e-60	59.8275	0.033	AASS,ABCA3,ABCA6,ABCC1,ABCG2,ACACA,ACE,ACKR3,ACVR2A,ADAMTS10,ADAMTS9,ADAR,ADARB1,ADCK1,ADK,ADORA3,ADRA1D,ADRA2A,AFAP1L1,AFDN,AFF1,AGTPBP1,AHCTF1,AHNAK2,AHR,AKAP13,AKAP9,ALDH2,AMOT,ANKHD1-EIF4EBP3,ANKRD24,ANKRD36,ANO6,APAF1,APBA1,AR,ARFGEF1,ARFGEF2,ARFGEF3,ARHGAP27,ARHGEF12,ARHGEF28,ARID2,ARID4A,ARRB1,ARSG,ARSL,ASAP1,ASAP2,ATAT1,ATE1,ATG2A,ATL1,ATP10A,ATP11A,ATP1A1,ATP7A,ATP9A,ATR,AXIN2,BAZ2A,BAZ2…	652
Neurological Disease,Organismal Injury and Abnormalities	Progressive neurological disorder	2.25E-13	12.6478	4.63918e-13	12.3336	0.033	ABCC1,ABCG2,ACE,ADAR,ADORA3,ADRA1D,ADRA2A,AFF1,AHR,ALDH2,APBA1,APOD,APP,AR,ARFGEF2,ARHGAP27,ARHGEF28,ARRB1,ARSG,ASAP1,ATF6B,ATG2A,ATP11A,ATP1A1,ATP6V1G2,ATR,BACE2,BCAS3,BCL2L11,BEND4,C8orf44-SGK3,CBL,CBLN1,CC2D2A,CD109,CD34,CD74,CDON,CELF1,CELF2,CEP170,CFAP54,CFB,CHD7,CHRNA7,CIB1,CLCN3,CLEC16A,CLU,CPEB3,CSF2RB,CX3CL1,CYP39A1,CYSLTR1,DAB2,DACH1,DCAF7,DCC,DOCK8,DOCK9,DPP4,DYSF,EHMT2,EML6,EPHA4,EPM2…	263
Neurological Disease,Organismal Injury and Abnormalities	Intracranial lesion	9.26E-105	104.033	1.65357e-103	102.782	0.03	AASS,ABCA3,ABCA6,ABCB7,ABCC1,ABCG2,ABR,ACBD5,ACE,ACKR3,ACVR2A,ADAMTS10,ADAMTS9,ADAR,ADARB1,ADCK1,ADCY9,ADGRA2,ADGRF5,ADRA1D,ADRA2A,ADSS1,AFAP1L1,AFDN,AFF1,AGTPBP1,AHCTF1,AHNAK2,AHR,AKAP13,AKAP9,AKR1E2,ALDH2,AMIGO3,AMOT,ANKHD1-EIF4EBP3,ANKRD20A4P (includes others),ANKRD23,ANKRD24,ANKRD28,ANKRD36,ANKRD65,ANKS1A,ANO6,APAF1,APBA1,APCDD1,APP,ARFGEF1,ARFGEF2,ARFGEF3,ARHGAP28,ARHGEF28,ARHGEF6,ARID2,ARID…	890
Cell Cycle,Gene Expression	Binding of protein binding site	6.78E-10	9.16877	1.04308e-09	8.98168	0.027	AHR,APP,AR,BMX,EBF1,EP300,EPAS1,ETS1,EZH2,FLI1,FOXO1,GHR,HEY2,HGF,HSPA1A,IER3,IL24,IL6,IL7,INPP5D,ITGA2,JAK1,KLF13,LEF1,MAML1,MAP2K6,MAP3K1,NOTCH1,NPR1,NR5A2,PBX1,PIK3CG,POMC,PPARG,PRKCQ,PRKDC,PTPN11,REL,SMAD1,SMAD4,SP1,STAT1,TFAP2A,TFF3,VIP	45
Cardiovascular Disease,Hematological Disease,Organismal Injury and Abnormalities	Thrombus	4.34E-07	6.36251	4.50207e-07	6.34659	0.02	ABCC1,ACACA,ACKR3,AHR,ANO6,APP,AR,BMPR2,CD93,CEP290,CFB,DACH1,DOCK8,EDNRB,EPB41L4B,F8,FOLH1,HIVEP1,HRCT1,IL6,INPP5D,IQGAP2,ITGA2B,ITPR3,JMJD1C,KALRN,KDR,KIFAP3,LAT,LPL,MCF2L,MERTK,MPHOSPH9,NAV2,NCAM2,NR3C2,PDE11A,PDE4C,PDE7B,PIK3C2A,PIK3CG,PRKAA2,PRKCH,RAPGEF6,RIPK4,ROCK2,RPTOR,SH2B3,SP1,SPTA1,STAB2,STIM1,STING1,TBC1D5,TTC21A,TUBB,VWF,ZNF366	58
Organismal Injury and Abnormalities,Respiratory Disease	Lung lesion	3.70E-59	58.4318	2.24242e-58	57.6493	0.015	AASS,ABCA3,ABCA6,ABCB7,ABCC1,ABCG2,ABR,ACE,ACKR3,ACVR2A,ADAR,ADARB1,ADCY9,ADGRF5,ADORA3,ADRA1D,ADSS1,AFDN,AFF1,AGTPBP1,AHCTF1,AHNAK2,AHR,AKAP13,AKAP9,ALDH2,AMOT,ANKHD1-EIF4EBP3,ANKRD20A4P (includes others),ANKRD24,ANKRD28,ANKRD33,ANKRD36,ANKS1A,ANO6,APAF1,APBA1,APOD,AR,ARFGEF1,ARFGEF2,ARHGAP28,ARHGEF12,ARHGEF28,ARHGEF6,ARID2,ARRB1,ARSG,ATE1,ATG2A,ATP10A,ATP11A,ATP1A1,ATP2B4,ATP7A,ATP7B,ATP9A,ATR,…	711
Cell Morphology	Enlargement of cells	2.31E-08	7.63639	2.83784e-08	7.54701	0.012	ADK,AHR,ANO6,APP,AR,BMX,CAST,CDK7,CMKLR1,DPP4,EP300,EPAS1,FLNB,FOXM1,FOXO1,FST,GHR,HDAC9,HEY2,HGF,HSPG2,IER3,IGF2R,IL6,IL7,JARID2,JPH2,LIMA1,LPIN1,MAP2K6,MLIP,MT-ND6,MT2A,MTOR,NOTCH1,NPR1,OSTM1,PBX1,PDE9A,PIK3CG,PLCB1,PLD1,PPARG,PRKAA2,PRKCH,PRKN,PTPN11,RAB11FIP3,ROCK2,RPS6KA2,RPTOR,RRAD,SHC1,SMAD1,SMAD4,STC1,TGFBR2,TGFBR3,TOR1AIP2	59
Cancer,Gastrointestinal Disease,Organismal Injury and Abnormalities	Large intestine adenocarcinoma	3.86E-125	124.413	4.28889e-123	122.368	0	AASS,ABCA3,ABCA6,ABCB7,ABCC1,ABCG2,ABR,ACBD5,ACE,ACKR3,ACVR2A,ADAMTS10,ADAMTS9,ADAR,ADARB1,ADCK1,ADCY9,ADGRA2,ADGRF5,ADK,ADRA1D,ADRA2A,ADSS1,AFAP1L1,AFDN,AFF1,AGTPBP1,AHCTF1,AHCYL2,AHNAK2,AHR,AKAP13,AKAP9,ALDH2,AMIGO3,AMOT,ANKHD1-EIF4EBP3,ANKRD20A4P (includes others),ANKRD23,ANKRD24,ANKRD28,ANKRD36,ANKRD65,ANKS1A,ANO6,APAF1,APBA1,APCDD1,APOD,APOLD1,APP,AR,ARFGEF1,ARFGEF2,ARFGEF3,ARHGAP19,ARHGAP27…	1020
Cancer,Gastrointestinal Disease,Organismal Injury and Abnormalities	Gastrointestinal adenocarcinoma	4.93E-125	124.307	4.93e-123	122.307	0	AASS,ABCA3,ABCA6,ABCB7,ABCC1,ABCG2,ABR,ACBD4,ACBD5,ACE,ACKR3,ACVR2A,ADAMTS10,ADAMTS9,ADAR,ADARB1,ADCK1,ADCY9,ADGRA2,ADGRF5,ADK,ADRA1D,ADRA2A,ADSS1,AFAP1L1,AFDN,AFF1,AGTPBP1,AHCTF1,AHCYL2,AHNAK2,AHR,AKAP13,AKAP9,ALDH2,AMIGO3,AMOT,ANKHD1-EIF4EBP3,ANKRD20A4P (includes others),ANKRD23,ANKRD24,ANKRD28,ANKRD36,ANKRD65,ANKS1A,ANO6,APAF1,APBA1,APCDD1,APOD,APOLD1,APP,AR,ARFGEF1,ARFGEF2,ARFGEF3,ARHGAP19,AR…	1041
Cancer,Organismal Injury and Abnormalities	Head and neck carcinoma	2.92E-123	122.535	2.24615e-121	120.649	0	ABCA3,ABCA6,ABCB7,ABCC1,ABCG2,ABI1,ABR,ACBD5,ACE,ACER2,ACVR2A,ADAMTS10,ADAMTS9,ADAR,ADARB1,ADCY9,ADGRA2,ADORA3,ADRA1D,ADRA2A,ADSS1,AFAP1L1,AFDN,AFF1,AGTPBP1,AHCTF1,AHCYL2,AHNAK2,AHR,AKAP13,AKAP9,ALDH2,AMIGO3,AMOT,ANKHD1-EIF4EBP3,ANKRD20A4P (includes others),ANKRD23,ANKRD24,ANKRD28,ANKRD33,ANKRD36,ANKRD65,ANKS1A,ANO6,APAF1,APBA1,APCDD1,APOD,APP,AR,ARFGEF1,ARFGEF2,ARFGEF3,ARHGAP27,ARHGAP28,ARHGEF12…	1061
Cancer,Endocrine System Disorders,Organismal Injury and Abnormalities	Endocrine carcinoma	2.15E-121	120.668	1.19444e-119	118.923	0	AASS,ABCA3,ABCA6,ABCB7,ABCC1,ABCG2,ABI1,ABR,ACBD5,ACE,ACER2,ACVR2A,ADAMTS10,ADAMTS9,ADAR,ADARB1,ADCY9,ADGRA2,ADORA3,ADRA1D,ADRA2A,ADSS1,AFAP1L1,AFDN,AFF1,AGTPBP1,AHCTF1,AHCYL2,AHNAK2,AHR,AKAP13,AKAP9,ALDH2,AMIGO3,AMOT,ANKHD1-EIF4EBP3,ANKRD20A4P (includes others),ANKRD23,ANKRD24,ANKRD28,ANKRD33,ANKRD36,ANKRD65,ANKS1A,ANO6,APAF1,APBA1,APCDD1,APOD,AR,ARFGEF1,ARFGEF2,ARFGEF3,ARHGAP27,ARHGAP28,ARHGEF1…	1054
Cancer,Organismal Injury and Abnormalities	Neck neoplasm	5.65E-114	113.248	1.48684e-112	111.828	0	ABCA3,ABCA6,ABCB7,ABCC1,ABCG2,ABI1,ABR,ACBD5,ACE,ACER2,ACVR2A,ADAMTS10,ADAMTS9,ADAR,ADARB1,ADCY9,ADGRA2,ADORA3,ADRA1D,ADRA2A,ADSS1,AFAP1L1,AFDN,AFF1,AGTPBP1,AHCTF1,AHCYL2,AHNAK2,AHR,AKAP13,AKAP9,ALDH2,AMIGO3,AMOT,ANKHD1-EIF4EBP3,ANKRD20A4P (includes others),ANKRD23,ANKRD24,ANKRD28,ANKRD33,ANKRD36,ANKRD65,ANKS1A,ANO6,APAF1,APBA1,APCDD1,APOD,APP,AR,ARFGEF1,ARFGEF2,ARFGEF3,ARHGAP27,ARHGAP28,ARHGEF12…	1022
Cancer,Endocrine System Disorders,Organismal Injury and Abnormalities	Thyroid gland tumor	1.96E-110	109.708	4.66667e-109	108.331	0	ABCA3,ABCA6,ABCB7,ABCC1,ABCG2,ABI1,ABR,ACBD5,ACE,ACER2,ACVR2A,ADAMTS10,ADAMTS9,ADAR,ADARB1,ADCY9,ADGRA2,ADORA3,ADRA1D,ADRA2A,ADSS1,AFAP1L1,AFDN,AFF1,AGTPBP1,AHCTF1,AHCYL2,AHNAK2,AHR,AKAP13,AKAP9,ALDH2,AMIGO3,AMOT,ANKHD1-EIF4EBP3,ANKRD20A4P (includes others),ANKRD23,ANKRD24,ANKRD28,ANKRD33,ANKRD36,ANKRD65,ANKS1A,ANO6,APAF1,APBA1,APCDD1,APOD,AR,ARFGEF1,ARFGEF2,ARFGEF3,ARHGAP27,ARHGAP28,ARHGEF12,ARH…	1011
Cancer,Endocrine System Disorders,Organismal Injury and Abnormalities	Thyroid carcinoma	5.98E-110	109.223	1.35909e-108	107.867	0	ABCA3,ABCA6,ABCB7,ABCC1,ABCG2,ABI1,ABR,ACBD5,ACE,ACER2,ACVR2A,ADAMTS10,ADAMTS9,ADAR,ADARB1,ADCY9,ADGRA2,ADORA3,ADRA1D,ADRA2A,ADSS1,AFAP1L1,AFDN,AFF1,AGTPBP1,AHCTF1,AHCYL2,AHNAK2,AHR,AKAP13,AKAP9,ALDH2,AMIGO3,AMOT,ANKHD1-EIF4EBP3,ANKRD20A4P (includes others),ANKRD23,ANKRD24,ANKRD28,ANKRD33,ANKRD36,ANKRD65,ANKS1A,ANO6,APAF1,APBA1,APCDD1,APOD,AR,ARFGEF1,ARFGEF2,ARFGEF3,ARHGAP27,ARHGAP28,ARHGEF12,ARH…	1005
Cancer,Endocrine System Disorders,Organismal Injury and Abnormalities	Thyroid cancer	7.00E-110	109.155	1.55556e-108	107.808	0	ABCA3,ABCA6,ABCB7,ABCC1,ABCG2,ABI1,ABR,ACBD5,ACE,ACER2,ACVR2A,ADAMTS10,ADAMTS9,ADAR,ADARB1,ADCY9,ADGRA2,ADORA3,ADRA1D,ADRA2A,ADSS1,AFAP1L1,AFDN,AFF1,AGTPBP1,AHCTF1,AHCYL2,AHNAK2,AHR,AKAP13,AKAP9,ALDH2,AMIGO3,AMOT,ANKHD1-EIF4EBP3,ANKRD20A4P (includes others),ANKRD23,ANKRD24,ANKRD28,ANKRD33,ANKRD36,ANKRD65,ANKS1A,ANO6,APAF1,APBA1,APCDD1,APOD,AR,ARFGEF1,ARFGEF2,ARFGEF3,ARHGAP27,ARHGAP28,ARHGEF12,ARH…	1006
Cancer,Neurological Disease,Organismal Injury and Abnormalities	Brain glioma	2.64E-104	103.578	4.4e-103	102.357	0	AASS,ABCA3,ABCA6,ABCB7,ABCC1,ABR,ACBD5,ACE,ACKR3,ACVR2A,ADAMTS10,ADAMTS9,ADAR,ADARB1,ADCK1,ADCY9,ADGRA2,ADGRF5,ADRA1D,ADSS1,AFAP1L1,AFDN,AFF1,AGTPBP1,AHCTF1,AHNAK2,AHR,AKAP13,AKAP9,AKR1E2,ALDH2,AMIGO3,AMOT,ANKHD1-EIF4EBP3,ANKRD20A4P (includes others),ANKRD23,ANKRD24,ANKRD28,ANKRD36,ANKRD65,ANKS1A,ANO6,APAF1,APBA1,APCDD1,APP,ARFGEF1,ARFGEF2,ARFGEF3,ARHGAP28,ARHGEF28,ARHGEF6,ARID2,ARID4A,ARRB1,ARRD…	881
Cancer,Organismal Injury and Abnormalities	Uveal or cutaneous melanoma	2.71E-104	103.567	4.44262e-103	102.352	0	AASS,ABCA3,ABCA6,ABCB7,ABCC1,ABCG2,ABI1,ABR,ACBD4,ACBD5,ACE,ACKR3,ACVR2A,ADAMTS10,ADAMTS9,ADAR,ADARB1,ADCK1,ADCY9,ADGRF5,ADK,ADORA3,ADSS1,AFAP1L1,AFDN,AFF1,AGTPBP1,AHCTF1,AHCYL2,AHNAK2,AHR,AKAP13,AKAP9,AKR1E2,ALDH2,AMIGO3,AMOT,ANKHD1-EIF4EBP3,ANKRD20A4P (includes others),ANKRD23,ANKRD24,ANKRD28,ANKRD33,ANKRD36,ANKS1A,APBA1,APCDD1,APOD,APP,AR,ARFGEF1,ARFGEF2,ARFGEF3,ARHGAP19,ARHGAP27,ARHGAP28,ARHG…	935
Cancer,Dermatological Diseases and Conditions,Organismal Injury and Abnormalities	Cutaneous melanoma	3.59E-104	103.445	5.79032e-103	102.237	0	AASS,ABCA3,ABCA6,ABCB7,ABCC1,ABCG2,ABI1,ABR,ACBD4,ACBD5,ACE,ACKR3,ACVR2A,ADAMTS10,ADAMTS9,ADAR,ADARB1,ADCK1,ADCY9,ADGRF5,ADK,ADORA3,ADSS1,AFAP1L1,AFDN,AFF1,AGTPBP1,AHCTF1,AHCYL2,AHNAK2,AHR,AKAP13,AKAP9,AKR1E2,ALDH2,AMIGO3,AMOT,ANKHD1-EIF4EBP3,ANKRD20A4P (includes others),ANKRD23,ANKRD24,ANKRD28,ANKRD33,ANKRD36,ANKS1A,APBA1,APCDD1,APOD,APP,AR,ARFGEF1,ARFGEF2,ARFGEF3,ARHGAP19,ARHGAP27,ARHGAP28,ARHG…	934
Cancer,Organismal Injury and Abnormalities	Genitourinary adenocarcinoma	6.17E-102	101.21	8.81429e-101	100.055	0	AASS,ABCA3,ABCA6,ABCB7,ABCC1,ABCG2,ABI1,ABR,ACE,ACER2,ACVR2A,ADAMTS10,ADAMTS9,ADAR,ADCK1,ADCY9,ADGRA2,ADGRF5,ADORA3,ADSS1,AFDN,AFF1,AGTPBP1,AHCTF1,AHCYL2,AHNAK2,AHR,AKAP13,AKAP9,ALDH2,AMOT,ANKHD1-EIF4EBP3,ANKRD20A4P (includes others),ANKRD24,ANKRD28,ANKRD36,ANKS1A,ANO6,APAF1,APBA1,APCDD1,APOD,APP,AR,ARFGEF1,ARFGEF2,ARFGEF3,ARHGAP19,ARHGAP27,ARHGAP28,ARHGEF12,ARHGEF28,ARHGEF6,ARID2,ARID4A,ARRB1,AR…	895
Cancer,Organismal Injury and Abnormalities	Pelvic adenocarcinoma	7.58E-101	100.12	9.84416e-100	99.0068	0	AASS,ABCA3,ABCA6,ABCB7,ABCC1,ABCG2,ABI1,ABR,ACBD5,ACE,ACER2,ACVR2A,ADAMTS10,ADAMTS9,ADAR,ADCK1,ADCY9,ADGRA2,ADGRF5,ADORA3,ADSS1,AFF1,AGTPBP1,AHCTF1,AHCYL2,AHNAK2,AHR,AKAP13,AKAP9,ALDH2,AMOT,ANKHD1-EIF4EBP3,ANKRD20A4P (includes others),ANKRD24,ANKRD28,ANKRD36,ANKS1A,ANO6,APAF1,APBA1,APCDD1,APOD,APP,AR,ARFGEF1,ARFGEF2,ARFGEF3,ARHGAP19,ARHGAP27,ARHGAP28,ARHGEF12,ARHGEF28,ARHGEF6,ARID2,ARID4A,ARRB1,A…	843
Cancer,Organismal Injury and Abnormalities	Grade 3-4 tumor	2.11E-88	87.6757	2.54217e-87	86.5948	0	AASS,ABCA3,ABCA6,ABCB7,ABCC1,ABR,ACE,ACKR3,ACVR2A,ADAMTS10,ADAMTS9,ADAR,ADARB1,ADCK1,ADGRA2,ADRA1D,ADSS1,AFAP1L1,AFDN,AFF1,AGTPBP1,AHCTF1,AHNAK2,AHR,AKAP13,AKAP9,ALDH2,AMIGO3,AMOT,ANKHD1-EIF4EBP3,ANKRD20A4P (includes others),ANKRD23,ANKRD24,ANKRD36,ANO6,APAF1,APBA1,APCDD1,APP,AR,ARFGEF1,ARFGEF2,ARFGEF3,ARHGAP28,ARHGEF28,ARHGEF6,ARID2,ARID4A,ARRB1,ARRDC3,ARSG,ARSL,ASAP1,ATAD2B,ATG2A,ATL1,ATOSA,ATP…	794
Cancer,Neurological Disease,Organismal Injury and Abnormalities	Grade 3-4 glioma cancer	2.53E-88	87.5969	3.0119e-87	86.5212	0	AASS,ABCA3,ABCA6,ABCB7,ABCC1,ABR,ACE,ACKR3,ACVR2A,ADAMTS10,ADAMTS9,ADAR,ADARB1,ADCK1,ADGRA2,ADRA1D,ADSS1,AFAP1L1,AFDN,AFF1,AGTPBP1,AHCTF1,AHNAK2,AHR,AKAP13,AKAP9,ALDH2,AMIGO3,AMOT,ANKHD1-EIF4EBP3,ANKRD20A4P (includes others),ANKRD23,ANKRD24,ANKRD36,ANO6,APAF1,APBA1,APCDD1,APP,ARFGEF1,ARFGEF2,ARFGEF3,ARHGAP28,ARHGEF28,ARHGEF6,ARID2,ARID4A,ARRB1,ARRDC3,ARSG,ARSL,ASAP1,ATAD2B,ATG2A,ATL1,ATOSA,ATP10A…	791
Cancer,Organismal Injury and Abnormalities,Reproductive System Disease	Female genital tract cancer	6.37E-86	85.1959	7.1573e-85	84.1453	0	AASS,ABCA3,ABCA6,ABCB7,ABCC1,ABCG2,ABI1,ABR,ACE,ACER2,ACVR2A,ADAMTS10,ADAMTS9,ADCK1,ADCY9,ADGRF5,ADORA3,AFDN,AFF1,AGTPBP1,AHCTF1,AHCYL2,AHNAK2,AHR,AKAP13,AKAP9,ALDH2,AMOT,ANKHD1-EIF4EBP3,ANKRD24,ANKRD28,ANKRD36,ANKS1A,ANO6,APBA1,APCDD1,APOD,APOLD1,APP,AR,ARFGEF1,ARFGEF2,ARFGEF3,ARHGAP19,ARHGAP27,ARHGEF12,ARHGEF28,ARHGEF6,ARID2,ARID4A,ARRB1,ARRDC3,ARSG,ARSL,ASAP1,ATAD2B,ATG2A,ATL1,ATP10A,ATP11A,AT…	763
Cancer,Organismal Injury and Abnormalities,Reproductive System Disease	Female genital tract adenocarcinoma	9.02E-86	85.0448	1.00222e-84	83.999	0	AASS,ABCA3,ABCA6,ABCB7,ABCC1,ABCG2,ABI1,ABR,ACE,ACER2,ACVR2A,ADAMTS10,ADAMTS9,ADCK1,ADCY9,ADGRF5,ADORA3,AFF1,AGTPBP1,AHCTF1,AHCYL2,AHNAK2,AHR,AKAP13,AKAP9,ALDH2,AMOT,ANKHD1-EIF4EBP3,ANKRD24,ANKRD28,ANKRD36,ANKS1A,ANO6,APBA1,APCDD1,APOD,APP,AR,ARFGEF1,ARFGEF2,ARFGEF3,ARHGAP19,ARHGAP27,ARHGEF12,ARHGEF28,ARHGEF6,ARID2,ARID4A,ARRB1,ARRDC3,ARSL,ASAP1,ATAD2B,ATG2A,ATL1,ATP10A,ATP11A,ATP13A3,ATP1A1,ATP7…	694
Organismal Injury and Abnormalities,Reproductive System Disease	Abnormality of endometrium	3.71E-85	84.4306	4.07692e-84	83.3897	0	AASS,ABCA3,ABCA6,ABCB7,ABCC1,ABCG2,ABI1,ABR,ACE,ACER2,ACVR2A,ADAMTS10,ADAMTS9,ADCK1,ADCY9,ADGRF5,ADORA3,AFF1,AGTPBP1,AHCTF1,AHCYL2,AHNAK2,AHR,AKAP13,AKAP9,ALDH2,AMOT,ANKHD1-EIF4EBP3,ANKRD24,ANKRD28,ANKRD36,ANKS1A,ANO6,APBA1,APOD,APOLD1,APP,AR,ARFGEF1,ARFGEF2,ARFGEF3,ARHGAP19,ARHGAP27,ARHGEF12,ARHGEF28,ARHGEF6,ARID2,ARID4A,ARRB1,ARRDC3,ARSL,ATAD2B,ATG2A,ATL1,ATP10A,ATP11A,ATP13A3,ATP7A,ATP7B,ATP9A…	669
Cancer,Organismal Injury and Abnormalities,Reproductive System Disease	Female genital carcinoma	1.81E-84	83.7423	1.94624e-83	82.7108	0	AASS,ABCA3,ABCA6,ABCB7,ABCC1,ABCG2,ABI1,ABR,ACE,ACER2,ACVR2A,ADAMTS10,ADAMTS9,ADCK1,ADCY9,ADGRF5,ADORA3,AFDN,AFF1,AGTPBP1,AHCTF1,AHCYL2,AHNAK2,AHR,AKAP13,AKAP9,ALDH2,AMOT,ANKHD1-EIF4EBP3,ANKRD24,ANKRD28,ANKRD36,ANKS1A,ANO6,APBA1,APCDD1,APOD,APP,AR,ARFGEF1,ARFGEF2,ARFGEF3,ARHGAP19,ARHGAP27,ARHGEF12,ARHGEF28,ARHGEF6,ARID2,ARID4A,ARRB1,ARRDC3,ARSG,ARSL,ASAP1,ATAD2B,ATG2A,ATL1,ATP10A,ATP11A,ATP13A3,A…	723
Cancer,Organismal Injury and Abnormalities	Endometrioid carcinoma	2.87E-83	82.5421	3.05319e-82	81.5152	0	AASS,ABCA3,ABCA6,ABCB7,ABCC1,ABCG2,ABI1,ABR,ACE,ACER2,ACVR2A,ADAMTS10,ADAMTS9,ADCK1,ADCY9,ADGRF5,ADORA3,AFF1,AGTPBP1,AHCTF1,AHCYL2,AHNAK2,AHR,AKAP13,AKAP9,ALDH2,AMOT,ANKHD1-EIF4EBP3,ANKRD24,ANKRD28,ANKRD36,ANKS1A,ANO6,APBA1,APP,AR,ARFGEF1,ARFGEF2,ARFGEF3,ARHGAP19,ARHGAP27,ARHGEF12,ARHGEF28,ARHGEF6,ARID2,ARID4A,ARRB1,ARRDC3,ARSL,ASAP1,ATAD2B,ATG2A,ATL1,ATP10A,ATP11A,ATP13A3,ATP1A1,ATP7A,ATP7B,ATP9…	643
Cancer,Organismal Injury and Abnormalities,Reproductive System Disease	Endometrial cancer	1.15E-82	81.9393	1.18557e-81	80.9261	0	AASS,ABCA3,ABCA6,ABCB7,ABCC1,ABCG2,ABI1,ABR,ACE,ACER2,ACVR2A,ADAMTS9,ADCK1,ADCY9,ADGRF5,ADORA3,AFF1,AGTPBP1,AHCTF1,AHCYL2,AHNAK2,AHR,AKAP13,AKAP9,ALDH2,AMOT,ANKHD1-EIF4EBP3,ANKRD24,ANKRD28,ANKRD36,ANKS1A,ANO6,APBA1,APOD,APOLD1,APP,AR,ARFGEF1,ARFGEF2,ARFGEF3,ARHGAP19,ARHGAP27,ARHGEF12,ARHGEF28,ARHGEF6,ARID2,ARID4A,ARRB1,ARRDC3,ARSL,ATAD2B,ATG2A,ATL1,ATP10A,ATP11A,ATP13A3,ATP7A,ATP7B,ATP9A,ATR,AXIN…	651
Organismal Injury and Abnormalities,Reproductive System Disease	Abnormal growth in endometrium	6.40E-82	81.1938	6.46465e-81	80.1895	0	AASS,ABCA3,ABCA6,ABCB7,ABCC1,ABCG2,ABI1,ABR,ACE,ACER2,ACVR2A,ADAMTS9,ADCK1,ADCY9,ADGRF5,ADORA3,AFF1,AGTPBP1,AHCTF1,AHCYL2,AHNAK2,AHR,AKAP13,AKAP9,ALDH2,AMOT,ANKHD1-EIF4EBP3,ANKRD24,ANKRD28,ANKRD36,ANKS1A,ANO6,APBA1,APOD,APOLD1,APP,AR,ARFGEF1,ARFGEF2,ARFGEF3,ARHGAP19,ARHGAP27,ARHGEF12,ARHGEF28,ARHGEF6,ARID2,ARID4A,ARRB1,ARRDC3,ARSL,ATAD2B,ATG2A,ATL1,ATP10A,ATP11A,ATP13A3,ATP7A,ATP7B,ATP9A,ATR,AXIN…	652
Cancer,Organismal Injury and Abnormalities,Reproductive System Disease	Uterine tumor	2.20E-81	80.6576	2.2e-80	79.6576	0	AASS,ABCA3,ABCA6,ABCB7,ABCC1,ABCG2,ABI1,ABR,ACE,ACER2,ACVR2A,ADAMTS9,ADARB1,ADCK1,ADCY9,ADGRF5,ADORA3,AFDN,AFF1,AGTPBP1,AHCTF1,AHCYL2,AHNAK2,AHR,AKAP13,AKAP9,ALDH2,AMOT,ANKHD1-EIF4EBP3,ANKRD24,ANKRD28,ANKRD36,ANKS1A,ANO6,APBA1,APOD,APOLD1,APP,AR,ARFGEF1,ARFGEF2,ARFGEF3,ARHGAP19,ARHGAP27,ARHGEF12,ARHGEF28,ARHGEF6,ARID2,ARID4A,ARRB1,ARRDC3,ARSL,ATAD2B,ATG2A,ATL1,ATP10A,ATP11A,ATP13A3,ATP6V1A,ATP7A,…	695
Cancer,Neurological Disease,Organismal Injury and Abnormalities	Grade 1-4 astrocytoma	3.19E-81	80.4962	3.09709e-80	79.509	0	AASS,ABCA3,ABCA6,ABCB7,ABCC1,ABR,ACE,ACKR3,ACVR2A,ADAMTS10,ADAMTS9,ADAR,ADARB1,ADCK1,ADCY9,ADGRA2,ADRA1D,ADSS1,AFAP1L1,AFDN,AGTPBP1,AHCTF1,AHNAK2,AHR,AKAP13,AKAP9,ALDH2,AMIGO3,AMOT,ANKHD1-EIF4EBP3,ANKRD20A4P (includes others),ANKRD23,ANKRD24,ANKRD36,ANO6,APAF1,APBA1,APCDD1,APP,ARFGEF1,ARFGEF2,ARFGEF3,ARHGAP28,ARHGEF28,ARHGEF6,ARID2,ARID4A,ARRDC3,ARSG,ARSL,ASAP1,ATAD2B,ATG2A,ATL1,ATOSA,ATP10A,ATP1…	738
Cancer,Neurological Disease,Organismal Injury and Abnormalities	Brain astrocytoma	3.25E-81	80.4881	3.125e-80	79.5051	0	AASS,ABCA3,ABCA6,ABCB7,ABCC1,ABR,ACE,ACKR3,ACVR2A,ADAMTS10,ADAMTS9,ADAR,ADARB1,ADCK1,ADCY9,ADGRA2,ADRA1D,ADSS1,AFAP1L1,AFDN,AGTPBP1,AHCTF1,AHNAK2,AHR,AKAP13,AKAP9,ALDH2,AMIGO3,AMOT,ANKHD1-EIF4EBP3,ANKRD20A4P (includes others),ANKRD23,ANKRD24,ANKRD36,ANO6,APAF1,APBA1,APCDD1,APP,ARFGEF1,ARFGEF2,ARFGEF3,ARHGAP28,ARHGEF28,ARHGEF6,ARID2,ARID4A,ARRDC3,ARSG,ARSL,ASAP1,ATAD2B,ATG2A,ATL1,ATOSA,ATP10A,ATP1…	737
Cancer,Neurological Disease,Organismal Injury and Abnormalities	Grade 4 high grade glioma	3.75E-81	80.426	3.57143e-80	79.4472	0	AASS,ABCA3,ABCA6,ABCB7,ABCC1,ABR,ACE,ACKR3,ACVR2A,ADAMTS10,ADAMTS9,ADAR,ADARB1,ADCK1,ADGRA2,ADRA1D,ADSS1,AFAP1L1,AFDN,AGTPBP1,AHCTF1,AHNAK2,AHR,AKAP13,AKAP9,ALDH2,AMIGO3,AMOT,ANKHD1-EIF4EBP3,ANKRD20A4P (includes others),ANKRD23,ANKRD24,ANKRD36,ANO6,APAF1,APBA1,APCDD1,APP,ARFGEF1,ARFGEF2,ARFGEF3,ARHGAP28,ARHGEF28,ARHGEF6,ARID2,ARID4A,ARRDC3,ARSG,ARSL,ASAP1,ATAD2B,ATG2A,ATL1,ATOSA,ATP10A,ATP11A,ATP…	735
Cancer,Organismal Injury and Abnormalities,Reproductive System Disease	Uterine cancer	5.90E-81	80.2291	5.53271e-80	79.2571	0	AASS,ABCA3,ABCA6,ABCB7,ABCC1,ABCG2,ABI1,ABR,ACE,ACER2,ACVR2A,ADAMTS9,ADCK1,ADCY9,ADGRF5,ADORA3,AFDN,AFF1,AGTPBP1,AHCTF1,AHCYL2,AHNAK2,AHR,AKAP13,AKAP9,ALDH2,AMOT,ANKHD1-EIF4EBP3,ANKRD24,ANKRD28,ANKRD36,ANKS1A,ANO6,APBA1,APOD,APOLD1,APP,AR,ARFGEF1,ARFGEF2,ARFGEF3,ARHGAP19,ARHGAP27,ARHGEF12,ARHGEF28,ARHGEF6,ARID2,ARID4A,ARRB1,ARRDC3,ARSL,ATAD2B,ATG2A,ATL1,ATP10A,ATP11A,ATP13A3,ATP6V1A,ATP7A,ATP7B,A…	679
Cancer,Neurological Disease,Organismal Injury and Abnormalities	Grade 4 astrocytoma	6.90E-81	80.1612	6.38889e-80	79.1946	0	AASS,ABCA3,ABCA6,ABCB7,ABCC1,ABR,ACE,ACKR3,ACVR2A,ADAMTS10,ADAMTS9,ADAR,ADARB1,ADCK1,ADGRA2,ADRA1D,ADSS1,AFAP1L1,AFDN,AGTPBP1,AHCTF1,AHNAK2,AHR,AKAP13,AKAP9,ALDH2,AMIGO3,AMOT,ANKHD1-EIF4EBP3,ANKRD20A4P (includes others),ANKRD23,ANKRD24,ANKRD36,ANO6,APAF1,APBA1,APCDD1,APP,ARFGEF1,ARFGEF2,ARFGEF3,ARHGAP28,ARHGEF28,ARHGEF6,ARID2,ARID4A,ARRDC3,ARSG,ARSL,ASAP1,ATAD2B,ATG2A,ATL1,ATOSA,ATP10A,ATP11A,ATP…	735
Cancer,Gastrointestinal Disease,Organismal Injury and Abnormalities	Colorectal adenocarcinoma	1.31E-78	77.8827	1.15789e-77	76.9363	0	AASS,ABCA3,ABCA6,ABCB7,ABCC1,ACBD5,ACKR3,ACVR2A,ADAMTS9,ADAR,ADARB1,ADCY9,ADGRA2,ADGRF5,ADK,ADSS1,AFAP1L1,AFDN,AFF1,AHCTF1,AHCYL2,AHNAK2,AKAP13,AKAP9,ALDH2,AMIGO3,AMOT,ANKHD1-EIF4EBP3,ANKRD20A4P (includes others),ANKRD23,ANKRD24,ANKRD28,ANKRD36,ANKS1A,APAF1,APBA1,APOD,AR,ARFGEF1,ARFGEF3,ARHGAP27,ARHGEF28,ARHGEF6,ARID2,ARID4A,ARL10,ARSL,ASAP2,ATAD2B,ATAT1,ATE1,ATG2A,ATOSA,ATP10A,ATP11A,ATP13A3,ATP…	685
Cancer,Organismal Injury and Abnormalities,Reproductive System Disease	Uterine carcinoma	1.24E-76	75.9066	1.04202e-75	74.9821	0	AASS,ABCA6,ABCB7,ABCC1,ABCG2,ABI1,ABR,ACE,ACER2,ACVR2A,ADAMTS9,ADCK1,ADCY9,ADGRF5,ADORA3,AFDN,AFF1,AGTPBP1,AHCTF1,AHCYL2,AHNAK2,AHR,AKAP13,AKAP9,ALDH2,AMOT,ANKHD1-EIF4EBP3,ANKRD24,ANKRD28,ANKRD36,ANKS1A,ANO6,APBA1,APOD,APP,AR,ARFGEF1,ARFGEF2,ARFGEF3,ARHGAP19,ARHGAP27,ARHGEF12,ARHGEF28,ARHGEF6,ARID2,ARID4A,ARRB1,ARRDC3,ARSL,ATAD2B,ATG2A,ATL1,ATP10A,ATP11A,ATP13A3,ATP6V1A,ATP7A,ATP7B,ATP9A,ATR,AXIN…	640
Cancer,Gastrointestinal Disease,Organismal Injury and Abnormalities	Colon adenocarcinoma	1.42E-76	75.8477	1.18333e-75	74.9269	0	ABCA3,ABCA6,ABCB7,ABCC1,ACKR3,ACVR2A,ADAMTS9,ADAR,ADARB1,ADCY9,ADGRA2,ADGRF5,ADK,ADSS1,AFAP1L1,AFDN,AFF1,AHCTF1,AHCYL2,AHNAK2,AKAP13,AKAP9,ALDH2,AMIGO3,AMOT,ANKHD1-EIF4EBP3,ANKRD20A4P (includes others),ANKRD23,ANKRD24,ANKRD28,ANKRD36,ANKS1A,APAF1,APBA1,APOD,AR,ARFGEF1,ARFGEF3,ARHGAP27,ARHGEF28,ARHGEF6,ARID2,ARID4A,ARL10,ASAP2,ATAD2B,ATE1,ATG2A,ATOSA,ATP10A,ATP11A,ATP13A3,ATP7A,ATP7B,ATR,AXIN2,BAC…	656
Cancer,Organismal Injury and Abnormalities,Reproductive System Disease	Endometrial carcinoma	2.80E-76	75.5528	2.31405e-75	74.6356	0	AASS,ABCA6,ABCB7,ABCC1,ABCG2,ABI1,ABR,ACE,ACER2,ACVR2A,ADAMTS9,ADCK1,ADCY9,ADGRF5,ADORA3,AFF1,AGTPBP1,AHCTF1,AHCYL2,AHNAK2,AHR,AKAP13,AKAP9,ALDH2,AMOT,ANKHD1-EIF4EBP3,ANKRD24,ANKRD28,ANKRD36,ANKS1A,ANO6,APBA1,APOD,APP,AR,ARFGEF1,ARFGEF2,ARFGEF3,ARHGAP19,ARHGAP27,ARHGEF12,ARHGEF28,ARHGEF6,ARID2,ARID4A,ARRB1,ARRDC3,ARSL,ATAD2B,ATG2A,ATL1,ATP10A,ATP11A,ATP13A3,ATP7A,ATP7B,ATP9A,ATR,AXIN2,BAZ2B,BCL9,…	606
Cancer,Organismal Injury and Abnormalities,Reproductive System Disease	Endometrioid endometrial adenocarcinoma	5.13E-76	75.2899	4.20492e-75	74.3762	0	AASS,ABCA6,ABCB7,ABCC1,ABCG2,ABI1,ABR,ACE,ACER2,ACVR2A,ADAMTS9,ADCK1,ADCY9,ADGRF5,ADORA3,AFF1,AGTPBP1,AHCTF1,AHCYL2,AHNAK2,AHR,AKAP13,AKAP9,ALDH2,AMOT,ANKHD1-EIF4EBP3,ANKRD24,ANKRD28,ANKRD36,ANKS1A,ANO6,APBA1,APP,AR,ARFGEF1,ARFGEF2,ARFGEF3,ARHGAP19,ARHGAP27,ARHGEF12,ARHGEF28,ARHGEF6,ARID2,ARID4A,ARRB1,ARRDC3,ARSL,ATAD2B,ATG2A,ATL1,ATP10A,ATP11A,ATP13A3,ATP7A,ATP7B,ATP9A,ATR,AXIN2,BAZ2B,BCL9,BCOR,…	591
Cancer,Organismal Injury and Abnormalities,Reproductive System Disease	Endometrial adenocarcinoma	1.03E-75	74.9872	8.37398e-75	74.0771	0	AASS,ABCA6,ABCB7,ABCC1,ABCG2,ABI1,ABR,ACE,ACER2,ACVR2A,ADAMTS9,ADCK1,ADCY9,ADGRF5,ADORA3,AFF1,AGTPBP1,AHCTF1,AHCYL2,AHNAK2,AHR,AKAP13,AKAP9,ALDH2,AMOT,ANKHD1-EIF4EBP3,ANKRD24,ANKRD28,ANKRD36,ANKS1A,ANO6,APBA1,APOD,APP,AR,ARFGEF1,ARFGEF2,ARFGEF3,ARHGAP19,ARHGAP27,ARHGEF12,ARHGEF28,ARHGEF6,ARID2,ARID4A,ARRB1,ARRDC3,ARSL,ATAD2B,ATG2A,ATL1,ATP10A,ATP11A,ATP13A3,ATP7A,ATP7B,ATP9A,ATR,AXIN2,BAZ2B,BCL9,…	601
Cancer,Gastrointestinal Disease,Organismal Injury and Abnormalities	Upper gastrointestinal carcinoma	7.54E-72	71.1226	6.08065e-71	70.2161	0	AASS,ABCA6,ABCB7,ABCC1,ABR,ACBD4,ACBD5,ACVR2A,ADAMTS10,ADAMTS9,ADAR,ADARB1,ADCK1,ADCY9,ADGRA2,ADK,ADSS1,AFAP1L1,AFDN,AFF1,AGTPBP1,AHCTF1,AHCYL2,AHNAK2,AKAP13,AKAP9,ALDH2,ANKRD20A4P (includes others),ANKRD23,ANKRD24,ANKRD28,ANKRD36,ANKRD65,ANKS1A,APAF1,APBA1,APP,AR,ARFGEF1,ARFGEF2,ARFGEF3,ARHGAP19,ARHGAP28,ARHGEF6,ARID2,ARID4A,ARSG,ASAP1,ASAP2,ASL,ATAD2B,ATG2A,ATP10A,ATP11A,ATP13A3,ATP2B4,ATP6V1A,…	677
Cancer,Gastrointestinal Disease,Organismal Injury and Abnormalities	Non-colon gastrointestinal cancer	1.64E-70	69.7852	1.27132e-69	68.8957	0	AASS,ABCA6,ABCB7,ABCC1,ABR,ACBD4,ACBD5,ACVR2A,ADAMTS10,ADAMTS9,ADAR,ADARB1,ADCK1,ADCY9,ADGRA2,ADK,ADRA1D,ADRA2A,ADSS1,AFAP1L1,AFDN,AFF1,AGTPBP1,AHCTF1,AHCYL2,AHNAK2,AKAP13,AKAP9,ALDH2,ANKRD20A4P (includes others),ANKRD23,ANKRD24,ANKRD28,ANKRD36,ANKRD65,ANKS1A,APAF1,APBA1,APOD,APP,AR,ARFGEF1,ARFGEF2,ARFGEF3,ARHGAP19,ARHGAP28,ARHGEF6,ARID2,ARID4A,ARSG,ARSL,ASAP1,ASAP2,ASL,ATAD2B,ATAT1,ATG2A,ATP10A,…	716
Cancer,Gastrointestinal Disease,Organismal Injury and Abnormalities	Upper gastrointestinal tract cancer	7.24E-68	67.1403	5.36296e-67	66.2706	0	AASS,ABCA6,ABCB7,ABCC1,ABR,ACBD4,ACBD5,ACVR2A,ADAMTS10,ADAMTS9,ADAR,ADARB1,ADCK1,ADCY9,ADGRA2,ADK,ADRA1D,ADRA2A,ADSS1,AFAP1L1,AFDN,AFF1,AGTPBP1,AHCTF1,AHCYL2,AHNAK2,AKAP13,AKAP9,ALDH2,ANKRD20A4P (includes others),ANKRD23,ANKRD24,ANKRD28,ANKRD36,ANKRD65,ANKS1A,APAF1,APBA1,APP,AR,ARFGEF1,ARFGEF2,ARFGEF3,ARHGAP19,ARHGAP28,ARHGEF6,ARID2,ARID4A,ARSG,ASAP1,ASAP2,ASL,ATAD2B,ATG2A,ATP10A,ATP11A,ATP13A3,A…	687
Cancer,Gastrointestinal Disease,Organismal Injury and Abnormalities	Non-colorectal gastrointestinal cancer	4.59E-67	66.3382	3.27857e-66	65.4843	0	AASS,ABCA6,ABCB7,ABCC1,ABR,ACBD4,ACBD5,ACVR2A,ADAMTS10,ADAMTS9,ADAR,ADARB1,ADCK1,ADCY9,ADGRA2,ADK,ADRA1D,ADRA2A,ADSS1,AFAP1L1,AFDN,AFF1,AGTPBP1,AHCTF1,AHCYL2,AHNAK2,AKAP13,AKAP9,ALDH2,ANKRD20A4P (includes others),ANKRD23,ANKRD24,ANKRD28,ANKRD36,ANKRD65,ANKS1A,APAF1,APBA1,APP,AR,ARFGEF1,ARFGEF2,ARFGEF3,ARHGAP19,ARHGAP28,ARHGEF6,ARID2,ARID4A,ARSG,ASAP1,ASAP2,ASL,ATAD2B,ATG2A,ATP10A,ATP11A,ATP13A3,A…	688
Cancer,Organismal Injury and Abnormalities	Cancer of head	5.46E-65	64.2628	3.66443e-64	63.436	0	ABCA6,ABCC1,ABCG2,ACBD5,ACE,ACVR2A,ADAMTS9,ADCK1,ADCY9,ADGRA2,ADGRF5,ADRA1D,AFDN,AGTPBP1,AHNAK2,AHR,AKAP13,AKAP9,AKR1E2,ANKHD1-EIF4EBP3,ANKRD24,ANKRD28,ANKRD36,ANKRD65,ANKS1A,APAF1,APP,AR,ARFGEF3,ARHGEF28,ARID2,ASAP1,ATAD2B,ATF7,ATP10A,ATP11A,ATP13A3,ATP6V1A,ATP7A,ATR,BAZ2B,BCL9,BCOR,BFAR,BIRC6,BMAL2,BMX,BOC,BRCA2,BTBD3,BTBD8,C1QL3,C2CD2,C2orf81,C8orf82,CAMKK2,CAST,CAVIN2,CBL,CC2D2A,CC2D2B,CCDC15…	527
Cancer,Organismal Injury and Abnormalities,Reproductive System Disease	Prostatic carcinoma	8.26E-64	63.083	5.29487e-63	62.2761	0	ABCC1,ABCG2,ABR,ACVR2A,ADAR,ADCY9,ADGRA2,ADSS1,AFF1,AHCTF1,AHNAK2,AKAP13,AKAP9,ALDH2,ANKHD1-EIF4EBP3,ANKRD20A4P (includes others),ANKRD23,ANKRD36,APBA1,APOLD1,AR,ARFGEF2,ARFGEF3,ARHGAP28,ARHGEF12,ARID2,ARRDC3,ASAP2,ATAT1,ATG2A,ATOSA,ATP11A,ATP1A1,ATP2B4,ATP6V1A,ATR,AXIN2,BAZ2A,BAZ2B,BCAS3,BCL2L11,BCL9,BDH1,BIRC6,BMPR2,BRCA2,BRME1,C8orf82,CALCRL,CARF,CASK,CAVIN2,CBL,CCDC180,CCDC80,CCDC88C,CCSER2,C…	514
Cancer,Gastrointestinal Disease,Organismal Injury and Abnormalities	Formation of stomach tumor	1.96E-63	62.7077	1.24051e-62	61.9064	0	AASS,ABCA6,ABCC1,ABR,ACBD4,ACBD5,ACVR2A,ADAMTS10,ADAMTS9,ADAR,ADARB1,ADCK1,ADCY9,ADGRA2,ADK,ADSS1,AFAP1L1,AFDN,AFF1,AGTPBP1,AHCTF1,AHCYL2,AHNAK2,AKAP13,AKAP9,ALDH2,ANKRD20A4P (includes others),ANKRD23,ANKRD24,ANKRD28,ANKRD36,ANKRD65,ANKS1A,APAF1,APBA1,APP,AR,ARFGEF1,ARHGAP19,ARHGAP28,ARHGEF6,ARID2,ARID4A,ASAP1,ASAP2,ATAD2B,ATG2A,ATP10A,ATP11A,ATP13A3,ATP2B4,ATP9A,ATR,AXIN2,B3GNT5,BACE2,BAZ2B,BCL9…	538
Cancer,Gastrointestinal Disease,Organismal Injury and Abnormalities	Gastric carcinoma	8.97E-62	61.0472	5.53704e-61	60.2567	0	AASS,ABCA6,ABCC1,ABR,ACBD4,ACBD5,ACVR2A,ADAMTS10,ADAMTS9,ADAR,ADARB1,ADCK1,ADCY9,ADGRA2,ADK,ADSS1,AFAP1L1,AFDN,AFF1,AGTPBP1,AHCTF1,AHCYL2,AHNAK2,AKAP13,AKAP9,ALDH2,ANKRD20A4P (includes others),ANKRD23,ANKRD24,ANKRD28,ANKRD36,ANKRD65,ANKS1A,APAF1,APBA1,APP,AR,ARFGEF1,ARHGAP19,ARHGAP28,ARHGEF6,ARID2,ARID4A,ASAP1,ASAP2,ATAD2B,ATG2A,ATP10A,ATP11A,ATP13A3,ATP2B4,ATP9A,ATR,AXIN2,B3GNT5,BACE2,BAZ2B,BCL9…	533
Cancer,Gastrointestinal Disease,Organismal Injury and Abnormalities	Gastroesophageal carcinoma	1.33E-61	60.8761	8.15951e-61	60.0883	0	AASS,ABCA6,ABCC1,ABR,ACBD4,ACBD5,ACVR2A,ADAMTS10,ADAMTS9,ADAR,ADARB1,ADCK1,ADCY9,ADGRA2,ADK,ADSS1,AFAP1L1,AFDN,AFF1,AGTPBP1,AHCTF1,AHCYL2,AHNAK2,AKAP13,AKAP9,ALDH2,ANKRD20A4P (includes others),ANKRD23,ANKRD24,ANKRD28,ANKRD36,ANKRD65,ANKS1A,APAF1,APBA1,APP,AR,ARFGEF1,ARFGEF2,ARHGAP19,ARHGAP28,ARHGEF6,ARID2,ARID4A,ARSG,ASAP1,ASAP2,ASL,ATAD2B,ATG2A,ATP10A,ATP11A,ATP13A3,ATP2B4,ATP7B,ATP9A,ATR,AXIN2,…	580
Cancer,Organismal Injury and Abnormalities,Renal and Urological Disease	Bladder carcinoma	2.09E-58	57.6799	1.25904e-57	56.9	0	ABCA6,ABCC1,ABCG2,ABR,ACBD5,ACE,ACVR2A,ADAMTS9,ADAR,ADARB1,ADCK1,ADGRA2,ADGRF5,ADORA3,ADSS1,AGTPBP1,AHNAK2,AHR,AKAP13,AKAP9,AKR1E2,AMOT,ANKRD24,ANKRD33,ANKRD36,ANKS1A,ANO6,APAF1,APOD,AR,ARHGAP19,ARHGAP27,ARHGEF28,ARID2,ARID4A,ARSL,ATE1,ATG2A,ATL1,ATP10A,ATP11A,ATP13A3,ATP1A1,ATP2B4,ATP7A,ATP9A,ATR,AXIN2,BCAS3,BCL2L11,BCL9,BCOR,BICRAL,BIRC6,BMAL1,BOC,BRCA2,BRME1,BTBD8,CAMKK2,CAND2,CARF,CASK,CAST,C…	558
Cancer,Organismal Injury and Abnormalities,Renal and Urological Disease	Bladder cancer	1.33E-57	56.8761	7.86982e-57	56.104	0	ABCA6,ABCC1,ABCG2,ABR,ACBD5,ACE,ACVR2A,ADAMTS9,ADAR,ADARB1,ADCK1,ADGRA2,ADGRF5,ADORA3,ADSS1,AGTPBP1,AHNAK2,AHR,AKAP13,AKAP9,AKR1E2,AMOT,ANKRD24,ANKRD33,ANKRD36,ANKS1A,ANO6,APAF1,APBA1,APOD,AR,ARHGAP19,ARHGAP27,ARHGEF28,ARID2,ARID4A,ARSL,ATE1,ATG2A,ATL1,ATP10A,ATP11A,ATP13A3,ATP1A1,ATP2B4,ATP7A,ATP9A,ATR,AXIN2,BCAS3,BCL2L11,BCL9,BCOR,BICRAL,BIRC6,BMAL1,BOC,BRCA2,BRME1,BTBD8,CAMKK2,CAND2,CARF,CASK,…	567
Cancer,Organismal Injury and Abnormalities,Renal and Urological Disease	Bladder tumor	5.21E-57	56.2832	3.01156e-56	55.5212	0	ABCA6,ABCC1,ABCG2,ABR,ACBD5,ACE,ACVR2A,ADAMTS9,ADAR,ADARB1,ADCK1,ADGRA2,ADGRF5,ADORA3,ADSS1,AGTPBP1,AHNAK2,AHR,AKAP13,AKAP9,AKR1E2,AMOT,ANKRD24,ANKRD33,ANKRD36,ANKS1A,ANO6,APAF1,APBA1,APOD,AR,ARHGAP19,ARHGAP27,ARHGEF28,ARID2,ARID4A,ARSL,ATE1,ATG2A,ATL1,ATP10A,ATP11A,ATP13A3,ATP1A1,ATP2B4,ATP7A,ATP9A,ATR,AXIN2,BCAS3,BCL2L11,BCL9,BCOR,BICRAL,BIRC6,BMAL1,BOC,BRCA2,BRME1,BTBD8,CAMKK2,CAND2,CARF,CASK,…	568
Cancer,Gastrointestinal Disease,Organismal Injury and Abnormalities	Gastroesophageal cancer	7.68E-56	55.1146	4.26667e-55	54.3699	0	AASS,ABCA6,ABCC1,ABR,ACBD4,ACBD5,ACVR2A,ADAMTS10,ADAMTS9,ADAR,ADARB1,ADCK1,ADCY9,ADGRA2,ADK,ADRA1D,ADRA2A,ADSS1,AFAP1L1,AFDN,AFF1,AGTPBP1,AHCTF1,AHCYL2,AHNAK2,AKAP13,AKAP9,ALDH2,ANKRD20A4P (includes others),ANKRD23,ANKRD24,ANKRD28,ANKRD36,ANKRD65,ANKS1A,APAF1,APBA1,APP,AR,ARFGEF1,ARFGEF2,ARHGAP19,ARHGAP28,ARHGEF6,ARID2,ARID4A,ARSG,ASAP1,ASAP2,ASL,ATAD2B,ATG2A,ATP10A,ATP11A,ATP13A3,ATP2B4,ATP7B,AT…	587
Cancer,Organismal Injury and Abnormalities,Reproductive System Disease	Prostatic adenocarcinoma	1.21E-54	53.9172	6.47059e-54	53.1891	0	ABCC1,ABCG2,ABR,ACVR2A,ADAR,ADCY9,ADGRA2,ADSS1,AFF1,AHCTF1,AHNAK2,AKAP13,ALDH2,ANKHD1-EIF4EBP3,ANKRD20A4P (includes others),APBA1,AR,ARFGEF2,ARFGEF3,ARHGAP28,ARHGEF12,ARID2,ARRDC3,ASAP2,ATG2A,ATOSA,ATP11A,ATP1A1,ATP2B4,ATR,AXIN2,BAZ2A,BAZ2B,BCAS3,BCL2L11,BCL9,BDH1,BIRC6,BMPR2,BRCA2,BRME1,C8orf82,CALCRL,CARF,CASK,CAVIN2,CBL,CCDC180,CCDC80,CCDC88C,CCSER2,CD34,CDK6,CDK7,CDON,CELF2,CEP120,CEP170,CEP1…	460
Cancer,Gastrointestinal Disease,Organismal Injury and Abnormalities	Gastric cancer	1.74E-54	53.7595	9.20635e-54	53.0359	0	AASS,ABCA6,ABCC1,ABR,ACBD4,ACBD5,ACVR2A,ADAMTS10,ADAMTS9,ADAR,ADARB1,ADCK1,ADCY9,ADGRA2,ADK,ADRA1D,ADRA2A,ADSS1,AFAP1L1,AFDN,AFF1,AGTPBP1,AHCTF1,AHCYL2,AHNAK2,AKAP13,AKAP9,ALDH2,ANKRD20A4P (includes others),ANKRD23,ANKRD24,ANKRD28,ANKRD36,ANKRD65,ANKS1A,APAF1,APBA1,APP,AR,ARFGEF1,ARHGAP19,ARHGAP28,ARHGEF6,ARID2,ARID4A,ASAP1,ASAP2,ATAD2B,ATG2A,ATP10A,ATP11A,ATP13A3,ATP2B4,ATP9A,ATR,AXIN2,B3GNT5,BA…	539
Cancer,Organismal Injury and Abnormalities	Head and neck squamous cell carcinoma	2.21E-53	52.6556	1.15707e-52	51.9366	0	ABCA6,ABCC1,ACE,ACVR2A,ADARB1,ADCY9,AFDN,AFF1,AHNAK2,AKAP13,AKAP9,ALDH2,ANKHD1-EIF4EBP3,ANKRD20A4P (includes others),ANKRD36,ANKRD65,APCDD1,APOD,APP,AR,ARFGEF3,ARHGAP28,ARID2,ARID4A,ASAP1,ASAP2,ASL,ATAD2B,ATAT1,ATG2A,ATP10A,ATP13A3,ATP6V1A,ATP7A,ATR,AXIN2,BAZ2B,BCL9,BCOR,BIRC6,BOC,BRCA2,BTBD3,BTBD8,C2CD2,C2orf81,CAMKK2,CCDC144A,CCDC150,CCDC180,CCNB1IP1,CCSER2,CD34,CD74,CDC42BPA,CDK5RAP2,CDK6,CDON…	454
Cancer,Neurological Disease,Organismal Injury and Abnormalities	Malignant brain glioma	9.48E-49	48.0232	4.71642e-48	47.3264	0	ACBD5,ACE,ACVR2A,ADAMTS9,ADCK1,ADGRF5,ADRA1D,AFDN,AGTPBP1,AHNAK2,AHR,AKAP13,AKAP9,AKR1E2,ANKHD1-EIF4EBP3,ANKRD24,ANKRD28,ANKRD65,ANKS1A,APAF1,APP,ARFGEF3,ARHGEF28,ATF7,ATP10A,ATP11A,ATP6V1A,ATR,BAZ2B,BFAR,BIRC6,BMAL2,BMX,BRCA2,BTBD8,C1QL3,C2orf81,C8orf82,CAMKK2,CAST,CAVIN2,CBL,CC2D2A,CC2D2B,CCDC180,CCDC88C,CDC14A,CDC42BPA,CDK5RAP2,CDKL5,CELF2,CEP192,CHD4,CHD6,CHM,CLOCK,CNOT6L,CNTNAP1,COL7A1,CPEB3…	371
Cancer,Neurological Disease,Organismal Injury and Abnormalities	Brain cancer	1.95E-48	47.71	9.55882e-48	47.0196	0	ABCG2,ACBD5,ACE,ACVR2A,ADAMTS9,ADCK1,ADGRA2,ADGRF5,ADRA1D,AFDN,AGTPBP1,AHNAK2,AHR,AKAP13,AKAP9,AKR1E2,ANKHD1-EIF4EBP3,ANKRD24,ANKRD28,ANKRD65,ANKS1A,APAF1,APP,ARFGEF3,ARHGEF28,ARID2,ATF7,ATP10A,ATP11A,ATP6V1A,ATR,BAZ2B,BCOR,BFAR,BIRC6,BMAL2,BMX,BRCA2,BTBD8,C1QL3,C2orf81,C8orf82,CAMKK2,CAST,CAVIN2,CBL,CC2D2A,CC2D2B,CCDC180,CCDC88C,CDC14A,CDC42BPA,CDK5RAP2,CDK6,CDKL5,CELF2,CEP192,CHD4,CHD6,CHD7,CHM…	389
Cancer,Neurological Disease,Organismal Injury and Abnormalities	Gliomatosis cerebri	3.62E-48	47.4413	1.74038e-47	46.7594	0	ACBD5,ACE,ACVR2A,ADAMTS9,ADCK1,ADGRF5,ADRA1D,AFDN,AGTPBP1,AHNAK2,AHR,AKAP13,AKAP9,AKR1E2,ANKHD1-EIF4EBP3,ANKRD24,ANKRD28,ANKRD65,ANKS1A,APAF1,APP,ARFGEF3,ARHGEF28,ATF7,ATP10A,ATP11A,ATP6V1A,ATR,BAZ2B,BFAR,BIRC6,BMAL2,BMX,BRCA2,BTBD8,C1QL3,C2orf81,C8orf82,CAMKK2,CAST,CAVIN2,CC2D2A,CC2D2B,CCDC180,CCDC88C,CDC14A,CDC42BPA,CDK5RAP2,CDKL5,CELF2,CEP192,CHD4,CHD6,CHM,CLOCK,CNOT6L,CNTNAP1,COL7A1,CPEB3,CRA…	369
Cancer,Organismal Injury and Abnormalities	Extrapulmonary squamous cell carcinoma	1.52E-47	46.8182	7.1028e-47	46.1486	0	ABCA6,ABCC1,ACE,ACVR2A,ADAMTS10,ADARB1,ADCY9,AFDN,AFF1,AHNAK2,AHR,AKAP13,AKAP9,ALDH2,ANKHD1-EIF4EBP3,ANKRD20A4P (includes others),ANKRD36,ANKRD65,APBA1,APCDD1,APOD,APP,AR,ARFGEF3,ARHGAP28,ARHGEF12,ARID2,ARID4A,ARSG,ASAP1,ASAP2,ASL,ATAD2B,ATAT1,ATG2A,ATP10A,ATP13A3,ATP6V1A,ATP7A,ATP7B,ATR,AXIN2,BAZ2A,BAZ2B,BCL9,BCOR,BIRC6,BOC,BRCA2,BTBD3,BTBD8,C2CD2,C2orf81,CAMKK2,CAST,CBL,CCDC144A,CCDC150,CCDC180…	530
Cancer,Organismal Injury and Abnormalities	Malignant neoplasm of aerodigestive tract	5.85E-45	44.2328	2.67123e-44	43.5733	0	ABCA6,ABCB7,ABCC1,ACVR2A,ADARB1,ADCY9,ADRA1D,AFDN,AHNAK2,AKAP13,AKAP9,ALDH2,ANKRD36,APBA1,AR,ARFGEF2,ARFGEF3,ARHGAP28,ARID2,ARSG,ASAP1,ASAP2,ASL,ATAD2B,ATG2A,ATP10A,ATP13A3,ATP6V1A,ATP7A,ATP7B,ATR,BAZ2B,BCAS3,BCL9,BCOR,BIRC6,BOC,BRCA2,BTBD3,C2CD2,C2orf81,CCDC150,CCNB1IP1,CCR7,CDC42BPA,CDK5RAP2,CDK6,CECR2,CELF2,CEP162,CEP290,CEP295,CGNL1,CHD4,CHD6,CHD7,CHN1,CHRNA7,CIT,CLCN3,CLEC16A,CLIC2,CLU,COL7A…	418
Cancer,Gastrointestinal Disease,Organismal Injury and Abnormalities	Gastroesophageal adenocarcinoma	1.72E-44	43.7645	7.81818e-44	43.1069	0	AASS,ABCA6,ABCC1,ACBD4,ACVR2A,ADAMTS10,ADAR,ADARB1,ADCK1,ADCY9,ADGRA2,ADSS1,AFAP1L1,AFF1,AGTPBP1,AHCTF1,AHNAK2,AKAP13,AKAP9,ALDH2,ANKRD20A4P (includes others),ANKRD28,ANKRD36,ANKS1A,APBA1,APP,AR,ARFGEF2,ARHGAP28,ARID2,ARID4A,ASAP1,ASAP2,ASL,ATAD2B,ATG2A,ATP10A,ATP2B4,ATP9A,ATR,AXIN2,B3GNT5,BACE2,BCL9,BCOR,BMAL1,BMPR2,BOC,BRCA2,C2CD2,CAPS2,CAST,CAVIN2,CBL,CCDC180,CCDC80,CD109,CD34,CDK5RAP2,CDK6,CD…	388
Cancer,Organismal Injury and Abnormalities	Upper aerodigestive tract carcinoma	3.11E-44	43.5072	1.4009e-43	42.8536	0	ABCA6,ABCB7,ABCC1,ACVR2A,ADARB1,ADCY9,AFDN,AHNAK2,AKAP13,AKAP9,ALDH2,ANKRD36,APBA1,AR,ARFGEF2,ARFGEF3,ARHGAP28,ARID2,ARSG,ASAP1,ASAP2,ASL,ATAD2B,ATG2A,ATP10A,ATP13A3,ATP6V1A,ATP7A,ATP7B,ATR,BAZ2B,BCAS3,BCL9,BCOR,BIRC6,BOC,BRCA2,BTBD3,C2CD2,C2orf81,CCDC150,CCNB1IP1,CCR7,CDC42BPA,CDK5RAP2,CDK6,CECR2,CELF2,CEP162,CEP290,CEP295,CGNL1,CHD4,CHD6,CHD7,CHN1,CHRNA7,CIT,CLCN3,CLEC16A,CLIC2,CLU,COL7A1,CPEB3…	407
Cancer,Hematological Disease,Organismal Injury and Abnormalities	Mature lymphocytic neoplasm	1.30E-43	42.8861	5.75221e-43	42.2402	0	AASS,ABCC1,ABCG2,ACE,ADAMTS9,ADAR,ADGRF5,ADRA1D,AGTPBP1,AHCTF1,AHCYL2,AHNAK2,AHR,ALDH2,AMIGO3,AMOT,ANKRD20A4P (includes others),ANKRD24,ANKRD36,ANKS1A,APBA1,APCDD1,APP,ARFGEF3,ARHGEF28,ARHGEF6,ARID2,ARID4A,ASAP2,ATP10A,ATP13A3,ATP7A,ATR,AXIN2,BAZ2A,BAZ2B,BCL2L11,BCL9,BCOR,BIRC6,BRCA2,BRME1,CALCRL,CAMKK2,CAVIN2,CC2D2A,CCDC144A,CCL5,CCR7,CCSER2,CD34,CD74,CDC14A,CDK6,CDON,CELF2,CEP120,CEP162,CEP170,…	410
Cancer,Organismal Injury and Abnormalities	Transitional-cell carcinoma	4.41E-43	42.3556	1.93421e-42	41.7135	0	ABCA6,ABCC1,ABCG2,ABR,ACBD5,ACE,ACVR2A,ADAR,ADARB1,ADCK1,ADGRA2,ADGRF5,ADORA3,ADSS1,AGTPBP1,AHNAK2,AKAP13,AKAP9,ANKRD24,ANKRD33,ANKRD36,ANKS1A,APAF1,APOD,AR,ARHGAP19,ARHGEF28,ARID2,ARID4A,ARSL,ATE1,ATL1,ATP10A,ATP11A,ATP1A1,ATP2B4,ATP7A,ATP9A,ATR,AXIN2,BCAS3,BCL2L11,BCOR,BICRAL,BIRC6,BOC,BRCA2,BRME1,BTBD8,CAMKK2,CAND2,CARF,CASK,CAST,CC2D2A,CCDC150,CCDC180,CCDC80,CCDC88C,CCSER2,CD177,CDC42BPA,CDON…	438
Cancer,Organismal Injury and Abnormalities,Renal and Urological Disease	Urothelial transitional cell carcinoma	7.18E-43	42.1439	3.13537e-42	41.5037	0	ABCA6,ABCC1,ABCG2,ABR,ACBD5,ACE,ACVR2A,ADAR,ADARB1,ADCK1,ADGRA2,ADGRF5,ADORA3,ADSS1,AGTPBP1,AHNAK2,AKAP13,AKAP9,ANKRD24,ANKRD33,ANKRD36,ANKS1A,APAF1,APOD,AR,ARHGAP19,ARHGEF28,ARID2,ARID4A,ARSL,ATE1,ATL1,ATP10A,ATP11A,ATP1A1,ATP2B4,ATP7A,ATP9A,ATR,AXIN2,BCAS3,BCL2L11,BCOR,BICRAL,BIRC6,BOC,BRCA2,BRME1,BTBD8,CAMKK2,CAND2,CARF,CASK,CAST,CC2D2A,CCDC150,CCDC180,CCDC80,CCDC88C,CCSER2,CD177,CDC42BPA,CDON…	437
Cancer,Organismal Injury and Abnormalities,Renal and Urological Disease	Urothelial cancer	1.98E-42	41.7033	8.53448e-42	41.0688	0	ABCA6,ABCC1,ABCG2,ABR,ACBD5,ACE,ACVR2A,ADAR,ADARB1,ADCK1,ADGRA2,ADGRF5,ADORA3,ADSS1,AGTPBP1,AHNAK2,AKAP13,AKAP9,ANKRD24,ANKRD33,ANKRD36,ANKS1A,APAF1,APOD,AR,ARHGAP19,ARHGEF28,ARID2,ARID4A,ARSL,ATE1,ATL1,ATP10A,ATP11A,ATP1A1,ATP2B4,ATP7A,ATP9A,ATR,AXIN2,BCAS3,BCL2L11,BCOR,BICRAL,BIRC6,BOC,BRCA2,BRME1,BTBD8,CAMKK2,CAND2,CARF,CASK,CAST,CC2D2A,CCDC150,CCDC180,CCDC80,CCDC88C,CCSER2,CD177,CDC42BPA,CDON…	438
Cancer,Organismal Injury and Abnormalities,Renal and Urological Disease	Urothelial bladder carcinoma	2.97E-42	41.5272	1.27468e-41	40.8946	0	ABCA6,ABCC1,ABCG2,ABR,ACBD5,ACE,ACVR2A,ADAR,ADARB1,ADCK1,ADGRA2,ADGRF5,ADORA3,ADSS1,AGTPBP1,AHNAK2,AKAP13,AKAP9,ANKRD24,ANKRD33,ANKRD36,ANKS1A,APAF1,APOD,AR,ARHGAP19,ARHGEF28,ARID2,ARID4A,ARSL,ATE1,ATL1,ATP10A,ATP11A,ATP1A1,ATP2B4,ATP7A,ATP9A,ATR,AXIN2,BCAS3,BCL2L11,BCOR,BICRAL,BIRC6,BOC,BRCA2,BRME1,BTBD8,CAMKK2,CAND2,CARF,CASK,CAST,CC2D2A,CCDC150,CCDC180,CCDC80,CCDC88C,CCSER2,CD177,CDC42BPA,CDON…	435
Cancer,Gastrointestinal Disease,Organismal Injury and Abnormalities	Gastric adenocarcinoma	8.02E-42	41.0958	3.42735e-41	40.465	0	AASS,ABCA6,ABCC1,ACBD4,ACVR2A,ADAMTS10,ADAR,ADARB1,ADCK1,ADCY9,ADGRA2,ADSS1,AFAP1L1,AFF1,AGTPBP1,AHCTF1,AHNAK2,AKAP13,AKAP9,ALDH2,ANKRD20A4P (includes others),ANKRD28,ANKRD36,ANKS1A,APBA1,APP,AR,ARID2,ARID4A,ASAP1,ASAP2,ATG2A,ATP10A,ATP2B4,ATP9A,ATR,AXIN2,B3GNT5,BACE2,BCL9,BCOR,BMAL1,BMPR2,BRCA2,C2CD2,CAPS2,CAST,CAVIN2,CBL,CCDC180,CCDC80,CD109,CD34,CDK5RAP2,CDK6,CDON,CEP162,CEP170,CEP290,CFAP206,…	354
Cancer,Organismal Injury and Abnormalities	Upper aero-digestive squamous cell carcinoma	7.51E-41	40.1244	3.1822e-40	39.4973	0	ABCA6,ABCC1,ADARB1,ADCY9,AFDN,AHNAK2,AKAP9,ANKRD36,APBA1,AR,ARHGAP28,ARID2,ARSG,ASAP1,ASAP2,ASL,ATAD2B,ATG2A,ATP10A,ATP13A3,ATP6V1A,ATP7A,ATP7B,ATR,BAZ2B,BCL9,BCOR,BIRC6,BOC,BRCA2,BTBD3,C2CD2,C2orf81,CCDC150,CCNB1IP1,CDC42BPA,CDK5RAP2,CDK6,CECR2,CELF2,CEP162,CEP290,CEP295,CGNL1,CHD4,CHD6,CHD7,CHN1,CHRNA7,CIT,CLCN3,CLEC16A,CLIC2,CLU,COL7A1,CPEB3,CRACD,CYP1A1,DAB2,DACH1,DCC,DCHS1,DCLRE1A,DENND11,DG…	343
Cancer,Endocrine System Disorders,Organismal Injury and Abnormalities	Neuroendocrine carcinoma	2.96E-40	39.5287	1.24895e-39	38.9035	0	AASS,ABCA6,ABCB7,ABCC1,ABCG2,ABR,ACE,ACVR2A,ADAR,ADCY9,ADORA3,ADSS1,AFDN,AHNAK2,AMOT,ANKHD1-EIF4EBP3,ANKRD20A4P (includes others),ANKRD24,ANKRD28,ANKRD33,ANO6,APAF1,AR,ARHGEF12,ARID2,ARRB1,ARSG,ATP10A,ATP11A,ATP1A1,ATP7A,ATP9A,BCL9,BCOR,BIRC6,BMAL1,BMX,BOC,BRCA2,C2orf81,CARF,CAST,CAVIN2,CBL,CC2D2A,CCDC144A,CCDC88C,CD74,CD93,CDC14A,CDK6,CECR2,CEP120,CEP162,CEP290,CFAP54,CHD6,CHD7,CIT,CLEC16A,CNIH3…	399
Cancer,Endocrine System Disorders,Gastrointestinal Disease,Organismal Injury and Abnormalities	Pancreatic carcinoma	8.09E-40	39.0921	3.39916e-39	38.4686	0	ABCA3,ABCG2,ABR,ACKR3,ACVR2A,ADAMTS10,ADAR,ADARB1,ADORA3,ADRA2A,AFF1,AHCTF1,AHNAK2,AHR,AKAP13,AKAP9,AMOT,ANKHD1-EIF4EBP3,ANKRD24,APAF1,APP,AR,ARFGEF2,ARHGEF12,ARHGEF6,ARID2,ARSL,ATG2A,ATP10A,ATP11A,ATP2B4,ATP7A,ATP7B,ATR,AXIN2,BACE2,BAZ2A,BAZ2B,BCL9,BFAR,BIRC6,BMAL1,BOC,BRCA2,BRME1,C22orf46P,C8orf82,CAMKK2,CARF,CBL,CCDC180,CCDC88C,CCL5,CCN3,CCNB1IP1,CCR7,CD109,CD74,CD93,CDC14A,CDC42BPA,CDK6,CDON,…	363
Cancer,Endocrine System Disorders,Gastrointestinal Disease,Organismal Injury and Abnormalities	Pancreatic adenocarcinoma	1.05E-39	38.9788	4.39331e-39	38.3572	0	ABCA3,ABCG2,ABR,ACKR3,ACVR2A,ADAMTS10,ADAR,ADARB1,ADRA2A,AFF1,AHCTF1,AHNAK2,AKAP13,AKAP9,AMOT,ANKHD1-EIF4EBP3,ANKRD24,APAF1,APP,AR,ARFGEF2,ARHGEF12,ARHGEF6,ARID2,ARSL,ATP10A,ATP11A,ATP2B4,ATP7A,ATP7B,ATR,BACE2,BAZ2A,BAZ2B,BCL9,BFAR,BIRC6,BMAL1,BOC,BRCA2,BRME1,C22orf46P,C8orf82,CAMKK2,CARF,CBL,CCDC180,CCDC88C,CCL5,CCN3,CCNB1IP1,CCR7,CD109,CD74,CD93,CDC14A,CDC42BPA,CDK6,CDON,CEACAM21,CECR2,CELF2,CE…	345
Cancer,Organismal Injury and Abnormalities	Squamous cell carcinoma of the non-oropharynx	1.71E-39	38.767	7.125e-39	38.1472	0	ABCA6,ABCC1,ADARB1,ADCY9,AFDN,AHNAK2,AKAP9,ANKRD36,AR,ARHGAP28,ARID2,ASAP1,ASAP2,ATAD2B,ATG2A,ATP10A,ATP13A3,ATP6V1A,ATP7A,BAZ2B,BCL9,BIRC6,BOC,BRCA2,BTBD3,C2CD2,CCDC150,CCNB1IP1,CDC42BPA,CDK5RAP2,CDK6,CECR2,CELF2,CEP162,CEP290,CEP295,CHD4,CHD6,CHD7,CHN1,CIT,CLCN3,CLEC16A,CLIC2,CLU,COL7A1,CPEB3,CRACD,CYP1A1,DAB2,DACH1,DCC,DCHS1,DCLRE1A,DENND11,DMXL2,DOCK8,DOCK9,DOP1A,DPP4,DYNC2H1,DYRK4,DYSF,EBF1,…	288
Cancer,Endocrine System Disorders,Organismal Injury and Abnormalities	Small-cell carcinoma	4.66E-39	38.3316	1.93361e-38	37.7136	0	AASS,ABCA6,ABCB7,ABCC1,ABCG2,ABR,ACE,ACVR2A,ADAR,ADCY9,ADORA3,AFDN,AHNAK2,AMOT,ANKHD1-EIF4EBP3,ANKRD20A4P (includes others),ANKRD24,ANKRD28,ANKRD33,ANO6,APAF1,AR,ARHGEF12,ARID2,ARRB1,ARSG,ATP10A,ATP11A,ATP1A1,ATP7A,ATP9A,BCL9,BCOR,BIRC6,BMAL1,BMX,BOC,BRCA2,C2orf81,CARF,CAST,CAVIN2,CC2D2A,CCDC144A,CCDC88C,CD74,CD93,CDC14A,CDK6,CECR2,CEP120,CEP162,CEP290,CFAP54,CHD6,CHD7,CIT,CLEC16A,CNIH3,CNTNAP3B,…	389
Cancer,Endocrine System Disorders,Gastrointestinal Disease,Organismal Injury and Abnormalities	Pancreatic ductal adenocarcinoma	1.79E-38	37.7471	7.36626e-38	37.1328	0	ABCA3,ABCG2,ABR,ACKR3,ACVR2A,ADAMTS10,ADAR,ADARB1,ADRA2A,AFF1,AHCTF1,AHNAK2,AKAP13,AKAP9,AMOT,ANKHD1-EIF4EBP3,ANKRD24,APAF1,APP,AR,ARFGEF2,ARHGEF12,ARHGEF6,ARID2,ARSL,ATP10A,ATP11A,ATP2B4,ATP7A,ATP7B,ATR,BACE2,BAZ2A,BAZ2B,BCL9,BFAR,BIRC6,BMAL1,BOC,BRCA2,BRME1,C22orf46P,C8orf82,CAMKK2,CARF,CBL,CCDC180,CCDC88C,CCL5,CCN3,CCNB1IP1,CCR7,CD109,CD74,CD93,CDC14A,CDC42BPA,CDK6,CDON,CEACAM21,CECR2,CELF2,CE…	329
Cancer,Hematological Disease,Immunological Disease,Organismal Injury and Abnormalities	Mature B-cell neoplasm	1.43E-37	36.8447	5.86066e-37	36.2321	0	AASS,ABCC1,ABCG2,ACE,ADAMTS9,ADGRF5,ADRA1D,AGTPBP1,AHCTF1,AHCYL2,AHNAK2,AHR,AMIGO3,AMOT,ANKRD20A4P (includes others),ANKRD24,ANKRD36,ANKS1A,APBA1,APCDD1,APP,ARFGEF3,ARHGEF28,ARID2,ARID4A,ASAP2,ATP10A,ATP13A3,ATP7A,ATR,BAZ2A,BAZ2B,BCL2L11,BCOR,BIRC6,BRCA2,BRME1,CALCRL,CAMKK2,CAVIN2,CC2D2A,CCL5,CCR7,CD34,CD74,CDC14A,CDK6,CDON,CELF2,CEP120,CEP20,CHD4,CHD6,CLEC16A,CNOT3,CNTNAP1,CNTNAP3B,COL7A1,CORO2B…	325
Gastrointestinal Disease,Organismal Injury and Abnormalities	Oral lesion	1.66E-37	36.7799	6.77551e-37	36.1691	0	ABCA6,ABCC1,ACVR2A,ADCY9,AFDN,AHNAK2,AKAP9,ANKRD36,AR,ARID2,ASAP1,ATAD2B,ATP10A,ATP13A3,ATP6V1A,ATP7A,ATR,BAZ2B,BCL9,BIRC6,BOC,BRCA2,BTBD3,C2CD2,CCDC150,CCNB1IP1,CDC42BPA,CDK5RAP2,CDK6,CELF2,CEP162,CEP290,CEP295,CHD4,CHD6,CHD7,CHN1,CIT,CLCN3,CLEC16A,CLU,COL7A1,CPEB3,CRACD,CRLF1,CYP1A1,DACH1,DCLRE1A,DMXL2,DOCK9,DOP1A,DPP4,DYNC2H1,DYRK4,DYSF,EBF1,ECPAS,EHMT2,EP300,EPS15,ETV1,F8,FAM171B,FANCB,FBXO38…	260
Cancer,Gastrointestinal Disease,Organismal Injury and Abnormalities	Oral cavity carcinoma	2.10E-37	36.6778	8.53659e-37	36.0687	0	ABCA6,ABCC1,ACVR2A,ADCY9,AFDN,AHNAK2,AKAP9,ANKRD36,AR,ARID2,ASAP1,ATAD2B,ATP10A,ATP13A3,ATP6V1A,ATP7A,ATR,BAZ2B,BCL9,BIRC6,BOC,BRCA2,BTBD3,C2CD2,CCDC150,CCNB1IP1,CDC42BPA,CDK5RAP2,CDK6,CELF2,CEP162,CEP290,CEP295,CHD4,CHD6,CHD7,CHN1,CIT,CLCN3,CLEC16A,CLU,COL7A1,CPEB3,CRACD,CYP1A1,DACH1,DCLRE1A,DMXL2,DOCK9,DOP1A,DPP4,DYNC2H1,DYRK4,DYSF,EBF1,ECPAS,EP300,EPS15,ETV1,F8,FAM171B,FANCB,FBXO38,FGF11,FIP1L…	251
Cancer,Gastrointestinal Disease,Organismal Injury and Abnormalities	Oral tumor	4.43E-37	36.3536	1.79352e-36	35.7463	0	ABCA6,ABCC1,ACVR2A,ADCY9,AFDN,AHNAK2,AKAP9,ANKRD36,AR,ARID2,ASAP1,ATAD2B,ATP10A,ATP13A3,ATP6V1A,ATP7A,ATR,BAZ2B,BCL9,BIRC6,BOC,BRCA2,BTBD3,C2CD2,CCDC150,CCNB1IP1,CDC42BPA,CDK5RAP2,CDK6,CELF2,CEP162,CEP290,CEP295,CHD4,CHD6,CHD7,CHN1,CIT,CLCN3,CLEC16A,CLU,COL7A1,CPEB3,CRACD,CYP1A1,DACH1,DCLRE1A,DMXL2,DOCK9,DOP1A,DPP4,DYNC2H1,DYRK4,DYSF,EBF1,ECPAS,EP300,EPS15,ETV1,F8,FAM171B,FANCB,FBXO38,FGF11,FIP1L…	256
Cancer,Gastrointestinal Disease,Organismal Injury and Abnormalities	Oral cancer	4.46E-37	36.3507	1.79839e-36	35.7451	0	ABCA6,ABCC1,ACVR2A,ADCY9,AFDN,AHNAK2,AKAP9,ANKRD36,AR,ARID2,ASAP1,ATAD2B,ATP10A,ATP13A3,ATP6V1A,ATP7A,ATR,BAZ2B,BCL9,BIRC6,BOC,BRCA2,BTBD3,C2CD2,CCDC150,CCNB1IP1,CDC42BPA,CDK5RAP2,CDK6,CELF2,CEP162,CEP290,CEP295,CHD4,CHD6,CHD7,CHN1,CIT,CLCN3,CLEC16A,CLU,COL7A1,CPEB3,CRACD,CYP1A1,DACH1,DCLRE1A,DMXL2,DOCK9,DOP1A,DPP4,DYNC2H1,DYRK4,DYSF,EBF1,ECPAS,EP300,EPS15,ETV1,F8,FAM171B,FANCB,FBXO38,FGF11,FIP1L…	255
Cancer,Endocrine System Disorders,Organismal Injury and Abnormalities,Respiratory Disease	Neuroendocrine lung cancer	1.69E-35	34.7721	6.76e-35	34.1701	0	AASS,ABCA6,ABCB7,ABCC1,ABCG2,ABR,ACE,ACVR2A,ADCY9,ADORA3,ADSS1,AFDN,AMOT,ANKHD1-EIF4EBP3,ANKRD24,ANKRD28,ANKRD33,ANO6,APAF1,ARHGEF12,ARID2,ARRB1,ARSG,ATP10A,ATP11A,ATP1A1,ATP7A,ATP9A,BCL9,BCOR,BIRC6,BMX,BOC,BRCA2,C2orf81,CAST,CAVIN2,CBL,CC2D2A,CCDC144A,CCDC88C,CD74,CD93,CDC14A,CDK6,CECR2,CEP120,CEP162,CEP290,CFAP54,CHD6,CIT,CLEC16A,CNIH3,CNTNAP3B,COL7A1,CPEB4,CRACD,CRHBP,CRYBG3,CSF2RB,CSGALNACT1,…	345
Cancer,Gastrointestinal Disease,Organismal Injury and Abnormalities	Oral squamous cell carcinoma	2.03E-35	34.6925	8.08765e-35	34.0922	0	ABCA6,ABCC1,ADCY9,AFDN,AHNAK2,AKAP9,ANKRD36,AR,ARID2,ASAP1,ATAD2B,ATP10A,ATP13A3,ATP6V1A,ATP7A,BAZ2B,BCL9,BIRC6,BOC,BRCA2,BTBD3,C2CD2,CCDC150,CCNB1IP1,CDC42BPA,CDK5RAP2,CDK6,CELF2,CEP162,CEP290,CEP295,CHD4,CHD6,CHD7,CHN1,CIT,CLCN3,CLEC16A,CLU,COL7A1,CPEB3,CRACD,CYP1A1,DACH1,DCLRE1A,DMXL2,DOCK9,DOP1A,DPP4,DYNC2H1,DYRK4,DYSF,EBF1,ECPAS,EP300,F8,FAM171B,FANCB,FBXO38,FIP1L1,FLRT2,FLT1,FNBP1L,FRAS1,FR…	236
Cancer,Organismal Injury and Abnormalities	Head squamous cell carcinoma	2.07E-35	34.684	8.21429e-35	34.0854	0	ABCA6,ABCC1,ADCY9,AFDN,AHNAK2,AKAP9,ANKRD36,AR,ARID2,ASAP1,ATAD2B,ATP10A,ATP13A3,ATP6V1A,ATP7A,BAZ2B,BCL9,BIRC6,BOC,BRCA2,BTBD3,C2CD2,CCDC150,CCNB1IP1,CDC42BPA,CDK5RAP2,CDK6,CELF2,CEP162,CEP290,CEP295,CHD4,CHD6,CHD7,CHN1,CIT,CLCN3,CLEC16A,CLU,COL7A1,CPEB3,CRACD,CYP1A1,DACH1,DCLRE1A,DMXL2,DOCK9,DOP1A,DPP4,DYNC2H1,DYRK4,DYSF,EBF1,ECPAS,EP300,F8,FAM171B,FANCB,FBXO38,FIP1L1,FLRT2,FLT1,FNBP1L,FRAS1,FR…	238
Cancer,Endocrine System Disorders,Organismal Injury and Abnormalities,Respiratory Disease	Lung neuroendocrine carcinoma	2.81E-35	34.5513	1.1063e-34	33.9561	0	AASS,ABCA6,ABCB7,ABCC1,ABCG2,ABR,ACE,ACVR2A,ADCY9,ADORA3,ADSS1,AFDN,AMOT,ANKHD1-EIF4EBP3,ANKRD24,ANKRD28,ANKRD33,ANO6,APAF1,ARHGEF12,ARID2,ARRB1,ARSG,ATP10A,ATP11A,ATP1A1,ATP7A,ATP9A,BCL9,BCOR,BIRC6,BMX,BOC,BRCA2,C2orf81,CAST,CAVIN2,CBL,CC2D2A,CCDC144A,CCDC88C,CD74,CD93,CDC14A,CDK6,CECR2,CEP120,CEP162,CEP290,CFAP54,CHD6,CIT,CLEC16A,CNIH3,CNTNAP3B,COL7A1,CPEB4,CRACD,CRHBP,CRYBG3,CSF2RB,CSGALNACT1,…	344
Cancer,Endocrine System Disorders,Organismal Injury and Abnormalities,Respiratory Disease	Small cell lung carcinoma	4.16E-34	33.3809	1.6e-33	32.7959	0	AASS,ABCA6,ABCB7,ABCC1,ABCG2,ABR,ACE,ACVR2A,ADCY9,ADORA3,AFDN,AMOT,ANKHD1-EIF4EBP3,ANKRD24,ANKRD28,ANKRD33,ANO6,APAF1,ARHGEF12,ARID2,ARRB1,ARSG,ATP10A,ATP11A,ATP1A1,ATP7A,ATP9A,BCL9,BCOR,BIRC6,BMX,BOC,BRCA2,C2orf81,CAST,CAVIN2,CC2D2A,CCDC144A,CCDC88C,CD74,CD93,CDC14A,CDK6,CECR2,CEP120,CEP162,CEP290,CFAP54,CHD6,CIT,CLEC16A,CNIH3,CNTNAP3B,COL7A1,CPEB4,CRACD,CRHBP,CRYBG3,CSF2RB,CSGALNACT1,CSMD2,DACH…	339
Cancer,Organismal Injury and Abnormalities	Epithelial basal cell carcinoma	2.39E-33	32.6216	9.05303e-33	32.0432	0	AASS,ABCC1,ACE,ADARB1,ADCY9,ADGRA2,ADGRF5,AFDN,AGTPBP1,AHNAK2,AHR,AKAP9,ALDH2,ANKHD1-EIF4EBP3,ANKRD33,ANKRD36,ANO6,APAF1,APBA1,AR,ARFGEF2,ARFGEF3,ARHGAP28,ARHGEF12,ARHGEF28,ARHGEF6,ARSG,ATP10A,ATP11A,ATP2B4,ATP7A,ATP7B,ATR,AXIN2,BAZ2A,BCOR,BEND4,BIRC6,BMPR2,BRCA2,CAMKK2,CAPS2,CAST,CBL,CCDC144A,CCDC80,CCNB1IP1,CCR7,CD109,CDK19,CEACAM21,CECR2,CEP192,CHD4,CHD6,CHD7,CHM,CHN1,CHRNA7,CIT,CLCN3,CMKLR1,C…	375
Cancer,Dermatological Diseases and Conditions,Organismal Injury and Abnormalities	Basal cell carcinoma	5.43E-33	32.2652	2.04135e-32	31.6901	0	AASS,ABCC1,ACE,ADARB1,ADCY9,ADGRA2,ADGRF5,AFDN,AGTPBP1,AHNAK2,AKAP9,ALDH2,ANKHD1-EIF4EBP3,ANKRD33,ANKRD36,ANO6,APAF1,APBA1,AR,ARFGEF2,ARFGEF3,ARHGAP28,ARHGEF12,ARHGEF28,ARHGEF6,ARSG,ATP10A,ATP11A,ATP2B4,ATP7A,ATP7B,ATR,AXIN2,BAZ2A,BCOR,BEND4,BIRC6,BMPR2,BRCA2,CAMKK2,CAPS2,CAST,CBL,CCDC144A,CCDC80,CCNB1IP1,CCR7,CD109,CDK19,CEACAM21,CECR2,CEP192,CHD4,CHD6,CHD7,CHM,CHN1,CHRNA7,CIT,CLCN3,CMKLR1,CNOT6…	368
Cancer,Neurological Disease,Organismal Injury and Abnormalities	Grade 3 glioma	2.90E-32	31.5376	1.08209e-31	30.9657	0	AASS,ABCA3,ACE,AFAP1L1,AFF1,AGTPBP1,AHNAK2,AHR,AKAP13,AKAP9,ANKHD1-EIF4EBP3,ANKRD36,ARFGEF1,ARID2,ARRB1,ASAP1,ATG2A,ATP13A3,ATP7B,BAZ2A,BCOR,BIRC6,BMX,C16orf86,C2CD2,CAST,CCDC150,CCDC180,CCDC80,CDKL5,CDS2,CECR2,CEP162,CEP192,CEP290,CHM,CIT,CLIC2,CLU,COL7A1,CRACD,CRYBG1,CTDSPL,CYP1A1,DCHS1,DCLRE1A,DENND11,DNMBP,DOCK6,DOCK8,DOCK9,DOP1A,DROSHA,DYRK4,DYSF,E2F8,ECPAS,EDEM3,EFHC1,EIF4G3,EML4,EML6,ENDOV…	247
Cancer,Neurological Disease,Organismal Injury and Abnormalities	Grade 2-3 glioma	3.48E-32	31.4584	1.29368e-31	30.8882	0	AASS,ABCA3,ACE,ADCY9,AFAP1L1,AFF1,AGTPBP1,AHNAK2,AHR,AKAP13,AKAP9,ANKHD1-EIF4EBP3,ANKRD36,ARFGEF1,ARID2,ARRB1,ASAP1,ATG2A,ATP13A3,ATP7B,BAZ2A,BCOR,BIRC6,BMX,C16orf86,C2CD2,CAST,CCDC150,CCDC180,CCDC80,CDKL5,CDS2,CECR2,CEP162,CEP192,CEP290,CHM,CIT,CLIC2,CLU,COL7A1,CRACD,CRYBG1,CTDSPL,CYP1A1,DCHS1,DCLRE1A,DENND11,DNMBP,DOCK6,DOCK8,DOCK9,DOP1A,DROSHA,DYRK4,DYSF,E2F8,ECPAS,EDEM3,EFHC1,EIF4G3,EML4,EML6…	251
Cancer,Neurological Disease,Organismal Injury and Abnormalities	Grade 3 malignant glioma	3.60E-32	31.4437	1.33333e-31	30.8751	0	AASS,ABCA3,ACE,AFAP1L1,AFF1,AGTPBP1,AHNAK2,AHR,AKAP13,AKAP9,ANKHD1-EIF4EBP3,ANKRD36,ARFGEF1,ARID2,ARRB1,ASAP1,ATG2A,ATP13A3,ATP7B,BAZ2A,BCOR,BIRC6,BMX,C16orf86,C2CD2,CAST,CCDC150,CCDC180,CCDC80,CDKL5,CDS2,CECR2,CEP162,CEP192,CEP290,CHM,CIT,CLIC2,CLU,COL7A1,CRACD,CRYBG1,CTDSPL,CYP1A1,DCHS1,DCLRE1A,DENND11,DNMBP,DOCK6,DOCK8,DOCK9,DOP1A,DROSHA,DYRK4,DYSF,E2F8,ECPAS,EDEM3,EFHC1,EIF4G3,EML4,EML6,ENDOV…	246
Cancer,Hematological Disease,Immunological Disease,Organismal Injury and Abnormalities	Mature B cell malignant tumor	4.18E-32	31.3788	1.54244e-31	30.8118	0	AASS,ABCC1,ABCG2,ACE,ADGRF5,ADRA1D,AGTPBP1,AHCTF1,AHCYL2,AHNAK2,AHR,AMIGO3,AMOT,ANKRD20A4P (includes others),ANKRD24,ANKRD36,ANKS1A,APBA1,APCDD1,APP,ARFGEF3,ARHGEF28,ARID2,ARID4A,ASAP2,ATP10A,ATP13A3,ATP7A,ATR,BAZ2A,BAZ2B,BCL2L11,BCOR,BIRC6,BRCA2,BRME1,CALCRL,CAMKK2,CAVIN2,CC2D2A,CCL5,CCR7,CD34,CDK6,CDON,CELF2,CEP120,CEP20,CHD4,CHD6,CLEC16A,CNOT3,CNTNAP3B,CORO2B,CRACD,CSDE1,CSF2RB,CSMD2,CYSLTR1,D…	279
Cancer,Organismal Injury and Abnormalities,Reproductive System Disease	Ductal breast carcinoma	4.52E-31	30.3449	1.63177e-30	29.7873	0	AASS,ACE,ACVR2A,ADCK1,ALDH2,ANKRD36,APAF1,AR,ARFGEF1,ARID2,ARRB1,ATG2A,ATP7B,ATR,AXIN2,BCL9,BCOR,BMAL2,BMPR2,BMX,BRCA2,CASK,CBL,CCDC180,CCR7,CD109,CDC14A,CDC42BPA,CDK6,CDK7,CDS2,CEP290,CGNL1,CHURC1-FNTB,CIT,CRACD,CRIM1,CRYBG3,CX3CL1,DAXX,DCC,DDIAS,DIRAS1,DPP4,DYSF,EHMT2,ELK4,EML4,EP300,EPAS1,ERN1,ETV1,EZH2,FANCM,FBXW11,FLNB,FMNL2,FNBP1L,FOXO1,FOXP1,FRAS1,FZD4,GATAD2B,GPER1,HCN3,HDAC6,HDAC9,HERC2,…	206
Cancer,Neurological Disease,Organismal Injury and Abnormalities	Brain oligodendroglioma	1.84E-30	29.7352	6.54804e-30	29.1839	0	AASS,ABCA3,ACE,AFAP1L1,AFF1,AGTPBP1,AHNAK2,AHR,AKAP13,AKAP9,ANKHD1-EIF4EBP3,ANKRD36,ARFGEF1,ARID2,ARRB1,ASAP1,ATG2A,ATP13A3,ATP7B,BAZ2A,BCOR,BIRC6,BMX,C16orf86,C2CD2,CAST,CCDC150,CCDC180,CCDC80,CDKL5,CDS2,CECR2,CEP162,CEP192,CEP290,CHM,CIT,CLIC2,COL7A1,CRACD,CRYBG1,CTDSPL,CYP1A1,DCHS1,DCLRE1A,DENND11,DNMBP,DOCK6,DOCK8,DOCK9,DOP1A,DROSHA,DYRK4,DYSF,E2F8,ECPAS,EDEM3,EFHC1,EIF4G3,EML4,EML6,ENDOV,EP3…	240
Cancer,Endocrine System Disorders,Organismal Injury and Abnormalities,Reproductive System Disease	Ovarian cancer	6.33E-30	29.1986	2.22887e-29	28.6519	0	ABCA3,ABCA6,ABR,ADAMTS10,ADGRF5,ADORA3,AGTPBP1,AHNAK2,AKAP9,ANKRD24,ANKRD36,APBA1,APCDD1,AR,ARHGEF12,ARHGEF28,ARID2,ASAP1,ATP1A1,ATR,AXIN2,BCL2L11,BDH1,BMX,BRCA2,C2orf81,CAMKK2,CAST,CBL,CCDC180,CCDC80,CCDC88C,CD109,CD74,CDK19,CDK6,CDK7,CDS2,CEP120,CEP290,CEP295,CFAP96,CFB,CLDN7,CLIP3,CLU,COL7A1,CORO2B,CPEB4,CREBRF,CRHBP,CSF2RB,CTDSPL,CYP1A1,DAB2,DACH1,DCHS1,DCLRE1A,DDIAS,DMXL2,DOCK8,DOCK9,DOP1A,D…	293
Cancer,Neurological Disease,Organismal Injury and Abnormalities	Oligodendroglioma	1.42E-29	28.8477	4.94774e-29	28.3056	0	AASS,ABCA3,ACE,ADARB1,AFAP1L1,AFF1,AGTPBP1,AHNAK2,AHR,AKAP13,AKAP9,ANKHD1-EIF4EBP3,ANKRD36,ARFGEF1,ARID2,ARRB1,ASAP1,ATG2A,ATP13A3,ATP7B,BAZ2A,BCOR,BIRC6,BMX,BRME1,C16orf86,C2CD2,CAST,CCDC150,CCDC180,CCDC80,CDKL5,CDS2,CECR2,CEP162,CEP192,CEP290,CHM,CIT,CLIC2,COL7A1,CRACD,CRYBG1,CTDSPL,CYP1A1,DCHS1,DCLRE1A,DENND11,DNMBP,DOCK6,DOCK8,DOCK9,DOP1A,DROSHA,DYRK4,DYSF,E2F8,ECPAS,EDEM3,EFHC1,EIF4G3,EML4,E…	244
Cancer,Endocrine System Disorders,Organismal Injury and Abnormalities,Reproductive System Disease	Ovarian carcinoma	2.19E-29	28.6596	7.55172e-29	28.122	0	ABCA3,ABCA6,ABR,ADAMTS10,ADGRF5,ADORA3,AGTPBP1,AHNAK2,AKAP9,ANKRD24,ANKRD36,APBA1,APCDD1,AR,ARHGEF12,ARHGEF28,ARID2,ASAP1,ATP1A1,ATR,AXIN2,BCL2L11,BDH1,BMX,BRCA2,C2orf81,CAMKK2,CAST,CCDC180,CCDC80,CCDC88C,CD109,CDK19,CDK6,CDS2,CEP120,CEP290,CEP295,CFAP96,CLDN7,CLIP3,CLU,COL7A1,CORO2B,CPEB4,CREBRF,CRHBP,CSF2RB,CTDSPL,CYP1A1,DAB2,DCHS1,DCLRE1A,DDIAS,DMXL2,DOCK8,DOCK9,DOP1A,DPP4,DROSHA,DYNC2H1,EEF1B…	269
Cancer,Organismal Injury and Abnormalities	Mixed neoplasia	7.39E-28	27.1314	2.50508e-27	26.6012	0	ABCA3,ABR,ACE,ACVR2A,ADAMTS10,ADGRF5,AMOT,ANKRD24,ANKRD36,AR,ARFGEF1,ARHGEF28,ARID2,ASAP1,ATP1A1,ATP7A,ATR,BCL9,BCOR,BDH1,BRCA2,BTBD3,BTBD8,CAST,CCSER2,CD109,CDK19,CDK6,CDS2,CECR2,CELF1,CEP192,CEP290,CEP295,CHD4,CHRNA7,CHURC1-FNTB,CIB1,CLIP3,CNOT6L,COL7A1,CORO2B,CPEB4,CREBRF,CRHBP,CRLF1,CSMD2,DCC,DCHS1,DDIAS,DLGAP4,DMXL2,DOCK9,DPP4,DROSHA,DYNC2H1,ECPAS,ELAPOR2,EML6,EP300,EP400,EPAS1,EZH2,FAM171B,…	233
Cancer,Endocrine System Disorders,Organismal Injury and Abnormalities,Reproductive System Disease	Development of ovarian tumor	1.81E-27	26.7423	6.05351e-27	26.218	0	ABCA3,ABCA6,ABR,ADAMTS10,ADGRF5,ADORA3,AGTPBP1,AHNAK2,AKAP9,ANKRD24,ANKRD36,APBA1,APCDD1,AR,ARHGEF12,ARHGEF28,ARID2,ASAP1,ATP1A1,ATR,AXIN2,BCL2L11,BDH1,BMX,BRCA2,C2orf81,CAMKK2,CAST,CCDC180,CD109,CDK19,CDS2,CEP120,CEP290,CEP295,CFAP96,CLDN7,CLIP3,CLU,COL7A1,CORO2B,CPEB4,CREBRF,CRHBP,CSF2RB,CUL9,CYP1A1,DAB2,DCHS1,DCLRE1A,DDIAS,DMXL2,DOCK8,DOCK9,DOP1A,DPP4,DROSHA,DYNC2H1,EEF1B2,EHMT2,ELAPOR2,EML6,E…	248
Cancer,Endocrine System Disorders,Organismal Injury and Abnormalities,Reproductive System Disease	Ovarian adenocarcinoma	3.13E-27	26.5045	1.03987e-26	25.983	0	ABCA3,ABCA6,ABR,ADAMTS10,ADGRF5,ADORA3,AGTPBP1,AHNAK2,AKAP9,ANKRD24,ANKRD36,APBA1,APCDD1,AR,ARHGEF12,ARHGEF28,ARID2,ASAP1,ATP1A1,ATR,AXIN2,BCL2L11,BDH1,BMX,BRCA2,C2orf81,CAMKK2,CAST,CCDC180,CD109,CDK19,CDS2,CEP120,CEP290,CEP295,CFAP96,CLDN7,CLIP3,CLU,COL7A1,CORO2B,CPEB4,CREBRF,CRHBP,CSF2RB,CYP1A1,DAB2,DCHS1,DCLRE1A,DDIAS,DMXL2,DOCK8,DOCK9,DOP1A,DPP4,DROSHA,DYNC2H1,EEF1B2,EHMT2,ELAPOR2,EML6,EP300,…	247
Cancer,Organismal Injury and Abnormalities,Renal and Urological Disease	Renal cell carcinoma	5.43E-27	26.2652	1.79801e-26	25.7452	0	ACVR2A,ADGRF5,ADORA3,ADSS1,AFDN,AKAP9,ALDH2,ANKRD36,APOD,APP,AR,ARFGEF3,ARID2,ASAP1,ATF7,ATP13A3,ATR,AXIN2,BFAR,BRCA2,BRME1,C2CD2,C2orf81,CALCRL,CCDC150,CCDC80,CCL5,CDK5RAP2,CDK6,CEP170,CEP20,CGNL1,CHURC1-FNTB,CIT,CLDN7,CLIP3,CLOCK,CLU,COL7A1,CRACD,CREBRF,CRYBG1,CSF2RB,CTDSPL,CUL9,CX3CL1,CYP1A1,DACH1,DCAF11,DCLRE1A,DENND5A,DIRAS1,DNAJC16,DNALI1,DNMBP,DOCK8,DOP1A,E2F8,EEF1B2,EP300,EP400,EPAS1,ETS1…	251
Cancer,Organismal Injury and Abnormalities	Clear-cell adenocarcinoma	9.29E-26	25.032	3.05592e-25	24.5149	0	ACVR2A,ADSS1,AFDN,AKAP9,ALDH2,ANKRD36,APOD,APP,AR,ARFGEF3,ARID2,ASAP1,ATF7,ATP13A3,ATR,AXIN2,BFAR,BRCA2,BRME1,CCDC150,CCL5,CDK5RAP2,CDK6,CEP170,CEP20,CGNL1,CHURC1-FNTB,CIT,CLDN7,CLOCK,CLU,COL7A1,CRACD,CREBRF,CRYBG1,CSF2RB,CUL9,CX3CL1,DACH1,DCAF11,DCLRE1A,DENND5A,DIRAS1,DNAJC16,DNMBP,DOCK8,DOP1A,E2F8,EEF1B2,EP300,EP400,EPAS1,ETS1,ETV1,EZH2,F8,FANCM,FAT4,FBXL7,FILIP1,FLRT2,FLT1,FMC1-LUC7L2,FNBP1L,F…	220
Hereditary Disorder,Neurological Disease,Organismal Injury and Abnormalities	Familial central nervous system disease	1.23E-25	24.9101	4.01961e-25	24.3958	0	ABCA3,ABCB7,ABI1,ACBD5,ACE,ADAR,ADARB1,ADK,ADRA1D,ADRA2A,AGTPBP1,ALDH2,ANO6,APOD,APP,AR,ARFGEF1,ARFGEF2,ARHGEF28,ARHGEF6,ARID2,ARSL,ATL1,ATP11A,ATP1A1,ATP6V1A,ATP7A,ATP7B,ATP9A,ATR,BCAS3,BRCA2,CAMKK2,CASK,CBLN1,CC2D2A,CCDC88C,CCL5,CD74,CDK19,CDKL5,CDON,CELF2,CEP120,CEP290,CHD4,CHD7,CHN1,CHRNA7,CLCN3,CLIC2,CLU,CMKLR1,CNOT3,CORO2B,CRIM1,CRLF1,CX3CL1,DCC,DENND5A,DMXL2,DNAJC16,DNALI1,DOCK8,DSTYK,DUSP…	271
Cancer,Organismal Injury and Abnormalities	Clear cell neoplasm	4.22E-25	24.3747	1.37459e-24	23.8618	0	ACVR2A,ADSS1,AFDN,AKAP9,ALDH2,ANKRD36,APOD,APP,AR,ARFGEF3,ARID2,ASAP1,ATF7,ATP13A3,ATR,AXIN2,BCOR,BFAR,BRCA2,BRME1,CCDC150,CCL5,CDK5RAP2,CDK6,CEP170,CEP20,CGNL1,CHURC1-FNTB,CIT,CLDN7,CLOCK,CLU,COL7A1,CRACD,CREBRF,CRYBG1,CSF2RB,CUL9,CX3CL1,DACH1,DCAF11,DCLRE1A,DENND5A,DIRAS1,DNAJC16,DNMBP,DOCK8,DOP1A,E2F8,EEF1B2,EP300,EP400,EPAS1,ETS1,ETV1,EZH2,F8,FANCM,FAT4,FBXL7,FILIP1,FLRT2,FLT1,FMC1-LUC7L2,FNB…	221
Hereditary Disorder,Neurological Disease,Organismal Injury and Abnormalities	Familial encephalopathy	5.35E-25	24.2716	1.73701e-24	23.7602	0	ABCA3,ABCB7,ABI1,ACBD5,ACE,ADAR,ADARB1,ADK,ADRA1D,ADRA2A,AGTPBP1,ALDH2,ANO6,APOD,APP,ARFGEF1,ARFGEF2,ARHGEF28,ARHGEF6,ARID2,ARSL,ATL1,ATP11A,ATP1A1,ATP6V1A,ATP7A,ATP7B,ATP9A,ATR,BCAS3,BRCA2,CAMKK2,CASK,CBLN1,CC2D2A,CCDC88C,CCL5,CD74,CDK19,CDKL5,CDON,CELF2,CEP120,CEP290,CHD4,CHD7,CHN1,CHRNA7,CLCN3,CLIC2,CLU,CMKLR1,CNOT3,CORO2B,CRIM1,CRLF1,CX3CL1,DCC,DENND5A,DMXL2,DNAJC16,DNALI1,DOCK8,DSTYK,DUSP14,…	262
Developmental Disorder,Organismal Injury and Abnormalities	Autism spectrum disorder or intellectual disability	6.49E-25	24.1878	2.10032e-24	23.6777	0	ABCA3,ADARB1,ADK,ADRA1D,ADRA2A,ADSS1,ALDH2,AMOT,APP,ARFGEF2,ARHGEF6,ARID2,ARSL,ASL,ATP10A,ATP1A1,ATP6V1A,ATP7A,ATP9A,ATR,BCAS3,BCL9,BEND4,BICRAL,BIRC6,BORCS7-ASMT,BRCA2,CASK,CC2D2A,CCDC88C,CCL5,CDC42BPA,CDKL5,CEP290,CHD4,CHRNA7,CIT,CLCN3,CLIC2,CLU,CNOT3,CNTNAP1,CSDE1,CSMD2,DCC,DMXL2,DOCK8,DPP4,DYNC2H1,DYSF,EEF1B2,EP300,ERC1,ERMP1,FMNL2,FMO5,FOXO6,FOXP1,GABRP,GATAD2B,GLCCI1,GMPPA,GNA14,HDAC6,HERC1…	193
Cancer,Organismal Injury and Abnormalities,Renal and Urological Disease	Renal clear cell adenocarcinoma	1.16E-24	23.9355	3.71795e-24	23.4297	0	ACVR2A,ADSS1,AFDN,AKAP9,ALDH2,ANKRD36,APOD,APP,AR,ARFGEF3,ARID2,ASAP1,ATF7,ATP13A3,ATR,AXIN2,BFAR,BRCA2,BRME1,CCDC150,CCL5,CDK5RAP2,CDK6,CEP170,CEP20,CGNL1,CHURC1-FNTB,CIT,CLOCK,COL7A1,CRACD,CREBRF,CRYBG1,CSF2RB,CUL9,CX3CL1,DACH1,DCAF11,DCLRE1A,DENND5A,DIRAS1,DNAJC16,DNMBP,DOCK8,DOP1A,E2F8,EEF1B2,EP300,EP400,EPAS1,ETS1,ETV1,EZH2,F8,FAT4,FBXL7,FILIP1,FLRT2,FLT1,FMC1-LUC7L2,FNBP1L,FOXO1,GALNT6,GARR…	211
Cancer,Organismal Injury and Abnormalities,Renal and Urological Disease	Kidney clear cell tumor	3.76E-24	23.4248	1.20128e-23	22.9204	0	ACVR2A,ADSS1,AFDN,AKAP9,ALDH2,ANKRD36,APOD,APP,AR,ARFGEF3,ARID2,ASAP1,ATF7,ATP13A3,ATR,AXIN2,BCOR,BFAR,BRCA2,BRME1,CCDC150,CCL5,CDK5RAP2,CDK6,CEP170,CEP20,CGNL1,CHURC1-FNTB,CIT,CLOCK,COL7A1,CRACD,CREBRF,CRYBG1,CSF2RB,CUL9,CX3CL1,DACH1,DCAF11,DCLRE1A,DENND5A,DIRAS1,DNAJC16,DNMBP,DOCK8,DOP1A,E2F8,EEF1B2,EP300,EP400,EPAS1,ETS1,ETV1,EZH2,F8,FAT4,FBXL7,FILIP1,FLRT2,FLT1,FMC1-LUC7L2,FNBP1L,FOXO1,GALNT6…	212
Cancer,Organismal Injury and Abnormalities	Formation of soft tissue neoplasm	4.34E-24	23.3625	1.38217e-23	22.8594	0	ABCA6,ABCC1,ABCG2,ADAMTS10,ADAR,ADARB1,AFF1,AHNAK2,AKAP13,AKAP9,AKR1E2,ANKRD24,ANKRD33,ANKRD36,ANKRD65,ANKS1A,ARFGEF3,ARHGAP19,ARHGEF28,ARID4A,ARSG,ARSL,ASAP1,ASAP2,ATG2A,ATP10A,ATP11A,ATP7A,ATP7B,ATR,AXIN2,BAZ2B,BCAS3,BCL9,BFAR,BIRC6,BMAL2,BRCA2,BRME1,BTBD8,C19orf33,CAMKK2,CAND2,CAST,CCDC144A,CCDC180,CCDC88C,CCN3,CCSER2,CD109,CD34,CDC42BPA,CDK5RAP2,CDK7,CDON,CEACAM21,CECR2,CEP120,CEP170,CEP192,C…	390
Cancer,Gastrointestinal Disease,Organismal Injury and Abnormalities	Rectosigmoid neoplasm	5.64E-24	23.2487	1.79048e-23	22.747	0	AASS,ACBD5,ACVR2A,ADRA1D,APAF1,APOD,AR,ARHGEF28,ARID4A,ARSL,ATAT1,ATG2A,ATP13A3,ATP2B4,ATP9A,AXIN2,BCL9,BMPR2,CCDC150,CDK6,CEP162,CEP170,CEP290,CHD6,CHD7,CLIP3,CLOCK,CRACD,DCC,DCHS1,DDX39B,DENND2C,DNALI1,DOCK6,DOP1A,DYNC2H1,EFNB2,EFR3A,EP400,ETS1,FAM120B,FAM13C,FAM171B,FLNB,FLRT2,FLT1,FNBP1L,GEN1,GPER1,GSE1,HDAC6,HEATR5B,HECW2,HGF,HRCT1,IL6,INPP5D,ITGBL1,ITPKB,ITSN2,JAM3,JCAD,JPH2,JPH4,KAT2B,KCNN…	163
Developmental Disorder,Organismal Injury and Abnormalities	Neurodevelopmental delay or intellectual disability	8.04E-24	23.0947	2.53628e-23	22.5958	0	ABCA3,ADARB1,ADK,ADRA1D,ADRA2A,ADSS1,ALDH2,AMOT,APP,ARFGEF2,ARHGEF6,ARID2,ARSL,ATP1A1,ATP6V1A,ATP7A,ATP9A,ATR,BCAS3,BCL9,BRCA2,CASK,CC2D2A,CDK19,CDKL5,CEP290,CHD4,CHRNA7,CIT,CLIC2,CNOT3,DCC,DOCK6,DOCK8,DYNC2H1,EEF1B2,EP300,ERC1,FMO5,FOXP1,GABRP,GATAD2B,GMPPA,HECW2,HERC1,HERC2,HNRNPH1,IQSEC1,IRX5,JMJD1C,KCNN3,KDM3B,KLHL15,KMT2A,KMT2C,KMT2E,LAMC3,LPIN1,LRBA,MACF1,MBOAT7,MED12,MED16,MED23,MID2,MLIP,…	148
Cancer,Organismal Injury and Abnormalities	Stromal neoplasm	1.10E-23	22.9586	3.45912e-23	22.461	0	ABCA6,ABCC1,ABCG2,ADAMTS10,ADAR,ADARB1,AHNAK2,AKAP13,AKAP9,AKR1E2,ANKRD24,ANKRD33,ANKRD36,ANKRD65,ANKS1A,AR,ARFGEF3,ARHGAP19,ARHGEF28,ARID4A,ARSG,ARSL,ASAP1,ASAP2,ATG2A,ATP10A,ATP11A,ATP7A,ATP7B,ATR,AXIN2,BAZ2B,BCAS3,BCL9,BCOR,BFAR,BIRC6,BMAL2,BRCA2,BRME1,BTBD8,C19orf33,CAMKK2,CAND2,CAST,CCDC144A,CCDC180,CCDC88C,CCN3,CCSER2,CD109,CD34,CDC42BPA,CDK5RAP2,CDK7,CDON,CEACAM21,CECR2,CEP120,CEP170,CEP19…	390
Cancer,Hematological Disease,Immunological Disease,Organismal Injury and Abnormalities	B-cell non-Hodgkin lymphoma	2.94E-23	22.5317	9.13043e-23	22.0395	0	AASS,ABCC1,ABCG2,ACE,ADGRF5,ADORA3,AHR,AMIGO3,AMOT,ANKRD24,ANKRD36,APBA1,APCDD1,APP,ARFGEF3,ARHGEF28,ASAP2,ATP10A,ATP13A3,ATP7A,BAZ2B,BCL2L11,BCOR,BIRC6,BRCA2,CALCRL,CAMKK2,CC2D2A,CCL5,CCR7,CD34,CDK6,CDON,CELF2,CHD4,CHD6,CNOT3,CORO2B,CRACD,CSDE1,CSF2RB,CSMD2,CUL9,DCC,DCHS1,DGKA,DNMBP,DOP1B,DSTYK,DYSF,EBF1,EHMT2,EP300,ETS1,ETV1,EZH2,FAM13C,FANCB,FAT4,FBXO25,FIP1L1,FLRT2,FMC1-LUC7L2,FNBP1L,FOXO1,FO…	211
Cancer,Organismal Injury and Abnormalities	Gastrointestinal stromal tumor	3.11E-23	22.5072	9.62848e-23	22.0164	0	ABCA6,ABCC1,ABCG2,ADAMTS10,ADAR,ADARB1,AHNAK2,AKAP13,AKAP9,AKR1E2,ANKRD24,ANKRD33,ANKRD36,ANKRD65,ANKS1A,ARFGEF3,ARHGAP19,ARHGEF28,ARID4A,ARSG,ARSL,ASAP1,ASAP2,ATG2A,ATP10A,ATP11A,ATP7A,ATP7B,ATR,AXIN2,BAZ2B,BCAS3,BCL9,BFAR,BIRC6,BMAL2,BRCA2,BRME1,BTBD8,C19orf33,CAMKK2,CAND2,CAST,CCDC144A,CCDC180,CCDC88C,CCN3,CCSER2,CD109,CD34,CDC42BPA,CDK5RAP2,CDK7,CDON,CEACAM21,CECR2,CEP120,CEP170,CEP192,CFAP20…	385
Cancer,Gastrointestinal Disease,Organismal Injury and Abnormalities	Rectum tumor	4.73E-23	22.3251	1.45988e-22	21.8357	0	AASS,ACBD5,ACVR2A,ADRA1D,APAF1,APOD,AR,ARHGEF28,ARID4A,ARSL,ATAT1,ATG2A,ATP13A3,ATP2B4,ATP9A,AXIN2,BCL9,BMPR2,CCDC150,CEP162,CEP170,CEP290,CHD6,CHD7,CLIP3,CLOCK,CRACD,DCC,DCHS1,DDX39B,DENND2C,DNALI1,DOCK6,DOP1A,DYNC2H1,EFNB2,EFR3A,EP400,ETS1,FAM120B,FAM13C,FAM171B,FLNB,FLRT2,FLT1,FNBP1L,GEN1,GPER1,GSE1,HDAC6,HEATR5B,HECW2,HGF,HRCT1,IL6,INPP5D,ITGBL1,ITPKB,ITSN2,JAM3,JCAD,JPH2,JPH4,KAT2B,KCNN3,KCT…	159
Developmental Disorder,Organismal Injury and Abnormalities	Autism or intellectual disability	6.97E-23	22.1568	2.13804e-22	21.67	0	ABCA3,ADARB1,ADK,ADRA1D,ADRA2A,ADSS1,ALDH2,AMOT,APP,ARFGEF2,ARHGEF6,ARID2,ARSL,ASL,ATP1A1,ATP6V1A,ATP7A,ATP9A,ATR,BCAS3,BCL9,BRCA2,CASK,CC2D2A,CDKL5,CEP290,CHD4,CHRNA7,CIT,CLIC2,CNOT3,CSDE1,CSMD2,DCC,DOCK8,DYNC2H1,EEF1B2,EP300,ERC1,ERMP1,FMO5,FOXP1,GABRP,GATAD2B,GMPPA,HDAC6,HERC1,HERC2,HNRNPH1,IL6,IQSEC1,IRX5,JMJD1C,KCNN3,KDM3B,KLHL15,KMT2A,KMT2C,KMT2E,KSR2,LAMC3,LRBA,MACF1,MBOAT7,MED12,MED16,MED…	148
Cancer,Organismal Injury and Abnormalities	Gastrointestinal stromal tumor in fibrous tissue	7.56E-23	22.1215	2.31193e-22	21.636	0	ABCA6,ABCC1,ABCG2,ADAMTS10,ADAR,ADARB1,AHNAK2,AKAP13,AKAP9,AKR1E2,ANKRD24,ANKRD33,ANKRD36,ANKRD65,ANKS1A,ARFGEF3,ARHGAP19,ARHGEF28,ARID4A,ARSG,ARSL,ASAP1,ASAP2,ATG2A,ATP10A,ATP11A,ATP7A,ATP7B,ATR,AXIN2,BAZ2B,BCAS3,BCL9,BFAR,BIRC6,BMAL2,BRCA2,BRME1,BTBD8,C19orf33,CAMKK2,CAND2,CAST,CCDC144A,CCDC180,CCDC88C,CCN3,CCSER2,CD109,CDC42BPA,CDK5RAP2,CDK7,CDON,CEACAM21,CECR2,CEP120,CEP170,CEP192,CFAP206,CGN…	380
Developmental Disorder,Neurological Disease,Organismal Injury and Abnormalities	Mental retardation	4.18E-22	21.3788	1.27052e-21	20.896	0	ABCA3,ADARB1,ADK,ADRA1D,ADRA2A,ADSS1,ALDH2,AMOT,APP,ARFGEF2,ARHGEF6,ARID2,ARSL,ATP1A1,ATP6V1A,ATP7A,ATP9A,ATR,BCAS3,BCL9,BRCA2,CASK,CC2D2A,CDKL5,CEP290,CHD4,CHRNA7,CIT,CLIC2,CNOT3,DCC,DOCK8,DYNC2H1,EEF1B2,EP300,ERC1,FMO5,FOXP1,GABRP,GATAD2B,GMPPA,HERC1,HERC2,HNRNPH1,IQSEC1,IRX5,JMJD1C,KCNN3,KDM3B,KLHL15,KMT2A,KMT2C,KMT2E,LAMC3,LRBA,MACF1,MBOAT7,MED12,MED16,MED23,MID2,MLIP,MPDZ,MTOR,MYCBP2,MYO6,NB…	135
Cancer,Gastrointestinal Disease,Organismal Injury and Abnormalities	Cecum adenocarcinoma	6.28E-22	21.202	1.89157e-21	20.7232	0	ACVR2A,ANKRD28,AR,ARID2,ATAT1,ATG2A,ATP13A3,AXIN2,BCL9,BMPR2,BRCA2,BTBD8,CCDC180,CDC42BPA,CDK6,CDS2,CEP290,CHD4,CLOCK,COL7A1,CRACD,CRHBP,CSGALNACT1,DAXX,DOCK6,DOCK8,DTX4,DYSF,EDNRB,EFHC1,EIF4G3,ELAPOR2,EP300,EP400,FAM171B,FIP1L1,FLNB,GOLGB1,HIF3A,HPS1,IDE,IGF2R,IQGAP2,IRAK3,ITPKB,JAK1,JPH4,KCNN3,KLHL3,KMT2C,LRRC8C,MARF1,MAST4,MIDEAS,MLLT3,MRTFB,MTCL1,MTOR,MYEOV,NBAS,NCOA3,NF1,NLRC5,NOTCH1,NSD1,NT…	123
Cancer,Gastrointestinal Disease,Organismal Injury and Abnormalities	Distal colorectal carcinoma	6.36E-22	21.1965	1.90991e-21	20.719	0	AASS,ACBD5,ACVR2A,APAF1,APOD,AR,ARSL,ATAT1,ATP13A3,ATP2B4,ATP9A,AXIN2,BCL9,CCDC150,CDK6,CEP162,CEP170,CEP290,CHD6,CHD7,CLIP3,CRACD,DCC,DCHS1,DENND2C,DNALI1,DOCK6,DOP1A,DYNC2H1,EFNB2,EFR3A,EP400,ETS1,FAM120B,FAM13C,FAM171B,FLNB,FLRT2,FLT1,FNBP1L,GEN1,GPER1,GSE1,HDAC6,HEATR5B,HECW2,HGF,HRCT1,INPP5D,ITGBL1,ITPKB,ITSN2,JAM3,JCAD,JPH2,JPH4,KAT2B,KCNN3,KCTD12,KDR,KIAA1671,KIF13B,KIF24,KIT,KMT2A,KMT2E,L…	144
Cancer,Gastrointestinal Disease,Organismal Injury and Abnormalities	Rectal adenocarcinoma	3.77E-21	20.4237	1.11869e-20	19.9513	0	AASS,ACBD5,ACVR2A,APAF1,APOD,AR,ARSL,ATAT1,ATP13A3,ATP2B4,ATP9A,AXIN2,BCL9,CCDC150,CEP162,CEP170,CEP290,CHD6,CHD7,CLIP3,CRACD,DCC,DCHS1,DENND2C,DNALI1,DOCK6,DOP1A,DYNC2H1,EFNB2,EFR3A,EP400,ETS1,FAM120B,FAM13C,FAM171B,FLNB,FLRT2,FLT1,FNBP1L,GEN1,GPER1,GSE1,HDAC6,HEATR5B,HECW2,HGF,HRCT1,INPP5D,ITGBL1,ITPKB,ITSN2,JAM3,JCAD,JPH2,JPH4,KAT2B,KCNN3,KCTD12,KDR,KIAA1671,KIF13B,KIF24,KIT,KMT2A,KMT2E,LAMC1,…	140
Cancer,Gastrointestinal Disease,Organismal Injury and Abnormalities	Rectum cancer	5.41E-21	20.2668	1.59587e-20	19.797	0	AASS,ACBD5,ACVR2A,ADRA1D,APAF1,APOD,AR,ARSL,ATAT1,ATP13A3,ATP2B4,ATP9A,AXIN2,BCL9,CCDC150,CEP162,CEP170,CEP290,CHD6,CHD7,CLIP3,CRACD,DCC,DCHS1,DENND2C,DNALI1,DOCK6,DOP1A,DYNC2H1,EFNB2,EFR3A,EP400,ETS1,FAM120B,FAM13C,FAM171B,FLNB,FLRT2,FLT1,FNBP1L,GEN1,GPER1,GSE1,HDAC6,HEATR5B,HECW2,HGF,HRCT1,IL6,INPP5D,ITGBL1,ITPKB,ITSN2,JAM3,JCAD,JPH2,JPH4,KAT2B,KCNN3,KCTD12,KDR,KIAA1671,KIF13B,KIF24,KIT,KMT2A,K…	145
Cancer,Organismal Injury and Abnormalities	Serous neoplasm	8.69E-21	20.061	2.54839e-20	19.5937	0	ABCA3,ABCA6,ADORA3,AHNAK2,ANKRD24,ANKRD36,APBA1,APCDD1,APOD,AR,ARHGEF12,ARHGEF28,ARID2,ATR,AXIN2,BCL2L11,BMX,BRCA2,CAMKK2,CEP120,CFAP96,CFB,CHD4,CIT,CLDN7,CLIC2,CLU,CREBRF,CSF2RB,CYP1A1,DAB2,DCHS1,DCLRE1A,DOCK8,DOP1A,DPP4,DROSHA,EDNRB,EEF1B2,EHMT2,EP300,EP400,FAT4,FLRT2,FLT1,FOXD1,FOXM1,FOXO1,FRAS1,GARRE1,GPER1,GUCY1A1,HCN3,HEPH,HGF,HIVEP1,HMCN1,HPS3,IFIH1,IGFBP5,IL6,IQGAP2,ITGA2,ITGA8,ITGAX,ITPR…	166
Cancer,Organismal Injury and Abnormalities,Skeletal and Muscular Disorders	Muscle tumor	1.07E-20	19.9706	3.12865e-20	19.5046	0	ADARB1,AFF1,AHCTF1,AHR,AKAP13,APOLD1,ARFGEF2,ARFGEF3,ARSL,ATP2B4,ATR,BCOR,BDH1,BRCA2,CALCRL,CAVIN2,CBL,CC2D2A,CCDC150,CD109,CD34,CELF2,CFB,CHD4,CLEC16A,COL7A1,CRIM1,CSF2RB,DACH1,DAXX,DLGAP4,DOCK6,DOP1B,EDNRB,EIF4G3,EPM2A,EPS15,ETV1,FLT1,FOXM1,FOXO1,GPER1,GSE1,GUCY1A1,HECW2,HERC1,HGF,HRCT1,HSPG2,HTR1B,IFIH1,IGFBP5,INPP5D,IQGAP1,IRAG1,IRF6,ITPR3,JPH4,KCNN3,KDM3B,KDR,KIF20B,KIT,KLF11,KMT2C,LAMB2,LDL…	151
Cancer,Organismal Injury and Abnormalities	Serous adenocarcinoma	1.12E-20	19.9508	3.26531e-20	19.4861	0	ABCA3,ABCA6,ADORA3,AHNAK2,ANKRD24,ANKRD36,APBA1,APCDD1,APOD,AR,ARHGEF12,ARHGEF28,ARID2,ATR,AXIN2,BCL2L11,BMX,BRCA2,CAMKK2,CEP120,CFAP96,CFB,CIT,CLDN7,CLIC2,CLU,CREBRF,CSF2RB,CYP1A1,DAB2,DCHS1,DCLRE1A,DOCK8,DOP1A,DPP4,DROSHA,EDNRB,EEF1B2,EHMT2,EP300,EP400,FAT4,FLRT2,FLT1,FOXD1,FOXM1,FOXO1,FRAS1,GARRE1,GPER1,GUCY1A1,HCN3,HEPH,HGF,HIVEP1,HMCN1,HPS3,IFIH1,IGFBP5,IL6,IQGAP2,ITGA2,ITGA8,ITGAX,ITPR3,JAM…	165
Cancer,Organismal Injury and Abnormalities,Respiratory Disease	Upper respiratory tract neoplasm	1.57E-20	19.8041	4.55072e-20	19.3419	0	ABCB7,ABCC1,ADARB1,AKAP13,AKAP9,AR,ARFGEF3,ARHGAP28,ARID2,ASAP2,ATG2A,ATP7A,ATR,BCAS3,BCOR,BRCA2,CCR7,CDK6,CECR2,CGNL1,CHD4,CLEC16A,CLIC2,CRYBG1,CSGALNACT1,CYSLTR1,DAB2,DCC,DCHS1,DENND11,DMXL2,DOCK8,DYRK4,EDEM3,EML4,EP300,EP400,ETV1,EZH2,FAT4,FBXL7,FIP1L1,FLI1,FLRT2,FLT1,FMC1-LUC7L2,FOXP1,FRS2,GEN1,GFOD1,GHR,GIGYF2,GPER1,GTF3C1,GUCY1A1,HGF,HPS3,HRCT1,IDE,IL18R1,IL6,IRF6,ITGA8,JCAD,JMJD1C,KALRN,KC…	153
Cancer,Hematological Disease,Immunological Disease,Organismal Injury and Abnormalities	Mature T-cell neoplasm	1.91E-20	19.719	5.52023e-20	19.258	0	ADAMTS9,ADAR,AHCTF1,AHNAK2,ALDH2,ANKRD36,ARHGEF6,ARID2,ATR,AXIN2,BCL2L11,BCL9,BCOR,BIRC6,BRCA2,CAVIN2,CCDC144A,CCR7,CCSER2,CDON,CELF2,CEP120,CEP162,CEP170,CHD6,CHM,CHRFAM7A,CLU,CNTNAP3B,CPNE3,CRACD,CRAMP1,CRYBG1,CSF2RB,DCC,DENND11,DMXL2,DNMBP,DOCK6,DOP1A,DPP4,DYSF,EFNB2,EIF4G3,EOGT,EP300,EP400,EPAS1,EPB41L4A,ERC1,ETS1,EZH2,FAM171B,FANCM,FAT4,FGF11,FOLH1,FOXP1,FRAS1,FSIP2,GARRE1,GHR,GOLGA8A,GPER1,…	177
Cancer,Hematological Disease,Organismal Injury and Abnormalities	Mature T-cell or NK-cell neoplasm	2.09E-20	19.6799	6.02305e-20	19.2202	0	ADAMTS9,ADAR,AHCTF1,AHNAK2,ALDH2,ANKRD36,ARHGEF6,ARID2,ATR,AXIN2,BCL2L11,BCL9,BCOR,BIRC6,BRCA2,CAVIN2,CCDC144A,CCR7,CCSER2,CDON,CELF2,CEP120,CEP162,CEP170,CHD6,CHM,CHRFAM7A,CLU,CNTNAP3B,CPNE3,CRACD,CRAMP1,CRYBG1,CSF2RB,DCC,DENND11,DMXL2,DNMBP,DOCK6,DOP1A,DPP4,DYSF,EFNB2,EIF4G3,EOGT,EP300,EP400,EPAS1,EPB41L4A,ERC1,ETS1,EZH2,FAM171B,FANCM,FAT4,FGF11,FOLH1,FOXP1,FRAS1,FSIP2,GARRE1,GHR,GOLGA8A,GPER1,…	179
Cancer,Hematological Disease,Immunological Disease,Organismal Injury and Abnormalities	Chronic lymphocytic leukemia or small lymphocytic lymphoma or prolymphocytic leukemia	6.22E-20	19.2062	1.78223e-19	18.749	0	AASS,ABCC1,ADGRF5,AHCTF1,AHNAK2,AMOT,ANKRD36,APP,ARHGEF28,ARHGEF6,ASAP2,ATP10A,BAZ2A,BAZ2B,BCL2L11,BCOR,BIRC6,BRME1,CALCRL,CCDC144A,CCSER2,CD74,CDC14A,CDON,CEP162,CEP170,CHD6,CHM,CHRFAM7A,CNOT3,CNTNAP3B,CRACD,CRAMP1,CSDE1,CSF2RB,DGKA,DMXL2,DNMBP,DOCK6,DOP1A,DOP1B,DSTYK,DUSP23,DYSF,EHMT2,EIF4G3,EOGT,EP300,EP400,EPB41L4A,ETV1,EZH2,FANCB,FANCM,FAT4,FCMR,FIP1L1,FLRT2,FLT1,FMC1-LUC7L2,FOLH1,FOXO1,FRAS…	180
Organismal Injury and Abnormalities,Reproductive System Disease	Benign pelvic disease	5.14E-19	18.289	1.43175e-18	17.8441	0	ACE,ADAMTS10,ADARB1,ADRA1D,ADRA2A,AHNAK2,AHR,APCDD1,APOD,APOLD1,AR,ARFGEF2,ARID2,ARSL,ATG2A,ATP7B,BAZ2A,BDH1,BIRC6,BRCA2,BTBD3,CALCRL,CAND2,CAVIN2,CBL,CCDC180,CCL23,CD109,CD34,CELF2,CFB,CHD6,CLEC11A,CLEC16A,COL7A1,CRAMP1,CRIM1,CRIP1,CX3CL1,DCAF11,DLGAP4,DOCK8,EDNRB,EPS15,ETV1,FCHSD2,FLT1,FMNL2,FOXO1,FOXP1,FST,GPC5,GPER1,GRAMD1C,GUCY1A1,HEY2,HGF,HLA-C,HLA-DPB1,IFIH1,IGFBP5,IL18R1,IL6,IQGAP1,IRAG1,…	166
Cancer,Hematological Disease,Immunological Disease,Organismal Injury and Abnormalities	Diffuse B-cell lymphoma	1.48E-18	17.8297	4.04372e-18	17.3932	0	AASS,ABCC1,ADGRF5,ADORA3,AHR,AMIGO3,AMOT,ANKRD36,APP,ARHGEF28,ASAP2,ATP10A,ATP7A,BAZ2B,BCL2L11,BCOR,BIRC6,BRCA2,CALCRL,CD34,CDON,CHD6,CNOT3,CRACD,CSDE1,DCHS1,DGKA,DNMBP,DOP1B,DSTYK,EBF1,EHMT2,EP300,ETS1,ETV1,EZH2,FANCB,FAT4,FIP1L1,FLRT2,FMC1-LUC7L2,FOXO1,FOXP1,GPER1,GSE1,GYS1,HDAC6,HDAC9,HECW2,HIP1,HMCN1,HTR1D,IFIH1,IL6,INTS3,IQGAP1,IRAG1,IRAG2,IRX5,ITPKB,ITSN2,JAK1,KALRN,KDM2B,KDR,KIT,KLHL24,KMT…	132
Cancer,Endocrine System Disorders,Organismal Injury and Abnormalities	Abdominal neuroendocrine tumor	4.94E-18	17.3063	1.3244e-17	16.878	0	ACBD5,ACE,ADAR,ADARB1,ADCY9,ADRA1D,ADRA2A,AHNAK2,AKAP13,AMOT,ANKRD24,ANO6,AR,ARHGAP19,ARHGEF6,ATF7,ATP10A,ATP7A,ATP9A,BCAS3,BEND4,BMAL1,BRCA2,CARF,CCDC180,CECR2,CFAP54,CHD7,CLU,CNTNAP3B,CREBRF,CRHBP,CRYBG3,CSMD2,CUL9,CYP4X1,DACH1,DAXX,DOP1B,DYSF,EIF6,EML6,EP300,EP400,EPAS1,EPM2A,ERN1,FAT4,FLT1,FSIP2,GNMT,GOLGA6L9,GPATCH8,GTF2I,GUCY1A1,HERC1,HES4,HSPG2,IL18R1,IRAG2,ITPR3,KCNJ12,KDR,KIT,KMT2A,KMT2C…	149
Cancer,Organismal Injury and Abnormalities,Respiratory Disease	Upper airway cancer	1.05E-17	16.9788	2.77778e-17	16.5563	0	ABCB7,ABCC1,ADARB1,AKAP13,AKAP9,AR,ARFGEF3,ARHGAP28,ARID2,ASAP2,ATG2A,ATP7A,BCAS3,BCOR,CCR7,CDK6,CECR2,CGNL1,CHD4,CLIC2,CRYBG1,CSGALNACT1,DAB2,DCC,DCHS1,DENND11,DMXL2,DOCK8,DYRK4,EDEM3,EML4,EP300,EP400,ETV1,EZH2,FAT4,FBXL7,FIP1L1,FLI1,FLRT2,FLT1,FMC1-LUC7L2,FRS2,GEN1,GFOD1,GHR,GPER1,GTF3C1,GUCY1A1,HGF,HPS3,HRCT1,IL6,IRF6,ITGA8,JCAD,JMJD1C,KALRN,KCNJ12,KCNN3,KDR,KIT,KMT2A,KMT2C,LRRC8C,LTBP1,LYST,M…	142
Cancer,Hematological Disease,Immunological Disease,Organismal Injury and Abnormalities	Diffuse lymphoma	1.18E-17	16.9281	3.10526e-17	16.5079	0	AASS,ABCC1,ACE,ADGRF5,ADORA3,AHR,AMIGO3,AMOT,ANKRD36,APP,ARHGEF28,ASAP2,ATP10A,ATP13A3,ATP7A,BAZ2B,BCL2L11,BCOR,BIRC6,BRCA2,CALCRL,CD34,CDK6,CDON,CHD4,CHD6,CNOT3,CRACD,CSDE1,DCHS1,DGKA,DNMBP,DOP1B,DSTYK,EBF1,EHMT2,EP300,ETS1,ETV1,EZH2,FANCB,FAT4,FIP1L1,FLRT2,FMC1-LUC7L2,FOXO1,FOXP1,GEN1,GPER1,GSE1,GYS1,HDAC6,HDAC9,HECW2,HERC1,HGF,HIP1,HMCN1,HTR1D,IFIH1,IL6,INTS3,IQGAP1,IRAG1,IRAG2,IRX5,ITPKB,ITSN…	148
Cardiovascular Disease,Organismal Injury and Abnormalities	Microangiopathy	2.55E-17	16.5935	6.64063e-17	16.1778	0	ABCG2,ACE,ADRA1D,ADRA2A,AFDN,AHR,AMOT,AR,ATR,BCAS3,BCOR,BMPR2,BRCA2,CEP290,CFB,CLU,DAXX,EPAS1,EPHA4,EZH2,FANCB,FANCM,FAT4,FLNB,FLT1,FOXM1,GNA14,HGF,IL6,JAK1,KDR,KIAA1549,KIT,KMT2A,KMT2C,LAMA4,LIFR,LPL,MAP3K1,MECOM,MLLT3,NF1,NID1,NOTCH1,NRP2,NSD1,PIK3CG,PIK3R2,PJA2,PPARG,PRDM1,PRKDC,PRKN,RANBP2,RNF213,SETD2,SH2B3,TEK,TGFBR2,TSC1,VWF,ZMIZ1	62
Endocrine System Disorders,Gastrointestinal Disease,Metabolic Disease,Organismal Injury and Abnormalities	Non-insulin-dependent diabetes mellitus	4.13E-17	16.384	1.0617e-16	15.974	0	ABCC1,ABCG2,ACACA,ACBD4,ACE,ADAMTS9,ADARB1,ADK,ADRA2A,ALDH2,ANKRD28,ANO6,AR,ARID2,ARID4A,ARSG,ATP10A,BACE2,BCL2L11,BIRC6,BMAL1,BMPR2,BOC,CAMKK2,CAND2,CAST,CCNB1IP1,CDC42BPA,CDK6,CELF1,CEP120,CGNL1,CHD4,CLEC16A,CLU,CMKLR1,CPEB3,CREBRF,CX3CL1,CYSLTR1,DCAF7,DCC,DENND2C,DMXL2,DPP4,DSTYK,DYNC2H1,DYRK4,EDNRB,EHMT2,EML6,EP300,EP400,EPB41L4B,EPHA4,ERN1,ETFDH,ETS1,ETV1,EXOC6B,FILIP1,FLI1,FLT1,FMO5,FOCAD,F…	185
Developmental Disorder,Hereditary Disorder,Neurological Disease,Organismal Injury and Abnormalities	Familial neurodevelopmental disorder	5.59E-17	16.2526	1.41519e-16	15.8492	0	ADARB1,AGTPBP1,ARFGEF1,ARID2,ASL,ATP6V1A,ATP9A,BAZ2B,BCAS3,CASK,CBL,CC2D2A,CDK19,CDKL5,CELF2,CHD7,CLCN3,CLIC2,CNOT3,CRACD,CSDE1,DCC,DENND5A,DMXL2,DYNC2H1,EDNRB,EP300,FBXW11,FOXP1,GHR,GMPPA,HECW2,HEPH,HIP1,HTR1B,HTR1D,IRAK3,JARID2,KATNAL2,KDM3B,KDR,KIT,KMT2C,KMT2E,LAMC3,LRBA,MACF1,MAST3,MBOAT7,MTOR,MYO1C,NAV2,NBAS,NCDN,NF1,NFIB,NOVA2,NRP2,NSD1,NSF,NUP98,PCDH12,PCDH19,PIGO,PIK3R2,PLCB1,POGZ,PRUNE1,…	98
[truncated: 223 more rows]

## Sheet: Canonical Pathways
Ingenuity Canonical Pathways	p-value	-log(p-value)	p-adjust	-log10(p-adjust)	Ratio	Absolute z-score	Molecules
[truncated: 1,037 more rows]

[truncated: 2 more sheets: Upstream Regulators, Regulators Effect]
